# Supplementary material for: Characterization and Proteomic Analysis of Plasma EVs Recovered from Healthy and Diseased Dogs with Canine Leishmaniosis
Source: MDPI journal article supplement (doi:10.3390/ijms24065490), 2023-03-13
Supplement: s1 [file s1]

Supplementary Material

| Clinical signs                                                                 | 20 | 21 | 22 | 23 | 24 | 25 | 26 | 27 | 28 | 29 | 30 | 31 | 32 | 33 | 34 | 35 | 36 | 37 | 38 | 39 |
|--------------------------------------------------------------------------------|----|----|----|----|----|----|----|----|----|----|----|----|----|----|----|----|----|----|----|----|
| Lymphadenopathy                                                                |    |    |    |    |    |    |    |    |    |    |    |    |    |    |    |    |    |    |    |    |
| Epistaxis                                                                      |    |    |    |    |    |    |    |    |    |    |    |    |    |    |    |    |    |    |    |    |
| Weight loss                                                                    |    |    |    |    |    |    |    |    |    |    |    |    |    |    |    |    |    |    |    |    |
| Cachexia                                                                       |    |    |    |    |    |    |    |    |    |    |    |    |    |    |    |    |    |    |    |    |
| Dermatological lesions                                                         |    |    |    |    |    |    |    |    |    |    |    |    |    |    |    |    |    |    |    |    |
| Furfuraceous dermatitis                                                        |    |    |    |    |    |    |    |    |    |    |    |    |    |    |    |    |    |    |    |    |
| Alopecia                                                                       |    |    |    |    |    |    |    |    |    |    |    |    |    |    |    |    |    |    |    |    |
| Crusts                                                                         |    |    |    |    |    |    |    |    |    |    |    |    |    |    |    |    |    |    |    |    |
| Ulcers/ wounds                                                                 |    |    |    |    |    |    |    |    |    |    |    |    |    |    |    |    |    |    |    |    |
| Erythema                                                                       |    |    |    |    |    |    |    |    |    |    |    |    |    |    |    |    |    |    |    |    |
| Sebaceous seborrhoea                                                           |    |    |    |    |    |    |    |    |    |    |    |    |    |    |    |    |    |    |    |    |
| Skin granulomas                                                                |    |    |    |    |    |    |    |    |    |    |    |    |    |    |    |    |    |    |    |    |
| Papular dermatitis                                                             |    |    |    |    |    |    |    |    |    |    |    |    |    |    |    |    |    |    |    |    |
| Nasal planum hyperkeratosis                                                    |    |    |    |    |    |    |    |    |    |    |    |    |    |    |    |    |    |    |    |    |
| Mucocutaneous junctions depigmentation and ulceration (eg. nasal planum, lips) |    |    |    |    |    |    |    |    |    |    |    |    |    |    |    |    |    |    |    |    |
| Ear pinna ulceration and/or hyperkeratosis                                     |    |    |    |    |    |    |    |    |    |    |    |    |    |    |    |    |    |    |    |    |
| Onychogryphosis                                                                |    |    |    |    |    |    |    |    |    |    |    |    |    |    |    |    |    |    |    |    |
| Ulceration of the scrotum/ penis or balanitis                                  |    |    |    |    |    |    |    |    |    |    |    |    |    |    |    |    |    |    |    |    |
| Ophthalmic lesions                                                             |    |    |    |    |    |    |    |    |    |    |    |    |    |    |    |    |    |    |    |    |
| Uveitis                                                                        |    |    |    |    |    |    |    |    |    |    |    |    |    |    |    |    |    |    |    |    |
| Blepharitis                                                                    |    |    |    |    |    |    |    |    |    |    |    |    |    |    |    |    |    |    |    |    |
| Periocular exfoliative alopecia                                                |    |    |    |    |    |    |    |    |    |    |    |    |    |    |    |    |    |    |    |    |
| Conjunctivitis                                                                 |    |    |    |    |    |    |    |    |    |    |    |    |    |    |    |    |    |    |    |    |
| Muscular-skeleton                                                              |    |    |    |    |    |    |    |    |    |    |    |    |    |    |    |    |    |    |    |    |
| Arthritis                                                                      |    |    |    |    |    |    |    |    |    |    |    |    |    |    |    |    |    |    |    |    |
| Muscle atrophy                                                                 |    |    |    |    |    |    |    |    |    |    |    |    |    |    |    |    |    |    |    |    |
| Hematological abnormalities                                                    |    |    |    |    |    |    |    |    |    |    |    |    |    |    |    |    |    |    |    |    |
| Anemia                                                                         |    |    |    |    |    |    |    |    |    |    |    |    |    |    |    |    |    |    |    |    |
| Thrombocytopenia                                                               |    |    |    |    |    |    |    |    |    |    |    |    |    |    |    |    |    |    |    |    |
| Thrombocytosis                                                                 |    |    |    |    |    |    |    |    |    |    |    |    |    |    |    |    |    |    |    |    |
| Leukocytosis                                                                   |    |    |    |    |    |    |    |    |    |    |    |    |    |    |    |    |    |    |    |    |
| Leukopaenia                                                                    |    |    |    |    |    |    |    |    |    |    |    |    |    |    |    |    |    |    |    |    |
| Pancytopenia                                                                   |    |    |    |    |    |    |    |    |    |    |    |    |    |    |    |    |    |    |    |    |

**Figure S1.** Clinical signs of the CanL dogs. Clinical signs are divided into unspecific, more general clinical signs (lyphadenopathy, epistaxis, weight loss and cachexia) and more specific clinical signs compatible with CanL – dermatological lesions, ophthalmological lesions, muscular skeleton lesions and hematological abnormalities. NA – not available.

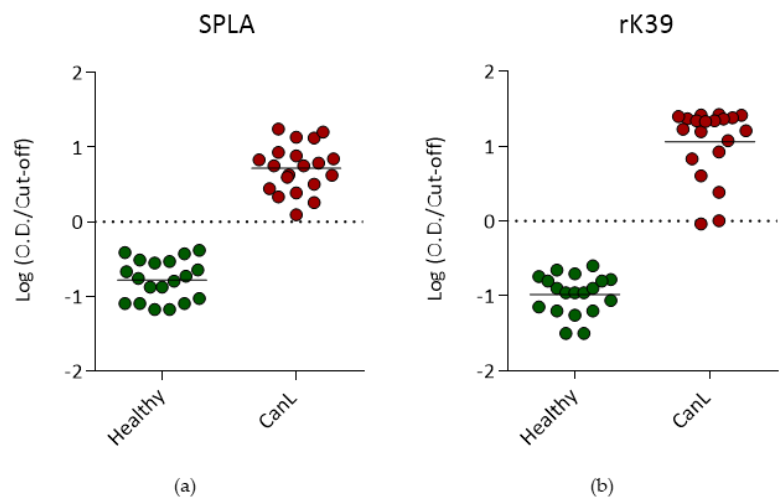

**Figure S2.** Reactivity of sera from CanL confirmed cases and healthy dogs to (a) SPLA and (b) rK39 determined by ELISA. Coatings were done with 10 µg/mL for SPLA and 5 µg/mL rK39. Results are represented as the logarithm of the optical density at 492 nm normalized by the cut-off value for each antigen.

The ashed lines represent the cut-off. Data was generated from the average of two independent assays.

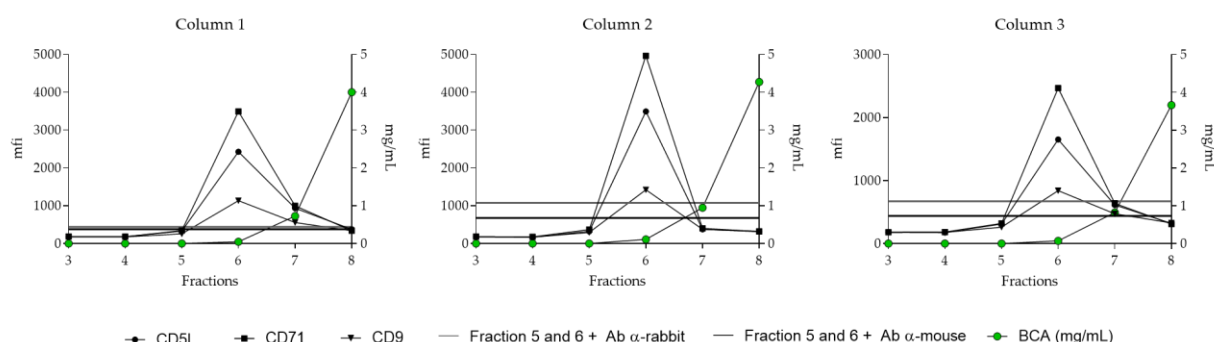

**Figure S3.** Results of BCA (mg/mL), bead-based assay for FACS analysis with CD5L, CD71 and CD9 and respective controls (mfi) for fractions 3-8 obtained from SEC for column 1, 2 and 3. Control – beads + Fraction 5 and 6 + secondary antibody.

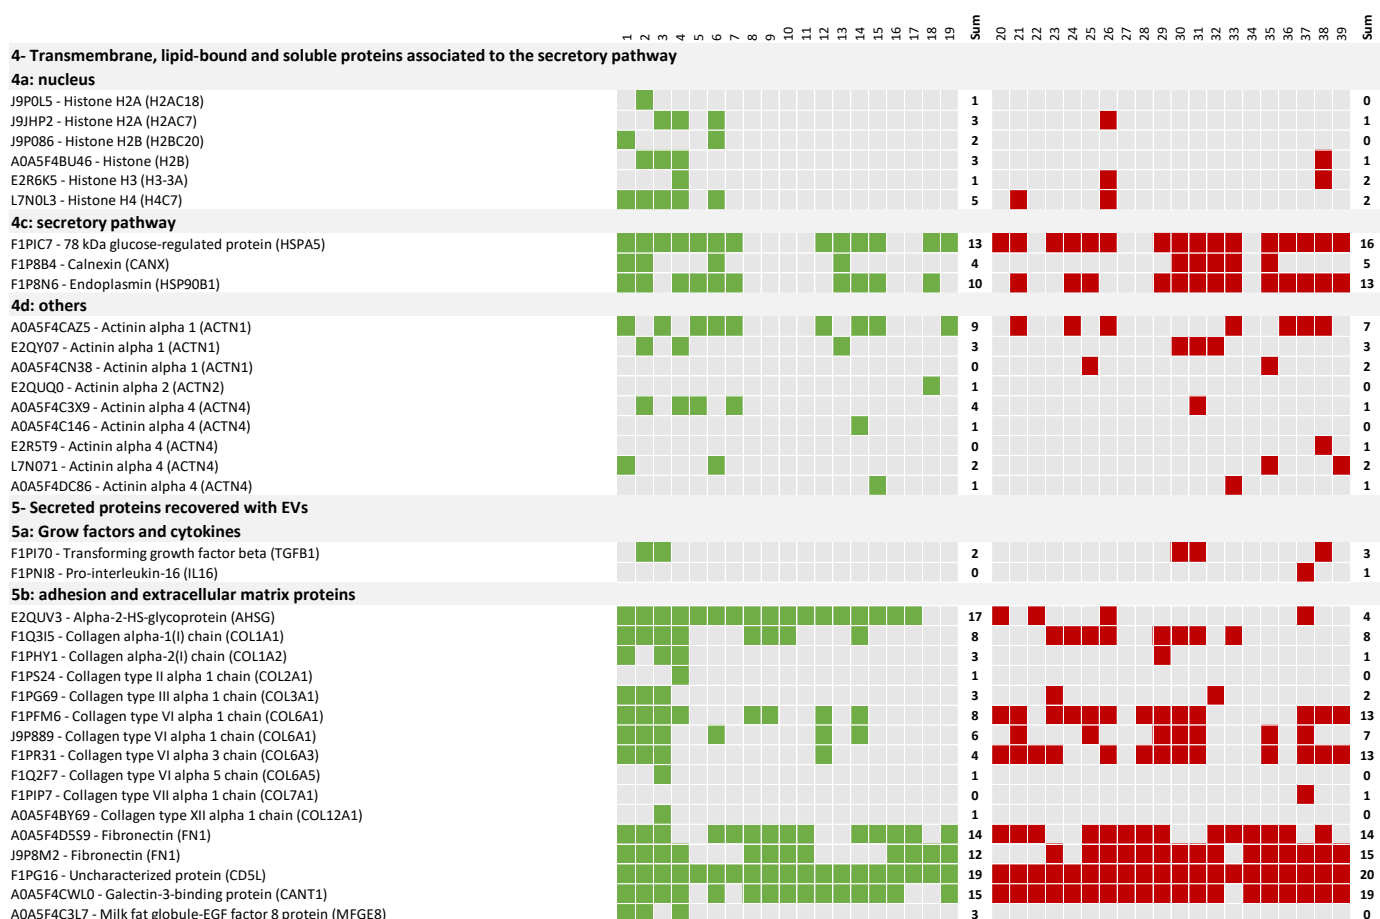

**Figure S4.** Protein content- EV characterization based on the Mysev2018. Each line represents a protein, while the columns labelled with a number represent the individual samples. The presence of green (Healthy group) or red colour (CanL group) associated to individual proteins depicted in lines represents the detection of that protein in the sample with at least 2 unique peptides.

**Table S5.** List of accession numbers, description, fold change and p value associated to the proteins significantly altered abundance in CanL EVs and respective peptides, Peptide-Spectrum Matches (PSMs) and unique peptides identified in healthy and CanL EVs.

| Accession                                        | Description                                                            | Fold change        |         | Peptides | PSMs  | Unique Peptides |
|--------------------------------------------------|------------------------------------------------------------------------|--------------------|---------|----------|-------|-----------------|
|                                                  |                                                                        | (CanL/<br>Healthy) | p value |          |       |                 |
| Proteins significantly more abundant in CanL EVs |                                                                        |                    |         |          |       |                 |
| E2R5J3                                           | LIM domain containing preferred translocation partner in lipoma (SDF4) | 100                | 1.7E-16 | 2        | 10    | 2               |
| F1P9P7                                           | Stromal cell derived factor 4 (SDHA)                                   | 100                | 1.7E-16 | 2        | 6     | 2               |
| A0A5F4CYV2                                       | Succinate dehydrogenase complex flavoprotein subunit A (LPP)           | 100                | 1.7E-16 | 2        | 2     | 2               |
| F1PPE5                                           | Biorientation of chromosomes in cell division 1 like 1 (BOD1L1)        | 100                | 1.7E-16 | 2        | 2     | 2               |
| F1PRL5                                           | Solute carrier family 25 member 5 (SLC25A5)                            | 94.20              | 4.7E-05 | 2        | 2     | 2               |
| Proteins significantly less abundant in CanL EVs |                                                                        |                    |         |          |       |                 |
| F2Z4Q6                                           | Serum albumin (AFP)                                                    | 0.061              | 4.4E-02 | 61       | 30291 | 4               |
| Q2Z1P8                                           | Anion exchange protein (SLC4A1)                                        | 0.06               | 4.1E-02 | 35       | 5705  | 35              |
| P60524                                           | Hemoglobin subunit beta (HBB)                                          | 0.058              | 3.7E-02 | 17       | 4571  | 3               |
| F1PYZ1                                           | GLOBIN domain-containing protein (LOC609402)                           | 0.058              | 3.8E-02 | 18       | 4207  | 2               |
| P60529                                           | Hemoglobin subunit alpha (HBA)                                         | 0.055              | 3.1E-02 | 11       | 2110  | 2               |
| Q6Q7P4                                           | Protein 4.1 (EPB41)                                                    | 0.045              | 1.6E-02 | 34       | 1350  | 4               |
| F1PD51                                           | Erythrocyte membrane protein band 4.2 (EPB42)                          | 0.042              | 1.3E-02 | 33       | 934   | 32              |
| E2QVU9                                           | Biliverdin reductase B (BLVRB)                                         | 0.038              | 9.1E-03 | 11       | 490   | 11              |
| F1PBK6                                           | Carbonic anhydrase 1 (CA1)                                             | 0.038              | 9.2E-03 | 13       | 431   | 13              |
| F1PDY8                                           | Carbonic anhydrase 2                                                   | 0.036              | 7.8E-03 | 14       | 350   | 14              |
| A0A5F4DER9                                       | Aquaporin-1 (AQP1)                                                     | 0.036              | 7.9E-03 | 4        | 217   | 4               |
| A0A5F4D567                                       | Uncharacterized protein                                                | 0.036              | 1.3E-02 | 9        | 208   | 2               |
| A7VLI5                                           | Glycophorin C (GYPC)                                                   | 0.034              | 5.8E-03 | 3        | 202   | 3               |
| Q3BCQ5                                           | Ammonium transporter Rh type A (RHAG)                                  | 0.028              | 8.6E-04 | 4        | 123   | 4               |
| Q3BCQ6                                           | Rh antigen-like protein (Rh30)                                         | 0.028              | 2.8E-03 | 4        | 93    | 4               |
| P02727                                           | Glycophorin-A (GYPA)                                                   | 0.027              | 2.4E-03 | 2        | 51    | 2               |
| E2R629                                           | Atypical chemokine receptor 1 (ACKR1)                                  | 0.026              | 2.2E-03 | 2        | 35    | 2               |
| E2QTD8                                           | Myo-inositol oxygenase (MIOX)                                          | 0.017              | 3.1E-04 | 3        | 15    | 3               |
| F1PBM2                                           | Vesicle trafficking 1 (VTA1)                                           | 0.010              | 1.7E-16 | 2        | 9     | 2               |
| A0A5F4DD49                                       | Serine incorporator 3 (SERINC3)                                        | 0.010              | 1.7E-16 | 2        | 7     | 2               |
| P27597                                           | T-cell surface glycoprotein CD3 epsilon chain (CD3E)                   | 0.010              | 1.7E-16 | 3        | 5     | 3               |
| A0A5F4CCI6                                       | Serine/threonine kinase 24 (STK24)                                     | 0.010              | 1.7E-16 | 2        | 5     | 2               |
| E2RK13                                           | Protein XRP2 (RP2)                                                     | 0.010              | 1.7E-16 | 2        | 5     | 2               |
| E2R3J3                                           | G protein subunit alpha z (GNAZ)                                       | 0.010              | 1.7E-16 | 2        | 3     | 2               |

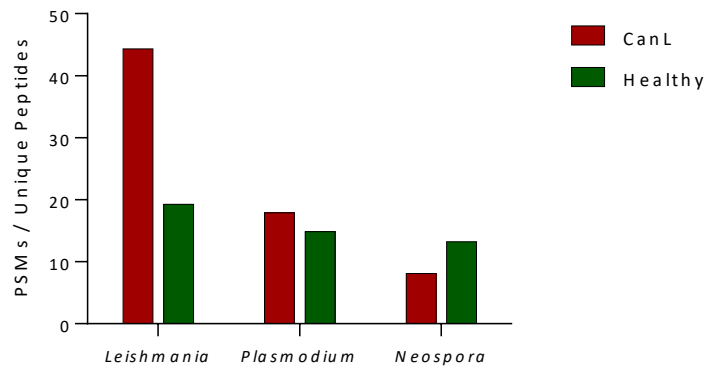

**Figure S5.** Number of PSMs per unique peptides identified for the two groups, Healthy and CanL, using different pathogens databases: *L. infantum*, *P. falciparum* and *N. caninum*.

**Table S7.** List of the *L. infantum* proteins found in more than one CanL sample. TriTrypDB accession number, Uniprot accession number, description and associated PSMs, unique peptides and peptide identification confidence, and corresponding number of dogs in which the protein was identified.

| TriTrypDB<br>Accession number | Uniprot Accession<br>number | Description                                      | PSMs | Unique<br>Peptides | Confidence | Total number of dogs |
|-------------------------------|-----------------------------|--------------------------------------------------|------|--------------------|------------|----------------------|
| LINF_140020900                | A4HW91                      | Uncharacterized protein                          | 1    | 1                  | Medium     | 4                    |
|                               |                             |                                                  | 1    | 1                  | Medium     |                      |
|                               |                             |                                                  | 1    | 1                  | High       |                      |
|                               |                             |                                                  | 1    | 1                  | Medium     |                      |
| LINF_160020100                | A4HX38                      | Uncharacterized protein                          | 1    | 1                  | High       | 3                    |
|                               |                             |                                                  | 3    | 1                  | High       |                      |
| LINF_190010100                | A4HY74                      | Uncharacterized protein                          | 6    | 1                  | High       | 2                    |
|                               |                             |                                                  | 2    | 1                  | High       |                      |
| LINF_280028700                | A4I3U9                      | Uncharacterized protein                          | 1    | 1                  | Medium     | 2                    |
|                               |                             |                                                  | 1    | 1                  | Medium     |                      |
| LINF_320042300                | A4I8H2                      | Uncharacterized protein                          | 1    | 1                  | Medium     | 2                    |
|                               |                             |                                                  | 1    | 1                  | Medium     |                      |
|                               |                             |                                                  | 1    | 1                  | Medium     |                      |
| LINF_330029800                | A4I980                      | Putative copper-transporting ATPase-like protein | 3    | 1                  | Medium     | 3                    |
|                               |                             |                                                  | 2    | 1                  | Medium     |                      |
| LINF_340007500                | A4I9J4                      | Uncharacterized protein                          | 2    | 1                  | Medium     | 2                    |
|                               |                             |                                                  | 1    | 1                  | Medium     |                      |
| LINF_340019300                | A4I9T5                      | Uncharacterized protein                          | 1    | 1                  | High       | 2                    |
|                               |                             |                                                  | 2    | 1                  | Medium     |                      |
|                               |                             |                                                  | 4    | 1                  | High       |                      |
|                               |                             |                                                  | 1    | 1                  | Medium     |                      |
| LINF_350022800                | A4I879                      | Putative DNA polymerase epsilon subunit b        | 6    | 1                  | Medium     | 6                    |
|                               |                             |                                                  | 1    | 1                  | Low        |                      |
|                               |                             |                                                  | 2    | 1                  | Medium     |                      |
|                               |                             |                                                  | 1    | 1                  | Medium     |                      |
| LINF_350034700                | A4I8I2                      | Uncharacterized protein                          | 3    | 1                  | Medium     | 2                    |
|                               |                             |                                                  | 2    | 1                  | Medium     |                      |
| LINF_360045700                | A4ID28                      | Mitogen activated kinase-like protein            | 2    | 1                  | High       | 2                    |
|                               |                             |                                                  | 1    | 1                  | Medium     |                      |
| LINF_120011000                | E9AGE5                      | Uncharacterized protein                          | 8    | 1                  | High       | 2                    |
|                               |                             |                                                  | 4    | 1                  | High       |                      |

**Table S8.** List of *L. infantum* proteins identified in more than one CanL dog, and respective UniProt accession number, peptide sequence identified and peptide blast result performed in NCBI.

| Accession | Description                                      | Peptides                      | Blast (100% match with <i>Leishmania</i> spp./ Match with other species) |
|-----------|--------------------------------------------------|-------------------------------|--------------------------------------------------------------------------|
| A4HW91    | Uncharacterized protein                          | [K].EESSEEEELLVIGAVPLEFER.[L] | 100% match with <i>Leishmania</i> spp.                                   |
| A4HX38    | Uncharacterized protein                          | [K].TLVSLQPK.[L]              | 100% match with <i>Leishmania</i> spp.                                   |
| A4HY74    | Uncharacterized protein                          | [R].YTADRVENTKNIFWQHCR.[Y]    | 100% match with <i>Leishmania</i> spp.                                   |
| A4I3U9    | Uncharacterized protein                          | [R].TIALAQR.[E]               | Match with other species                                                 |
| A4I8H2    | Uncharacterized protein                          | [R].LPAAESAVR.[L]             | Match with other species                                                 |
| A4I980    | Putative copper-transporting ATPase-like protein | [R].IVQEAQNTKPSIQR.[A]        | 100% match with <i>Leishmania</i> spp.                                   |
| A4I9J4    | Uncharacterized protein                          | [R].EQVVVQLQREK.[G]           | 100% match with <i>Leishmania</i> spp.                                   |
| A4I9T5    | Uncharacterized protein                          | [R].SLIQLEADSK.[A]            | 100% match with <i>Leishmania</i> spp.                                   |
| A4IB79    | Putative DNA polymerase epsilon subunit b        | [R].MQGLSESELR.[D]            | 100% match with <i>Leishmania</i> spp.                                   |
| A4IBI2    | Uncharacterized protein                          | [K].DILAVTR.[I]               | 100% match with <i>Leishmania</i> spp.                                   |
| A4ID28    | Mitogen activated kinase-like protein            | [K].RGDALLK.[K]               | Match with other species                                                 |
| E9AGE5    | Uncharacterized protein                          | [K].KKMGYLGVELTAEEAALR.[A]    | 100% match with <i>Leishmania</i> spp.                                   |

Figure S1. Clinical signs of the CanL dogs. Clinical signs are divided into unspecific, more general clinical signs (lymphadenopathy, epistaxis, weight loss and cachexia) and more specific clinical signs compatible with CanL—dermatological lesions, ophthalmological lesions, muscular skeleton lesions and haematological abnormalities. NA—not available. Figure S2. Reactivity of sera from CanL confirmed cases and healthy dogs for (a) SPLA and (b) rK39 determined by ELISA. Coatings were done with 10 µg/mL for SPLA and 5 µg/mL rK39. Results are represented as the logarithm of the optical density at 492 nm normalized by the cut-off value for each antigen. The dashed lines represent the cut-off. Data was generated from the average of two independent assays.

Figure S3. (a)—Results of BCA (mg/mL), bead-based assay for FACS analysis with CD5L, CD71 and CD9 and respective controls (mfi) for fractions 3–8 obtained from SEC. Control—beads + Fractions 5 and 6 + secondary antibody.

Figure S4. Protein content–EV characterization based on the Mysev2018. Each line represents a protein, while the columns labelled with a number represent the individual samples. The presence of green (Healthy group) or red colour (CanL group) associated with individual proteins depicted in lines represents the detection of that protein in the sample with at least 2 unique peptides. Figure S5. Number of PSMs per unique peptides identified for the two groups, Healthy and CanL, using different pathogens databases: *L. infantum*, *P. falciparum* and *N. caninum*. Table S1. Canine proteins identified in each sample. Each sheet in the Excel document corresponds to a different sample (samples 1 to 19—healthy samples; 20 to 39—CanL samples). Each protein is associated with the Protein FDR Confidence, Uniprot accession number, peptides, PSMs and unique peptides. Table S2. Canine proteins that were identified in each group. Each sheet in the Excel document corresponds to a different group: Healthy, CanL, core proteome, Unique to Healthy and Unique to CanL. The different proteins are associated with the Uniprot accession number, peptides, PSMs and unique peptides. Table S3. Gene ontology (GO) enrichment analysis of the proteins present in different groups. Each sheet in the Excel document corresponds to a different group: Healthy, CanL, core proteome, Unique to Healthy and Unique to CanL. GO enrichment analysis shows terms significantly

enriched for biological processes, molecular function and cellular compartment, corresponding genes to each GO term and respective  $p$ -value. Table S4. List of proteins identified in the injection analysis. Confidence associated with the peptide identification, Uniprot accession number and respective peptides, PSMs and unique peptides identified in each protein. Abundance ratio (CanL/Healthy) e respective  $p$ -value. The presence of green (Healthy) or red (CanL group) colours associated with individual proteins represents the detection of that PSM in the injection (corresponding to a technical replicate). Number of injections associated with Healthy group, CanL group, total number of injections and difference between the two groups. Table S5. List of accession numbers, description, fold change and  $p$ -value associated with the proteins significantly altered abundance in CanL EVs and respective peptides, Peptide-Spectrum Matches (PSMs) and unique peptides identified in Healthy and CanL EVs. Table S6. List of *L. infantum* proteins identified in CanL dogs. Respective TriTrypDB and Uniprot accession number, description, peptide sequence identified and peptide blast result performed in NCBI as well as peptides, PSMs, unique peptides and the total number of dogs associated with each protein. Table S7. List of the *L. infantum* proteins found in more than one CanL sample. TriTrypDB accession number, Uniprot accession number, description and associated PSMs, unique peptides and peptide identification confidence, and corresponding the number of dogs in which the protein was identified. Table S8. List of *L. infantum* proteins identified in more than one CanL dog, and respective UniProt accession number, peptide sequence identified and peptide blast result performed in NCBI
