# Supplementary material for: Characterization and Proteomic Analysis of Plasma EVs Recovered from Healthy and Diseased Dogs with Canine Leishmaniosis
Source: Int J Mol Sci. 2023 Mar 13;24(6):5490. doi: 10.3390/ijms24065490 (PMC10056832; doi:10.3390/ijms24065490)
Supplement: Supplementary file 1 [file ijms-24-05490-s001.zip]

Archive with 7 entries (7 files):
- ijms-2208855-supplementary/Captions for tables S1, S2, S3, S4 and S6.pdf
- ijms-2208855-supplementary/ijms-2208855-supplementary materials.pdf
- ijms-2208855-supplementary/Table S1.xlsx
- ijms-2208855-supplementary/Table S2.xlsx
- ijms-2208855-supplementary/Table S3.xlsx
- ijms-2208855-supplementary/Table S4.xlsx
- ijms-2208855-supplementary/Table S6.xlsx
