# Supplementary material for: Characterization and Proteomic Analysis of Plasma EVs Recovered from Healthy and Diseased Dogs with Canine Leishmaniosis
Source: Int J Mol Sci. 2023 Mar 13;24(6):5490. doi: 10.3390/ijms24065490 (PMC10056832; doi:10.3390/ijms24065490)
Supplement: Supplementary file 1 [file ijms-24-05490-s001.zip › ijms-2208855-supplementary/Table S1.xlsx]

## Sheet: 1
Protein FDR Confidence	Accession	Description	Marked as	Peptides	PSMs	Unique Peptides
High	F1P8Z5	Apolipoprotein B OS=Canis lupus familiaris OX=9615 GN=APOB PE=4 SV=2	C_familiaris	50	542	171
High	E2R1P6	Spectrin alpha, erythrocytic 1 OS=Canis lupus familiaris OX=9615 GN=SPTA1 PE=3 SV=3	C_familiaris	77	1288	170
High	F1Q253	Spectrin beta chain OS=Canis lupus familiaris OX=9615 GN=SPTB PE=3 SV=3	C_familiaris	70	976	145
High	A0A5F4CG91	von Willebrand factor OS=Canis lupus familiaris OX=9615 GN=VWF PE=4 SV=1	C_familiaris	43	1186	115
High	F1PGM1	C3-beta-c OS=Canis lupus familiaris OX=9615 GN=C3 PE=4 SV=2	C_familiaris	73	1198	87
High	J9PBN6	Uncharacterized protein OS=Canis lupus familiaris OX=9615 GN=LOC477699 PE=3 SV=1	C_familiaris	69	1028	75
High	F6UME0	Uncharacterized protein OS=Canis lupus familiaris OX=9615 GN=LOC477699 PE=3 SV=1	C_familiaris	65	708	65
High	F1PWW0	Filamin A OS=Canis lupus familiaris OX=9615 GN=FLNA PE=3 SV=3	C_familiaris	34	107	59
High	F1PEU6	Hemicentin 2 OS=Canis lupus familiaris OX=9615 GN=HMCN2 PE=4 SV=3	C_familiaris	16	89	58
High	J9P430	Beta-1 metal-binding globulin OS=Canis lupus familiaris OX=9615 GN=TF PE=3 SV=1	C_familiaris	65	407	54
High	E2RK21	Uncharacterized protein OS=Canis lupus familiaris OX=9615 GN=CFH PE=4 SV=3	C_familiaris	57	211	49
High	E2RLQ9	15S Mg(2+)-ATPase p97 subunit OS=Canis lupus familiaris OX=9615 GN=VCP PE=3 SV=3	C_familiaris	63	143	46
High	F1PN98	Coagulation factor V OS=Canis lupus familiaris OX=9615 GN=F5 PE=3 SV=2	C_familiaris	24	105	45
High	F1PBL4	Fibrinogen alpha chain OS=Canis lupus familiaris OX=9615 GN=FGA PE=4 SV=2	C_familiaris	49	760	42
High	F1Q421	Plasminogen OS=Canis lupus familiaris OX=9615 GN=PLG PE=3 SV=2	C_familiaris	64	202	42
High	F1P707	Anaphylatoxin-like domain-containing protein OS=Canis lupus familiaris OX=9615 GN=LOC484960 PE=4 SV=3	C_familiaris	34	93	40
High	F1P7J4	Complement C5 OS=Canis lupus familiaris OX=9615 GN=C5 PE=4 SV=3	C_familiaris	31	92	36
High	A0A5F4C8H6	Uncharacterized protein OS=Canis lupus familiaris OX=9615 GN=FBN1 PE=3 SV=1	C_familiaris	18	62	36
High	Q2Z1P8	Anion exchange protein OS=Canis lupus familiaris OX=9615 GN=SLC4A1 PE=2 SV=1	C_familiaris	50	628	35
High	F6XYK7	Adducin 2 OS=Canis lupus familiaris OX=9615 GN=ADD2 PE=3 SV=1	C_familiaris	72	84	33
High	F1PGS2	Fibrinogen beta chain OS=Canis lupus familiaris OX=9615 GN=FGB PE=4 SV=2	C_familiaris	74	1245	32
High	F1PDJ5	Apolipoprotein A-I OS=Canis lupus familiaris OX=9615 GN=APOA1 PE=3 SV=1	C_familiaris	82	357	32
High	F1P8G0	Fibrinogen gamma chain OS=Canis lupus familiaris OX=9615 GN=FGG PE=4 SV=2	C_familiaris	79	866	31
High	E2QZQ1	Transferrin OS=Canis lupus familiaris OX=9615 GN=TF PE=3 SV=2	C_familiaris	62	113	31
High	A0A5F4BYK6	Tenascin C OS=Canis lupus familiaris OX=9615 GN=TNC PE=3 SV=1	C_familiaris	24	48	30
High	F1PD51	Erythrocyte membrane protein band 4.2 OS=Canis lupus familiaris OX=9615 GN=EPB42 PE=3 SV=3	C_familiaris	44	106	27
High	F1PSS8	Vitamin K-dependent protein S OS=Canis lupus familiaris OX=9615 GN=PROS1 PE=4 SV=3	C_familiaris	46	133	27
High	F6Y6T8	Uncharacterized protein OS=Canis lupus familiaris OX=9615 GN=PIGR PE=4 SV=2	C_familiaris	51	106	25
High	F1P903	Complement subcomponent C1r OS=Canis lupus familiaris OX=9615 GN=C1R PE=4 SV=2	C_familiaris	43	85	25
High	F1PG16	Uncharacterized protein OS=Canis lupus familiaris OX=9615 GN=CD5L PE=4 SV=2	C_familiaris	80	370	24
High	P18649	Apolipoprotein E OS=Canis lupus familiaris OX=9615 GN=APOE PE=1 SV=3	C_familiaris	64	264	24
High	A0A5F4BXN3	Actin-depolymerizing factor OS=Canis lupus familiaris OX=9615 GN=GSN PE=3 SV=1	C_familiaris	49	85	24
High	A0A5F4CNE2	Cartilage oligomeric matrix protein OS=Canis lupus familiaris OX=9615 GN=COMP PE=3 SV=1	C_familiaris	50	77	24
High	A0A5F4DEY2	Ceruloplasmin OS=Canis lupus familiaris OX=9615 GN=CP PE=3 SV=1	C_familiaris	34	60	24
High	J9NSF9	Activation peptide fragment 1 OS=Canis lupus familiaris OX=9615 GN=F2 PE=4 SV=2	C_familiaris	48	65	24
High	F1PBI6	Thrombospondin 1 OS=Canis lupus familiaris OX=9615 GN=THBS1 PE=3 SV=3	C_familiaris	24	52	24
High	E2RG01	Complement C7 OS=Canis lupus familiaris OX=9615 GN=C7 PE=3 SV=3	C_familiaris	38	45	24
High	A0A5F4CHN8	Thrombospondin 4 OS=Canis lupus familiaris OX=9615 GN=THBS4 PE=3 SV=1	C_familiaris	41	100	23
High	F1Q418	Inter-alpha-trypsin inhibitor heavy chain 1 OS=Canis lupus familiaris OX=9615 GN=ITIH1 PE=3 SV=2	C_familiaris	32	89	22
High	E2RS75	C3/C5 convertase OS=Canis lupus familiaris OX=9615 GN=CFB PE=4 SV=2	C_familiaris	38	58	22
High	E2R5W6	Gc-globulin OS=Canis lupus familiaris OX=9615 GN=GC PE=4 SV=3	C_familiaris	55	65	22
High	A0A5F4BY85	Glycosyl-phosphatidylinositol-specific phospholipase D OS=Canis lupus familiaris OX=9615 GN=GPLD1 PE=3 SV=1	C_familiaris	36	57	21
High	A0A5F4BS96	Complement C1s OS=Canis lupus familiaris OX=9615 GN=C1S PE=4 SV=1	C_familiaris	45	46	21
High	F1PEN6	Transferrin receptor protein 1 OS=Canis lupus familiaris OX=9615 GN=TFRC PE=3 SV=2	C_familiaris	28	49	21
High	J9NVC6	Immunoglobulin heavy constant mu OS=Canis lupus familiaris OX=9615 GN=IGHM PE=4 SV=2	C_familiaris	52	718	20
High	F1PG39	Inter-alpha-trypsin inhibitor heavy chain 2 OS=Canis lupus familiaris OX=9615 GN=ITIH2 PE=3 SV=3	C_familiaris	33	78	20
High	F1PKX3	Coagulation factor XIII A chain OS=Canis lupus familiaris OX=9615 GN=F13A1 PE=3 SV=2	C_familiaris	37	51	20
High	F1PGM9	Complement component 4 binding protein alpha OS=Canis lupus familiaris OX=9615 GN=C4BPA PE=4 SV=3	C_familiaris	68	848	18
High	H9GWY1	Inter-alpha-trypsin inhibitor heavy chain 4 OS=Canis lupus familiaris OX=9615 GN=ITIH4 PE=3 SV=3	C_familiaris	25	25	18
High	E2R0T6	Heat shock protein family A (Hsp70) member 8 OS=Canis lupus familiaris OX=9615 GN=HSPA8 PE=3 SV=1	C_familiaris	43	57	17
High	E2R4V3	Serpin family F member 2 OS=Canis lupus familiaris OX=9615 GN=SERPINF2 PE=3 SV=1	C_familiaris	44	40	17
High	F1PDQ2	Dematin actin binding protein OS=Canis lupus familiaris OX=9615 GN=DMTN PE=4 SV=3	C_familiaris	60	79	17
High	A0A5F4CIK5	Coagulation factor XIII B chain OS=Canis lupus familiaris OX=9615 GN=F13B PE=4 SV=1	C_familiaris	32	51	17
High	E2R141	Complement component 8 subunit beta OS=Canis lupus familiaris OX=9615 GN=C8B PE=3 SV=1	C_familiaris	39	34	17
High	E2RJY0	Potassium channel tetramerization domain containing 12 OS=Canis lupus familiaris OX=9615 GN=KCTD12 PE=4 SV=2	C_familiaris	58	71	16
High	A0A5S6DEE6	Clusterin OS=Canis lupus familiaris OX=9615 GN=CLU PE=3 SV=1	C_familiaris	34	54	16
High	E2QZN8	Pentraxin 3 OS=Canis lupus familiaris OX=9615 GN=PTX3 PE=4 SV=2	C_familiaris	60	44	16
High	P19006	Haptoglobin OS=Canis lupus familiaris OX=9615 GN=HP PE=1 SV=2	C_familiaris	52	49	16
High	A0A5F4CEZ2	Maltase-glucoamylase OS=Canis lupus familiaris OX=9615 GN=MGAM PE=3 SV=1	C_familiaris	13	23	16
High	E2RES2	Antithrombin-III OS=Canis lupus familiaris OX=9615 GN=SERPINC1 PE=3 SV=3	C_familiaris	47	89	15
High	E2R7A3	Complement factor I OS=Canis lupus familiaris OX=9615 GN=CFI PE=4 SV=3	C_familiaris	38	45	15
High	E2R5R9	UTP--glucose-1-phosphate uridylyltransferase OS=Canis lupus familiaris OX=9615 GN=UGP2 PE=3 SV=3	C_familiaris	37	26	15
High	F1PPG5	Integrin beta OS=Canis lupus familiaris OX=9615 GN=ITGB3 PE=3 SV=2	C_familiaris	24	34	15
High	F1PI01	Kell metallo-endopeptidase OS=Canis lupus familiaris OX=9615 GN=KEL PE=4 SV=3	C_familiaris	28	20	15
High	J9NZL6	Reelin OS=Canis lupus familiaris OX=9615 GN=RELN PE=3 SV=2	C_familiaris	6	22	15
High	E2QZ50	Adenylyl cyclase-associated protein OS=Canis lupus familiaris OX=9615 GN=CAP1 PE=3 SV=1	C_familiaris	37	36	14
High	A0A5F4CWL0	Galectin-3-binding protein OS=Canis lupus familiaris OX=9615 GN=CANT1 PE=4 SV=1	C_familiaris	22	32	14
High	E2R109	Complement C8 alpha chain OS=Canis lupus familiaris OX=9615 GN=C8A PE=3 SV=1	C_familiaris	39	35	14
High	A0A5F4CZM1	Sulfhydryl oxidase OS=Canis lupus familiaris OX=9615 GN=QSOX1 PE=3 SV=1	C_familiaris	26	27	14
High	E2QXQ9	Tropomodulin 1 OS=Canis lupus familiaris OX=9615 GN=TMOD1 PE=4 SV=1	C_familiaris	47	32	14
High	E2RMF9	Serpin family A member 5 OS=Canis lupus familiaris OX=9615 GN=SERPINA5 PE=3 SV=2	C_familiaris	36	26	14
High	P33703	Beta-2-glycoprotein 1 OS=Canis lupus familiaris OX=9615 GN=APOH PE=2 SV=1	C_familiaris	52	142	13
High	E2R2F7	Sex hormone binding globulin OS=Canis lupus familiaris OX=9615 GN=SHBG PE=4 SV=1	C_familiaris	48	44	13
High	P50551	Vasodilator-stimulated phosphoprotein OS=Canis lupus familiaris OX=9615 GN=VASP PE=1 SV=3	C_familiaris	47	41	13
High	A0A5F4D4F1	Moesin OS=Canis lupus familiaris OX=9615 GN=MSN PE=4 SV=1	C_familiaris	41	32	13
High	F1PRH1	ATP binding cassette subfamily B member 6 OS=Canis lupus familiaris OX=9615 GN=ABCB6 PE=4 SV=2	C_familiaris	19	20	13
High	E2RT60	Integrin beta OS=Canis lupus familiaris OX=9615 GN=ITGB1 PE=3 SV=3	C_familiaris	20	26	13
High	E2RH18	Complement factor properdin OS=Canis lupus familiaris OX=9615 GN=CFP PE=4 SV=1	C_familiaris	25	70	12
High	H9GWG4	Inter-alpha-trypsin inhibitor heavy chain 3 OS=Canis lupus familiaris OX=9615 GN=ITIH3 PE=3 SV=3	C_familiaris	29	47	12
High	F1PF02	Proteasome subunit beta OS=Canis lupus familiaris OX=9615 GN=PSMB1 PE=3 SV=3	C_familiaris	59	49	12
High	J9P7F7	Ficolin 1 OS=Canis lupus familiaris OX=9615 GN=FCN1 PE=3 SV=1	C_familiaris	41	97	12
High	E2R3R2	Proteasome subunit beta OS=Canis lupus familiaris OX=9615 GN=PSMB5 PE=3 SV=1	C_familiaris	53	39	12
High	A0A5F4CEP4	Fetuin B OS=Canis lupus familiaris OX=9615 GN=FETUB PE=4 SV=1	C_familiaris	48	41	12
High	A0A5F4CZY7	Proteasome subunit alpha type OS=Canis lupus familiaris OX=9615 GN=PSMA1 PE=3 SV=1	C_familiaris	54	51	12
High	A0A5F4CLP4	Uncharacterized protein OS=Canis lupus familiaris OX=9615 GN=LOC609365 PE=4 SV=1	C_familiaris	42	34	12
High	A0A5F4CR91	Basigin OS=Canis lupus familiaris OX=9615 GN=BSG PE=4 SV=1	C_familiaris	42	37	12
High	E2RAF1	Creatine kinase OS=Canis lupus familiaris OX=9615 GN=CKMT1A PE=3 SV=1	C_familiaris	41	19	12
High	J9P416	Tenascin N OS=Canis lupus familiaris OX=9615 GN=TNN PE=4 SV=1	C_familiaris	20	16	12
High	A0A5F4C9D6	Flotillin OS=Canis lupus familiaris OX=9615 GN=DHRS13 PE=3 SV=1	C_familiaris	36	18	12
High	F1PR31	Collagen type VI alpha 3 chain OS=Canis lupus familiaris OX=9615 GN=COL6A3 PE=4 SV=3	C_familiaris	5	13	12
High	J9P9J6	Uncharacterized protein OS=Canis lupus familiaris OX=9615 PE=4 SV=2	C_familiaris	45	208	11
High	F1PZC6	Histidine rich glycoprotein OS=Canis lupus familiaris OX=9615 GN=HRG PE=4 SV=3	C_familiaris	22	32	11
High	A0A5F4BNY8	Thrombospondin 3 OS=Canis lupus familiaris OX=9615 GN=THBS3 PE=3 SV=1	C_familiaris	22	20	11
High	F1PYX9	Serpin family G member 1 OS=Canis lupus familiaris OX=9615 GN=SERPING1 PE=3 SV=3	C_familiaris	30	28	11
High	F1PZR4	Amyloid beta precursor protein binding family B member 1 OS=Canis lupus familiaris OX=9615 GN=APBB1 PE=4 SV=3	C_familiaris	25	31	11
High	J9P4J8	Complement factor H related 5 OS=Canis lupus familiaris OX=9615 GN=CFHR5 PE=4 SV=2	C_familiaris	28	23	11
High	A0A5F4CTD0	Alpha-1-B glycoprotein OS=Canis lupus familiaris OX=9615 GN=A1BG PE=4 SV=1	C_familiaris	29	36	11
High	J9PAA4	Carboxypeptidase N subunit 2 OS=Canis lupus familiaris OX=9615 GN=CPN2 PE=4 SV=1	C_familiaris	32	23	11
High	F1PNR5	Coagulation factor XI OS=Canis lupus familiaris OX=9615 GN=F11 PE=3 SV=3	C_familiaris	12	26	11
High	F1PSC2	Talin 1 OS=Canis lupus familiaris OX=9615 GN=TLN1 PE=4 SV=3	C_familiaris	6	15	11
High	E2QUY9	ADAM metallopeptidase with thrombospondin type 1 motif 13 OS=Canis lupus familiaris OX=9615 GN=ADAMTS13 PE=4 SV=2	C_familiaris	11	21	11
High	A0A5F4CWM9	Myosin-9 OS=Canis lupus familiaris OX=9615 GN=MYH9 PE=3 SV=1	C_familiaris	8	14	11
High	A0A5F4CNZ1	Complement component C6 OS=Canis lupus familiaris OX=9615 GN=C6 PE=3 SV=1	C_familiaris	15	18	11
High	J9P315	LDL receptor related protein 1 OS=Canis lupus familiaris OX=9615 GN=LRP1 PE=3 SV=2	C_familiaris	3	14	11
High	F1PHD0	Carboxyl ester lipase OS=Canis lupus familiaris OX=9615 GN=CEL PE=3 SV=2	C_familiaris	16	22	11
High	A0A5F4DDG2	Myristoylated alanine rich protein kinase C substrate OS=Canis lupus familiaris OX=9615 GN=MARCKS PE=3 SV=1	C_familiaris	48	35	10
High	F1PP29	Uncharacterized protein OS=Canis lupus familiaris OX=9615 PE=4 SV=2	C_familiaris	26	37	10
High	E2R8K8	Uncharacterized protein OS=Canis lupus familiaris OX=9615 GN=LOC490399 PE=4 SV=3	C_familiaris	30	40	10
High	F1PAF3	Hepatocyte growth factor activator OS=Canis lupus familiaris OX=9615 GN=HGFAC PE=4 SV=2	C_familiaris	20	17	10
High	E2RMN2	Proteasome subunit alpha type OS=Canis lupus familiaris OX=9615 GN=PSMA6 PE=3 SV=1	C_familiaris	48	29	10
High	E2RSI6	FERM domain-containing protein OS=Canis lupus familiaris OX=9615 GN=EZR PE=4 SV=1	C_familiaris	28	27	10
High	P38400	Guanine nucleotide-binding protein G(i) subunit alpha-2 OS=Canis lupus familiaris OX=9615 GN=GNAI2 PE=2 SV=2	C_familiaris	39	14	10
High	F1P8T1	Angiopoietin like 6 OS=Canis lupus familiaris OX=9615 GN=ANGPTL6 PE=4 SV=3	C_familiaris	20	27	10
High	F1PW10	Transforming growth factor-beta-induced protein ig-h3 OS=Canis lupus familiaris OX=9615 GN=TGFBI PE=4 SV=3	C_familiaris	25	12	10
High	E2QWN7	Lymphocyte cytosolic protein 1 OS=Canis lupus familiaris OX=9615 GN=LCP1 PE=4 SV=2	C_familiaris	22	16	10
High	E2QZ19	Serum albumin OS=Canis lupus familiaris OX=9615 GN=AFP PE=4 SV=2	C_familiaris	21	14	10
High	J9P4L3	Arachidonate 15-lipoxygenase OS=Canis lupus familiaris OX=9615 GN=ALOX15 PE=3 SV=1	C_familiaris	20	14	10
High	E2QSE3	Flotillin OS=Canis lupus familiaris OX=9615 GN=FLOT1 PE=3 SV=1	C_familiaris	30	14	10
High	F1Q1K9	Hyaluronan binding protein 2 OS=Canis lupus familiaris OX=9615 GN=HABP2 PE=4 SV=3	C_familiaris	28	19	10
High	F1PXD6	Proteoglycan 4 OS=Canis lupus familiaris OX=9615 GN=PRG4 PE=4 SV=3	C_familiaris	15	28	10
High	F1PZA0	Delta-aminolevulinic acid dehydratase OS=Canis lupus familiaris OX=9615 GN=ALAD PE=3 SV=2	C_familiaris	45	16	10
High	E2R478	Neuronal pentraxin 1 OS=Canis lupus familiaris OX=9615 GN=NPTX1 PE=4 SV=1	C_familiaris	24	15	10
High	F1PHQ0	Clathrin heavy chain OS=Canis lupus familiaris OX=9615 GN=CLTC PE=3 SV=3	C_familiaris	8	12	10
High	J9NUI6	Alpha-1-microglobulin OS=Canis lupus familiaris OX=9615 GN=AMBP PE=3 SV=1	C_familiaris	29	37	9
High	E2QWR0	Surfactant protein D OS=Canis lupus familiaris OX=9615 GN=SFTPD PE=3 SV=1	C_familiaris	33	30	9
High	E2RPW3	Paraoxonase 3 OS=Canis lupus familiaris OX=9615 GN=PON3 PE=3 SV=3	C_familiaris	45	25	9
High	F6X7V8	Erythroblast membrane associated protein OS=Canis lupus familiaris OX=9615 GN=ERMAP PE=3 SV=2	C_familiaris	22	19	9
High	E2QX17	Proteasome subunit beta OS=Canis lupus familiaris OX=9615 GN=PSMB3 PE=3 SV=1	C_familiaris	50	23	9
High	E2RL88	Integrin subunit alpha 6 OS=Canis lupus familiaris OX=9615 GN=ITGA6 PE=3 SV=2	C_familiaris	12	10	9
High	E2RQF8	Extracellular matrix protein 1 OS=Canis lupus familiaris OX=9615 GN=ECM1 PE=4 SV=3	C_familiaris	21	18	9
High	A0A5S6CLE1	Catalase OS=Canis lupus familiaris OX=9615 GN=CAT PE=3 SV=1	C_familiaris	22	14	9
High	F1PNY2	Immunoglobulin kappa constant OS=Canis lupus familiaris OX=9615 GN=IGKC PE=4 SV=3	C_familiaris	93	291	8
High	E2RBR6	Proteasome subunit beta OS=Canis lupus familiaris OX=9615 GN=PSMB4 PE=3 SV=1	C_familiaris	48	30	8
High	J9P889	Collagen type VI alpha 1 chain OS=Canis lupus familiaris OX=9615 GN=COL6A1 PE=4 SV=2	C_familiaris	18	22	8
High	J9P1G2	Adiponectin A OS=Canis lupus familiaris OX=9615 GN=C1QB PE=4 SV=1	C_familiaris	41	79	8
High	E2RPC6	Proteasome subunit beta OS=Canis lupus familiaris OX=9615 GN=PSMB7 PE=2 SV=3	C_familiaris	49	27	8
High	E2QX53	Glucosamine-6-phosphate isomerase OS=Canis lupus familiaris OX=9615 GN=GNPDA1 PE=3 SV=1	C_familiaris	49	26	8
High	E2QW60	Lectin, mannose binding 1 OS=Canis lupus familiaris OX=9615 GN=LMAN1 PE=4 SV=2	C_familiaris	28	22	8
High	F1PIC7	78 kDa glucose-regulated protein OS=Canis lupus familiaris OX=9615 GN=HSPA5 PE=3 SV=2	C_familiaris	21	16	8
High	A0A5F4CS96	Tubulin alpha chain OS=Canis lupus familiaris OX=9615 GN=LOC106557476 PE=3 SV=1	C_familiaris	33	15	8
High	F1PGY1	Heat shock protein 90 alpha family class A member 1 OS=Canis lupus familiaris OX=9615 GN=HSP90AA1 PE=3 SV=3	C_familiaris	23	16	8
High	F1Q3I5	Collagen alpha-1(I) chain OS=Canis lupus familiaris OX=9615 GN=COL1A1 PE=4 SV=3	C_familiaris	7	14	8
High	A0A5F4C3L7	Milk fat globule-EGF factor 8 protein OS=Canis lupus familiaris OX=9615 GN=MFGE8 PE=4 SV=1	C_familiaris	22	15	8
High	F1PTI2	Uncharacterized protein OS=Canis lupus familiaris OX=9615 GN=BTNL10 PE=3 SV=3	C_familiaris	19	12	8
High	E2R1N7	Prenylcysteine oxidase 1 OS=Canis lupus familiaris OX=9615 GN=PCYOX1 PE=3 SV=1	C_familiaris	19	15	8
High	A0A5F4C7K2	Uncharacterized protein OS=Canis lupus familiaris OX=9615 GN=VTN PE=4 SV=1	C_familiaris	20	23	8
High	F1P8N6	Endoplasmin OS=Canis lupus familiaris OX=9615 GN=HSP90B1 PE=3 SV=1	C_familiaris	13	10	8
High	A0A5F4DH03	Coagulation factor X OS=Canis lupus familiaris OX=9615 GN=F10 PE=4 SV=1	C_familiaris	23	10	8
High	A0A5F4DAV6	ATP binding cassette subfamily C member 4 OS=Canis lupus familiaris OX=9615 GN=ABCC4 PE=4 SV=1	C_familiaris	8	9	8
High	E2R7E8	Acyl-peptide hydrolase OS=Canis lupus familiaris OX=9615 GN=APEH PE=4 SV=2	C_familiaris	15	11	8
High	J9P064	Collectin subfamily member 10 OS=Canis lupus familiaris OX=9615 GN=COLEC10 PE=4 SV=1	C_familiaris	38	19	8
High	E2RLN1	Serpin family D member 1 OS=Canis lupus familiaris OX=9615 GN=SERPIND1 PE=3 SV=2	C_familiaris	16	14	8
High	A0A5S6CZL3	Apolipoprotein A-IV OS=Canis lupus familiaris OX=9615 GN=APOA4 PE=3 SV=1	C_familiaris	56	165	7
High	A0A5F4CWA9	Proteasome subunit alpha type OS=Canis lupus familiaris OX=9615 GN=PSMA2 PE=3 SV=1	C_familiaris	34	23	7
High	E2R8A7	Collectin subfamily member 11 OS=Canis lupus familiaris OX=9615 GN=COLEC11 PE=4 SV=3	C_familiaris	23	26	7
High	F1PCE5	Serpin family A member 1 OS=Canis lupus familiaris OX=9615 GN=SERPINA1 PE=3 SV=3	C_familiaris	20	48	7
High	E2RNG3	Carboxypeptidase N subunit 1 OS=Canis lupus familiaris OX=9615 GN=CPN1 PE=3 SV=2	C_familiaris	29	18	7
High	J9NYG8	Complement component 4 binding protein beta OS=Canis lupus familiaris OX=9615 GN=C4BPB PE=4 SV=1	C_familiaris	30	19	7
High	F1Q057	Peroxidase OS=Canis lupus familiaris OX=9615 GN=PXDN PE=4 SV=3	C_familiaris	8	12	7
High	E2QW82	Matrix metallopeptidase 19 OS=Canis lupus familiaris OX=9615 GN=MMP19 PE=3 SV=3	C_familiaris	20	9	7
High	F2Z4Q7	Serpin family F member 1 OS=Canis lupus familiaris OX=9615 GN=SERPINF1 PE=3 SV=1	C_familiaris	27	10	7
High	A0A5F4CED7	Plasma retinol-binding protein OS=Canis lupus familiaris OX=9615 GN=RBP4 PE=3 SV=1	C_familiaris	25	17	7
High	A0A5F4CW76	ATP synthase subunit beta OS=Canis lupus familiaris OX=9615 GN=ATP5F1B PE=3 SV=1	C_familiaris	16	12	7
High	F1Q317	Galectin OS=Canis lupus familiaris OX=9615 GN=LGALS9 PE=4 SV=1	C_familiaris	25	17	7
High	F1PRU9	Integrin subunit alpha 2b OS=Canis lupus familiaris OX=9615 GN=ITGA2B PE=3 SV=2	C_familiaris	8	11	7
High	F1P7P3	F-actin-capping protein subunit alpha OS=Canis lupus familiaris OX=9615 GN=CAPZA1 PE=3 SV=2	C_familiaris	46	11	7
High	A0A5F4DBF8	V-type proton ATPase subunit a OS=Canis lupus familiaris OX=9615 GN=ATP6V0A1 PE=3 SV=1	C_familiaris	11	11	7
High	A0A5F4DKI9	Coagulation factor VIII OS=Canis lupus familiaris OX=9615 GN=F8 PE=3 SV=1	C_familiaris	4	11	7
High	A0A5F4CP88	Protein-tyrosine-phosphatase OS=Canis lupus familiaris OX=9615 GN=PTPRC PE=4 SV=1	C_familiaris	7	10	7
High	E2RKR4	Proteasome subunit alpha type OS=Canis lupus familiaris OX=9615 GN=PSMA3 PE=3 SV=2	C_familiaris	33	18	7
High	F1PXX1	EH domain containing 3 OS=Canis lupus familiaris OX=9615 GN=EHD3 PE=4 SV=2	C_familiaris	14	8	7
High	A0A5F4CKE9	Microtubule-associated protein OS=Canis lupus familiaris OX=9615 GN=MAP4 PE=4 SV=1	C_familiaris	5	9	7
High	A0A5F4D8T6	AIR carboxylase OS=Canis lupus familiaris OX=9615 GN=PAICS PE=3 SV=1	C_familiaris	5	11	7
High	A0A5F4DA08	Oncoprotein induced transcript 3 OS=Canis lupus familiaris OX=9615 GN=OIT3 PE=4 SV=1	C_familiaris	17	10	7
High	F1PBJ3	Uncharacterized protein OS=Canis lupus familiaris OX=9615 GN=LMNA PE=3 SV=2	C_familiaris	11	7	7
High	E2RE76	Apolipoprotein A-IV OS=Canis lupus familiaris OX=9615 GN=APOA4 PE=3 SV=2	C_familiaris	56	146	6
High	F1PQ85	Mannan binding lectin serine peptidase 1 OS=Canis lupus familiaris OX=9615 GN=MASP1 PE=4 SV=3	C_familiaris	29	43	6
High	J9P983	Exostosin like glycosyltransferase 2 OS=Canis lupus familiaris OX=9615 GN=EXTL2 PE=4 SV=2	C_familiaris	38	35	6
High	Q5W416	Proteasome subunit beta type-8 OS=Canis lupus familiaris OX=9615 GN=PSMB8 PE=1 SV=1	C_familiaris	33	16	6
High	F1PKW7	Tyrosine 3-monooxygenase/tryptophan 5-monooxygenase activation protein beta OS=Canis lupus familiaris OX=9615 GN=YWHAB PE=3 SV=3	C_familiaris	48	16	6
High	A0A5F4D0M8	Calpain 5 OS=Canis lupus familiaris OX=9615 GN=CAPN5 PE=3 SV=1	C_familiaris	14	14	6
High	J9JHH5	Joining chain of multimeric IgA and IgM OS=Canis lupus familiaris OX=9615 GN=JCHAIN PE=4 SV=1	C_familiaris	38	36	6
High	J9P028	Glutathione peroxidase OS=Canis lupus familiaris OX=9615 GN=GPX3 PE=3 SV=2	C_familiaris	32	21	6
High	E2RNL3	Peroxiredoxin 4 OS=Canis lupus familiaris OX=9615 GN=PRDX4 PE=4 SV=2	C_familiaris	34	14	6
High	A0A5F4DKK2	Attractin OS=Canis lupus familiaris OX=9615 GN=ATRN PE=4 SV=1	C_familiaris	7	12	6
High	E2R4H4	Proteasome subunit alpha type OS=Canis lupus familiaris OX=9615 GN=PSMA5 PE=3 SV=3	C_familiaris	39	13	6
High	F1PQN5	Cofilin, non-muscle isoform OS=Canis lupus familiaris OX=9615 GN=CFL1 PE=3 SV=3	C_familiaris	45	16	6
High	A0A5F4BQH7	Chromosome 9 C17orf99 homolog OS=Canis lupus familiaris OX=9615 GN=C9H17orf99 PE=4 SV=1	C_familiaris	22	12	6
High	F1PLR6	Bridging integrator 1 OS=Canis lupus familiaris OX=9615 GN=BIN1 PE=3 SV=3	C_familiaris	12	9	6
High	J9NWG4	C-type lectin domain-containing protein OS=Canis lupus familiaris OX=9615 GN=MBL2 PE=4 SV=2	C_familiaris	26	32	6
High	F1PDY8	Carbonic anhydrase OS=Canis lupus familiaris OX=9615 GN=CA2 PE=3 SV=3	C_familiaris	30	10	6
High	F1PH87	Serpin family A member 3 OS=Canis lupus familiaris OX=9615 GN=SERPINA3 PE=3 SV=3	C_familiaris	20	15	6
High	A0A5F4CUH8	Golgi membrane protein 1 OS=Canis lupus familiaris OX=9615 GN=GOLM1 PE=3 SV=1	C_familiaris	21	11	6
High	A0A5S6DDK1	Ferritin OS=Canis lupus familiaris OX=9615 GN=FTH1 PE=3 SV=1	C_familiaris	32	14	6
High	E2RD86	Protein disulfide-isomerase OS=Canis lupus familiaris OX=9615 GN=PDIA3 PE=3 SV=1	C_familiaris	15	9	6
High	A0A5F4CKY1	A-kinase anchoring protein 12 OS=Canis lupus familiaris OX=9615 GN=AKAP12 PE=4 SV=1	C_familiaris	5	6	6
High	J9JHN1	RAB11B, member RAS oncogene family OS=Canis lupus familiaris OX=9615 GN=RAB11B PE=4 SV=1	C_familiaris	35	13	6
High	E2QSZ5	Coronin OS=Canis lupus familiaris OX=9615 GN=CORO1A PE=3 SV=1	C_familiaris	15	12	6
High	A0A5F4C710	Heparan sulfate proteoglycan 2 OS=Canis lupus familiaris OX=9615 GN=HSPG2 PE=4 SV=1	C_familiaris	2	8	6
High	J9P5P9	Apolipoprotein B receptor OS=Canis lupus familiaris OX=9615 GN=APOBR PE=4 SV=1	C_familiaris	8	7	6
High	A0A5F4CJL8	Sushi, von Willebrand factor type A, EGF and pentraxin domain containing 1 OS=Canis lupus familiaris OX=9615 GN=SVEP1 PE=4 SV=1	C_familiaris	3	7	6
High	J9P7E1	Band 4.1 OS=Canis lupus familiaris OX=9615 GN=EPB41 PE=4 SV=2	C_familiaris	43	200	5
High	F1PFM6	Collagen type VI alpha 1 chain OS=Canis lupus familiaris OX=9615 GN=COL6A1 PE=4 SV=2	C_familiaris	17	20	5
High	E2RJC2	Complement C1q C chain OS=Canis lupus familiaris OX=9615 GN=C1QC PE=4 SV=2	C_familiaris	26	63	5
High	A0A0B4J198	Adiponectin D OS=Canis lupus familiaris OX=9615 GN=EIF4A2 PE=4 SV=2	C_familiaris	24	70	5
High	F1PBL1	14_3_3 domain-containing protein OS=Canis lupus familiaris OX=9615 GN=YWHAZ PE=3 SV=3	C_familiaris	39	13	5
High	A0A5F4C0D1	Complement C1q subcomponent subunit A OS=Canis lupus familiaris OX=9615 GN=C1QA PE=4 SV=1	C_familiaris	27	44	5
High	F1PNS6	Peptidase D OS=Canis lupus familiaris OX=9615 GN=PEPD PE=3 SV=3	C_familiaris	16	11	5
High	E2R5U8	Transthyretin OS=Canis lupus familiaris OX=9615 GN=TTR PE=3 SV=1	C_familiaris	46	10	5
High	E2R516	Synaptosomal-associated protein OS=Canis lupus familiaris OX=9615 GN=SNAP23 PE=3 SV=1	C_familiaris	36	18	5
High	E2QUU5	60 kDa chaperonin OS=Canis lupus familiaris OX=9615 GN=HSPD1 PE=3 SV=2	C_familiaris	12	6	5
High	F1PPL9	C1q domain-containing protein OS=Canis lupus familiaris OX=9615 GN=C1QTNF3 PE=4 SV=3	C_familiaris	22	15	5
High	E2RQC0	C-type lectin domain family 3 member A OS=Canis lupus familiaris OX=9615 GN=CLEC3A PE=4 SV=1	C_familiaris	33	5	5
High	F1P679	Actin-like protein 3 OS=Canis lupus familiaris OX=9615 GN=ACTR3 PE=3 SV=2	C_familiaris	20	6	5
High	J9NX65	Uncharacterized protein OS=Canis lupus familiaris OX=9615 GN=SBSN PE=4 SV=2	C_familiaris	21	6	5
High	A0A5F4CP02	Pyruvate kinase OS=Canis lupus familiaris OX=9615 GN=PKM PE=3 SV=1	C_familiaris	14	6	5
High	F1PBT3	Fructose-bisphosphate aldolase OS=Canis lupus familiaris OX=9615 GN=ALDOA PE=3 SV=3	C_familiaris	16	8	5
High	F1P7S2	EH domain binding protein 1 like 1 OS=Canis lupus familiaris OX=9615 GN=EHBP1L1 PE=4 SV=3	C_familiaris	5	7	5
High	F1PYM4	Insulin like growth factor binding protein acid labile subunit OS=Canis lupus familiaris OX=9615 GN=IGFALS PE=4 SV=2	C_familiaris	11	7	5
High	E2QVU9	Biliverdin reductase B OS=Canis lupus familiaris OX=9615 GN=BLVRB PE=4 SV=1	C_familiaris	33	8	5
High	A0A5F4CZ37	Monocarboxylate transporter 2 OS=Canis lupus familiaris OX=9615 GN=SLC16A7 PE=3 SV=1	C_familiaris	11	16	5
High	F1Q094	Platelet-activating factor acetylhydrolase OS=Canis lupus familiaris OX=9615 GN=PLA2G7 PE=4 SV=1	C_familiaris	13	6	5
High	F1P8B4	Calnexin OS=Canis lupus familiaris OX=9615 GN=CANX PE=3 SV=2	C_familiaris	10	7	5
High	J9P7X2	Thy-1 antigen OS=Canis lupus familiaris OX=9615 GN=THY1 PE=4 SV=1	C_familiaris	38	8	5
High	E2RS79	C3/C5 convertase OS=Canis lupus familiaris OX=9615 GN=C2 PE=4 SV=2	C_familiaris	7	5	5
High	E2RFV9	Complement C9 OS=Canis lupus familiaris OX=9615 GN=C9 PE=3 SV=3	C_familiaris	9	9	5
High	J9PAD1	C4a anaphylatoxin OS=Canis lupus familiaris OX=9615 PE=4 SV=2	C_familiaris	60	280	4
High	F2Z4Q6	Serum albumin OS=Canis lupus familiaris OX=9615 GN=AFP PE=4 SV=2	C_familiaris	73	1324	4
High	Q6Q7P4	Protein 4.1 OS=Canis lupus familiaris OX=9615 GN=EPB41 PE=2 SV=1	C_familiaris	48	204	4
High	A0A5F4BYJ5	Uncharacterized protein OS=Canis lupus familiaris OX=9615 PE=4 SV=1	C_familiaris	64	559	4
High	Q28259	Glyceraldehyde-3-phosphate dehydrogenase OS=Canis lupus familiaris OX=9615 GN=GAPDH PE=2 SV=3	C_familiaris	37	22	4
High	E2QUV3	Alpha-2-HS-glycoprotein OS=Canis lupus familiaris OX=9615 GN=AHSG PE=4 SV=2	C_familiaris	29	21	4
High	J9NY02	Ig-like domain-containing protein OS=Canis lupus familiaris OX=9615 PE=4 SV=2	C_familiaris	52	114	4
High	A0A5F4C5A8	Ig-like domain-containing protein OS=Canis lupus familiaris OX=9615 PE=4 SV=1	C_familiaris	30	72	4
High	A0A5F4DER9	Aquaporin-1 OS=Canis lupus familiaris OX=9615 GN=AQP1 PE=3 SV=1	C_familiaris	18	19	4
High	F1PUB5	Proteasome subunit alpha 7 OS=Canis lupus familiaris OX=9615 GN=PSMA7 PE=3 SV=3	C_familiaris	44	27	4
High	F1PNV5	Coagulation factor XI OS=Canis lupus familiaris OX=9615 GN=F11 PE=4 SV=3	C_familiaris	13	12	4
High	E2RPB8	C-type lectin domain family 3 member B OS=Canis lupus familiaris OX=9615 GN=CLEC3B PE=4 SV=3	C_familiaris	39	7	4
High	Q3BCQ6	Rh antigen-like protein OS=Canis lupus familiaris OX=9615 GN=Rh30 PE=2 SV=1	C_familiaris	13	14	4
High	A0A5F4D3V5	Tubulin beta 1 class VI OS=Canis lupus familiaris OX=9615 GN=TUBB1 PE=3 SV=1	C_familiaris	12	8	4
High	A0A5F4D0K4	Bridging integrator 2 OS=Canis lupus familiaris OX=9615 GN=BIN2 PE=4 SV=1	C_familiaris	14	6	4
High	E2REF3	Solute carrier family 14 member 1 OS=Canis lupus familiaris OX=9615 GN=SLC14A1 PE=3 SV=3	C_familiaris	10	16	4
High	Q7YQC6	Heat shock 70 kDa protein 1 OS=Canis lupus familiaris OX=9615 GN=HSPA1 PE=2 SV=1	C_familiaris	11	10	4
High	E2QXA6	Calpain inhibitor OS=Canis lupus familiaris OX=9615 GN=CAST PE=3 SV=3	C_familiaris	8	6	4
High	E2RQ71	Apolipoprotein M OS=Canis lupus familiaris OX=9615 GN=APOM PE=3 SV=2	C_familiaris	26	7	4
High	E2QSF4	Tubulin beta chain OS=Canis lupus familiaris OX=9615 GN=TUBB PE=3 SV=1	C_familiaris	18	8	4
High	L7N0I1	Uncharacterized protein OS=Canis lupus familiaris OX=9615 GN=MYL12B PE=4 SV=1	C_familiaris	35	6	4
High	A0A5F4DGD5	Ig-like domain-containing protein OS=Canis lupus familiaris OX=9615 PE=4 SV=1	C_familiaris	34	21	4
High	A0A5F4BQ47	Phospholipid transfer protein OS=Canis lupus familiaris OX=9615 GN=PLTP PE=3 SV=1	C_familiaris	12	7	4
High	F1PIF2	Cathepsin X OS=Canis lupus familiaris OX=9615 GN=CTSZ PE=3 SV=3	C_familiaris	22	6	4
High	E2RK64	Fermitin family member 3 OS=Canis lupus familiaris OX=9615 GN=FERMT3 PE=3 SV=2	C_familiaris	8	5	4
High	F1P6D7	Integrin-associated protein OS=Canis lupus familiaris OX=9615 GN=CD47 PE=4 SV=3	C_familiaris	13	10	4
High	A0A5F4CAZ7	Sodium/potassium-transporting ATPase subunit alpha OS=Canis lupus familiaris OX=9615 GN=ATP1A1 PE=3 SV=1	C_familiaris	6	4	4
High	F6UZV8	Calcium-activated neutral proteinase 1 OS=Canis lupus familiaris OX=9615 GN=CAPN1 PE=3 SV=2	C_familiaris	8	5	4
High	P18067	Ras-related protein Rab-7a OS=Canis lupus familiaris OX=9615 GN=RAB7A PE=1 SV=1	C_familiaris	23	6	4
High	F1PW12	Coproporphyrinogen oxidase OS=Canis lupus familiaris OX=9615 GN=CPOX PE=3 SV=3	C_familiaris	16	5	4
High	E2R0P3	Isochorismatase domain containing 1 OS=Canis lupus familiaris OX=9615 GN=ISOC1 PE=3 SV=2	C_familiaris	29	7	4
High	F1PDG4	Uncharacterized protein OS=Canis lupus familiaris OX=9615 GN=UBB PE=4 SV=2	C_familiaris	56	14	4
High	F1Q432	Tenascin XB OS=Canis lupus familiaris OX=9615 GN=TNXB PE=3 SV=3	C_familiaris	2	6	4
High	E2R0B6	Proteasome subunit beta OS=Canis lupus familiaris OX=9615 GN=PSMB6 PE=3 SV=1	C_familiaris	20	9	4
High	A0A5F4CK68	Versican OS=Canis lupus familiaris OX=9615 GN=VCAN PE=3 SV=1	C_familiaris	10	6	4
High	A0A5F4D3V6	Integrin beta OS=Canis lupus familiaris OX=9615 GN=ITGB2 PE=3 SV=1	C_familiaris	6	4	4
High	F1PQS3	F-actin-capping protein subunit beta OS=Canis lupus familiaris OX=9615 GN=CAPZB PE=3 SV=2	C_familiaris	13	6	4
High	A0A5F4C8G1	Ras suppressor protein 1 OS=Canis lupus familiaris OX=9615 GN=RSU1 PE=4 SV=1	C_familiaris	16	7	4
High	F1PR54	Uncharacterized protein OS=Canis lupus familiaris OX=9615 GN=LTF PE=3 SV=1	C_familiaris	7	6	4
High	A0A5F4DJ87	Protein disulfide-isomerase OS=Canis lupus familiaris OX=9615 GN=P4HB PE=3 SV=1	C_familiaris	8	4	4
High	P62825	GTP-binding nuclear protein Ran OS=Canis lupus familiaris OX=9615 GN=RAN PE=1 SV=3	C_familiaris	20	7	4
High	P56595	Apolipoprotein C-I OS=Canis lupus familiaris OX=9615 GN=APOC1 PE=1 SV=1	C_familiaris	32	10	4
High	A0A5F4BNP2	Uncharacterized protein OS=Canis lupus familiaris OX=9615 PE=4 SV=1	C_familiaris	56	475	3
High	P60524	Hemoglobin subunit beta OS=Canis lupus familiaris OX=9615 GN=HBB PE=1 SV=1	C_familiaris	83	185	3
High	F2Z4N7	Actin alpha cardiac muscle 1 OS=Canis lupus familiaris OX=9615 GN=ACTC1 PE=3 SV=2	C_familiaris	37	94	3
High	A7VLI5	Glycophorin C OS=Canis lupus familiaris OX=9615 GN=Gypc PE=2 SV=1	C_familiaris	47	25	3
High	J9PAL2	Ig-like domain-containing protein OS=Canis lupus familiaris OX=9615 PE=4 SV=2	C_familiaris	69	77	3
High	A0A5F4D5V1	Fibulin-1 OS=Canis lupus familiaris OX=9615 GN=FBLN1 PE=3 SV=1	C_familiaris	28	28	3
High	A0A5F4CSD5	Ig-like domain-containing protein OS=Canis lupus familiaris OX=9615 PE=4 SV=1	C_familiaris	37	106	3
High	L7N0I0	Ig-like domain-containing protein OS=Canis lupus familiaris OX=9615 PE=4 SV=2	C_familiaris	88	103	3
High	A0A5F4D721	Tropomyosin 3 OS=Canis lupus familiaris OX=9615 GN=TPM3 PE=3 SV=1	C_familiaris	37	21	3
High	A0A5F4BR98	Ig-like domain-containing protein OS=Canis lupus familiaris OX=9615 PE=4 SV=1	C_familiaris	45	121	3
High	E2R2K4	RAP1B, member of RAS oncogene family OS=Canis lupus familiaris OX=9615 GN=RAP1B PE=3 SV=1	C_familiaris	53	11	3
High	P62872	Guanine nucleotide-binding protein G(I)/G(S)/G(T) subunit beta-1 OS=Canis lupus familiaris OX=9615 GN=GNB1 PE=2 SV=3	C_familiaris	30	11	3
High	F1PVP9	RAB1B, member RAS oncogene family OS=Canis lupus familiaris OX=9615 GN=RAB1B PE=4 SV=3	C_familiaris	48	18	3
High	A0A5F4DAX5	Ig-like domain-containing protein OS=Canis lupus familiaris OX=9615 PE=4 SV=1	C_familiaris	45	20	3
High	A0A5F4DJ18	Ig-like domain-containing protein OS=Canis lupus familiaris OX=9615 PE=4 SV=1	C_familiaris	68	34	3
High	J9PAX5	Ig-like domain-containing protein OS=Canis lupus familiaris OX=9615 PE=4 SV=2	C_familiaris	47	96	3
High	P51147	Ras-related protein Rab-5C OS=Canis lupus familiaris OX=9615 GN=RAB5C PE=2 SV=1	C_familiaris	32	10	3
High	E2RLS3	Heat shock protein 90 alpha family class B member 1 OS=Canis lupus familiaris OX=9615 GN=HSP90AB1 PE=3 SV=2	C_familiaris	11	12	3
High	A0A5F4BYG2	Ig-like domain-containing protein OS=Canis lupus familiaris OX=9615 PE=4 SV=1	C_familiaris	53	27	3
High	F6XKC0	Complement C8 gamma chain OS=Canis lupus familiaris OX=9615 GN=C8G PE=3 SV=2	C_familiaris	24	6	3
High	L7N0E8	Ig-like domain-containing protein OS=Canis lupus familiaris OX=9615 PE=4 SV=2	C_familiaris	33	14	3
High	A0A5F4CAX2	Uncharacterized protein OS=Canis lupus familiaris OX=9615 PE=4 SV=1	C_familiaris	12	9	3
High	A0A5F4CAZ5	Actinin alpha 1 OS=Canis lupus familiaris OX=9615 GN=ACTN1 PE=3 SV=1	C_familiaris	9	7	3
High	A0A5F4DFV1	Apolipoprotein C-III OS=Canis lupus familiaris OX=9615 GN=APOC3 PE=3 SV=1	C_familiaris	35	11	3
High	A0A5F4CP54	Ig-like domain-containing protein OS=Canis lupus familiaris OX=9615 PE=4 SV=1	C_familiaris	32	15	3
High	P02677	Fibrinogen beta chain (Fragment) OS=Canis lupus familiaris OX=9615 GN=FGB PE=1 SV=2	C_familiaris	84	17	3
High	Q3BCQ5	Ammonium transporter Rh type A OS=Canis lupus familiaris OX=9615 GN=RHAG PE=2 SV=1	C_familiaris	12	17	3
High	A0A5F4DBI9	Vesicle associated membrane protein 3 OS=Canis lupus familiaris OX=9615 GN=VAMP3 PE=4 SV=1	C_familiaris	39	4	3
High	J9NX46	Clathrin light chain A OS=Canis lupus familiaris OX=9615 GN=CLTA PE=4 SV=1	C_familiaris	28	5	3
High	A0A5F4CTQ3	LRR binding FLII interacting protein 1 OS=Canis lupus familiaris OX=9615 GN=LRRFIP1 PE=3 SV=1	C_familiaris	5	4	3
High	E2RNG2	ATP synthase subunit alpha OS=Canis lupus familiaris OX=9615 GN=ATP5F1A PE=3 SV=2	C_familiaris	7	6	3
High	F1PBK6	Carbonic anhydrase OS=Canis lupus familiaris OX=9615 GN=CA1 PE=3 SV=2	C_familiaris	17	6	3
High	A0A5F4C9M3	Uncharacterized protein OS=Canis lupus familiaris OX=9615 PE=4 SV=1	C_familiaris	19	4	3
High	E2RLK6	Adiponectin F1 OS=Canis lupus familiaris OX=9615 GN=LOC609026 PE=4 SV=1	C_familiaris	10	5	3
High	P18470	DLA class II histocompatibility antigen, DR-1 beta chain OS=Canis lupus familiaris OX=9615 PE=2 SV=1	C_familiaris	18	5	3
High	E2RCP9	26S proteasome non-ATPase regulatory subunit 2 OS=Canis lupus familiaris OX=9615 GN=PSMD2 PE=3 SV=1	C_familiaris	6	3	3
High	F1Q1S9	TBC1 domain family member 24 OS=Canis lupus familiaris OX=9615 GN=TBC1D24 PE=4 SV=2	C_familiaris	6	4	3
High	A0A5F4CCT6	Ribose-phosphate diphosphokinase OS=Canis lupus familiaris OX=9615 GN=PRPS2 PE=3 SV=1	C_familiaris	16	4	3
High	F1PQ40	Proteasome 26S subunit, ATPase 1 OS=Canis lupus familiaris OX=9615 GN=PSMC1 PE=3 SV=2	C_familiaris	9	4	3
High	A0A5F4D8D4	Aspartyl aminopeptidase OS=Canis lupus familiaris OX=9615 GN=DNPEP PE=3 SV=1	C_familiaris	9	3	3
High	J9P4N4	MAC-inhibitory protein OS=Canis lupus familiaris OX=9615 GN=CD59 PE=4 SV=2	C_familiaris	24	3	3
High	E2R0A0	Peroxiredoxin-like 2 activated in M-CSF stimulated monocytes OS=Canis lupus familiaris OX=9615 GN=PRXL2A PE=3 SV=3	C_familiaris	7	4	3
High	A0A5F4CL79	Biotinidase OS=Canis lupus familiaris OX=9615 GN=BTD PE=3 SV=1	C_familiaris	6	3	3
High	A0A5F4D103	Fc fragment of IgE receptor II OS=Canis lupus familiaris OX=9615 GN=FCER2 PE=4 SV=1	C_familiaris	11	4	3
High	P24406	Transforming protein RhoA OS=Canis lupus familiaris OX=9615 GN=RHOA PE=2 SV=1	C_familiaris	17	4	3
High	A0A5F4D0B9	EGF containing fibulin extracellular matrix protein 1 OS=Canis lupus familiaris OX=9615 GN=EFEMP1 PE=4 SV=1	C_familiaris	8	5	3
High	F1PHY1	Collagen alpha-2(I) chain OS=Canis lupus familiaris OX=9615 GN=COL1A2 PE=4 SV=1	C_familiaris	3	4	3
High	F1PKR3	Metavinculin OS=Canis lupus familiaris OX=9615 GN=VCL PE=3 SV=3	C_familiaris	4	4	3
High	E2RAK7	Apolipoprotein A-II OS=Canis lupus familiaris OX=9615 GN=APOA2 PE=1 SV=2	C_familiaris	49	4	3
High	A0A5F4BRV8	Vimentin OS=Canis lupus familiaris OX=9615 GN=VIM PE=3 SV=1	C_familiaris	7	3	3
High	F1PCG4	Peroxiredoxin 2 OS=Canis lupus familiaris OX=9615 GN=PRDX2 PE=3 SV=2	C_familiaris	18	4	3
High	F1P6B7	Annexin OS=Canis lupus familiaris OX=9615 GN=ANXA1 PE=3 SV=1	C_familiaris	12	4	3
High	F1PGR0	Disintegrin and metalloproteinase domain-containing protein 10 OS=Canis lupus familiaris OX=9615 GN=ADAM10 PE=4 SV=3	C_familiaris	5	5	3
High	F1PPH7	26S proteasome AAA-ATPase subunit RPT1 OS=Canis lupus familiaris OX=9615 GN=PSMC2 PE=3 SV=2	C_familiaris	8	3	3
High	P63091	Guanine nucleotide-binding protein G(s) subunit alpha OS=Canis lupus familiaris OX=9615 GN=GNAS PE=2 SV=1	C_familiaris	10	4	3
High	F1PAL5	Angiotensin 1-10 OS=Canis lupus familiaris OX=9615 GN=AGT PE=3 SV=3	C_familiaris	8	4	3
High	E2RNL8	Apolipoprotein D OS=Canis lupus familiaris OX=9615 GN=APOD PE=3 SV=3	C_familiaris	14	10	3
High	A0A5F4D2T1	Actin-related protein 2/3 complex subunit OS=Canis lupus familiaris OX=9615 GN=ARPC1B PE=3 SV=1	C_familiaris	13	3	3
High	F1PEN8	Carboxylic ester hydrolase OS=Canis lupus familiaris OX=9615 GN=BCHE PE=3 SV=1	C_familiaris	5	3	3
High	F1PK62	Peptidyl-prolyl cis-trans isomerase OS=Canis lupus familiaris OX=9615 PE=3 SV=2	C_familiaris	17	3	3
High	A0A5F4D6V1	Carboxypeptidase B2 OS=Canis lupus familiaris OX=9615 GN=CPB2 PE=3 SV=1	C_familiaris	6	5	3
High	J9P8M2	Fibronectin OS=Canis lupus familiaris OX=9615 GN=FN1 PE=4 SV=2	C_familiaris	64	1113	2
High	A0A5F4D5S9	Fibronectin OS=Canis lupus familiaris OX=9615 GN=FN1 PE=4 SV=1	C_familiaris	59	1093	2
High	A0A5F4CA42	Ig-like domain-containing protein OS=Canis lupus familiaris OX=9615 PE=4 SV=1	C_familiaris	83	131	2
High	H9GWR8	Uncharacterized protein OS=Canis lupus familiaris OX=9615 PE=4 SV=2	C_familiaris	86	268	2
High	F1PYZ1	Uncharacterized protein OS=Canis lupus familiaris OX=9615 GN=LOC609402 PE=3 SV=3	C_familiaris	57	181	2
High	A0A5F4BTN9	Ig-like domain-containing protein OS=Canis lupus familiaris OX=9615 PE=4 SV=1	C_familiaris	59	112	2
High	F1PQ99	Mannan binding lectin serine peptidase 1 OS=Canis lupus familiaris OX=9615 GN=MASP1 PE=4 SV=2	C_familiaris	24	30	2
High	A0A5F4BWC4	Ig-like domain-containing protein OS=Canis lupus familiaris OX=9615 PE=4 SV=1	C_familiaris	91	122	2
High	A0A5F4CSF0	Ig-like domain-containing protein OS=Canis lupus familiaris OX=9615 PE=4 SV=1	C_familiaris	73	161	2
High	A0A5F4DCX2	Ig-like domain-containing protein OS=Canis lupus familiaris OX=9615 PE=4 SV=1	C_familiaris	64	52	2
High	A0A5F4CWK7	Ig-like domain-containing protein OS=Canis lupus familiaris OX=9615 PE=4 SV=1	C_familiaris	62	76	2
High	J9NYY8	Ig-like domain-containing protein OS=Canis lupus familiaris OX=9615 PE=4 SV=2	C_familiaris	51	126	2
High	A0A5F4CH63	Ig-like domain-containing protein OS=Canis lupus familiaris OX=9615 PE=4 SV=1	C_familiaris	15	26	2
High	A0A5F4CMS7	IF rod domain-containing protein OS=Canis lupus familiaris OX=9615 GN=KRT14 PE=3 SV=1	C_familiaris	24	25	2
High	A0A5F4DCY9	Ig-like domain-containing protein OS=Canis lupus familiaris OX=9615 PE=4 SV=1	C_familiaris	41	50	2
High	A0A5F4CI22	Ig-like domain-containing protein OS=Canis lupus familiaris OX=9615 PE=4 SV=1	C_familiaris	41	97	2
High	A0A5F4CSP7	Ig-like domain-containing protein OS=Canis lupus familiaris OX=9615 PE=4 SV=1	C_familiaris	44	22	2
High	J9NZT2	Ig-like domain-containing protein OS=Canis lupus familiaris OX=9615 PE=4 SV=2	C_familiaris	49	104	2
High	A0A5F4CQG9	Ig-like domain-containing protein OS=Canis lupus familiaris OX=9615 PE=4 SV=1	C_familiaris	39	102	2
High	A0A5F4DFV6	Fc receptor like 4 OS=Canis lupus familiaris OX=9615 GN=FCRL4 PE=4 SV=1	C_familiaris	6	17	2
High	A0A5F4DCA5	Ig-like domain-containing protein OS=Canis lupus familiaris OX=9615 PE=4 SV=1	C_familiaris	54	26	2
High	E2RD95	G protein subunit beta 2 OS=Canis lupus familiaris OX=9615 GN=GNB2 PE=3 SV=1	C_familiaris	25	10	2
High	J9P6N4	Tyrosine 3-monooxygenase/tryptophan 5-monooxygenase activation protein eta OS=Canis lupus familiaris OX=9615 GN=YWHAH PE=3 SV=1	C_familiaris	28	11	2
High	A0A5F4CZV7	Ig-like domain-containing protein OS=Canis lupus familiaris OX=9615 PE=4 SV=1	C_familiaris	35	19	2
High	J9NRH5	Tyrosine 3-monooxygenase/tryptophan 5-monooxygenase activation protein gamma OS=Canis lupus familiaris OX=9615 GN=YWHAG PE=3 SV=2	C_familiaris	30	10	2
High	L7N071	Actinin alpha 4 OS=Canis lupus familiaris OX=9615 GN=ACTN4 PE=3 SV=2	C_familiaris	6	6	2
High	A0A5F4DLE0	Ig-like domain-containing protein OS=Canis lupus familiaris OX=9615 PE=4 SV=1	C_familiaris	47	6	2
High	E2RGB0	Apolipoprotein C-IV OS=Canis lupus familiaris OX=9615 GN=APOC4 PE=3 SV=3	C_familiaris	20	14	2
High	A0A5F4C4W3	2-phospho-D-glycerate hydro-lyase OS=Canis lupus familiaris OX=9615 PE=3 SV=1	C_familiaris	19	7	2
High	A0A5F4DFS0	RAB5B, member RAS oncogene family OS=Canis lupus familiaris OX=9615 GN=RAB5B PE=4 SV=1	C_familiaris	28	8	2
High	F1PKN5	Ig-like domain-containing protein OS=Canis lupus familiaris OX=9615 PE=4 SV=3	C_familiaris	29	7	2
High	F1PTZ5	CD44 antigen OS=Canis lupus familiaris OX=9615 GN=CD44 PE=4 SV=3	C_familiaris	4	3	2
High	J9P3W8	Nicotinate phosphoribosyltransferase OS=Canis lupus familiaris OX=9615 GN=NAPRT PE=3 SV=2	C_familiaris	7	2	2
High	E2RAL0	Rho GDP dissociation inhibitor beta OS=Canis lupus familiaris OX=9615 GN=ARHGDIB PE=3 SV=1	C_familiaris	19	4	2
High	J9NTG7	CD55 molecule OS=Canis lupus familiaris OX=9615 GN=CD55 PE=4 SV=2	C_familiaris	8	4	2
High	F1PB66	Tetraspanin OS=Canis lupus familiaris OX=9615 GN=CD81 PE=3 SV=2	C_familiaris	15	2	2
High	J9P4X0	Nucleosome assembly protein 1 like 4 OS=Canis lupus familiaris OX=9615 GN=NAP1L4 PE=3 SV=2	C_familiaris	9	4	2
High	E2RKG6	Dermokine OS=Canis lupus familiaris OX=9615 GN=DMKN PE=4 SV=3	C_familiaris	5	3	2
High	J9P086	Histone H2B OS=Canis lupus familiaris OX=9615 GN=H2BC20 PE=3 SV=2	C_familiaris	19	3	2
High	F1PH61	Ig-like domain-containing protein OS=Canis lupus familiaris OX=9615 PE=4 SV=3	C_familiaris	41	6	2
High	E2R0K4	Ras-related protein Rab-14 OS=Canis lupus familiaris OX=9615 GN=RAB14 PE=3 SV=1	C_familiaris	16	7	2
High	Q53VB8	Ferritin light chain OS=Canis lupus familiaris OX=9615 GN=FTL PE=2 SV=3	C_familiaris	18	2	2
High	A0A5F4BUJ7	Ig-like domain-containing protein OS=Canis lupus familiaris OX=9615 PE=4 SV=1	C_familiaris	14	4	2
High	A0A5F4D9M4	Uncharacterized protein OS=Canis lupus familiaris OX=9615 GN=ARF3 PE=3 SV=1	C_familiaris	11	3	2
High	F1PF90	Ig-like domain-containing protein OS=Canis lupus familiaris OX=9615 PE=4 SV=3	C_familiaris	13	8	2
High	P81709	Lysozyme C, spleen isozyme OS=Canis lupus familiaris OX=9615 PE=1 SV=1	C_familiaris	18	5	2
High	E2QXY7	Actin related protein 2 OS=Canis lupus familiaris OX=9615 GN=ACTR2 PE=3 SV=3	C_familiaris	6	3	2
High	J9P5X6	Exportin 7 OS=Canis lupus familiaris OX=9615 GN=XPO7 PE=3 SV=2	C_familiaris	2	2	2
High	F1PD06	NAD(P)(+)--arginine ADP-ribosyltransferase OS=Canis lupus familiaris OX=9615 GN=ART4 PE=3 SV=2	C_familiaris	8	2	2
High	A0A5F4C451	Ig-like domain-containing protein OS=Canis lupus familiaris OX=9615 PE=4 SV=1	C_familiaris	63	6	2
High	Q6TEQ7	Annexin A2 OS=Canis lupus familiaris OX=9615 GN=ANXA2 PE=1 SV=1	C_familiaris	6	4	2
High	F1P9A3	Ferrochelatase OS=Canis lupus familiaris OX=9615 GN=FECH PE=3 SV=2	C_familiaris	5	3	2
High	L7N0L3	Histone H4 OS=Canis lupus familiaris OX=9615 GN=H4C7 PE=3 SV=2	C_familiaris	24	4	2
High	Q4LAL9	Cathepsin D OS=Canis lupus familiaris OX=9615 GN=CTSD PE=2 SV=1	C_familiaris	7	3	2
High	P02727	Glycophorin-A OS=Canis lupus familiaris OX=9615 GN=GYPA PE=1 SV=3	C_familiaris	15	7	2
High	P54714	Triosephosphate isomerase OS=Canis lupus familiaris OX=9615 GN=TPI1 PE=1 SV=3	C_familiaris	11	2	2
High	J9P6R1	Proteasome 26S subunit, non-ATPase 7 OS=Canis lupus familiaris OX=9615 GN=PSMD7 PE=3 SV=1	C_familiaris	10	2	2
High	A0A5F4BTS3	WASP actin nucleation promoting factor OS=Canis lupus familiaris OX=9615 GN=WAS PE=4 SV=1	C_familiaris	5	2	2
High	E2REI7	Nuclear receptor binding protein 1 (Fragment) OS=Canis lupus familiaris OX=9615 GN=NRBP1 PE=4 SV=2	C_familiaris	4	2	2
High	F1PKI4	Chloride intracellular channel protein OS=Canis lupus familiaris OX=9615 GN=CLIC1 PE=3 SV=2	C_familiaris	12	3	2
High	E2RDX2	Charged multivesicular body protein 4B OS=Canis lupus familiaris OX=9615 GN=CHMP4B PE=3 SV=1	C_familiaris	10	3	2
High	J9NZ45	RAP2B, member of RAS oncogene family OS=Canis lupus familiaris OX=9615 GN=RAP2B PE=4 SV=2	C_familiaris	12	4	2
High	E2RA70	C-C motif chemokine OS=Canis lupus familiaris OX=9615 GN=CCL16 PE=3 SV=3	C_familiaris	18	4	2
High	E2RNG4	Desmoplakin OS=Canis lupus familiaris OX=9615 GN=DSP PE=4 SV=3	C_familiaris	1	2	2
High	A0A5F4CKD6	Protein kinase domain-containing protein OS=Canis lupus familiaris OX=9615 GN=CSNK2A1 PE=4 SV=1	C_familiaris	7	3	2
High	E2R857	Bleomycin hydrolase OS=Canis lupus familiaris OX=9615 GN=BLMH PE=3 SV=1	C_familiaris	5	4	2
High	F1PBK7	AAA domain-containing protein OS=Canis lupus familiaris OX=9615 GN=PSMC3 PE=3 SV=2	C_familiaris	7	2	2
High	A0A140T8E6	Junction plakoglobin OS=Canis lupus familiaris OX=9615 GN=JUP PE=3 SV=1	C_familiaris	3	4	2
High	F1PXZ9	KRAS proto-oncogene, GTPase OS=Canis lupus familiaris OX=9615 GN=KRAS PE=4 SV=2	C_familiaris	8	2	2
High	F1PG69	Collagen type III alpha 1 chain OS=Canis lupus familiaris OX=9615 GN=COL3A1 PE=4 SV=3	C_familiaris	1	2	2
High	F1P9U4	Dihydropyrimidinase-related protein 2 OS=Canis lupus familiaris OX=9615 GN=DPYSL2 PE=3 SV=2	C_familiaris	4	2	2
High	A0A5F4DDV1	Periostin OS=Canis lupus familiaris OX=9615 GN=POSTN PE=4 SV=1	C_familiaris	4	2	2
High	E2RMC1	ST13 Hsp70 interacting protein OS=Canis lupus familiaris OX=9615 GN=ST13 PE=3 SV=3	C_familiaris	7	2	2
High	E2R9D7	DnaJ heat shock protein family (Hsp40) member B1 OS=Canis lupus familiaris OX=9615 GN=DNAJB1 PE=4 SV=1	C_familiaris	7	2	2
High	A0A5F4CDH5	Uncharacterized protein OS=Canis lupus familiaris OX=9615 GN=RETNLB PE=3 SV=1	C_familiaris	20	3	2
High	F1P8L7	Rab GDP dissociation inhibitor OS=Canis lupus familiaris OX=9615 GN=GDI2 PE=3 SV=1	C_familiaris	5	2	2
High	Q28256	Platelet glycoprotein Ib alpha chain OS=Canis lupus familiaris OX=9615 GN=GP1BA PE=2 SV=2	C_familiaris	3	2	2
High	F1PE28	Transketolase OS=Canis lupus familiaris OX=9615 GN=TKT PE=4 SV=3	C_familiaris	5	2	2
High	Q5W412	Proteasome subunit beta OS=Canis lupus familiaris OX=9615 GN=PSMB9 PE=3 SV=1	C_familiaris	11	2	2
High	E2QUY7	Proteasome 26S subunit, non-ATPase 3 OS=Canis lupus familiaris OX=9615 GN=PSMD3 PE=3 SV=2	C_familiaris	4	3	2
High	F6Y713	Alpha-1-acid glycoprotein OS=Canis lupus familiaris OX=9615 GN=LOC100685620 PE=3 SV=1	C_familiaris	9	3	2
High	J9NYN2	Cysteine and glycine rich protein 1 OS=Canis lupus familiaris OX=9615 GN=CSRP1 PE=4 SV=1	C_familiaris	17	2	2
High	E2RRC9	Phosphoglycerate kinase OS=Canis lupus familiaris OX=9615 GN=PGK1 PE=3 SV=1	C_familiaris	6	2	2
High	J9P7C6	Podocalyxin OS=Canis lupus familiaris OX=9615 GN=PODXL PE=3 SV=2	C_familiaris	4	3	2
High	E2RKS4	Eukaryotic translation initiation factor 4B OS=Canis lupus familiaris OX=9615 GN=EIF4B PE=4 SV=2	C_familiaris	3	3	2
High	E2R833	Leucine rich alpha-2-glycoprotein 1 OS=Canis lupus familiaris OX=9615 GN=LRG1 PE=4 SV=3	C_familiaris	6	2	2
High	F1PHN8	Serpin family A member 4 OS=Canis lupus familiaris OX=9615 GN=SERPINA4 PE=3 SV=3	C_familiaris	6	2	2
High	A0A5F4D6J0	Protocadherin 1 OS=Canis lupus familiaris OX=9615 GN=PCDH1 PE=4 SV=1	C_familiaris	2	2	2
High	E2QUL2	Vesicle associated membrane protein 8 OS=Canis lupus familiaris OX=9615 GN=VAMP8 PE=4 SV=3	C_familiaris	21	3	2
High	E2R629	Atypical chemokine receptor 1 OS=Canis lupus familiaris OX=9615 GN=ACKR1 PE=3 SV=1	C_familiaris	6	3	2
High	A0A5F4BZF0	Ubiquinol-cytochrome c reductase core protein 2 OS=Canis lupus familiaris OX=9615 GN=UQCRC2 PE=3 SV=1	C_familiaris	9	2	2
High	E2RSE5	Dihydropyrimidinase OS=Canis lupus familiaris OX=9615 GN=DPYS PE=3 SV=3	C_familiaris	4	3	2
High	E2QW34	Proteasome subunit beta OS=Canis lupus familiaris OX=9615 GN=PSMB2 PE=3 SV=1	C_familiaris	11	2	2
High	A0A5F4CYE2	Protein-tyrosine-phosphatase OS=Canis lupus familiaris OX=9615 GN=PTPRF PE=3 SV=1	C_familiaris	1	2	2
High	A0A5F4C5K8	Membrane palmitoylated protein 2 OS=Canis lupus familiaris OX=9615 GN=MPP2 PE=3 SV=1	C_familiaris	6	3	2
High	A0A5F4C8J6	Ubiquitin carboxyl-terminal hydrolase OS=Canis lupus familiaris OX=9615 GN=USP14 PE=3 SV=1	C_familiaris	4	2	2
High	E2QV08	Malate dehydrogenase OS=Canis lupus familiaris OX=9615 GN=MDH1 PE=3 SV=3	C_familiaris	8	2	2
High	E2R081	Serpin family B member 10 OS=Canis lupus familiaris OX=9615 GN=SERPINB10 PE=3 SV=1	C_familiaris	8	2	2
High	F1PP71	Junctional adhesion molecule 1 OS=Canis lupus familiaris OX=9615 GN=F11R PE=3 SV=3	C_familiaris	7	2	2
High	A0A5F4BUK5	Integrin subunit alpha 2 OS=Canis lupus familiaris OX=9615 GN=ITGA2 PE=3 SV=1	C_familiaris	2	2	2
High	A0A5F4DB97	L-selectin OS=Canis lupus familiaris OX=9615 GN=SELL PE=3 SV=1	C_familiaris	6	2	2
High	A0A5F4C0Q1	Syntaxin 7 OS=Canis lupus familiaris OX=9615 GN=STX7 PE=3 SV=1	C_familiaris	10	2	2
High	J9NZX7	Malic enzyme OS=Canis lupus familiaris OX=9615 GN=ME1 PE=3 SV=2	C_familiaris	4	2	2
High	A0A5F4BSQ8	Karyopherin subunit beta 1 OS=Canis lupus familiaris OX=9615 GN=KPNB1 PE=3 SV=1	C_familiaris	3	2	2
High	A0A5F4BY22	EF-hand domain-containing protein OS=Canis lupus familiaris OX=9615 GN=S100A9 PE=4 SV=1	C_familiaris	10	2	2
High	A0A5F4CCM2	Phospholipid scramblase OS=Canis lupus familiaris OX=9615 GN=PLSCR1 PE=3 SV=1	C_familiaris	6	2	2
High	Q28275	Fibronectin (Fragment) OS=Canis lupus familiaris OX=9615 GN=FN1 PE=2 SV=3	C_familiaris	57	948	1
High	A0A5F4D838	Ankyrin 1 OS=Canis lupus familiaris OX=9615 GN=ANK1 PE=4 SV=1	C_familiaris	67	489	1
High	F1PRD8	Ankyrin 1 OS=Canis lupus familiaris OX=9615 GN=ANK1 PE=4 SV=3	C_familiaris	66	489	1
High	A0A5F4C8F3	Ankyrin 1 OS=Canis lupus familiaris OX=9615 GN=ANK1 PE=4 SV=1	C_familiaris	67	472	1
High	P49822	Albumin OS=Canis lupus familiaris OX=9615 GN=ALB PE=1 SV=3	C_familiaris	77	1256	1
High	F1PWR2	C4a anaphylatoxin OS=Canis lupus familiaris OX=9615 PE=4 SV=3	C_familiaris	58	259	1
High	E2RCC8	Uncharacterized protein OS=Canis lupus familiaris OX=9615 PE=4 SV=3	C_familiaris	58	572	1
High	A0A5F4CIZ1	Uncharacterized protein OS=Canis lupus familiaris OX=9615 PE=4 SV=1	C_familiaris	56	549	1
High	Z4YHI2	Uncharacterized protein OS=Canis lupus familiaris OX=9615 GN=ACTG1 PE=3 SV=2	C_familiaris	80	162	1
High	O18840	Actin, cytoplasmic 1 OS=Canis lupus familiaris OX=9615 GN=ACTB PE=2 SV=3	C_familiaris	80	165	1
High	A0A5F4C2N3	Kininogen 1 OS=Canis lupus familiaris OX=9615 GN=KNG1 PE=4 SV=1	C_familiaris	59	80	1
High	E2R886	Kininogen 1 OS=Canis lupus familiaris OX=9615 GN=KNG1 PE=4 SV=3	C_familiaris	42	81	1
High	E2RJW7	Adducin 1 OS=Canis lupus familiaris OX=9615 GN=ADD1 PE=3 SV=3	C_familiaris	40	52	1
High	E2RJW9	Adducin 1 OS=Canis lupus familiaris OX=9615 GN=ADD1 PE=3 SV=3	C_familiaris	43	52	1
High	J9NXL3	Uncharacterized protein OS=Canis lupus familiaris OX=9615 GN=LOC100855540 PE=3 SV=2	C_familiaris	89	104	1
High	P60529	Hemoglobin subunit alpha OS=Canis lupus familiaris OX=9615 GN=HBA PE=1 SV=1	C_familiaris	84	108	1
High	J9NSQ1	Ig-like domain-containing protein OS=Canis lupus familiaris OX=9615 PE=4 SV=2	C_familiaris	75	257	1
High	A0A5F4DDL4	Ig-like domain-containing protein OS=Canis lupus familiaris OX=9615 PE=4 SV=1	C_familiaris	62	120	1
High	L7N0F1	Ig-like domain-containing protein OS=Canis lupus familiaris OX=9615 GN=LOC100687054 PE=4 SV=1	C_familiaris	33	193	1
High	A0A5F4DAK7	Uncharacterized protein OS=Canis lupus familiaris OX=9615 GN=LOC609402 PE=3 SV=1	C_familiaris	48	142	1
High	A0A5F4CE12	Ig-like domain-containing protein OS=Canis lupus familiaris OX=9615 PE=4 SV=1	C_familiaris	58	104	1
High	A0A5F4D8U5	Actin beta like 2 OS=Canis lupus familiaris OX=9615 GN=ACTBL2 PE=3 SV=1	C_familiaris	30	82	1
High	A0A5F4C2R6	Ig-like domain-containing protein OS=Canis lupus familiaris OX=9615 PE=4 SV=1	C_familiaris	75	77	1
High	A0A5F4CKL2	Ig-like domain-containing protein OS=Canis lupus familiaris OX=9615 PE=4 SV=1	C_familiaris	52	60	1
High	A0A5F4C477	Fibulin-1 OS=Canis lupus familiaris OX=9615 GN=FBLN1 PE=3 SV=1	C_familiaris	24	24	1
High	A0A5F4BTM1	Ig-like domain-containing protein OS=Canis lupus familiaris OX=9615 PE=4 SV=1	C_familiaris	79	37	1
High	J9P540	Glyceraldehyde-3-phosphate dehydrogenase OS=Canis lupus familiaris OX=9615 GN=LOC477441 PE=3 SV=1	C_familiaris	26	13	1
High	A0A5F4D2F2	Ig-like domain-containing protein OS=Canis lupus familiaris OX=9615 PE=4 SV=1	C_familiaris	39	103	1
High	A0A5F4D1B8	Ig-like domain-containing protein OS=Canis lupus familiaris OX=9615 PE=4 SV=1	C_familiaris	35	118	1
High	A0A5F4CLB9	Ig-like domain-containing protein OS=Canis lupus familiaris OX=9615 PE=4 SV=1	C_familiaris	34	80	1
High	E2RF52	Proteasome subunit alpha type OS=Canis lupus familiaris OX=9615 GN=PSMA8 PE=3 SV=2	C_familiaris	24	15	1
High	A0A5F4BRE0	Tropomyosin 3 OS=Canis lupus familiaris OX=9615 GN=TPM3 PE=3 SV=1	C_familiaris	27	17	1
High	A0A5F4C493	Ig-like domain-containing protein OS=Canis lupus familiaris OX=9615 PE=4 SV=1	C_familiaris	33	32	1
High	L7N049	DLA class I alpha chain OS=Canis lupus familiaris OX=9615 GN=DLA88 PE=3 SV=2	C_familiaris	21	11	1
High	J9JHP2	Histone H2A OS=Canis lupus familiaris OX=9615 GN=H2AC7 PE=3 SV=2	C_familiaris	28	6	1
High	A0A5F4DCD2	Ig-like domain-containing protein OS=Canis lupus familiaris OX=9615 GN=DLA-64 PE=3 SV=1	C_familiaris	18	11	1
High	A0A5F4DJC7	Ig-like domain-containing protein OS=Canis lupus familiaris OX=9615 PE=4 SV=1	C_familiaris	56	35	1
High	P62822	Ras-related protein Rab-1A OS=Canis lupus familiaris OX=9615 GN=RAB1A PE=1 SV=3	C_familiaris	35	15	1
High	A0A5F4D5I3	Ig-like domain-containing protein OS=Canis lupus familiaris OX=9615 PE=4 SV=1	C_familiaris	31	33	1
High	J9P0L5	Histone H2A OS=Canis lupus familiaris OX=9615 GN=H2AC18 PE=3 SV=1	C_familiaris	44	5	1
High	A0A5F4CFG8	WD repeat, SAM and U-box domain-containing protein 1 OS=Canis lupus familiaris OX=9615 GN=WDSUB1 PE=4 SV=1	C_familiaris	6	8	1
High	A0A5F4CFM8	Tropomyosin 1 OS=Canis lupus familiaris OX=9615 GN=TPM1 PE=3 SV=1	C_familiaris	10	12	1
High	P01784	Ig heavy chain V region GOM OS=Canis lupus familiaris OX=9615 PE=1 SV=1	C_familiaris	26	11	1
High	A0A5F4C8H0	Glucosamine-6-phosphate isomerase OS=Canis lupus familiaris OX=9615 GN=GNPDA2 PE=3 SV=1	C_familiaris	10	9	1
High	A0A5F4BZA4	Microfibril associated protein 4 OS=Canis lupus familiaris OX=9615 GN=MFAP4 PE=4 SV=1	C_familiaris	5	3	1
High	E2R2M7	RAP1A, member of RAS oncogene family OS=Canis lupus familiaris OX=9615 GN=RAP1A PE=3 SV=1	C_familiaris	32	7	1
High	A0A5F4D8T4	Keratin 80 OS=Canis lupus familiaris OX=9615 GN=KRT80 PE=4 SV=1	C_familiaris	6	13	1
High	A0A5F4DCG3	Ig-like domain-containing protein OS=Canis lupus familiaris OX=9615 PE=4 SV=1	C_familiaris	19	21	1
High	J9P3L5	Ig-like domain-containing protein OS=Canis lupus familiaris OX=9615 PE=4 SV=2	C_familiaris	29	17	1
High	F1PCH3	2-phospho-D-glycerate hydro-lyase OS=Canis lupus familiaris OX=9615 GN=ENO1 PE=4 SV=3	C_familiaris	29	4	1
High	A0A5F4D946	Ig-like domain-containing protein OS=Canis lupus familiaris OX=9615 PE=4 SV=1	C_familiaris	25	10	1
High	L7N0J0	Ig-like domain-containing protein OS=Canis lupus familiaris OX=9615 PE=4 SV=2	C_familiaris	33	23	1
High	A0A5F4CT62	14-3-3 protein theta OS=Canis lupus familiaris OX=9615 GN=YWHAQ PE=3 SV=1	C_familiaris	16	7	1
High	E2R8C5	Ig-like domain-containing protein OS=Canis lupus familiaris OX=9615 PE=4 SV=2	C_familiaris	13	9	1
High	F2Z4P9	Ras-related protein Rab-10 OS=Canis lupus familiaris OX=9615 GN=RAB10 PE=4 SV=1	C_familiaris	21	10	1
High	A0A5F4CI17	Ig-like domain-containing protein OS=Canis lupus familiaris OX=9615 PE=4 SV=1	C_familiaris	25	9	1
High	F1PLM3	Tubulin alpha chain OS=Canis lupus familiaris OX=9615 PE=3 SV=2	C_familiaris	7	5	1
High	A0A5F4CBH6	Ig-like domain-containing protein OS=Canis lupus familiaris OX=9615 PE=4 SV=1	C_familiaris	29	21	1
High	P12800	Fibrinogen gamma chain (Fragment) OS=Canis lupus familiaris OX=9615 GN=FGG PE=1 SV=1	C_familiaris	58	28	1
High	P18066	Ras-related protein Rab-5A OS=Canis lupus familiaris OX=9615 GN=RAB5A PE=1 SV=1	C_familiaris	16	5	1
High	A0A5F4BUM4	Ig-like domain-containing protein OS=Canis lupus familiaris OX=9615 PE=4 SV=1	C_familiaris	15	3	1
High	A0A5F4DFG9	Phosphoribosyl pyrophosphate synthetase 1 OS=Canis lupus familiaris OX=9615 GN=PRPS1 PE=3 SV=1	C_familiaris	9	2	1
High	E2R9D5	Uncharacterized protein OS=Canis lupus familiaris OX=9615 PE=3 SV=2	C_familiaris	2	7	1
High	E2RT39	Maltase-glucoamylase 2 (putative) OS=Canis lupus familiaris OX=9615 GN=MGAM2 PE=3 SV=3	C_familiaris	1	2	1
High	J9NX48	NDK domain-containing protein OS=Canis lupus familiaris OX=9615 GN=NME4 PE=4 SV=2	C_familiaris	7	4	1
High	A0A5F4C080	Caldesmon 1 OS=Canis lupus familiaris OX=9615 GN=CALD1 PE=4 SV=1	C_familiaris	4	1	1
High	J9P932	Nucleoside diphosphate kinase OS=Canis lupus familiaris OX=9615 PE=3 SV=2	C_familiaris	8	4	1
High	A0A5F4CE93	IGv domain-containing protein OS=Canis lupus familiaris OX=9615 PE=4 SV=1	C_familiaris	14	7	1
High	F1PQP5	Ig-like domain-containing protein OS=Canis lupus familiaris OX=9615 PE=4 SV=3	C_familiaris	21	5	1
High	A0A5F4D172	Ig-like domain-containing protein OS=Canis lupus familiaris OX=9615 PE=4 SV=1	C_familiaris	13	4	1
High	P01874	Ig mu chain C region OS=Canis lupus familiaris OX=9615 PE=1 SV=1	C_familiaris	8	38	1
High	E2RM35	Pyrroline-5-carboxylate reductase OS=Canis lupus familiaris OX=9615 GN=PYCR3 PE=3 SV=2	C_familiaris	8	2	1
High	J9P5M2	Lymphocyte specific protein 1 OS=Canis lupus familiaris OX=9615 GN=LSP1 PE=4 SV=2	C_familiaris	7	2	1
High	F1PB84	Ena/VASP-like protein OS=Canis lupus familiaris OX=9615 GN=EVL PE=3 SV=2	C_familiaris	5	2	1
High	A0A5F4DB26	Christmas factor OS=Canis lupus familiaris OX=9615 GN=F9 PE=4 SV=1	C_familiaris	4	2	1
High	A0A5F4DBR8	TNF receptor associated protein 1 OS=Canis lupus familiaris OX=9615 GN=TRAP1 PE=3 SV=1	C_familiaris	3	3	1
High	A0A5F4C8U2	Major histocompatibility complex, class II, DQ beta 2 OS=Canis lupus familiaris OX=9615 GN=HLA-DQB2 PE=4 SV=1	C_familiaris	10	3	1
High	A0A5F4CVZ5	Ras-related C3 botulinum toxin substrate 1 OS=Canis lupus familiaris OX=9615 GN=RAC1 PE=4 SV=1	C_familiaris	9	4	1
High	E2R913	Calcium regulated heat stable protein 1 OS=Canis lupus familiaris OX=9615 GN=CARHSP1 PE=4 SV=2	C_familiaris	11	1	1
High	P27597	T-cell surface glycoprotein CD3 epsilon chain OS=Canis lupus familiaris OX=9615 GN=CD3E PE=2 SV=1	C_familiaris	12	2	1
High	P01785	Ig heavy chain V region MOO OS=Canis lupus familiaris OX=9615 PE=1 SV=1	C_familiaris	16	1	1
High	A0A5F4BSS2	75 kDa glucose-regulated protein OS=Canis lupus familiaris OX=9615 GN=HSPA9 PE=3 SV=1	C_familiaris	3	1	1
High	E2RH46	Uncharacterized protein OS=Canis lupus familiaris OX=9615 PE=4 SV=3	C_familiaris	1	1	1
High	F1P6Q0	G protein subunit alpha i3 OS=Canis lupus familiaris OX=9615 GN=GNAI3 PE=4 SV=2	C_familiaris	7	2	1
High	A0A5F4DG30	D-aminoacyl-tRNA deacylase OS=Canis lupus familiaris OX=9615 PE=3 SV=1	C_familiaris	5	1	1
High	A0A5F4DA40	Eukaryotic translation initiation factor 5A OS=Canis lupus familiaris OX=9615 GN=EIF5A PE=3 SV=1	C_familiaris	16	1	1
High	A0A5F4DGN2	Ribose-5-phosphate isomerase OS=Canis lupus familiaris OX=9615 GN=LOC475755 PE=3 SV=1	C_familiaris	9	1	1
High	F1P996	G protein pathway suppressor 1 OS=Canis lupus familiaris OX=9615 GN=GPS1 PE=3 SV=3	C_familiaris	4	1	1
High	E2RJH1	Rac family small GTPase 2 OS=Canis lupus familiaris OX=9615 GN=RAC2 PE=4 SV=2	C_familiaris	11	3	1
High	F6XH46	Glutathione peroxidase OS=Canis lupus familiaris OX=9615 GN=GPX1 PE=3 SV=2	C_familiaris	8	1	1
High	J9NWJ5	Thioredoxin OS=Canis lupus familiaris OX=9615 PE=3 SV=2	C_familiaris	12	1	1
High	P12278	Apolipoprotein C-II OS=Canis lupus familiaris OX=9615 GN=APOC2 PE=1 SV=1	C_familiaris	21	2	1
High	F1P7V6	Stress induced phosphoprotein 1 OS=Canis lupus familiaris OX=9615 GN=STIP1 PE=4 SV=3	C_familiaris	2	1	1
High	J9NYJ8	RAB6A, member RAS oncogene family OS=Canis lupus familiaris OX=9615 GN=RAB6A PE=4 SV=1	C_familiaris	11	6	1
High	A0A5F4DGJ6	Parvin beta OS=Canis lupus familiaris OX=9615 GN=PARVB PE=3 SV=1	C_familiaris	4	2	1
High	J9P9V8	Tetraspanin OS=Canis lupus familiaris OX=9615 GN=CD82 PE=3 SV=2	C_familiaris	6	1	1
High	A0A5F4DGR2	IGv domain-containing protein OS=Canis lupus familiaris OX=9615 PE=4 SV=1	C_familiaris	26	2	1
High	E2RM61	Proteasome 26S subunit, ATPase 5 OS=Canis lupus familiaris OX=9615 GN=PSMC5 PE=3 SV=3	C_familiaris	3	1	1
High	F1PD34	Secreted phosphoprotein 2 OS=Canis lupus familiaris OX=9615 GN=SPP2 PE=3 SV=2	C_familiaris	6	2	1
High	F1PVW0	L-lactate dehydrogenase OS=Canis lupus familiaris OX=9615 GN=LDHA PE=3 SV=2	C_familiaris	4	1	1
High	A0A5F4CGR9	Ig-like domain-containing protein OS=Canis lupus familiaris OX=9615 PE=4 SV=1	C_familiaris	10	4	1
High	A0A5F4CJE6	T-cell surface glycoprotein CD3 epsilon chain OS=Canis lupus familiaris OX=9615 GN=CD3E PE=4 SV=1	C_familiaris	9	3	1
High	A0A5F4CHH4	Pleckstrin OS=Canis lupus familiaris OX=9615 GN=PLEK PE=4 SV=1	C_familiaris	4	2	1
High	J9NT73	Brain abundant membrane attached signal protein 1 OS=Canis lupus familiaris OX=9615 GN=BASP1 PE=3 SV=2	C_familiaris	6	1	1
High	A0A5F4C6P0	Protein arginine N-methyltransferase 5 OS=Canis lupus familiaris OX=9615 GN=PRMT5 PE=3 SV=1	C_familiaris	2	1	1
High	A0A5F4CIT2	Plexin domain containing 2 OS=Canis lupus familiaris OX=9615 GN=PLXDC2 PE=3 SV=1	C_familiaris	2	1	1
High	J9P3F4	Stum, mechanosensory transduction mediator homolog OS=Canis lupus familiaris OX=9615 GN=STUM PE=4 SV=2	C_familiaris	11	2	1
High	H9GW54	Drebrin like OS=Canis lupus familiaris OX=9615 GN=DBNL PE=3 SV=3	C_familiaris	4	1	1
High	E2RGF3	Na(+)/H(+) exchange regulatory cofactor NHE-RF OS=Canis lupus familiaris OX=9615 GN=SLC9A3R1 PE=2 SV=3	C_familiaris	4	1	1
High	A0A5F4CWM0	Diaphanous related formin 1 OS=Canis lupus familiaris OX=9615 GN=DIAPH1 PE=3 SV=1	C_familiaris	1	2	1
High	E2RN00	26S proteasome non-ATPase regulatory subunit 6 OS=Canis lupus familiaris OX=9615 GN=PRICKLE2 PE=3 SV=2	C_familiaris	3	1	1
High	A0A5F4CUP4	Uncharacterized protein OS=Canis lupus familiaris OX=9615 GN=SVIP PE=4 SV=1	C_familiaris	24	1	1
High	A0A5F4BZ45	RAB35, member RAS oncogene family OS=Canis lupus familiaris OX=9615 GN=RAB35 PE=4 SV=1	C_familiaris	10	6	1
High	A0A5F4CA53	Acyl-CoA synthetase long chain family member 1 OS=Canis lupus familiaris OX=9615 GN=ACSL1 PE=4 SV=1	C_familiaris	2	1	1
High	E2R066	Serpin family B member 13 OS=Canis lupus familiaris OX=9615 GN=SERPINB13 PE=3 SV=2	C_familiaris	3	2	1
High	G1K299	Beta-glucuronidase OS=Canis lupus familiaris OX=9615 GN=GUSB PE=3 SV=2	C_familiaris	3	1	1
High	A0A5F4CCG7	Diacylglycerol lipase beta OS=Canis lupus familiaris OX=9615 GN=DAGLB PE=4 SV=1	C_familiaris	2	1	1
High	A0A5F4BSL9	Uncharacterized protein OS=Canis lupus familiaris OX=9615 PE=3 SV=1	C_familiaris	11	1	1
High	A0A5F4D4Z6	Adipsin OS=Canis lupus familiaris OX=9615 GN=ARHGAP45 PE=4 SV=1	C_familiaris	4	1	1
High	A0A5F4CDY4	LIM and senescent cell antigen-like-containing domain protein OS=Canis lupus familiaris OX=9615 GN=LIMS1 PE=4 SV=1	C_familiaris	3	1	1
High	E2RFK4	CD177 molecule OS=Canis lupus familiaris OX=9615 GN=CD177 PE=4 SV=2	C_familiaris	3	1	1
High	F1PPZ2	Ribonuclease A family member 4 OS=Canis lupus familiaris OX=9615 GN=RNASE4 PE=3 SV=3	C_familiaris	6	1	1
High	A0A5F4C357	Phospholipid scramblase OS=Canis lupus familiaris OX=9615 GN=PLSCR4 PE=3 SV=1	C_familiaris	5	1	1
High	A0A5F4BP23	Proteasome 26S subunit, non-ATPase 12 OS=Canis lupus familiaris OX=9615 GN=PSMD12 PE=3 SV=1	C_familiaris	3	1	1
High	E2REU6	IF rod domain-containing protein OS=Canis lupus familiaris OX=9615 GN=KRT18 PE=3 SV=3	C_familiaris	4	16	1
High	E2RC10	Synaptophysin like 1 OS=Canis lupus familiaris OX=9615 GN=SYPL1 PE=3 SV=3	C_familiaris	5	3	1
High	J9PAN9	Voltage-dependent anion-selective channel protein 3 OS=Canis lupus familiaris OX=9615 GN=VDAC3 PE=3 SV=2	C_familiaris	10	1	1
High	E2QXY0	Phosphoprotein membrane anchor with glycosphingolipid microdomains 1 OS=Canis lupus familiaris OX=9615 GN=PAG1 PE=4 SV=1	C_familiaris	3	2	1
High	E2QZ98	Angiopoietin like 3 OS=Canis lupus familiaris OX=9615 GN=ANGPTL3 PE=4 SV=1	C_familiaris	2	1	1
High	F1PHQ7	Calcium-transporting ATPase OS=Canis lupus familiaris OX=9615 GN=ATP2B4 PE=3 SV=3	C_familiaris	1	1	1
High	J9NRK8	Protein-ribulosamine 3-kinase OS=Canis lupus familiaris OX=9615 GN=FN3K PE=3 SV=2	C_familiaris	4	1	1
High	F1PFB7	WAS/WASL interacting protein family member 1 OS=Canis lupus familiaris OX=9615 GN=WIPF1 PE=4 SV=3	C_familiaris	2	1	1
High	Q6UR05	Multidrug resistance-associated protein 1 OS=Canis lupus familiaris OX=9615 GN=ABCC1 PE=1 SV=1	C_familiaris	1	1	1
High	A0A5F4CKF4	Tetraspanin OS=Canis lupus familiaris OX=9615 GN=TSPAN2 PE=3 SV=1	C_familiaris	6	2	1
High	E2RGR9	Fumarate hydratase, mitochondrial OS=Canis lupus familiaris OX=9615 GN=FH PE=3 SV=1	C_familiaris	3	1	1
High	J9P0G7	Alpha-amylase OS=Canis lupus familiaris OX=9615 GN=LOC607314 PE=3 SV=2	C_familiaris	4	1	1
High	A0A5F4D8R7	ATP binding cassette subfamily A member 12 OS=Canis lupus familiaris OX=9615 GN=ABCA12 PE=4 SV=1	C_familiaris	1	4	1
High	A0A5F4D5U1	Tyrosine-protein kinase OS=Canis lupus familiaris OX=9615 GN=YES1 PE=3 SV=1	C_familiaris	2	2	1
High	J9NWA8	Uncharacterized protein OS=Canis lupus familiaris OX=9615 GN=FABP5 PE=3 SV=2	C_familiaris	13	1	1
High	F1PAY4	TNF alpha induced protein 8 OS=Canis lupus familiaris OX=9615 GN=TNFAIP8 PE=4 SV=2	C_familiaris	5	1	1
High	A0A5F4CWH9	Tripeptidyl-peptidase 2 OS=Canis lupus familiaris OX=9615 GN=TPP2 PE=4 SV=1	C_familiaris	1	1	1
High	F6XEV4	Uncharacterized protein OS=Canis lupus familiaris OX=9615 PE=4 SV=2	C_familiaris	12	1	1
High	E2RLB2	Small monomeric GTPase OS=Canis lupus familiaris OX=9615 GN=RALB PE=3 SV=1	C_familiaris	4	1	1
High	F1PBA0	Uncharacterized protein OS=Canis lupus familiaris OX=9615 GN=CD58 PE=4 SV=3	C_familiaris	6	2	1
High	J9P306	6-pyruvoyl tetrahydrobiopterin synthase OS=Canis lupus familiaris OX=9615 GN=PTS PE=3 SV=1	C_familiaris	6	1	1
High	E2R7N4	Hematopoietic cell-specific Lyn substrate 1 OS=Canis lupus familiaris OX=9615 GN=HCLS1 PE=4 SV=2	C_familiaris	3	1	1
High	E2R5J0	Pentaxin OS=Canis lupus familiaris OX=9615 GN=CRP PE=3 SV=2	C_familiaris	4	1	1
High	A0A5F4C819	Leukotriene A(4) hydrolase OS=Canis lupus familiaris OX=9615 GN=LTA4H PE=3 SV=1	C_familiaris	2	1	1
High	E2R761	L-lactate dehydrogenase OS=Canis lupus familiaris OX=9615 GN=LDHB PE=3 SV=1	C_familiaris	3	2	1
High	E2QUZ2	Tetraspanin OS=Canis lupus familiaris OX=9615 GN=CD53 PE=3 SV=1	C_familiaris	7	1	1
High	A0A5F4CAQ3	Uncharacterized protein OS=Canis lupus familiaris OX=9615 PE=4 SV=1	C_familiaris	6	1	1
High	E2R0D2	Scavenger receptor cysteine rich family member with 5 domains OS=Canis lupus familiaris OX=9615 GN=SSC5D PE=4 SV=3	C_familiaris	3	1	1
High	J9P922	Cytochrome b reductase 1 OS=Canis lupus familiaris OX=9615 GN=CYBRD1 PE=4 SV=2	C_familiaris	4	2	1
High	J9P2K0	Fibulin 2 OS=Canis lupus familiaris OX=9615 GN=FBLN2 PE=3 SV=1	C_familiaris	1	1	1
High	A0A5F4C3J9	COP9 signalosome complex subunit 2 OS=Canis lupus familiaris OX=9615 GN=COPS2 PE=3 SV=1	C_familiaris	4	1	1
High	F1P7F8	Zyxin OS=Canis lupus familiaris OX=9615 GN=ZYX PE=4 SV=3	C_familiaris	4	1	1
High	E2R034	Molybdopterin molybdenumtransferase OS=Canis lupus familiaris OX=9615 GN=GPHN PE=3 SV=2	C_familiaris	1	1	1
High	E2R0W5	Uncharacterized protein OS=Canis lupus familiaris OX=9615 GN=CR2 PE=4 SV=3	C_familiaris	1	1	1
High	F1PB85	Serpin family A member 7 OS=Canis lupus familiaris OX=9615 GN=SERPINA7 PE=3 SV=2	C_familiaris	3	2	1
High	P52784	ATP-dependent 6-phosphofructokinase, muscle type OS=Canis lupus familiaris OX=9615 GN=PFKM PE=2 SV=2	C_familiaris	1	2	1
High	A0A5F4CVM1	ATP synthase F1 subunit epsilon OS=Canis lupus familiaris OX=9615 GN=ATP5IF1 PE=3 SV=1	C_familiaris	16	2	1
High	A0A5F4BQK3	Lysosomal associated membrane protein 2 OS=Canis lupus familiaris OX=9615 GN=LAMP2 PE=3 SV=1	C_familiaris	2	1	1
High	F1PR87	Pleckstrin homology domain containing O2 OS=Canis lupus familiaris OX=9615 GN=PLEKHO2 PE=4 SV=2	C_familiaris	3	2	1
High	F1PGD4	Neural EGFL like 2 OS=Canis lupus familiaris OX=9615 GN=NELL2 PE=4 SV=3	C_familiaris	1	1	1
High	J9NTL5	Glycoprotein Ib platelet subunit beta OS=Canis lupus familiaris OX=9615 GN=GP1BB PE=4 SV=2	C_familiaris	4	1	1
High	L7N0E5	Ig-like domain-containing protein OS=Canis lupus familiaris OX=9615 PE=4 SV=2	C_familiaris	6	2	1
High	A0A5F4C3T9	Phosphatidylcholine transfer protein OS=Canis lupus familiaris OX=9615 GN=PCTP PE=4 SV=1	C_familiaris	4	1	1
High	E2RD70	COP9 signalosome complex subunit 3 OS=Canis lupus familiaris OX=9615 GN=COPS3 PE=3 SV=1	C_familiaris	3	2	1
High	E2RFJ3	Solute carrier family 40 protein OS=Canis lupus familiaris OX=9615 GN=SLC40A1 PE=3 SV=2	C_familiaris	4	1	1
High	F1PNH6	Selenium binding protein 1 OS=Canis lupus familiaris OX=9615 GN=SELENBP1 PE=3 SV=3	C_familiaris	2	1	1
High	F1PQ45	Integrin subunit alpha 11 OS=Canis lupus familiaris OX=9615 GN=ITGA11 PE=3 SV=3	C_familiaris	1	1	1
High	E2RK13	Protein XRP2 OS=Canis lupus familiaris OX=9615 GN=RP2 PE=3 SV=1	C_familiaris	2	1	1
High	A0A5F4CNI4	Solute carrier family 44 member 2 OS=Canis lupus familiaris OX=9615 GN=SLC44A2 PE=3 SV=1	C_familiaris	1	2	1
High	E2QWU0	Actin-related protein 2/3 complex subunit 4 OS=Canis lupus familiaris OX=9615 GN=ARPC4 PE=3 SV=3	C_familiaris	4	2	1
High	E2QYX1	Phosphoglycerate mutase OS=Canis lupus familiaris OX=9615 GN=BPGM PE=3 SV=1	C_familiaris	4	1	1
High	A0A5F4DHC3	Tetraspanin OS=Canis lupus familiaris OX=9615 GN=CD37 PE=3 SV=1	C_familiaris	2	1	1
High	F1Q185	Ig-like domain-containing protein OS=Canis lupus familiaris OX=9615 PE=4 SV=3	C_familiaris	6	2	1
High	F1PRC5	Aamy domain-containing protein OS=Canis lupus familiaris OX=9615 GN=SLC3A2 PE=4 SV=2	C_familiaris	2	1	1
High	F1PVF1	Uncharacterized protein OS=Canis lupus familiaris OX=9615 PE=3 SV=2	C_familiaris	4	1	1
High	J9P9T3	Adenylate kinase isoenzyme 1 OS=Canis lupus familiaris OX=9615 GN=AK1 PE=3 SV=1	C_familiaris	6	1	1
High	F1PWT3	Deoxyribonuclease OS=Canis lupus familiaris OX=9615 GN=DNASE1L1 PE=3 SV=2	C_familiaris	5	1	1
High	A0A5F4CWQ9	Ig-like domain-containing protein OS=Canis lupus familiaris OX=9615 PE=4 SV=1	C_familiaris	13	2	1
High	A0A5F4C057	Ig-like domain-containing protein OS=Canis lupus familiaris OX=9615 PE=4 SV=1	C_familiaris	6	1	1
High	E2RJ26	Proteasome 26S subunit, non-ATPase 11 OS=Canis lupus familiaris OX=9615 GN=PSMD11 PE=3 SV=2	C_familiaris	3	1	1
High	F1PB96	ICAM_N domain-containing protein OS=Canis lupus familiaris OX=9615 GN=ICAM4 PE=3 SV=3	C_familiaris	3	1	1
High	A0A5F4CYS8	AA_permease_C domain-containing protein OS=Canis lupus familiaris OX=9615 PE=4 SV=1	C_familiaris	1	6	1
High	J9NX28	Small monomeric GTPase OS=Canis lupus familiaris OX=9615 GN=RALA PE=3 SV=1	C_familiaris	7	2	1
High	F1Q3V2	ATP-citrate synthase OS=Canis lupus familiaris OX=9615 GN=ACLY PE=3 SV=3	C_familiaris	1	1	1
High	A0A5F4CQ29	V-type proton ATPase subunit G OS=Canis lupus familiaris OX=9615 PE=3 SV=1	C_familiaris	12	3	1
Medium	F1PUB3	Heart development protein with EGF like domains 1 OS=Canis lupus familiaris OX=9615 GN=HEG1 PE=4 SV=3	C_familiaris	1	1	1
Medium	A0A5F4CFZ9	Cathelicidin antimicrobial peptide OS=Canis lupus familiaris OX=9615 GN=CAMP PE=3 SV=1	C_familiaris	7	1	1
Medium	F1PQM7	Tetraspanin OS=Canis lupus familiaris OX=9615 GN=CD9 PE=3 SV=3	C_familiaris	3	5	1
Medium	J9NST4	SelP_N domain-containing protein OS=Canis lupus familiaris OX=9615 GN=SELENOP PE=4 SV=2	C_familiaris	4	1	1
Medium	E2RBB8	Tyrosine-protein kinase OS=Canis lupus familiaris OX=9615 GN=LYN PE=3 SV=3	C_familiaris	3	1	1
Medium	F1PS82	Fructose-bisphosphate aldolase OS=Canis lupus familiaris OX=9615 GN=ALDOC PE=3 SV=3	C_familiaris	7	1	1
Medium	F1Q0C1	DOP1 leucine zipper like protein A OS=Canis lupus familiaris OX=9615 GN=DOP1A PE=3 SV=3	C_familiaris	0	3	1
Medium	E2RGP6	Tumor susceptibility 101 OS=Canis lupus familiaris OX=9615 GN=TSG101 PE=3 SV=2	C_familiaris	4	1	1
Medium	J9P0R8	Zinc finger protein 219 OS=Canis lupus familiaris OX=9615 GN=ZNF219 PE=4 SV=2	C_familiaris	3	1	1
Medium	F1Q0S2	Sodium/potassium-transporting ATPase subunit beta OS=Canis lupus familiaris OX=9615 GN=ATP1B3 PE=3 SV=3	C_familiaris	5	1	1
Medium	A0A5F4D627	Glutathione synthase OS=Canis lupus familiaris OX=9615 GN=GSS PE=3 SV=1	C_familiaris	4	1	1
Medium	E2RQX1	Coiled-coil domain containing 6 OS=Canis lupus familiaris OX=9615 GN=CCDC6 PE=4 SV=3	C_familiaris	3	1	1
Medium	F1P9N2	Phospholipase B-like OS=Canis lupus familiaris OX=9615 GN=PLBD1 PE=3 SV=3	C_familiaris	5	1	1
Medium	J9P9U0	Uncharacterized protein OS=Canis lupus familiaris OX=9615 PE=4 SV=2	C_familiaris	3	3	1
Medium	J9P0X7	Coactosin like F-actin binding protein 1 OS=Canis lupus familiaris OX=9615 GN=COTL1 PE=4 SV=2	C_familiaris	11	1	1
Medium	E2RGK2	Trinucleotide repeat containing adaptor 6B OS=Canis lupus familiaris OX=9615 GN=TNRC6B PE=3 SV=2	C_familiaris	0	1	1
Medium	A0A5F4CGR8	Polycomb group ring finger 3 OS=Canis lupus familiaris OX=9615 GN=PCGF3 PE=4 SV=1	C_familiaris	7	2	1
Medium	A0A5F4DCJ3	WD repeat domain 1 OS=Canis lupus familiaris OX=9615 GN=WDR1 PE=4 SV=1	C_familiaris	2	1	1
Medium	F1PCR0	Microsomal glutathione S-transferase 3 OS=Canis lupus familiaris OX=9615 GN=MGST3 PE=4 SV=2	C_familiaris	9	1	1
Medium	J9P346	SCY domain-containing protein OS=Canis lupus familiaris OX=9615 GN=PPBP PE=3 SV=1	C_familiaris	8	1	1
Medium	A0A5F4D858	cAMP-dependent protein kinase OS=Canis lupus familiaris OX=9615 GN=PRKACB PE=3 SV=1	C_familiaris	3	1	1
Medium	A0A5F4C0G8	26S proteasome non-ATPase regulatory subunit 5 OS=Canis lupus familiaris OX=9615 GN=PSMD5 PE=4 SV=1	C_familiaris	3	1	1
Medium	F1PPJ1	Phosphatidylinositol-5-phosphate 4-kinase type 2 alpha OS=Canis lupus familiaris OX=9615 GN=PIP4K2A PE=4 SV=2	C_familiaris	2	1	1
Medium	F1Q3Z3	Solute carrier organic anion transporter family member OS=Canis lupus familiaris OX=9615 GN=SLCO6A1 PE=3 SV=2	C_familiaris	1	14	1
Medium	A0A5F4CFF9	Vascular endothelial growth factor receptor 3 OS=Canis lupus familiaris OX=9615 GN=FLT4 PE=3 SV=1	C_familiaris	1	4	1
Medium	E2RKW8	Desmoglein-1 OS=Canis lupus familiaris OX=9615 GN=DSG1 PE=4 SV=3	C_familiaris	1	1	1
Medium	A0A5F4CFS5	URI1 prefoldin like chaperone OS=Canis lupus familiaris OX=9615 GN=URI1 PE=4 SV=1	C_familiaris	1	4	1
Medium	F1PQ91	Insulin-like growth factor-binding protein 3 OS=Canis lupus familiaris OX=9615 GN=IGFBP3 PE=4 SV=2	C_familiaris	3	1	1
Medium	A0A5F4D9L6	Zinc finger C4H2-type containing OS=Canis lupus familiaris OX=9615 GN=ZC4H2 PE=4 SV=1	C_familiaris	3	4	1
Medium	A0A5F4D337	Myosin VA OS=Canis lupus familiaris OX=9615 GN=MYO5A PE=3 SV=1	C_familiaris	0	1	1
Medium	E2R970	Ubiquitinyl hydrolase 1 OS=Canis lupus familiaris OX=9615 GN=USP24 PE=3 SV=3	C_familiaris	1	1	1
Medium	A0A5F4DJS8	Ribosomal_S13_N domain-containing protein OS=Canis lupus familiaris OX=9615 PE=4 SV=1	C_familiaris	33	1	1
Medium	A0A5F4C041	Folate_rec domain-containing protein OS=Canis lupus familiaris OX=9615 GN=FOLR2 PE=3 SV=1	C_familiaris	3	1	1
Medium	J9JHE0	cGMP-dependent protein kinase OS=Canis lupus familiaris OX=9615 GN=PRKG1 PE=3 SV=2	C_familiaris	2	1	1
Medium	F1PS24	Collagen type II alpha 1 chain OS=Canis lupus familiaris OX=9615 GN=COL2A1 PE=4 SV=2	C_familiaris	1	3	1
Medium	A0A5F4C6X7	Uncharacterized protein OS=Canis lupus familiaris OX=9615 PE=4 SV=1	C_familiaris	3	1	1
Medium	J9P7I2	Spectrin repeat containing nuclear envelope protein 1 OS=Canis lupus familiaris OX=9615 GN=SYNE1 PE=3 SV=2	C_familiaris	0	1	1
Medium	J9NXY4	Uncharacterized protein OS=Canis lupus familiaris OX=9615 PE=4 SV=2	C_familiaris	1	2	1
Medium	E2R868	[histone H4]-N-methyl-L-lysine20 N-methyltransferase KMT5B OS=Canis lupus familiaris OX=9615 GN=KMT5B PE=4 SV=3	C_familiaris	1	2	1
Medium	A0A5F4D532	NR LBD domain-containing protein OS=Canis lupus familiaris OX=9615 PE=4 SV=1	C_familiaris	5	1	1
Medium	A0A5F4CLI5	E3 ubiquitin protein ligase OS=Canis lupus familiaris OX=9615 GN=RNF40 PE=3 SV=1	C_familiaris	1	2	1
Medium	A0A5F4D391	Carboxypeptidase Q OS=Canis lupus familiaris OX=9615 GN=CPQ PE=4 SV=1	C_familiaris	5	1	1
Medium	F1PXV0	Uncharacterized protein OS=Canis lupus familiaris OX=9615 GN=LOC606788 PE=4 SV=2	C_familiaris	1	9	1
Medium	F1PBM4	Potassium voltage-gated channel subfamily C member 4 OS=Canis lupus familiaris OX=9615 GN=KCNC4 PE=4 SV=3	C_familiaris	1	1	1
Medium	A0A5F4D621	N-acetylglucosamine-1-phosphate transferase subunits alpha and beta OS=Canis lupus familiaris OX=9615 GN=GNPTAB PE=3 SV=1	C_familiaris	1	2	1
Medium	A0A5F4C1Q6	Coiled-coil domain containing 62 OS=Canis lupus familiaris OX=9615 GN=CCDC62 PE=4 SV=1	C_familiaris	2	1	1
Medium	F1PYP3	RNA binding motif protein 45 OS=Canis lupus familiaris OX=9615 GN=RBM45 PE=4 SV=3	C_familiaris	1	2	1
Medium	E2QXT6	Kinesin family member 11 OS=Canis lupus familiaris OX=9615 GN=KIF11 PE=3 SV=3	C_familiaris	1	1	1
Medium	F1PWR1	Insulin like growth factor 2 receptor OS=Canis lupus familiaris OX=9615 GN=IGF2R PE=4 SV=3	C_familiaris	0	1	1
Medium	A0A5F4C6F0	PAN2-PAN3 deadenylation complex subunit PAN3 OS=Canis lupus familiaris OX=9615 GN=PAN3 PE=3 SV=1	C_familiaris	2	1	1
Medium	E2R9R6	Programmed cell death 10 OS=Canis lupus familiaris OX=9615 GN=PDCD10 PE=3 SV=3	C_familiaris	11	1	1
Medium	A0A5F4BWB9	Ankyrin repeat and SOCS box containing 6 OS=Canis lupus familiaris OX=9615 GN=ASB6 PE=4 SV=1	C_familiaris	2	1	1
Medium	A0A5F4C6M3	Hepatic triacylglycerol lipase OS=Canis lupus familiaris OX=9615 GN=LIPC PE=3 SV=1	C_familiaris	3	1	1
Medium	F1PH50	SPARC (osteonectin), cwcv and kazal like domains proteoglycan 2 OS=Canis lupus familiaris OX=9615 GN=SPOCK2 PE=4 SV=3	C_familiaris	6	1	1
Medium	J9P3S6	Uncharacterized protein OS=Canis lupus familiaris OX=9615 PE=4 SV=1	C_familiaris	13	1	1
Medium	E2QWE0	COP9 signalosome subunit 5 OS=Canis lupus familiaris OX=9615 GN=COPS5 PE=3 SV=1	C_familiaris	6	1	1
Medium	E2R978	Myelin transcription factor 1 like OS=Canis lupus familiaris OX=9615 GN=MYT1L PE=3 SV=3	C_familiaris	1	1	1
Medium	A0A5F4CDV8	Phospholipid-transporting ATPase OS=Canis lupus familiaris OX=9615 GN=ATP8A1 PE=3 SV=1	C_familiaris	1	1	1
Medium	F1PRE3	Charged multivesicular body protein 6 OS=Canis lupus familiaris OX=9615 GN=CHMP6 PE=3 SV=3	C_familiaris	7	1	1
Medium	A0A5F4CJY3	Uncharacterized protein OS=Canis lupus familiaris OX=9615 GN=TRIM6 PE=4 SV=1	C_familiaris	2	4	1
Medium	A0A5F4DL64	Tyrosine-protein kinase receptor OS=Canis lupus familiaris OX=9615 GN=ROS1 PE=3 SV=1	C_familiaris	1	1	1
Medium	J9P0A1	ZFP2 zinc finger protein OS=Canis lupus familiaris OX=9615 GN=ZFP2 PE=4 SV=1	C_familiaris	5	1	1
Low	A0A5F4DFH9	Non-specific serine/threonine protein kinase OS=Canis lupus familiaris OX=9615 GN=STK10 PE=4 SV=1	C_familiaris	1	1	1
Low	A0A5F4BXZ1	TSC22 domain family member 3 OS=Canis lupus familiaris OX=9615 GN=TSC22D3 PE=3 SV=1	C_familiaris	8	1	1
Low	F1PI77	Guanylate cyclase OS=Canis lupus familiaris OX=9615 GN=GUCY1A2 PE=3 SV=3	C_familiaris	2	3	1
Low	E2RSL2	Zinc finger CCCH-type containing 4 OS=Canis lupus familiaris OX=9615 GN=ZC3H4 PE=4 SV=2	C_familiaris	1	1	1
Low	A0A5F4BRT3	Zinc finger and BTB domain containing 21 OS=Canis lupus familiaris OX=9615 GN=ZBTB21 PE=4 SV=1	C_familiaris	1	2	1
Low	F1PRV7	Uncharacterized protein OS=Canis lupus familiaris OX=9615 PE=4 SV=3	C_familiaris	3	1	1
Low	A0A5F4BY19	RELT like 1 OS=Canis lupus familiaris OX=9615 GN=RELL1 PE=3 SV=1	C_familiaris	15	1	1
High	A0A5F4CDQ5	Ig-like domain-containing protein OS=Canis lupus familiaris OX=9615 PE=4 SV=1	C_familiaris	75	114	0
High	E2R7W6	IF rod domain-containing protein OS=Canis lupus familiaris OX=9615 GN=KRT42 PE=3 SV=2	C_familiaris	19	30	0

## Sheet: 2
Protein FDR Confidence	Accession	Description	Marked as	Peptides	PSMs	Unique Peptides
High	F1P8Z5	Apolipoprotein B OS=Canis lupus familiaris OX=9615 GN=APOB PE=4 SV=2	C_familiaris	324	1344	210
High	E2R1P6	Spectrin alpha, erythrocytic 1 OS=Canis lupus familiaris OX=9615 GN=SPTA1 PE=3 SV=3	C_familiaris	169	594	129
High	F1Q253	Spectrin beta chain OS=Canis lupus familiaris OX=9615 GN=SPTB PE=3 SV=3	C_familiaris	161	476	112
High	F1PWW0	Filamin A OS=Canis lupus familiaris OX=9615 GN=FLNA PE=3 SV=3	C_familiaris	101	248	82
High	A0A5F4CWM9	Myosin-9 OS=Canis lupus familiaris OX=9615 GN=MYH9 PE=3 SV=1	C_familiaris	101	248	75
High	F1PGM1	C3-beta-c OS=Canis lupus familiaris OX=9615 GN=C3 PE=4 SV=2	C_familiaris	137	1062	72
High	F1PSC2	Talin 1 OS=Canis lupus familiaris OX=9615 GN=TLN1 PE=4 SV=3	C_familiaris	77	172	67
High	J9PBN6	Uncharacterized protein OS=Canis lupus familiaris OX=9615 GN=LOC477699 PE=3 SV=1	C_familiaris	98	724	59
High	F6UME0	Uncharacterized protein OS=Canis lupus familiaris OX=9615 GN=LOC477699 PE=3 SV=1	C_familiaris	115	672	57
High	A0A5F4D5S2	C4a anaphylatoxin OS=Canis lupus familiaris OX=9615 PE=4 SV=1	C_familiaris	78	406	54
High	J9P430	Beta-1 metal-binding globulin OS=Canis lupus familiaris OX=9615 GN=TF PE=3 SV=1	C_familiaris	65	286	48
High	A0A5F4CG91	von Willebrand factor OS=Canis lupus familiaris OX=9615 GN=VWF PE=4 SV=1	C_familiaris	56	99	48
High	E2RK21	Uncharacterized protein OS=Canis lupus familiaris OX=9615 GN=CFH PE=4 SV=3	C_familiaris	63	189	45
High	A0A5F4BYK6	Tenascin C OS=Canis lupus familiaris OX=9615 GN=TNC PE=3 SV=1	C_familiaris	50	91	42
High	F1PN98	Coagulation factor V OS=Canis lupus familiaris OX=9615 GN=F5 PE=3 SV=2	C_familiaris	49	121	42
High	F1P707	Anaphylatoxin-like domain-containing protein OS=Canis lupus familiaris OX=9615 GN=LOC484960 PE=4 SV=3	C_familiaris	47	110	40
High	F1Q421	Plasminogen OS=Canis lupus familiaris OX=9615 GN=PLG PE=3 SV=2	C_familiaris	59	147	40
High	A0A5F4DBL7	LDL receptor related protein 1 OS=Canis lupus familiaris OX=9615 GN=LRP1 PE=3 SV=1	C_familiaris	40	68	39
High	F1PBI6	Thrombospondin 1 OS=Canis lupus familiaris OX=9615 GN=THBS1 PE=3 SV=3	C_familiaris	59	137	38
High	F1PKR3	Metavinculin OS=Canis lupus familiaris OX=9615 GN=VCL PE=3 SV=3	C_familiaris	51	94	37
High	A0A5F4CNZ1	Complement component C6 OS=Canis lupus familiaris OX=9615 GN=C6 PE=3 SV=1	C_familiaris	37	84	35
High	E2RL88	Integrin subunit alpha 6 OS=Canis lupus familiaris OX=9615 GN=ITGA6 PE=3 SV=2	C_familiaris	43	123	34
High	H9GWY3	Inter-alpha-trypsin inhibitor heavy chain 4 OS=Canis lupus familiaris OX=9615 GN=ITIH4 PE=3 SV=3	C_familiaris	46	215	33
High	F1P7J4	Complement C5 OS=Canis lupus familiaris OX=9615 GN=C5 PE=4 SV=3	C_familiaris	42	133	33
High	F1PAQ3	Maltase-glucoamylase OS=Canis lupus familiaris OX=9615 GN=MGAM PE=3 SV=3	C_familiaris	41	71	32
High	E2RLQ9	15S Mg(2+)-ATPase p97 subunit OS=Canis lupus familiaris OX=9615 GN=VCP PE=3 SV=3	C_familiaris	33	67	31
High	F6Y6T8	Uncharacterized protein OS=Canis lupus familiaris OX=9615 GN=PIGR PE=4 SV=2	C_familiaris	51	295	29
High	E2QY07	Actinin alpha 1 OS=Canis lupus familiaris OX=9615 GN=ACTN1 PE=3 SV=1	C_familiaris	59	145	28
High	F1PGS2	Fibrinogen beta chain OS=Canis lupus familiaris OX=9615 GN=FGB PE=4 SV=2	C_familiaris	47	165	28
High	Q2Z1P8	Anion exchange protein OS=Canis lupus familiaris OX=9615 GN=SLC4A1 PE=2 SV=1	C_familiaris	53	554	26
High	E2R5R9	UTP--glucose-1-phosphate uridylyltransferase OS=Canis lupus familiaris OX=9615 GN=UGP2 PE=3 SV=3	C_familiaris	37	150	26
High	F1PDJ5	Apolipoprotein A-I OS=Canis lupus familiaris OX=9615 GN=APOA1 PE=3 SV=1	C_familiaris	33	257	26
High	F1PD51	Erythrocyte membrane protein band 4.2 OS=Canis lupus familiaris OX=9615 GN=EPB42 PE=3 SV=3	C_familiaris	40	115	26
High	E2RG01	Complement C7 OS=Canis lupus familiaris OX=9615 GN=C7 PE=3 SV=3	C_familiaris	30	59	25
High	F1PBL4	Fibrinogen alpha chain OS=Canis lupus familiaris OX=9615 GN=FGA PE=4 SV=2	C_familiaris	31	79	24
High	F1PSS8	Vitamin K-dependent protein S OS=Canis lupus familiaris OX=9615 GN=PROS1 PE=4 SV=3	C_familiaris	33	147	24
High	E2RT60	Integrin beta OS=Canis lupus familiaris OX=9615 GN=ITGB1 PE=3 SV=3	C_familiaris	31	94	23
High	E2RCI8	Annexin OS=Canis lupus familiaris OX=9615 GN=ANXA6 PE=3 SV=3	C_familiaris	24	49	23
High	F1PR31	Collagen type VI alpha 3 chain OS=Canis lupus familiaris OX=9615 GN=COL6A3 PE=4 SV=3	C_familiaris	23	39	23
High	P18649	Apolipoprotein E OS=Canis lupus familiaris OX=9615 GN=APOE PE=1 SV=3	C_familiaris	37	299	22
High	F1PPG5	Integrin beta OS=Canis lupus familiaris OX=9615 GN=ITGB3 PE=3 SV=2	C_familiaris	35	118	22
High	F1Q418	Inter-alpha-trypsin inhibitor heavy chain 1 OS=Canis lupus familiaris OX=9615 GN=ITIH1 PE=3 SV=2	C_familiaris	37	100	22
High	E2RRC9	Phosphoglycerate kinase OS=Canis lupus familiaris OX=9615 GN=PGK1 PE=3 SV=1	C_familiaris	27	64	22
High	E2QZQ1	Transferrin OS=Canis lupus familiaris OX=9615 GN=TF PE=3 SV=2	C_familiaris	25	58	22
High	F1PG16	Uncharacterized protein OS=Canis lupus familiaris OX=9615 GN=CD5L PE=4 SV=2	C_familiaris	42	440	21
High	J9NVC6	Immunoglobulin heavy constant mu OS=Canis lupus familiaris OX=9615 GN=IGHM PE=4 SV=2	C_familiaris	39	956	21
High	E2R5W6	Gc-globulin OS=Canis lupus familiaris OX=9615 GN=GC PE=4 SV=3	C_familiaris	25	82	21
High	A0A5F4BZM5	Ceruloplasmin OS=Canis lupus familiaris OX=9615 GN=CP PE=3 SV=1	C_familiaris	27	64	21
High	E2QXN8	Annexin OS=Canis lupus familiaris OX=9615 GN=ANXA11 PE=3 SV=2	C_familiaris	24	81	21
High	F1PEN6	Transferrin receptor protein 1 OS=Canis lupus familiaris OX=9615 GN=TFRC PE=3 SV=2	C_familiaris	25	53	21
High	F1P8G0	Fibrinogen gamma chain OS=Canis lupus familiaris OX=9615 GN=FGG PE=4 SV=2	C_familiaris	42	128	20
High	F1PRU9	Integrin subunit alpha 2b OS=Canis lupus familiaris OX=9615 GN=ITGA2B PE=3 SV=2	C_familiaris	24	82	20
High	A0A5F4BXN3	Actin-depolymerizing factor OS=Canis lupus familiaris OX=9615 GN=GSN PE=3 SV=1	C_familiaris	28	69	20
High	A0A5F4CZM1	Sulfhydryl oxidase OS=Canis lupus familiaris OX=9615 GN=QSOX1 PE=3 SV=1	C_familiaris	25	59	20
High	E2RES2	Antithrombin-III OS=Canis lupus familiaris OX=9615 GN=SERPINC1 PE=3 SV=3	C_familiaris	26	70	20
High	J9NZL6	Reelin OS=Canis lupus familiaris OX=9615 GN=RELN PE=3 SV=2	C_familiaris	21	42	20
High	P19006	Haptoglobin OS=Canis lupus familiaris OX=9615 GN=HP PE=1 SV=2	C_familiaris	25	134	19
High	F1P903	Complement subcomponent C1r OS=Canis lupus familiaris OX=9615 GN=C1R PE=4 SV=2	C_familiaris	26	55	19
High	F1PG39	Inter-alpha-trypsin inhibitor heavy chain 2 OS=Canis lupus familiaris OX=9615 GN=ITIH2 PE=3 SV=3	C_familiaris	30	124	18
High	E2R141	Complement component 8 subunit beta OS=Canis lupus familiaris OX=9615 GN=C8B PE=3 SV=1	C_familiaris	23	57	18
High	J9NSF9	Activation peptide fragment 1 OS=Canis lupus familiaris OX=9615 GN=F2 PE=4 SV=2	C_familiaris	22	69	18
High	F6XYK7	Adducin 2 OS=Canis lupus familiaris OX=9615 GN=ADD2 PE=3 SV=1	C_familiaris	22	36	18
High	A0A5F4BS96	Complement C1s OS=Canis lupus familiaris OX=9615 GN=C1S PE=4 SV=1	C_familiaris	25	55	18
High	E2RFV9	Complement C9 OS=Canis lupus familiaris OX=9615 GN=C9 PE=3 SV=3	C_familiaris	23	49	18
High	A0A5F4D8A3	Low density lipoprotein receptor OS=Canis lupus familiaris OX=9615 GN=LDLR PE=4 SV=1	C_familiaris	23	42	18
High	E2RS75	C3/C5 convertase OS=Canis lupus familiaris OX=9615 GN=CFB PE=4 SV=2	C_familiaris	21	51	17
High	A0A5F4C5P0	Disintegrin and metalloproteinase domain-containing protein 10 OS=Canis lupus familiaris OX=9615 GN=ADAM10 PE=4 SV=1	C_familiaris	18	32	17
High	E2R0T6	Heat shock protein family A (Hsp70) member 8 OS=Canis lupus familiaris OX=9615 GN=HSPA8 PE=3 SV=1	C_familiaris	28	65	16
High	E2QZ50	Adenylyl cyclase-associated protein OS=Canis lupus familiaris OX=9615 GN=CAP1 PE=3 SV=1	C_familiaris	21	58	16
High	E2R7A3	Complement factor I OS=Canis lupus familiaris OX=9615 GN=CFI PE=4 SV=3	C_familiaris	28	59	16
High	E2QZN8	Pentraxin 3 OS=Canis lupus familiaris OX=9615 GN=PTX3 PE=4 SV=2	C_familiaris	20	68	16
High	E2RK64	Fermitin family member 3 OS=Canis lupus familiaris OX=9615 GN=FERMT3 PE=3 SV=2	C_familiaris	16	42	16
High	F1PQ46	Anoctamin OS=Canis lupus familiaris OX=9615 GN=ANO6 PE=3 SV=3	C_familiaris	17	36	16
High	F1PEU6	Hemicentin 2 OS=Canis lupus familiaris OX=9615 GN=HMCN2 PE=4 SV=3	C_familiaris	16	23	16
High	E2R109	Complement C8 alpha chain OS=Canis lupus familiaris OX=9615 GN=C8A PE=3 SV=1	C_familiaris	27	53	15
High	A0A5S6DEE6	Clusterin OS=Canis lupus familiaris OX=9615 GN=CLU PE=3 SV=1	C_familiaris	20	66	15
High	A0A5S6CLE1	Catalase OS=Canis lupus familiaris OX=9615 GN=CAT PE=3 SV=1	C_familiaris	15	30	15
High	F1PKX3	Coagulation factor XIII A chain OS=Canis lupus familiaris OX=9615 GN=F13A1 PE=3 SV=2	C_familiaris	17	39	15
High	F1PB77	Alpha-1,4 glucan phosphorylase OS=Canis lupus familiaris OX=9615 GN=PYGL PE=3 SV=2	C_familiaris	18	28	15
High	F1PGM9	Complement component 4 binding protein alpha OS=Canis lupus familiaris OX=9615 GN=C4BPA PE=4 SV=3	C_familiaris	67	974	14
High	F1PVW0	L-lactate dehydrogenase OS=Canis lupus familiaris OX=9615 GN=LDHA PE=3 SV=2	C_familiaris	26	98	14
High	P18067	Ras-related protein Rab-7a OS=Canis lupus familiaris OX=9615 GN=RAB7A PE=1 SV=1	C_familiaris	22	55	14
High	J9NX65	Uncharacterized protein OS=Canis lupus familiaris OX=9615 GN=SBSN PE=4 SV=2	C_familiaris	15	37	14
High	F1P679	Actin-like protein 3 OS=Canis lupus familiaris OX=9615 GN=ACTR3 PE=3 SV=2	C_familiaris	18	50	14
High	E2RSE5	Dihydropyrimidinase OS=Canis lupus familiaris OX=9615 GN=DPYS PE=3 SV=3	C_familiaris	18	42	14
High	F1PAG6	Arp2/3 complex 34 kDa subunit OS=Canis lupus familiaris OX=9615 GN=ARPC2 PE=3 SV=3	C_familiaris	16	43	14
High	E2RQ14	Annexin OS=Canis lupus familiaris OX=9615 GN=ANXA5 PE=3 SV=3	C_familiaris	17	37	14
High	A0A5F4BTV9	Fructose-bisphosphate aldolase OS=Canis lupus familiaris OX=9615 GN=ALDOB PE=3 SV=1	C_familiaris	26	114	13
High	E2R3R2	Proteasome subunit beta OS=Canis lupus familiaris OX=9615 GN=PSMB5 PE=3 SV=1	C_familiaris	16	44	13
High	A0A5F4D2T1	Actin-related protein 2/3 complex subunit OS=Canis lupus familiaris OX=9615 GN=ARPC1B PE=3 SV=1	C_familiaris	18	44	13
High	A0A5F4CWL0	Galectin-3-binding protein OS=Canis lupus familiaris OX=9615 GN=CANT1 PE=4 SV=1	C_familiaris	15	37	13
High	F1PNR5	Coagulation factor XI OS=Canis lupus familiaris OX=9615 GN=F11 PE=3 SV=3	C_familiaris	22	46	13
High	A0A5F4CNE2	Cartilage oligomeric matrix protein OS=Canis lupus familiaris OX=9615 GN=COMP PE=3 SV=1	C_familiaris	16	28	13
High	F1Q313	Homogentisate 1,2-dioxygenase OS=Canis lupus familiaris OX=9615 GN=HGD PE=3 SV=2	C_familiaris	19	40	13
High	F1PB20	Calpain 5 OS=Canis lupus familiaris OX=9615 GN=CAPN5 PE=3 SV=2	C_familiaris	13	26	13
High	E2R1N7	Prenylcysteine oxidase 1 OS=Canis lupus familiaris OX=9615 GN=PCYOX1 PE=3 SV=1	C_familiaris	15	32	13
High	F1PXD6	Proteoglycan 4 OS=Canis lupus familiaris OX=9615 GN=PRG4 PE=4 SV=3	C_familiaris	13	35	13
High	F1Q0A7	Sushi, von Willebrand factor type A, EGF and pentraxin domain containing 1 OS=Canis lupus familiaris OX=9615 GN=SVEP1 PE=4 SV=3	C_familiaris	13	23	13
High	A0A5F4CLP4	Uncharacterized protein OS=Canis lupus familiaris OX=9615 GN=LOC609365 PE=4 SV=1	C_familiaris	13	31	13
High	F6UZV8	Calcium-activated neutral proteinase 1 OS=Canis lupus familiaris OX=9615 GN=CAPN1 PE=3 SV=2	C_familiaris	13	19	13
High	A0A5F4BUK5	Integrin subunit alpha 2 OS=Canis lupus familiaris OX=9615 GN=ITGA2 PE=3 SV=1	C_familiaris	14	21	13
High	E2QZ98	Angiopoietin like 3 OS=Canis lupus familiaris OX=9615 GN=ANGPTL3 PE=4 SV=1	C_familiaris	14	33	13
High	F1PF02	Proteasome subunit beta OS=Canis lupus familiaris OX=9615 GN=PSMB1 PE=3 SV=3	C_familiaris	16	43	12
High	J9P7F7	Ficolin 1 OS=Canis lupus familiaris OX=9615 GN=FCN1 PE=3 SV=1	C_familiaris	15	96	12
High	E2RJY0	Potassium channel tetramerization domain containing 12 OS=Canis lupus familiaris OX=9615 GN=KCTD12 PE=4 SV=2	C_familiaris	15	49	12
High	A0A5F4D4F1	Moesin OS=Canis lupus familiaris OX=9615 GN=MSN PE=4 SV=1	C_familiaris	17	31	12
High	A0A5F4CAZ7	Sodium/potassium-transporting ATPase subunit alpha OS=Canis lupus familiaris OX=9615 GN=ATP1A1 PE=3 SV=1	C_familiaris	12	22	12
High	A0A5F4DCJ3	WD repeat domain 1 OS=Canis lupus familiaris OX=9615 GN=WDR1 PE=4 SV=1	C_familiaris	12	19	12
High	E2QZ19	Serum albumin OS=Canis lupus familiaris OX=9615 GN=AFP PE=4 SV=2	C_familiaris	12	23	12
High	E2QXD1	Annexin OS=Canis lupus familiaris OX=9615 GN=ANXA7 PE=3 SV=2	C_familiaris	13	27	12
High	E2R761	L-lactate dehydrogenase OS=Canis lupus familiaris OX=9615 GN=LDHB PE=3 SV=1	C_familiaris	17	59	11
High	F1PXX1	EH domain containing 3 OS=Canis lupus familiaris OX=9615 GN=EHD3 PE=4 SV=2	C_familiaris	15	31	11
High	A0A5F4CZY7	Proteasome subunit alpha type OS=Canis lupus familiaris OX=9615 GN=PSMA1 PE=3 SV=1	C_familiaris	16	54	11
High	F1PZC6	Histidine rich glycoprotein OS=Canis lupus familiaris OX=9615 GN=HRG PE=4 SV=3	C_familiaris	15	54	11
High	F1PIC7	78 kDa glucose-regulated protein OS=Canis lupus familiaris OX=9615 GN=HSPA5 PE=3 SV=2	C_familiaris	14	26	11
High	E2QXY7	Actin related protein 2 OS=Canis lupus familiaris OX=9615 GN=ACTR2 PE=3 SV=3	C_familiaris	16	38	11
High	F1PZR4	Amyloid beta precursor protein binding family B member 1 OS=Canis lupus familiaris OX=9615 GN=APBB1 PE=4 SV=3	C_familiaris	11	41	11
High	E2QZQ6	Copine 3 OS=Canis lupus familiaris OX=9615 GN=CPNE3 PE=3 SV=2	C_familiaris	12	20	11
High	F1PR54	Uncharacterized protein OS=Canis lupus familiaris OX=9615 GN=LTF PE=3 SV=1	C_familiaris	12	18	11
High	F1Q094	Platelet-activating factor acetylhydrolase OS=Canis lupus familiaris OX=9615 GN=PLA2G7 PE=4 SV=1	C_familiaris	12	20	11
High	F1PYM4	Insulin like growth factor binding protein acid labile subunit OS=Canis lupus familiaris OX=9615 GN=IGFALS PE=4 SV=2	C_familiaris	11	23	11
High	A0A5F4CP88	Protein-tyrosine-phosphatase OS=Canis lupus familiaris OX=9615 GN=PTPRC PE=4 SV=1	C_familiaris	11	16	11
High	A0A5F4BUZ8	Transketolase OS=Canis lupus familiaris OX=9615 GN=TKT PE=4 SV=1	C_familiaris	11	18	11
High	P33703	Beta-2-glycoprotein 1 OS=Canis lupus familiaris OX=9615 GN=APOH PE=2 SV=1	C_familiaris	14	71	10
High	E2RMN2	Proteasome subunit alpha type OS=Canis lupus familiaris OX=9615 GN=PSMA6 PE=3 SV=1	C_familiaris	14	40	10
High	A0A5F4CR91	Basigin OS=Canis lupus familiaris OX=9615 GN=BSG PE=4 SV=1	C_familiaris	10	38	10
High	E2R8K8	Uncharacterized protein OS=Canis lupus familiaris OX=9615 GN=LOC490399 PE=4 SV=3	C_familiaris	12	40	10
High	A0A5F4D1L1	Solute carrier family 44 member 1 OS=Canis lupus familiaris OX=9615 GN=SLC44A1 PE=3 SV=1	C_familiaris	12	21	10
High	A0A5F4DEN6	Glycosyl-phosphatidylinositol-specific phospholipase D OS=Canis lupus familiaris OX=9615 GN=GPLD1 PE=3 SV=1	C_familiaris	11	28	10
High	E2QX17	Proteasome subunit beta OS=Canis lupus familiaris OX=9615 GN=PSMB3 PE=3 SV=1	C_familiaris	12	36	10
High	A0A5F4C9D6	Flotillin OS=Canis lupus familiaris OX=9615 GN=DHRS13 PE=3 SV=1	C_familiaris	11	16	10
High	E2RMT7	GMP reductase OS=Canis lupus familiaris OX=9615 GN=GMPR PE=3 SV=1	C_familiaris	13	38	10
High	E2RJW7	Adducin 1 OS=Canis lupus familiaris OX=9615 GN=ADD1 PE=3 SV=3	C_familiaris	12	23	10
High	A0A5F4CUH8	Golgi membrane protein 1 OS=Canis lupus familiaris OX=9615 GN=GOLM1 PE=3 SV=1	C_familiaris	11	29	10
High	A0A5F4C709	ATP binding cassette subfamily B member 6 OS=Canis lupus familiaris OX=9615 GN=ABCB6 PE=4 SV=1	C_familiaris	10	14	10
High	A0A5F4C175	Platelet and endothelial cell adhesion molecule 1 OS=Canis lupus familiaris OX=9615 GN=PECAM1 PE=4 SV=1	C_familiaris	11	23	10
High	A0A5F4C0A8	Coagulation factor XIII B chain OS=Canis lupus familiaris OX=9615 GN=F13B PE=4 SV=1	C_familiaris	10	16	10
High	A0A5F4C8G1	Ras suppressor protein 1 OS=Canis lupus familiaris OX=9615 GN=RSU1 PE=4 SV=1	C_familiaris	11	33	10
High	F1P7W0	Uncharacterized protein OS=Canis lupus familiaris OX=9615 GN=SELP PE=3 SV=2	C_familiaris	11	18	10
High	J9NXJ4	Hexose-6-phosphate dehydrogenase/glucose 1-dehydrogenase OS=Canis lupus familiaris OX=9615 GN=H6PD PE=4 SV=2	C_familiaris	10	19	10
High	A0A5F4CT48	Integrin subunit alpha M OS=Canis lupus familiaris OX=9615 GN=ITGAM PE=3 SV=1	C_familiaris	11	14	10
High	J9P9J6	Uncharacterized protein OS=Canis lupus familiaris OX=9615 PE=4 SV=2	C_familiaris	21	271	9
High	E2RH18	Complement factor properdin OS=Canis lupus familiaris OX=9615 GN=CFP PE=4 SV=1	C_familiaris	11	30	9
High	H9GWG4	Inter-alpha-trypsin inhibitor heavy chain 3 OS=Canis lupus familiaris OX=9615 GN=ITIH3 PE=3 SV=3	C_familiaris	16	30	9
High	Q95MP7	Ferritin heavy chain OS=Canis lupus familiaris OX=9615 GN=FTH1 PE=2 SV=3	C_familiaris	13	39	9
High	A0A5F4CED7	Plasma retinol-binding protein OS=Canis lupus familiaris OX=9615 GN=RBP4 PE=3 SV=1	C_familiaris	12	30	9
High	E2RPW3	Paraoxonase 3 OS=Canis lupus familiaris OX=9615 GN=PON3 PE=3 SV=3	C_familiaris	10	26	9
High	J9PAA4	Carboxypeptidase N subunit 2 OS=Canis lupus familiaris OX=9615 GN=CPN2 PE=4 SV=1	C_familiaris	9	24	9
High	F1P933	Angiopoietin-1 OS=Canis lupus familiaris OX=9615 GN=ANGPT1 PE=4 SV=3	C_familiaris	10	15	9
High	Q28288	Syntaxin-binding protein 2 OS=Canis lupus familiaris OX=9615 GN=STXBP2 PE=2 SV=1	C_familiaris	9	14	9
High	E2R081	Serpin family B member 10 OS=Canis lupus familiaris OX=9615 GN=SERPINB10 PE=3 SV=1	C_familiaris	10	17	9
High	E2RD86	Protein disulfide-isomerase OS=Canis lupus familiaris OX=9615 GN=PDIA3 PE=3 SV=1	C_familiaris	9	16	9
High	E2R4V3	Serpin family F member 2 OS=Canis lupus familiaris OX=9615 GN=SERPINF2 PE=3 SV=1	C_familiaris	9	17	9
High	P54714	Triosephosphate isomerase OS=Canis lupus familiaris OX=9615 GN=TPI1 PE=1 SV=3	C_familiaris	9	16	9
High	F1P8N6	Endoplasmin OS=Canis lupus familiaris OX=9615 GN=HSP90B1 PE=3 SV=1	C_familiaris	9	16	9
High	Q28256	Platelet glycoprotein Ib alpha chain OS=Canis lupus familiaris OX=9615 GN=GP1BA PE=2 SV=2	C_familiaris	10	18	9
High	Z4YHI2	Uncharacterized protein OS=Canis lupus familiaris OX=9615 GN=ACTG1 PE=3 SV=2	C_familiaris	34	165	8
High	Q28259	Glyceraldehyde-3-phosphate dehydrogenase OS=Canis lupus familiaris OX=9615 GN=GAPDH PE=2 SV=3	C_familiaris	18	47	8
High	J9NUI6	Alpha-1-microglobulin OS=Canis lupus familiaris OX=9615 GN=AMBP PE=3 SV=1	C_familiaris	15	33	8
High	F1PNV5	Coagulation factor XI OS=Canis lupus familiaris OX=9615 GN=F11 PE=4 SV=3	C_familiaris	18	41	8
High	E2RPC6	Proteasome subunit beta OS=Canis lupus familiaris OX=9615 GN=PSMB7 PE=2 SV=3	C_familiaris	11	30	8
High	E2QVU9	Biliverdin reductase B OS=Canis lupus familiaris OX=9615 GN=BLVRB PE=4 SV=1	C_familiaris	11	30	8
High	J9P6N4	Tyrosine 3-monooxygenase/tryptophan 5-monooxygenase activation protein eta OS=Canis lupus familiaris OX=9615 GN=YWHAH PE=3 SV=1	C_familiaris	11	25	8
High	F1Q317	Galectin OS=Canis lupus familiaris OX=9615 GN=LGALS9 PE=4 SV=1	C_familiaris	11	48	8
High	A0A5F4CEP4	Fetuin B OS=Canis lupus familiaris OX=9615 GN=FETUB PE=4 SV=1	C_familiaris	10	39	8
High	E2QSE3	Flotillin OS=Canis lupus familiaris OX=9615 GN=FLOT1 PE=3 SV=1	C_familiaris	10	19	8
High	A0A5F4DGJ6	Parvin beta OS=Canis lupus familiaris OX=9615 GN=PARVB PE=3 SV=1	C_familiaris	9	19	8
High	A0A5F4CWA9	Proteasome subunit alpha type OS=Canis lupus familiaris OX=9615 GN=PSMA2 PE=3 SV=1	C_familiaris	10	34	8
High	A0A5F4CHN8	Thrombospondin 4 OS=Canis lupus familiaris OX=9615 GN=THBS4 PE=3 SV=1	C_familiaris	10	17	8
High	J9P1G2	Adiponectin A OS=Canis lupus familiaris OX=9615 GN=C1QB PE=4 SV=1	C_familiaris	11	54	8
High	F1PUM6	SMB domain-containing protein OS=Canis lupus familiaris OX=9615 GN=VTN PE=4 SV=2	C_familiaris	10	27	8
High	J9NX73	Ribose-5-phosphate isomerase OS=Canis lupus familiaris OX=9615 GN=RPIA PE=3 SV=1	C_familiaris	9	16	8
High	F1Q1K9	Hyaluronan binding protein 2 OS=Canis lupus familiaris OX=9615 GN=HABP2 PE=4 SV=3	C_familiaris	8	17	8
High	E2RP98	Carboxylic ester hydrolase OS=Canis lupus familiaris OX=9615 GN=ACHE PE=3 SV=3	C_familiaris	9	18	8
High	F1PAB0	Uncharacterized protein OS=Canis lupus familiaris OX=9615 GN=LOC489647 PE=4 SV=3	C_familiaris	8	15	8
High	J9P5P9	Apolipoprotein B receptor OS=Canis lupus familiaris OX=9615 GN=APOBR PE=4 SV=1	C_familiaris	8	13	8
High	E2R9N5	RNA binding motif protein 12 OS=Canis lupus familiaris OX=9615 GN=RBM12 PE=3 SV=2	C_familiaris	9	15	8
High	E2R9D2	Coagulation factor XII OS=Canis lupus familiaris OX=9615 GN=F12 PE=4 SV=3	C_familiaris	9	14	8
High	A0A5F4D3V6	Integrin beta OS=Canis lupus familiaris OX=9615 GN=ITGB2 PE=3 SV=1	C_familiaris	8	19	8
High	E2QUY1	RAS p21 protein activator 3 OS=Canis lupus familiaris OX=9615 GN=RASA3 PE=4 SV=2	C_familiaris	8	12	8
High	E2RS79	C3/C5 convertase OS=Canis lupus familiaris OX=9615 GN=C2 PE=4 SV=2	C_familiaris	8	13	8
High	E2RLN1	Serpin family D member 1 OS=Canis lupus familiaris OX=9615 GN=SERPIND1 PE=3 SV=2	C_familiaris	8	13	8
High	F1PNY2	Immunoglobulin kappa constant OS=Canis lupus familiaris OX=9615 GN=IGKC PE=4 SV=3	C_familiaris	18	326	7
High	E2RBR6	Proteasome subunit beta OS=Canis lupus familiaris OX=9615 GN=PSMB4 PE=3 SV=1	C_familiaris	12	34	7
High	F1PBL1	14_3_3 domain-containing protein OS=Canis lupus familiaris OX=9615 GN=YWHAZ PE=3 SV=3	C_familiaris	11	28	7
High	F1PDY8	Carbonic anhydrase OS=Canis lupus familiaris OX=9615 GN=CA2 PE=3 SV=3	C_familiaris	11	18	7
High	F1P8L7	Rab GDP dissociation inhibitor OS=Canis lupus familiaris OX=9615 GN=GDI2 PE=3 SV=1	C_familiaris	14	20	7
High	F1PBK6	Carbonic anhydrase OS=Canis lupus familiaris OX=9615 GN=CA1 PE=3 SV=2	C_familiaris	11	29	7
High	F1PGY1	Heat shock protein 90 alpha family class A member 1 OS=Canis lupus familiaris OX=9615 GN=HSP90AA1 PE=3 SV=3	C_familiaris	11	22	7
High	F1PQN5	Cofilin, non-muscle isoform OS=Canis lupus familiaris OX=9615 GN=CFL1 PE=3 SV=3	C_familiaris	8	19	7
High	P38400	Guanine nucleotide-binding protein G(i) subunit alpha-2 OS=Canis lupus familiaris OX=9615 GN=GNAI2 PE=2 SV=2	C_familiaris	10	20	7
High	A0A5F4CBF2	Tropomyosin 4 OS=Canis lupus familiaris OX=9615 GN=TPM4 PE=3 SV=1	C_familiaris	10	18	7
High	F2Z4Q7	Serpin family F member 1 OS=Canis lupus familiaris OX=9615 GN=SERPINF1 PE=3 SV=1	C_familiaris	7	12	7
High	P62999	Ras-related C3 botulinum toxin substrate 1 OS=Canis lupus familiaris OX=9615 GN=RAC1 PE=2 SV=1	C_familiaris	10	20	7
High	A0A5F4CW76	ATP synthase subunit beta OS=Canis lupus familiaris OX=9615 GN=ATP5F1B PE=3 SV=1	C_familiaris	8	14	7
High	F1P983	Protein-tyrosine-phosphatase OS=Canis lupus familiaris OX=9615 GN=PTPRJ PE=4 SV=2	C_familiaris	7	12	7
High	J9NWG4	C-type lectin domain-containing protein OS=Canis lupus familiaris OX=9615 GN=MBL2 PE=4 SV=2	C_familiaris	8	42	7
High	F1PH87	Serpin family A member 3 OS=Canis lupus familiaris OX=9615 GN=SERPINA3 PE=3 SV=3	C_familiaris	7	13	7
High	E2R7E8	Acyl-peptide hydrolase OS=Canis lupus familiaris OX=9615 GN=APEH PE=4 SV=2	C_familiaris	8	14	7
High	F1PYX9	Serpin family G member 1 OS=Canis lupus familiaris OX=9615 GN=SERPING1 PE=3 SV=3	C_familiaris	7	16	7
High	Q7YQC6	Heat shock 70 kDa protein 1 OS=Canis lupus familiaris OX=9615 GN=HSPA1 PE=2 SV=1	C_familiaris	10	16	7
High	F1PHQ0	Clathrin heavy chain OS=Canis lupus familiaris OX=9615 GN=CLTC PE=3 SV=3	C_familiaris	7	9	7
High	A0A5F4DH03	Coagulation factor X OS=Canis lupus familiaris OX=9615 GN=F10 PE=4 SV=1	C_familiaris	8	19	7
High	F6XY66	Transforming protein RhoA OS=Canis lupus familiaris OX=9615 GN=RHOA PE=4 SV=1	C_familiaris	7	15	7
High	A0A5F4D5V1	Fibulin-1 OS=Canis lupus familiaris OX=9615 GN=FBLN1 PE=3 SV=1	C_familiaris	7	11	7
High	F1P8B4	Calnexin OS=Canis lupus familiaris OX=9615 GN=CANX PE=3 SV=2	C_familiaris	7	11	7
High	F1PDQ2	Dematin actin binding protein OS=Canis lupus familiaris OX=9615 GN=DMTN PE=4 SV=3	C_familiaris	7	12	7
High	F1PH57	NCK associated protein 1 OS=Canis lupus familiaris OX=9615 GN=NCKAP1 PE=4 SV=2	C_familiaris	7	8	7
High	F1PQS3	F-actin-capping protein subunit beta OS=Canis lupus familiaris OX=9615 GN=CAPZB PE=3 SV=2	C_familiaris	9	13	7
High	F1PNY6	Transient receptor potential cation channel subfamily C member 6 OS=Canis lupus familiaris OX=9615 GN=TRPC6 PE=4 SV=3	C_familiaris	10	16	7
High	A0A5F4CTD0	Alpha-1-B glycoprotein OS=Canis lupus familiaris OX=9615 GN=A1BG PE=4 SV=1	C_familiaris	7	19	7
High	F1PCV3	Angiotensin-converting enzyme OS=Canis lupus familiaris OX=9615 GN=ACE PE=3 SV=3	C_familiaris	7	14	7
High	F1PW10	Transforming growth factor-beta-induced protein ig-h3 OS=Canis lupus familiaris OX=9615 GN=TGFBI PE=4 SV=3	C_familiaris	7	13	7
High	A0A5F4C819	Leukotriene A(4) hydrolase OS=Canis lupus familiaris OX=9615 GN=LTA4H PE=3 SV=1	C_familiaris	7	9	7
High	J9JHN1	RAB11B, member RAS oncogene family OS=Canis lupus familiaris OX=9615 GN=RAB11B PE=4 SV=1	C_familiaris	7	10	7
High	A0A5S6CZL3	Apolipoprotein A-IV OS=Canis lupus familiaris OX=9615 GN=APOA4 PE=3 SV=1	C_familiaris	20	54	6
High	F1PKW7	Tyrosine 3-monooxygenase/tryptophan 5-monooxygenase activation protein beta OS=Canis lupus familiaris OX=9615 GN=YWHAB PE=3 SV=3	C_familiaris	12	24	6
High	A0A0B4J198	Adiponectin D OS=Canis lupus familiaris OX=9615 GN=EIF4A2 PE=4 SV=2	C_familiaris	9	74	6
High	F1PCE5	Serpin family A member 1 OS=Canis lupus familiaris OX=9615 GN=SERPINA1 PE=3 SV=3	C_familiaris	9	38	6
High	A0A5F4CP02	Pyruvate kinase OS=Canis lupus familiaris OX=9615 GN=PKM PE=3 SV=1	C_familiaris	7	15	6
High	E2RLS3	Heat shock protein 90 alpha family class B member 1 OS=Canis lupus familiaris OX=9615 GN=HSP90AB1 PE=3 SV=2	C_familiaris	11	20	6
High	L7N0I1	Uncharacterized protein OS=Canis lupus familiaris OX=9615 GN=MYL12B PE=4 SV=1	C_familiaris	8	13	6
High	A0A5F4D3V5	Tubulin beta 1 class VI OS=Canis lupus familiaris OX=9615 GN=TUBB1 PE=3 SV=1	C_familiaris	10	17	6
High	J9NYG8	Complement component 4 binding protein beta OS=Canis lupus familiaris OX=9615 GN=C4BPB PE=4 SV=1	C_familiaris	9	27	6
High	J9P028	Glutathione peroxidase OS=Canis lupus familiaris OX=9615 GN=GPX3 PE=3 SV=2	C_familiaris	11	29	6
High	F6XH46	Glutathione peroxidase OS=Canis lupus familiaris OX=9615 GN=GPX1 PE=3 SV=2	C_familiaris	6	10	6
High	F1P6B7	Annexin OS=Canis lupus familiaris OX=9615 GN=ANXA1 PE=3 SV=1	C_familiaris	6	12	6
High	E2R4H4	Proteasome subunit alpha type OS=Canis lupus familiaris OX=9615 GN=PSMA5 PE=3 SV=3	C_familiaris	8	13	6
High	F1PFG6	Programmed cell death 6 interacting protein OS=Canis lupus familiaris OX=9615 GN=PDCD6IP PE=4 SV=3	C_familiaris	7	12	6
High	E2RQF8	Extracellular matrix protein 1 OS=Canis lupus familiaris OX=9615 GN=ECM1 PE=4 SV=3	C_familiaris	6	12	6
High	A0A5F4BTH2	Neutrophil cytosolic factor 2 OS=Canis lupus familiaris OX=9615 GN=NCF2 PE=3 SV=1	C_familiaris	6	11	6
High	F1PTI2	Uncharacterized protein OS=Canis lupus familiaris OX=9615 GN=BTNL10 PE=3 SV=3	C_familiaris	7	11	6
High	E2R5H4	Integrin-linked protein kinase OS=Canis lupus familiaris OX=9615 GN=ILK PE=4 SV=1	C_familiaris	8	14	6
High	E2RCP9	26S proteasome non-ATPase regulatory subunit 2 OS=Canis lupus familiaris OX=9615 GN=PSMD2 PE=3 SV=1	C_familiaris	7	7	6
High	A0A5F4BRR8	Stomatin OS=Canis lupus familiaris OX=9615 GN=STOM PE=3 SV=1	C_familiaris	6	12	6
High	A0A5F4CZ37	Monocarboxylate transporter 2 OS=Canis lupus familiaris OX=9615 GN=SLC16A7 PE=3 SV=1	C_familiaris	7	16	6
High	E2RBB8	Tyrosine-protein kinase OS=Canis lupus familiaris OX=9615 GN=LYN PE=3 SV=3	C_familiaris	6	8	6
High	A0A5F4C8J6	Ubiquitin carboxyl-terminal hydrolase OS=Canis lupus familiaris OX=9615 GN=USP14 PE=3 SV=1	C_familiaris	6	10	6
High	Q28294	Guanine nucleotide-binding protein G(q) subunit alpha OS=Canis lupus familiaris OX=9615 GN=GNAQ PE=2 SV=2	C_familiaris	6	9	6
High	J9NZX7	Malic enzyme OS=Canis lupus familiaris OX=9615 GN=ME1 PE=3 SV=2	C_familiaris	7	11	6
High	A0A5F4BQI1	Actin-related protein 2/3 complex subunit 4 OS=Canis lupus familiaris OX=9615 GN=ARPC4 PE=3 SV=1	C_familiaris	6	12	6
High	E2QWN7	Lymphocyte cytosolic protein 1 OS=Canis lupus familiaris OX=9615 GN=LCP1 PE=4 SV=2	C_familiaris	6	12	6
High	E2RDX2	Charged multivesicular body protein 4B OS=Canis lupus familiaris OX=9615 GN=CHMP4B PE=3 SV=1	C_familiaris	6	10	6
High	F1PZA0	Delta-aminolevulinic acid dehydratase OS=Canis lupus familiaris OX=9615 GN=ALAD PE=3 SV=2	C_familiaris	6	9	6
High	F6UYJ9	Calreticulin OS=Canis lupus familiaris OX=9615 GN=CALR PE=3 SV=2	C_familiaris	6	7	6
High	E2QW60	Lectin, mannose binding 1 OS=Canis lupus familiaris OX=9615 GN=LMAN1 PE=4 SV=2	C_familiaris	7	10	6
High	F1P914	Major vault protein OS=Canis lupus familiaris OX=9615 GN=MVP PE=4 SV=3	C_familiaris	6	8	6
High	E2RE76	Apolipoprotein A-IV OS=Canis lupus familiaris OX=9615 GN=APOA4 PE=3 SV=2	C_familiaris	18	51	5
High	E2RJC2	Complement C1q C chain OS=Canis lupus familiaris OX=9615 GN=C1QC PE=4 SV=2	C_familiaris	11	55	5
High	J9P983	Exostosin like glycosyltransferase 2 OS=Canis lupus familiaris OX=9615 GN=EXTL2 PE=4 SV=2	C_familiaris	13	49	5
High	E2RNG3	Carboxypeptidase N subunit 1 OS=Canis lupus familiaris OX=9615 GN=CPN1 PE=3 SV=2	C_familiaris	6	12	5
High	J9JHH5	Joining chain of multimeric IgA and IgM OS=Canis lupus familiaris OX=9615 GN=JCHAIN PE=4 SV=1	C_familiaris	8	44	5
High	J9PAX5	Ig-like domain-containing protein OS=Canis lupus familiaris OX=9615 PE=4 SV=2	C_familiaris	16	101	5
High	E2RD65	Actin-related protein 2/3 complex subunit 5 OS=Canis lupus familiaris OX=9615 GN=ARPC5 PE=3 SV=3	C_familiaris	5	14	5
High	A0A5F4CHH4	Pleckstrin OS=Canis lupus familiaris OX=9615 GN=PLEK PE=4 SV=1	C_familiaris	6	14	5
High	F1P7P3	F-actin-capping protein subunit alpha OS=Canis lupus familiaris OX=9615 GN=CAPZA1 PE=3 SV=2	C_familiaris	6	10	5
High	A0A5F4BQH7	Chromosome 9 C17orf99 homolog OS=Canis lupus familiaris OX=9615 GN=C9H17orf99 PE=4 SV=1	C_familiaris	5	12	5
High	A0A5F4BSQ8	Karyopherin subunit beta 1 OS=Canis lupus familiaris OX=9615 GN=KPNB1 PE=3 SV=1	C_familiaris	5	8	5
High	E2R0D2	Scavenger receptor cysteine rich family member with 5 domains OS=Canis lupus familiaris OX=9615 GN=SSC5D PE=4 SV=3	C_familiaris	5	9	5
High	E2QUU5	60 kDa chaperonin OS=Canis lupus familiaris OX=9615 GN=HSPD1 PE=3 SV=2	C_familiaris	5	13	5
High	A0A5F4DCD2	Ig-like domain-containing protein OS=Canis lupus familiaris OX=9615 GN=DLA-64 PE=3 SV=1	C_familiaris	5	8	5
High	A0A5F4C6I3	Bridging integrator 1 OS=Canis lupus familiaris OX=9615 GN=BIN1 PE=4 SV=1	C_familiaris	6	12	5
High	F1PCG4	Peroxiredoxin 2 OS=Canis lupus familiaris OX=9615 GN=PRDX2 PE=3 SV=2	C_familiaris	8	19	5
High	J9P0L5	Histone H2A OS=Canis lupus familiaris OX=9615 GN=H2AC18 PE=3 SV=1	C_familiaris	5	11	5
High	E2RQY6	Calcium-transporting ATPase OS=Canis lupus familiaris OX=9615 GN=ATP2A3 PE=3 SV=2	C_familiaris	6	9	5
High	A0A5F4CDY4	LIM and senescent cell antigen-like-containing domain protein OS=Canis lupus familiaris OX=9615 GN=LIMS1 PE=4 SV=1	C_familiaris	5	10	5
High	F1PAF3	Hepatocyte growth factor activator OS=Canis lupus familiaris OX=9615 GN=HGFAC PE=4 SV=2	C_familiaris	5	8	5
High	A0A5F4D8T6	AIR carboxylase OS=Canis lupus familiaris OX=9615 GN=PAICS PE=3 SV=1	C_familiaris	6	13	5
High	F1PK62	Peptidyl-prolyl cis-trans isomerase OS=Canis lupus familiaris OX=9615 PE=3 SV=2	C_familiaris	7	13	5
High	F1PRC5	Aamy domain-containing protein OS=Canis lupus familiaris OX=9615 GN=SLC3A2 PE=4 SV=2	C_familiaris	5	11	5
High	E2RNG2	ATP synthase subunit alpha OS=Canis lupus familiaris OX=9615 GN=ATP5F1A PE=3 SV=2	C_familiaris	5	9	5
High	F1PP71	Junctional adhesion molecule 1 OS=Canis lupus familiaris OX=9615 GN=F11R PE=3 SV=3	C_familiaris	6	12	5
High	A0A5F4DBF8	V-type proton ATPase subunit a OS=Canis lupus familiaris OX=9615 GN=ATP6V0A1 PE=3 SV=1	C_familiaris	5	8	5
High	A0A5F4D0L8	Septin 6 OS=Canis lupus familiaris OX=9615 GN=SEPTIN6 PE=3 SV=1	C_familiaris	5	8	5
High	F1P9U4	Dihydropyrimidinase-related protein 2 OS=Canis lupus familiaris OX=9615 GN=DPYSL2 PE=3 SV=2	C_familiaris	6	9	5
High	J9P4J8	Complement factor H related 5 OS=Canis lupus familiaris OX=9615 GN=CFHR5 PE=4 SV=2	C_familiaris	6	9	5
High	F1PEM7	Insulin-like growth factor-binding protein 2 OS=Canis lupus familiaris OX=9615 GN=IGFBP2 PE=4 SV=2	C_familiaris	6	11	5
High	F1PPL9	C1q domain-containing protein OS=Canis lupus familiaris OX=9615 GN=C1QTNF3 PE=4 SV=3	C_familiaris	5	12	5
High	F6XNH4	C-1-tetrahydrofolate synthase, cytoplasmic OS=Canis lupus familiaris OX=9615 GN=MTHFD1 PE=3 SV=2	C_familiaris	5	6	5
High	F1PKR0	Uncharacterized protein OS=Canis lupus familiaris OX=9615 GN=SDCBP PE=4 SV=3	C_familiaris	6	8	5
High	E2QV08	Malate dehydrogenase OS=Canis lupus familiaris OX=9615 GN=MDH1 PE=3 SV=3	C_familiaris	5	9	5
High	Q5QQ50	Xylosyltransferase 2 OS=Canis lupus familiaris OX=9615 GN=XYLT2 PE=2 SV=1	C_familiaris	5	8	5
High	E2R691	Protein-arginine deiminase OS=Canis lupus familiaris OX=9615 GN=PADI3 PE=3 SV=2	C_familiaris	5	7	5
High	A0A5F4C0D1	Complement C1q subcomponent subunit A OS=Canis lupus familiaris OX=9615 GN=C1QA PE=4 SV=1	C_familiaris	6	17	5
High	E2RI17	Sorcin OS=Canis lupus familiaris OX=9615 GN=SRI PE=4 SV=3	C_familiaris	6	10	5
High	P62825	GTP-binding nuclear protein Ran OS=Canis lupus familiaris OX=9615 GN=RAN PE=1 SV=3	C_familiaris	5	12	5
High	Q1HE58	Ras-related protein Rab-27A OS=Canis lupus familiaris OX=9615 GN=RAB27A PE=2 SV=1	C_familiaris	5	7	5
High	A0A5F4C3X9	Actinin alpha 4 OS=Canis lupus familiaris OX=9615 GN=ACTN4 PE=3 SV=1	C_familiaris	33	75	4
High	F1PQ85	Mannan binding lectin serine peptidase 1 OS=Canis lupus familiaris OX=9615 GN=MASP1 PE=4 SV=3	C_familiaris	14	34	4
High	E2QUV3	Alpha-2-HS-glycoprotein OS=Canis lupus familiaris OX=9615 GN=AHSG PE=4 SV=2	C_familiaris	8	12	4
High	A0A5F4BR98	Ig-like domain-containing protein OS=Canis lupus familiaris OX=9615 PE=4 SV=1	C_familiaris	19	138	4
High	A0A5F4DER9	Aquaporin-1 OS=Canis lupus familiaris OX=9615 GN=AQP1 PE=3 SV=1	C_familiaris	8	28	4
High	P62872	Guanine nucleotide-binding protein G(I)/G(S)/G(T) subunit beta-1 OS=Canis lupus familiaris OX=9615 GN=GNB1 PE=2 SV=3	C_familiaris	9	17	4
High	Q53VB8	Ferritin light chain OS=Canis lupus familiaris OX=9615 GN=FTL PE=2 SV=3	C_familiaris	5	8	4
High	F1PFM6	Collagen type VI alpha 1 chain OS=Canis lupus familiaris OX=9615 GN=COL6A1 PE=4 SV=2	C_familiaris	6	15	4
High	A0A5F4DJC7	Ig-like domain-containing protein OS=Canis lupus familiaris OX=9615 PE=4 SV=1	C_familiaris	9	38	4
High	F6XKC0	Complement C8 gamma chain OS=Canis lupus familiaris OX=9615 GN=C8G PE=3 SV=2	C_familiaris	6	11	4
High	E2RB38	Tropomyosin 3 OS=Canis lupus familiaris OX=9615 GN=TPM3 PE=3 SV=2	C_familiaris	7	13	4
High	A0A5F4C586	Transthyretin OS=Canis lupus familiaris OX=9615 GN=TTR PE=3 SV=1	C_familiaris	4	10	4
High	A0A5F4DDG2	Myristoylated alanine rich protein kinase C substrate OS=Canis lupus familiaris OX=9615 GN=MARCKS PE=3 SV=1	C_familiaris	5	10	4
High	A0A5F4DDR9	Ras-related protein Rab-5C OS=Canis lupus familiaris OX=9615 GN=RAB5C PE=4 SV=1	C_familiaris	4	7	4
High	A0A5F4BXP7	Alpha-1,4 glucan phosphorylase OS=Canis lupus familiaris OX=9615 GN=PYGB PE=3 SV=1	C_familiaris	5	7	4
High	E2R0B6	Proteasome subunit beta OS=Canis lupus familiaris OX=9615 GN=PSMB6 PE=3 SV=1	C_familiaris	5	12	4
High	F1PAL5	Angiotensin 1-10 OS=Canis lupus familiaris OX=9615 GN=AGT PE=3 SV=3	C_familiaris	5	7	4
High	Q8MJD1	Neutrophil elastase OS=Canis lupus familiaris OX=9615 GN=ELA2 PE=2 SV=1	C_familiaris	5	10	4
High	A0A5F4BUJ7	Ig-like domain-containing protein OS=Canis lupus familiaris OX=9615 PE=4 SV=1	C_familiaris	4	18	4
High	E2R0K4	Ras-related protein Rab-14 OS=Canis lupus familiaris OX=9615 GN=RAB14 PE=3 SV=1	C_familiaris	5	10	4
High	P60952	Cell division control protein 42 homolog OS=Canis lupus familiaris OX=9615 GN=CDC42 PE=2 SV=2	C_familiaris	6	10	4
High	P05124	Creatine kinase B-type OS=Canis lupus familiaris OX=9615 GN=CKB PE=1 SV=1	C_familiaris	4	6	4
High	F1Q057	Peroxidase OS=Canis lupus familiaris OX=9615 GN=PXDN PE=4 SV=3	C_familiaris	5	6	4
High	F6USM4	Mannan binding lectin serine peptidase 2 OS=Canis lupus familiaris OX=9615 GN=MASP2 PE=4 SV=1	C_familiaris	4	6	4
High	A0A5F4DKK2	Attractin OS=Canis lupus familiaris OX=9615 GN=ATRN PE=4 SV=1	C_familiaris	4	6	4
High	F1Q4A4	Coagulation factor VII OS=Canis lupus familiaris OX=9615 GN=F10 PE=4 SV=3	C_familiaris	4	5	4
High	F1PD34	Secreted phosphoprotein 2 OS=Canis lupus familiaris OX=9615 GN=SPP2 PE=3 SV=2	C_familiaris	4	7	4
High	J9NT73	Brain abundant membrane attached signal protein 1 OS=Canis lupus familiaris OX=9615 GN=BASP1 PE=3 SV=2	C_familiaris	4	5	4
High	A0A5F4CKY1	A-kinase anchoring protein 12 OS=Canis lupus familiaris OX=9615 GN=AKAP12 PE=4 SV=1	C_familiaris	4	6	4
High	J9P988	2'-phospho-ADP-ribosyl cyclase OS=Canis lupus familiaris OX=9615 GN=CD38 PE=3 SV=2	C_familiaris	4	7	4
High	E2R002	15-oxoprostaglandin 13-reductase OS=Canis lupus familiaris OX=9615 GN=PTGR1 PE=3 SV=2	C_familiaris	4	7	4
High	E2RT65	Phosphoglycerate mutase OS=Canis lupus familiaris OX=9615 GN=PGAM1 PE=3 SV=2	C_familiaris	4	5	4
High	F1P6D7	Integrin-associated protein OS=Canis lupus familiaris OX=9615 GN=CD47 PE=4 SV=3	C_familiaris	6	9	4
High	E2R115	CD226 molecule OS=Canis lupus familiaris OX=9615 GN=CD226 PE=4 SV=2	C_familiaris	4	6	4
High	J9P7S1	Kell metallo-endopeptidase OS=Canis lupus familiaris OX=9615 GN=KEL PE=4 SV=2	C_familiaris	4	7	4
High	F1PG85	Solute carrier family 44 member 2 OS=Canis lupus familiaris OX=9615 GN=SLC44A2 PE=3 SV=3	C_familiaris	4	7	4
High	E2R985	Actin-related protein 2/3 complex subunit 3 OS=Canis lupus familiaris OX=9615 GN=ARPC3 PE=3 SV=3	C_familiaris	5	10	4
High	A0A5F4C3T9	Phosphatidylcholine transfer protein OS=Canis lupus familiaris OX=9615 GN=PCTP PE=4 SV=1	C_familiaris	5	6	4
High	E2RC10	Synaptophysin like 1 OS=Canis lupus familiaris OX=9615 GN=SYPL1 PE=3 SV=3	C_familiaris	4	8	4
High	Q8HZM5	Glutamine synthetase OS=Canis lupus familiaris OX=9615 GN=GLUL PE=1 SV=3	C_familiaris	4	5	4
High	P81709	Lysozyme C, spleen isozyme OS=Canis lupus familiaris OX=9615 PE=1 SV=1	C_familiaris	4	6	4
High	A0A5F4CST2	Tetraspanin OS=Canis lupus familiaris OX=9615 GN=TSPAN14 PE=3 SV=1	C_familiaris	4	8	4
High	A0A5F4CN31	Glucose-6-phosphate isomerase OS=Canis lupus familiaris OX=9615 GN=GPI PE=3 SV=1	C_familiaris	4	4	4
High	J9NTL5	Glycoprotein Ib platelet subunit beta OS=Canis lupus familiaris OX=9615 GN=GP1BB PE=4 SV=2	C_familiaris	4	8	4
High	A0A5F4C3L7	Milk fat globule-EGF factor 8 protein OS=Canis lupus familiaris OX=9615 GN=MFGE8 PE=4 SV=1	C_familiaris	4	10	4
High	F1P7V6	Stress induced phosphoprotein 1 OS=Canis lupus familiaris OX=9615 GN=STIP1 PE=4 SV=3	C_familiaris	4	6	4
High	E2RTE8	6-pyruvoyl tetrahydrobiopterin synthase OS=Canis lupus familiaris OX=9615 GN=PTS PE=3 SV=1	C_familiaris	4	11	4
High	A0A5F4D182	Serine hydroxymethyltransferase OS=Canis lupus familiaris OX=9615 GN=SHMT1 PE=3 SV=1	C_familiaris	4	5	4
High	E2QXQ9	Tropomodulin 1 OS=Canis lupus familiaris OX=9615 GN=TMOD1 PE=4 SV=1	C_familiaris	4	6	4
High	F1PC59	Peroxiredoxin-6 OS=Canis lupus familiaris OX=9615 GN=PRDX6 PE=3 SV=2	C_familiaris	4	5	4
High	F1PNS6	Peptidase D OS=Canis lupus familiaris OX=9615 GN=PEPD PE=3 SV=3	C_familiaris	4	5	4
High	A0A5F4CWM0	Diaphanous related formin 1 OS=Canis lupus familiaris OX=9615 GN=DIAPH1 PE=3 SV=1	C_familiaris	4	6	4
High	A0A5F4D0P1	Band 4.1 OS=Canis lupus familiaris OX=9615 GN=EPB41 PE=4 SV=1	C_familiaris	28	98	3
High	P60524	Hemoglobin subunit beta OS=Canis lupus familiaris OX=9615 GN=HBB PE=1 SV=1	C_familiaris	21	404	3
High	F2Z4N7	Actin alpha cardiac muscle 1 OS=Canis lupus familiaris OX=9615 GN=ACTC1 PE=3 SV=2	C_familiaris	22	90	3
High	E2R2K4	RAP1B, member of RAS oncogene family OS=Canis lupus familiaris OX=9615 GN=RAP1B PE=3 SV=1	C_familiaris	15	42	3
High	F1PWQ0	Rab GDP dissociation inhibitor OS=Canis lupus familiaris OX=9615 GN=GDI1 PE=3 SV=2	C_familiaris	11	14	3
High	J9NY02	Ig-like domain-containing protein OS=Canis lupus familiaris OX=9615 PE=4 SV=2	C_familiaris	17	116	3
High	A0A5F4DAX5	Ig-like domain-containing protein OS=Canis lupus familiaris OX=9615 PE=4 SV=1	C_familiaris	6	23	3
High	A0A5F4BYG2	Ig-like domain-containing protein OS=Canis lupus familiaris OX=9615 PE=4 SV=1	C_familiaris	6	31	3
High	A0A5F4DCY9	Ig-like domain-containing protein OS=Canis lupus familiaris OX=9615 PE=4 SV=1	C_familiaris	6	54	3
High	E2RD95	G protein subunit beta 2 OS=Canis lupus familiaris OX=9615 GN=GNB2 PE=3 SV=1	C_familiaris	8	15	3
High	F1PUB5	Proteasome subunit alpha 7 OS=Canis lupus familiaris OX=9615 GN=PSMA7 PE=3 SV=3	C_familiaris	7	25	3
High	E2RKR4	Proteasome subunit alpha type OS=Canis lupus familiaris OX=9615 GN=PSMA3 PE=3 SV=2	C_familiaris	9	29	3
High	A0A5F4BU46	Histone H2B OS=Canis lupus familiaris OX=9615 PE=3 SV=1	C_familiaris	9	15	3
High	F1PDQ4	Cytoplasmic FMR1-interacting protein OS=Canis lupus familiaris OX=9615 GN=CYFIP1 PE=3 SV=3	C_familiaris	8	12	3
High	E2RGQ8	Ig-like domain-containing protein OS=Canis lupus familiaris OX=9615 PE=4 SV=3	C_familiaris	5	17	3
High	J9NX46	Clathrin light chain A OS=Canis lupus familiaris OX=9615 GN=CLTA PE=4 SV=1	C_familiaris	3	8	3
High	F1Q3I5	Collagen alpha-1(I) chain OS=Canis lupus familiaris OX=9615 GN=COL1A1 PE=4 SV=3	C_familiaris	5	8	3
High	A0A5F4D9M4	Uncharacterized protein OS=Canis lupus familiaris OX=9615 GN=ARF3 PE=3 SV=1	C_familiaris	4	5	3
High	A7VLI5	Glycophorin C OS=Canis lupus familiaris OX=9615 GN=Gypc PE=2 SV=1	C_familiaris	5	11	3
High	A0A5F4C7L7	Tetraspanin OS=Canis lupus familiaris OX=9615 GN=TSPAN9 PE=3 SV=1	C_familiaris	6	14	3
High	A0A5F4C8H0	Glucosamine-6-phosphate isomerase OS=Canis lupus familiaris OX=9615 GN=GNPDA2 PE=3 SV=1	C_familiaris	5	13	3
High	A0A5F4DGD5	Ig-like domain-containing protein OS=Canis lupus familiaris OX=9615 PE=4 SV=1	C_familiaris	5	19	3
High	E2RSI6	FERM domain-containing protein OS=Canis lupus familiaris OX=9615 GN=EZR PE=4 SV=1	C_familiaris	8	17	3
High	J9P6K0	Ras-related protein Rap-2 OS=Canis lupus familiaris OX=9615 GN=RAP2A PE=3 SV=2	C_familiaris	4	5	3
High	A0A5F4BQ47	Phospholipid transfer protein OS=Canis lupus familiaris OX=9615 GN=PLTP PE=3 SV=1	C_familiaris	4	7	3
High	A0A5F4CP54	Ig-like domain-containing protein OS=Canis lupus familiaris OX=9615 PE=4 SV=1	C_familiaris	5	11	3
High	F1PTZ5	CD44 antigen OS=Canis lupus familiaris OX=9615 GN=CD44 PE=4 SV=3	C_familiaris	6	8	3
High	E2RHG2	Peroxiredoxin-1 OS=Canis lupus familiaris OX=9615 GN=PRDX1 PE=3 SV=2	C_familiaris	7	10	3
High	E2QWR0	Surfactant protein D OS=Canis lupus familiaris OX=9615 GN=SFTPD PE=3 SV=1	C_familiaris	3	5	3
High	F1PF90	Ig-like domain-containing protein OS=Canis lupus familiaris OX=9615 PE=4 SV=3	C_familiaris	4	14	3
High	A0A5F4DAC6	Neuropilin 1 OS=Canis lupus familiaris OX=9615 GN=NRP1 PE=3 SV=1	C_familiaris	4	5	3
High	A0A5F4DFV1	Apolipoprotein C-III OS=Canis lupus familiaris OX=9615 GN=APOC3 PE=3 SV=1	C_familiaris	3	13	3
High	Q3BCQ5	Ammonium transporter Rh type A OS=Canis lupus familiaris OX=9615 GN=RHAG PE=2 SV=1	C_familiaris	3	17	3
High	F1PH61	Ig-like domain-containing protein OS=Canis lupus familiaris OX=9615 PE=4 SV=3	C_familiaris	4	9	3
High	J9PA20	Glutamate dehydrogenase (NAD(P)(+)) OS=Canis lupus familiaris OX=9615 PE=3 SV=2	C_familiaris	4	8	3
High	A0A5F4C9I1	Annexin OS=Canis lupus familiaris OX=9615 GN=ANXA2 PE=3 SV=1	C_familiaris	3	3	3
High	F1P9K6	Junctional adhesion molecule 3 OS=Canis lupus familiaris OX=9615 GN=JAM3 PE=4 SV=2	C_familiaris	3	8	3
High	J9P884	Versican OS=Canis lupus familiaris OX=9615 GN=VCAN PE=3 SV=1	C_familiaris	3	4	3
High	E2REF3	Solute carrier family 14 member 1 OS=Canis lupus familiaris OX=9615 GN=SLC14A1 PE=3 SV=3	C_familiaris	6	9	3
High	E2RLB2	Small monomeric GTPase OS=Canis lupus familiaris OX=9615 GN=RALB PE=3 SV=1	C_familiaris	4	7	3
High	E2R413	Macrophage-capping protein OS=Canis lupus familiaris OX=9615 GN=CAPG PE=3 SV=3	C_familiaris	4	5	3
High	L7N0L3	Histone H4 OS=Canis lupus familiaris OX=9615 GN=H4C7 PE=3 SV=2	C_familiaris	4	7	3
High	A0A5F4DB26	Christmas factor OS=Canis lupus familiaris OX=9615 GN=F9 PE=4 SV=1	C_familiaris	3	4	3
High	A0A5F4CNH1	Thromboxane A synthase 1 OS=Canis lupus familiaris OX=9615 GN=TBXAS1 PE=3 SV=1	C_familiaris	3	5	3
High	A0A5F4D061	Solute carrier family 2, facilitated glucose transporter member 3 OS=Canis lupus familiaris OX=9615 GN=SLC2A3 PE=3 SV=1	C_familiaris	4	8	3
High	A0A5F4DJ85	Rho GDP dissociation inhibitor alpha OS=Canis lupus familiaris OX=9615 GN=ARHGDIA PE=3 SV=1	C_familiaris	4	6	3
High	F1Q260	Lysosomal associated membrane protein 1 OS=Canis lupus familiaris OX=9615 GN=LAMP1 PE=3 SV=3	C_familiaris	3	4	3
High	F1PPH7	26S proteasome AAA-ATPase subunit RPT1 OS=Canis lupus familiaris OX=9615 GN=PSMC2 PE=3 SV=2	C_familiaris	3	5	3
High	A0A5F4CWT6	Arrestin beta 1 OS=Canis lupus familiaris OX=9615 GN=ARRB1 PE=3 SV=1	C_familiaris	3	6	3
High	E2RQ71	Apolipoprotein M OS=Canis lupus familiaris OX=9615 GN=APOM PE=3 SV=2	C_familiaris	3	4	3
High	A0A5F4DDV1	Periostin OS=Canis lupus familiaris OX=9615 GN=POSTN PE=4 SV=1	C_familiaris	3	5	3
High	F1PHK9	Laminin subunit gamma 1 OS=Canis lupus familiaris OX=9615 GN=LAMC1 PE=4 SV=2	C_familiaris	3	3	3
High	F1Q3C4	Glutathione transferase OS=Canis lupus familiaris OX=9615 GN=LOC479912 PE=3 SV=3	C_familiaris	3	3	3
High	F1PDG4	Uncharacterized protein OS=Canis lupus familiaris OX=9615 GN=UBB PE=4 SV=2	C_familiaris	3	14	3
High	E2QW34	Proteasome subunit beta OS=Canis lupus familiaris OX=9615 GN=PSMB2 PE=3 SV=1	C_familiaris	4	6	3
High	A0A5F4D881	Sushi domain containing 1 OS=Canis lupus familiaris OX=9615 GN=SUSD1 PE=4 SV=1	C_familiaris	3	3	3
High	F1P9A7	Protein tweety homolog OS=Canis lupus familiaris OX=9615 GN=TTYH3 PE=3 SV=3	C_familiaris	3	4	3
High	F1PKF1	Cell cycle control protein OS=Canis lupus familiaris OX=9615 GN=TMEM30A PE=3 SV=3	C_familiaris	3	5	3
High	A0A5F4CKE9	Microtubule-associated protein OS=Canis lupus familiaris OX=9615 GN=MAP4 PE=4 SV=1	C_familiaris	3	4	3
High	E2QY31	Platelet-activating factor acetylhydrolase IB subunit alpha OS=Canis lupus familiaris OX=9615 GN=PAFAH1B1 PE=3 SV=1	C_familiaris	3	4	3
High	F1PE09	6-phosphogluconate dehydrogenase, decarboxylating OS=Canis lupus familiaris OX=9615 GN=PGD PE=3 SV=3	C_familiaris	3	5	3
High	E2R516	Synaptosomal-associated protein OS=Canis lupus familiaris OX=9615 GN=SNAP23 PE=3 SV=1	C_familiaris	3	4	3
High	A0A5F4DCB6	Nucleosome assembly protein 1 like 1 OS=Canis lupus familiaris OX=9615 GN=NAP1L1 PE=3 SV=1	C_familiaris	3	7	3
High	A0A5F4CF70	Solute carrier family 38 member 10 OS=Canis lupus familiaris OX=9615 GN=SLC38A10 PE=4 SV=1	C_familiaris	3	5	3
High	F1P6A2	92 kDa gelatinase OS=Canis lupus familiaris OX=9615 GN=MMP9 PE=3 SV=3	C_familiaris	3	6	3
High	F6X7V8	Erythroblast membrane associated protein OS=Canis lupus familiaris OX=9615 GN=ERMAP PE=3 SV=2	C_familiaris	3	8	3
High	F1PAF2	Activating transcription factor 6 OS=Canis lupus familiaris OX=9615 GN=ATF6 PE=4 SV=3	C_familiaris	3	5	3
High	A0A5F4BSW0	Voltage-dependent anion-selective channel protein 3 OS=Canis lupus familiaris OX=9615 PE=3 SV=1	C_familiaris	3	5	3
High	J9P064	Collectin subfamily member 10 OS=Canis lupus familiaris OX=9615 GN=COLEC10 PE=4 SV=1	C_familiaris	3	4	3
High	Q5W416	Proteasome subunit beta type-8 OS=Canis lupus familiaris OX=9615 GN=PSMB8 PE=1 SV=1	C_familiaris	4	4	3
High	F1PEK5	Septin-2 OS=Canis lupus familiaris OX=9615 GN=SEPTIN2 PE=3 SV=3	C_familiaris	3	3	3
High	J9P9M0	Ras-related protein Rab OS=Canis lupus familiaris OX=9615 GN=RAB32 PE=3 SV=2	C_familiaris	3	4	3
High	E2RLK6	Adiponectin F1 OS=Canis lupus familiaris OX=9615 GN=LOC609026 PE=4 SV=1	C_familiaris	3	3	3
High	E2RB79	T-complex protein 1 subunit gamma OS=Canis lupus familiaris OX=9615 GN=CCT3 PE=3 SV=3	C_familiaris	3	5	3
High	E2RMF9	Serpin family A member 5 OS=Canis lupus familiaris OX=9615 GN=SERPINA5 PE=3 SV=2	C_familiaris	3	5	3
High	A0A5F4D0H5	Tyrosine-protein kinase OS=Canis lupus familiaris OX=9615 GN=SRC PE=3 SV=1	C_familiaris	3	7	3
High	A0A5F4CFZ9	Cathelicidin antimicrobial peptide OS=Canis lupus familiaris OX=9615 GN=CAMP PE=3 SV=1	C_familiaris	3	5	3
High	A0A5F4CTU1	Septin-7 OS=Canis lupus familiaris OX=9615 GN=SEPTIN7 PE=3 SV=1	C_familiaris	3	5	3
High	A0A5F4CE65	GMP reductase OS=Canis lupus familiaris OX=9615 GN=GMPR2 PE=3 SV=1	C_familiaris	5	9	3
High	E2RPJ4	Glutamate--cysteine ligase OS=Canis lupus familiaris OX=9615 GN=GCLC PE=3 SV=3	C_familiaris	3	3	3
High	F1Q0S2	Sodium/potassium-transporting ATPase subunit beta OS=Canis lupus familiaris OX=9615 GN=ATP1B3 PE=3 SV=3	C_familiaris	3	5	3
High	F1PIT4	Tetraspanin OS=Canis lupus familiaris OX=9615 GN=CD63 PE=3 SV=2	C_familiaris	3	9	3
High	F1P7F8	Zyxin OS=Canis lupus familiaris OX=9615 GN=ZYX PE=4 SV=3	C_familiaris	3	3	3
High	F1PXF9	Hemicentin 1 OS=Canis lupus familiaris OX=9615 GN=HMCN1 PE=4 SV=2	C_familiaris	3	3	3
High	J9P9V8	Tetraspanin OS=Canis lupus familiaris OX=9615 GN=CD82 PE=3 SV=2	C_familiaris	3	3	3
High	J9NTG7	CD55 molecule OS=Canis lupus familiaris OX=9615 GN=CD55 PE=4 SV=2	C_familiaris	3	4	3
High	F6Y713	Alpha-1-acid glycoprotein OS=Canis lupus familiaris OX=9615 GN=LOC100685620 PE=3 SV=1	C_familiaris	3	6	3
High	E2RPE3	IST1 homolog OS=Canis lupus familiaris OX=9615 GN=IST1 PE=3 SV=1	C_familiaris	3	5	3
High	A0A5F4D6V1	Carboxypeptidase B2 OS=Canis lupus familiaris OX=9615 GN=CPB2 PE=3 SV=1	C_familiaris	3	5	3
High	P30804	Adenylate cyclase type 6 OS=Canis lupus familiaris OX=9615 GN=ADCY6 PE=1 SV=1	C_familiaris	3	4	3
High	J9P8M2	Fibronectin OS=Canis lupus familiaris OX=9615 GN=FN1 PE=4 SV=2	C_familiaris	156	613	2
High	A0A5F4D5S9	Fibronectin OS=Canis lupus familiaris OX=9615 GN=FN1 PE=4 SV=1	C_familiaris	153	602	2
High	F2Z4Q6	Serum albumin OS=Canis lupus familiaris OX=9615 GN=AFP PE=4 SV=2	C_familiaris	68	1209	2
High	A0A5F4BYJ5	Uncharacterized protein OS=Canis lupus familiaris OX=9615 PE=4 SV=1	C_familiaris	45	474	2
High	A0A5F4BNP2	Uncharacterized protein OS=Canis lupus familiaris OX=9615 PE=4 SV=1	C_familiaris	43	482	2
High	F1PYZ1	Uncharacterized protein OS=Canis lupus familiaris OX=9615 GN=LOC609402 PE=3 SV=3	C_familiaris	21	374	2
High	E2R886	Kininogen 1 OS=Canis lupus familiaris OX=9615 GN=KNG1 PE=4 SV=3	C_familiaris	22	76	2
High	F1PBT3	Fructose-bisphosphate aldolase OS=Canis lupus familiaris OX=9615 GN=ALDOA PE=3 SV=3	C_familiaris	14	46	2
High	P60529	Hemoglobin subunit alpha OS=Canis lupus familiaris OX=9615 GN=HBA PE=1 SV=1	C_familiaris	11	324	2
High	E2RNL3	Peroxiredoxin 4 OS=Canis lupus familiaris OX=9615 GN=PRDX4 PE=4 SV=2	C_familiaris	12	40	2
High	A0A5F4CSF0	Ig-like domain-containing protein OS=Canis lupus familiaris OX=9615 PE=4 SV=1	C_familiaris	18	171	2
High	A0A5F4CWK7	Ig-like domain-containing protein OS=Canis lupus familiaris OX=9615 PE=4 SV=1	C_familiaris	11	77	2
High	F1PXU1	Spectrin beta chain OS=Canis lupus familiaris OX=9615 GN=SPTBN1 PE=3 SV=3	C_familiaris	8	25	2
High	A0A5F4D2F2	Ig-like domain-containing protein OS=Canis lupus familiaris OX=9615 PE=4 SV=1	C_familiaris	16	130	2
High	A0A5F4CSD5	Ig-like domain-containing protein OS=Canis lupus familiaris OX=9615 PE=4 SV=1	C_familiaris	13	136	2
High	A0A5F4DCA5	Ig-like domain-containing protein OS=Canis lupus familiaris OX=9615 PE=4 SV=1	C_familiaris	7	36	2
High	A0A5F4CSP7	Ig-like domain-containing protein OS=Canis lupus familiaris OX=9615 PE=4 SV=1	C_familiaris	7	42	2
High	L7N0I0	Ig-like domain-containing protein OS=Canis lupus familiaris OX=9615 PE=4 SV=2	C_familiaris	15	106	2
High	A0A5F4CH63	Ig-like domain-containing protein OS=Canis lupus familiaris OX=9615 PE=4 SV=1	C_familiaris	5	48	2
High	A0A5F4DFV6	Fc receptor like 4 OS=Canis lupus familiaris OX=9615 GN=FCRL4 PE=4 SV=1	C_familiaris	4	17	2
High	A0A5F4CUN8	RAB1B, member RAS oncogene family OS=Canis lupus familiaris OX=9615 GN=RAB1B PE=4 SV=1	C_familiaris	8	18	2
High	L7N0G4	Tubulin alpha chain OS=Canis lupus familiaris OX=9615 GN=LOC610636 PE=3 SV=2	C_familiaris	9	19	2
High	A0A5F4DJ18	Ig-like domain-containing protein OS=Canis lupus familiaris OX=9615 PE=4 SV=1	C_familiaris	7	55	2
High	E2RPA8	Tetraspanin OS=Canis lupus familiaris OX=9615 GN=CD151 PE=3 SV=3	C_familiaris	2	10	2
High	P61007	Ras-related protein Rab-8A OS=Canis lupus familiaris OX=9615 GN=RAB8A PE=1 SV=1	C_familiaris	4	11	2
High	J9P889	Collagen type VI alpha 1 chain OS=Canis lupus familiaris OX=9615 GN=COL6A1 PE=4 SV=2	C_familiaris	4	11	2
High	E2QYX1	Phosphoglycerate mutase OS=Canis lupus familiaris OX=9615 GN=BPGM PE=3 SV=1	C_familiaris	3	8	2
High	P01784	Ig heavy chain V region GOM OS=Canis lupus familiaris OX=9615 PE=1 SV=1	C_familiaris	3	10	2
High	A0A5F4CZV7	Ig-like domain-containing protein OS=Canis lupus familiaris OX=9615 PE=4 SV=1	C_familiaris	4	21	2
High	E2RGB0	Apolipoprotein C-IV OS=Canis lupus familiaris OX=9615 GN=APOC4 PE=3 SV=3	C_familiaris	2	10	2
High	A0A5F4BY22	EF-hand domain-containing protein OS=Canis lupus familiaris OX=9615 GN=S100A9 PE=4 SV=1	C_familiaris	5	16	2
High	F1P6Q0	G protein subunit alpha i3 OS=Canis lupus familiaris OX=9615 GN=GNAI3 PE=4 SV=2	C_familiaris	5	11	2
High	Q50KA9	Nucleoside diphosphate kinase A OS=Canis lupus familiaris OX=9615 GN=NME1 PE=2 SV=1	C_familiaris	3	8	2
High	E2RT39	Maltase-glucoamylase 2 (putative) OS=Canis lupus familiaris OX=9615 GN=MGAM2 PE=3 SV=3	C_familiaris	4	5	2
High	J9NX28	Small monomeric GTPase OS=Canis lupus familiaris OX=9615 GN=RALA PE=3 SV=1	C_familiaris	3	4	2
High	F1PQS2	Metalloproteinase inhibitor 1 OS=Canis lupus familiaris OX=9615 GN=TIMP1 PE=3 SV=2	C_familiaris	2	4	2
High	A0A5F4CQ32	Integrin subunit alpha M OS=Canis lupus familiaris OX=9615 GN=ITGAM PE=3 SV=1	C_familiaris	3	5	2
High	F1PKN5	Ig-like domain-containing protein OS=Canis lupus familiaris OX=9615 PE=4 SV=3	C_familiaris	4	17	2
High	A0A5F4CBH6	Ig-like domain-containing protein OS=Canis lupus familiaris OX=9615 PE=4 SV=1	C_familiaris	5	34	2
High	A0A5F4BSL9	Uncharacterized protein OS=Canis lupus familiaris OX=9615 PE=3 SV=1	C_familiaris	3	7	2
High	F1PQS8	CKLF like MARVEL transmembrane domain containing 6 OS=Canis lupus familiaris OX=9615 GN=CMTM6 PE=2 SV=2	C_familiaris	2	5	2
High	J9P9E9	Glucose-6-phosphate 1-dehydrogenase OS=Canis lupus familiaris OX=9615 GN=G6PD PE=3 SV=2	C_familiaris	3	4	2
High	F1PKL6	Ig-like domain-containing protein OS=Canis lupus familiaris OX=9615 PE=4 SV=3	C_familiaris	2	3	2
High	J9NWA8	Uncharacterized protein OS=Canis lupus familiaris OX=9615 GN=FABP5 PE=3 SV=2	C_familiaris	3	4	2
High	J9P920	Ubiquitin-activating enzyme E1 OS=Canis lupus familiaris OX=9615 GN=UBA1 PE=3 SV=2	C_familiaris	2	3	2
High	F6V440	Serglycin (Fragment) OS=Canis lupus familiaris OX=9615 GN=SRGN PE=4 SV=2	C_familiaris	2	4	2
High	E2RPB8	C-type lectin domain family 3 member B OS=Canis lupus familiaris OX=9615 GN=CLEC3B PE=4 SV=3	C_familiaris	2	3	2
High	Q2A652	G-protein coupled receptor OS=Canis lupus familiaris OX=9615 GN=PTGDR2 PE=2 SV=1	C_familiaris	2	3	2
High	F1PUB3	Heart development protein with EGF like domains 1 OS=Canis lupus familiaris OX=9615 GN=HEG1 PE=4 SV=3	C_familiaris	2	4	2
High	J9P346	SCY domain-containing protein OS=Canis lupus familiaris OX=9615 GN=PPBP PE=3 SV=1	C_familiaris	2	5	2
High	F1Q1H3	Programmed cell death 6 OS=Canis lupus familiaris OX=9615 GN=PDCD6 PE=4 SV=3	C_familiaris	2	3	2
High	E2QW61	Lipopolysaccharide-binding protein OS=Canis lupus familiaris OX=9615 GN=LBP PE=3 SV=3	C_familiaris	2	3	2
High	H9GW87	Transaldolase OS=Canis lupus familiaris OX=9615 GN=LOC475937 PE=3 SV=1	C_familiaris	2	3	2
High	F1PQ52	Myeloperoxidase OS=Canis lupus familiaris OX=9615 GN=MPO PE=4 SV=3	C_familiaris	2	4	2
High	E2RRA1	Protein kinase cAMP-dependent type II regulatory subunit beta OS=Canis lupus familiaris OX=9615 GN=PRKAR2B PE=3 SV=1	C_familiaris	2	3	2
High	E2R7S1	Calcium-transporting ATPase OS=Canis lupus familiaris OX=9615 GN=ATP2B1 PE=3 SV=3	C_familiaris	2	3	2
High	F1PXZ9	KRAS proto-oncogene, GTPase OS=Canis lupus familiaris OX=9615 GN=KRAS PE=4 SV=2	C_familiaris	2	2	2
High	J9NYK7	Uncharacterized protein OS=Canis lupus familiaris OX=9615 GN=MYADM PE=4 SV=1	C_familiaris	3	4	2
High	A0A5F4CXH2	Bactericidal permeability-increasing protein OS=Canis lupus familiaris OX=9615 GN=BPI PE=3 SV=1	C_familiaris	2	2	2
High	F1PL20	Serine incorporator 1 OS=Canis lupus familiaris OX=9615 GN=SERINC1 PE=3 SV=2	C_familiaris	2	2	2
High	F1PVR0	Matrix metallopeptidase 8 OS=Canis lupus familiaris OX=9615 GN=MMP8 PE=3 SV=2	C_familiaris	2	4	2
High	A0A5S6CBX9	F-actin-capping protein subunit alpha-2 OS=Canis lupus familiaris OX=9615 GN=CAPZA2 PE=3 SV=1	C_familiaris	3	3	2
High	A0A5F4CXZ9	Uncharacterized protein OS=Canis lupus familiaris OX=9615 GN=MYL6 PE=4 SV=1	C_familiaris	2	3	2
High	A0A5F4BT91	Beta-glucuronidase OS=Canis lupus familiaris OX=9615 GN=GUSB PE=3 SV=1	C_familiaris	2	2	2
High	A0A5F4C1K4	2',3'-cyclic-nucleotide 3'-phosphodiesterase OS=Canis lupus familiaris OX=9615 GN=CNP PE=3 SV=1	C_familiaris	2	3	2
High	F1P624	Cullin associated and neddylation dissociated 1 OS=Canis lupus familiaris OX=9615 GN=CAND1 PE=3 SV=2	C_familiaris	2	2	2
High	A0A5F4CQZ7	Peroxiredoxin-like 2 activated in M-CSF stimulated monocytes OS=Canis lupus familiaris OX=9615 GN=PRXL2A PE=3 SV=1	C_familiaris	2	3	2
High	A0A5F4CGF8	Abl interactor 2 OS=Canis lupus familiaris OX=9615 GN=ABI2 PE=3 SV=1	C_familiaris	2	2	2
High	J9NWJ5	Thioredoxin OS=Canis lupus familiaris OX=9615 PE=3 SV=2	C_familiaris	2	5	2
High	E2RE13	ADP ribosylation factor like GTPase 8B OS=Canis lupus familiaris OX=9615 GN=ARL8B PE=3 SV=1	C_familiaris	2	2	2
High	A0A5F4DCI7	TR_THY domain-containing protein OS=Canis lupus familiaris OX=9615 PE=4 SV=1	C_familiaris	2	3	2
High	P63091	Guanine nucleotide-binding protein G(s) subunit alpha OS=Canis lupus familiaris OX=9615 GN=GNAS PE=2 SV=1	C_familiaris	3	7	2
High	A0A5F4BRV8	Vimentin OS=Canis lupus familiaris OX=9615 GN=VIM PE=3 SV=1	C_familiaris	2	3	2
High	A0A5F4CII5	Chaperonin containing TCP1 subunit 6A OS=Canis lupus familiaris OX=9615 GN=CCT6A PE=3 SV=1	C_familiaris	2	4	2
High	P52784	ATP-dependent 6-phosphofructokinase, muscle type OS=Canis lupus familiaris OX=9615 GN=PFKM PE=2 SV=2	C_familiaris	2	2	2
High	A0A5F4DDF5	Mannose-6-phosphate receptor, cation dependent OS=Canis lupus familiaris OX=9615 GN=M6PR PE=4 SV=1	C_familiaris	2	2	2
High	F1PHN8	Serpin family A member 4 OS=Canis lupus familiaris OX=9615 GN=SERPINA4 PE=3 SV=3	C_familiaris	2	3	2
High	A0A5F4DI79	Myosin IC OS=Canis lupus familiaris OX=9615 GN=MYO1C PE=3 SV=1	C_familiaris	2	3	2
High	E2RNL8	Apolipoprotein D OS=Canis lupus familiaris OX=9615 GN=APOD PE=3 SV=3	C_familiaris	2	4	2
High	F1PQ91	Insulin-like growth factor-binding protein 3 OS=Canis lupus familiaris OX=9615 GN=IGFBP3 PE=4 SV=2	C_familiaris	2	4	2
High	F1P9P5	Ubiquitin carboxyl-terminal hydrolase OS=Canis lupus familiaris OX=9615 GN=USP5 PE=3 SV=3	C_familiaris	2	3	2
High	E2RGP6	Tumor susceptibility 101 OS=Canis lupus familiaris OX=9615 GN=TSG101 PE=3 SV=2	C_familiaris	2	2	2
High	E2RQ34	Megakaryocyte and platelet inhibitory receptor G6b OS=Canis lupus familiaris OX=9615 GN=MPIG6B PE=4 SV=2	C_familiaris	2	4	2
High	F1PIF2	Cathepsin X OS=Canis lupus familiaris OX=9615 GN=CTSZ PE=3 SV=3	C_familiaris	2	3	2
High	A0A5F4BPU2	Lymphocyte antigen 9 OS=Canis lupus familiaris OX=9615 GN=LY9 PE=4 SV=1	C_familiaris	2	4	2
High	A0A5F4CXX0	Reticulon OS=Canis lupus familiaris OX=9615 GN=RTN3 PE=4 SV=1	C_familiaris	2	3	2
High	E2RM61	Proteasome 26S subunit, ATPase 5 OS=Canis lupus familiaris OX=9615 GN=PSMC5 PE=3 SV=3	C_familiaris	2	3	2
High	J9PB28	Fibrinogen like 2 OS=Canis lupus familiaris OX=9615 GN=FGL2 PE=4 SV=1	C_familiaris	2	3	2
High	A0A5F4BP62	Protein argonaute-2 OS=Canis lupus familiaris OX=9615 GN=AGO2 PE=3 SV=1	C_familiaris	2	4	2
High	E2R8A7	Collectin subfamily member 11 OS=Canis lupus familiaris OX=9615 GN=COLEC11 PE=4 SV=3	C_familiaris	2	3	2
High	J9NTA1	Methyltransferase like 7A OS=Canis lupus familiaris OX=9615 GN=METTL7A PE=4 SV=2	C_familiaris	2	3	2
High	F1PPJ1	Phosphatidylinositol-5-phosphate 4-kinase type 2 alpha OS=Canis lupus familiaris OX=9615 GN=PIP4K2A PE=4 SV=2	C_familiaris	2	2	2
High	A0A5F4CDV8	Phospholipid-transporting ATPase OS=Canis lupus familiaris OX=9615 GN=ATP8A1 PE=3 SV=1	C_familiaris	2	2	2
High	A0A5F4C0G8	26S proteasome non-ATPase regulatory subunit 5 OS=Canis lupus familiaris OX=9615 GN=PSMD5 PE=4 SV=1	C_familiaris	2	2	2
High	A0A5F4CNF0	Ammonium_transp domain-containing protein OS=Canis lupus familiaris OX=9615 GN=RHCE PE=3 SV=1	C_familiaris	3	8	2
High	E2RM35	Pyrroline-5-carboxylate reductase OS=Canis lupus familiaris OX=9615 GN=PYCR3 PE=3 SV=2	C_familiaris	2	3	2
High	A0A5F4DDK9	Purine nucleoside phosphorylase OS=Canis lupus familiaris OX=9615 GN=PNP PE=3 SV=1	C_familiaris	2	2	2
High	E2QUL2	Vesicle associated membrane protein 8 OS=Canis lupus familiaris OX=9615 GN=VAMP8 PE=4 SV=3	C_familiaris	2	2	2
High	E2QSZ5	Coronin OS=Canis lupus familiaris OX=9615 GN=CORO1A PE=3 SV=1	C_familiaris	2	4	2
High	A0A5F4CYP6	C-type lectin domain family 1 member B OS=Canis lupus familiaris OX=9615 GN=CLEC1B PE=4 SV=1	C_familiaris	2	3	2
High	E2RLD5	Membrane palmitoylated protein 2 OS=Canis lupus familiaris OX=9615 GN=MPP2 PE=3 SV=3	C_familiaris	2	2	2
High	A0A5F4D6P2	Vesicle associated membrane protein 7 OS=Canis lupus familiaris OX=9615 GN=VAMP7 PE=3 SV=1	C_familiaris	2	3	2
High	A0A5F4CIF1	CCT-beta OS=Canis lupus familiaris OX=9615 PE=3 SV=1	C_familiaris	2	2	2
High	J9PAI4	Chaperonin containing TCP1 subunit 5 OS=Canis lupus familiaris OX=9615 GN=CCT5 PE=4 SV=2	C_familiaris	2	2	2
High	J9P6K8	tRNA(His) guanylyltransferase OS=Canis lupus familiaris OX=9615 GN=THG1L PE=3 SV=1	C_familiaris	2	3	2
High	A0A5F4BQ87	WW domain binding protein 2 OS=Canis lupus familiaris OX=9615 GN=WBP2 PE=4 SV=1	C_familiaris	3	3	2
High	F1PI70	Transforming growth factor beta OS=Canis lupus familiaris OX=9615 GN=TGFB1 PE=3 SV=2	C_familiaris	2	2	2
High	E2R629	Atypical chemokine receptor 1 OS=Canis lupus familiaris OX=9615 GN=ACKR1 PE=3 SV=1	C_familiaris	2	2	2
High	F1PQ40	Proteasome 26S subunit, ATPase 1 OS=Canis lupus familiaris OX=9615 GN=PSMC1 PE=3 SV=2	C_familiaris	2	2	2
High	A0A5F4DHR4	Ig-like domain-containing protein OS=Canis lupus familiaris OX=9615 PE=4 SV=1	C_familiaris	2	6	2
High	F1PNH6	Selenium binding protein 1 OS=Canis lupus familiaris OX=9615 GN=SELENBP1 PE=3 SV=3	C_familiaris	2	2	2
High	P56595	Apolipoprotein C-I OS=Canis lupus familiaris OX=9615 GN=APOC1 PE=1 SV=1	C_familiaris	2	6	2
High	A0A5F4DGX0	Uncharacterized protein OS=Canis lupus familiaris OX=9615 PE=4 SV=1	C_familiaris	2	2	2
High	A0A5F4D8P8	Isocitrate dehydrogenase [NADP] OS=Canis lupus familiaris OX=9615 GN=IDH2 PE=3 SV=1	C_familiaris	2	3	2
High	E2R7P9	P2X purinoceptor OS=Canis lupus familiaris OX=9615 GN=P2RX1 PE=3 SV=1	C_familiaris	2	5	2
High	F1PDJ7	Ig-like domain-containing protein OS=Canis lupus familiaris OX=9615 GN=AZGP1 PE=3 SV=2	C_familiaris	2	3	2
High	F1PKU7	Protein kinase C beta type OS=Canis lupus familiaris OX=9615 GN=PRKCB PE=3 SV=3	C_familiaris	2	3	2
High	E2RGK2	Trinucleotide repeat containing adaptor 6B OS=Canis lupus familiaris OX=9615 GN=TNRC6B PE=3 SV=2	C_familiaris	2	3	2
High	A0A5F4D2Z7	Peptidyl-prolyl cis-trans isomerase OS=Canis lupus familiaris OX=9615 GN=CSNK1G1 PE=3 SV=1	C_familiaris	2	2	2
High	F1Q331	T-complex protein 1 subunit delta OS=Canis lupus familiaris OX=9615 GN=CCT4 PE=3 SV=2	C_familiaris	2	2	2
High	F1PG69	Collagen type III alpha 1 chain OS=Canis lupus familiaris OX=9615 GN=COL3A1 PE=4 SV=3	C_familiaris	2	2	2
High	E2RFY1	Transmembrane channel-like protein OS=Canis lupus familiaris OX=9615 GN=TMC8 PE=3 SV=2	C_familiaris	2	2	2
High	F1PKI4	Chloride intracellular channel protein OS=Canis lupus familiaris OX=9615 GN=CLIC1 PE=3 SV=2	C_familiaris	2	3	2
High	A0A5F4BQT8	Integrin subunit alpha V OS=Canis lupus familiaris OX=9615 GN=ITGAV PE=3 SV=1	C_familiaris	2	5	2
High	J9NVM8	Solute carrier family 16 member 3 OS=Canis lupus familiaris OX=9615 GN=SLC16A3 PE=3 SV=2	C_familiaris	2	3	2
High	A0A5F4CL11	Ankyrin 1 OS=Canis lupus familiaris OX=9615 GN=ANK1 PE=4 SV=1	C_familiaris	117	384	1
High	A0A5F4CX43	Ankyrin 1 OS=Canis lupus familiaris OX=9615 GN=ANK1 PE=4 SV=1	C_familiaris	117	381	1
High	P49822	Albumin OS=Canis lupus familiaris OX=9615 GN=ALB PE=1 SV=3	C_familiaris	69	1160	1
High	E2RCC8	Uncharacterized protein OS=Canis lupus familiaris OX=9615 PE=4 SV=3	C_familiaris	45	489	1
High	A0A5F4CIZ1	Uncharacterized protein OS=Canis lupus familiaris OX=9615 PE=4 SV=1	C_familiaris	42	471	1
High	Q6Q7P4	Protein 4.1 OS=Canis lupus familiaris OX=9615 GN=EPB41 PE=2 SV=1	C_familiaris	27	97	1
High	H9GWR8	Uncharacterized protein OS=Canis lupus familiaris OX=9615 PE=4 SV=2	C_familiaris	10	406	1
High	J9NSQ1	Ig-like domain-containing protein OS=Canis lupus familiaris OX=9615 PE=4 SV=2	C_familiaris	9	388	1
High	A0A5F4C2N3	Kininogen 1 OS=Canis lupus familiaris OX=9615 GN=KNG1 PE=4 SV=1	C_familiaris	19	70	1
High	A0A5F4DAK7	Uncharacterized protein OS=Canis lupus familiaris OX=9615 GN=LOC609402 PE=3 SV=1	C_familiaris	16	321	1
High	L7N0F1	Ig-like domain-containing protein OS=Canis lupus familiaris OX=9615 GN=LOC100687054 PE=4 SV=1	C_familiaris	7	320	1
High	A0A5F4CE12	Ig-like domain-containing protein OS=Canis lupus familiaris OX=9615 PE=4 SV=1	C_familiaris	9	68	1
High	J9NXL3	Uncharacterized protein OS=Canis lupus familiaris OX=9615 GN=LOC100855540 PE=3 SV=2	C_familiaris	10	258	1
High	F1PRR4	Vasodilator-stimulated phosphoprotein OS=Canis lupus familiaris OX=9615 GN=VASP PE=3 SV=1	C_familiaris	16	41	1
High	J9P6L3	Ig-like domain-containing protein OS=Canis lupus familiaris OX=9615 PE=4 SV=2	C_familiaris	13	141	1
High	J9P7A6	Fructose-bisphosphate aldolase OS=Canis lupus familiaris OX=9615 GN=ALDOA PE=3 SV=2	C_familiaris	13	42	1
High	P50551	Vasodilator-stimulated phosphoprotein OS=Canis lupus familiaris OX=9615 GN=VASP PE=1 SV=3	C_familiaris	16	41	1
High	A0A5F4D8U5	Actin beta like 2 OS=Canis lupus familiaris OX=9615 GN=ACTBL2 PE=3 SV=1	C_familiaris	16	89	1
High	A0A5F4CKL2	Ig-like domain-containing protein OS=Canis lupus familiaris OX=9615 PE=4 SV=1	C_familiaris	10	90	1
High	A0A5F4DI88	Peroxiredoxin 4 OS=Canis lupus familiaris OX=9615 GN=PRDX4 PE=4 SV=1	C_familiaris	10	37	1
High	F1PQ99	Mannan binding lectin serine peptidase 1 OS=Canis lupus familiaris OX=9615 GN=MASP1 PE=4 SV=2	C_familiaris	11	28	1
High	A0A5F4BWC4	Ig-like domain-containing protein OS=Canis lupus familiaris OX=9615 PE=4 SV=1	C_familiaris	17	125	1
High	A0A5F4C2R6	Ig-like domain-containing protein OS=Canis lupus familiaris OX=9615 PE=4 SV=1	C_familiaris	10	92	1
High	J9PAL2	Ig-like domain-containing protein OS=Canis lupus familiaris OX=9615 PE=4 SV=2	C_familiaris	10	76	1
High	J9NYY8	Ig-like domain-containing protein OS=Canis lupus familiaris OX=9615 PE=4 SV=2	C_familiaris	18	129	1
High	A0A5F4CLB9	Ig-like domain-containing protein OS=Canis lupus familiaris OX=9615 PE=4 SV=1	C_familiaris	5	103	1
High	J9P1M7	Ig-like domain-containing protein OS=Canis lupus familiaris OX=9615 PE=4 SV=2	C_familiaris	7	57	1
High	A0A5F4C5A8	Ig-like domain-containing protein OS=Canis lupus familiaris OX=9615 PE=4 SV=1	C_familiaris	16	91	1
High	A0A5F4C493	Ig-like domain-containing protein OS=Canis lupus familiaris OX=9615 PE=4 SV=1	C_familiaris	6	48	1
High	J9NZT2	Ig-like domain-containing protein OS=Canis lupus familiaris OX=9615 PE=4 SV=2	C_familiaris	14	109	1
High	E2R2M7	RAP1A, member of RAS oncogene family OS=Canis lupus familiaris OX=9615 GN=RAP1A PE=3 SV=1	C_familiaris	6	19	1
High	A0A5F4BWF5	Tubulin beta chain OS=Canis lupus familiaris OX=9615 GN=TUBB4B PE=3 SV=1	C_familiaris	7	15	1
High	A0A5F4CFG8	WD repeat, SAM and U-box domain-containing protein 1 OS=Canis lupus familiaris OX=9615 GN=WDSUB1 PE=4 SV=1	C_familiaris	5	14	1
High	A0A5F4D5I3	Ig-like domain-containing protein OS=Canis lupus familiaris OX=9615 PE=4 SV=1	C_familiaris	5	34	1
High	A0A5F4C4S7	Ig-like domain-containing protein OS=Canis lupus familiaris OX=9615 PE=4 SV=1	C_familiaris	14	51	1
High	J9NTU0	Gp_dh_N domain-containing protein OS=Canis lupus familiaris OX=9615 PE=3 SV=1	C_familiaris	8	22	1
High	F1PQP5	Ig-like domain-containing protein OS=Canis lupus familiaris OX=9615 PE=4 SV=3	C_familiaris	4	12	1
High	P62822	Ras-related protein Rab-1A OS=Canis lupus familiaris OX=9615 GN=RAB1A PE=1 SV=3	C_familiaris	7	16	1
High	E2QSF4	Tubulin beta chain OS=Canis lupus familiaris OX=9615 GN=TUBB PE=3 SV=1	C_familiaris	7	14	1
High	E2QZT7	14_3_3 domain-containing protein OS=Canis lupus familiaris OX=9615 PE=3 SV=2	C_familiaris	3	9	1
High	F1PL63	Fructose-bisphosphate aldolase OS=Canis lupus familiaris OX=9615 GN=ALDOC PE=3 SV=1	C_familiaris	3	12	1
High	E2RBC3	Tubulin alpha chain OS=Canis lupus familiaris OX=9615 GN=TUBA4A PE=3 SV=2	C_familiaris	8	15	1
High	F1PCH3	2-phospho-D-glycerate hydro-lyase OS=Canis lupus familiaris OX=9615 GN=ENO1 PE=4 SV=3	C_familiaris	3	7	1
High	E2RF52	Proteasome subunit alpha type OS=Canis lupus familiaris OX=9615 GN=PSMA8 PE=3 SV=2	C_familiaris	4	12	1
High	A0A5F4DBN7	Ig-like domain-containing protein OS=Canis lupus familiaris OX=9615 PE=4 SV=1	C_familiaris	10	91	1
High	A0A5F4C4W3	2-phospho-D-glycerate hydro-lyase OS=Canis lupus familiaris OX=9615 PE=3 SV=1	C_familiaris	3	6	1
High	A0A5F4DCG3	Ig-like domain-containing protein OS=Canis lupus familiaris OX=9615 PE=4 SV=1	C_familiaris	8	49	1
High	A0A5F4DCX2	Ig-like domain-containing protein OS=Canis lupus familiaris OX=9615 PE=4 SV=1	C_familiaris	4	42	1
High	J9P6S8	Histone H2B OS=Canis lupus familiaris OX=9615 GN=H2BC12 PE=3 SV=1	C_familiaris	7	9	1
High	J9P849	Proteasome subunit alpha 3 OS=Canis lupus familiaris OX=9615 GN=PSMA3 PE=3 SV=2	C_familiaris	6	18	1
High	F1PMM7	Cytoplasmic FMR1-interacting protein OS=Canis lupus familiaris OX=9615 GN=CYFIP2 PE=3 SV=3	C_familiaris	6	9	1
High	A0A5F4DGR2	IGv domain-containing protein OS=Canis lupus familiaris OX=9615 PE=4 SV=1	C_familiaris	2	6	1
High	J9P3L5	Ig-like domain-containing protein OS=Canis lupus familiaris OX=9615 PE=4 SV=2	C_familiaris	4	10	1
High	J9NYN4	Uncharacterized protein OS=Canis lupus familiaris OX=9615 GN=TGOLN2 PE=4 SV=1	C_familiaris	1	3	1
High	A0A5F4D172	Ig-like domain-containing protein OS=Canis lupus familiaris OX=9615 PE=4 SV=1	C_familiaris	3	21	1
High	A0A5F4DLE0	Ig-like domain-containing protein OS=Canis lupus familiaris OX=9615 PE=4 SV=1	C_familiaris	2	9	1
High	A0A5F4D071	Ig-like domain-containing protein OS=Canis lupus familiaris OX=9615 PE=4 SV=1	C_familiaris	2	40	1
High	A0A5F4CPW0	Tyrosine 3-monooxygenase/tryptophan 5-monooxygenase activation protein epsilon OS=Canis lupus familiaris OX=9615 GN=YWHAE PE=3 SV=1	C_familiaris	4	9	1
High	A0A5F4D0K4	Bridging integrator 2 OS=Canis lupus familiaris OX=9615 GN=BIN2 PE=4 SV=1	C_familiaris	5	9	1
High	A0A5F4C451	Ig-like domain-containing protein OS=Canis lupus familiaris OX=9615 PE=4 SV=1	C_familiaris	5	13	1
High	A0A5F4BR24	Glutamate dehydrogenase (NAD(P)(+)) OS=Canis lupus familiaris OX=9615 PE=3 SV=1	C_familiaris	3	4	1
High	A0A5F4CI17	Ig-like domain-containing protein OS=Canis lupus familiaris OX=9615 PE=4 SV=1	C_familiaris	4	6	1
High	E2QX53	Glucosamine-6-phosphate isomerase OS=Canis lupus familiaris OX=9615 GN=GNPDA1 PE=3 SV=1	C_familiaris	3	7	1
High	F2Z4P9	Ras-related protein Rab-10 OS=Canis lupus familiaris OX=9615 GN=RAB10 PE=4 SV=1	C_familiaris	3	9	1
High	Q8WNN6	Superoxide dismutase [Cu-Zn] OS=Canis lupus familiaris OX=9615 GN=SOD1 PE=2 SV=1	C_familiaris	2	4	1
High	A0A5F4CAX2	Uncharacterized protein OS=Canis lupus familiaris OX=9615 PE=4 SV=1	C_familiaris	2	4	1
High	A0A5F4CH95	Nucleoside diphosphate kinase OS=Canis lupus familiaris OX=9615 GN=NME2 PE=3 SV=1	C_familiaris	2	5	1
High	A0A5F4C3J1	Ig-like domain-containing protein OS=Canis lupus familiaris OX=9615 PE=4 SV=1	C_familiaris	5	13	1
High	J9P0D4	Ig-like domain-containing protein OS=Canis lupus familiaris OX=9615 PE=4 SV=2	C_familiaris	2	15	1
High	A0A5F4CE93	IGv domain-containing protein OS=Canis lupus familiaris OX=9615 PE=4 SV=1	C_familiaris	2	10	1
High	F2Z4P1	Tubulin beta chain OS=Canis lupus familiaris OX=9615 GN=TCF25 PE=3 SV=1	C_familiaris	4	10	1
High	P01874	Ig mu chain C region OS=Canis lupus familiaris OX=9615 PE=1 SV=1	C_familiaris	2	29	1
High	F1PB66	Tetraspanin OS=Canis lupus familiaris OX=9615 GN=CD81 PE=3 SV=2	C_familiaris	3	4	1
High	A0A5F4BUM4	Ig-like domain-containing protein OS=Canis lupus familiaris OX=9615 PE=4 SV=1	C_familiaris	1	1	1
High	A0A5F4D946	Ig-like domain-containing protein OS=Canis lupus familiaris OX=9615 PE=4 SV=1	C_familiaris	3	15	1
High	A0A5F4CLU1	Superoxide dismutase [Cu-Zn] OS=Canis lupus familiaris OX=9615 GN=SOD1 PE=3 SV=1	C_familiaris	2	5	1
High	F1PZH8	Bridging integrator 2 OS=Canis lupus familiaris OX=9615 GN=BIN2 PE=4 SV=3	C_familiaris	5	8	1
High	F1PPL6	Ras-related protein Rap-2 OS=Canis lupus familiaris OX=9615 GN=RAP2C PE=3 SV=2	C_familiaris	2	2	1
High	E2RKG6	Dermokine OS=Canis lupus familiaris OX=9615 GN=DMKN PE=4 SV=3	C_familiaris	2	2	1
High	F1P719	EH domain containing 4 OS=Canis lupus familiaris OX=9615 GN=EHD4 PE=4 SV=2	C_familiaris	3	6	1
High	A0A5F4CTX4	Transportin 1 OS=Canis lupus familiaris OX=9615 GN=TNPO1 PE=4 SV=1	C_familiaris	2	3	1
High	A0A5F4C634	Sarcoplasmic/endoplasmic reticulum calcium ATPase 2 OS=Canis lupus familiaris OX=9615 GN=ATP2A2 PE=4 SV=1	C_familiaris	2	3	1
High	A0A5F4D3Y3	IGv domain-containing protein OS=Canis lupus familiaris OX=9615 PE=4 SV=1	C_familiaris	3	10	1
High	F1Q4J0	Glucosidase II alpha subunit OS=Canis lupus familiaris OX=9615 GN=GANAB PE=3 SV=2	C_familiaris	1	1	1
High	A0A5F4CYJ6	Aldehyde dehydrogenase family 16 member A1 OS=Canis lupus familiaris OX=9615 GN=ALDH16A1 PE=3 SV=1	C_familiaris	1	1	1
High	J9P820	Formin homology 2 domain containing 1 OS=Canis lupus familiaris OX=9615 GN=FHOD1 PE=4 SV=1	C_familiaris	1	2	1
High	A0A5F4C9M3	Uncharacterized protein OS=Canis lupus familiaris OX=9615 PE=4 SV=1	C_familiaris	1	1	1
High	J9P7R7	Shootin-1 OS=Canis lupus familiaris OX=9615 GN=SHTN1 PE=3 SV=1	C_familiaris	1	2	1
High	E2R7A0	Hydroxyacylglutathione hydrolase OS=Canis lupus familiaris OX=9615 GN=HAGH PE=3 SV=2	C_familiaris	1	2	1
High	F1Q185	Ig-like domain-containing protein OS=Canis lupus familiaris OX=9615 PE=4 SV=3	C_familiaris	1	4	1
High	A0A5F4DBR8	TNF receptor associated protein 1 OS=Canis lupus familiaris OX=9615 GN=TRAP1 PE=3 SV=1	C_familiaris	2	3	1
High	E2RB37	Protein disulfide isomerase family A member 6 OS=Canis lupus familiaris OX=9615 GN=PDIA6 PE=3 SV=1	C_familiaris	1	2	1
High	E2R5F0	Intercellular adhesion molecule 2 OS=Canis lupus familiaris OX=9615 GN=ICAM2 PE=4 SV=2	C_familiaris	1	2	1
High	A0A5F4DA40	Eukaryotic translation initiation factor 5A OS=Canis lupus familiaris OX=9615 GN=EIF5A PE=3 SV=1	C_familiaris	1	1	1
High	J9JHE0	cGMP-dependent protein kinase OS=Canis lupus familiaris OX=9615 GN=PRKG1 PE=3 SV=2	C_familiaris	1	2	1
High	A0A5F4DAV6	ATP binding cassette subfamily C member 4 OS=Canis lupus familiaris OX=9615 GN=ABCC4 PE=4 SV=1	C_familiaris	1	1	1
High	E2R2F7	Sex hormone binding globulin OS=Canis lupus familiaris OX=9615 GN=SHBG PE=4 SV=1	C_familiaris	1	4	1
High	A0A5F4BSJ2	J domain-containing protein OS=Canis lupus familiaris OX=9615 PE=4 SV=1	C_familiaris	1	1	1
High	E2RBL2	Secretory carrier-associated membrane protein OS=Canis lupus familiaris OX=9615 GN=SCAMP2 PE=3 SV=3	C_familiaris	1	4	1
High	J9NYJ8	RAB6A, member RAS oncogene family OS=Canis lupus familiaris OX=9615 GN=RAB6A PE=4 SV=1	C_familiaris	2	5	1
High	F1PZW8	G protein subunit alpha 13 OS=Canis lupus familiaris OX=9615 GN=GNA13 PE=3 SV=3	C_familiaris	1	3	1
High	A0A5F4CVC8	Major facilitator superfamily domain containing 2B OS=Canis lupus familiaris OX=9615 GN=MFSD2B PE=4 SV=1	C_familiaris	1	2	1
High	A0A5F4CA83	LRR binding FLII interacting protein 2 OS=Canis lupus familiaris OX=9615 GN=LRRFIP2 PE=3 SV=1	C_familiaris	1	1	1
High	E2R469	Formyl peptide receptor 2 OS=Canis lupus familiaris OX=9615 GN=FPR2 PE=3 SV=2	C_familiaris	1	2	1
High	A0A5F4D8G2	NSF attachment protein alpha OS=Canis lupus familiaris OX=9615 GN=NAPA PE=3 SV=1	C_familiaris	1	1	1
High	E2RJ26	Proteasome 26S subunit, non-ATPase 11 OS=Canis lupus familiaris OX=9615 GN=PSMD11 PE=3 SV=2	C_familiaris	1	2	1
High	A0A5F4CEF0	Cytochrome b-245 beta chain OS=Canis lupus familiaris OX=9615 GN=CYBB PE=4 SV=1	C_familiaris	1	1	1
High	E2R9D5	Uncharacterized protein OS=Canis lupus familiaris OX=9615 PE=3 SV=2	C_familiaris	1	3	1
High	A0A5F4CEZ8	Transportin 2 OS=Canis lupus familiaris OX=9615 GN=TNPO2 PE=4 SV=1	C_familiaris	2	2	1
High	P02727	Glycophorin-A OS=Canis lupus familiaris OX=9615 GN=GYPA PE=1 SV=3	C_familiaris	1	2	1
High	E2R2A1	Golgin A7 OS=Canis lupus familiaris OX=9615 GN=GOLGA7 PE=4 SV=2	C_familiaris	1	2	1
High	F1Q0K5	ATP-dependent dihydroxyacetone kinase OS=Canis lupus familiaris OX=9615 GN=TKFC PE=4 SV=2	C_familiaris	1	2	1
High	A0A5F4DBN6	Glutathione-disulfide reductase OS=Canis lupus familiaris OX=9615 GN=GSR PE=3 SV=1	C_familiaris	1	3	1
High	F1PBK7	AAA domain-containing protein OS=Canis lupus familiaris OX=9615 GN=PSMC3 PE=3 SV=2	C_familiaris	1	2	1
High	J9NY67	RNA helicase OS=Canis lupus familiaris OX=9615 PE=3 SV=1	C_familiaris	1	2	1
High	E2RB90	Heterogeneous nuclear ribonucleoprotein F OS=Canis lupus familiaris OX=9615 GN=HNRNPF PE=4 SV=1	C_familiaris	1	2	1
High	E2QXY8	HVEM OS=Canis lupus familiaris OX=9615 GN=TNFRSF14 PE=2 SV=2	C_familiaris	1	2	1
High	P12278	Apolipoprotein C-II OS=Canis lupus familiaris OX=9615 GN=APOC2 PE=1 SV=1	C_familiaris	1	1	1
High	A0A5F4CGR9	Ig-like domain-containing protein OS=Canis lupus familiaris OX=9615 PE=4 SV=1	C_familiaris	1	2	1
High	F1Q4I3	MARVEL domain-containing protein OS=Canis lupus familiaris OX=9615 PE=4 SV=3	C_familiaris	1	2	1
High	J9NWC3	MYC target 1 OS=Canis lupus familiaris OX=9615 GN=MYCT1 PE=4 SV=2	C_familiaris	1	2	1
High	F1Q1S9	TBC1 domain family member 24 OS=Canis lupus familiaris OX=9615 GN=TBC1D24 PE=4 SV=2	C_familiaris	1	1	1
High	C0LQL0	Protein S100 OS=Canis lupus familiaris OX=9615 GN=S100A8 PE=2 SV=1	C_familiaris	1	2	1
High	E2RNY7	ATP synthase subunit gamma OS=Canis lupus familiaris OX=9615 GN=ATP5F1C PE=2 SV=3	C_familiaris	1	1	1
High	E2RMC1	ST13 Hsp70 interacting protein OS=Canis lupus familiaris OX=9615 GN=ST13 PE=3 SV=3	C_familiaris	1	2	1
High	A0A5F4DJF0	Cystathionine gamma-lyase OS=Canis lupus familiaris OX=9615 GN=CTH PE=3 SV=1	C_familiaris	1	1	1
High	F1PIL9	Interleukin 1 receptor accessory protein OS=Canis lupus familiaris OX=9615 GN=IL1RAP PE=3 SV=3	C_familiaris	1	1	1
High	A4GT58	Cdc42 GTPase-activating protein OS=Canis lupus familiaris OX=9615 GN=ARHGAP1 PE=2 SV=1	C_familiaris	1	3	1
High	J9NZQ3	V-type proton ATPase subunit G OS=Canis lupus familiaris OX=9615 PE=3 SV=2	C_familiaris	1	1	1
High	E2RF06	Importin 5 OS=Canis lupus familiaris OX=9615 GN=IPO5 PE=4 SV=3	C_familiaris	1	1	1
High	A0A5F4CT58	Thioredoxin-disulfide reductase OS=Canis lupus familiaris OX=9615 GN=TXNRD2 PE=3 SV=1	C_familiaris	1	1	1
High	A0A5F4CNN7	Ig-like domain-containing protein OS=Canis lupus familiaris OX=9615 PE=4 SV=1	C_familiaris	2	14	1
High	F1PKV2	Coactivator-associated arginine methyltransferase 1 OS=Canis lupus familiaris OX=9615 GN=CARM1 PE=4 SV=3	C_familiaris	1	1	1
High	A0A5F4CKF4	Tetraspanin OS=Canis lupus familiaris OX=9615 GN=TSPAN2 PE=3 SV=1	C_familiaris	1	2	1
High	Q00M95	Inactive rhomboid protein 2 OS=Canis lupus familiaris OX=9615 GN=RHBDF2 PE=2 SV=1	C_familiaris	1	1	1
High	A0A5F4CE33	Triggering receptor expressed on myeloid cells 2 OS=Canis lupus familiaris OX=9615 GN=TREM2 PE=4 SV=1	C_familiaris	1	1	1
High	A0A5F4BR75	PTN_MK_C domain-containing protein OS=Canis lupus familiaris OX=9615 PE=4 SV=1	C_familiaris	1	2	1
High	A0A5F4CIR1	Nidogen 1 OS=Canis lupus familiaris OX=9615 GN=NID1 PE=4 SV=1	C_familiaris	1	1	1
High	F1P687	Alpha-mannosidase OS=Canis lupus familiaris OX=9615 GN=MAN2C1 PE=3 SV=3	C_familiaris	1	1	1
High	A0A5F4CIL5	Metalloproteinase inhibitor 3 OS=Canis lupus familiaris OX=9615 GN=TIMP3 PE=3 SV=1	C_familiaris	1	2	1
High	F1PWT3	Deoxyribonuclease OS=Canis lupus familiaris OX=9615 GN=DNASE1L1 PE=3 SV=2	C_familiaris	1	2	1
High	E2R580	VAMP associated protein A OS=Canis lupus familiaris OX=9615 GN=VAPA PE=4 SV=1	C_familiaris	1	1	1
High	F1PBA0	Uncharacterized protein OS=Canis lupus familiaris OX=9615 GN=CD58 PE=4 SV=3	C_familiaris	1	2	1
High	A0A5F4CKV5	Solute carrier family 12 member 7 OS=Canis lupus familiaris OX=9615 GN=SLC12A7 PE=3 SV=1	C_familiaris	1	1	1
High	F1PCR0	Microsomal glutathione S-transferase 3 OS=Canis lupus familiaris OX=9615 GN=MGST3 PE=4 SV=2	C_familiaris	1	1	1
High	J9P7Y9	Uncharacterized protein OS=Canis lupus familiaris OX=9615 PE=4 SV=2	C_familiaris	1	2	1
High	A0A5F4DDS5	CD86 molecule OS=Canis lupus familiaris OX=9615 GN=CD86 PE=4 SV=1	C_familiaris	1	1	1
High	A0A5F4D8D4	Aspartyl aminopeptidase OS=Canis lupus familiaris OX=9615 GN=DNPEP PE=3 SV=1	C_familiaris	1	1	1
High	F6UT80	Calcium homeostasis modulator family member 5 OS=Canis lupus familiaris OX=9615 GN=CALHM5 PE=3 SV=2	C_familiaris	1	3	1
High	A0A5F4C041	Folate_rec domain-containing protein OS=Canis lupus familiaris OX=9615 GN=FOLR2 PE=3 SV=1	C_familiaris	1	1	1
High	F1PB85	Serpin family A member 7 OS=Canis lupus familiaris OX=9615 GN=SERPINA7 PE=3 SV=2	C_familiaris	1	2	1
High	B3RFJ1	ATP-binding cassette sub-family G member 2 OS=Canis lupus familiaris OX=9615 GN=ABCG2 PE=2 SV=1	C_familiaris	1	2	1
High	Q6UR05	Multidrug resistance-associated protein 1 OS=Canis lupus familiaris OX=9615 GN=ABCC1 PE=1 SV=1	C_familiaris	1	1	1
High	E2RD70	COP9 signalosome complex subunit 3 OS=Canis lupus familiaris OX=9615 GN=COPS3 PE=3 SV=1	C_familiaris	1	1	1
High	J9NZG6	Olfactory receptor OS=Canis lupus familiaris OX=9615 GN=OR1M1B PE=3 SV=2	C_familiaris	2	7	1
High	A0A5F4C4Q1	Beta-2-microglobulin OS=Canis lupus familiaris OX=9615 GN=B2M PE=3 SV=1	C_familiaris	1	2	1
High	A0A5F4CAX8	Elongation factor 1-alpha OS=Canis lupus familiaris OX=9615 PE=3 SV=1	C_familiaris	1	3	1
High	E2R9R6	Programmed cell death 10 OS=Canis lupus familiaris OX=9615 GN=PDCD10 PE=3 SV=3	C_familiaris	1	3	1
High	F6Y6B4	SH3 domain binding glutamate rich protein like 2 OS=Canis lupus familiaris OX=9615 GN=SH3BGRL2 PE=3 SV=2	C_familiaris	1	2	1
High	F1P996	G protein pathway suppressor 1 OS=Canis lupus familiaris OX=9615 GN=GPS1 PE=3 SV=3	C_familiaris	1	1	1
High	E2QWP1	BRO1 domain- and CAAX motif-containing protein OS=Canis lupus familiaris OX=9615 GN=BROX PE=3 SV=1	C_familiaris	1	2	1
High	E2REP2	Trafficking from ER to golgi regulator OS=Canis lupus familiaris OX=9615 GN=TFG PE=4 SV=2	C_familiaris	1	1	1
High	E2QXD6	Glyoxalase domain-containing protein 4 OS=Canis lupus familiaris OX=9615 GN=GLOD4 PE=4 SV=3	C_familiaris	1	1	1
High	E2RN00	26S proteasome non-ATPase regulatory subunit 6 OS=Canis lupus familiaris OX=9615 GN=PRICKLE2 PE=3 SV=2	C_familiaris	1	1	1
High	E2QX78	Solute carrier family 43 member 3 OS=Canis lupus familiaris OX=9615 GN=SLC43A3 PE=4 SV=1	C_familiaris	1	1	1
High	A0A5F4C2C4	Protein kinase domain-containing protein OS=Canis lupus familiaris OX=9615 GN=CSNK2A1 PE=3 SV=1	C_familiaris	1	2	1
High	H9GWC7	Protein-ribulosamine 3-kinase OS=Canis lupus familiaris OX=9615 GN=FN3KRP PE=3 SV=3	C_familiaris	1	2	1
High	E2RH46	Uncharacterized protein OS=Canis lupus familiaris OX=9615 PE=4 SV=3	C_familiaris	1	1	1
High	E2REU6	IF rod domain-containing protein OS=Canis lupus familiaris OX=9615 GN=KRT18 PE=3 SV=3	C_familiaris	2	8	1
High	F1PEN8	Carboxylic ester hydrolase OS=Canis lupus familiaris OX=9615 GN=BCHE PE=3 SV=1	C_familiaris	1	1	1
High	A0A5F4D8R7	ATP binding cassette subfamily A member 12 OS=Canis lupus familiaris OX=9615 GN=ABCA12 PE=4 SV=1	C_familiaris	1	3	1
High	F1PEJ5	Tetraspanin OS=Canis lupus familiaris OX=9615 GN=TSPAN33 PE=3 SV=3	C_familiaris	1	1	1
High	A0A5F4D1I6	Betaine--homocysteine S-methyltransferase 2 OS=Canis lupus familiaris OX=9615 GN=BHMT2 PE=4 SV=1	C_familiaris	1	1	1
High	A0A5F4CVM1	ATP synthase F1 subunit epsilon OS=Canis lupus familiaris OX=9615 GN=ATP5IF1 PE=3 SV=1	C_familiaris	1	1	1
High	A0A5F4CPQ6	CCT-theta OS=Canis lupus familiaris OX=9615 GN=CCT8 PE=3 SV=1	C_familiaris	1	1	1
High	J9NRP8	Twinfilin actin binding protein 1 OS=Canis lupus familiaris OX=9615 GN=TWF1 PE=3 SV=2	C_familiaris	1	1	1
High	A0A5F4CE41	Ig-like domain-containing protein OS=Canis lupus familiaris OX=9615 PE=4 SV=1	C_familiaris	1	2	1
High	A0A5F4CQR5	Hyaluronoglucosaminidase OS=Canis lupus familiaris OX=9615 GN=CEMIP2 PE=3 SV=1	C_familiaris	1	1	1
High	A0A5F4BP23	Proteasome 26S subunit, non-ATPase 12 OS=Canis lupus familiaris OX=9615 GN=PSMD12 PE=3 SV=1	C_familiaris	1	1	1
High	A0A5F4DJ40	Prohibitin OS=Canis lupus familiaris OX=9615 GN=PHB2 PE=3 SV=1	C_familiaris	1	2	1
High	A0A5F4BQK3	Lysosomal associated membrane protein 2 OS=Canis lupus familiaris OX=9615 GN=LAMP2 PE=3 SV=1	C_familiaris	1	3	1
High	F1PRW2	C5a anaphylatoxin chemotactic receptor OS=Canis lupus familiaris OX=9615 GN=C5AR1 PE=3 SV=1	C_familiaris	1	1	1
High	J9P2K0	Fibulin 2 OS=Canis lupus familiaris OX=9615 GN=FBLN2 PE=3 SV=1	C_familiaris	1	1	1
High	F6XIK8	Synaptotagmin binding cytoplasmic RNA interacting protein OS=Canis lupus familiaris OX=9615 GN=SYNCRIP PE=4 SV=1	C_familiaris	1	1	1
High	A0A5F4CLF7	Calmodulin 1 OS=Canis lupus familiaris OX=9615 GN=CALM1 PE=4 SV=1	C_familiaris	1	1	1
High	A0A5F4CSN7	Ras homolog family member F, filopodia associated OS=Canis lupus familiaris OX=9615 GN=RHOF PE=4 SV=1	C_familiaris	1	1	1
High	J9NST4	SelP_N domain-containing protein OS=Canis lupus familiaris OX=9615 GN=SELENOP PE=4 SV=2	C_familiaris	1	4	1
High	F6UY11	Proteasome activator subunit 1 OS=Canis lupus familiaris OX=9615 GN=PSME1 PE=3 SV=2	C_familiaris	1	1	1
High	F1PRL5	Solute carrier family 25 member 5 OS=Canis lupus familiaris OX=9615 GN=SLC25A5 PE=3 SV=2	C_familiaris	1	1	1
High	J9P4N4	MAC-inhibitory protein OS=Canis lupus familiaris OX=9615 GN=CD59 PE=4 SV=2	C_familiaris	1	1	1
High	A0A5F4CQ29	V-type proton ATPase subunit G OS=Canis lupus familiaris OX=9615 PE=3 SV=1	C_familiaris	1	6	1
High	E2RR68	Niban apoptosis regulator 2 OS=Canis lupus familiaris OX=9615 GN=NIBAN2 PE=3 SV=1	C_familiaris	1	1	1
High	F1PE67	AP-2 complex subunit alpha OS=Canis lupus familiaris OX=9615 GN=AP2A1 PE=3 SV=3	C_familiaris	1	1	1
High	E2R857	Bleomycin hydrolase OS=Canis lupus familiaris OX=9615 GN=BLMH PE=3 SV=1	C_familiaris	1	2	1
High	F1PZ37	MARVEL domain-containing protein OS=Canis lupus familiaris OX=9615 PE=3 SV=3	C_familiaris	1	1	1
High	A0A5F4BVJ0	Alpha-mannosidase OS=Canis lupus familiaris OX=9615 GN=MAN2B1 PE=3 SV=1	C_familiaris	1	1	1
High	J9NRF6	Extended synaptotagmin 1 OS=Canis lupus familiaris OX=9615 GN=ESYT1 PE=4 SV=2	C_familiaris	1	1	1
High	E2R9D7	DnaJ heat shock protein family (Hsp40) member B1 OS=Canis lupus familiaris OX=9615 GN=DNAJB1 PE=4 SV=1	C_familiaris	1	1	1
High	F1PR26	Prostaglandin F2 receptor inhibitor OS=Canis lupus familiaris OX=9615 GN=PTGFRN PE=4 SV=3	C_familiaris	1	1	1
High	A0A5F4CPI8	Cyclooxygenase-1 OS=Canis lupus familiaris OX=9615 GN=PTGS1 PE=3 SV=1	C_familiaris	1	1	1
High	E2QY46	Dicarbonyl and L-xylulose reductase OS=Canis lupus familiaris OX=9615 GN=DCXR PE=4 SV=2	C_familiaris	1	1	1
High	F1Q0C1	DOP1 leucine zipper like protein A OS=Canis lupus familiaris OX=9615 GN=DOP1A PE=3 SV=3	C_familiaris	1	2	1
High	J9NT43	TPR_REGION domain-containing protein OS=Canis lupus familiaris OX=9615 PE=4 SV=2	C_familiaris	1	1	1
High	A0A5F4D908	Phosphodiesterase OS=Canis lupus familiaris OX=9615 GN=PDE5A PE=3 SV=1	C_familiaris	1	1	1
High	E2RAL0	Rho GDP dissociation inhibitor beta OS=Canis lupus familiaris OX=9615 GN=ARHGDIB PE=3 SV=1	C_familiaris	1	1	1
High	J9PAQ5	Protein S100 OS=Canis lupus familiaris OX=9615 GN=S100A12 PE=3 SV=1	C_familiaris	1	2	1
High	A0A5F4D2Z2	AP complex subunit beta OS=Canis lupus familiaris OX=9615 GN=AP2B1 PE=3 SV=1	C_familiaris	1	1	1
High	A0A5F4CYS8	AA_permease_C domain-containing protein OS=Canis lupus familiaris OX=9615 PE=4 SV=1	C_familiaris	1	4	1
High	A0A5F4CI19	Tyrosine-protein phosphatase non-receptor type OS=Canis lupus familiaris OX=9615 GN=PTPN6 PE=3 SV=1	C_familiaris	1	1	1
High	J9NYN2	Cysteine and glycine rich protein 1 OS=Canis lupus familiaris OX=9615 GN=CSRP1 PE=4 SV=1	C_familiaris	1	2	1
High	E2R578	Solute carrier family 25 member 11 OS=Canis lupus familiaris OX=9615 GN=SLC25A11 PE=3 SV=2	C_familiaris	1	2	1
High	A0A5F4CPF2	CCT-alpha OS=Canis lupus familiaris OX=9615 GN=TCP1 PE=3 SV=1	C_familiaris	1	1	1
High	E2RAK7	Apolipoprotein A-II OS=Canis lupus familiaris OX=9615 GN=APOA2 PE=1 SV=2	C_familiaris	1	1	1
High	A0A5F4CGL6	G protein-coupled receptor kinase OS=Canis lupus familiaris OX=9615 GN=GRK6 PE=3 SV=1	C_familiaris	1	1	1
High	A0A5F4CTV8	Eukaryotic translation initiation factor 4C OS=Canis lupus familiaris OX=9615 GN=EIF1AX PE=3 SV=1	C_familiaris	1	2	1
High	J9NY79	Malate dehydrogenase OS=Canis lupus familiaris OX=9615 PE=3 SV=2	C_familiaris	1	1	1
High	A0A5F4DBI9	Vesicle associated membrane protein 3 OS=Canis lupus familiaris OX=9615 GN=VAMP3 PE=4 SV=1	C_familiaris	1	1	1
High	E2RFK4	CD177 molecule OS=Canis lupus familiaris OX=9615 GN=CD177 PE=4 SV=2	C_familiaris	1	1	1
High	E2RMQ5	CD200 molecule OS=Canis lupus familiaris OX=9615 GN=CD200 PE=4 SV=3	C_familiaris	1	1	1
High	J9P0X7	Coactosin like F-actin binding protein 1 OS=Canis lupus familiaris OX=9615 GN=COTL1 PE=4 SV=2	C_familiaris	1	1	1
High	F6Y5Z5	APC-binding protein EB1 OS=Canis lupus familiaris OX=9615 GN=EFCAB8 PE=3 SV=2	C_familiaris	1	3	1
High	J9NT52	Chromosome 6 C16orf71 homolog OS=Canis lupus familiaris OX=9615 GN=C6H16orf71 PE=4 SV=2	C_familiaris	1	1	1
High	E2QWL2	Calcium/calmodulin dependent protein kinase IV OS=Canis lupus familiaris OX=9615 GN=CAMK4 PE=3 SV=3	C_familiaris	1	2	1
High	F1PFB4	Fermitin family member 2 OS=Canis lupus familiaris OX=9615 GN=FERMT2 PE=4 SV=3	C_familiaris	1	2	1
High	J9NWJ0	Peptidoglycan-recognition protein OS=Canis lupus familiaris OX=9615 GN=PGLYRP1 PE=3 SV=1	C_familiaris	1	1	1
High	J9NY04	Regulator of G protein signaling 19 OS=Canis lupus familiaris OX=9615 GN=RGS19 PE=4 SV=2	C_familiaris	1	1	1
High	E2R6K5	Histone H3 OS=Canis lupus familiaris OX=9615 GN=H3-3A PE=3 SV=1	C_familiaris	1	3	1
High	L7N0E7	Uncharacterized protein OS=Canis lupus familiaris OX=9615 PE=4 SV=2	C_familiaris	1	1	1
High	F6XGX1	Neural proliferation, differentiation and control 1 OS=Canis lupus familiaris OX=9615 GN=NPDC1 PE=4 SV=2	C_familiaris	1	1	1
High	F1PQM7	Tetraspanin OS=Canis lupus familiaris OX=9615 GN=CD9 PE=3 SV=3	C_familiaris	1	9	1
High	J9P333	Uncharacterized protein OS=Canis lupus familiaris OX=9615 GN=LOC100855485 PE=4 SV=2	C_familiaris	1	2	1
High	E2RGF3	Na(+)/H(+) exchange regulatory cofactor NHE-RF OS=Canis lupus familiaris OX=9615 GN=SLC9A3R1 PE=2 SV=3	C_familiaris	1	1	1
High	E2RST8	Heparanase OS=Canis lupus familiaris OX=9615 GN=HPSE PE=3 SV=1	C_familiaris	1	1	1
High	F1Q455	PKHD1 like 1 OS=Canis lupus familiaris OX=9615 GN=PKHD1L1 PE=4 SV=3	C_familiaris	1	1	1
High	A0A5F4CIG0	KAT8 regulatory NSL complex subunit 1 OS=Canis lupus familiaris OX=9615 GN=KANSL1 PE=4 SV=1	C_familiaris	1	2	1
High	A0A5F4C306	Centrosomal protein of 162 kDa OS=Canis lupus familiaris OX=9615 GN=CEP162 PE=3 SV=1	C_familiaris	1	1	1
High	P55745	Ras-related protein Rab-21 OS=Canis lupus familiaris OX=9615 GN=RAB21 PE=3 SV=3	C_familiaris	1	2	1
High	E2RQ37	Lymphocyte antigen 6 family member G6C OS=Canis lupus familiaris OX=9615 GN=LY6G6C PE=4 SV=1	C_familiaris	1	1	1
High	E2RQ08	Dolichyl-diphosphooligosaccharide--protein glycosyltransferase subunit 1 OS=Canis lupus familiaris OX=9615 GN=RPN1 PE=1 SV=1	C_familiaris	1	1	1
High	A0A5F4DB23	Phospholipid-transporting ATPase OS=Canis lupus familiaris OX=9615 GN=ATP11C PE=3 SV=1	C_familiaris	1	1	1
High	E2RSX8	Latexin OS=Canis lupus familiaris OX=9615 GN=LXN PE=3 SV=1	C_familiaris	1	1	1
High	F1Q1C9	Arrestin domain containing 1 OS=Canis lupus familiaris OX=9615 GN=ARRDC1 PE=3 SV=2	C_familiaris	1	1	1
High	A0A5F4CG10	Dual specificity protein phosphatase OS=Canis lupus familiaris OX=9615 GN=DUSP2 PE=3 SV=1	C_familiaris	1	1	1
High	A0A5F4D4Z6	Adipsin OS=Canis lupus familiaris OX=9615 GN=ARHGAP45 PE=4 SV=1	C_familiaris	1	1	1
High	A0A5F4CGD2	Coronin OS=Canis lupus familiaris OX=9615 GN=CORO1B PE=3 SV=1	C_familiaris	1	2	1
High	A0A5F4CUF1	Sarcolemma associated protein OS=Canis lupus familiaris OX=9615 GN=SLMAP PE=4 SV=1	C_familiaris	1	1	1
High	F1Q3Z3	Solute carrier organic anion transporter family member OS=Canis lupus familiaris OX=9615 GN=SLCO6A1 PE=3 SV=2	C_familiaris	1	13	1
High	J9PAV3	Elongation factor 1-gamma OS=Canis lupus familiaris OX=9615 PE=4 SV=2	C_familiaris	1	1	1
High	A0A5F4CTH0	Dedicator of cytokinesis 11 OS=Canis lupus familiaris OX=9615 GN=DOCK11 PE=3 SV=1	C_familiaris	1	1	1
High	A0A5F4CEA8	Uncharacterized protein OS=Canis lupus familiaris OX=9615 PE=3 SV=1	C_familiaris	1	2	1
High	A0A5F4CVH7	Guanine nucleotide exchange factor H1 OS=Canis lupus familiaris OX=9615 GN=ARHGEF2 PE=4 SV=1	C_familiaris	1	1	1
High	Q5W412	Proteasome subunit beta OS=Canis lupus familiaris OX=9615 GN=PSMB9 PE=3 SV=1	C_familiaris	1	1	1
High	A0A5F4CE89	Glypican-3 OS=Canis lupus familiaris OX=9615 GN=GPC3 PE=3 SV=1	C_familiaris	1	3	1
High	A0A5F4C0Q1	Syntaxin 7 OS=Canis lupus familiaris OX=9615 GN=STX7 PE=3 SV=1	C_familiaris	1	1	1
High	Q4LAL8	Chloride channel protein OS=Canis lupus familiaris OX=9615 GN=CLCN3 PE=2 SV=1	C_familiaris	1	1	1
High	F1PZ57	Centrosomal protein 89 OS=Canis lupus familiaris OX=9615 GN=CEP89 PE=4 SV=3	C_familiaris	1	3	1
High	A0A5F4CJY3	Uncharacterized protein OS=Canis lupus familiaris OX=9615 GN=TRIM6 PE=4 SV=1	C_familiaris	1	2	1
High	A0A5F4CFS5	URI1 prefoldin like chaperone OS=Canis lupus familiaris OX=9615 GN=URI1 PE=4 SV=1	C_familiaris	1	3	1
High	A0A5F4DHZ1	Plexin A4 OS=Canis lupus familiaris OX=9615 GN=PLXNA4 PE=3 SV=1	C_familiaris	1	6	1
Medium	A0A5F4CFF9	Vascular endothelial growth factor receptor 3 OS=Canis lupus familiaris OX=9615 GN=FLT4 PE=3 SV=1	C_familiaris	1	4	1
Medium	F1PXM4	Taste receptor type 1 member 3 OS=Canis lupus familiaris OX=9615 GN=TAS1R3 PE=4 SV=3	C_familiaris	1	1	1
Medium	E2R299	Cysteine-rich and transmembrane domain-containing protein 1 OS=Canis lupus familiaris OX=9615 GN=CYSTM1 PE=3 SV=1	C_familiaris	1	1	1
Medium	E2RF44	Transcobalamin 1 OS=Canis lupus familiaris OX=9615 GN=TCN1 PE=3 SV=2	C_familiaris	1	1	1
Medium	F1Q1Q0	Coronin OS=Canis lupus familiaris OX=9615 GN=CORO1C PE=3 SV=3	C_familiaris	1	1	1
Medium	A0A5F4D1I9	Transporter OS=Canis lupus familiaris OX=9615 GN=SLC6A4 PE=3 SV=1	C_familiaris	1	1	1
Medium	A0A5F4CD40	NAD-dependent protein deacylase sirtuin-5, mitochondrial OS=Canis lupus familiaris OX=9615 GN=SIRT5 PE=3 SV=1	C_familiaris	1	2	1
Medium	F1Q406	T-complex protein 1 subunit eta OS=Canis lupus familiaris OX=9615 GN=CCT7 PE=3 SV=2	C_familiaris	1	1	1
Medium	E2RII4	EMAP like 2 OS=Canis lupus familiaris OX=9615 GN=EML2 PE=3 SV=3	C_familiaris	1	1	1
Medium	F1PJS3	[Histone H3]-trimethyl-L-lysine(4) demethylase OS=Canis lupus familiaris OX=9615 GN=KDM5B PE=3 SV=3	C_familiaris	1	1	1
Medium	F1PTH3	DNA helicase OS=Canis lupus familiaris OX=9615 GN=CHD6 PE=3 SV=3	C_familiaris	1	1	1
Medium	A0A5F4BXH9	Uncharacterized protein OS=Canis lupus familiaris OX=9615 PE=4 SV=1	C_familiaris	1	1	1
Medium	E2QY91	Dishevelled segment polarity protein 1 OS=Canis lupus familiaris OX=9615 GN=DVL1 PE=3 SV=2	C_familiaris	1	2	1
Medium	A0A5F4BP18	Rho-GAP domain-containing protein OS=Canis lupus familiaris OX=9615 GN=ARHGAP18 PE=4 SV=1	C_familiaris	1	1	1
Medium	A0A5F4CIP0	Spectrin repeat containing nuclear envelope protein 2 OS=Canis lupus familiaris OX=9615 GN=SYNE2 PE=3 SV=1	C_familiaris	1	2	1
Medium	F1Q3G4	WDFY family member 4 OS=Canis lupus familiaris OX=9615 GN=WDFY4 PE=3 SV=3	C_familiaris	1	1	1
Medium	E2QYG6	H(+)-transporting two-sector ATPase OS=Canis lupus familiaris OX=9615 GN=ATP6V1A PE=3 SV=1	C_familiaris	1	1	1
Medium	E2QUG8	ATP-dependent (S)-NAD(P)H-hydrate dehydratase OS=Canis lupus familiaris OX=9615 GN=CARKD PE=3 SV=3	C_familiaris	1	1	1
Medium	J9P3S6	Uncharacterized protein OS=Canis lupus familiaris OX=9615 PE=4 SV=1	C_familiaris	1	2	1
Medium	A0A5F4CCY3	PRP4 pre-mRNA-processing factor 4 homolog OS=Canis lupus familiaris OX=9615 GN=PRPF4B PE=3 SV=1	C_familiaris	1	1	1
Medium	E2QV04	Transmembrane protein 178A OS=Canis lupus familiaris OX=9615 GN=TMEM178A PE=3 SV=3	C_familiaris	1	1	1
Medium	F1PXV0	Uncharacterized protein OS=Canis lupus familiaris OX=9615 GN=LOC606788 PE=4 SV=2	C_familiaris	1	8	1
Medium	A0A5F4BNV2	Inositol 1,4,5-trisphosphate receptor type 3 OS=Canis lupus familiaris OX=9615 GN=ITPR3 PE=3 SV=1	C_familiaris	1	1	1
Medium	A0A5F4BT67	Alpha-centractin OS=Canis lupus familiaris OX=9615 GN=ACTR1A PE=3 SV=1	C_familiaris	1	1	1
Medium	A0A5F4C7I2	Calumenin OS=Canis lupus familiaris OX=9615 GN=FAM71F1 PE=3 SV=1	C_familiaris	1	1	1
Medium	J9P7X2	Thy-1 antigen OS=Canis lupus familiaris OX=9615 GN=THY1 PE=4 SV=1	C_familiaris	1	1	1
Medium	A0A5F4CE51	Chromodomain helicase DNA binding protein 1 like OS=Canis lupus familiaris OX=9615 GN=CHD1L PE=4 SV=1	C_familiaris	1	1	1
Medium	E2QXT6	Kinesin family member 11 OS=Canis lupus familiaris OX=9615 GN=KIF11 PE=3 SV=3	C_familiaris	1	1	1
Medium	A0A5F4DBV4	Retinol binding protein 2 OS=Canis lupus familiaris OX=9615 GN=RBP2 PE=3 SV=1	C_familiaris	1	2	1
Medium	E2QTQ8	Pyr_redox_2 domain-containing protein OS=Canis lupus familiaris OX=9615 GN=SQOR PE=4 SV=1	C_familiaris	1	1	1
Medium	E2RIU2	Charged multivesicular body protein 2A OS=Canis lupus familiaris OX=9615 GN=CHMP2A PE=3 SV=2	C_familiaris	1	1	1
Medium	E2RH62	Protein YIPF3 OS=Canis lupus familiaris OX=9615 GN=YIPF3 PE=3 SV=1	C_familiaris	1	2	1
Medium	F1PI77	Guanylate cyclase OS=Canis lupus familiaris OX=9615 GN=GUCY1A2 PE=3 SV=3	C_familiaris	1	1	1
Medium	A0A5F4BTR4	Solute carrier family 8 member A3 OS=Canis lupus familiaris OX=9615 GN=SLC8A3 PE=3 SV=1	C_familiaris	1	1	1
Medium	E2RCH6	NOP2 nucleolar protein OS=Canis lupus familiaris OX=9615 GN=NOP2 PE=3 SV=3	C_familiaris	1	3	1
Medium	J9P0A1	ZFP2 zinc finger protein OS=Canis lupus familiaris OX=9615 GN=ZFP2 PE=4 SV=1	C_familiaris	1	1	1
Medium	A0A5F4D621	N-acetylglucosamine-1-phosphate transferase subunits alpha and beta OS=Canis lupus familiaris OX=9615 GN=GNPTAB PE=3 SV=1	C_familiaris	1	2	1
Medium	F1PLI0	SH3 and multiple ankyrin repeat domains 2 OS=Canis lupus familiaris OX=9615 GN=SHANK2 PE=4 SV=3	C_familiaris	1	1	1
Medium	J9P9U0	Uncharacterized protein OS=Canis lupus familiaris OX=9615 PE=4 SV=2	C_familiaris	1	2	1
Medium	A0A5F4C188	Stathmin 2 OS=Canis lupus familiaris OX=9615 GN=STMN2 PE=3 SV=1	C_familiaris	1	2	1
Medium	F1PS24	Collagen type II alpha 1 chain OS=Canis lupus familiaris OX=9615 GN=COL2A1 PE=4 SV=2	C_familiaris	1	1	1
Medium	F6X725	ATP binding cassette subfamily E member 1 OS=Canis lupus familiaris OX=9615 GN=ABCE1 PE=4 SV=2	C_familiaris	1	1	1
Medium	A0A5F4BVL4	AAA domain-containing protein OS=Canis lupus familiaris OX=9615 GN=VPS4A PE=3 SV=1	C_familiaris	1	1	1
Medium	F1PHD7	Calponin-homology (CH) domain-containing protein OS=Canis lupus familiaris OX=9615 GN=CFAP47 PE=4 SV=3	C_familiaris	1	1	1
Medium	A0A5F4D0W8	LIM domain 7 OS=Canis lupus familiaris OX=9615 GN=LMO7 PE=4 SV=1	C_familiaris	1	1	1
Medium	A0A5F4CKN0	Jumonji domain containing 6, arginine demethylase and lysine hydroxylase OS=Canis lupus familiaris OX=9615 GN=JMJD6 PE=4 SV=1	C_familiaris	1	1	1
Medium	A0A5F4CGH9	Myocardin related transcription factor A OS=Canis lupus familiaris OX=9615 GN=MRTFA PE=4 SV=1	C_familiaris	1	1	1
Medium	A0A5F4BUH3	Uncharacterized protein OS=Canis lupus familiaris OX=9615 PE=3 SV=1	C_familiaris	1	1	1
Medium	F1Q4H7	Zinc finger protein 507 OS=Canis lupus familiaris OX=9615 GN=ZNF507 PE=4 SV=2	C_familiaris	1	1	1
Medium	F6V9G5	Syntaxin 4 OS=Canis lupus familiaris OX=9615 GN=STX4 PE=3 SV=1	C_familiaris	1	1	1
Medium	A0A5F4BSA8	RNA polymerase II subunit A C-terminal domain phosphatase OS=Canis lupus familiaris OX=9615 GN=CTDP1 PE=4 SV=1	C_familiaris	1	1	1
Medium	E2RDE1	Plexin D1 OS=Canis lupus familiaris OX=9615 GN=PLXND1 PE=3 SV=2	C_familiaris	1	1	1
Medium	J9P0U7	Protein-glucosylgalactosylhydroxylysine glucosidase OS=Canis lupus familiaris OX=9615 GN=PGGHG PE=4 SV=2	C_familiaris	1	1	1
Low	A0A5F4D598	Ubiquitin carboxyl-terminal hydrolase OS=Canis lupus familiaris OX=9615 GN=UCHL1 PE=3 SV=1	C_familiaris	1	3	1
Low	A0A5F4CNC8	Solute carrier family 12 member 2 OS=Canis lupus familiaris OX=9615 GN=SLC12A2 PE=3 SV=1	C_familiaris	1	1	1
Low	A0A5F4C9I3	Methylthioribulose-1-phosphate dehydratase OS=Canis lupus familiaris OX=9615 GN=APIP PE=3 SV=1	C_familiaris	1	1	1
Low	A0A5F4CFR6	Inositol polyphosphate-5-phosphatase J OS=Canis lupus familiaris OX=9615 GN=INPP5J PE=4 SV=1	C_familiaris	1	1	1
Low	A0A5F4CKL1	Cullin 9 OS=Canis lupus familiaris OX=9615 GN=CUL9 PE=3 SV=1	C_familiaris	1	1	1
Low	J9NZ45	RAP2B, member of RAS oncogene family OS=Canis lupus familiaris OX=9615 GN=RAP2B PE=4 SV=2	C_familiaris	1	1	1
Low	A0A5F4CXM3	TAO kinase 3 OS=Canis lupus familiaris OX=9615 GN=TAOK3 PE=4 SV=1	C_familiaris	2	2	1
High	A0A5F4DC86	Actinin alpha 4 OS=Canis lupus familiaris OX=9615 GN=ACTN4 PE=4 SV=1	C_familiaris	25	59	0
High	A0A5F4DDL4	Ig-like domain-containing protein OS=Canis lupus familiaris OX=9615 PE=4 SV=1	C_familiaris	16	170	0
High	A0A5F4C146	Actinin alpha 4 OS=Canis lupus familiaris OX=9615 GN=ACTN4 PE=3 SV=1	C_familiaris	18	46	0
High	A0A5F4CDQ5	Ig-like domain-containing protein OS=Canis lupus familiaris OX=9615 PE=4 SV=1	C_familiaris	11	85	0
High	E2QUQ0	Actinin alpha 2 OS=Canis lupus familiaris OX=9615 GN=ACTN2 PE=3 SV=2	C_familiaris	11	20	0
High	L7N094	Keratin 3 OS=Canis lupus familiaris OX=9615 GN=KRT3 PE=3 SV=2	C_familiaris	8	15	0
High	E2QWM4	Spectrin beta, non-erythrocytic 4 OS=Canis lupus familiaris OX=9615 GN=SPTBN4 PE=3 SV=2	C_familiaris	3	7	0
High	A0A5F4D8T4	Keratin 80 OS=Canis lupus familiaris OX=9615 GN=KRT80 PE=4 SV=1	C_familiaris	2	2	0

## Sheet: 3
Protein FDR Confidence	Accession	Description	Marked as	Peptides	PSMs	Unique Peptides
High	F1P8Z5	Apolipoprotein B OS=Canis lupus familiaris OX=9615 GN=APOB PE=4 SV=2	C_familiaris	225	2192	220
High	E2R1P6	Spectrin alpha, erythrocytic 1 OS=Canis lupus familiaris OX=9615 GN=SPTA1 PE=3 SV=3	C_familiaris	92	295	92
High	F1PGM1	C3-beta-c OS=Canis lupus familiaris OX=9615 GN=C3 PE=4 SV=2	C_familiaris	95	3365	87
High	F1Q253	Spectrin beta chain OS=Canis lupus familiaris OX=9615 GN=SPTB PE=3 SV=3	C_familiaris	74	207	74
High	F6UME0	Uncharacterized protein OS=Canis lupus familiaris OX=9615 GN=LOC477699 PE=3 SV=1	C_familiaris	75	2481	68
High	A0A5F4D5S2	C4a anaphylatoxin OS=Canis lupus familiaris OX=9615 PE=4 SV=1	C_familiaris	73	1029	68
High	E2R4Q1	LDL receptor related protein 1 OS=Canis lupus familiaris OX=9615 GN=LRP1 PE=3 SV=3	C_familiaris	68	156	68
High	F1PEU6	Hemicentin 2 OS=Canis lupus familiaris OX=9615 GN=HMCN2 PE=4 SV=3	C_familiaris	56	114	56
High	E2RK21	Uncharacterized protein OS=Canis lupus familiaris OX=9615 GN=CFH PE=4 SV=3	C_familiaris	54	613	54
High	F1PAQ3	Maltase-glucoamylase OS=Canis lupus familiaris OX=9615 GN=MGAM PE=3 SV=3	C_familiaris	54	205	51
High	F1PBI6	Thrombospondin 1 OS=Canis lupus familiaris OX=9615 GN=THBS1 PE=3 SV=3	C_familiaris	48	364	48
High	A0A5F4CG91	von Willebrand factor OS=Canis lupus familiaris OX=9615 GN=VWF PE=4 SV=1	C_familiaris	46	129	46
High	J9P430	Beta-1 metal-binding globulin OS=Canis lupus familiaris OX=9615 GN=TF PE=3 SV=1	C_familiaris	47	604	45
High	F1P707	Anaphylatoxin-like domain-containing protein OS=Canis lupus familiaris OX=9615 GN=LOC484960 PE=4 SV=3	C_familiaris	45	151	45
High	A0A5F4BYK6	Tenascin C OS=Canis lupus familiaris OX=9615 GN=TNC PE=3 SV=1	C_familiaris	42	111	42
High	F1P7J4	Complement C5 OS=Canis lupus familiaris OX=9615 GN=C5 PE=4 SV=3	C_familiaris	42	233	39
High	F1PN98	Coagulation factor V OS=Canis lupus familiaris OX=9615 GN=F5 PE=3 SV=2	C_familiaris	37	118	37
High	F1Q421	Plasminogen OS=Canis lupus familiaris OX=9615 GN=PLG PE=3 SV=2	C_familiaris	39	229	35
High	F1PRD8	Ankyrin 1 OS=Canis lupus familiaris OX=9615 GN=ANK1 PE=4 SV=3	C_familiaris	35	83	35
High	F1PDJ5	Apolipoprotein A-I OS=Canis lupus familiaris OX=9615 GN=APOA1 PE=3 SV=1	C_familiaris	34	773	34
High	H9GWY3	Inter-alpha-trypsin inhibitor heavy chain 4 OS=Canis lupus familiaris OX=9615 GN=ITIH4 PE=3 SV=3	C_familiaris	31	165	31
High	E2RG01	Complement C7 OS=Canis lupus familiaris OX=9615 GN=C7 PE=3 SV=3	C_familiaris	29	103	29
High	F1PGS2	Fibrinogen beta chain OS=Canis lupus familiaris OX=9615 GN=FGB PE=4 SV=2	C_familiaris	27	148	27
High	F1P903	Complement subcomponent C1r OS=Canis lupus familiaris OX=9615 GN=C1R PE=4 SV=2	C_familiaris	27	202	27
High	F1PEN6	Transferrin receptor protein 1 OS=Canis lupus familiaris OX=9615 GN=TFRC PE=3 SV=2	C_familiaris	27	116	27
High	F6Y6T8	Uncharacterized protein OS=Canis lupus familiaris OX=9615 GN=PIGR PE=4 SV=2	C_familiaris	26	139	26
High	F1PSS8	Vitamin K-dependent protein S OS=Canis lupus familiaris OX=9615 GN=PROS1 PE=4 SV=3	C_familiaris	29	308	25
High	E2QZQ1	Transferrin OS=Canis lupus familiaris OX=9615 GN=TF PE=3 SV=2	C_familiaris	25	98	25
High	A0A5F4BS96	Complement C1s OS=Canis lupus familiaris OX=9615 GN=C1S PE=4 SV=1	C_familiaris	24	168	24
High	F1PG16	Uncharacterized protein OS=Canis lupus familiaris OX=9615 GN=CD5L PE=4 SV=2	C_familiaris	24	684	23
High	A0A5F4BY85	Glycosyl-phosphatidylinositol-specific phospholipase D OS=Canis lupus familiaris OX=9615 GN=GPLD1 PE=3 SV=1	C_familiaris	23	107	23
High	P18649	Apolipoprotein E OS=Canis lupus familiaris OX=9615 GN=APOE PE=1 SV=3	C_familiaris	22	648	22
High	A0A5F4DEY2	Ceruloplasmin OS=Canis lupus familiaris OX=9615 GN=CP PE=3 SV=1	C_familiaris	22	84	22
High	F1PR31	Collagen type VI alpha 3 chain OS=Canis lupus familiaris OX=9615 GN=COL6A3 PE=4 SV=3	C_familiaris	22	44	22
High	Q2Z1P8	Anion exchange protein OS=Canis lupus familiaris OX=9615 GN=SLC4A1 PE=2 SV=1	C_familiaris	21	161	21
High	J9NSF9	Activation peptide fragment 1 OS=Canis lupus familiaris OX=9615 GN=F2 PE=4 SV=2	C_familiaris	21	113	21
High	A0A5F4CNZ1	Complement component C6 OS=Canis lupus familiaris OX=9615 GN=C6 PE=3 SV=1	C_familiaris	21	51	21
High	J9NVC6	Immunoglobulin heavy constant mu OS=Canis lupus familiaris OX=9615 GN=IGHM PE=4 SV=2	C_familiaris	21	1450	20
High	A0A5F4BXN3	Actin-depolymerizing factor OS=Canis lupus familiaris OX=9615 GN=GSN PE=3 SV=1	C_familiaris	20	129	20
High	P19006	Haptoglobin OS=Canis lupus familiaris OX=9615 GN=HP PE=1 SV=2	C_familiaris	20	277	20
High	F1PG39	Inter-alpha-trypsin inhibitor heavy chain 2 OS=Canis lupus familiaris OX=9615 GN=ITIH2 PE=3 SV=3	C_familiaris	19	203	19
High	F1PKX3	Coagulation factor XIII A chain OS=Canis lupus familiaris OX=9615 GN=F13A1 PE=3 SV=2	C_familiaris	19	60	19
High	F1P8G0	Fibrinogen gamma chain OS=Canis lupus familiaris OX=9615 GN=FGG PE=4 SV=2	C_familiaris	18	113	18
High	A0A5F4CHN8	Thrombospondin 4 OS=Canis lupus familiaris OX=9615 GN=THBS4 PE=3 SV=1	C_familiaris	20	71	18
High	E2RS75	C3/C5 convertase OS=Canis lupus familiaris OX=9615 GN=CFB PE=4 SV=2	C_familiaris	18	73	18
High	A0A5F4CNE2	Cartilage oligomeric matrix protein OS=Canis lupus familiaris OX=9615 GN=COMP PE=3 SV=1	C_familiaris	20	56	18
High	A0A5F4C0A8	Coagulation factor XIII B chain OS=Canis lupus familiaris OX=9615 GN=F13B PE=4 SV=1	C_familiaris	18	68	18
High	E2RL88	Integrin subunit alpha 6 OS=Canis lupus familiaris OX=9615 GN=ITGA6 PE=3 SV=2	C_familiaris	18	34	18
High	F1PGM9	Complement component 4 binding protein alpha OS=Canis lupus familiaris OX=9615 GN=C4BPA PE=4 SV=3	C_familiaris	39	1933	17
High	F1PBL4	Fibrinogen alpha chain OS=Canis lupus familiaris OX=9615 GN=FGA PE=4 SV=2	C_familiaris	17	60	17
High	E2R0T6	Heat shock protein family A (Hsp70) member 8 OS=Canis lupus familiaris OX=9615 GN=HSPA8 PE=3 SV=1	C_familiaris	20	55	17
High	E2R5W6	Gc-globulin OS=Canis lupus familiaris OX=9615 GN=GC PE=4 SV=3	C_familiaris	17	54	17
High	J9NZL6	Reelin OS=Canis lupus familiaris OX=9615 GN=RELN PE=3 SV=2	C_familiaris	17	29	17
High	E2R7A3	Complement factor I OS=Canis lupus familiaris OX=9615 GN=CFI PE=4 SV=3	C_familiaris	16	89	16
High	A0A5F4CWL0	Galectin-3-binding protein OS=Canis lupus familiaris OX=9615 GN=CANT1 PE=4 SV=1	C_familiaris	16	64	16
High	F1PPG5	Integrin beta OS=Canis lupus familiaris OX=9615 GN=ITGB3 PE=3 SV=2	C_familiaris	16	49	16
High	F6USM4	Mannan binding lectin serine peptidase 2 OS=Canis lupus familiaris OX=9615 GN=MASP2 PE=4 SV=1	C_familiaris	16	35	16
High	E2RQF8	Extracellular matrix protein 1 OS=Canis lupus familiaris OX=9615 GN=ECM1 PE=4 SV=3	C_familiaris	16	49	16
High	E2RES2	Antithrombin-III OS=Canis lupus familiaris OX=9615 GN=SERPINC1 PE=3 SV=3	C_familiaris	22	114	15
High	A0A5S6DEE6	Clusterin OS=Canis lupus familiaris OX=9615 GN=CLU PE=3 SV=1	C_familiaris	15	106	15
High	A0A5F4D8A3	Low density lipoprotein receptor OS=Canis lupus familiaris OX=9615 GN=LDLR PE=4 SV=1	C_familiaris	15	48	15
High	F1Q094	Platelet-activating factor acetylhydrolase OS=Canis lupus familiaris OX=9615 GN=PLA2G7 PE=4 SV=1	C_familiaris	15	50	15
High	E2RS79	C3/C5 convertase OS=Canis lupus familiaris OX=9615 GN=C2 PE=4 SV=2	C_familiaris	15	37	15
High	J9P7F7	Ficolin 1 OS=Canis lupus familiaris OX=9615 GN=FCN1 PE=3 SV=1	C_familiaris	14	224	14
High	E2RJY0	Potassium channel tetramerization domain containing 12 OS=Canis lupus familiaris OX=9615 GN=KCTD12 PE=4 SV=2	C_familiaris	14	65	14
High	A0A5F4DKK2	Attractin OS=Canis lupus familiaris OX=9615 GN=ATRN PE=4 SV=1	C_familiaris	14	48	14
High	E2QZN8	Pentraxin 3 OS=Canis lupus familiaris OX=9615 GN=PTX3 PE=4 SV=2	C_familiaris	14	59	14
High	E2R109	Complement C8 alpha chain OS=Canis lupus familiaris OX=9615 GN=C8A PE=3 SV=1	C_familiaris	14	46	14
High	A0A5F4CTD0	Alpha-1-B glycoprotein OS=Canis lupus familiaris OX=9615 GN=A1BG PE=4 SV=1	C_familiaris	14	51	14
High	E2R1N7	Prenylcysteine oxidase 1 OS=Canis lupus familiaris OX=9615 GN=PCYOX1 PE=3 SV=1	C_familiaris	14	36	14
High	Q6QNF4	Hepatocyte growth factor activator OS=Canis lupus familiaris OX=9615 GN=HGFAC PE=2 SV=1	C_familiaris	13	28	13
High	E2RFV9	Complement C9 OS=Canis lupus familiaris OX=9615 GN=C9 PE=3 SV=3	C_familiaris	13	36	13
High	E2RT60	Integrin beta OS=Canis lupus familiaris OX=9615 GN=ITGB1 PE=3 SV=3	C_familiaris	13	53	13
High	F1PXD6	Proteoglycan 4 OS=Canis lupus familiaris OX=9615 GN=PRG4 PE=4 SV=3	C_familiaris	13	61	13
High	E2QXN8	Annexin OS=Canis lupus familiaris OX=9615 GN=ANXA11 PE=3 SV=2	C_familiaris	13	27	13
High	A0A5F4BSV4	Uncharacterized protein OS=Canis lupus familiaris OX=9615 GN=FBN1 PE=3 SV=1	C_familiaris	13	19	13
High	A0A5F4BUK5	Integrin subunit alpha 2 OS=Canis lupus familiaris OX=9615 GN=ITGA2 PE=3 SV=1	C_familiaris	13	26	13
High	P33703	Beta-2-glycoprotein 1 OS=Canis lupus familiaris OX=9615 GN=APOH PE=2 SV=1	C_familiaris	12	96	12
High	F1PNR5	Coagulation factor XI OS=Canis lupus familiaris OX=9615 GN=F11 PE=3 SV=3	C_familiaris	21	52	12
High	E2R141	Complement component 8 subunit beta OS=Canis lupus familiaris OX=9615 GN=C8B PE=3 SV=1	C_familiaris	12	37	12
High	F6XYK7	Adducin 2 OS=Canis lupus familiaris OX=9615 GN=ADD2 PE=3 SV=1	C_familiaris	13	33	12
High	E2R4V3	Serpin family F member 2 OS=Canis lupus familiaris OX=9615 GN=SERPINF2 PE=3 SV=1	C_familiaris	12	38	12
High	F1PNS6	Peptidase D OS=Canis lupus familiaris OX=9615 GN=PEPD PE=3 SV=3	C_familiaris	12	26	12
High	E2RJW7	Adducin 1 OS=Canis lupus familiaris OX=9615 GN=ADD1 PE=3 SV=3	C_familiaris	13	33	12
High	F1PKB2	Alpha-mannosidase OS=Canis lupus familiaris OX=9615 GN=MAN2B1 PE=3 SV=2	C_familiaris	12	32	12
High	E2RLN1	Serpin family D member 1 OS=Canis lupus familiaris OX=9615 GN=SERPIND1 PE=3 SV=2	C_familiaris	12	33	12
High	J9P9J6	Uncharacterized protein OS=Canis lupus familiaris OX=9615 PE=4 SV=2	C_familiaris	11	329	11
High	E2RH18	Complement factor properdin OS=Canis lupus familiaris OX=9615 GN=CFP PE=4 SV=1	C_familiaris	11	112	11
High	F1PYX9	Serpin family G member 1 OS=Canis lupus familiaris OX=9615 GN=SERPING1 PE=3 SV=3	C_familiaris	11	82	11
High	F1PZR4	Amyloid beta precursor protein binding family B member 1 OS=Canis lupus familiaris OX=9615 GN=APBB1 PE=4 SV=3	C_familiaris	11	62	11
High	A0A5F4CZM1	Sulfhydryl oxidase OS=Canis lupus familiaris OX=9615 GN=QSOX1 PE=3 SV=1	C_familiaris	11	29	11
High	F1PRR4	Vasodilator-stimulated phosphoprotein OS=Canis lupus familiaris OX=9615 GN=VASP PE=3 SV=1	C_familiaris	11	25	11
High	Q28260	Vascular cell adhesion protein 1 OS=Canis lupus familiaris OX=9615 GN=VCAM1 PE=2 SV=1	C_familiaris	11	20	11
High	E2RPW3	Paraoxonase 3 OS=Canis lupus familiaris OX=9615 GN=PON3 PE=3 SV=3	C_familiaris	10	70	10
High	J9P1G2	Adiponectin A OS=Canis lupus familiaris OX=9615 GN=C1QB PE=4 SV=1	C_familiaris	10	235	10
High	E2R3R2	Proteasome subunit beta OS=Canis lupus familiaris OX=9615 GN=PSMB5 PE=3 SV=1	C_familiaris	10	36	10
High	F1PZC6	Histidine rich glycoprotein OS=Canis lupus familiaris OX=9615 GN=HRG PE=4 SV=3	C_familiaris	10	50	10
High	A0A5F4C477	Fibulin-1 OS=Canis lupus familiaris OX=9615 GN=FBLN1 PE=3 SV=1	C_familiaris	10	32	10
High	E2QY46	Dicarbonyl and L-xylulose reductase OS=Canis lupus familiaris OX=9615 GN=DCXR PE=4 SV=2	C_familiaris	10	26	10
High	J9PAA4	Carboxypeptidase N subunit 2 OS=Canis lupus familiaris OX=9615 GN=CPN2 PE=4 SV=1	C_familiaris	10	38	10
High	F1P9U4	Dihydropyrimidinase-related protein 2 OS=Canis lupus familiaris OX=9615 GN=DPYSL2 PE=3 SV=2	C_familiaris	11	15	10
High	E2RMN2	Proteasome subunit alpha type OS=Canis lupus familiaris OX=9615 GN=PSMA6 PE=3 SV=1	C_familiaris	10	31	10
High	F1PAB0	Uncharacterized protein OS=Canis lupus familiaris OX=9615 GN=LOC489647 PE=4 SV=3	C_familiaris	10	30	10
High	A0A5F4D7Z5	Filamin A OS=Canis lupus familiaris OX=9615 GN=FLNA PE=3 SV=1	C_familiaris	10	19	10
High	J9NSQ6	Heparan sulfate proteoglycan 2 OS=Canis lupus familiaris OX=9615 GN=HSPG2 PE=4 SV=2	C_familiaris	10	17	10
High	F1PEN8	Carboxylic ester hydrolase OS=Canis lupus familiaris OX=9615 GN=BCHE PE=3 SV=1	C_familiaris	10	20	10
High	F1PNV5	Coagulation factor XI OS=Canis lupus familiaris OX=9615 GN=F11 PE=4 SV=3	C_familiaris	18	59	9
High	E2R8K8	Uncharacterized protein OS=Canis lupus familiaris OX=9615 GN=LOC490399 PE=4 SV=3	C_familiaris	10	40	9
High	F1PRU9	Integrin subunit alpha 2b OS=Canis lupus familiaris OX=9615 GN=ITGA2B PE=3 SV=2	C_familiaris	9	20	9
High	F1Q0A7	Sushi, von Willebrand factor type A, EGF and pentraxin domain containing 1 OS=Canis lupus familiaris OX=9615 GN=SVEP1 PE=4 SV=3	C_familiaris	9	19	9
High	F1PQ85	Mannan binding lectin serine peptidase 1 OS=Canis lupus familiaris OX=9615 GN=MASP1 PE=4 SV=3	C_familiaris	21	92	8
High	J9NUI6	Alpha-1-microglobulin OS=Canis lupus familiaris OX=9615 GN=AMBP PE=3 SV=1	C_familiaris	8	79	8
High	F1PF02	Proteasome subunit beta OS=Canis lupus familiaris OX=9615 GN=PSMB1 PE=3 SV=3	C_familiaris	8	31	8
High	A0A0B4J198	Adiponectin D OS=Canis lupus familiaris OX=9615 GN=EIF4A2 PE=4 SV=2	C_familiaris	9	135	8
High	A0A5F4DDG2	Myristoylated alanine rich protein kinase C substrate OS=Canis lupus familiaris OX=9615 GN=MARCKS PE=3 SV=1	C_familiaris	8	31	8
High	E2QX17	Proteasome subunit beta OS=Canis lupus familiaris OX=9615 GN=PSMB3 PE=3 SV=1	C_familiaris	8	29	8
High	E2RT39	Maltase-glucoamylase 2 (putative) OS=Canis lupus familiaris OX=9615 GN=MGAM2 PE=3 SV=3	C_familiaris	11	26	8
High	F1Q3I5	Collagen alpha-1(I) chain OS=Canis lupus familiaris OX=9615 GN=COL1A1 PE=4 SV=3	C_familiaris	8	24	8
High	A0A5F4DH03	Coagulation factor X OS=Canis lupus familiaris OX=9615 GN=F10 PE=4 SV=1	C_familiaris	8	25	8
High	F1PYM4	Insulin like growth factor binding protein acid labile subunit OS=Canis lupus familiaris OX=9615 GN=IGFALS PE=4 SV=2	C_familiaris	8	14	8
High	A0A5F4D6V1	Carboxypeptidase B2 OS=Canis lupus familiaris OX=9615 GN=CPB2 PE=3 SV=1	C_familiaris	8	21	8
High	A0A5F4C7K2	Uncharacterized protein OS=Canis lupus familiaris OX=9615 GN=VTN PE=4 SV=1	C_familiaris	8	34	8
High	E2QZ19	Serum albumin OS=Canis lupus familiaris OX=9615 GN=AFP PE=4 SV=2	C_familiaris	8	21	8
High	F1PZA0	Delta-aminolevulinic acid dehydratase OS=Canis lupus familiaris OX=9615 GN=ALAD PE=3 SV=2	C_familiaris	8	16	8
High	F1PH87	Serpin family A member 3 OS=Canis lupus familiaris OX=9615 GN=SERPINA3 PE=3 SV=3	C_familiaris	8	23	8
High	A0A5F4C6Q3	Amine oxidase OS=Canis lupus familiaris OX=9615 GN=AOC3 PE=3 SV=1	C_familiaris	8	16	8
High	F1PD51	Erythrocyte membrane protein band 4.2 OS=Canis lupus familiaris OX=9615 GN=EPB42 PE=3 SV=3	C_familiaris	8	13	8
High	A0A5S6CZL3	Apolipoprotein A-IV OS=Canis lupus familiaris OX=9615 GN=APOA4 PE=3 SV=1	C_familiaris	26	195	7
High	F1PNY2	Immunoglobulin kappa constant OS=Canis lupus familiaris OX=9615 GN=IGKC PE=4 SV=3	C_familiaris	7	800	7
High	E2RNG3	Carboxypeptidase N subunit 1 OS=Canis lupus familiaris OX=9615 GN=CPN1 PE=3 SV=2	C_familiaris	7	28	7
High	F1PP29	Uncharacterized protein OS=Canis lupus familiaris OX=9615 PE=4 SV=2	C_familiaris	7	31	7
High	F1PCE5	Serpin family A member 1 OS=Canis lupus familiaris OX=9615 GN=SERPINA1 PE=3 SV=3	C_familiaris	7	57	7
High	J9NYG8	Complement component 4 binding protein beta OS=Canis lupus familiaris OX=9615 GN=C4BPB PE=4 SV=1	C_familiaris	7	42	7
High	H9GWG4	Inter-alpha-trypsin inhibitor heavy chain 3 OS=Canis lupus familiaris OX=9615 GN=ITIH3 PE=3 SV=3	C_familiaris	9	23	7
High	A0A5F4BPC8	Fetuin B OS=Canis lupus familiaris OX=9615 GN=FETUB PE=4 SV=1	C_familiaris	7	31	7
High	A0A5F4CUH8	Golgi membrane protein 1 OS=Canis lupus familiaris OX=9615 GN=GOLM1 PE=3 SV=1	C_familiaris	7	16	7
High	J9NWG4	C-type lectin domain-containing protein OS=Canis lupus familiaris OX=9615 GN=MBL2 PE=4 SV=2	C_familiaris	7	71	7
High	J9NX73	Ribose-5-phosphate isomerase OS=Canis lupus familiaris OX=9615 GN=RPIA PE=3 SV=1	C_familiaris	7	15	7
High	Q28259	Glyceraldehyde-3-phosphate dehydrogenase OS=Canis lupus familiaris OX=9615 GN=GAPDH PE=2 SV=3	C_familiaris	7	14	7
High	A0A5F4CZY7	Proteasome subunit alpha type OS=Canis lupus familiaris OX=9615 GN=PSMA1 PE=3 SV=1	C_familiaris	7	26	7
High	F1PXF9	Hemicentin 1 OS=Canis lupus familiaris OX=9615 GN=HMCN1 PE=4 SV=2	C_familiaris	7	9	7
High	A0A5F4CKY1	A-kinase anchoring protein 12 OS=Canis lupus familiaris OX=9615 GN=AKAP12 PE=4 SV=1	C_familiaris	7	9	7
High	A0A5F4CED7	Plasma retinol-binding protein OS=Canis lupus familiaris OX=9615 GN=RBP4 PE=3 SV=1	C_familiaris	7	11	7
High	E2RE76	Apolipoprotein A-IV OS=Canis lupus familiaris OX=9615 GN=APOA4 PE=3 SV=2	C_familiaris	25	186	6
High	E2RBR6	Proteasome subunit beta OS=Canis lupus familiaris OX=9615 GN=PSMB4 PE=3 SV=1	C_familiaris	6	24	6
High	J9P889	Collagen type VI alpha 1 chain OS=Canis lupus familiaris OX=9615 GN=COL6A1 PE=4 SV=2	C_familiaris	12	19	6
High	J9JHH5	Joining chain of multimeric IgA and IgM OS=Canis lupus familiaris OX=9615 GN=JCHAIN PE=4 SV=1	C_familiaris	6	77	6
High	A0A5F4CWA9	Proteasome subunit alpha type OS=Canis lupus familiaris OX=9615 GN=PSMA2 PE=3 SV=1	C_familiaris	6	28	6
High	F1PIC7	78 kDa glucose-regulated protein OS=Canis lupus familiaris OX=9615 GN=HSPA5 PE=3 SV=2	C_familiaris	8	26	6
High	E2RLK6	Adiponectin F1 OS=Canis lupus familiaris OX=9615 GN=LOC609026 PE=4 SV=1	C_familiaris	6	19	6
High	J9P028	Glutathione peroxidase OS=Canis lupus familiaris OX=9615 GN=GPX3 PE=3 SV=2	C_familiaris	6	33	6
High	Q6Q7P4	Protein 4.1 OS=Canis lupus familiaris OX=9615 GN=EPB41 PE=2 SV=1	C_familiaris	6	12	6
High	F1PHY1	Collagen alpha-2(I) chain OS=Canis lupus familiaris OX=9615 GN=COL1A2 PE=4 SV=1	C_familiaris	6	9	6
High	E2R2F7	Sex hormone binding globulin OS=Canis lupus familiaris OX=9615 GN=SHBG PE=4 SV=1	C_familiaris	6	10	6
High	Q28256	Platelet glycoprotein Ib alpha chain OS=Canis lupus familiaris OX=9615 GN=GP1BA PE=2 SV=2	C_familiaris	6	18	6
High	Q95MP7	Ferritin heavy chain OS=Canis lupus familiaris OX=9615 GN=FTH1 PE=2 SV=3	C_familiaris	6	10	6
High	F1PAL5	Angiotensin 1-10 OS=Canis lupus familiaris OX=9615 GN=AGT PE=3 SV=3	C_familiaris	6	10	6
High	F1PHD0	Carboxyl ester lipase OS=Canis lupus familiaris OX=9615 GN=CEL PE=3 SV=2	C_familiaris	6	9	6
High	E2RLQ9	15S Mg(2+)-ATPase p97 subunit OS=Canis lupus familiaris OX=9615 GN=VCP PE=3 SV=3	C_familiaris	6	9	6
High	A0A5F4CYE2	Protein-tyrosine-phosphatase OS=Canis lupus familiaris OX=9615 GN=PTPRF PE=3 SV=1	C_familiaris	6	7	6
High	E2RMF9	Serpin family A member 5 OS=Canis lupus familiaris OX=9615 GN=SERPINA5 PE=3 SV=2	C_familiaris	6	11	6
High	J9P8M2	Fibronectin OS=Canis lupus familiaris OX=9615 GN=FN1 PE=4 SV=2	C_familiaris	103	2469	5
High	E2RJC2	Complement C1q C chain OS=Canis lupus familiaris OX=9615 GN=C1QC PE=4 SV=2	C_familiaris	5	130	5
High	E2QX53	Glucosamine-6-phosphate isomerase OS=Canis lupus familiaris OX=9615 GN=GNPDA1 PE=3 SV=1	C_familiaris	9	42	5
High	F1PFM6	Collagen type VI alpha 1 chain OS=Canis lupus familiaris OX=9615 GN=COL6A1 PE=4 SV=2	C_familiaris	11	22	5
High	A0A5F4C0D1	Complement C1q subcomponent subunit A OS=Canis lupus familiaris OX=9615 GN=C1QA PE=4 SV=1	C_familiaris	5	82	5
High	E2R8A7	Collectin subfamily member 11 OS=Canis lupus familiaris OX=9615 GN=COLEC11 PE=4 SV=3	C_familiaris	5	16	5
High	Q7YQC6	Heat shock 70 kDa protein 1 OS=Canis lupus familiaris OX=9615 GN=HSPA1 PE=2 SV=1	C_familiaris	7	14	5
High	E2R2K4	RAP1B, member of RAS oncogene family OS=Canis lupus familiaris OX=9615 GN=RAP1B PE=3 SV=1	C_familiaris	5	11	5
High	J9P983	Exostosin like glycosyltransferase 2 OS=Canis lupus familiaris OX=9615 GN=EXTL2 PE=4 SV=2	C_familiaris	5	13	5
High	A0A5F4BQ47	Phospholipid transfer protein OS=Canis lupus familiaris OX=9615 GN=PLTP PE=3 SV=1	C_familiaris	5	13	5
High	F1PQN5	Cofilin, non-muscle isoform OS=Canis lupus familiaris OX=9615 GN=CFL1 PE=3 SV=3	C_familiaris	5	13	5
High	E2RQ71	Apolipoprotein M OS=Canis lupus familiaris OX=9615 GN=APOM PE=3 SV=2	C_familiaris	5	22	5
High	E2R4H4	Proteasome subunit alpha type OS=Canis lupus familiaris OX=9615 GN=PSMA5 PE=3 SV=3	C_familiaris	5	9	5
High	F2Z4Q7	Serpin family F member 1 OS=Canis lupus familiaris OX=9615 GN=SERPINF1 PE=3 SV=1	C_familiaris	5	12	5
High	F1Q317	Galectin OS=Canis lupus familiaris OX=9615 GN=LGALS9 PE=4 SV=1	C_familiaris	5	12	5
High	E2RKR4	Proteasome subunit alpha type OS=Canis lupus familiaris OX=9615 GN=PSMA3 PE=3 SV=2	C_familiaris	5	22	5
High	F1PW10	Transforming growth factor-beta-induced protein ig-h3 OS=Canis lupus familiaris OX=9615 GN=TGFBI PE=4 SV=3	C_familiaris	5	9	5
High	F1P7W0	Uncharacterized protein OS=Canis lupus familiaris OX=9615 GN=SELP PE=3 SV=2	C_familiaris	5	6	5
High	E2RNL8	Apolipoprotein D OS=Canis lupus familiaris OX=9615 GN=APOD PE=3 SV=3	C_familiaris	5	20	5
High	F1Q1K9	Hyaluronan binding protein 2 OS=Canis lupus familiaris OX=9615 GN=HABP2 PE=4 SV=3	C_familiaris	5	6	5
High	F1PHN8	Serpin family A member 4 OS=Canis lupus familiaris OX=9615 GN=SERPINA4 PE=3 SV=3	C_familiaris	5	5	5
High	F1PGY1	Heat shock protein 90 alpha family class A member 1 OS=Canis lupus familiaris OX=9615 GN=HSP90AA1 PE=3 SV=3	C_familiaris	5	11	5
High	F1PKR3	Metavinculin OS=Canis lupus familiaris OX=9615 GN=VCL PE=3 SV=3	C_familiaris	5	6	5
High	F1PB85	Serpin family A member 7 OS=Canis lupus familiaris OX=9615 GN=SERPINA7 PE=3 SV=2	C_familiaris	5	6	5
High	E2R0W5	Uncharacterized protein OS=Canis lupus familiaris OX=9615 GN=CR2 PE=4 SV=3	C_familiaris	5	7	5
High	A0A5F4CWM9	Myosin-9 OS=Canis lupus familiaris OX=9615 GN=MYH9 PE=3 SV=1	C_familiaris	5	8	5
High	E2QXP3	Arginyl aminopeptidase OS=Canis lupus familiaris OX=9615 GN=RNPEP PE=3 SV=2	C_familiaris	5	6	5
High	A0A5F4CX62	ADAM metallopeptidase with thrombospondin type 1 motif 13 OS=Canis lupus familiaris OX=9615 GN=ADAMTS13 PE=4 SV=1	C_familiaris	5	6	5
High	F1Q432	Tenascin XB OS=Canis lupus familiaris OX=9615 GN=TNXB PE=3 SV=3	C_familiaris	5	6	5
High	F1PQ45	Integrin subunit alpha 11 OS=Canis lupus familiaris OX=9615 GN=ITGA11 PE=3 SV=3	C_familiaris	5	7	5
High	A0A5F4D5S9	Fibronectin OS=Canis lupus familiaris OX=9615 GN=FN1 PE=4 SV=1	C_familiaris	102	2414	4
High	A0A5F4CE12	Ig-like domain-containing protein OS=Canis lupus familiaris OX=9615 PE=4 SV=1	C_familiaris	6	242	4
High	O18840	Actin, cytoplasmic 1 OS=Canis lupus familiaris OX=9615 GN=ACTB PE=2 SV=3	C_familiaris	14	47	4
High	E2QUV3	Alpha-2-HS-glycoprotein OS=Canis lupus familiaris OX=9615 GN=AHSG PE=4 SV=2	C_familiaris	4	22	4
High	F1PUB5	Proteasome subunit alpha 7 OS=Canis lupus familiaris OX=9615 GN=PSMA7 PE=3 SV=3	C_familiaris	7	25	4
High	A0A5F4DGD5	Ig-like domain-containing protein OS=Canis lupus familiaris OX=9615 PE=4 SV=1	C_familiaris	4	37	4
High	A0A5F4BYG2	Ig-like domain-containing protein OS=Canis lupus familiaris OX=9615 PE=4 SV=1	C_familiaris	5	54	4
High	A0A5F4C586	Transthyretin OS=Canis lupus familiaris OX=9615 GN=TTR PE=3 SV=1	C_familiaris	4	17	4
High	F1PGD4	Neural EGFL like 2 OS=Canis lupus familiaris OX=9615 GN=NELL2 PE=4 SV=3	C_familiaris	4	7	4
High	F1PBT3	Fructose-bisphosphate aldolase OS=Canis lupus familiaris OX=9615 GN=ALDOA PE=3 SV=3	C_familiaris	5	11	4
High	E2RPC6	Proteasome subunit beta OS=Canis lupus familiaris OX=9615 GN=PSMB7 PE=2 SV=3	C_familiaris	4	13	4
High	J9P346	SCY domain-containing protein OS=Canis lupus familiaris OX=9615 GN=PPBP PE=3 SV=1	C_familiaris	4	12	4
High	J9P064	Collectin subfamily member 10 OS=Canis lupus familiaris OX=9615 GN=COLEC10 PE=4 SV=1	C_familiaris	4	16	4
High	J9P5P9	Apolipoprotein B receptor OS=Canis lupus familiaris OX=9615 GN=APOBR PE=4 SV=1	C_familiaris	4	7	4
High	F1PEM7	Insulin-like growth factor-binding protein 2 OS=Canis lupus familiaris OX=9615 GN=IGFBP2 PE=4 SV=2	C_familiaris	4	7	4
High	A0A5F4D0B9	EGF containing fibulin extracellular matrix protein 1 OS=Canis lupus familiaris OX=9615 GN=EFEMP1 PE=4 SV=1	C_familiaris	4	6	4
High	F1PP08	Dipeptidyl peptidase 4 OS=Canis lupus familiaris OX=9615 GN=DPP4 PE=3 SV=3	C_familiaris	4	6	4
High	A0A5F4BUJ7	Ig-like domain-containing protein OS=Canis lupus familiaris OX=9615 PE=4 SV=1	C_familiaris	4	19	4
High	F1PDY8	Carbonic anhydrase OS=Canis lupus familiaris OX=9615 GN=CA2 PE=3 SV=3	C_familiaris	4	8	4
High	A0A5F4D0M8	Calpain 5 OS=Canis lupus familiaris OX=9615 GN=CAPN5 PE=3 SV=1	C_familiaris	4	9	4
High	E2R9D2	Coagulation factor XII OS=Canis lupus familiaris OX=9615 GN=F12 PE=4 SV=3	C_familiaris	4	5	4
High	A0A5F4CP02	Pyruvate kinase OS=Canis lupus familiaris OX=9615 GN=PKM PE=3 SV=1	C_familiaris	4	5	4
High	E2QSZ5	Coronin OS=Canis lupus familiaris OX=9615 GN=CORO1A PE=3 SV=1	C_familiaris	4	9	4
High	F1PCG4	Peroxiredoxin 2 OS=Canis lupus familiaris OX=9615 GN=PRDX2 PE=3 SV=2	C_familiaris	4	7	4
High	Q5W416	Proteasome subunit beta type-8 OS=Canis lupus familiaris OX=9615 GN=PSMB8 PE=1 SV=1	C_familiaris	4	6	4
High	E2QZT4	Basigin OS=Canis lupus familiaris OX=9615 GN=BSG PE=4 SV=2	C_familiaris	4	6	4
High	F1PMH6	Mannose receptor C-type 1 OS=Canis lupus familiaris OX=9615 GN=MRC1 PE=4 SV=3	C_familiaris	4	5	4
High	J9PBN6	Uncharacterized protein OS=Canis lupus familiaris OX=9615 GN=LOC477699 PE=3 SV=1	C_familiaris	83	3378	3
High	A0A5F4BYJ5	Uncharacterized protein OS=Canis lupus familiaris OX=9615 PE=4 SV=1	C_familiaris	25	1102	3
High	F1Q418	Inter-alpha-trypsin inhibitor heavy chain 1 OS=Canis lupus familiaris OX=9615 GN=ITIH1 PE=3 SV=2	C_familiaris	25	285	3
High	F1PQ99	Mannan binding lectin serine peptidase 1 OS=Canis lupus familiaris OX=9615 GN=MASP1 PE=4 SV=2	C_familiaris	16	77	3
High	J9PAL2	Ig-like domain-containing protein OS=Canis lupus familiaris OX=9615 PE=4 SV=2	C_familiaris	10	247	3
High	A0A5F4CSD5	Ig-like domain-containing protein OS=Canis lupus familiaris OX=9615 PE=4 SV=1	C_familiaris	6	205	3
High	J9PAX5	Ig-like domain-containing protein OS=Canis lupus familiaris OX=9615 PE=4 SV=2	C_familiaris	4	180	3
High	J9NY02	Ig-like domain-containing protein OS=Canis lupus familiaris OX=9615 PE=4 SV=2	C_familiaris	7	199	3
High	A0A5F4DJC7	Ig-like domain-containing protein OS=Canis lupus familiaris OX=9615 PE=4 SV=1	C_familiaris	5	47	3
High	A0A5F4CP54	Ig-like domain-containing protein OS=Canis lupus familiaris OX=9615 PE=4 SV=1	C_familiaris	3	44	3
High	E2QWR0	Surfactant protein D OS=Canis lupus familiaris OX=9615 GN=SFTPD PE=3 SV=1	C_familiaris	3	11	3
High	A0A5F4DFV1	Apolipoprotein C-III OS=Canis lupus familiaris OX=9615 GN=APOC3 PE=3 SV=1	C_familiaris	3	17	3
High	F1PF90	Ig-like domain-containing protein OS=Canis lupus familiaris OX=9615 PE=4 SV=3	C_familiaris	4	35	3
High	F1PH61	Ig-like domain-containing protein OS=Canis lupus familiaris OX=9615 PE=4 SV=3	C_familiaris	4	24	3
High	F1Q4A4	Coagulation factor VII OS=Canis lupus familiaris OX=9615 GN=F10 PE=4 SV=3	C_familiaris	3	6	3
High	F1PIF2	Cathepsin X OS=Canis lupus familiaris OX=9615 GN=CTSZ PE=3 SV=3	C_familiaris	3	12	3
High	A0A5F4CCP6	ANTXR cell adhesion molecule 1 OS=Canis lupus familiaris OX=9615 GN=ANTXR1 PE=3 SV=1	C_familiaris	3	4	3
High	E2RM35	Pyrroline-5-carboxylate reductase OS=Canis lupus familiaris OX=9615 GN=PYCR3 PE=3 SV=2	C_familiaris	3	6	3
High	F1Q057	Peroxidase OS=Canis lupus familiaris OX=9615 GN=PXDN PE=4 SV=3	C_familiaris	3	4	3
High	L7N0E5	Ig-like domain-containing protein OS=Canis lupus familiaris OX=9615 PE=4 SV=2	C_familiaris	3	12	3
High	J9P4J8	Complement factor H related 5 OS=Canis lupus familiaris OX=9615 GN=CFHR5 PE=4 SV=2	C_familiaris	3	5	3
High	A0A5F4CE30	Ig-like domain-containing protein OS=Canis lupus familiaris OX=9615 PE=4 SV=1	C_familiaris	3	15	3
High	F1PDG4	Uncharacterized protein OS=Canis lupus familiaris OX=9615 GN=UBB PE=4 SV=2	C_familiaris	3	10	3
High	E2RK64	Fermitin family member 3 OS=Canis lupus familiaris OX=9615 GN=FERMT3 PE=3 SV=2	C_familiaris	3	6	3
High	E2RTE8	6-pyruvoyl tetrahydrobiopterin synthase OS=Canis lupus familiaris OX=9615 GN=PTS PE=3 SV=1	C_familiaris	3	8	3
High	E2RA67	C-C motif chemokine OS=Canis lupus familiaris OX=9615 GN=CCL14 PE=3 SV=2	C_familiaris	3	5	3
High	A0A5F4CAZ5	Actinin alpha 1 OS=Canis lupus familiaris OX=9615 GN=ACTN1 PE=3 SV=1	C_familiaris	3	3	3
High	E2QZ50	Adenylyl cyclase-associated protein OS=Canis lupus familiaris OX=9615 GN=CAP1 PE=3 SV=1	C_familiaris	3	5	3
High	A0A5F4BY69	Collagen type XII alpha 1 chain OS=Canis lupus familiaris OX=9615 GN=COL12A1 PE=4 SV=1	C_familiaris	3	4	3
High	L7N0L3	Histone H4 OS=Canis lupus familiaris OX=9615 GN=H4C7 PE=3 SV=2	C_familiaris	3	7	3
High	A0A5F4C175	Platelet and endothelial cell adhesion molecule 1 OS=Canis lupus familiaris OX=9615 GN=PECAM1 PE=4 SV=1	C_familiaris	3	5	3
High	E2R0B6	Proteasome subunit beta OS=Canis lupus familiaris OX=9615 GN=PSMB6 PE=3 SV=1	C_familiaris	3	13	3
High	F1PQ91	Insulin-like growth factor-binding protein 3 OS=Canis lupus familiaris OX=9615 GN=IGFBP3 PE=4 SV=2	C_familiaris	3	6	3
High	A0A5F4CTX8	C1q domain-containing protein OS=Canis lupus familiaris OX=9615 GN=C1QTNF3 PE=4 SV=1	C_familiaris	3	8	3
High	F1Q2F7	Collagen type VI alpha 5 chain OS=Canis lupus familiaris OX=9615 GN=COL6A5 PE=4 SV=3	C_familiaris	3	3	3
High	F2Z4Q6	Serum albumin OS=Canis lupus familiaris OX=9615 GN=AFP PE=4 SV=2	C_familiaris	53	2458	2
High	P49822	Albumin OS=Canis lupus familiaris OX=9615 GN=ALB PE=1 SV=3	C_familiaris	53	2345	2
High	A0A5F4BNP2	Uncharacterized protein OS=Canis lupus familiaris OX=9615 PE=4 SV=1	C_familiaris	24	901	2
High	E2R886	Kininogen 1 OS=Canis lupus familiaris OX=9615 GN=KNG1 PE=4 SV=3	C_familiaris	22	180	2
High	A0A5F4DDL4	Ig-like domain-containing protein OS=Canis lupus familiaris OX=9615 PE=4 SV=1	C_familiaris	7	304	2
High	A0A5F4DDY0	Uncharacterized protein OS=Canis lupus familiaris OX=9615 GN=LOC609402 PE=3 SV=1	C_familiaris	11	146	2
High	A0A5F4D3E6	Ig-like domain-containing protein OS=Canis lupus familiaris OX=9615 PE=4 SV=1	C_familiaris	6	173	2
High	A0A5F4CKL2	Ig-like domain-containing protein OS=Canis lupus familiaris OX=9615 PE=4 SV=1	C_familiaris	4	205	2
High	A0A5F4CSF0	Ig-like domain-containing protein OS=Canis lupus familiaris OX=9615 PE=4 SV=1	C_familiaris	8	270	2
High	A0A5F4DCX2	Ig-like domain-containing protein OS=Canis lupus familiaris OX=9615 PE=4 SV=1	C_familiaris	4	153	2
High	A0A5F4CWK7	Ig-like domain-containing protein OS=Canis lupus familiaris OX=9615 PE=4 SV=1	C_familiaris	4	99	2
High	A0A5F4DCA5	Ig-like domain-containing protein OS=Canis lupus familiaris OX=9615 PE=4 SV=1	C_familiaris	4	54	2
High	A0A5F4BR98	Ig-like domain-containing protein OS=Canis lupus familiaris OX=9615 PE=4 SV=1	C_familiaris	8	212	2
High	A0A5F4DAX5	Ig-like domain-containing protein OS=Canis lupus familiaris OX=9615 PE=4 SV=1	C_familiaris	3	40	2
High	A0A5F4CH63	Ig-like domain-containing protein OS=Canis lupus familiaris OX=9615 PE=4 SV=1	C_familiaris	2	50	2
High	A0A5F4CSP7	Ig-like domain-containing protein OS=Canis lupus familiaris OX=9615 PE=4 SV=1	C_familiaris	3	72	2
High	L7N0I0	Ig-like domain-containing protein OS=Canis lupus familiaris OX=9615 PE=4 SV=2	C_familiaris	6	178	2
High	A0A5F4D5I3	Ig-like domain-containing protein OS=Canis lupus familiaris OX=9615 PE=4 SV=1	C_familiaris	4	88	2
High	A0A5F4C8H0	Glucosamine-6-phosphate isomerase OS=Canis lupus familiaris OX=9615 GN=GNPDA2 PE=3 SV=1	C_familiaris	6	26	2
High	H9GWR0	Ig-like domain-containing protein OS=Canis lupus familiaris OX=9615 PE=4 SV=3	C_familiaris	4	102	2
High	A0A5F4C5A8	Ig-like domain-containing protein OS=Canis lupus familiaris OX=9615 PE=4 SV=1	C_familiaris	5	80	2
High	A0A5F4DFV6	Fc receptor like 4 OS=Canis lupus familiaris OX=9615 GN=FCRL4 PE=4 SV=1	C_familiaris	2	14	2
High	P01784	Ig heavy chain V region GOM OS=Canis lupus familiaris OX=9615 PE=1 SV=1	C_familiaris	3	31	2
High	A0A5F4DJ18	Ig-like domain-containing protein OS=Canis lupus familiaris OX=9615 PE=4 SV=1	C_familiaris	3	62	2
High	A0A5F4CZV7	Ig-like domain-containing protein OS=Canis lupus familiaris OX=9615 PE=4 SV=1	C_familiaris	2	29	2
High	A0A5F4DLE0	Ig-like domain-containing protein OS=Canis lupus familiaris OX=9615 PE=4 SV=1	C_familiaris	3	15	2
High	E2RPB8	C-type lectin domain family 3 member B OS=Canis lupus familiaris OX=9615 GN=CLEC3B PE=4 SV=3	C_familiaris	4	13	2
High	E2RGB0	Apolipoprotein C-IV OS=Canis lupus familiaris OX=9615 GN=APOC4 PE=3 SV=3	C_familiaris	2	9	2
High	A0A5F4CBH6	Ig-like domain-containing protein OS=Canis lupus familiaris OX=9615 PE=4 SV=1	C_familiaris	3	40	2
High	A0A5F4DCI7	TR_THY domain-containing protein OS=Canis lupus familiaris OX=9615 PE=4 SV=1	C_familiaris	2	7	2
High	A0A5F4CWQ9	Ig-like domain-containing protein OS=Canis lupus familiaris OX=9615 PE=4 SV=1	C_familiaris	2	13	2
High	F1PKN5	Ig-like domain-containing protein OS=Canis lupus familiaris OX=9615 PE=4 SV=3	C_familiaris	2	16	2
High	A0A5F4DER9	Aquaporin-1 OS=Canis lupus familiaris OX=9615 GN=AQP1 PE=3 SV=1	C_familiaris	2	6	2
High	F6XKC0	Complement C8 gamma chain OS=Canis lupus familiaris OX=9615 GN=C8G PE=3 SV=2	C_familiaris	2	3	2
High	F1PTZ5	CD44 antigen OS=Canis lupus familiaris OX=9615 GN=CD44 PE=4 SV=3	C_familiaris	2	2	2
High	E2RLS3	Heat shock protein 90 alpha family class B member 1 OS=Canis lupus familiaris OX=9615 GN=HSP90AB1 PE=3 SV=2	C_familiaris	3	5	2
High	A0A5S6CLE1	Catalase OS=Canis lupus familiaris OX=9615 GN=CAT PE=3 SV=1	C_familiaris	2	3	2
High	F6V440	Serglycin (Fragment) OS=Canis lupus familiaris OX=9615 GN=SRGN PE=4 SV=2	C_familiaris	2	7	2
High	E2R478	Neuronal pentraxin 1 OS=Canis lupus familiaris OX=9615 GN=NPTX1 PE=4 SV=1	C_familiaris	2	2	2
High	A0A5F4CB33	Anthrax toxin receptor OS=Canis lupus familiaris OX=9615 GN=ANTXR2 PE=3 SV=1	C_familiaris	2	5	2
High	F1Q3C4	Glutathione transferase OS=Canis lupus familiaris OX=9615 GN=LOC479912 PE=3 SV=3	C_familiaris	2	2	2
High	A0A5F4CKE9	Microtubule-associated protein OS=Canis lupus familiaris OX=9615 GN=MAP4 PE=4 SV=1	C_familiaris	2	4	2
High	F1PD34	Secreted phosphoprotein 2 OS=Canis lupus familiaris OX=9615 GN=SPP2 PE=3 SV=2	C_familiaris	2	6	2
High	A0A5F4BU46	Histone H2B OS=Canis lupus familiaris OX=9615 PE=3 SV=1	C_familiaris	2	2	2
High	E2QVU9	Biliverdin reductase B OS=Canis lupus familiaris OX=9615 GN=BLVRB PE=4 SV=1	C_familiaris	2	3	2
High	A0A5F4BY22	EF-hand domain-containing protein OS=Canis lupus familiaris OX=9615 GN=S100A9 PE=4 SV=1	C_familiaris	2	10	2
High	A0A5F4CL79	Biotinidase OS=Canis lupus familiaris OX=9615 GN=BTD PE=3 SV=1	C_familiaris	2	3	2
High	A0A5F4CK68	Versican OS=Canis lupus familiaris OX=9615 GN=VCAN PE=3 SV=1	C_familiaris	2	3	2
High	A0A5F4DI88	Peroxiredoxin 4 OS=Canis lupus familiaris OX=9615 GN=PRDX4 PE=4 SV=1	C_familiaris	2	3	2
High	A0A5F4CIR1	Nidogen 1 OS=Canis lupus familiaris OX=9615 GN=NID1 PE=4 SV=1	C_familiaris	2	2	2
High	E2RP98	Carboxylic ester hydrolase OS=Canis lupus familiaris OX=9615 GN=ACHE PE=3 SV=3	C_familiaris	2	5	2
High	E2QYG1	Periostin OS=Canis lupus familiaris OX=9615 GN=POSTN PE=4 SV=3	C_familiaris	2	3	2
High	Q3BCQ5	Ammonium transporter Rh type A OS=Canis lupus familiaris OX=9615 GN=RHAG PE=2 SV=1	C_familiaris	2	4	2
High	F1PKW7	Tyrosine 3-monooxygenase/tryptophan 5-monooxygenase activation protein beta OS=Canis lupus familiaris OX=9615 GN=YWHAB PE=3 SV=3	C_familiaris	2	3	2
High	F1PG69	Collagen type III alpha 1 chain OS=Canis lupus familiaris OX=9615 GN=COL3A1 PE=4 SV=3	C_familiaris	2	2	2
High	P12278	Apolipoprotein C-II OS=Canis lupus familiaris OX=9615 GN=APOC2 PE=1 SV=1	C_familiaris	2	3	2
High	E2RAK7	Apolipoprotein A-II OS=Canis lupus familiaris OX=9615 GN=APOA2 PE=1 SV=2	C_familiaris	2	6	2
High	F1PIT4	Tetraspanin OS=Canis lupus familiaris OX=9615 GN=CD63 PE=3 SV=2	C_familiaris	2	5	2
High	P38400	Guanine nucleotide-binding protein G(i) subunit alpha-2 OS=Canis lupus familiaris OX=9615 GN=GNAI2 PE=2 SV=2	C_familiaris	2	3	2
High	A0A5F4CS96	Tubulin alpha chain OS=Canis lupus familiaris OX=9615 GN=LOC106557476 PE=3 SV=1	C_familiaris	2	3	2
High	E2QW82	Matrix metallopeptidase 19 OS=Canis lupus familiaris OX=9615 GN=MMP19 PE=3 SV=3	C_familiaris	2	4	2
High	F1PI70	Transforming growth factor beta OS=Canis lupus familiaris OX=9615 GN=TGFB1 PE=3 SV=2	C_familiaris	2	2	2
High	F6Y713	Alpha-1-acid glycoprotein OS=Canis lupus familiaris OX=9615 GN=LOC100685620 PE=3 SV=1	C_familiaris	2	7	2
High	A0A5F4C3I4	ABI family member 3 binding protein OS=Canis lupus familiaris OX=9615 GN=ABI3BP PE=4 SV=1	C_familiaris	2	3	2
High	F1PSC2	Talin 1 OS=Canis lupus familiaris OX=9615 GN=TLN1 PE=4 SV=3	C_familiaris	2	2	2
High	A0A5F4C3K3	RAB1B, member RAS oncogene family OS=Canis lupus familiaris OX=9615 GN=RAB1B PE=4 SV=1	C_familiaris	2	3	2
High	P56595	Apolipoprotein C-I OS=Canis lupus familiaris OX=9615 GN=APOC1 PE=1 SV=1	C_familiaris	2	18	2
High	E2QZ98	Angiopoietin like 3 OS=Canis lupus familiaris OX=9615 GN=ANGPTL3 PE=4 SV=1	C_familiaris	2	3	2
High	F1PIL9	Interleukin 1 receptor accessory protein OS=Canis lupus familiaris OX=9615 GN=IL1RAP PE=3 SV=3	C_familiaris	2	2	2
High	J9JHP2	Histone H2A OS=Canis lupus familiaris OX=9615 GN=H2AC7 PE=3 SV=2	C_familiaris	2	5	2
High	A7VLI5	Glycophorin C OS=Canis lupus familiaris OX=9615 GN=Gypc PE=2 SV=1	C_familiaris	2	2	2
High	F1PUB3	Heart development protein with EGF like domains 1 OS=Canis lupus familiaris OX=9615 GN=HEG1 PE=4 SV=3	C_familiaris	2	2	2
High	A0A5F4CYM9	Annexin OS=Canis lupus familiaris OX=9615 GN=ANXA5 PE=3 SV=1	C_familiaris	2	2	2
High	A0A5F4BQT8	Integrin subunit alpha V OS=Canis lupus familiaris OX=9615 GN=ITGAV PE=3 SV=1	C_familiaris	2	3	2
High	A0A5F4D8T6	AIR carboxylase OS=Canis lupus familiaris OX=9615 GN=PAICS PE=3 SV=1	C_familiaris	2	3	2
High	A0A5F4C6H3	Uncharacterized protein OS=Canis lupus familiaris OX=9615 GN=LOC477699 PE=3 SV=1	C_familiaris	81	3263	1
High	E2RCC8	Uncharacterized protein OS=Canis lupus familiaris OX=9615 PE=4 SV=3	C_familiaris	24	1096	1
High	A0A5F4CIZ1	Uncharacterized protein OS=Canis lupus familiaris OX=9615 PE=4 SV=1	C_familiaris	23	1079	1
High	A0A5F4D6M5	Inter-alpha-trypsin inhibitor heavy chain 1 OS=Canis lupus familiaris OX=9615 GN=ITIH1 PE=3 SV=1	C_familiaris	23	232	1
High	A0A5F4C2N3	Kininogen 1 OS=Canis lupus familiaris OX=9615 GN=KNG1 PE=4 SV=1	C_familiaris	21	173	1
High	A0A5F4C335	Ig-like domain-containing protein OS=Canis lupus familiaris OX=9615 PE=4 SV=1	C_familiaris	8	321	1
High	H9GWR8	Uncharacterized protein OS=Canis lupus familiaris OX=9615 PE=4 SV=2	C_familiaris	7	559	1
High	J9NSQ1	Ig-like domain-containing protein OS=Canis lupus familiaris OX=9615 PE=4 SV=2	C_familiaris	7	552	1
High	P60524	Hemoglobin subunit beta OS=Canis lupus familiaris OX=9615 GN=HBB PE=1 SV=1	C_familiaris	10	145	1
High	A0A5F4C2R6	Ig-like domain-containing protein OS=Canis lupus familiaris OX=9615 PE=4 SV=1	C_familiaris	7	177	1
High	P60529	Hemoglobin subunit alpha OS=Canis lupus familiaris OX=9615 GN=HBA PE=1 SV=1	C_familiaris	8	163	1
High	J9NXL3	Uncharacterized protein OS=Canis lupus familiaris OX=9615 GN=LOC100855540 PE=3 SV=2	C_familiaris	8	156	1
High	L7N0F1	Ig-like domain-containing protein OS=Canis lupus familiaris OX=9615 GN=LOC100687054 PE=4 SV=1	C_familiaris	6	436	1
High	A0A5F4BWC4	Ig-like domain-containing protein OS=Canis lupus familiaris OX=9615 PE=4 SV=1	C_familiaris	7	206	1
High	J9NYY8	Ig-like domain-containing protein OS=Canis lupus familiaris OX=9615 PE=4 SV=2	C_familiaris	6	201	1
High	A0A5F4D2F2	Ig-like domain-containing protein OS=Canis lupus familiaris OX=9615 PE=4 SV=1	C_familiaris	5	192	1
High	A0A5F4CLB9	Ig-like domain-containing protein OS=Canis lupus familiaris OX=9615 PE=4 SV=1	C_familiaris	4	204	1
High	A0A5F4D1B8	Ig-like domain-containing protein OS=Canis lupus familiaris OX=9615 PE=4 SV=1	C_familiaris	7	208	1
High	F2Z4N7	Actin alpha cardiac muscle 1 OS=Canis lupus familiaris OX=9615 GN=ACTC1 PE=3 SV=2	C_familiaris	10	30	1
High	J9P1M7	Ig-like domain-containing protein OS=Canis lupus familiaris OX=9615 PE=4 SV=2	C_familiaris	4	69	1
High	J9NZT2	Ig-like domain-containing protein OS=Canis lupus familiaris OX=9615 PE=4 SV=2	C_familiaris	5	185	1
High	A0A5F4CQG9	Ig-like domain-containing protein OS=Canis lupus familiaris OX=9615 PE=4 SV=1	C_familiaris	5	176	1
High	A0A5F4C493	Ig-like domain-containing protein OS=Canis lupus familiaris OX=9615 PE=4 SV=1	C_familiaris	3	66	1
High	E2RF52	Proteasome subunit alpha type OS=Canis lupus familiaris OX=9615 GN=PSMA8 PE=3 SV=2	C_familiaris	4	15	1
High	A0A5F4D8U5	Actin beta like 2 OS=Canis lupus familiaris OX=9615 GN=ACTBL2 PE=3 SV=1	C_familiaris	7	16	1
High	A0A5F4BUM4	Ig-like domain-containing protein OS=Canis lupus familiaris OX=9615 PE=4 SV=1	C_familiaris	1	8	1
High	A0A5F4DGR2	IGv domain-containing protein OS=Canis lupus familiaris OX=9615 PE=4 SV=1	C_familiaris	1	9	1
High	J9P3L5	Ig-like domain-containing protein OS=Canis lupus familiaris OX=9615 PE=4 SV=2	C_familiaris	2	22	1
High	A0A5F4D071	Ig-like domain-containing protein OS=Canis lupus familiaris OX=9615 PE=4 SV=1	C_familiaris	2	110	1
High	A0A5F4DCG3	Ig-like domain-containing protein OS=Canis lupus familiaris OX=9615 PE=4 SV=1	C_familiaris	2	22	1
High	A0A5F4CI17	Ig-like domain-containing protein OS=Canis lupus familiaris OX=9615 PE=4 SV=1	C_familiaris	2	7	1
High	A0A5F4D946	Ig-like domain-containing protein OS=Canis lupus familiaris OX=9615 PE=4 SV=1	C_familiaris	2	19	1
High	A0A5F4D172	Ig-like domain-containing protein OS=Canis lupus familiaris OX=9615 PE=4 SV=1	C_familiaris	1	12	1
High	A0A5F4BZA4	Microfibril associated protein 4 OS=Canis lupus familiaris OX=9615 GN=MFAP4 PE=4 SV=1	C_familiaris	1	4	1
High	F1Q3Y2	Dihydropyrimidinase like 3 OS=Canis lupus familiaris OX=9615 GN=DPYSL3 PE=3 SV=2	C_familiaris	2	3	1
High	A0A5F4CAX2	Uncharacterized protein OS=Canis lupus familiaris OX=9615 PE=4 SV=1	C_familiaris	1	4	1
High	A0A5F4CGR9	Ig-like domain-containing protein OS=Canis lupus familiaris OX=9615 PE=4 SV=1	C_familiaris	1	6	1
High	A0A5F4DB26	Christmas factor OS=Canis lupus familiaris OX=9615 GN=F9 PE=4 SV=1	C_familiaris	1	2	1
High	P01874	Ig mu chain C region OS=Canis lupus familiaris OX=9615 PE=1 SV=1	C_familiaris	2	79	1
High	F1PL63	Fructose-bisphosphate aldolase OS=Canis lupus familiaris OX=9615 GN=ALDOC PE=3 SV=1	C_familiaris	2	3	1
High	A0A5F4C3J1	Ig-like domain-containing protein OS=Canis lupus familiaris OX=9615 PE=4 SV=1	C_familiaris	3	7	1
High	A0A5F4CE93	IGv domain-containing protein OS=Canis lupus familiaris OX=9615 PE=4 SV=1	C_familiaris	1	7	1
High	A0A5F4C9H9	Ig-like domain-containing protein OS=Canis lupus familiaris OX=9615 PE=4 SV=1	C_familiaris	1	6	1
High	A0A5F4D9M4	Uncharacterized protein OS=Canis lupus familiaris OX=9615 GN=ARF3 PE=3 SV=1	C_familiaris	1	1	1
High	J9P0D4	Ig-like domain-containing protein OS=Canis lupus familiaris OX=9615 PE=4 SV=2	C_familiaris	2	17	1
High	F1PBN7	ADAMTS like 2 OS=Canis lupus familiaris OX=9615 GN=ADAMTSL2 PE=4 SV=2	C_familiaris	1	1	1
High	F1P8N6	Endoplasmin OS=Canis lupus familiaris OX=9615 GN=HSP90B1 PE=3 SV=1	C_familiaris	2	3	1
High	F1PKL6	Ig-like domain-containing protein OS=Canis lupus familiaris OX=9615 PE=4 SV=3	C_familiaris	1	2	1
High	J9NX65	Uncharacterized protein OS=Canis lupus familiaris OX=9615 GN=SBSN PE=4 SV=2	C_familiaris	1	1	1
High	A0A5F4C451	Ig-like domain-containing protein OS=Canis lupus familiaris OX=9615 PE=4 SV=1	C_familiaris	2	4	1
High	A0A5F4CHH4	Pleckstrin OS=Canis lupus familiaris OX=9615 GN=PLEK PE=4 SV=1	C_familiaris	1	2	1
High	F1P9A7	Protein tweety homolog OS=Canis lupus familiaris OX=9615 GN=TTYH3 PE=3 SV=3	C_familiaris	1	1	1
High	P81709	Lysozyme C, spleen isozyme OS=Canis lupus familiaris OX=9615 PE=1 SV=1	C_familiaris	1	2	1
High	A0A5F4C7L7	Tetraspanin OS=Canis lupus familiaris OX=9615 GN=TSPAN9 PE=3 SV=1	C_familiaris	1	1	1
High	F1PCS8	CD93 molecule OS=Canis lupus familiaris OX=9615 GN=CD93 PE=4 SV=2	C_familiaris	1	3	1
High	A0A5F4CZ17	Uncharacterized protein OS=Canis lupus familiaris OX=9615 GN=LOC609365 PE=4 SV=1	C_familiaris	1	2	1
High	A0A5F4D4V2	Sidekick cell adhesion molecule 1 OS=Canis lupus familiaris OX=9615 GN=SDK1 PE=4 SV=1	C_familiaris	1	3	1
High	A0A5F4BSL9	Uncharacterized protein OS=Canis lupus familiaris OX=9615 PE=3 SV=1	C_familiaris	1	2	1
High	A0A5F4D061	Solute carrier family 2, facilitated glucose transporter member 3 OS=Canis lupus familiaris OX=9615 GN=SLC2A3 PE=3 SV=1	C_familiaris	1	2	1
High	F1PQ52	Myeloperoxidase OS=Canis lupus familiaris OX=9615 GN=MPO PE=4 SV=3	C_familiaris	1	1	1
High	E2RRH1	Ferritin OS=Canis lupus familiaris OX=9615 PE=3 SV=1	C_familiaris	1	3	1
High	A0A5F4DF61	Insulin-like growth factor II OS=Canis lupus familiaris OX=9615 GN=IGF2 PE=3 SV=1	C_familiaris	1	2	1
High	F1PCD8	Laminin subunit beta 1 OS=Canis lupus familiaris OX=9615 GN=LAMB1 PE=4 SV=3	C_familiaris	1	3	1
High	L7N0E7	Uncharacterized protein OS=Canis lupus familiaris OX=9615 PE=4 SV=2	C_familiaris	1	3	1
High	F1PKV2	Coactivator-associated arginine methyltransferase 1 OS=Canis lupus familiaris OX=9615 GN=CARM1 PE=4 SV=3	C_familiaris	1	1	1
High	A0A5F4CF70	Solute carrier family 38 member 10 OS=Canis lupus familiaris OX=9615 GN=SLC38A10 PE=4 SV=1	C_familiaris	1	1	1
High	A0A5F4C3G8	Integrin-associated protein OS=Canis lupus familiaris OX=9615 GN=CD47 PE=4 SV=1	C_familiaris	1	2	1
High	A0A5F4CIA0	Aminopeptidase OS=Canis lupus familiaris OX=9615 GN=ANPEP PE=3 SV=1	C_familiaris	1	1	1
High	E2R0D2	Scavenger receptor cysteine rich family member with 5 domains OS=Canis lupus familiaris OX=9615 GN=SSC5D PE=4 SV=3	C_familiaris	1	1	1
High	J9P0G7	Alpha-amylase OS=Canis lupus familiaris OX=9615 GN=LOC607314 PE=3 SV=2	C_familiaris	1	1	1
High	E2RC10	Synaptophysin like 1 OS=Canis lupus familiaris OX=9615 GN=SYPL1 PE=3 SV=3	C_familiaris	1	1	1
High	A0A5F4CLT9	Uncharacterized protein OS=Canis lupus familiaris OX=9615 GN=SDCBP PE=4 SV=1	C_familiaris	1	3	1
High	A0A5F4CW08	Dynamin GTPase OS=Canis lupus familiaris OX=9615 GN=DNM2 PE=3 SV=1	C_familiaris	1	1	1
High	E2REU6	IF rod domain-containing protein OS=Canis lupus familiaris OX=9615 GN=KRT18 PE=3 SV=3	C_familiaris	2	9	1
High	A0A5F4DID6	Ig-like domain-containing protein OS=Canis lupus familiaris OX=9615 PE=4 SV=1	C_familiaris	1	1	1
High	A0A5F4C866	Protein-tyrosine-phosphatase OS=Canis lupus familiaris OX=9615 GN=PTPRG PE=3 SV=1	C_familiaris	1	2	1
High	A0A5F4D728	Tetraspanin 14 OS=Canis lupus familiaris OX=9615 GN=TSPAN14 PE=4 SV=1	C_familiaris	1	2	1
High	A0A5F4C6D8	GTP-binding nuclear protein Ran OS=Canis lupus familiaris OX=9615 PE=3 SV=1	C_familiaris	1	5	1
High	J9NTL5	Glycoprotein Ib platelet subunit beta OS=Canis lupus familiaris OX=9615 GN=GP1BB PE=4 SV=2	C_familiaris	1	3	1
High	J9P7C6	Podocalyxin OS=Canis lupus familiaris OX=9615 GN=PODXL PE=3 SV=2	C_familiaris	1	1	1
High	A0A5F4DDR9	Ras-related protein Rab-5C OS=Canis lupus familiaris OX=9615 GN=RAB5C PE=4 SV=1	C_familiaris	1	3	1
High	F1PHS2	Serpin family A member 11 OS=Canis lupus familiaris OX=9615 GN=SERPINA11 PE=3 SV=2	C_familiaris	1	1	1
High	F1PS47	RAN binding protein 3 OS=Canis lupus familiaris OX=9615 GN=RANBP3 PE=4 SV=3	C_familiaris	1	1	1
High	A0A5F4D392	Clathrin light chain OS=Canis lupus familiaris OX=9615 GN=CLTA PE=3 SV=1	C_familiaris	1	1	1
High	E2RB38	Tropomyosin 3 OS=Canis lupus familiaris OX=9615 GN=TPM3 PE=3 SV=2	C_familiaris	1	1	1
High	E2R034	Molybdopterin molybdenumtransferase OS=Canis lupus familiaris OX=9615 GN=GPHN PE=3 SV=2	C_familiaris	1	1	1
High	A0A5F4CKF4	Tetraspanin OS=Canis lupus familiaris OX=9615 GN=TSPAN2 PE=3 SV=1	C_familiaris	1	1	1
High	A0A5F4C709	ATP binding cassette subfamily B member 6 OS=Canis lupus familiaris OX=9615 GN=ABCB6 PE=4 SV=1	C_familiaris	1	2	1
High	F1PB66	Tetraspanin OS=Canis lupus familiaris OX=9615 GN=CD81 PE=3 SV=2	C_familiaris	1	1	1
High	A0A5F4CNN7	Ig-like domain-containing protein OS=Canis lupus familiaris OX=9615 PE=4 SV=1	C_familiaris	1	14	1
High	P02727	Glycophorin-A OS=Canis lupus familiaris OX=9615 GN=GYPA PE=1 SV=3	C_familiaris	1	2	1
High	F1P8T1	Angiopoietin like 6 OS=Canis lupus familiaris OX=9615 GN=ANGPTL6 PE=4 SV=3	C_familiaris	1	1	1
High	P24406	Transforming protein RhoA OS=Canis lupus familiaris OX=9615 GN=RHOA PE=2 SV=1	C_familiaris	1	1	1
High	A0A5F4D1S9	IGv domain-containing protein OS=Canis lupus familiaris OX=9615 PE=4 SV=1	C_familiaris	1	2	1
High	A0A5F4BYV6	Tenascin N OS=Canis lupus familiaris OX=9615 GN=TNN PE=4 SV=1	C_familiaris	1	1	1
High	J9P2K0	Fibulin 2 OS=Canis lupus familiaris OX=9615 GN=FBLN2 PE=3 SV=1	C_familiaris	1	2	1
High	A0A5F4BQK3	Lysosomal associated membrane protein 2 OS=Canis lupus familiaris OX=9615 GN=LAMP2 PE=3 SV=1	C_familiaris	1	1	1
High	J9NYK7	Uncharacterized protein OS=Canis lupus familiaris OX=9615 GN=MYADM PE=4 SV=1	C_familiaris	1	2	1
High	E2R0K3	Copine 3 OS=Canis lupus familiaris OX=9615 GN=CPNE3 PE=3 SV=2	C_familiaris	1	1	1
High	F1PLS4	IF rod domain-containing protein OS=Canis lupus familiaris OX=9615 GN=VIM PE=3 SV=2	C_familiaris	1	1	1
High	A0A5F4CQ29	V-type proton ATPase subunit G OS=Canis lupus familiaris OX=9615 PE=3 SV=1	C_familiaris	1	6	1
High	A0A5F4CD75	Moesin OS=Canis lupus familiaris OX=9615 GN=MSN PE=4 SV=1	C_familiaris	1	2	1
High	A0A5F4CYS8	AA_permease_C domain-containing protein OS=Canis lupus familiaris OX=9615 PE=4 SV=1	C_familiaris	1	1	1
High	F1P8F7	Monocarboxylate transporter 2 OS=Canis lupus familiaris OX=9615 GN=SLC16A7 PE=3 SV=3	C_familiaris	1	1	1
High	A0A5F4CIT2	Plexin domain containing 2 OS=Canis lupus familiaris OX=9615 GN=PLXDC2 PE=3 SV=1	C_familiaris	1	1	1
High	E2QYQ0	Adenine phosphoribosyltransferase OS=Canis lupus familiaris OX=9615 GN=APRT PE=3 SV=1	C_familiaris	1	1	1
High	A0A5F4CNI4	Solute carrier family 44 member 2 OS=Canis lupus familiaris OX=9615 GN=SLC44A2 PE=3 SV=1	C_familiaris	1	3	1
High	A0A5F4C1I5	Collagen type V alpha 2 chain OS=Canis lupus familiaris OX=9615 GN=COL5A2 PE=4 SV=1	C_familiaris	1	6	1
High	F1PM26	CD109 molecule OS=Canis lupus familiaris OX=9615 GN=CD109 PE=3 SV=3	C_familiaris	1	1	1
High	A0A5F4CFZ9	Cathelicidin antimicrobial peptide OS=Canis lupus familiaris OX=9615 GN=CAMP PE=3 SV=1	C_familiaris	1	1	1
High	F1P832	Alpha-1,4 glucan phosphorylase OS=Canis lupus familiaris OX=9615 GN=PYGM PE=3 SV=2	C_familiaris	1	1	1
High	A0A5F4CIL5	Metalloproteinase inhibitor 3 OS=Canis lupus familiaris OX=9615 GN=TIMP3 PE=3 SV=1	C_familiaris	1	1	1
High	A0A5F4D3V5	Tubulin beta 1 class VI OS=Canis lupus familiaris OX=9615 GN=TUBB1 PE=3 SV=1	C_familiaris	1	1	1
High	A0A5F4CDY4	LIM and senescent cell antigen-like-containing domain protein OS=Canis lupus familiaris OX=9615 GN=LIMS1 PE=4 SV=1	C_familiaris	1	1	1
High	F1PS24	Collagen type II alpha 1 chain OS=Canis lupus familiaris OX=9615 GN=COL2A1 PE=4 SV=2	C_familiaris	1	4	1
High	J9NST4	SelP_N domain-containing protein OS=Canis lupus familiaris OX=9615 GN=SELENOP PE=4 SV=2	C_familiaris	1	2	1
High	A0A5F4CFF9	Vascular endothelial growth factor receptor 3 OS=Canis lupus familiaris OX=9615 GN=FLT4 PE=3 SV=1	C_familiaris	1	4	1
High	E2R6K5	Histone H3 OS=Canis lupus familiaris OX=9615 GN=H3-3A PE=3 SV=1	C_familiaris	1	3	1
Medium	O97555	Rab GDP dissociation inhibitor alpha OS=Canis lupus familiaris OX=9615 GN=GDI1 PE=2 SV=1	C_familiaris	1	2	1
Medium	A0A5F4BRR8	Stomatin OS=Canis lupus familiaris OX=9615 GN=STOM PE=3 SV=1	C_familiaris	1	1	1
Medium	F1PGR0	Disintegrin and metalloproteinase domain-containing protein 10 OS=Canis lupus familiaris OX=9615 GN=ADAM10 PE=4 SV=3	C_familiaris	1	1	1
Medium	A0A5F4D2B4	Cytochrome P450 family 4 subfamily B member 1 OS=Canis lupus familiaris OX=9615 GN=CYP4B1 PE=3 SV=1	C_familiaris	1	1	1
Medium	F1Q3Z3	Solute carrier organic anion transporter family member OS=Canis lupus familiaris OX=9615 GN=SLCO6A1 PE=3 SV=2	C_familiaris	1	32	1
Medium	B8K1W2	Bile salt export pump OS=Canis lupus familiaris OX=9615 GN=Abcb11e PE=1 SV=1	C_familiaris	1	2	1
Medium	F1PFB4	Fermitin family member 2 OS=Canis lupus familiaris OX=9615 GN=FERMT2 PE=4 SV=3	C_familiaris	1	1	1
Medium	F1PBK6	Carbonic anhydrase OS=Canis lupus familiaris OX=9615 GN=CA1 PE=3 SV=2	C_familiaris	1	2	1
Medium	J9P820	Formin homology 2 domain containing 1 OS=Canis lupus familiaris OX=9615 GN=FHOD1 PE=4 SV=1	C_familiaris	1	1	1
Medium	F1PE67	AP-2 complex subunit alpha OS=Canis lupus familiaris OX=9615 GN=AP2A1 PE=3 SV=3	C_familiaris	1	1	1
Medium	F6UQJ5	Uncharacterized protein OS=Canis lupus familiaris OX=9615 GN=LUC7L2 PE=3 SV=1	C_familiaris	1	2	1
Medium	F1PQM7	Tetraspanin OS=Canis lupus familiaris OX=9615 GN=CD9 PE=3 SV=3	C_familiaris	1	5	1
Medium	A0A5F4D7X0	Centrosomal protein 164 OS=Canis lupus familiaris OX=9615 GN=CEP164 PE=4 SV=1	C_familiaris	1	7	1
Medium	A0A5F4DDA4	Autophagy-related protein 9 OS=Canis lupus familiaris OX=9615 GN=ATG9A PE=3 SV=1	C_familiaris	1	1	1
Medium	J9P3S6	Uncharacterized protein OS=Canis lupus familiaris OX=9615 PE=4 SV=1	C_familiaris	1	3	1
Medium	A0A5F4CIX8	Matrix remodeling associated 5 OS=Canis lupus familiaris OX=9615 GN=MXRA5 PE=4 SV=1	C_familiaris	1	1	1
Medium	F1PHD7	Calponin-homology (CH) domain-containing protein OS=Canis lupus familiaris OX=9615 GN=CFAP47 PE=4 SV=3	C_familiaris	1	3	1
Medium	F1PW86	Inositol 1,4,5-trisphosphate receptor type 1 OS=Canis lupus familiaris OX=9615 GN=ITPR1 PE=3 SV=3	C_familiaris	1	1	1
Medium	E2QUB2	Transmembrane protein 62 OS=Canis lupus familiaris OX=9615 GN=TMEM62 PE=4 SV=3	C_familiaris	1	1	1
Medium	A0A5F4D621	N-acetylglucosamine-1-phosphate transferase subunits alpha and beta OS=Canis lupus familiaris OX=9615 GN=GNPTAB PE=3 SV=1	C_familiaris	1	3	1
Medium	A0A5F4CPC4	Ribitol-5-phosphate transferase OS=Canis lupus familiaris OX=9615 GN=FKTN PE=3 SV=1	C_familiaris	1	1	1
Medium	A0A5F4DB97	L-selectin OS=Canis lupus familiaris OX=9615 GN=SELL PE=3 SV=1	C_familiaris	1	2	1
Medium	F1PWR1	Insulin like growth factor 2 receptor OS=Canis lupus familiaris OX=9615 GN=IGF2R PE=4 SV=3	C_familiaris	1	1	1
Medium	A0A5F4CG10	Dual specificity protein phosphatase OS=Canis lupus familiaris OX=9615 GN=DUSP2 PE=3 SV=1	C_familiaris	1	6	1
Medium	A0A5F4DBR8	TNF receptor associated protein 1 OS=Canis lupus familiaris OX=9615 GN=TRAP1 PE=3 SV=1	C_familiaris	1	1	1
Medium	A0A5F4BNJ9	C-type lectin domain containing 7A OS=Canis lupus familiaris OX=9615 GN=CLEC7A PE=4 SV=1	C_familiaris	1	1	1
Medium	A0A5F4DIV0	Regulator of G protein signaling 3 OS=Canis lupus familiaris OX=9615 GN=RGS3 PE=4 SV=1	C_familiaris	1	2	1
Medium	E2RE02	Rho guanine nucleotide exchange factor 17 OS=Canis lupus familiaris OX=9615 GN=ARHGEF17 PE=4 SV=1	C_familiaris	1	1	1
Medium	A0A5F4D5U1	Tyrosine-protein kinase OS=Canis lupus familiaris OX=9615 GN=YES1 PE=3 SV=1	C_familiaris	1	1	1
Medium	E2R8C5	Ig-like domain-containing protein OS=Canis lupus familiaris OX=9615 PE=4 SV=2	C_familiaris	1	2	1
Medium	A0A5F4D7I4	Aldehyde dehydrogenase 1 family member L1 OS=Canis lupus familiaris OX=9615 GN=ALDH1L1 PE=3 SV=1	C_familiaris	1	1	1
Medium	E2RLT0	SET domain containing 5 OS=Canis lupus familiaris OX=9615 GN=SETD5 PE=4 SV=2	C_familiaris	1	1	1
Medium	F1PXV0	Uncharacterized protein OS=Canis lupus familiaris OX=9615 GN=LOC606788 PE=4 SV=2	C_familiaris	1	14	1
Medium	A0A5F4D8R7	ATP binding cassette subfamily A member 12 OS=Canis lupus familiaris OX=9615 GN=ABCA12 PE=4 SV=1	C_familiaris	1	4	1
Medium	F1PM98	Collagen type IV alpha 3 chain OS=Canis lupus familiaris OX=9615 GN=COL4A3 PE=4 SV=3	C_familiaris	1	1	1
Medium	A0A5F4C6X9	Importin 11 OS=Canis lupus familiaris OX=9615 GN=IPO11 PE=4 SV=1	C_familiaris	1	3	1
Medium	F1PZ57	Centrosomal protein 89 OS=Canis lupus familiaris OX=9615 GN=CEP89 PE=4 SV=3	C_familiaris	1	1	1
Medium	A0A5F4D9L6	Zinc finger C4H2-type containing OS=Canis lupus familiaris OX=9615 GN=ZC4H2 PE=4 SV=1	C_familiaris	1	2	1
Medium	A0A5F4DBV4	Retinol binding protein 2 OS=Canis lupus familiaris OX=9615 GN=RBP2 PE=3 SV=1	C_familiaris	1	4	1
Medium	F1P9F0	Leucine rich repeat containing G protein-coupled receptor 4 OS=Canis lupus familiaris OX=9615 GN=LGR4 PE=4 SV=3	C_familiaris	1	1	1
Medium	F1Q0C1	DOP1 leucine zipper like protein A OS=Canis lupus familiaris OX=9615 GN=DOP1A PE=3 SV=3	C_familiaris	1	1	1
Medium	A0A5F4CMZ1	Ig-like domain-containing protein OS=Canis lupus familiaris OX=9615 PE=4 SV=1	C_familiaris	1	1	1
Medium	A0A5F4C6E7	F-box and leucine rich repeat protein 13 OS=Canis lupus familiaris OX=9615 GN=FBXL13 PE=4 SV=1	C_familiaris	1	1	1
Medium	E2QU50	Fibrinogen C domain containing 1 OS=Canis lupus familiaris OX=9615 GN=FIBCD1 PE=4 SV=2	C_familiaris	1	1	1
Medium	E2R970	Ubiquitinyl hydrolase 1 OS=Canis lupus familiaris OX=9615 GN=USP24 PE=3 SV=3	C_familiaris	1	1	1
Medium	E2QYS7	Parkin coregulated like OS=Canis lupus familiaris OX=9615 GN=PACRGL PE=4 SV=3	C_familiaris	1	2	1
Medium	F1PZL0	Gasdermin A OS=Canis lupus familiaris OX=9615 GN=GSDMA PE=3 SV=3	C_familiaris	1	1	1
Medium	F6X725	ATP binding cassette subfamily E member 1 OS=Canis lupus familiaris OX=9615 GN=ABCE1 PE=4 SV=2	C_familiaris	1	1	1
Medium	A0A5F4BUH8	Ubiquitinyl hydrolase 1 OS=Canis lupus familiaris OX=9615 GN=USP9X PE=3 SV=1	C_familiaris	1	1	1
Medium	E2QW34	Proteasome subunit beta OS=Canis lupus familiaris OX=9615 GN=PSMB2 PE=3 SV=1	C_familiaris	1	1	1
Medium	F6XRA9	Receptor protein-tyrosine kinase OS=Canis lupus familiaris OX=9615 GN=MST1R PE=4 SV=2	C_familiaris	1	1	1
Medium	A0A5F4D0U7	Structural maintenance of chromosomes flexible hinge domain containing 1 OS=Canis lupus familiaris OX=9615 GN=SMCHD1 PE=4 SV=1	C_familiaris	1	2	1
Low	A0A5F4BX94	KAT8 regulatory NSL complex subunit 1 like OS=Canis lupus familiaris OX=9615 GN=KANSL1L PE=4 SV=1	C_familiaris	1	1	1
Low	J9P3Y2	RNA binding motif protein 44 OS=Canis lupus familiaris OX=9615 GN=RBM44 PE=4 SV=2	C_familiaris	1	1	1
Low	A0A5F4C2G4	Delta 4-desaturase, sphingolipid 2 OS=Canis lupus familiaris OX=9615 GN=DEGS2 PE=4 SV=1	C_familiaris	1	1	1
Low	F1PFQ0	Holliday junction recognition protein OS=Canis lupus familiaris OX=9615 GN=HJURP PE=4 SV=3	C_familiaris	1	1	1
Low	F1PDT3	Formin homology 2 domain containing 3 OS=Canis lupus familiaris OX=9615 GN=FHOD3 PE=4 SV=3	C_familiaris	1	2	1
Low	A0A5F4DIQ5	Helicase with zinc finger 2 OS=Canis lupus familiaris OX=9615 GN=HELZ2 PE=4 SV=1	C_familiaris	1	1	1
Low	F1PRR2	Histamine H1 receptor OS=Canis lupus familiaris OX=9615 GN=HRH1 PE=3 SV=3	C_familiaris	1	1	1
Low	A0A5F4CY99	WD repeat and FYVE domain containing 3 OS=Canis lupus familiaris OX=9615 GN=WDFY3 PE=4 SV=1	C_familiaris	1	1	1
High	A0A5F4CDQ5	Ig-like domain-containing protein OS=Canis lupus familiaris OX=9615 PE=4 SV=1	C_familiaris	7	216	0

## Sheet: 4
Protein FDR Confidence	Accession	Description	Marked as	Peptides	PSMs	Unique Peptides
High	E2R1P6	Spectrin alpha, erythrocytic 1 OS=Canis lupus familiaris OX=9615 GN=SPTA1 PE=3 SV=3	C_familiaris	127	575	127
High	F1P8Z5	Apolipoprotein B OS=Canis lupus familiaris OX=9615 GN=APOB PE=4 SV=2	C_familiaris	129	279	124
High	F1Q253	Spectrin beta chain OS=Canis lupus familiaris OX=9615 GN=SPTB PE=3 SV=3	C_familiaris	117	458	117
High	F1PWW0	Filamin A OS=Canis lupus familiaris OX=9615 GN=FLNA PE=3 SV=3	C_familiaris	105	369	105
High	F1PSC2	Talin 1 OS=Canis lupus familiaris OX=9615 GN=TLN1 PE=4 SV=3	C_familiaris	83	226	83
High	F1PGM1	C3-beta-c OS=Canis lupus familiaris OX=9615 GN=C3 PE=4 SV=2	C_familiaris	67	374	60
High	G1K2B9	von Willebrand factor OS=Canis lupus familiaris OX=9615 GN=VWF PE=4 SV=2	C_familiaris	59	236	59
High	J9PBN6	Uncharacterized protein OS=Canis lupus familiaris OX=9615 GN=LOC477699 PE=3 SV=1	C_familiaris	58	758	58
High	F6UME0	Uncharacterized protein OS=Canis lupus familiaris OX=9615 GN=LOC477699 PE=3 SV=1	C_familiaris	58	374	58
High	A0A5F4D5S2	C4a anaphylatoxin OS=Canis lupus familiaris OX=9615 PE=4 SV=1	C_familiaris	57	243	53
High	A0A5F4CWM9	Myosin-9 OS=Canis lupus familiaris OX=9615 GN=MYH9 PE=3 SV=1	C_familiaris	45	93	45
High	E2RLQ9	15S Mg(2+)-ATPase p97 subunit OS=Canis lupus familiaris OX=9615 GN=VCP PE=3 SV=3	C_familiaris	43	149	43
High	J9P430	Beta-1 metal-binding globulin OS=Canis lupus familiaris OX=9615 GN=TF PE=3 SV=1	C_familiaris	43	373	42
High	F1PKR3	Metavinculin OS=Canis lupus familiaris OX=9615 GN=VCL PE=3 SV=3	C_familiaris	39	87	39
High	F1PBL4	Fibrinogen alpha chain OS=Canis lupus familiaris OX=9615 GN=FGA PE=4 SV=2	C_familiaris	31	339	31
High	F1PHQ0	Clathrin heavy chain OS=Canis lupus familiaris OX=9615 GN=CLTC PE=3 SV=3	C_familiaris	31	58	31
High	F1PEN6	Transferrin receptor protein 1 OS=Canis lupus familiaris OX=9615 GN=TFRC PE=3 SV=2	C_familiaris	30	138	30
High	F1PBI6	Thrombospondin 1 OS=Canis lupus familiaris OX=9615 GN=THBS1 PE=3 SV=3	C_familiaris	30	95	29
High	E2RL88	Integrin subunit alpha 6 OS=Canis lupus familiaris OX=9615 GN=ITGA6 PE=3 SV=2	C_familiaris	29	70	29
High	F1P7J4	Complement C5 OS=Canis lupus familiaris OX=9615 GN=C5 PE=4 SV=3	C_familiaris	30	79	28
High	F1Q421	Plasminogen OS=Canis lupus familiaris OX=9615 GN=PLG PE=3 SV=2	C_familiaris	28	86	28
High	F1PRU9	Integrin subunit alpha 2b OS=Canis lupus familiaris OX=9615 GN=ITGA2B PE=3 SV=2	C_familiaris	27	99	27
High	F1PN98	Coagulation factor V OS=Canis lupus familiaris OX=9615 GN=F5 PE=3 SV=2	C_familiaris	40	101	27
High	F1Q455	PKHD1 like 1 OS=Canis lupus familiaris OX=9615 GN=PKHD1L1 PE=4 SV=3	C_familiaris	27	50	27
High	F1PGS2	Fibrinogen beta chain OS=Canis lupus familiaris OX=9615 GN=FGB PE=4 SV=2	C_familiaris	26	543	26
High	Q2Z1P8	Anion exchange protein OS=Canis lupus familiaris OX=9615 GN=SLC4A1 PE=2 SV=1	C_familiaris	26	350	26
High	E2QY07	Actinin alpha 1 OS=Canis lupus familiaris OX=9615 GN=ACTN1 PE=3 SV=1	C_familiaris	40	114	26
High	E2RK64	Fermitin family member 3 OS=Canis lupus familiaris OX=9615 GN=FERMT3 PE=3 SV=2	C_familiaris	26	78	26
High	H9GWY1	Inter-alpha-trypsin inhibitor heavy chain 4 OS=Canis lupus familiaris OX=9615 GN=ITIH4 PE=3 SV=3	C_familiaris	26	58	26
High	A0A5F4BYK6	Tenascin C OS=Canis lupus familiaris OX=9615 GN=TNC PE=3 SV=1	C_familiaris	26	33	26
High	F1PDJ5	Apolipoprotein A-I OS=Canis lupus familiaris OX=9615 GN=APOA1 PE=3 SV=1	C_familiaris	25	141	25
High	E2RK21	Uncharacterized protein OS=Canis lupus familiaris OX=9615 GN=CFH PE=4 SV=3	C_familiaris	25	64	25
High	F1PFG6	Programmed cell death 6 interacting protein OS=Canis lupus familiaris OX=9615 GN=PDCD6IP PE=4 SV=3	C_familiaris	25	57	25
High	A0A5F4BXN3	Actin-depolymerizing factor OS=Canis lupus familiaris OX=9615 GN=GSN PE=3 SV=1	C_familiaris	24	115	24
High	A0A5F4DEY2	Ceruloplasmin OS=Canis lupus familiaris OX=9615 GN=CP PE=3 SV=1	C_familiaris	23	69	23
High	Q28288	Syntaxin-binding protein 2 OS=Canis lupus familiaris OX=9615 GN=STXBP2 PE=2 SV=1	C_familiaris	23	43	23
High	A0A5F4CED8	Anaphylatoxin-like domain-containing protein OS=Canis lupus familiaris OX=9615 GN=LOC484960 PE=4 SV=1	C_familiaris	23	44	23
High	F1PPG5	Integrin beta OS=Canis lupus familiaris OX=9615 GN=ITGB3 PE=3 SV=2	C_familiaris	22	128	22
High	F1Q418	Inter-alpha-trypsin inhibitor heavy chain 1 OS=Canis lupus familiaris OX=9615 GN=ITIH1 PE=3 SV=2	C_familiaris	22	83	22
High	F1PGM9	Complement component 4 binding protein alpha OS=Canis lupus familiaris OX=9615 GN=C4BPA PE=4 SV=3	C_familiaris	22	208	22
High	F6XYK7	Adducin 2 OS=Canis lupus familiaris OX=9615 GN=ADD2 PE=3 SV=1	C_familiaris	23	52	22
High	E2RT60	Integrin beta OS=Canis lupus familiaris OX=9615 GN=ITGB1 PE=3 SV=3	C_familiaris	22	60	22
High	F1PCV3	Angiotensin-converting enzyme OS=Canis lupus familiaris OX=9615 GN=ACE PE=3 SV=3	C_familiaris	22	53	22
High	F1P8G0	Fibrinogen gamma chain OS=Canis lupus familiaris OX=9615 GN=FGG PE=4 SV=2	C_familiaris	21	362	21
High	A0A5F4BSQ8	Karyopherin subunit beta 1 OS=Canis lupus familiaris OX=9615 GN=KPNB1 PE=3 SV=1	C_familiaris	21	48	21
High	F1PD51	Erythrocyte membrane protein band 4.2 OS=Canis lupus familiaris OX=9615 GN=EPB42 PE=3 SV=3	C_familiaris	21	68	20
High	F1PAQ3	Maltase-glucoamylase OS=Canis lupus familiaris OX=9615 GN=MGAM PE=3 SV=3	C_familiaris	22	37	20
High	E2R0T6	Heat shock protein family A (Hsp70) member 8 OS=Canis lupus familiaris OX=9615 GN=HSPA8 PE=3 SV=1	C_familiaris	27	164	19
High	F1PG39	Inter-alpha-trypsin inhibitor heavy chain 2 OS=Canis lupus familiaris OX=9615 GN=ITIH2 PE=3 SV=3	C_familiaris	19	80	19
High	A0A5F4D4F1	Moesin OS=Canis lupus familiaris OX=9615 GN=MSN PE=4 SV=1	C_familiaris	25	81	19
High	E2RS75	C3/C5 convertase OS=Canis lupus familiaris OX=9615 GN=CFB PE=4 SV=2	C_familiaris	19	67	19
High	F1PNH6	Selenium binding protein 1 OS=Canis lupus familiaris OX=9615 GN=SELENBP1 PE=3 SV=3	C_familiaris	19	45	19
High	E2QUU5	60 kDa chaperonin OS=Canis lupus familiaris OX=9615 GN=HSPD1 PE=3 SV=2	C_familiaris	19	41	19
High	F1PSS8	Vitamin K-dependent protein S OS=Canis lupus familiaris OX=9615 GN=PROS1 PE=4 SV=3	C_familiaris	19	64	19
High	F6Y290	Leukotriene A(4) hydrolase OS=Canis lupus familiaris OX=9615 GN=LTA4H PE=3 SV=1	C_familiaris	19	32	19
High	F6UZV8	Calcium-activated neutral proteinase 1 OS=Canis lupus familiaris OX=9615 GN=CAPN1 PE=3 SV=2	C_familiaris	19	31	19
High	F1PKX3	Coagulation factor XIII A chain OS=Canis lupus familiaris OX=9615 GN=F13A1 PE=3 SV=2	C_familiaris	19	56	18
High	E2QZ50	Adenylyl cyclase-associated protein OS=Canis lupus familiaris OX=9615 GN=CAP1 PE=3 SV=1	C_familiaris	18	56	18
High	Q7YQC6	Heat shock 70 kDa protein 1 OS=Canis lupus familiaris OX=9615 GN=HSPA1 PE=2 SV=1	C_familiaris	20	63	18
High	E2QZQ1	Transferrin OS=Canis lupus familiaris OX=9615 GN=TF PE=3 SV=2	C_familiaris	18	46	18
High	A0A5F4BY85	Glycosyl-phosphatidylinositol-specific phospholipase D OS=Canis lupus familiaris OX=9615 GN=GPLD1 PE=3 SV=1	C_familiaris	18	54	18
High	F1P9U4	Dihydropyrimidinase-related protein 2 OS=Canis lupus familiaris OX=9615 GN=DPYSL2 PE=3 SV=2	C_familiaris	18	31	18
High	E2QWN7	Lymphocyte cytosolic protein 1 OS=Canis lupus familiaris OX=9615 GN=LCP1 PE=4 SV=2	C_familiaris	18	33	18
High	F1P8N6	Endoplasmin OS=Canis lupus familiaris OX=9615 GN=HSP90B1 PE=3 SV=1	C_familiaris	18	39	18
High	E2RD86	Protein disulfide-isomerase OS=Canis lupus familiaris OX=9615 GN=PDIA3 PE=3 SV=1	C_familiaris	18	31	18
High	F1P7V6	Stress induced phosphoprotein 1 OS=Canis lupus familiaris OX=9615 GN=STIP1 PE=4 SV=3	C_familiaris	18	37	18
High	E2QUY1	RAS p21 protein activator 3 OS=Canis lupus familiaris OX=9615 GN=RASA3 PE=4 SV=2	C_familiaris	18	29	18
High	A0A5F4CAZ7	Sodium/potassium-transporting ATPase subunit alpha OS=Canis lupus familiaris OX=9615 GN=ATP1A1 PE=3 SV=1	C_familiaris	17	32	17
High	F1P797	5-aminoimidazole-4-carboxamide ribonucleotide formyltransferase OS=Canis lupus familiaris OX=9615 GN=ATIC PE=3 SV=2	C_familiaris	17	23	17
High	P18649	Apolipoprotein E OS=Canis lupus familiaris OX=9615 GN=APOE PE=1 SV=3	C_familiaris	16	126	16
High	A0A5S6DEE6	Clusterin OS=Canis lupus familiaris OX=9615 GN=CLU PE=3 SV=1	C_familiaris	16	86	16
High	F1PIC7	78 kDa glucose-regulated protein OS=Canis lupus familiaris OX=9615 GN=HSPA5 PE=3 SV=2	C_familiaris	19	62	16
High	F1P903	Complement subcomponent C1r OS=Canis lupus familiaris OX=9615 GN=C1R PE=4 SV=2	C_familiaris	16	47	16
High	F1PRH1	ATP binding cassette subfamily B member 6 OS=Canis lupus familiaris OX=9615 GN=ABCB6 PE=4 SV=2	C_familiaris	16	36	16
High	E2RLN1	Serpin family D member 1 OS=Canis lupus familiaris OX=9615 GN=SERPIND1 PE=3 SV=2	C_familiaris	16	38	16
High	A0A5F4CWH9	Tripeptidyl-peptidase 2 OS=Canis lupus familiaris OX=9615 GN=TPP2 PE=4 SV=1	C_familiaris	16	24	16
High	E2RES2	Antithrombin-III OS=Canis lupus familiaris OX=9615 GN=SERPINC1 PE=3 SV=3	C_familiaris	23	93	15
High	J9NVC6	Immunoglobulin heavy constant mu OS=Canis lupus familiaris OX=9615 GN=IGHM PE=4 SV=2	C_familiaris	15	493	15
High	A0A5F4BUZ8	Transketolase OS=Canis lupus familiaris OX=9615 GN=TKT PE=4 SV=1	C_familiaris	15	34	15
High	J9NSF9	Activation peptide fragment 1 OS=Canis lupus familiaris OX=9615 GN=F2 PE=4 SV=2	C_familiaris	15	45	15
High	F6Y6T8	Uncharacterized protein OS=Canis lupus familiaris OX=9615 GN=PIGR PE=4 SV=2	C_familiaris	15	36	15
High	E2R5H4	Integrin-linked protein kinase OS=Canis lupus familiaris OX=9615 GN=ILK PE=4 SV=1	C_familiaris	15	44	15
High	A0A5S6CLE1	Catalase OS=Canis lupus familiaris OX=9615 GN=CAT PE=3 SV=1	C_familiaris	15	26	15
High	A0A5F4BUK5	Integrin subunit alpha 2 OS=Canis lupus familiaris OX=9615 GN=ITGA2 PE=3 SV=1	C_familiaris	15	23	15
High	F1PXX1	EH domain containing 3 OS=Canis lupus familiaris OX=9615 GN=EHD3 PE=4 SV=2	C_familiaris	29	97	14
High	F1Q317	Galectin OS=Canis lupus familiaris OX=9615 GN=LGALS9 PE=4 SV=1	C_familiaris	14	149	14
High	E2R7E8	Acyl-peptide hydrolase OS=Canis lupus familiaris OX=9615 GN=APEH PE=4 SV=2	C_familiaris	14	31	14
High	A4GT58	Cdc42 GTPase-activating protein OS=Canis lupus familiaris OX=9615 GN=ARHGAP1 PE=2 SV=1	C_familiaris	14	27	14
High	F1PRC5	Aamy domain-containing protein OS=Canis lupus familiaris OX=9615 GN=SLC3A2 PE=4 SV=2	C_familiaris	14	29	14
High	Q2TFN9	Heat shock 70 kDa protein 4 OS=Canis lupus familiaris OX=9615 GN=HSPA4 PE=1 SV=1	C_familiaris	14	21	14
High	F1PWQ0	Rab GDP dissociation inhibitor OS=Canis lupus familiaris OX=9615 GN=GDI1 PE=3 SV=2	C_familiaris	21	35	13
High	F1PG16	Uncharacterized protein OS=Canis lupus familiaris OX=9615 GN=CD5L PE=4 SV=2	C_familiaris	14	91	13
High	P54714	Triosephosphate isomerase OS=Canis lupus familiaris OX=9615 GN=TPI1 PE=1 SV=3	C_familiaris	13	33	13
High	Q28294	Guanine nucleotide-binding protein G(q) subunit alpha OS=Canis lupus familiaris OX=9615 GN=GNAQ PE=2 SV=2	C_familiaris	14	27	13
High	F1PVW0	L-lactate dehydrogenase OS=Canis lupus familiaris OX=9615 GN=LDHA PE=3 SV=2	C_familiaris	14	35	13
High	E2RMF9	Serpin family A member 5 OS=Canis lupus familiaris OX=9615 GN=SERPINA5 PE=3 SV=2	C_familiaris	13	30	13
High	F1P983	Protein-tyrosine-phosphatase OS=Canis lupus familiaris OX=9615 GN=PTPRJ PE=4 SV=2	C_familiaris	13	22	13
High	A0A5F4D0M8	Calpain 5 OS=Canis lupus familiaris OX=9615 GN=CAPN5 PE=3 SV=1	C_familiaris	13	26	13
High	F1Q3V2	ATP-citrate synthase OS=Canis lupus familiaris OX=9615 GN=ACLY PE=3 SV=3	C_familiaris	13	25	13
High	F1Q2F6	3-hydroxyacyl-[acyl-carrier-protein] dehydratase OS=Canis lupus familiaris OX=9615 GN=FASN PE=4 SV=3	C_familiaris	13	17	13
High	J9P315	LDL receptor related protein 1 OS=Canis lupus familiaris OX=9615 GN=LRP1 PE=3 SV=2	C_familiaris	13	16	13
High	E2RCC8	Uncharacterized protein OS=Canis lupus familiaris OX=9615 PE=4 SV=3	C_familiaris	15	281	12
High	P38400	Guanine nucleotide-binding protein G(i) subunit alpha-2 OS=Canis lupus familiaris OX=9615 GN=GNAI2 PE=2 SV=2	C_familiaris	17	51	12
High	E2RPW3	Paraoxonase 3 OS=Canis lupus familiaris OX=9615 GN=PON3 PE=3 SV=3	C_familiaris	12	43	12
High	A0A5F4D3V5	Tubulin beta 1 class VI OS=Canis lupus familiaris OX=9615 GN=TUBB1 PE=3 SV=1	C_familiaris	15	41	12
High	E2R4V3	Serpin family F member 2 OS=Canis lupus familiaris OX=9615 GN=SERPINF2 PE=3 SV=1	C_familiaris	12	39	12
High	P33703	Beta-2-glycoprotein 1 OS=Canis lupus familiaris OX=9615 GN=APOH PE=2 SV=1	C_familiaris	12	66	12
High	E2RSI6	FERM domain-containing protein OS=Canis lupus familiaris OX=9615 GN=EZR PE=4 SV=1	C_familiaris	18	47	12
High	F2Z4Q7	Serpin family F member 1 OS=Canis lupus familiaris OX=9615 GN=SERPINF1 PE=3 SV=1	C_familiaris	12	31	12
High	F1PDY8	Carbonic anhydrase OS=Canis lupus familiaris OX=9615 GN=CA2 PE=3 SV=3	C_familiaris	12	42	12
High	E2RFV9	Complement C9 OS=Canis lupus familiaris OX=9615 GN=C9 PE=3 SV=3	C_familiaris	12	30	12
High	J9P920	Ubiquitin-activating enzyme E1 OS=Canis lupus familiaris OX=9615 GN=UBA1 PE=3 SV=2	C_familiaris	12	20	12
High	A0A5F4BS96	Complement C1s OS=Canis lupus familiaris OX=9615 GN=C1S PE=4 SV=1	C_familiaris	12	26	12
High	Q28256	Platelet glycoprotein Ib alpha chain OS=Canis lupus familiaris OX=9615 GN=GP1BA PE=2 SV=2	C_familiaris	12	30	12
High	P19006	Haptoglobin OS=Canis lupus familiaris OX=9615 GN=HP PE=1 SV=2	C_familiaris	12	31	12
High	F1PBK6	Carbonic anhydrase OS=Canis lupus familiaris OX=9615 GN=CA1 PE=3 SV=2	C_familiaris	11	60	11
High	A0A5F4C8G1	Ras suppressor protein 1 OS=Canis lupus familiaris OX=9615 GN=RSU1 PE=4 SV=1	C_familiaris	11	48	11
High	F1PF02	Proteasome subunit beta OS=Canis lupus familiaris OX=9615 GN=PSMB1 PE=3 SV=3	C_familiaris	11	34	11
High	E2R3R2	Proteasome subunit beta OS=Canis lupus familiaris OX=9615 GN=PSMB5 PE=3 SV=1	C_familiaris	11	26	11
High	P18067	Ras-related protein Rab-7a OS=Canis lupus familiaris OX=9615 GN=RAB7A PE=1 SV=1	C_familiaris	11	26	11
High	A0A5F4D0H5	Tyrosine-protein kinase OS=Canis lupus familiaris OX=9615 GN=SRC PE=3 SV=1	C_familiaris	13	27	11
High	F1PZC6	Histidine rich glycoprotein OS=Canis lupus familiaris OX=9615 GN=HRG PE=4 SV=3	C_familiaris	11	34	11
High	E2R002	15-oxoprostaglandin 13-reductase OS=Canis lupus familiaris OX=9615 GN=PTGR1 PE=3 SV=2	C_familiaris	11	25	11
High	E2R516	Synaptosomal-associated protein OS=Canis lupus familiaris OX=9615 GN=SNAP23 PE=3 SV=1	C_familiaris	11	19	11
High	E2RRC9	Phosphoglycerate kinase OS=Canis lupus familiaris OX=9615 GN=PGK1 PE=3 SV=1	C_familiaris	11	23	11
High	E2QZN8	Pentraxin 3 OS=Canis lupus familiaris OX=9615 GN=PTX3 PE=4 SV=2	C_familiaris	11	27	11
High	A0A5F4C8J6	Ubiquitin carboxyl-terminal hydrolase OS=Canis lupus familiaris OX=9615 GN=USP14 PE=3 SV=1	C_familiaris	11	33	11
High	A0A5F4CW76	ATP synthase subunit beta OS=Canis lupus familiaris OX=9615 GN=ATP5F1B PE=3 SV=1	C_familiaris	11	20	11
High	F1PH87	Serpin family A member 3 OS=Canis lupus familiaris OX=9615 GN=SERPINA3 PE=3 SV=3	C_familiaris	11	27	11
High	F1PI01	Kell metallo-endopeptidase OS=Canis lupus familiaris OX=9615 GN=KEL PE=4 SV=3	C_familiaris	11	23	11
High	A0A5F4CN31	Glucose-6-phosphate isomerase OS=Canis lupus familiaris OX=9615 GN=GPI PE=3 SV=1	C_familiaris	11	25	11
High	F1PEK5	Septin-2 OS=Canis lupus familiaris OX=9615 GN=SEPTIN2 PE=3 SV=3	C_familiaris	11	18	11
High	F6XNH4	C-1-tetrahydrofolate synthase, cytoplasmic OS=Canis lupus familiaris OX=9615 GN=MTHFD1 PE=3 SV=2	C_familiaris	11	23	11
High	E2RJ26	Proteasome 26S subunit, non-ATPase 11 OS=Canis lupus familiaris OX=9615 GN=PSMD11 PE=3 SV=2	C_familiaris	11	20	11
High	F1PW10	Transforming growth factor-beta-induced protein ig-h3 OS=Canis lupus familiaris OX=9615 GN=TGFBI PE=4 SV=3	C_familiaris	11	17	11
High	F1PQS3	F-actin-capping protein subunit beta OS=Canis lupus familiaris OX=9615 GN=CAPZB PE=3 SV=2	C_familiaris	11	22	11
High	F1P8L7	Rab GDP dissociation inhibitor OS=Canis lupus familiaris OX=9615 GN=GDI2 PE=3 SV=1	C_familiaris	18	38	10
High	A0A5F4CHH4	Pleckstrin OS=Canis lupus familiaris OX=9615 GN=PLEK PE=4 SV=1	C_familiaris	10	28	10
High	E2QVU9	Biliverdin reductase B OS=Canis lupus familiaris OX=9615 GN=BLVRB PE=4 SV=1	C_familiaris	10	52	10
High	J9P7F7	Ficolin 1 OS=Canis lupus familiaris OX=9615 GN=FCN1 PE=3 SV=1	C_familiaris	10	56	10
High	A0A5F4DDG2	Myristoylated alanine rich protein kinase C substrate OS=Canis lupus familiaris OX=9615 GN=MARCKS PE=3 SV=1	C_familiaris	10	24	10
High	F1PLR6	Bridging integrator 1 OS=Canis lupus familiaris OX=9615 GN=BIN1 PE=3 SV=3	C_familiaris	11	29	10
High	E2RBB8	Tyrosine-protein kinase OS=Canis lupus familiaris OX=9615 GN=LYN PE=3 SV=3	C_familiaris	13	25	10
High	E2R5W6	Gc-globulin OS=Canis lupus familiaris OX=9615 GN=GC PE=4 SV=3	C_familiaris	10	25	10
High	F1PZR4	Amyloid beta precursor protein binding family B member 1 OS=Canis lupus familiaris OX=9615 GN=APBB1 PE=4 SV=3	C_familiaris	10	32	10
High	A0A5F4CZY7	Proteasome subunit alpha type OS=Canis lupus familiaris OX=9615 GN=PSMA1 PE=3 SV=1	C_familiaris	10	34	10
High	E2QSZ5	Coronin OS=Canis lupus familiaris OX=9615 GN=CORO1A PE=3 SV=1	C_familiaris	11	20	10
High	A0A5F4DBF8	V-type proton ATPase subunit a OS=Canis lupus familiaris OX=9615 GN=ATP6V0A1 PE=3 SV=1	C_familiaris	10	19	10
High	F1PR54	Uncharacterized protein OS=Canis lupus familiaris OX=9615 GN=LTF PE=3 SV=1	C_familiaris	11	20	10
High	F6V0D8	CCT-beta OS=Canis lupus familiaris OX=9615 GN=CCT2 PE=3 SV=2	C_familiaris	10	18	10
High	P63091	Guanine nucleotide-binding protein G(s) subunit alpha OS=Canis lupus familiaris OX=9615 GN=GNAS PE=2 SV=1	C_familiaris	11	21	10
High	F1PKV2	Coactivator-associated arginine methyltransferase 1 OS=Canis lupus familiaris OX=9615 GN=CARM1 PE=4 SV=3	C_familiaris	10	20	10
High	E2R7N5	Coronin OS=Canis lupus familiaris OX=9615 GN=CORO1B PE=3 SV=1	C_familiaris	10	19	10
High	F1P679	Actin-like protein 3 OS=Canis lupus familiaris OX=9615 GN=ACTR3 PE=3 SV=2	C_familiaris	10	13	10
High	A0A5F4C5K8	Membrane palmitoylated protein 2 OS=Canis lupus familiaris OX=9615 GN=MPP2 PE=3 SV=1	C_familiaris	10	15	10
High	A0A5F4C0A8	Coagulation factor XIII B chain OS=Canis lupus familiaris OX=9615 GN=F13B PE=4 SV=1	C_familiaris	10	16	10
High	Q28259	Glyceraldehyde-3-phosphate dehydrogenase OS=Canis lupus familiaris OX=9615 GN=GAPDH PE=2 SV=3	C_familiaris	13	44	9
High	J9P9J6	Uncharacterized protein OS=Canis lupus familiaris OX=9615 PE=4 SV=2	C_familiaris	9	96	9
High	F1PDQ2	Dematin actin binding protein OS=Canis lupus familiaris OX=9615 GN=DMTN PE=4 SV=3	C_familiaris	9	28	9
High	A0A5F4DGJ6	Parvin beta OS=Canis lupus familiaris OX=9615 GN=PARVB PE=3 SV=1	C_familiaris	9	29	9
High	E2QX17	Proteasome subunit beta OS=Canis lupus familiaris OX=9615 GN=PSMB3 PE=3 SV=1	C_familiaris	9	23	9
High	E2RMN2	Proteasome subunit alpha type OS=Canis lupus familiaris OX=9615 GN=PSMA6 PE=3 SV=1	C_familiaris	9	25	9
High	F1PQN5	Cofilin, non-muscle isoform OS=Canis lupus familiaris OX=9615 GN=CFL1 PE=3 SV=3	C_familiaris	9	31	9
High	F1PP29	Uncharacterized protein OS=Canis lupus familiaris OX=9615 PE=4 SV=2	C_familiaris	9	25	9
High	E2QSE3	Flotillin OS=Canis lupus familiaris OX=9615 GN=FLOT1 PE=3 SV=1	C_familiaris	9	17	9
High	F1PYX9	Serpin family G member 1 OS=Canis lupus familiaris OX=9615 GN=SERPING1 PE=3 SV=3	C_familiaris	9	24	9
High	P50551	Vasodilator-stimulated phosphoprotein OS=Canis lupus familiaris OX=9615 GN=VASP PE=1 SV=3	C_familiaris	9	21	9
High	A0A5F4C1F0	STEAP3 metalloreductase OS=Canis lupus familiaris OX=9615 GN=STEAP3 PE=3 SV=1	C_familiaris	9	16	9
High	E2RCP9	26S proteasome non-ATPase regulatory subunit 2 OS=Canis lupus familiaris OX=9615 GN=PSMD2 PE=3 SV=1	C_familiaris	9	19	9
High	F6X7V8	Erythroblast membrane associated protein OS=Canis lupus familiaris OX=9615 GN=ERMAP PE=3 SV=2	C_familiaris	9	16	9
High	E2RMT7	GMP reductase OS=Canis lupus familiaris OX=9615 GN=GMPR PE=3 SV=1	C_familiaris	9	21	9
High	E2RNG2	ATP synthase subunit alpha OS=Canis lupus familiaris OX=9615 GN=ATP5F1A PE=3 SV=2	C_familiaris	9	13	9
High	J9PAA4	Carboxypeptidase N subunit 2 OS=Canis lupus familiaris OX=9615 GN=CPN2 PE=4 SV=1	C_familiaris	9	17	9
High	F1PR87	Pleckstrin homology domain containing O2 OS=Canis lupus familiaris OX=9615 GN=PLEKHO2 PE=4 SV=2	C_familiaris	9	14	9
High	J9PBI1	LIM and senescent cell antigen-like-containing domain protein OS=Canis lupus familiaris OX=9615 GN=LIMS1 PE=4 SV=2	C_familiaris	9	17	9
High	F1PQ46	Anoctamin OS=Canis lupus familiaris OX=9615 GN=ANO6 PE=3 SV=3	C_familiaris	9	18	9
High	F1PZA0	Delta-aminolevulinic acid dehydratase OS=Canis lupus familiaris OX=9615 GN=ALAD PE=3 SV=2	C_familiaris	9	22	9
High	E2QW49	Proliferation-associated 2G4 OS=Canis lupus familiaris OX=9615 GN=PA2G4 PE=3 SV=1	C_familiaris	9	23	9
High	A0A5F4CPQ6	CCT-theta OS=Canis lupus familiaris OX=9615 GN=CCT8 PE=3 SV=1	C_familiaris	9	14	9
High	A0A5F4CTD0	Alpha-1-B glycoprotein OS=Canis lupus familiaris OX=9615 GN=A1BG PE=4 SV=1	C_familiaris	9	19	9
High	A0A5F4CP88	Protein-tyrosine-phosphatase OS=Canis lupus familiaris OX=9615 GN=PTPRC PE=4 SV=1	C_familiaris	9	15	9
High	E2RT65	Phosphoglycerate mutase OS=Canis lupus familiaris OX=9615 GN=PGAM1 PE=3 SV=2	C_familiaris	9	14	9
High	F1PPH7	26S proteasome AAA-ATPase subunit RPT1 OS=Canis lupus familiaris OX=9615 GN=PSMC2 PE=3 SV=2	C_familiaris	9	14	9
High	E2RG01	Complement C7 OS=Canis lupus familiaris OX=9615 GN=C7 PE=3 SV=3	C_familiaris	9	16	9
High	F1PBL1	14_3_3 domain-containing protein OS=Canis lupus familiaris OX=9615 GN=YWHAZ PE=3 SV=3	C_familiaris	11	26	8
High	E2RBR6	Proteasome subunit beta OS=Canis lupus familiaris OX=9615 GN=PSMB4 PE=3 SV=1	C_familiaris	8	27	8
High	A0A5F4CWA9	Proteasome subunit alpha type OS=Canis lupus familiaris OX=9615 GN=PSMA2 PE=3 SV=1	C_familiaris	8	24	8
High	F1P719	EH domain containing 4 OS=Canis lupus familiaris OX=9615 GN=EHD4 PE=4 SV=2	C_familiaris	13	28	8
High	A0A5F4CWL0	Galectin-3-binding protein OS=Canis lupus familiaris OX=9615 GN=CANT1 PE=4 SV=1	C_familiaris	8	20	8
High	E2R0K4	Ras-related protein Rab-14 OS=Canis lupus familiaris OX=9615 GN=RAB14 PE=3 SV=1	C_familiaris	9	27	8
High	A0A5F4C3T9	Phosphatidylcholine transfer protein OS=Canis lupus familiaris OX=9615 GN=PCTP PE=4 SV=1	C_familiaris	8	23	8
High	A0A5F4C1K4	2',3'-cyclic-nucleotide 3'-phosphodiesterase OS=Canis lupus familiaris OX=9615 GN=CNP PE=3 SV=1	C_familiaris	8	14	8
High	E2RPC6	Proteasome subunit beta OS=Canis lupus familiaris OX=9615 GN=PSMB7 PE=2 SV=3	C_familiaris	8	21	8
High	F1PCM9	Endophilin-B1 OS=Canis lupus familiaris OX=9615 GN=SH3GLB1 PE=4 SV=3	C_familiaris	8	22	8
High	A0A5F4CR91	Basigin OS=Canis lupus familiaris OX=9615 GN=BSG PE=4 SV=1	C_familiaris	8	21	8
High	E2RKR4	Proteasome subunit alpha type OS=Canis lupus familiaris OX=9615 GN=PSMA3 PE=3 SV=2	C_familiaris	8	20	8
High	E2R081	Serpin family B member 10 OS=Canis lupus familiaris OX=9615 GN=SERPINB10 PE=3 SV=1	C_familiaris	8	12	8
High	A0A5F4CBF2	Tropomyosin 4 OS=Canis lupus familiaris OX=9615 GN=TPM4 PE=3 SV=1	C_familiaris	13	26	8
High	E2R761	L-lactate dehydrogenase OS=Canis lupus familiaris OX=9615 GN=LDHB PE=3 SV=1	C_familiaris	9	24	8
High	A0A5F4CHN8	Thrombospondin 4 OS=Canis lupus familiaris OX=9615 GN=THBS4 PE=3 SV=1	C_familiaris	9	14	8
High	J9P6R1	Proteasome 26S subunit, non-ATPase 7 OS=Canis lupus familiaris OX=9615 GN=PSMD7 PE=3 SV=1	C_familiaris	8	18	8
High	F1PAG6	Arp2/3 complex 34 kDa subunit OS=Canis lupus familiaris OX=9615 GN=ARPC2 PE=3 SV=3	C_familiaris	8	13	8
High	J9P9T3	Adenylate kinase isoenzyme 1 OS=Canis lupus familiaris OX=9615 GN=AK1 PE=3 SV=1	C_familiaris	8	17	8
High	F1PBK7	AAA domain-containing protein OS=Canis lupus familiaris OX=9615 GN=PSMC3 PE=3 SV=2	C_familiaris	8	13	8
High	F1PNS6	Peptidase D OS=Canis lupus familiaris OX=9615 GN=PEPD PE=3 SV=3	C_familiaris	8	16	8
High	A0A5F4D2T1	Actin-related protein 2/3 complex subunit OS=Canis lupus familiaris OX=9615 GN=ARPC1B PE=3 SV=1	C_familiaris	8	17	8
High	A0A5F4C175	Platelet and endothelial cell adhesion molecule 1 OS=Canis lupus familiaris OX=9615 GN=PECAM1 PE=4 SV=1	C_familiaris	8	21	8
High	E2QXN8	Annexin OS=Canis lupus familiaris OX=9615 GN=ANXA11 PE=3 SV=2	C_familiaris	8	14	8
High	E2RB90	Heterogeneous nuclear ribonucleoprotein F OS=Canis lupus familiaris OX=9615 GN=HNRNPF PE=4 SV=1	C_familiaris	8	11	8
High	A0A5F4CZM1	Sulfhydryl oxidase OS=Canis lupus familiaris OX=9615 GN=QSOX1 PE=3 SV=1	C_familiaris	8	11	8
High	A0A5F4CZ17	Uncharacterized protein OS=Canis lupus familiaris OX=9615 GN=LOC609365 PE=4 SV=1	C_familiaris	8	21	8
High	F1P7S2	EH domain binding protein 1 like 1 OS=Canis lupus familiaris OX=9615 GN=EHBP1L1 PE=4 SV=3	C_familiaris	8	10	8
High	E2R2F7	Sex hormone binding globulin OS=Canis lupus familiaris OX=9615 GN=SHBG PE=4 SV=1	C_familiaris	8	16	8
High	Q8HZM5	Glutamine synthetase OS=Canis lupus familiaris OX=9615 GN=GLUL PE=1 SV=3	C_familiaris	8	11	8
High	F1PCE5	Serpin family A member 1 OS=Canis lupus familiaris OX=9615 GN=SERPINA1 PE=3 SV=3	C_familiaris	7	44	7
High	F1PKW7	Tyrosine 3-monooxygenase/tryptophan 5-monooxygenase activation protein beta OS=Canis lupus familiaris OX=9615 GN=YWHAB PE=3 SV=3	C_familiaris	10	26	7
High	E2RLS3	Heat shock protein 90 alpha family class B member 1 OS=Canis lupus familiaris OX=9615 GN=HSP90AB1 PE=3 SV=2	C_familiaris	12	35	7
High	F1PGY1	Heat shock protein 90 alpha family class A member 1 OS=Canis lupus familiaris OX=9615 GN=HSP90AA1 PE=3 SV=3	C_familiaris	11	27	7
High	E2RH18	Complement factor properdin OS=Canis lupus familiaris OX=9615 GN=CFP PE=4 SV=1	C_familiaris	7	26	7
High	F1P7P3	F-actin-capping protein subunit alpha OS=Canis lupus familiaris OX=9615 GN=CAPZA1 PE=3 SV=2	C_familiaris	9	25	7
High	P24406	Transforming protein RhoA OS=Canis lupus familiaris OX=9615 GN=RHOA PE=2 SV=1	C_familiaris	7	23	7
High	A0A5F4BPC8	Fetuin B OS=Canis lupus familiaris OX=9615 GN=FETUB PE=4 SV=1	C_familiaris	7	19	7
High	E2R141	Complement component 8 subunit beta OS=Canis lupus familiaris OX=9615 GN=C8B PE=3 SV=1	C_familiaris	7	17	7
High	A0A5F4BRR8	Stomatin OS=Canis lupus familiaris OX=9615 GN=STOM PE=3 SV=1	C_familiaris	7	18	7
High	J9P1G2	Adiponectin A OS=Canis lupus familiaris OX=9615 GN=C1QB PE=4 SV=1	C_familiaris	7	49	7
High	P05124	Creatine kinase B-type OS=Canis lupus familiaris OX=9615 GN=CKB PE=1 SV=1	C_familiaris	7	10	7
High	F1PXZ9	KRAS proto-oncogene, GTPase OS=Canis lupus familiaris OX=9615 GN=KRAS PE=4 SV=2	C_familiaris	7	13	7
High	A0A5F4DDK9	Purine nucleoside phosphorylase OS=Canis lupus familiaris OX=9615 GN=PNP PE=3 SV=1	C_familiaris	7	18	7
High	E2QXQ9	Tropomodulin 1 OS=Canis lupus familiaris OX=9615 GN=TMOD1 PE=4 SV=1	C_familiaris	7	11	7
High	F1PXD6	Proteoglycan 4 OS=Canis lupus familiaris OX=9615 GN=PRG4 PE=4 SV=3	C_familiaris	7	17	7
High	E2RT39	Maltase-glucoamylase 2 (putative) OS=Canis lupus familiaris OX=9615 GN=MGAM2 PE=3 SV=3	C_familiaris	9	12	7
High	A0A5F4C5P0	Disintegrin and metalloproteinase domain-containing protein 10 OS=Canis lupus familiaris OX=9615 GN=ADAM10 PE=4 SV=1	C_familiaris	7	14	7
High	A0A5F4C8R9	AAA domain-containing protein OS=Canis lupus familiaris OX=9615 GN=PSMC6 PE=3 SV=1	C_familiaris	7	14	7
High	E2RM61	Proteasome 26S subunit, ATPase 5 OS=Canis lupus familiaris OX=9615 GN=PSMC5 PE=3 SV=3	C_familiaris	8	13	7
High	F1PKR0	Uncharacterized protein OS=Canis lupus familiaris OX=9615 GN=SDCBP PE=4 SV=3	C_familiaris	7	17	7
High	F1Q1Q8	UTP--glucose-1-phosphate uridylyltransferase OS=Canis lupus familiaris OX=9615 GN=UGP2 PE=3 SV=3	C_familiaris	7	9	7
High	F1PKY3	Adenosine aminohydrolase OS=Canis lupus familiaris OX=9615 GN=ADA PE=3 SV=3	C_familiaris	7	16	7
High	A0A5F4C3L7	Milk fat globule-EGF factor 8 protein OS=Canis lupus familiaris OX=9615 GN=MFGE8 PE=4 SV=1	C_familiaris	7	15	7
High	P62825	GTP-binding nuclear protein Ran OS=Canis lupus familiaris OX=9615 GN=RAN PE=1 SV=3	C_familiaris	7	16	7
High	A0A5F4D8D4	Aspartyl aminopeptidase OS=Canis lupus familiaris OX=9615 GN=DNPEP PE=3 SV=1	C_familiaris	7	10	7
High	F1PQD3	Tubulin tyrosine ligase like 12 OS=Canis lupus familiaris OX=9615 GN=TTLL12 PE=4 SV=3	C_familiaris	7	11	7
High	E2R8A7	Collectin subfamily member 11 OS=Canis lupus familiaris OX=9615 GN=COLEC11 PE=4 SV=3	C_familiaris	7	13	7
High	A0A5F4BQT8	Integrin subunit alpha V OS=Canis lupus familiaris OX=9615 GN=ITGAV PE=3 SV=1	C_familiaris	7	10	7
High	E2R5Q1	Calponin OS=Canis lupus familiaris OX=9615 GN=CNN2 PE=3 SV=2	C_familiaris	7	12	7
High	E2R7L1	Protein disulfide-isomerase A4 OS=Canis lupus familiaris OX=9615 GN=PDIA4 PE=3 SV=2	C_familiaris	7	12	7
High	A0A5F4CW08	Dynamin GTPase OS=Canis lupus familiaris OX=9615 GN=DNM2 PE=3 SV=1	C_familiaris	7	9	7
High	E2QYG6	H(+)-transporting two-sector ATPase OS=Canis lupus familiaris OX=9615 GN=ATP6V1A PE=3 SV=1	C_familiaris	7	11	7
High	E2RJY0	Potassium channel tetramerization domain containing 12 OS=Canis lupus familiaris OX=9615 GN=KCTD12 PE=4 SV=2	C_familiaris	7	13	7
High	E2R109	Complement C8 alpha chain OS=Canis lupus familiaris OX=9615 GN=C8A PE=3 SV=1	C_familiaris	7	12	7
High	E2QUL3	Acyl-CoA synthetase long chain family member 1 OS=Canis lupus familiaris OX=9615 GN=ACSL1 PE=4 SV=2	C_familiaris	7	10	7
High	A0A5F4DAC6	Neuropilin 1 OS=Canis lupus familiaris OX=9615 GN=NRP1 PE=3 SV=1	C_familiaris	7	10	7
High	A0A5F4C080	Caldesmon 1 OS=Canis lupus familiaris OX=9615 GN=CALD1 PE=4 SV=1	C_familiaris	7	10	7
High	E2RS79	C3/C5 convertase OS=Canis lupus familiaris OX=9615 GN=C2 PE=4 SV=2	C_familiaris	7	11	7
High	F1PSK6	EH domain containing 1 OS=Canis lupus familiaris OX=9615 GN=EHD1 PE=4 SV=3	C_familiaris	18	48	6
High	P62872	Guanine nucleotide-binding protein G(I)/G(S)/G(T) subunit beta-1 OS=Canis lupus familiaris OX=9615 GN=GNB1 PE=2 SV=3	C_familiaris	11	50	6
High	E2QX84	Heat shock protein family A (Hsp70) member 2 OS=Canis lupus familiaris OX=9615 GN=HSPA2 PE=3 SV=1	C_familiaris	14	50	6
High	E2RE76	Apolipoprotein A-IV OS=Canis lupus familiaris OX=9615 GN=APOA4 PE=3 SV=2	C_familiaris	17	41	6
High	F1PNY2	Immunoglobulin kappa constant OS=Canis lupus familiaris OX=9615 GN=IGKC PE=4 SV=3	C_familiaris	6	114	6
High	J9NX46	Clathrin light chain A OS=Canis lupus familiaris OX=9615 GN=CLTA PE=4 SV=1	C_familiaris	6	21	6
High	J9P6N4	Tyrosine 3-monooxygenase/tryptophan 5-monooxygenase activation protein eta OS=Canis lupus familiaris OX=9615 GN=YWHAH PE=3 SV=1	C_familiaris	8	13	6
High	J9NUI6	Alpha-1-microglobulin OS=Canis lupus familiaris OX=9615 GN=AMBP PE=3 SV=1	C_familiaris	6	22	6
High	J9JHH5	Joining chain of multimeric IgA and IgM OS=Canis lupus familiaris OX=9615 GN=JCHAIN PE=4 SV=1	C_familiaris	6	67	6
High	J9P028	Glutathione peroxidase OS=Canis lupus familiaris OX=9615 GN=GPX3 PE=3 SV=2	C_familiaris	6	15	6
High	F1PK62	Peptidyl-prolyl cis-trans isomerase OS=Canis lupus familiaris OX=9615 PE=3 SV=2	C_familiaris	6	22	6
High	H9GWG4	Inter-alpha-trypsin inhibitor heavy chain 3 OS=Canis lupus familiaris OX=9615 GN=ITIH3 PE=3 SV=3	C_familiaris	7	11	6
High	F1PQ40	Proteasome 26S subunit, ATPase 1 OS=Canis lupus familiaris OX=9615 GN=PSMC1 PE=3 SV=2	C_familiaris	7	12	6
High	E2RT32	Syntaxin 12 OS=Canis lupus familiaris OX=9615 GN=STX12 PE=3 SV=2	C_familiaris	6	10	6
High	E2RNG3	Carboxypeptidase N subunit 1 OS=Canis lupus familiaris OX=9615 GN=CPN1 PE=3 SV=2	C_familiaris	6	14	6
High	F1P9H3	AP3A hydrolase OS=Canis lupus familiaris OX=9615 GN=ENPP4 PE=3 SV=2	C_familiaris	6	14	6
High	A0A5F4BZC7	Twinfilin actin binding protein 2 OS=Canis lupus familiaris OX=9615 GN=TWF2 PE=3 SV=1	C_familiaris	6	12	6
High	F1P8T1	Angiopoietin like 6 OS=Canis lupus familiaris OX=9615 GN=ANGPTL6 PE=4 SV=3	C_familiaris	6	12	6
High	A0A5F4D1L1	Solute carrier family 44 member 1 OS=Canis lupus familiaris OX=9615 GN=SLC44A1 PE=3 SV=1	C_familiaris	6	12	6
High	F1Q3I5	Collagen alpha-1(I) chain OS=Canis lupus familiaris OX=9615 GN=COL1A1 PE=4 SV=3	C_familiaris	6	15	6
High	P60952	Cell division control protein 42 homolog OS=Canis lupus familiaris OX=9615 GN=CDC42 PE=2 SV=2	C_familiaris	6	10	6
High	E2RDX2	Charged multivesicular body protein 4B OS=Canis lupus familiaris OX=9615 GN=CHMP4B PE=3 SV=1	C_familiaris	6	13	6
High	E2RRA1	Protein kinase cAMP-dependent type II regulatory subunit beta OS=Canis lupus familiaris OX=9615 GN=PRKAR2B PE=3 SV=1	C_familiaris	6	8	6
High	F1PAG5	Vesicle amine transport 1 OS=Canis lupus familiaris OX=9615 GN=VAT1 PE=4 SV=3	C_familiaris	6	14	6
High	Q1HE58	Ras-related protein Rab-27A OS=Canis lupus familiaris OX=9615 GN=RAB27A PE=2 SV=1	C_familiaris	6	18	6
High	E2QV08	Malate dehydrogenase OS=Canis lupus familiaris OX=9615 GN=MDH1 PE=3 SV=3	C_familiaris	6	15	6
High	F1PRW7	Transportin 2 OS=Canis lupus familiaris OX=9615 GN=TNPO2 PE=4 SV=2	C_familiaris	7	10	6
High	F6UYJ9	Calreticulin OS=Canis lupus familiaris OX=9615 GN=CALR PE=3 SV=2	C_familiaris	6	10	6
High	E2RTD6	Hydroxymethylbilane synthase OS=Canis lupus familiaris OX=9615 GN=HMBS PE=3 SV=2	C_familiaris	6	12	6
High	F1P6Z3	Vesicle-fusing ATPase OS=Canis lupus familiaris OX=9615 GN=NSF PE=3 SV=2	C_familiaris	6	9	6
High	A0A5F4D3V6	Integrin beta OS=Canis lupus familiaris OX=9615 GN=ITGB2 PE=3 SV=1	C_familiaris	6	14	6
High	E2R8W7	Calcium binding protein 39 OS=Canis lupus familiaris OX=9615 GN=CAB39 PE=3 SV=1	C_familiaris	7	14	6
High	A0A5F4CJG8	Protein kinase C and casein kinase substrate in neurons 2 OS=Canis lupus familiaris OX=9615 GN=PACSIN2 PE=3 SV=1	C_familiaris	6	15	6
High	F1P624	Cullin associated and neddylation dissociated 1 OS=Canis lupus familiaris OX=9615 GN=CAND1 PE=3 SV=2	C_familiaris	6	7	6
High	A0A5K1UDZ7	Solute carrier family 12 member 4 OS=Canis lupus familiaris OX=9615 GN=SLC12A4 PE=3 SV=1	C_familiaris	6	6	6
High	J9P7P2	Uncharacterized protein OS=Canis lupus familiaris OX=9615 GN=LOC610164 PE=3 SV=2	C_familiaris	6	6	6
High	A0A5F4CVK3	PNP_UDP_1 domain-containing protein OS=Canis lupus familiaris OX=9615 PE=3 SV=1	C_familiaris	6	12	6
High	F1PKS1	ATP-dependent 6-phosphofructokinase OS=Canis lupus familiaris OX=9615 GN=PFKP PE=3 SV=3	C_familiaris	6	9	6
High	F1PTI2	Uncharacterized protein OS=Canis lupus familiaris OX=9615 GN=BTNL10 PE=3 SV=3	C_familiaris	6	9	6
High	F1P9P5	Ubiquitin carboxyl-terminal hydrolase OS=Canis lupus familiaris OX=9615 GN=USP5 PE=3 SV=3	C_familiaris	6	8	6
High	E2R413	Macrophage-capping protein OS=Canis lupus familiaris OX=9615 GN=CAPG PE=3 SV=3	C_familiaris	6	10	6
High	E2RGP6	Tumor susceptibility 101 OS=Canis lupus familiaris OX=9615 GN=TSG101 PE=3 SV=2	C_familiaris	6	8	6
High	A0A5F4DI79	Myosin IC OS=Canis lupus familiaris OX=9615 GN=MYO1C PE=3 SV=1	C_familiaris	6	10	6
High	E2QYX1	Phosphoglycerate mutase OS=Canis lupus familiaris OX=9615 GN=BPGM PE=3 SV=1	C_familiaris	6	15	6
High	E2RII4	EMAP like 2 OS=Canis lupus familiaris OX=9615 GN=EML2 PE=3 SV=3	C_familiaris	6	7	6
High	A0A5F4BYG4	Spectrin alpha, non-erythrocytic 1 OS=Canis lupus familiaris OX=9615 GN=SPTAN1 PE=3 SV=1	C_familiaris	6	9	6
High	F1PJE7	P-type Cu(+) transporter OS=Canis lupus familiaris OX=9615 GN=ATP7B PE=3 SV=3	C_familiaris	6	9	6
High	E2R574	Elongation factor 1-gamma OS=Canis lupus familiaris OX=9615 GN=EEF1G PE=4 SV=1	C_familiaris	6	10	6
High	A0A5F4D182	Serine hydroxymethyltransferase OS=Canis lupus familiaris OX=9615 GN=SHMT1 PE=3 SV=1	C_familiaris	6	8	6
High	F1PEU6	Hemicentin 2 OS=Canis lupus familiaris OX=9615 GN=HMCN2 PE=4 SV=3	C_familiaris	6	7	6
High	A0A5F4CNZ1	Complement component C6 OS=Canis lupus familiaris OX=9615 GN=C6 PE=3 SV=1	C_familiaris	6	9	6
High	J9P9E9	Glucose-6-phosphate 1-dehydrogenase OS=Canis lupus familiaris OX=9615 GN=G6PD PE=3 SV=2	C_familiaris	6	6	6
High	A0A5F4CZ37	Monocarboxylate transporter 2 OS=Canis lupus familiaris OX=9615 GN=SLC16A7 PE=3 SV=1	C_familiaris	6	12	6
High	A0A5F4C3X9	Actinin alpha 4 OS=Canis lupus familiaris OX=9615 GN=ACTN4 PE=3 SV=1	C_familiaris	29	68	5
High	P51147	Ras-related protein Rab-5C OS=Canis lupus familiaris OX=9615 GN=RAB5C PE=2 SV=1	C_familiaris	8	23	5
High	A0A5F4D0L8	Septin 6 OS=Canis lupus familiaris OX=9615 GN=SEPTIN6 PE=3 SV=1	C_familiaris	10	20	5
High	F1PUB5	Proteasome subunit alpha 7 OS=Canis lupus familiaris OX=9615 GN=PSMA7 PE=3 SV=3	C_familiaris	8	22	5
High	E2RJC2	Complement C1q C chain OS=Canis lupus familiaris OX=9615 GN=C1QC PE=4 SV=2	C_familiaris	5	29	5
High	A0A5F4C7X1	Complement factor I OS=Canis lupus familiaris OX=9615 GN=CFI PE=4 SV=1	C_familiaris	5	14	5
High	A0A5F4D9M4	Uncharacterized protein OS=Canis lupus familiaris OX=9615 GN=ARF3 PE=3 SV=1	C_familiaris	7	13	5
High	F1PCG4	Peroxiredoxin 2 OS=Canis lupus familiaris OX=9615 GN=PRDX2 PE=3 SV=2	C_familiaris	6	22	5
High	A0A0B4J198	Adiponectin D OS=Canis lupus familiaris OX=9615 GN=EIF4A2 PE=4 SV=2	C_familiaris	5	31	5
High	A0A5F4C7K2	Uncharacterized protein OS=Canis lupus familiaris OX=9615 GN=VTN PE=4 SV=1	C_familiaris	5	18	5
High	A0A5F4CC82	ADP ribosylation factor 4 OS=Canis lupus familiaris OX=9615 GN=ARF4 PE=3 SV=1	C_familiaris	7	13	5
High	E2R115	CD226 molecule OS=Canis lupus familiaris OX=9615 GN=CD226 PE=4 SV=2	C_familiaris	5	13	5
High	F1PTZ5	CD44 antigen OS=Canis lupus familiaris OX=9615 GN=CD44 PE=4 SV=3	C_familiaris	5	21	5
High	E2RMC1	ST13 Hsp70 interacting protein OS=Canis lupus familiaris OX=9615 GN=ST13 PE=3 SV=3	C_familiaris	5	12	5
High	E2QWR0	Surfactant protein D OS=Canis lupus familiaris OX=9615 GN=SFTPD PE=3 SV=1	C_familiaris	5	14	5
High	E2R1N1	Ubiquitin thioesterase OTU1 OS=Canis lupus familiaris OX=9615 GN=YOD1 PE=4 SV=1	C_familiaris	5	12	5
High	E2R5U8	Transthyretin OS=Canis lupus familiaris OX=9615 GN=TTR PE=3 SV=1	C_familiaris	5	12	5
High	A0A5F4BSW0	Voltage-dependent anion-selective channel protein 3 OS=Canis lupus familiaris OX=9615 PE=3 SV=1	C_familiaris	6	16	5
High	F1PZL7	Transportin 1 OS=Canis lupus familiaris OX=9615 GN=TNPO1 PE=4 SV=3	C_familiaris	6	10	5
High	F1Q1Q0	Coronin OS=Canis lupus familiaris OX=9615 GN=CORO1C PE=3 SV=3	C_familiaris	6	10	5
High	F1PE09	6-phosphogluconate dehydrogenase, decarboxylating OS=Canis lupus familiaris OX=9615 GN=PGD PE=3 SV=3	C_familiaris	5	8	5
High	A0A5F4DAX4	Vesicle-fusing ATPase OS=Canis lupus familiaris OX=9615 GN=VPS4A PE=3 SV=1	C_familiaris	7	13	5
High	F1Q067	Septin-7 OS=Canis lupus familiaris OX=9615 GN=SEPTIN7 PE=3 SV=3	C_familiaris	6	14	5
High	E2R9D7	DnaJ heat shock protein family (Hsp40) member B1 OS=Canis lupus familiaris OX=9615 GN=DNAJB1 PE=4 SV=1	C_familiaris	5	8	5
High	E2QXY7	Actin related protein 2 OS=Canis lupus familiaris OX=9615 GN=ACTR2 PE=3 SV=3	C_familiaris	5	10	5
High	H9GW87	Transaldolase OS=Canis lupus familiaris OX=9615 GN=LOC475937 PE=3 SV=1	C_familiaris	5	11	5
High	J9P7Y9	Uncharacterized protein OS=Canis lupus familiaris OX=9615 PE=4 SV=2	C_familiaris	6	10	5
High	E2RTE8	6-pyruvoyl tetrahydrobiopterin synthase OS=Canis lupus familiaris OX=9615 GN=PTS PE=3 SV=1	C_familiaris	5	14	5
High	F1PRW0	26S proteasome non-ATPase regulatory subunit 4 OS=Canis lupus familiaris OX=9615 GN=PSMD4 PE=3 SV=2	C_familiaris	5	9	5
High	E2RLK6	Adiponectin F1 OS=Canis lupus familiaris OX=9615 GN=LOC609026 PE=4 SV=1	C_familiaris	5	9	5
High	E2RGG9	T1-TrpRS OS=Canis lupus familiaris OX=9615 GN=WARS1 PE=3 SV=2	C_familiaris	5	8	5
High	A0A5F4D6P2	Vesicle associated membrane protein 7 OS=Canis lupus familiaris OX=9615 GN=VAMP7 PE=3 SV=1	C_familiaris	5	9	5
High	E2QXS7	Adenosylhomocysteinase OS=Canis lupus familiaris OX=9615 GN=AHCY PE=3 SV=3	C_familiaris	5	9	5
High	J9P983	Exostosin like glycosyltransferase 2 OS=Canis lupus familiaris OX=9615 GN=EXTL2 PE=4 SV=2	C_familiaris	5	12	5
High	A0A5F4CED7	Plasma retinol-binding protein OS=Canis lupus familiaris OX=9615 GN=RBP4 PE=3 SV=1	C_familiaris	5	8	5
High	F1P996	G protein pathway suppressor 1 OS=Canis lupus familiaris OX=9615 GN=GPS1 PE=3 SV=3	C_familiaris	5	9	5
High	F1P699	Phosphatidylethanolamine-binding protein 1 OS=Canis lupus familiaris OX=9615 GN=PEBP1 PE=3 SV=3	C_familiaris	5	9	5
High	E2R1N7	Prenylcysteine oxidase 1 OS=Canis lupus familiaris OX=9615 GN=PCYOX1 PE=3 SV=1	C_familiaris	5	6	5
High	F1PQ85	Mannan binding lectin serine peptidase 1 OS=Canis lupus familiaris OX=9615 GN=MASP1 PE=4 SV=3	C_familiaris	5	7	5
High	E2RH48	26S proteasome AAA-ATPase subunit RPT3 OS=Canis lupus familiaris OX=9615 GN=PSMC4 PE=3 SV=1	C_familiaris	5	7	5
High	J9NTL5	Glycoprotein Ib platelet subunit beta OS=Canis lupus familiaris OX=9615 GN=GP1BB PE=4 SV=2	C_familiaris	5	12	5
High	E2QT37	Nucleoporin 50 OS=Canis lupus familiaris OX=9615 GN=NUP50 PE=4 SV=2	C_familiaris	5	10	5
High	A0A5F4CSG8	Chaperonin containing TCP1 subunit 5 OS=Canis lupus familiaris OX=9615 GN=CCT5 PE=3 SV=1	C_familiaris	5	7	5
High	A0A5F4BXP7	Alpha-1,4 glucan phosphorylase OS=Canis lupus familiaris OX=9615 GN=PYGB PE=3 SV=1	C_familiaris	5	9	5
High	A0A5F4DH03	Coagulation factor X OS=Canis lupus familiaris OX=9615 GN=F10 PE=4 SV=1	C_familiaris	5	5	5
High	A0A5F4D6V1	Carboxypeptidase B2 OS=Canis lupus familiaris OX=9615 GN=CPB2 PE=3 SV=1	C_familiaris	5	8	5
High	F1P914	Major vault protein OS=Canis lupus familiaris OX=9615 GN=MVP PE=4 SV=3	C_familiaris	5	8	5
High	A0A5F4BTP4	AP complex subunit beta OS=Canis lupus familiaris OX=9615 GN=AP1B1 PE=3 SV=1	C_familiaris	5	6	5
High	F1Q1S9	TBC1 domain family member 24 OS=Canis lupus familiaris OX=9615 GN=TBC1D24 PE=4 SV=2	C_familiaris	5	6	5
High	Q8MKI5	Caspase-3 OS=Canis lupus familiaris OX=9615 GN=CASP3 PE=2 SV=1	C_familiaris	5	7	5
High	L7N0I7	Tubulin beta chain OS=Canis lupus familiaris OX=9615 GN=TUBB4B PE=3 SV=1	C_familiaris	17	45	4
High	E2RD95	G protein subunit beta 2 OS=Canis lupus familiaris OX=9615 GN=GNB2 PE=3 SV=1	C_familiaris	11	39	4
High	A0A5S6CZL3	Apolipoprotein A-IV OS=Canis lupus familiaris OX=9615 GN=APOA4 PE=3 SV=1	C_familiaris	15	38	4
High	A0A5F4C4W3	2-phospho-D-glycerate hydro-lyase OS=Canis lupus familiaris OX=9615 PE=3 SV=1	C_familiaris	9	21	4
High	E2QUV3	Alpha-2-HS-glycoprotein OS=Canis lupus familiaris OX=9615 GN=AHSG PE=4 SV=2	C_familiaris	4	16	4
High	F1PVP9	RAB1B, member RAS oncogene family OS=Canis lupus familiaris OX=9615 GN=RAB1B PE=4 SV=3	C_familiaris	9	39	4
High	A0A5F4D721	Tropomyosin 3 OS=Canis lupus familiaris OX=9615 GN=TPM3 PE=3 SV=1	C_familiaris	10	21	4
High	P61007	Ras-related protein Rab-8A OS=Canis lupus familiaris OX=9615 GN=RAB8A PE=1 SV=1	C_familiaris	6	31	4
High	Q50KA9	Nucleoside diphosphate kinase A OS=Canis lupus familiaris OX=9615 GN=NME1 PE=2 SV=1	C_familiaris	6	10	4
High	E2RC20	Nucleoside diphosphate kinase OS=Canis lupus familiaris OX=9615 GN=NME2 PE=3 SV=3	C_familiaris	6	14	4
High	A0A5F4DJ85	Rho GDP dissociation inhibitor alpha OS=Canis lupus familiaris OX=9615 GN=ARHGDIA PE=3 SV=1	C_familiaris	4	8	4
High	A0A5F4CVZ5	Ras-related C3 botulinum toxin substrate 1 OS=Canis lupus familiaris OX=9615 GN=RAC1 PE=4 SV=1	C_familiaris	6	18	4
High	J9P064	Collectin subfamily member 10 OS=Canis lupus familiaris OX=9615 GN=COLEC10 PE=4 SV=1	C_familiaris	4	17	4
High	J9P9V8	Tetraspanin OS=Canis lupus familiaris OX=9615 GN=CD82 PE=3 SV=2	C_familiaris	4	16	4
High	A0A5F4C0D1	Complement C1q subcomponent subunit A OS=Canis lupus familiaris OX=9615 GN=C1QA PE=4 SV=1	C_familiaris	4	9	4
High	E2QWP1	BRO1 domain- and CAAX motif-containing protein OS=Canis lupus familiaris OX=9615 GN=BROX PE=3 SV=1	C_familiaris	4	7	4
High	J9NWG4	C-type lectin domain-containing protein OS=Canis lupus familiaris OX=9615 GN=MBL2 PE=4 SV=2	C_familiaris	4	12	4
High	Q3BCQ5	Ammonium transporter Rh type A OS=Canis lupus familiaris OX=9615 GN=RHAG PE=2 SV=1	C_familiaris	4	15	4
High	J9NWC3	MYC target 1 OS=Canis lupus familiaris OX=9615 GN=MYCT1 PE=4 SV=2	C_familiaris	4	6	4
High	A0A5F4CRP0	Uncharacterized protein OS=Canis lupus familiaris OX=9615 GN=CHMP5 PE=3 SV=1	C_familiaris	4	12	4
High	J9P346	SCY domain-containing protein OS=Canis lupus familiaris OX=9615 GN=PPBP PE=3 SV=1	C_familiaris	4	9	4
High	E2RLL6	Chaperonin containing TCP1 subunit 6A OS=Canis lupus familiaris OX=9615 GN=CCT6A PE=3 SV=3	C_familiaris	6	10	4
High	G1K288	Ras-related protein Rab-2A OS=Canis lupus familiaris OX=9615 GN=RAB2A PE=4 SV=2	C_familiaris	4	7	4
High	J9NYN2	Cysteine and glycine rich protein 1 OS=Canis lupus familiaris OX=9615 GN=CSRP1 PE=4 SV=1	C_familiaris	4	8	4
High	F1Q094	Platelet-activating factor acetylhydrolase OS=Canis lupus familiaris OX=9615 GN=PLA2G7 PE=4 SV=1	C_familiaris	4	7	4
High	Q3BCQ6	Rh antigen-like protein OS=Canis lupus familiaris OX=9615 GN=Rh30 PE=2 SV=1	C_familiaris	4	13	4
High	A0A5S6DDK1	Ferritin OS=Canis lupus familiaris OX=9615 GN=FTH1 PE=3 SV=1	C_familiaris	4	9	4
High	F1PEJ5	Tetraspanin OS=Canis lupus familiaris OX=9615 GN=TSPAN33 PE=3 SV=3	C_familiaris	4	8	4
High	A0A5F4D061	Solute carrier family 2, facilitated glucose transporter member 3 OS=Canis lupus familiaris OX=9615 GN=SLC2A3 PE=3 SV=1	C_familiaris	4	9	4
High	A0A5F4BQK3	Lysosomal associated membrane protein 2 OS=Canis lupus familiaris OX=9615 GN=LAMP2 PE=3 SV=1	C_familiaris	4	9	4
High	F1P6D7	Integrin-associated protein OS=Canis lupus familiaris OX=9615 GN=CD47 PE=4 SV=3	C_familiaris	4	12	4
High	P55745	Ras-related protein Rab-21 OS=Canis lupus familiaris OX=9615 GN=RAB21 PE=3 SV=3	C_familiaris	4	6	4
High	J9P8J3	Heterogeneous nuclear ribonucleoprotein K OS=Canis lupus familiaris OX=9615 GN=HNRNPK PE=4 SV=2	C_familiaris	4	6	4
High	E2RPE3	IST1 homolog OS=Canis lupus familiaris OX=9615 GN=IST1 PE=3 SV=1	C_familiaris	4	7	4
High	F1PDG4	Uncharacterized protein OS=Canis lupus familiaris OX=9615 GN=UBB PE=4 SV=2	C_familiaris	4	12	4
High	A0A5F4BP23	Proteasome 26S subunit, non-ATPase 12 OS=Canis lupus familiaris OX=9615 GN=PSMD12 PE=3 SV=1	C_familiaris	4	7	4
High	F1PAB0	Uncharacterized protein OS=Canis lupus familiaris OX=9615 GN=LOC489647 PE=4 SV=3	C_familiaris	4	7	4
High	E2QYZ2	5'-nucleotidase OS=Canis lupus familiaris OX=9615 GN=NT5C3A PE=3 SV=1	C_familiaris	4	7	4
High	E2REF3	Solute carrier family 14 member 1 OS=Canis lupus familiaris OX=9615 GN=SLC14A1 PE=3 SV=3	C_familiaris	5	13	4
High	E2RQF8	Extracellular matrix protein 1 OS=Canis lupus familiaris OX=9615 GN=ECM1 PE=4 SV=3	C_familiaris	4	7	4
High	F6Y713	Alpha-1-acid glycoprotein OS=Canis lupus familiaris OX=9615 GN=LOC100685620 PE=3 SV=1	C_familiaris	4	10	4
High	A0A5F4D8T6	AIR carboxylase OS=Canis lupus familiaris OX=9615 GN=PAICS PE=3 SV=1	C_familiaris	4	7	4
High	A0A5F4C3J9	COP9 signalosome complex subunit 2 OS=Canis lupus familiaris OX=9615 GN=COPS2 PE=3 SV=1	C_familiaris	4	6	4
High	E2RB79	T-complex protein 1 subunit gamma OS=Canis lupus familiaris OX=9615 GN=CCT3 PE=3 SV=3	C_familiaris	4	5	4
High	F1PXG0	Sorbitol dehydrogenase OS=Canis lupus familiaris OX=9615 GN=SORD PE=3 SV=2	C_familiaris	4	6	4
High	E2QUL2	Vesicle associated membrane protein 8 OS=Canis lupus familiaris OX=9615 GN=VAMP8 PE=4 SV=3	C_familiaris	4	11	4
High	F1PWT3	Deoxyribonuclease OS=Canis lupus familiaris OX=9615 GN=DNASE1L1 PE=3 SV=2	C_familiaris	4	7	4
High	A0A5F4DL21	Nicastrin OS=Canis lupus familiaris OX=9615 GN=NCSTN PE=3 SV=1	C_familiaris	4	8	4
High	J9NYG8	Complement component 4 binding protein beta OS=Canis lupus familiaris OX=9615 GN=C4BPB PE=4 SV=1	C_familiaris	4	19	4
High	E2RPJ4	Glutamate--cysteine ligase OS=Canis lupus familiaris OX=9615 GN=GCLC PE=3 SV=3	C_familiaris	4	8	4
High	F1Q435	Transglutaminase 2 OS=Canis lupus familiaris OX=9615 GN=TGM2 PE=3 SV=3	C_familiaris	4	7	4
High	E2RAI8	Non-specific serine/threonine protein kinase OS=Canis lupus familiaris OX=9615 GN=OXSR1 PE=4 SV=2	C_familiaris	4	7	4
High	F1PP71	Junctional adhesion molecule 1 OS=Canis lupus familiaris OX=9615 GN=F11R PE=3 SV=3	C_familiaris	4	8	4
High	A0A5F4D2Z7	Peptidyl-prolyl cis-trans isomerase OS=Canis lupus familiaris OX=9615 GN=CSNK1G1 PE=3 SV=1	C_familiaris	4	8	4
High	E2RQ14	Annexin OS=Canis lupus familiaris OX=9615 GN=ANXA5 PE=3 SV=3	C_familiaris	4	5	4
High	E2RNX6	Notchless homolog 1 OS=Canis lupus familiaris OX=9615 GN=NLE1 PE=4 SV=3	C_familiaris	4	7	4
High	E2QY31	Platelet-activating factor acetylhydrolase IB subunit alpha OS=Canis lupus familiaris OX=9615 GN=PAFAH1B1 PE=3 SV=1	C_familiaris	4	6	4
High	E2R0B6	Proteasome subunit beta OS=Canis lupus familiaris OX=9615 GN=PSMB6 PE=3 SV=1	C_familiaris	4	7	4
High	A0A5F4C0Q1	Syntaxin 7 OS=Canis lupus familiaris OX=9615 GN=STX7 PE=3 SV=1	C_familiaris	4	5	4
High	E2RGF3	Na(+)/H(+) exchange regulatory cofactor NHE-RF OS=Canis lupus familiaris OX=9615 GN=SLC9A3R1 PE=2 SV=3	C_familiaris	4	5	4
High	A0A5F4CJ02	S-formylglutathione hydrolase OS=Canis lupus familiaris OX=9615 GN=ESD PE=3 SV=1	C_familiaris	4	6	4
High	F1PQ29	Integrin subunit alpha 4 OS=Canis lupus familiaris OX=9615 GN=ITGA4 PE=3 SV=3	C_familiaris	4	5	4
High	A0A5F4C290	Septin 9 OS=Canis lupus familiaris OX=9615 GN=SEPTIN9 PE=3 SV=1	C_familiaris	4	8	4
High	E2QZ19	Serum albumin OS=Canis lupus familiaris OX=9615 GN=AFP PE=4 SV=2	C_familiaris	4	5	4
High	F1PZW8	G protein subunit alpha 13 OS=Canis lupus familiaris OX=9615 GN=GNA13 PE=3 SV=3	C_familiaris	4	8	4
High	E2RPY6	Cytoplasmic protein OS=Canis lupus familiaris OX=9615 GN=NCK2 PE=4 SV=2	C_familiaris	4	7	4
High	A0A5F4BQH7	Chromosome 9 C17orf99 homolog OS=Canis lupus familiaris OX=9615 GN=C9H17orf99 PE=4 SV=1	C_familiaris	4	8	4
High	E2RGK2	Trinucleotide repeat containing adaptor 6B OS=Canis lupus familiaris OX=9615 GN=TNRC6B PE=3 SV=2	C_familiaris	4	6	4
High	F1P9Q2	SH3 domain containing kinase binding protein 1 OS=Canis lupus familiaris OX=9615 GN=SH3KBP1 PE=4 SV=2	C_familiaris	4	5	4
High	J9P5X6	Exportin 7 OS=Canis lupus familiaris OX=9615 GN=XPO7 PE=3 SV=2	C_familiaris	4	5	4
High	A0A5F4C0G8	26S proteasome non-ATPase regulatory subunit 5 OS=Canis lupus familiaris OX=9615 GN=PSMD5 PE=4 SV=1	C_familiaris	4	5	4
High	E2REK5	Transportin 3 OS=Canis lupus familiaris OX=9615 GN=TNPO3 PE=4 SV=3	C_familiaris	4	4	4
High	F1PEG6	Docking protein 2 OS=Canis lupus familiaris OX=9615 GN=DOK2 PE=3 SV=2	C_familiaris	4	5	4
High	P52784	ATP-dependent 6-phosphofructokinase, muscle type OS=Canis lupus familiaris OX=9615 GN=PFKM PE=2 SV=2	C_familiaris	4	5	4
High	J9P4L3	Arachidonate 15-lipoxygenase OS=Canis lupus familiaris OX=9615 GN=ALOX15 PE=3 SV=1	C_familiaris	4	5	4
High	A0A5F4C9I1	Annexin OS=Canis lupus familiaris OX=9615 GN=ANXA2 PE=3 SV=1	C_familiaris	4	8	4
High	L7N0L3	Histone H4 OS=Canis lupus familiaris OX=9615 GN=H4C7 PE=3 SV=2	C_familiaris	4	5	4
High	F6XRY2	Eukaryotic translation elongation factor 2 OS=Canis lupus familiaris OX=9615 GN=EEF2 PE=3 SV=1	C_familiaris	4	6	4
High	F1PHY1	Collagen alpha-2(I) chain OS=Canis lupus familiaris OX=9615 GN=COL1A2 PE=4 SV=1	C_familiaris	4	6	4
High	A0A5F4CE39	Protein-serine/threonine phosphatase OS=Canis lupus familiaris OX=9615 GN=PPM1B PE=3 SV=1	C_familiaris	4	7	4
High	E2RAC6	Vacuolar proton pump subunit B OS=Canis lupus familiaris OX=9615 GN=ATP6V1B2 PE=3 SV=2	C_familiaris	4	5	4
High	F1Q2D2	Glutathione synthetase OS=Canis lupus familiaris OX=9615 GN=GSS PE=3 SV=1	C_familiaris	4	9	4
High	J9NZL6	Reelin OS=Canis lupus familiaris OX=9615 GN=RELN PE=3 SV=2	C_familiaris	4	7	4
High	E2RDX0	Uncharacterized protein OS=Canis lupus familiaris OX=9615 PE=3 SV=2	C_familiaris	4	5	4
High	E2QXP3	Arginyl aminopeptidase OS=Canis lupus familiaris OX=9615 GN=RNPEP PE=3 SV=2	C_familiaris	4	6	4
High	A0A5F4CWT6	Arrestin beta 1 OS=Canis lupus familiaris OX=9615 GN=ARRB1 PE=3 SV=1	C_familiaris	4	5	4
High	A0A5F4BP62	Protein argonaute-2 OS=Canis lupus familiaris OX=9615 GN=AGO2 PE=3 SV=1	C_familiaris	4	4	4
High	E2RK13	Protein XRP2 OS=Canis lupus familiaris OX=9615 GN=RP2 PE=3 SV=1	C_familiaris	4	5	4
High	A0A5F4DKI9	Coagulation factor VIII OS=Canis lupus familiaris OX=9615 GN=F8 PE=3 SV=1	C_familiaris	4	4	4
High	P49822	Albumin OS=Canis lupus familiaris OX=9615 GN=ALB PE=1 SV=3	C_familiaris	42	955	3
High	A0A5F4D0P1	Band 4.1 OS=Canis lupus familiaris OX=9615 GN=EPB41 PE=4 SV=1	C_familiaris	27	111	3
High	P60524	Hemoglobin subunit beta OS=Canis lupus familiaris OX=9615 GN=HBB PE=1 SV=1	C_familiaris	14	283	3
High	E2R2K4	RAP1B, member of RAS oncogene family OS=Canis lupus familiaris OX=9615 GN=RAP1B PE=3 SV=1	C_familiaris	10	84	3
High	E2R886	Kininogen 1 OS=Canis lupus familiaris OX=9615 GN=KNG1 PE=4 SV=3	C_familiaris	18	67	3
High	L7N0G4	Tubulin alpha chain OS=Canis lupus familiaris OX=9615 GN=LOC610636 PE=3 SV=2	C_familiaris	14	44	3
High	A0A5F4DDL4	Ig-like domain-containing protein OS=Canis lupus familiaris OX=9615 PE=4 SV=1	C_familiaris	6	79	3
High	E2R2M7	RAP1A, member of RAS oncogene family OS=Canis lupus familiaris OX=9615 GN=RAP1A PE=3 SV=1	C_familiaris	10	47	3
High	P62822	Ras-related protein Rab-1A OS=Canis lupus familiaris OX=9615 GN=RAB1A PE=1 SV=3	C_familiaris	8	36	3
High	E2QW69	RAB5B, member RAS oncogene family OS=Canis lupus familiaris OX=9615 GN=RAB5B PE=4 SV=1	C_familiaris	6	11	3
High	A0A5F4CWK7	Ig-like domain-containing protein OS=Canis lupus familiaris OX=9615 PE=4 SV=1	C_familiaris	4	37	3
High	F1P6Q0	G protein subunit alpha i3 OS=Canis lupus familiaris OX=9615 GN=GNAI3 PE=4 SV=2	C_familiaris	8	22	3
High	A0A5F4BYG2	Ig-like domain-containing protein OS=Canis lupus familiaris OX=9615 PE=4 SV=1	C_familiaris	4	20	3
High	J9NX28	Small monomeric GTPase OS=Canis lupus familiaris OX=9615 GN=RALA PE=3 SV=1	C_familiaris	6	15	3
High	A0A5F4DAX5	Ig-like domain-containing protein OS=Canis lupus familiaris OX=9615 PE=4 SV=1	C_familiaris	3	11	3
High	P52206	Guanine nucleotide-binding protein subunit alpha-11 (Fragment) OS=Canis lupus familiaris OX=9615 GN=GNA11 PE=2 SV=1	C_familiaris	4	7	3
High	F1PNV5	Coagulation factor XI OS=Canis lupus familiaris OX=9615 GN=F11 PE=4 SV=3	C_familiaris	6	8	3
High	A0A5F4DI88	Peroxiredoxin 4 OS=Canis lupus familiaris OX=9615 GN=PRDX4 PE=4 SV=1	C_familiaris	4	10	3
High	F1PL20	Serine incorporator 1 OS=Canis lupus familiaris OX=9615 GN=SERINC1 PE=3 SV=2	C_familiaris	3	7	3
High	E2R913	Calcium regulated heat stable protein 1 OS=Canis lupus familiaris OX=9615 GN=CARHSP1 PE=4 SV=2	C_familiaris	3	9	3
High	A0A5F4BTM1	Ig-like domain-containing protein OS=Canis lupus familiaris OX=9615 PE=4 SV=1	C_familiaris	4	9	3
High	J9NX73	Ribose-5-phosphate isomerase OS=Canis lupus familiaris OX=9615 GN=RPIA PE=3 SV=1	C_familiaris	3	6	3
High	E2QX53	Glucosamine-6-phosphate isomerase OS=Canis lupus familiaris OX=9615 GN=GNPDA1 PE=3 SV=1	C_familiaris	3	4	3
High	F1PZA1	Isocitrate dehydrogenase [NADP] OS=Canis lupus familiaris OX=9615 GN=IDH1 PE=2 SV=1	C_familiaris	3	7	3
High	E2RP98	Carboxylic ester hydrolase OS=Canis lupus familiaris OX=9615 GN=ACHE PE=3 SV=3	C_familiaris	3	7	3
High	A0A5F4CY61	2-phospho-D-glycerate hydro-lyase OS=Canis lupus familiaris OX=9615 PE=3 SV=1	C_familiaris	3	10	3
High	J9NWA8	Uncharacterized protein OS=Canis lupus familiaris OX=9615 GN=FABP5 PE=3 SV=2	C_familiaris	3	7	3
High	E2RPB8	C-type lectin domain family 3 member B OS=Canis lupus familiaris OX=9615 GN=CLEC3B PE=4 SV=3	C_familiaris	3	4	3
High	F1PAF3	Hepatocyte growth factor activator OS=Canis lupus familiaris OX=9615 GN=HGFAC PE=4 SV=2	C_familiaris	3	5	3
High	E2RBL2	Secretory carrier-associated membrane protein OS=Canis lupus familiaris OX=9615 GN=SCAMP2 PE=3 SV=3	C_familiaris	3	6	3
High	F1PKI4	Chloride intracellular channel protein OS=Canis lupus familiaris OX=9615 GN=CLIC1 PE=3 SV=2	C_familiaris	3	5	3
High	E2R4H4	Proteasome subunit alpha type OS=Canis lupus familiaris OX=9615 GN=PSMA5 PE=3 SV=3	C_familiaris	3	6	3
High	E2R857	Bleomycin hydrolase OS=Canis lupus familiaris OX=9615 GN=BLMH PE=3 SV=1	C_familiaris	3	4	3
High	A0A5F4BU46	Histone H2B OS=Canis lupus familiaris OX=9615 PE=3 SV=1	C_familiaris	3	3	3
High	A0A5F4CCI6	Serine/threonine kinase 24 OS=Canis lupus familiaris OX=9615 GN=STK24 PE=4 SV=1	C_familiaris	3	6	3
High	A0A5F4CP54	Ig-like domain-containing protein OS=Canis lupus familiaris OX=9615 PE=4 SV=1	C_familiaris	3	7	3
High	J9JHP2	Histone H2A OS=Canis lupus familiaris OX=9615 GN=H2AC7 PE=3 SV=2	C_familiaris	3	5	3
High	F1Q1K9	Hyaluronan binding protein 2 OS=Canis lupus familiaris OX=9615 GN=HABP2 PE=4 SV=3	C_familiaris	3	8	3
High	J9NY67	RNA helicase OS=Canis lupus familiaris OX=9615 PE=3 SV=1	C_familiaris	3	6	3
High	A0A5F4CKD6	Protein kinase domain-containing protein OS=Canis lupus familiaris OX=9615 GN=CSNK2A1 PE=4 SV=1	C_familiaris	3	9	3
High	E2RQ54	Ig-like domain-containing protein OS=Canis lupus familiaris OX=9615 GN=LY6G6F PE=4 SV=1	C_familiaris	3	7	3
High	F1PPJ1	Phosphatidylinositol-5-phosphate 4-kinase type 2 alpha OS=Canis lupus familiaris OX=9615 GN=PIP4K2A PE=4 SV=2	C_familiaris	3	5	3
High	A0A5F4BYH6	Syntaxin 2 OS=Canis lupus familiaris OX=9615 GN=STX2 PE=3 SV=1	C_familiaris	3	4	3
High	F1PPI5	Amino acid transporter OS=Canis lupus familiaris OX=9615 GN=SLC1A5 PE=3 SV=2	C_familiaris	3	6	3
High	F6V040	AA_permease_C domain-containing protein OS=Canis lupus familiaris OX=9615 PE=4 SV=2	C_familiaris	4	9	3
High	A0A5F4DKA2	Hemoglobin subunit mu OS=Canis lupus familiaris OX=9615 GN=HBM PE=3 SV=1	C_familiaris	3	9	3
High	A0A5F4D3P9	RRM domain-containing protein OS=Canis lupus familiaris OX=9615 GN=HNRNPC PE=3 SV=1	C_familiaris	3	5	3
High	E2RE13	ADP ribosylation factor like GTPase 8B OS=Canis lupus familiaris OX=9615 GN=ARL8B PE=3 SV=1	C_familiaris	3	7	3
High	A0A5F4BQS4	Drebrin like OS=Canis lupus familiaris OX=9615 GN=DBNL PE=3 SV=1	C_familiaris	3	4	3
High	E2RB37	Protein disulfide isomerase family A member 6 OS=Canis lupus familiaris OX=9615 GN=PDIA6 PE=3 SV=1	C_familiaris	3	5	3
High	E2RCI8	Annexin OS=Canis lupus familiaris OX=9615 GN=ANXA6 PE=3 SV=3	C_familiaris	3	4	3
High	A0A5F4CGL6	G protein-coupled receptor kinase OS=Canis lupus familiaris OX=9615 GN=GRK6 PE=3 SV=1	C_familiaris	3	6	3
High	J9NRZ2	Ras-related protein Rab-18 OS=Canis lupus familiaris OX=9615 GN=RAB18 PE=4 SV=1	C_familiaris	3	7	3
High	E2QSB5	Ephrin B1 OS=Canis lupus familiaris OX=9615 GN=EFNB1 PE=3 SV=1	C_familiaris	3	6	3
High	F1PK43	Nuclear autoantigenic sperm protein OS=Canis lupus familiaris OX=9615 GN=NASP PE=3 SV=2	C_familiaris	3	4	3
High	A0A5F4D669	Charged multivesicular body protein 6 OS=Canis lupus familiaris OX=9615 GN=CHMP6 PE=3 SV=1	C_familiaris	3	8	3
High	F1PN96	DnaJ heat shock protein family (Hsp40) member B2 OS=Canis lupus familiaris OX=9615 GN=DNAJB2 PE=4 SV=3	C_familiaris	3	3	3
High	A0A5F4CGU2	Pyruvate kinase OS=Canis lupus familiaris OX=9615 GN=PKLR PE=3 SV=1	C_familiaris	4	4	3
High	A0A5F4CLV9	SEC31 homolog A, COPII coat complex component OS=Canis lupus familiaris OX=9615 GN=SEC31A PE=3 SV=1	C_familiaris	3	4	3
High	Q5W416	Proteasome subunit beta type-8 OS=Canis lupus familiaris OX=9615 GN=PSMB8 PE=1 SV=1	C_familiaris	3	6	3
High	E2RAL0	Rho GDP dissociation inhibitor beta OS=Canis lupus familiaris OX=9615 GN=ARHGDIB PE=3 SV=1	C_familiaris	3	5	3
High	F1PHZ3	Phosphatidylinositol transfer protein beta OS=Canis lupus familiaris OX=9615 GN=PITPNB PE=4 SV=3	C_familiaris	3	6	3
High	F1PLM7	Transmembrane protein 106B OS=Canis lupus familiaris OX=9615 GN=TMEM106B PE=3 SV=3	C_familiaris	3	6	3
High	F1P7W0	Uncharacterized protein OS=Canis lupus familiaris OX=9615 GN=SELP PE=3 SV=2	C_familiaris	3	4	3
High	A0A5F4CTX8	C1q domain-containing protein OS=Canis lupus familiaris OX=9615 GN=C1QTNF3 PE=4 SV=1	C_familiaris	3	5	3
High	J9NXY7	PDZ and LIM domain 1 OS=Canis lupus familiaris OX=9615 GN=PDLIM1 PE=4 SV=2	C_familiaris	3	3	3
High	A0A5F4CXZ9	Uncharacterized protein OS=Canis lupus familiaris OX=9615 GN=MYL6 PE=4 SV=1	C_familiaris	3	5	3
High	E2QWU0	Actin-related protein 2/3 complex subunit 4 OS=Canis lupus familiaris OX=9615 GN=ARPC4 PE=3 SV=3	C_familiaris	3	6	3
High	E2R5G6	RAS related OS=Canis lupus familiaris OX=9615 GN=RRAS PE=4 SV=1	C_familiaris	3	6	3
High	E2RN00	26S proteasome non-ATPase regulatory subunit 6 OS=Canis lupus familiaris OX=9615 GN=PRICKLE2 PE=3 SV=2	C_familiaris	3	7	3
High	J9P972	DAZ associated protein 1 OS=Canis lupus familiaris OX=9615 GN=DAZAP1 PE=4 SV=2	C_familiaris	3	4	3
High	A0A5F4CC39	Elastin microfibril interfacer 1 OS=Canis lupus familiaris OX=9615 GN=EMILIN1 PE=4 SV=1	C_familiaris	3	4	3
High	A0A5F4CGS2	GST class-pi OS=Canis lupus familiaris OX=9615 GN=GSTP1 PE=3 SV=1	C_familiaris	3	3	3
High	E2RE03	Cadherin-5 OS=Canis lupus familiaris OX=9615 GN=CDH5 PE=4 SV=3	C_familiaris	3	4	3
High	F1PMB5	Sorting nexin-2 OS=Canis lupus familiaris OX=9615 GN=SNX2 PE=3 SV=3	C_familiaris	3	4	3
High	E2QUY7	Proteasome 26S subunit, non-ATPase 3 OS=Canis lupus familiaris OX=9615 GN=PSMD3 PE=3 SV=2	C_familiaris	3	6	3
High	E2QW60	Lectin, mannose binding 1 OS=Canis lupus familiaris OX=9615 GN=LMAN1 PE=4 SV=2	C_familiaris	3	4	3
High	F1PQS8	CKLF like MARVEL transmembrane domain containing 6 OS=Canis lupus familiaris OX=9615 GN=CMTM6 PE=2 SV=2	C_familiaris	3	7	3
High	A0A5F4DJ87	Protein disulfide-isomerase OS=Canis lupus familiaris OX=9615 GN=P4HB PE=3 SV=1	C_familiaris	3	3	3
High	J9P3J4	Uncharacterized protein OS=Canis lupus familiaris OX=9615 GN=SLC29A1 PE=3 SV=2	C_familiaris	3	5	3
High	F1PM26	CD109 molecule OS=Canis lupus familiaris OX=9615 GN=CD109 PE=3 SV=3	C_familiaris	3	3	3
High	F1PAZ6	Enoyl-CoA hydratase, short chain 1 OS=Canis lupus familiaris OX=9615 GN=ECHS1 PE=3 SV=3	C_familiaris	3	4	3
High	A0A5F4CUP0	Poly(A) binding protein cytoplasmic 1 OS=Canis lupus familiaris OX=9615 GN=PABPC1 PE=3 SV=1	C_familiaris	3	4	3
High	F1PHN8	Serpin family A member 4 OS=Canis lupus familiaris OX=9615 GN=SERPINA4 PE=3 SV=3	C_familiaris	3	5	3
High	A0A5F4BUJ7	Ig-like domain-containing protein OS=Canis lupus familiaris OX=9615 PE=4 SV=1	C_familiaris	3	8	3
High	A0A5F4D491	Dihydrolipoyllysine-residue succinyltransferase component of 2-oxoglutarate dehydrogenase complex, mitochondrial OS=Canis lupus familiaris OX=9615 GN=DLST PE=3 SV=1	C_familiaris	3	5	3
High	J9P3H7	Uncharacterized protein OS=Canis lupus familiaris OX=9615 GN=DDI2 PE=3 SV=2	C_familiaris	3	3	3
High	E2R7N4	Hematopoietic cell-specific Lyn substrate 1 OS=Canis lupus familiaris OX=9615 GN=HCLS1 PE=4 SV=2	C_familiaris	3	4	3
High	F1PDM3	GATOR complex protein SEC13 OS=Canis lupus familiaris OX=9615 GN=SEC13 PE=3 SV=2	C_familiaris	3	4	3
High	E2RB45	Phosphatidylinositol 4-kinase type 2 OS=Canis lupus familiaris OX=9615 GN=PGAM1 PE=3 SV=3	C_familiaris	3	3	3
High	F1PEN8	Carboxylic ester hydrolase OS=Canis lupus familiaris OX=9615 GN=BCHE PE=3 SV=1	C_familiaris	3	4	3
High	J9P740	Thioredoxin like 1 OS=Canis lupus familiaris OX=9615 GN=TXNL1 PE=4 SV=2	C_familiaris	3	3	3
High	F6XH46	Glutathione peroxidase OS=Canis lupus familiaris OX=9615 GN=GPX1 PE=3 SV=2	C_familiaris	3	4	3
High	E2RNV4	G protein-coupled receptor class C group 5 member D OS=Canis lupus familiaris OX=9615 GN=GPRC5D PE=3 SV=2	C_familiaris	3	6	3
High	A0A5F4CAX2	Uncharacterized protein OS=Canis lupus familiaris OX=9615 PE=4 SV=1	C_familiaris	3	4	3
High	A0A5F4C7B8	Two pore segment channel 2 OS=Canis lupus familiaris OX=9615 GN=TPCN2 PE=4 SV=1	C_familiaris	3	4	3
High	J9JHY9	Nucleoporin 153 OS=Canis lupus familiaris OX=9615 GN=NUP153 PE=4 SV=2	C_familiaris	3	4	3
High	E2R1R4	Uncharacterized protein OS=Canis lupus familiaris OX=9615 GN=ATP6V1E1 PE=3 SV=1	C_familiaris	3	3	3
High	E2RIU2	Charged multivesicular body protein 2A OS=Canis lupus familiaris OX=9615 GN=CHMP2A PE=3 SV=2	C_familiaris	3	5	3
High	A0A5F4CGC6	Cullin 2 OS=Canis lupus familiaris OX=9615 GN=CUL2 PE=3 SV=1	C_familiaris	3	3	3
High	J9P8M2	Fibronectin OS=Canis lupus familiaris OX=9615 GN=FN1 PE=4 SV=2	C_familiaris	81	576	2
High	F2Z4Q6	Serum albumin OS=Canis lupus familiaris OX=9615 GN=AFP PE=4 SV=2	C_familiaris	41	956	2
High	F1PYZ1	Uncharacterized protein OS=Canis lupus familiaris OX=9615 GN=LOC609402 PE=3 SV=3	C_familiaris	14	253	2
High	F1PBT3	Fructose-bisphosphate aldolase OS=Canis lupus familiaris OX=9615 GN=ALDOA PE=3 SV=3	C_familiaris	18	61	2
High	E2RJW7	Adducin 1 OS=Canis lupus familiaris OX=9615 GN=ADD1 PE=3 SV=3	C_familiaris	14	34	2
High	E2RBC3	Tubulin alpha chain OS=Canis lupus familiaris OX=9615 GN=TUBA4A PE=3 SV=2	C_familiaris	13	39	2
High	E2QSF4	Tubulin beta chain OS=Canis lupus familiaris OX=9615 GN=TUBB PE=3 SV=1	C_familiaris	15	41	2
High	F1PZH8	Bridging integrator 2 OS=Canis lupus familiaris OX=9615 GN=BIN2 PE=4 SV=3	C_familiaris	15	45	2
High	A0A5F4CE12	Ig-like domain-containing protein OS=Canis lupus familiaris OX=9615 PE=4 SV=1	C_familiaris	4	52	2
High	J9JHN1	RAB11B, member RAS oncogene family OS=Canis lupus familiaris OX=9615 GN=RAB11B PE=4 SV=1	C_familiaris	11	32	2
High	F1PCH3	2-phospho-D-glycerate hydro-lyase OS=Canis lupus familiaris OX=9615 GN=ENO1 PE=4 SV=3	C_familiaris	7	18	2
High	A0A5F4CLB9	Ig-like domain-containing protein OS=Canis lupus familiaris OX=9615 PE=4 SV=1	C_familiaris	3	80	2
High	L7N0I1	Uncharacterized protein OS=Canis lupus familiaris OX=9615 GN=MYL12B PE=4 SV=1	C_familiaris	6	15	2
High	F1P634	Myosin light chain 9 OS=Canis lupus familiaris OX=9615 GN=MYL9 PE=4 SV=2	C_familiaris	6	20	2
High	A0A5F4DCE0	Tropomyosin 1 OS=Canis lupus familiaris OX=9615 GN=TPM1 PE=3 SV=1	C_familiaris	9	22	2
High	A0A5S6CBX9	F-actin-capping protein subunit alpha-2 OS=Canis lupus familiaris OX=9615 GN=CAPZA2 PE=3 SV=1	C_familiaris	4	7	2
High	E2RPA8	Tetraspanin OS=Canis lupus familiaris OX=9615 GN=CD151 PE=3 SV=3	C_familiaris	2	11	2
High	A0A5F4CT62	14-3-3 protein theta OS=Canis lupus familiaris OX=9615 GN=YWHAQ PE=3 SV=1	C_familiaris	5	9	2
High	A0A5F4DER9	Aquaporin-1 OS=Canis lupus familiaris OX=9615 GN=AQP1 PE=3 SV=1	C_familiaris	2	18	2
High	F2Z4P9	Ras-related protein Rab-10 OS=Canis lupus familiaris OX=9615 GN=RAB10 PE=4 SV=1	C_familiaris	4	25	2
High	E2RLB2	Small monomeric GTPase OS=Canis lupus familiaris OX=9615 GN=RALB PE=3 SV=1	C_familiaris	5	11	2
High	P18066	Ras-related protein Rab-5A OS=Canis lupus familiaris OX=9615 GN=RAB5A PE=1 SV=1	C_familiaris	5	8	2
High	E2QW85	Elongation factor 1-alpha OS=Canis lupus familiaris OX=9615 PE=3 SV=2	C_familiaris	5	11	2
High	A0A5F4DCA5	Ig-like domain-containing protein OS=Canis lupus familiaris OX=9615 PE=4 SV=1	C_familiaris	4	12	2
High	F1PNR5	Coagulation factor XI OS=Canis lupus familiaris OX=9615 GN=F11 PE=3 SV=3	C_familiaris	5	7	2
High	J9NYJ8	RAB6A, member RAS oncogene family OS=Canis lupus familiaris OX=9615 GN=RAB6A PE=4 SV=1	C_familiaris	4	16	2
High	A0A5F4C7L7	Tetraspanin OS=Canis lupus familiaris OX=9615 GN=TSPAN9 PE=3 SV=1	C_familiaris	2	8	2
High	A0A5F4CZV7	Ig-like domain-containing protein OS=Canis lupus familiaris OX=9615 PE=4 SV=1	C_familiaris	2	7	2
High	E2R9D2	Coagulation factor XII OS=Canis lupus familiaris OX=9615 GN=F12 PE=4 SV=3	C_familiaris	2	5	2
High	F1PEZ2	NDK domain-containing protein OS=Canis lupus familiaris OX=9615 GN=NME4 PE=3 SV=3	C_familiaris	5	12	2
High	A0A5F4BSL9	Uncharacterized protein OS=Canis lupus familiaris OX=9615 PE=3 SV=1	C_familiaris	4	11	2
High	A0A5F4C5A8	Ig-like domain-containing protein OS=Canis lupus familiaris OX=9615 PE=4 SV=1	C_familiaris	3	7	2
High	F1PVE5	Vesicle-fusing ATPase OS=Canis lupus familiaris OX=9615 GN=VPS4B PE=3 SV=2	C_familiaris	4	6	2
High	E2QW82	Matrix metallopeptidase 19 OS=Canis lupus familiaris OX=9615 GN=MMP19 PE=3 SV=3	C_familiaris	2	4	2
High	A0A5F4DBI9	Vesicle associated membrane protein 3 OS=Canis lupus familiaris OX=9615 GN=VAMP3 PE=4 SV=1	C_familiaris	2	3	2
High	A0A5F4DA40	Eukaryotic translation initiation factor 5A OS=Canis lupus familiaris OX=9615 GN=EIF5A PE=3 SV=1	C_familiaris	2	5	2
High	F1PI87	Obg-like ATPase 1 OS=Canis lupus familiaris OX=9615 GN=OLA1 PE=3 SV=3	C_familiaris	2	3	2
High	A0A5F4DCB6	Nucleosome assembly protein 1 like 1 OS=Canis lupus familiaris OX=9615 GN=NAP1L1 PE=3 SV=1	C_familiaris	3	8	2
High	A7VLI5	Glycophorin C OS=Canis lupus familiaris OX=9615 GN=Gypc PE=2 SV=1	C_familiaris	2	4	2
High	E2RQ71	Apolipoprotein M OS=Canis lupus familiaris OX=9615 GN=APOM PE=3 SV=2	C_familiaris	2	5	2
High	A0A5F4BY19	RELT like 1 OS=Canis lupus familiaris OX=9615 GN=RELL1 PE=3 SV=1	C_familiaris	2	3	2
High	F1PIV8	EF-hand domain family member D2 OS=Canis lupus familiaris OX=9615 GN=EFHD2 PE=4 SV=3	C_familiaris	2	3	2
High	A0A5F4CI04	Secretory carrier-associated membrane protein OS=Canis lupus familiaris OX=9615 GN=SCAMP3 PE=3 SV=1	C_familiaris	2	3	2
High	A0A5F4D8G2	NSF attachment protein alpha OS=Canis lupus familiaris OX=9615 GN=NAPA PE=3 SV=1	C_familiaris	2	4	2
High	A0A5F4CKF4	Tetraspanin OS=Canis lupus familiaris OX=9615 GN=TSPAN2 PE=3 SV=1	C_familiaris	2	4	2
High	J9P4C5	BCL2 associated athanogene 2 OS=Canis lupus familiaris OX=9615 GN=BAG2 PE=4 SV=1	C_familiaris	2	3	2
High	J9P7X2	Thy-1 antigen OS=Canis lupus familiaris OX=9615 GN=THY1 PE=4 SV=1	C_familiaris	2	5	2
High	A0A5F4CV51	RAB23, member RAS oncogene family OS=Canis lupus familiaris OX=9615 GN=RAB23 PE=4 SV=1	C_familiaris	2	2	2
High	J9PAW2	Importin subunit alpha OS=Canis lupus familiaris OX=9615 GN=KPNA4 PE=3 SV=1	C_familiaris	4	6	2
High	P61017	Ras-related protein Rab-4B OS=Canis lupus familiaris OX=9615 GN=RAB4B PE=2 SV=1	C_familiaris	3	11	2
High	A0A5F4CT58	Thioredoxin-disulfide reductase OS=Canis lupus familiaris OX=9615 GN=TXNRD2 PE=3 SV=1	C_familiaris	2	6	2
High	A0A5F4D804	Voltage-dependent anion-selective channel protein 2 OS=Canis lupus familiaris OX=9615 GN=VDAC2 PE=3 SV=1	C_familiaris	2	5	2
High	A0A5F4DGD5	Ig-like domain-containing protein OS=Canis lupus familiaris OX=9615 PE=4 SV=1	C_familiaris	2	4	2
High	F1Q260	Lysosomal associated membrane protein 1 OS=Canis lupus familiaris OX=9615 GN=LAMP1 PE=3 SV=3	C_familiaris	2	3	2
High	E2QXD6	Glyoxalase domain-containing protein 4 OS=Canis lupus familiaris OX=9615 GN=GLOD4 PE=4 SV=3	C_familiaris	2	2	2
High	F1PAL5	Angiotensin 1-10 OS=Canis lupus familiaris OX=9615 GN=AGT PE=3 SV=3	C_familiaris	2	3	2
High	A0A5F4DGH8	Eukaryotic translation initiation factor 3 subunit J OS=Canis lupus familiaris OX=9615 GN=EIF3J PE=3 SV=1	C_familiaris	2	3	2
High	A0A5F4DD49	Serine incorporator 3 OS=Canis lupus familiaris OX=9615 GN=SERINC3 PE=3 SV=1	C_familiaris	2	6	2
High	E2R8K8	Uncharacterized protein OS=Canis lupus familiaris OX=9615 GN=LOC490399 PE=4 SV=3	C_familiaris	3	7	2
High	A0A5F4CNI4	Solute carrier family 44 member 2 OS=Canis lupus familiaris OX=9615 GN=SLC44A2 PE=3 SV=1	C_familiaris	2	6	2
High	E2RAM4	Fc receptor gamma-chain OS=Canis lupus familiaris OX=9615 GN=FCER1G PE=3 SV=1	C_familiaris	2	4	2
High	A0A5F4C1T9	Tetraspanin OS=Canis lupus familiaris OX=9615 GN=TSPAN14 PE=3 SV=1	C_familiaris	2	3	2
High	J9NZ45	RAP2B, member of RAS oncogene family OS=Canis lupus familiaris OX=9615 GN=RAP2B PE=4 SV=2	C_familiaris	2	5	2
High	A0A5F4C1B3	Transgelin OS=Canis lupus familiaris OX=9615 GN=TAGLN2 PE=3 SV=1	C_familiaris	2	4	2
High	A0A5F4CXX0	Reticulon OS=Canis lupus familiaris OX=9615 GN=RTN3 PE=4 SV=1	C_familiaris	2	3	2
High	A0A5F4DIK8	Four and a half LIM domains 1 OS=Canis lupus familiaris OX=9615 GN=FHL1 PE=4 SV=1	C_familiaris	2	7	2
High	A0A5F4DJ18	Ig-like domain-containing protein OS=Canis lupus familiaris OX=9615 PE=4 SV=1	C_familiaris	2	8	2
High	J9NYK7	Uncharacterized protein OS=Canis lupus familiaris OX=9615 GN=MYADM PE=4 SV=1	C_familiaris	2	4	2
High	P81546	Metalloproteinase inhibitor 1 OS=Canis lupus familiaris OX=9615 GN=TIMP1 PE=1 SV=2	C_familiaris	2	4	2
High	E2R478	Neuronal pentraxin 1 OS=Canis lupus familiaris OX=9615 GN=NPTX1 PE=4 SV=1	C_familiaris	2	4	2
High	J9P9M0	Ras-related protein Rab OS=Canis lupus familiaris OX=9615 GN=RAB32 PE=3 SV=2	C_familiaris	2	4	2
High	A0A5F4DDV1	Periostin OS=Canis lupus familiaris OX=9615 GN=POSTN PE=4 SV=1	C_familiaris	2	3	2
High	A0A5F4C5J5	Glycoprotein VI platelet OS=Canis lupus familiaris OX=9615 GN=GP6 PE=4 SV=1	C_familiaris	2	2	2
High	F1Q0S2	Sodium/potassium-transporting ATPase subunit beta OS=Canis lupus familiaris OX=9615 GN=ATP1B3 PE=3 SV=3	C_familiaris	2	5	2
High	A0A5F4BRN0	Hepatocyte growth factor-regulated tyrosine kinase substrate OS=Canis lupus familiaris OX=9615 GN=HGS PE=4 SV=1	C_familiaris	2	2	2
High	F6Y6B4	SH3 domain binding glutamate rich protein like 2 OS=Canis lupus familiaris OX=9615 GN=SH3BGRL2 PE=3 SV=2	C_familiaris	2	2	2
High	J9P6Y7	Solute carrier family 30 member 1 OS=Canis lupus familiaris OX=9615 GN=SLC30A1 PE=3 SV=1	C_familiaris	2	3	2
High	A0A5F4CJX3	Adenosine kinase OS=Canis lupus familiaris OX=9615 GN=ADK PE=3 SV=1	C_familiaris	2	5	2
High	A0A5F4CD04	Abl interactor 1 OS=Canis lupus familiaris OX=9615 GN=ABI1 PE=3 SV=1	C_familiaris	2	2	2
High	A0A5F4CYJ6	Aldehyde dehydrogenase family 16 member A1 OS=Canis lupus familiaris OX=9615 GN=ALDH16A1 PE=3 SV=1	C_familiaris	2	3	2
High	F1P7F8	Zyxin OS=Canis lupus familiaris OX=9615 GN=ZYX PE=4 SV=3	C_familiaris	2	2	2
High	A0A5F4BX14	Mannose-6-phosphate receptor, cation dependent OS=Canis lupus familiaris OX=9615 GN=M6PR PE=4 SV=1	C_familiaris	2	4	2
High	J9NRP8	Twinfilin actin binding protein 1 OS=Canis lupus familiaris OX=9615 GN=TWF1 PE=3 SV=2	C_familiaris	2	2	2
High	E2RQ34	Megakaryocyte and platelet inhibitory receptor G6b OS=Canis lupus familiaris OX=9615 GN=MPIG6B PE=4 SV=2	C_familiaris	2	7	2
High	E2R9R6	Programmed cell death 10 OS=Canis lupus familiaris OX=9615 GN=PDCD10 PE=3 SV=3	C_familiaris	2	3	2
High	E2RC10	Synaptophysin like 1 OS=Canis lupus familiaris OX=9615 GN=SYPL1 PE=3 SV=3	C_familiaris	2	3	2
High	F1Q0B6	Src kinase associated phosphoprotein 2 OS=Canis lupus familiaris OX=9615 GN=SKAP2 PE=3 SV=2	C_familiaris	2	3	2
High	A0A5F4D5P6	Erbb2 interacting protein OS=Canis lupus familiaris OX=9615 GN=ERBIN PE=4 SV=1	C_familiaris	2	4	2
High	A0A5F4D7F7	ABRA C-terminal like OS=Canis lupus familiaris OX=9615 GN=ABRACL PE=4 SV=1	C_familiaris	2	2	2
High	H9GWC7	Protein-ribulosamine 3-kinase OS=Canis lupus familiaris OX=9615 GN=FN3KRP PE=3 SV=3	C_familiaris	2	2	2
High	A0A5F4D4Z6	Adipsin OS=Canis lupus familiaris OX=9615 GN=ARHGAP45 PE=4 SV=1	C_familiaris	2	4	2
High	A0A5F4BTS3	WASP actin nucleation promoting factor OS=Canis lupus familiaris OX=9615 GN=WAS PE=4 SV=1	C_familiaris	2	2	2
High	F1Q136	Vesicle associated membrane protein 5 OS=Canis lupus familiaris OX=9615 GN=VAMP5 PE=4 SV=3	C_familiaris	2	3	2
High	E2R2A1	Golgin A7 OS=Canis lupus familiaris OX=9615 GN=GOLGA7 PE=4 SV=2	C_familiaris	2	2	2
High	A0A5F4CKV5	Solute carrier family 12 member 7 OS=Canis lupus familiaris OX=9615 GN=SLC12A7 PE=3 SV=1	C_familiaris	2	4	2
High	J9P1D1	Glia maturation factor OS=Canis lupus familiaris OX=9615 GN=GMFG PE=3 SV=2	C_familiaris	2	3	2
High	A0A5F4CSP7	Ig-like domain-containing protein OS=Canis lupus familiaris OX=9615 PE=4 SV=1	C_familiaris	2	3	2
High	A0A5F4CLF7	Calmodulin 1 OS=Canis lupus familiaris OX=9615 GN=CALM1 PE=4 SV=1	C_familiaris	2	4	2
High	F1PGJ5	Scavenger receptor class B member 2 OS=Canis lupus familiaris OX=9615 GN=SCARB2 PE=3 SV=2	C_familiaris	2	4	2
High	F1Q2X9	Natural resistance-associated macrophage protein 1 OS=Canis lupus familiaris OX=9615 GN=SLC11A2 PE=3 SV=3	C_familiaris	2	3	2
High	A0A5F4CSM6	Hsp90 chaperone protein kinase-targeting subunit OS=Canis lupus familiaris OX=9615 GN=CDC37 PE=3 SV=1	C_familiaris	2	3	2
High	E2R5Z5	Transmembrane 9 superfamily member OS=Canis lupus familiaris OX=9615 GN=TM9SF2 PE=3 SV=2	C_familiaris	2	3	2
High	A0A5F4BY22	EF-hand domain-containing protein OS=Canis lupus familiaris OX=9615 GN=S100A9 PE=4 SV=1	C_familiaris	2	3	2
High	F1PHS2	Serpin family A member 11 OS=Canis lupus familiaris OX=9615 GN=SERPINA11 PE=3 SV=2	C_familiaris	2	3	2
High	E2RNV3	PITH domain containing 1 OS=Canis lupus familiaris OX=9615 GN=PITHD1 PE=4 SV=3	C_familiaris	2	3	2
High	A0A5F4DBN6	Glutathione-disulfide reductase OS=Canis lupus familiaris OX=9615 GN=GSR PE=3 SV=1	C_familiaris	2	3	2
High	E2QX78	Solute carrier family 43 member 3 OS=Canis lupus familiaris OX=9615 GN=SLC43A3 PE=4 SV=1	C_familiaris	2	3	2
High	A0A5F4DCG3	Ig-like domain-containing protein OS=Canis lupus familiaris OX=9615 PE=4 SV=1	C_familiaris	2	6	2
High	F1PD37	Serine/threonine-protein phosphatase 2A activator OS=Canis lupus familiaris OX=9615 GN=PTPA PE=3 SV=3	C_familiaris	2	4	2
High	F1PQ92	STE20 related adaptor beta OS=Canis lupus familiaris OX=9615 GN=STRADB PE=4 SV=2	C_familiaris	2	3	2
High	E2QWN4	N-acetylneuraminate synthase OS=Canis lupus familiaris OX=9615 GN=NANS PE=4 SV=2	C_familiaris	2	3	2
High	F1PX57	26S proteasome non-ATPase regulatory subunit 1 OS=Canis lupus familiaris OX=9615 GN=PSMD1 PE=3 SV=3	C_familiaris	2	3	2
High	A0A5F4BSS2	75 kDa glucose-regulated protein OS=Canis lupus familiaris OX=9615 GN=HSPA9 PE=3 SV=1	C_familiaris	2	2	2
High	P18470	DLA class II histocompatibility antigen, DR-1 beta chain OS=Canis lupus familiaris OX=9615 PE=2 SV=1	C_familiaris	2	4	2
High	E2RPP4	Non-specific serine/threonine protein kinase OS=Canis lupus familiaris OX=9615 GN=CDC42BPB PE=3 SV=3	C_familiaris	2	2	2
High	J9P3M1	LIM and SH3 domain protein 1 OS=Canis lupus familiaris OX=9615 GN=LASP1 PE=4 SV=2	C_familiaris	2	2	2
High	A0A5F4D856	Proline-serine-threonine phosphatase interacting protein 1 OS=Canis lupus familiaris OX=9615 GN=PSTPIP1 PE=4 SV=1	C_familiaris	2	3	2
High	A0A5F4D269	Synaptotagmin like 4 OS=Canis lupus familiaris OX=9615 GN=SYTL4 PE=4 SV=1	C_familiaris	2	3	2
High	F1Q4J0	Glucosidase II alpha subunit OS=Canis lupus familiaris OX=9615 GN=GANAB PE=3 SV=2	C_familiaris	2	2	2
High	E2R7P9	P2X purinoceptor OS=Canis lupus familiaris OX=9615 GN=P2RX1 PE=3 SV=1	C_familiaris	2	4	2
High	F1PPB6	2-deoxy-D-ribose 5-phosphate aldolase OS=Canis lupus familiaris OX=9615 GN=STRAP PE=4 SV=3	C_familiaris	2	2	2
High	E2QXD1	Annexin OS=Canis lupus familiaris OX=9615 GN=ANXA7 PE=3 SV=2	C_familiaris	2	2	2
High	H9GW57	Uncharacterized protein OS=Canis lupus familiaris OX=9615 GN=LOC475497 PE=3 SV=3	C_familiaris	2	6	2
High	F6UY11	Proteasome activator subunit 1 OS=Canis lupus familiaris OX=9615 GN=PSME1 PE=3 SV=2	C_familiaris	2	3	2
High	E2R7A0	Hydroxyacylglutathione hydrolase OS=Canis lupus familiaris OX=9615 GN=HAGH PE=3 SV=2	C_familiaris	2	3	2
High	F1PC59	Peroxiredoxin-6 OS=Canis lupus familiaris OX=9615 GN=PRDX6 PE=3 SV=2	C_familiaris	2	3	2
High	E2R0L9	CCT-alpha OS=Canis lupus familiaris OX=9615 GN=TCP1 PE=3 SV=1	C_familiaris	2	3	2
High	F1PKU7	Protein kinase C beta type OS=Canis lupus familiaris OX=9615 GN=PRKCB PE=3 SV=3	C_familiaris	2	3	2
High	L7N0E8	Ig-like domain-containing protein OS=Canis lupus familiaris OX=9615 PE=4 SV=2	C_familiaris	2	8	2
High	J9NTG7	CD55 molecule OS=Canis lupus familiaris OX=9615 GN=CD55 PE=4 SV=2	C_familiaris	2	3	2
High	F1PIT4	Tetraspanin OS=Canis lupus familiaris OX=9615 GN=CD63 PE=3 SV=2	C_familiaris	2	5	2
High	E2RHL4	ADP ribosylation factor 6 OS=Canis lupus familiaris OX=9615 GN=ARF6 PE=3 SV=2	C_familiaris	2	5	2
High	E2RL17	Eukaryotic translation initiation factor 2 subunit 1 OS=Canis lupus familiaris OX=9615 GN=EIF2S1 PE=3 SV=1	C_familiaris	2	2	2
High	A0A5F4CK68	Versican OS=Canis lupus familiaris OX=9615 GN=VCAN PE=3 SV=1	C_familiaris	2	3	2
High	A0A5F4D4K2	Late endosomal/lysosomal adaptor and MAPK and MTOR activator 1 OS=Canis lupus familiaris OX=9615 GN=LAMTOR1 PE=3 SV=1	C_familiaris	2	2	2
High	F1PFM6	Collagen type VI alpha 1 chain OS=Canis lupus familiaris OX=9615 GN=COL6A1 PE=4 SV=2	C_familiaris	2	2	2
High	J9P7W8	Inositol-1-monophosphatase OS=Canis lupus familiaris OX=9615 GN=IMPA1 PE=3 SV=1	C_familiaris	2	2	2
High	F1PBG0	5'-AMP-activated protein kinase subunit gamma-1 OS=Canis lupus familiaris OX=9615 GN=PRKAG1 PE=3 SV=2	C_familiaris	2	5	2
High	E2R629	Atypical chemokine receptor 1 OS=Canis lupus familiaris OX=9615 GN=ACKR1 PE=3 SV=1	C_familiaris	2	5	2
High	A0A5F4CDM2	DNA damage-binding protein 1 OS=Canis lupus familiaris OX=9615 GN=DDB1 PE=3 SV=1	C_familiaris	2	2	2
High	A0A5F4CIR1	Nidogen 1 OS=Canis lupus familiaris OX=9615 GN=NID1 PE=4 SV=1	C_familiaris	2	2	2
High	E2QW34	Proteasome subunit beta OS=Canis lupus familiaris OX=9615 GN=PSMB2 PE=3 SV=1	C_familiaris	2	3	2
High	F1PFB7	WAS/WASL interacting protein family member 1 OS=Canis lupus familiaris OX=9615 GN=WIPF1 PE=4 SV=3	C_familiaris	2	3	2
High	A0A5F4CT48	Integrin subunit alpha M OS=Canis lupus familiaris OX=9615 GN=ITGAM PE=3 SV=1	C_familiaris	2	3	2
High	J9P3T9	RAN binding protein 1 OS=Canis lupus familiaris OX=9615 GN=RANBP1 PE=4 SV=2	C_familiaris	2	3	2
High	P56595	Apolipoprotein C-I OS=Canis lupus familiaris OX=9615 GN=APOC1 PE=1 SV=1	C_familiaris	2	6	2
High	E2RKS4	Eukaryotic translation initiation factor 4B OS=Canis lupus familiaris OX=9615 GN=EIF4B PE=4 SV=2	C_familiaris	2	4	2
High	A0A5F4CTQ3	LRR binding FLII interacting protein 1 OS=Canis lupus familiaris OX=9615 GN=LRRFIP1 PE=3 SV=1	C_familiaris	2	2	2
High	J9P988	2'-phospho-ADP-ribosyl cyclase OS=Canis lupus familiaris OX=9615 GN=CD38 PE=3 SV=2	C_familiaris	2	3	2
High	A0A5F4BP76	Aldehyde dehydrogenase 9 family member A1 OS=Canis lupus familiaris OX=9615 GN=ALDH9A1 PE=3 SV=1	C_familiaris	2	2	2
High	F1PDQ4	Cytoplasmic FMR1-interacting protein OS=Canis lupus familiaris OX=9615 GN=CYFIP1 PE=3 SV=3	C_familiaris	2	2	2
High	F1PBM2	Vesicle trafficking 1 OS=Canis lupus familiaris OX=9615 GN=VTA1 PE=3 SV=2	C_familiaris	2	3	2
High	E2RNT3	RNA helicase OS=Canis lupus familiaris OX=9615 GN=DHX9 PE=3 SV=1	C_familiaris	2	3	2
High	A0A5F4CQZ6	PDZ and LIM domain 5 OS=Canis lupus familiaris OX=9615 GN=PDLIM5 PE=4 SV=1	C_familiaris	2	2	2
High	F1PJV8	Solute carrier family 38 member 5 OS=Canis lupus familiaris OX=9615 GN=SLC38A5 PE=4 SV=3	C_familiaris	2	2	2
High	A0A5F4CCT6	Ribose-phosphate diphosphokinase OS=Canis lupus familiaris OX=9615 GN=PRPS2 PE=3 SV=1	C_familiaris	2	3	2
High	E2R020	Ras homolog family member G OS=Canis lupus familiaris OX=9615 GN=RHOG PE=4 SV=3	C_familiaris	2	2	2
High	E2RRD4	Thioredoxin domain-containing protein OS=Canis lupus familiaris OX=9615 GN=PRDX3 PE=4 SV=2	C_familiaris	2	2	2
High	A0A5F4CK47	Presenilin OS=Canis lupus familiaris OX=9615 GN=PSEN2 PE=3 SV=1	C_familiaris	2	2	2
High	F1PG13	Ubiquitin conjugating enzyme E2 O OS=Canis lupus familiaris OX=9615 GN=UBE2O PE=4 SV=3	C_familiaris	2	2	2
High	J9NSQ4	Regulator of G protein signaling 10 OS=Canis lupus familiaris OX=9615 GN=RGS10 PE=4 SV=2	C_familiaris	2	2	2
High	A0A5F4BU90	Eukaryotic translation initiation factor 5 OS=Canis lupus familiaris OX=9615 GN=MARK3 PE=3 SV=1	C_familiaris	2	2	2
High	F6XIK8	Synaptotagmin binding cytoplasmic RNA interacting protein OS=Canis lupus familiaris OX=9615 GN=SYNCRIP PE=4 SV=1	C_familiaris	2	2	2
High	E2RNY7	ATP synthase subunit gamma OS=Canis lupus familiaris OX=9615 GN=ATP5F1C PE=2 SV=3	C_familiaris	2	2	2
High	A0A5F4BUH8	Ubiquitinyl hydrolase 1 OS=Canis lupus familiaris OX=9615 GN=USP9X PE=3 SV=1	C_familiaris	2	2	2
High	E2R6K5	Histone H3 OS=Canis lupus familiaris OX=9615 GN=H3-3A PE=3 SV=1	C_familiaris	2	2	2
High	F1PS24	Collagen type II alpha 1 chain OS=Canis lupus familiaris OX=9615 GN=COL2A1 PE=4 SV=2	C_familiaris	2	2	2
High	F1P7C2	Alanine--tRNA ligase OS=Canis lupus familiaris OX=9615 GN=AARS1 PE=3 SV=2	C_familiaris	2	3	2
High	A0A5F4CGU5	Calcium-transporting ATPase OS=Canis lupus familiaris OX=9615 GN=ATP2B2 PE=3 SV=1	C_familiaris	2	2	2
High	J9P1M6	Ubiquitin conjugating enzyme E2 V1 OS=Canis lupus familiaris OX=9615 GN=UBE2V1 PE=4 SV=2	C_familiaris	2	2	2
High	E2RQ37	Lymphocyte antigen 6 family member G6C OS=Canis lupus familiaris OX=9615 GN=LY6G6C PE=4 SV=1	C_familiaris	2	3	2
High	F6Y241	Vacuolar protein sorting 45 homolog OS=Canis lupus familiaris OX=9615 GN=VPS45 PE=3 SV=2	C_familiaris	2	2	2
High	A0A5F4DKK2	Attractin OS=Canis lupus familiaris OX=9615 GN=ATRN PE=4 SV=1	C_familiaris	2	2	2
High	F1PCJ7	Polypyrimidine tract-binding protein 1 OS=Canis lupus familiaris OX=9615 GN=PTBP1 PE=4 SV=2	C_familiaris	2	2	2
High	A0A5F4DNE9	Fibronectin OS=Canis lupus familiaris OX=9615 GN=FN1 PE=4 SV=1	C_familiaris	80	560	1
High	Q28275	Fibronectin (Fragment) OS=Canis lupus familiaris OX=9615 GN=FN1 PE=2 SV=3	C_familiaris	68	468	1
High	A0A5F4CX43	Ankyrin 1 OS=Canis lupus familiaris OX=9615 GN=ANK1 PE=4 SV=1	C_familiaris	77	337	1
High	F1PRD8	Ankyrin 1 OS=Canis lupus familiaris OX=9615 GN=ANK1 PE=4 SV=3	C_familiaris	77	337	1
High	A0A5F4CL11	Ankyrin 1 OS=Canis lupus familiaris OX=9615 GN=ANK1 PE=4 SV=1	C_familiaris	77	336	1
High	O18840	Actin, cytoplasmic 1 OS=Canis lupus familiaris OX=9615 GN=ACTB PE=2 SV=3	C_familiaris	18	205	1
High	Z4YHI2	Uncharacterized protein OS=Canis lupus familiaris OX=9615 GN=ACTG1 PE=3 SV=2	C_familiaris	18	199	1
High	Q6Q7P4	Protein 4.1 OS=Canis lupus familiaris OX=9615 GN=EPB41 PE=2 SV=1	C_familiaris	25	106	1
High	A0A5F4DCJ3	WD repeat domain 1 OS=Canis lupus familiaris OX=9615 GN=WDR1 PE=4 SV=1	C_familiaris	21	53	1
High	J9NXL3	Uncharacterized protein OS=Canis lupus familiaris OX=9615 GN=LOC100855540 PE=3 SV=2	C_familiaris	10	131	1
High	P60529	Hemoglobin subunit alpha OS=Canis lupus familiaris OX=9615 GN=HBA PE=1 SV=1	C_familiaris	10	158	1
High	F1PR93	WD repeat domain 1 OS=Canis lupus familiaris OX=9615 GN=WDR1 PE=4 SV=3	C_familiaris	21	53	1
High	A0A5F4DAK7	Uncharacterized protein OS=Canis lupus familiaris OX=9615 GN=LOC609402 PE=3 SV=1	C_familiaris	10	193	1
High	A0A5F4CP02	Pyruvate kinase OS=Canis lupus familiaris OX=9615 GN=PKM PE=3 SV=1	C_familiaris	16	37	1
High	J9P7A6	Fructose-bisphosphate aldolase OS=Canis lupus familiaris OX=9615 GN=ALDOA PE=3 SV=2	C_familiaris	17	59	1
High	A0A5F4DC86	Actinin alpha 4 OS=Canis lupus familiaris OX=9615 GN=ACTN4 PE=4 SV=1	C_familiaris	20	50	1
High	A0A5F4C2N3	Kininogen 1 OS=Canis lupus familiaris OX=9615 GN=KNG1 PE=4 SV=1	C_familiaris	16	62	1
High	A0A5F4CYB6	Pyruvate kinase OS=Canis lupus familiaris OX=9615 GN=PKM PE=3 SV=1	C_familiaris	16	35	1
High	F2Z4N7	Actin alpha cardiac muscle 1 OS=Canis lupus familiaris OX=9615 GN=ACTC1 PE=3 SV=2	C_familiaris	10	134	1
High	H9GWR8	Uncharacterized protein OS=Canis lupus familiaris OX=9615 PE=4 SV=2	C_familiaris	6	131	1
High	J9NSQ1	Ig-like domain-containing protein OS=Canis lupus familiaris OX=9615 PE=4 SV=2	C_familiaris	6	126	1
High	J9P6L3	Ig-like domain-containing protein OS=Canis lupus familiaris OX=9615 PE=4 SV=2	C_familiaris	4	65	1
High	A0A5F4D8U5	Actin beta like 2 OS=Canis lupus familiaris OX=9615 GN=ACTBL2 PE=3 SV=1	C_familiaris	7	99	1
High	E2RJW9	Adducin 1 OS=Canis lupus familiaris OX=9615 GN=ADD1 PE=3 SV=3	C_familiaris	13	32	1
High	A0A5F4D0K4	Bridging integrator 2 OS=Canis lupus familiaris OX=9615 GN=BIN2 PE=4 SV=1	C_familiaris	14	38	1
High	L7N0F1	Ig-like domain-containing protein OS=Canis lupus familiaris OX=9615 GN=LOC100687054 PE=4 SV=1	C_familiaris	5	74	1
High	A0A5F4BWC4	Ig-like domain-containing protein OS=Canis lupus familiaris OX=9615 PE=4 SV=1	C_familiaris	5	105	1
High	A0A5F4CSF0	Ig-like domain-containing protein OS=Canis lupus familiaris OX=9615 PE=4 SV=1	C_familiaris	5	109	1
High	J9PAX5	Ig-like domain-containing protein OS=Canis lupus familiaris OX=9615 PE=4 SV=2	C_familiaris	2	100	1
High	P62490	Ras-related protein Rab-11A OS=Canis lupus familiaris OX=9615 GN=RAB11A PE=2 SV=3	C_familiaris	10	27	1
High	A0A5F4D567	Uncharacterized protein OS=Canis lupus familiaris OX=9615 PE=3 SV=1	C_familiaris	6	16	1
High	A0A5F4BR98	Ig-like domain-containing protein OS=Canis lupus familiaris OX=9615 PE=4 SV=1	C_familiaris	4	106	1
High	A0A5F4CUQ1	Tropomyosin 1 OS=Canis lupus familiaris OX=9615 GN=TPM1 PE=3 SV=1	C_familiaris	8	21	1
High	A0A5F4CKL2	Ig-like domain-containing protein OS=Canis lupus familiaris OX=9615 PE=4 SV=1	C_familiaris	3	57	1
High	J9NY02	Ig-like domain-containing protein OS=Canis lupus familiaris OX=9615 PE=4 SV=2	C_familiaris	3	98	1
High	J9NZT2	Ig-like domain-containing protein OS=Canis lupus familiaris OX=9615 PE=4 SV=2	C_familiaris	3	100	1
High	L7N049	DLA class I alpha chain OS=Canis lupus familiaris OX=9615 GN=DLA88 PE=3 SV=2	C_familiaris	4	12	1
High	A0A5F4C493	Ig-like domain-containing protein OS=Canis lupus familiaris OX=9615 PE=4 SV=1	C_familiaris	3	18	1
High	A0A5F4DCY9	Ig-like domain-containing protein OS=Canis lupus familiaris OX=9615 PE=4 SV=1	C_familiaris	3	16	1
High	F1PE31	IGc1 domain-containing protein OS=Canis lupus familiaris OX=9615 GN=DLA88 PE=3 SV=3	C_familiaris	4	13	1
High	E2RF52	Proteasome subunit alpha type OS=Canis lupus familiaris OX=9615 GN=PSMA8 PE=3 SV=2	C_familiaris	4	11	1
High	A0A5F4CPW0	Tyrosine 3-monooxygenase/tryptophan 5-monooxygenase activation protein epsilon OS=Canis lupus familiaris OX=9615 GN=YWHAE PE=3 SV=1	C_familiaris	3	7	1
High	J9NTU0	Gp_dh_N domain-containing protein OS=Canis lupus familiaris OX=9615 PE=3 SV=1	C_familiaris	4	20	1
High	A0A5F4DI47	Septin 11 OS=Canis lupus familiaris OX=9615 GN=SEPTIN11 PE=3 SV=1	C_familiaris	6	10	1
High	F1PL63	Fructose-bisphosphate aldolase OS=Canis lupus familiaris OX=9615 GN=ALDOC PE=3 SV=1	C_familiaris	3	13	1
High	A0A5F4CVC3	G protein subunit beta 4 OS=Canis lupus familiaris OX=9615 GN=GNB4 PE=3 SV=1	C_familiaris	5	12	1
High	A0A5F4CSD5	Ig-like domain-containing protein OS=Canis lupus familiaris OX=9615 PE=4 SV=1	C_familiaris	2	42	1
High	A0A5F4BZA4	Microfibril associated protein 4 OS=Canis lupus familiaris OX=9615 GN=MFAP4 PE=4 SV=1	C_familiaris	1	3	1
High	A0A5F4D172	Ig-like domain-containing protein OS=Canis lupus familiaris OX=9615 PE=4 SV=1	C_familiaris	1	9	1
High	J9NRH5	Tyrosine 3-monooxygenase/tryptophan 5-monooxygenase activation protein gamma OS=Canis lupus familiaris OX=9615 GN=YWHAG PE=3 SV=2	C_familiaris	3	7	1
High	J9P932	Nucleoside diphosphate kinase OS=Canis lupus familiaris OX=9615 PE=3 SV=2	C_familiaris	4	11	1
High	Q8MJ46	Serine/threonine-protein phosphatase PP1-gamma catalytic subunit OS=Canis lupus familiaris OX=9615 GN=PPP1CC PE=2 SV=1	C_familiaris	4	6	1
High	F1PFK6	Importin subunit alpha OS=Canis lupus familiaris OX=9615 GN=KPNA1 PE=3 SV=2	C_familiaris	3	4	1
High	F1PM77	Importin subunit alpha OS=Canis lupus familiaris OX=9615 GN=KPNA6 PE=3 SV=2	C_familiaris	3	4	1
High	A0A5F4BSZ6	Chaperonin containing TCP1 subunit 6B OS=Canis lupus familiaris OX=9615 GN=CCT6B PE=3 SV=1	C_familiaris	3	6	1
High	F1PPL6	Ras-related protein Rap-2 OS=Canis lupus familiaris OX=9615 GN=RAP2C PE=3 SV=2	C_familiaris	2	5	1
High	J9P4X0	Nucleosome assembly protein 1 like 4 OS=Canis lupus familiaris OX=9615 GN=NAP1L4 PE=3 SV=2	C_familiaris	2	7	1
High	L7N0D0	Serine/threonine-protein phosphatase OS=Canis lupus familiaris OX=9615 GN=PPP1CA PE=3 SV=1	C_familiaris	4	6	1
High	A0A5F4CBH6	Ig-like domain-containing protein OS=Canis lupus familiaris OX=9615 PE=4 SV=1	C_familiaris	2	7	1
High	J9P6K0	Ras-related protein Rap-2 OS=Canis lupus familiaris OX=9615 GN=RAP2A PE=3 SV=2	C_familiaris	2	4	1
High	E2RJH1	Rac family small GTPase 2 OS=Canis lupus familiaris OX=9615 GN=RAC2 PE=4 SV=2	C_familiaris	3	8	1
High	P01784	Ig heavy chain V region GOM OS=Canis lupus familiaris OX=9615 PE=1 SV=1	C_familiaris	2	5	1
High	J9P3F4	Stum, mechanosensory transduction mediator homolog OS=Canis lupus familiaris OX=9615 GN=STUM PE=4 SV=2	C_familiaris	1	5	1
High	J9P4B9	RAB6B, member RAS oncogene family OS=Canis lupus familiaris OX=9615 GN=RAB6B PE=4 SV=2	C_familiaris	3	11	1
High	F1PNP7	EH domain containing 2 OS=Canis lupus familiaris OX=9615 GN=EHD2 PE=4 SV=3	C_familiaris	3	6	1
High	E2RHG2	Peroxiredoxin-1 OS=Canis lupus familiaris OX=9615 GN=PRDX1 PE=3 SV=2	C_familiaris	3	7	1
High	E2R3K1	Tr-type G domain-containing protein OS=Canis lupus familiaris OX=9615 GN=LOC102153873 PE=3 SV=1	C_familiaris	4	10	1
High	A0A5K1U2R9	Solute carrier family 2 member 8 OS=Canis lupus familiaris OX=9615 GN=SLC2A8 PE=3 SV=1	C_familiaris	1	2	1
High	A0A5F4DLE0	Ig-like domain-containing protein OS=Canis lupus familiaris OX=9615 PE=4 SV=1	C_familiaris	2	6	1
High	A0A5F4BNY8	Thrombospondin 3 OS=Canis lupus familiaris OX=9615 GN=THBS3 PE=3 SV=1	C_familiaris	3	5	1
High	J9NST4	SelP_N domain-containing protein OS=Canis lupus familiaris OX=9615 GN=SELENOP PE=4 SV=2	C_familiaris	1	2	1
High	D5IGC7	Glycoprotein IIIb OS=Canis lupus familiaris OX=9615 GN=CD36 PE=3 SV=1	C_familiaris	1	4	1
High	F1PB66	Tetraspanin OS=Canis lupus familiaris OX=9615 GN=CD81 PE=3 SV=2	C_familiaris	1	3	1
High	F1PAY4	TNF alpha induced protein 8 OS=Canis lupus familiaris OX=9615 GN=TNFAIP8 PE=4 SV=2	C_familiaris	1	2	1
High	A0A5F4DIN5	Calcium binding protein 39 like OS=Canis lupus familiaris OX=9615 GN=CAB39L PE=3 SV=1	C_familiaris	2	3	1
High	P02727	Glycophorin-A OS=Canis lupus familiaris OX=9615 GN=GYPA PE=1 SV=3	C_familiaris	1	1	1
High	J9NY79	Malate dehydrogenase OS=Canis lupus familiaris OX=9615 PE=3 SV=2	C_familiaris	1	1	1
High	E2RKJ6	Serpin family B member 1 OS=Canis lupus familiaris OX=9615 GN=SERPINB1 PE=3 SV=1	C_familiaris	1	2	1
High	F1PV58	Importin subunit alpha OS=Canis lupus familiaris OX=9615 GN=KPNA3 PE=3 SV=3	C_familiaris	3	4	1
High	A0A5F4BZ45	RAB35, member RAS oncogene family OS=Canis lupus familiaris OX=9615 GN=RAB35 PE=4 SV=1	C_familiaris	2	11	1
High	F1PF90	Ig-like domain-containing protein OS=Canis lupus familiaris OX=9615 PE=4 SV=3	C_familiaris	1	4	1
High	A0A5F4C6Q3	Amine oxidase OS=Canis lupus familiaris OX=9615 GN=AOC3 PE=3 SV=1	C_familiaris	1	1	1
High	A0A5F4CGR9	Ig-like domain-containing protein OS=Canis lupus familiaris OX=9615 PE=4 SV=1	C_familiaris	1	2	1
High	E2RC89	Glyceraldehyde-3-phosphate dehydrogenase OS=Canis lupus familiaris OX=9615 GN=GAPDHS PE=3 SV=1	C_familiaris	2	5	1
High	E2RRY7	OMPdecase OS=Canis lupus familiaris OX=9615 GN=UMPS PE=3 SV=1	C_familiaris	1	2	1
High	Q8WNN6	Superoxide dismutase [Cu-Zn] OS=Canis lupus familiaris OX=9615 GN=SOD1 PE=2 SV=1	C_familiaris	2	4	1
High	A0A0B4J195	Aspartate aminotransferase OS=Canis lupus familiaris OX=9615 GN=GOT1 PE=3 SV=1	C_familiaris	1	3	1
High	P81709	Lysozyme C, spleen isozyme OS=Canis lupus familiaris OX=9615 PE=1 SV=1	C_familiaris	1	2	1
High	E2R0X8	Mediator of ErbB2-driven cell motility 1 OS=Canis lupus familiaris OX=9615 GN=MEMO1 PE=3 SV=3	C_familiaris	1	1	1
High	F1P9A7	Protein tweety homolog OS=Canis lupus familiaris OX=9615 GN=TTYH3 PE=3 SV=3	C_familiaris	1	2	1
High	E2QTP7	Ras-related protein Rab-4 OS=Canis lupus familiaris OX=9615 GN=RAB4A PE=3 SV=1	C_familiaris	2	10	1
High	A0A5F4CI17	Ig-like domain-containing protein OS=Canis lupus familiaris OX=9615 PE=4 SV=1	C_familiaris	1	5	1
High	J9P922	Cytochrome b reductase 1 OS=Canis lupus familiaris OX=9615 GN=CYBRD1 PE=4 SV=2	C_familiaris	1	2	1
High	F6XKC0	Complement C8 gamma chain OS=Canis lupus familiaris OX=9615 GN=C8G PE=3 SV=2	C_familiaris	1	2	1
High	F1P6B7	Annexin OS=Canis lupus familiaris OX=9615 GN=ANXA1 PE=3 SV=1	C_familiaris	1	1	1
High	F1PZ37	MARVEL domain-containing protein OS=Canis lupus familiaris OX=9615 PE=3 SV=3	C_familiaris	1	2	1
High	E2R974	Adipocyte-type fatty acid-binding protein OS=Canis lupus familiaris OX=9615 GN=FABP4 PE=3 SV=1	C_familiaris	1	2	1
High	A0A5F4DH19	Mucin 13, cell surface associated OS=Canis lupus familiaris OX=9615 GN=MUC13 PE=4 SV=1	C_familiaris	1	2	1
High	A0A5F4CLU1	Superoxide dismutase [Cu-Zn] OS=Canis lupus familiaris OX=9615 GN=SOD1 PE=3 SV=1	C_familiaris	2	4	1
High	L7N0E7	Uncharacterized protein OS=Canis lupus familiaris OX=9615 PE=4 SV=2	C_familiaris	1	1	1
High	A0A5F4DKK4	Secretory carrier-associated membrane protein OS=Canis lupus familiaris OX=9615 GN=SCAMP1 PE=3 SV=1	C_familiaris	1	2	1
High	A0A5F4BRI8	Protein transport protein SEC23 OS=Canis lupus familiaris OX=9615 GN=SEC23B PE=3 SV=1	C_familiaris	1	2	1
High	E2R0K3	Copine 3 OS=Canis lupus familiaris OX=9615 GN=CPNE3 PE=3 SV=2	C_familiaris	1	3	1
High	F1Q4I3	MARVEL domain-containing protein OS=Canis lupus familiaris OX=9615 PE=4 SV=3	C_familiaris	1	2	1
High	E2QXY0	Phosphoprotein membrane anchor with glycosphingolipid microdomains 1 OS=Canis lupus familiaris OX=9615 GN=PAG1 PE=4 SV=1	C_familiaris	1	1	1
High	J9NUZ6	Peptidyl-prolyl cis-trans isomerase OS=Canis lupus familiaris OX=9615 GN=PPIC PE=3 SV=2	C_familiaris	1	1	1
High	A0A5F4CUP4	Uncharacterized protein OS=Canis lupus familiaris OX=9615 GN=SVIP PE=4 SV=1	C_familiaris	1	1	1
High	F1PMQ2	Transforming growth factor beta-1 OS=Canis lupus familiaris OX=9615 GN=TGFB1 PE=3 SV=3	C_familiaris	1	2	1
High	J9P8W8	Uncharacterized protein OS=Canis lupus familiaris OX=9615 PE=4 SV=2	C_familiaris	2	4	1
High	E2RMK6	Protein-synthesizing GTPase OS=Canis lupus familiaris OX=9615 GN=EIF2S3 PE=4 SV=1	C_familiaris	1	1	1
High	E2RD65	Actin-related protein 2/3 complex subunit 5 OS=Canis lupus familiaris OX=9615 GN=ARPC5 PE=3 SV=3	C_familiaris	1	2	1
High	J9P3L5	Ig-like domain-containing protein OS=Canis lupus familiaris OX=9615 PE=4 SV=2	C_familiaris	1	5	1
High	J9NZQ3	V-type proton ATPase subunit G OS=Canis lupus familiaris OX=9615 PE=3 SV=2	C_familiaris	1	2	1
High	F1P8F6	Syntaxin 11 OS=Canis lupus familiaris OX=9615 GN=STX11 PE=3 SV=3	C_familiaris	1	2	1
High	F1P795	RAS guanyl releasing protein 2 OS=Canis lupus familiaris OX=9615 GN=RASGRP2 PE=3 SV=2	C_familiaris	1	1	1
High	A0A5F4CYS8	AA_permease_C domain-containing protein OS=Canis lupus familiaris OX=9615 PE=4 SV=1	C_familiaris	2	4	1
High	E2REU6	IF rod domain-containing protein OS=Canis lupus familiaris OX=9615 GN=KRT18 PE=3 SV=3	C_familiaris	2	6	1
High	L7N0C2	Uncharacterized protein OS=Canis lupus familiaris OX=9615 PE=4 SV=2	C_familiaris	1	2	1
High	F1PGD4	Neural EGFL like 2 OS=Canis lupus familiaris OX=9615 GN=NELL2 PE=4 SV=3	C_familiaris	1	1	1
High	J9P2Y0	GABA type A receptor associated protein like 2 OS=Canis lupus familiaris OX=9615 GN=GABARAPL2 PE=3 SV=1	C_familiaris	1	2	1
High	A0A5F4DCI7	TR_THY domain-containing protein OS=Canis lupus familiaris OX=9615 PE=4 SV=1	C_familiaris	1	3	1
High	A0A5F4C9D6	Flotillin OS=Canis lupus familiaris OX=9615 GN=DHRS13 PE=3 SV=1	C_familiaris	1	2	1
High	J9NWJ5	Thioredoxin OS=Canis lupus familiaris OX=9615 PE=3 SV=2	C_familiaris	1	1	1
High	F1PRZ1	Voltage-dependent anion-selective channel protein 1 OS=Canis lupus familiaris OX=9615 GN=VDAC1 PE=3 SV=2	C_familiaris	2	3	1
High	F6XYD3	FYN binding protein 1 OS=Canis lupus familiaris OX=9615 GN=FYB1 PE=4 SV=2	C_familiaris	1	2	1
High	A0A5F4CYD3	10 kDa heat shock protein, mitochondrial OS=Canis lupus familiaris OX=9615 GN=COQ10B PE=3 SV=1	C_familiaris	1	1	1
High	A0A5F4CYQ6	Ubiquitinyl hydrolase 1 OS=Canis lupus familiaris OX=9615 GN=USP11 PE=4 SV=1	C_familiaris	2	3	1
High	F1PTG8	Trifunctional purine biosynthetic protein adenosine-3 OS=Canis lupus familiaris OX=9615 GN=LOC100856570 PE=3 SV=3	C_familiaris	1	1	1
High	F1PZU7	Uncharacterized protein OS=Canis lupus familiaris OX=9615 GN=LRRC57 PE=4 SV=2	C_familiaris	1	1	1
High	J9P7C6	Podocalyxin OS=Canis lupus familiaris OX=9615 GN=PODXL PE=3 SV=2	C_familiaris	1	2	1
High	A0A5F4CXV1	Sodium- and chloride-dependent glycine transporter 1 OS=Canis lupus familiaris OX=9615 GN=SLC6A9 PE=3 SV=1	C_familiaris	1	1	1
High	F1PBA0	Uncharacterized protein OS=Canis lupus familiaris OX=9615 GN=CD58 PE=4 SV=3	C_familiaris	1	2	1
High	A0A5F4CYV2	Succinate dehydrogenase [ubiquinone] flavoprotein subunit, mitochondrial OS=Canis lupus familiaris OX=9615 GN=SDHA PE=3 SV=1	C_familiaris	1	1	1
High	E2RFJ3	Solute carrier family 40 protein OS=Canis lupus familiaris OX=9615 GN=SLC40A1 PE=3 SV=2	C_familiaris	1	2	1
High	A0A5F4CE33	Triggering receptor expressed on myeloid cells 2 OS=Canis lupus familiaris OX=9615 GN=TREM2 PE=4 SV=1	C_familiaris	1	3	1
High	A0A5F4C8U2	Major histocompatibility complex, class II, DQ beta 2 OS=Canis lupus familiaris OX=9615 GN=HLA-DQB2 PE=4 SV=1	C_familiaris	1	1	1
High	A0A5F4BSJ2	J domain-containing protein OS=Canis lupus familiaris OX=9615 PE=4 SV=1	C_familiaris	1	2	1
High	E2R9R5	Peptidylprolyl isomerase OS=Canis lupus familiaris OX=9615 GN=FKBP2 PE=4 SV=3	C_familiaris	1	2	1
High	F6XEV4	Uncharacterized protein OS=Canis lupus familiaris OX=9615 PE=4 SV=2	C_familiaris	1	1	1
High	A0A5F4DD46	Protein tyrosine phosphatase 4A2 OS=Canis lupus familiaris OX=9615 GN=PTP4A2 PE=4 SV=1	C_familiaris	1	2	1
High	E2RMQ5	CD200 molecule OS=Canis lupus familiaris OX=9615 GN=CD200 PE=4 SV=3	C_familiaris	1	1	1
High	A0A5F4CJR2	Hypoxia up-regulated 1 OS=Canis lupus familiaris OX=9615 GN=HYOU1 PE=3 SV=1	C_familiaris	1	1	1
High	E2R8C5	Ig-like domain-containing protein OS=Canis lupus familiaris OX=9615 PE=4 SV=2	C_familiaris	1	3	1
High	A0A5F4DAV6	ATP binding cassette subfamily C member 4 OS=Canis lupus familiaris OX=9615 GN=ABCC4 PE=4 SV=1	C_familiaris	1	1	1
High	A0A5F4BVX6	Acyl-CoA thioesterase 7 OS=Canis lupus familiaris OX=9615 GN=ACOT7 PE=4 SV=1	C_familiaris	1	2	1
High	E2QWG2	F2R like thrombin or trypsin receptor 3 OS=Canis lupus familiaris OX=9615 GN=F2RL3 PE=3 SV=2	C_familiaris	1	1	1
High	A0A5F4DI49	Diadenosine tetraphosphate synthetase OS=Canis lupus familiaris OX=9615 GN=GARS1 PE=3 SV=1	C_familiaris	1	2	1
High	E2RM35	Pyrroline-5-carboxylate reductase OS=Canis lupus familiaris OX=9615 GN=PYCR3 PE=3 SV=2	C_familiaris	1	1	1
High	Q5WR09	V-type proton ATPase subunit G 1 OS=Canis lupus familiaris OX=9615 GN=ATP6V1G1 PE=3 SV=3	C_familiaris	1	1	1
High	E2R9N5	RNA binding motif protein 12 OS=Canis lupus familiaris OX=9615 GN=RBM12 PE=3 SV=2	C_familiaris	1	1	1
High	A0A5F4CPI7	Heterogeneous nuclear ribonucleoproteins A2/B1 OS=Canis lupus familiaris OX=9615 GN=HNRNPA2B1 PE=4 SV=1	C_familiaris	1	1	1
High	A0A5F4BS98	Acetyl-CoA carboxylase kinase OS=Canis lupus familiaris OX=9615 GN=PRKAA1 PE=3 SV=1	C_familiaris	1	2	1
High	A0A5F4BZF0	Ubiquinol-cytochrome c reductase core protein 2 OS=Canis lupus familiaris OX=9615 GN=UQCRC2 PE=3 SV=1	C_familiaris	1	2	1
High	A0A5F4CUH8	Golgi membrane protein 1 OS=Canis lupus familiaris OX=9615 GN=GOLM1 PE=3 SV=1	C_familiaris	1	1	1
High	A0A5F4D9U3	Late endosomal/lysosomal adaptor and MAPK and MTOR activator 4 OS=Canis lupus familiaris OX=9615 GN=LAMTOR4 PE=3 SV=1	C_familiaris	1	2	1
High	F1Q406	T-complex protein 1 subunit eta OS=Canis lupus familiaris OX=9615 GN=CCT7 PE=3 SV=2	C_familiaris	1	1	1
High	F1PJ67	Chloride channel protein OS=Canis lupus familiaris OX=9615 GN=CLCN2 PE=3 SV=2	C_familiaris	1	1	1
High	A0A5F4D858	cAMP-dependent protein kinase OS=Canis lupus familiaris OX=9615 GN=PRKACB PE=3 SV=1	C_familiaris	1	2	1
High	A0A5F4DFV6	Fc receptor like 4 OS=Canis lupus familiaris OX=9615 GN=FCRL4 PE=4 SV=1	C_familiaris	1	3	1
High	E2RR68	Niban apoptosis regulator 2 OS=Canis lupus familiaris OX=9615 GN=NIBAN2 PE=3 SV=1	C_familiaris	1	1	1
High	E2RLY5	Cysteinylglycine-S-conjugate dipeptidase OS=Canis lupus familiaris OX=9615 GN=LAP3 PE=3 SV=2	C_familiaris	1	1	1
High	F1PAP9	RuvB-like helicase OS=Canis lupus familiaris OX=9615 GN=RUVBL2 PE=3 SV=3	C_familiaris	1	2	1
High	A0A5F4CBH8	Synaptotagmin like 2 OS=Canis lupus familiaris OX=9615 GN=SYTL2 PE=4 SV=1	C_familiaris	1	1	1
High	F1PUY6	Meprin A subunit OS=Canis lupus familiaris OX=9615 GN=MEP1A PE=4 SV=2	C_familiaris	1	1	1
High	F6UX32	Protein numb homolog OS=Canis lupus familiaris OX=9615 GN=NUMB PE=4 SV=2	C_familiaris	1	1	1
High	E2RD70	COP9 signalosome complex subunit 3 OS=Canis lupus familiaris OX=9615 GN=COPS3 PE=3 SV=1	C_familiaris	1	2	1
High	E2QUZ2	Tetraspanin OS=Canis lupus familiaris OX=9615 GN=CD53 PE=3 SV=1	C_familiaris	1	1	1
High	P02677	Fibrinogen beta chain (Fragment) OS=Canis lupus familiaris OX=9615 GN=FGB PE=1 SV=2	C_familiaris	1	6	1
High	E2R0D2	Scavenger receptor cysteine rich family member with 5 domains OS=Canis lupus familiaris OX=9615 GN=SSC5D PE=4 SV=3	C_familiaris	1	1	1
High	J9PB28	Fibrinogen like 2 OS=Canis lupus familiaris OX=9615 GN=FGL2 PE=4 SV=1	C_familiaris	1	1	1
High	A0A5F4CA83	LRR binding FLII interacting protein 2 OS=Canis lupus familiaris OX=9615 GN=LRRFIP2 PE=3 SV=1	C_familiaris	1	1	1
High	E2RLN5	AP complex subunit sigma OS=Canis lupus familiaris OX=9615 GN=AP1S1 PE=3 SV=2	C_familiaris	1	1	1
High	A0A5F4C880	UBC core domain-containing protein OS=Canis lupus familiaris OX=9615 PE=3 SV=1	C_familiaris	1	2	1
High	A0A5F4D0H1	Sorting nexin OS=Canis lupus familiaris OX=9615 GN=SNX9 PE=3 SV=1	C_familiaris	1	1	1
High	F1PVC0	Glycogenin 1 OS=Canis lupus familiaris OX=9615 GN=GYG1 PE=4 SV=3	C_familiaris	1	1	1
High	A0A5F4D0B9	EGF containing fibulin extracellular matrix protein 1 OS=Canis lupus familiaris OX=9615 GN=EFEMP1 PE=4 SV=1	C_familiaris	1	1	1
High	F1Q0B2	MOB kinase activator 1B OS=Canis lupus familiaris OX=9615 GN=MOB1B PE=4 SV=3	C_familiaris	1	2	1
High	E2RSX8	Latexin OS=Canis lupus familiaris OX=9615 GN=LXN PE=3 SV=1	C_familiaris	1	3	1
High	E2R2A4	Purine rich element binding protein A OS=Canis lupus familiaris OX=9615 GN=PURA PE=3 SV=3	C_familiaris	1	1	1
High	A0A5F4CH63	Ig-like domain-containing protein OS=Canis lupus familiaris OX=9615 PE=4 SV=1	C_familiaris	1	4	1
High	J9P8N1	STAM binding protein OS=Canis lupus familiaris OX=9615 GN=STAMBP PE=3 SV=2	C_familiaris	1	2	1
High	A0A5F4DJ40	Prohibitin OS=Canis lupus familiaris OX=9615 GN=PHB2 PE=3 SV=1	C_familiaris	1	1	1
High	A0A5F4CTV8	Eukaryotic translation initiation factor 4C OS=Canis lupus familiaris OX=9615 GN=EIF1AX PE=3 SV=1	C_familiaris	1	2	1
High	A0A5F4CE93	IGv domain-containing protein OS=Canis lupus familiaris OX=9615 PE=4 SV=1	C_familiaris	1	1	1
High	E2RA67	C-C motif chemokine OS=Canis lupus familiaris OX=9615 GN=CCL14 PE=3 SV=2	C_familiaris	1	2	1
High	F1PSC4	ELAV-like protein OS=Canis lupus familiaris OX=9615 GN=ELAVL1 PE=3 SV=3	C_familiaris	1	2	1
High	A0A5F4C799	Proteasome subunit alpha 4 OS=Canis lupus familiaris OX=9615 GN=PSMA4 PE=4 SV=1	C_familiaris	1	4	1
High	E2R580	VAMP associated protein A OS=Canis lupus familiaris OX=9615 GN=VAPA PE=4 SV=1	C_familiaris	1	1	1
High	E2QV12	Phosphoglucomutase 2 OS=Canis lupus familiaris OX=9615 GN=PGM2 PE=3 SV=1	C_familiaris	1	1	1
High	F1PU32	Non-specific serine/threonine protein kinase OS=Canis lupus familiaris OX=9615 GN=MAPKAPK3 PE=3 SV=3	C_familiaris	1	1	1
High	J9NZJ6	Phosphatidylinositol binding clathrin assembly protein OS=Canis lupus familiaris OX=9615 GN=PICALM PE=3 SV=1	C_familiaris	1	1	1
High	F1PTR6	Ig-like domain-containing protein OS=Canis lupus familiaris OX=9615 GN=DLA-DQA1 PE=3 SV=3	C_familiaris	1	1	1
High	Q5PU49	Protein kinase C delta type OS=Canis lupus familiaris OX=9615 GN=PRKCD PE=2 SV=1	C_familiaris	1	2	1
High	E2QWG8	Eukaryotic translation initiation factor 3 subunit M OS=Canis lupus familiaris OX=9615 GN=EIF3M PE=3 SV=1	C_familiaris	1	1	1
High	P00011	Cytochrome c OS=Canis lupus familiaris OX=9615 GN=CYCS PE=1 SV=2	C_familiaris	1	2	1
High	E2R1R6	Synapse defective Rho GTPase homolog 1 OS=Canis lupus familiaris OX=9615 GN=SYDE1 PE=4 SV=2	C_familiaris	1	2	1
High	E2RJW5	Inositol-3-phosphate synthase 1 OS=Canis lupus familiaris OX=9615 GN=ELL PE=3 SV=3	C_familiaris	1	1	1
High	A0A5F4C9U8	Tyrosine-protein kinase OS=Canis lupus familiaris OX=9615 GN=BTK PE=3 SV=1	C_familiaris	1	2	1
High	F1PRB9	Membrane associated ring-CH-type finger 8 OS=Canis lupus familiaris OX=9615 GN=MARCHF8 PE=4 SV=2	C_familiaris	1	3	1
High	A0A5F4CVA7	Myosin light chain, phosphorylatable, fast skeletal muscle OS=Canis lupus familiaris OX=9615 GN=MYLPF PE=4 SV=1	C_familiaris	1	1	1
High	F1PH98	Uncharacterized protein OS=Canis lupus familiaris OX=9615 GN=SLC7A5 PE=3 SV=3	C_familiaris	1	2	1
High	F1PKL6	Ig-like domain-containing protein OS=Canis lupus familiaris OX=9615 PE=4 SV=3	C_familiaris	1	3	1
High	E2RFE5	Sorting nexin-17 OS=Canis lupus familiaris OX=9615 GN=SNX17 PE=3 SV=2	C_familiaris	1	1	1
High	A0A5F4BT67	Alpha-centractin OS=Canis lupus familiaris OX=9615 GN=ACTR1A PE=3 SV=1	C_familiaris	1	3	1
High	E2RN45	G3BP stress granule assembly factor 1 OS=Canis lupus familiaris OX=9615 GN=G3BP1 PE=4 SV=2	C_familiaris	1	1	1
High	F1P9A3	Ferrochelatase OS=Canis lupus familiaris OX=9615 GN=FECH PE=3 SV=2	C_familiaris	1	2	1
High	E2R0A0	Peroxiredoxin-like 2 activated in M-CSF stimulated monocytes OS=Canis lupus familiaris OX=9615 GN=PRXL2A PE=3 SV=3	C_familiaris	1	1	1
High	E2RFY1	Transmembrane channel-like protein OS=Canis lupus familiaris OX=9615 GN=TMC8 PE=3 SV=2	C_familiaris	1	1	1
High	J9P5M2	Lymphocyte specific protein 1 OS=Canis lupus familiaris OX=9615 GN=LSP1 PE=4 SV=2	C_familiaris	1	1	1
High	F6UT80	Calcium homeostasis modulator family member 5 OS=Canis lupus familiaris OX=9615 GN=CALHM5 PE=3 SV=2	C_familiaris	1	1	1
High	Q3LSL6	C-X-C chemokine receptor type 4 OS=Canis lupus familiaris OX=9615 GN=CXCR4 PE=2 SV=1	C_familiaris	1	1	1
High	F1PI88	UDP-glucose 4-epimerase OS=Canis lupus familiaris OX=9615 GN=GALE PE=3 SV=3	C_familiaris	1	2	1
High	F1PBJ3	Uncharacterized protein OS=Canis lupus familiaris OX=9615 GN=LMNA PE=3 SV=2	C_familiaris	1	1	1
High	E2RTK6	Charged multivesicular body protein 1a OS=Canis lupus familiaris OX=9615 GN=CHMP1A PE=3 SV=1	C_familiaris	1	1	1
High	F1Q466	Acetyl-CoA acetyltransferase 2 OS=Canis lupus familiaris OX=9615 GN=ACAT2 PE=3 SV=2	C_familiaris	1	2	1
High	A0A5F4BWD6	T-complex protein 1 subunit delta OS=Canis lupus familiaris OX=9615 GN=CCT4 PE=3 SV=1	C_familiaris	1	1	1
High	E2RBJ5	Hydroxymethylbilane hydrolyase [cyclizing] OS=Canis lupus familiaris OX=9615 GN=UROS PE=3 SV=1	C_familiaris	1	1	1
High	J9NSQ6	Heparan sulfate proteoglycan 2 OS=Canis lupus familiaris OX=9615 GN=HSPG2 PE=4 SV=2	C_familiaris	1	1	1
High	J9NYJ6	TBC1 domain family member 15 OS=Canis lupus familiaris OX=9615 GN=TBC1D15 PE=4 SV=2	C_familiaris	1	1	1
High	A0A5F4DB26	Christmas factor OS=Canis lupus familiaris OX=9615 GN=F9 PE=4 SV=1	C_familiaris	1	1	1
High	J9P8S3	S100 calcium binding protein A8 OS=Canis lupus familiaris OX=9615 GN=S100A8 PE=4 SV=2	C_familiaris	1	2	1
High	A0A5F4BQ87	WW domain binding protein 2 OS=Canis lupus familiaris OX=9615 GN=WBP2 PE=4 SV=1	C_familiaris	1	2	1
High	F6Y591	UBX domain protein 6 OS=Canis lupus familiaris OX=9615 GN=UBXN6 PE=4 SV=2	C_familiaris	1	2	1
High	A0A5F4C5B7	SEC24 homolog C, COPII coat complex component OS=Canis lupus familiaris OX=9615 GN=SEC24C PE=3 SV=1	C_familiaris	1	1	1
High	Q863Z4	Myotrophin OS=Canis lupus familiaris OX=9615 GN=MTPN PE=3 SV=3	C_familiaris	1	1	1
High	F1PI77	Guanylate cyclase OS=Canis lupus familiaris OX=9615 GN=GUCY1A2 PE=3 SV=3	C_familiaris	1	6	1
High	E2R3J3	G protein subunit alpha z OS=Canis lupus familiaris OX=9615 GN=GNAZ PE=4 SV=1	C_familiaris	1	2	1
High	J9NU35	EF-hand calcium binding domain 5 OS=Canis lupus familiaris OX=9615 GN=EFCAB5 PE=4 SV=2	C_familiaris	1	3	1
High	F1PH61	Ig-like domain-containing protein OS=Canis lupus familiaris OX=9615 PE=4 SV=3	C_familiaris	1	3	1
High	B3RFJ1	ATP-binding cassette sub-family G member 2 OS=Canis lupus familiaris OX=9615 GN=ABCG2 PE=2 SV=1	C_familiaris	1	1	1
High	E2RJN2	Cathepsin E OS=Canis lupus familiaris OX=9615 GN=CTSE PE=3 SV=2	C_familiaris	1	2	1
High	E2R7Z7	Solute carrier family 38 member 3 OS=Canis lupus familiaris OX=9615 GN=SLC38A3 PE=4 SV=1	C_familiaris	1	2	1
High	E2RQC9	RuvB-like helicase OS=Canis lupus familiaris OX=9615 GN=RUVBL1 PE=3 SV=2	C_familiaris	1	2	1
High	F1PC03	IQ motif containing F1 OS=Canis lupus familiaris OX=9615 GN=IQCF1 PE=4 SV=2	C_familiaris	1	4	1
High	F1PA10	Phosphatidylinositol-5-phosphate 4-kinase type 2 gamma OS=Canis lupus familiaris OX=9615 GN=PIP4K2C PE=4 SV=2	C_familiaris	1	1	1
High	F1PDT7	AP-2 complex subunit alpha OS=Canis lupus familiaris OX=9615 GN=AP2A2 PE=3 SV=3	C_familiaris	1	1	1
High	A0A5F4D0A6	Aspartate--tRNA ligase, cytoplasmic OS=Canis lupus familiaris OX=9615 GN=DARS1 PE=3 SV=1	C_familiaris	1	1	1
High	J9P499	Non-specific serine/threonine protein kinase OS=Canis lupus familiaris OX=9615 GN=SLK PE=4 SV=1	C_familiaris	1	1	1
High	A0A5F4CXG7	CD84 molecule OS=Canis lupus familiaris OX=9615 GN=CD84 PE=4 SV=1	C_familiaris	1	2	1
High	A0A5F4C665	SH3 domain containing GRB2 like, endophilin B2 OS=Canis lupus familiaris OX=9615 GN=SH3GLB2 PE=4 SV=1	C_familiaris	1	1	1
High	A0A5F4D103	Fc fragment of IgE receptor II OS=Canis lupus familiaris OX=9615 GN=FCER2 PE=4 SV=1	C_familiaris	1	1	1
High	F1PIV1	Docking protein 3 OS=Canis lupus familiaris OX=9615 GN=DOK3 PE=3 SV=3	C_familiaris	1	2	1
High	A0A5F4DIW0	Sorting nexin 5 OS=Canis lupus familiaris OX=9615 GN=SNX5 PE=3 SV=1	C_familiaris	1	1	1
High	F6X4J2	Importin 7 OS=Canis lupus familiaris OX=9615 GN=IPO7 PE=4 SV=1	C_familiaris	1	1	1
High	A0A5F4BQ47	Phospholipid transfer protein OS=Canis lupus familiaris OX=9615 GN=PLTP PE=3 SV=1	C_familiaris	1	2	1
High	F1Q3S9	ATP-dependent 6-phosphofructokinase OS=Canis lupus familiaris OX=9615 GN=PFKL PE=3 SV=2	C_familiaris	1	2	1
High	E2QX19	Macrophage stimulating 1 OS=Canis lupus familiaris OX=9615 GN=MST1 PE=3 SV=3	C_familiaris	1	2	1
High	A0A5F4CIG0	KAT8 regulatory NSL complex subunit 1 OS=Canis lupus familiaris OX=9615 GN=KANSL1 PE=4 SV=1	C_familiaris	1	2	1
High	E2RQS7	Peptidylprolyl isomerase OS=Canis lupus familiaris OX=9615 GN=FKBP3 PE=4 SV=1	C_familiaris	1	1	1
High	F1PW12	Coproporphyrinogen oxidase OS=Canis lupus familiaris OX=9615 GN=CPOX PE=3 SV=3	C_familiaris	1	3	1
High	A0A5F4CY86	Sorting nexin 15 OS=Canis lupus familiaris OX=9615 GN=SNX15 PE=4 SV=1	C_familiaris	1	1	1
High	Q5QQ50	Xylosyltransferase 2 OS=Canis lupus familiaris OX=9615 GN=XYLT2 PE=2 SV=1	C_familiaris	1	7	1
High	A0A5F4BZM9	Family with sequence similarity 126 member A OS=Canis lupus familiaris OX=9615 GN=FAM126A PE=3 SV=1	C_familiaris	1	2	1
High	A0A5F4DIV0	Regulator of G protein signaling 3 OS=Canis lupus familiaris OX=9615 GN=RGS3 PE=4 SV=1	C_familiaris	1	2	1
High	J9P1V2	Xg glycoprotein OS=Canis lupus familiaris OX=9615 GN=XG PE=3 SV=2	C_familiaris	1	2	1
High	F1PR31	Collagen type VI alpha 3 chain OS=Canis lupus familiaris OX=9615 GN=COL6A3 PE=4 SV=3	C_familiaris	1	1	1
High	F1PCZ0	Septin-5 OS=Canis lupus familiaris OX=9615 GN=SEPTIN5 PE=3 SV=2	C_familiaris	1	2	1
High	J9P121	Ubiquitin carboxyl-terminal hydrolase OS=Canis lupus familiaris OX=9615 GN=MINDY1 PE=3 SV=2	C_familiaris	1	2	1
High	A0A5F4CYC0	V-type proton ATPase subunit H OS=Canis lupus familiaris OX=9615 GN=ATP6V1H PE=3 SV=1	C_familiaris	1	2	1
High	A0A5F4DA88	GDP-4-keto-6-deoxy-D-mannose-3,5-epimerase-4-reductase OS=Canis lupus familiaris OX=9615 GN=GFUS PE=3 SV=1	C_familiaris	1	1	1
High	F1PQ91	Insulin-like growth factor-binding protein 3 OS=Canis lupus familiaris OX=9615 GN=IGFBP3 PE=4 SV=2	C_familiaris	1	1	1
High	J9NU66	Low molecular weight cytosolic acid phosphatase OS=Canis lupus familiaris OX=9615 GN=ACP1 PE=3 SV=2	C_familiaris	1	1	1
High	F6UXI8	Inosine-5'-monophosphate dehydrogenase OS=Canis lupus familiaris OX=9615 GN=IMPDH2 PE=3 SV=2	C_familiaris	1	1	1
High	F1PGY4	26S proteasome regulatory subunit RPN11 OS=Canis lupus familiaris OX=9615 GN=PSMD14 PE=4 SV=2	C_familiaris	1	1	1
High	J9P9Z7	40S ribosomal protein S20 OS=Canis lupus familiaris OX=9615 GN=RPS20 PE=3 SV=1	C_familiaris	1	1	1
High	F1PFZ8	Serine/threonine-protein kinase 40 OS=Canis lupus familiaris OX=9615 GN=STK40 PE=3 SV=3	C_familiaris	1	3	1
High	F1PUB3	Heart development protein with EGF like domains 1 OS=Canis lupus familiaris OX=9615 GN=HEG1 PE=4 SV=3	C_familiaris	1	1	1
High	A0A5F4BQ86	AP-2 complex subunit mu OS=Canis lupus familiaris OX=9615 GN=AP2M1 PE=3 SV=1	C_familiaris	1	1	1
High	A0A5F4D8R7	ATP binding cassette subfamily A member 12 OS=Canis lupus familiaris OX=9615 GN=ABCA12 PE=4 SV=1	C_familiaris	1	1	1
High	A0A5F4D621	N-acetylglucosamine-1-phosphate transferase subunits alpha and beta OS=Canis lupus familiaris OX=9615 GN=GNPTAB PE=3 SV=1	C_familiaris	1	2	1
High	F1PYM4	Insulin like growth factor binding protein acid labile subunit OS=Canis lupus familiaris OX=9615 GN=IGFALS PE=4 SV=2	C_familiaris	1	2	1
High	E2REI7	Nuclear receptor binding protein 1 (Fragment) OS=Canis lupus familiaris OX=9615 GN=NRBP1 PE=4 SV=2	C_familiaris	1	1	1
High	A0A5F4BUL0	O-GlcNAc transferase subunit p110 OS=Canis lupus familiaris OX=9615 GN=OGT PE=3 SV=1	C_familiaris	1	1	1
High	E2RAX5	Epithelial membrane protein 3 OS=Canis lupus familiaris OX=9615 GN=EMP3 PE=3 SV=1	C_familiaris	1	1	1
High	A0A5S6CZU7	Vesicular integral-membrane protein VIP36 OS=Canis lupus familiaris OX=9615 GN=LMAN2 PE=4 SV=1	C_familiaris	1	1	1
High	E2R5F0	Intercellular adhesion molecule 2 OS=Canis lupus familiaris OX=9615 GN=ICAM2 PE=4 SV=2	C_familiaris	1	1	1
High	F1PJK0	F-box protein 15 OS=Canis lupus familiaris OX=9615 GN=FBXO15 PE=4 SV=3	C_familiaris	1	1	1
High	E2RAK7	Apolipoprotein A-II OS=Canis lupus familiaris OX=9615 GN=APOA2 PE=1 SV=2	C_familiaris	1	1	1
Medium	P28490	Calreticulin (Fragment) OS=Canis lupus familiaris OX=9615 GN=CALR PE=1 SV=1	C_familiaris	1	3	1
Medium	A0A5F4DB13	Amyloid beta precursor protein binding family B member 1 OS=Canis lupus familiaris OX=9615 GN=APBB1 PE=4 SV=1	C_familiaris	1	2	1
Medium	A0A5F4CU31	Voltage-dependent L-type calcium channel subunit alpha OS=Canis lupus familiaris OX=9615 GN=CACNA1D PE=3 SV=1	C_familiaris	1	1	1
Medium	A0A5F4C5P9	NIF3-like protein 1 OS=Canis lupus familiaris OX=9615 GN=NIF3L1 PE=3 SV=1	C_familiaris	1	1	1
Medium	F1PXF9	Hemicentin 1 OS=Canis lupus familiaris OX=9615 GN=HMCN1 PE=4 SV=2	C_familiaris	1	1	1
Medium	A0A5F4C451	Ig-like domain-containing protein OS=Canis lupus familiaris OX=9615 PE=4 SV=1	C_familiaris	1	1	1
Medium	A0A5F4CIY8	Uncharacterized protein OS=Canis lupus familiaris OX=9615 PE=3 SV=1	C_familiaris	1	2	1
Medium	E2QYS4	Pantetheinase OS=Canis lupus familiaris OX=9615 GN=VNN1 PE=3 SV=3	C_familiaris	1	1	1
Medium	E2RCP4	Uncharacterized protein OS=Canis lupus familiaris OX=9615 PE=4 SV=3	C_familiaris	1	1	1
Medium	E2QYD2	Electron transfer flavoprotein subunit beta OS=Canis lupus familiaris OX=9615 GN=ETFB PE=3 SV=2	C_familiaris	1	1	1
Medium	A0A5F4C144	Mitogen-activated protein kinase OS=Canis lupus familiaris OX=9615 GN=MAPK8 PE=3 SV=1	C_familiaris	1	1	1
Medium	F1Q3Z3	Solute carrier organic anion transporter family member OS=Canis lupus familiaris OX=9615 GN=SLCO6A1 PE=3 SV=2	C_familiaris	1	10	1
Medium	A0A5F4CFF9	Vascular endothelial growth factor receptor 3 OS=Canis lupus familiaris OX=9615 GN=FLT4 PE=3 SV=1	C_familiaris	1	1	1
Medium	A0A5F4C9B5	Plexin A1 OS=Canis lupus familiaris OX=9615 GN=PLXNA1 PE=3 SV=1	C_familiaris	1	1	1
Medium	J9JHE0	cGMP-dependent protein kinase OS=Canis lupus familiaris OX=9615 GN=PRKG1 PE=3 SV=2	C_familiaris	1	1	1
Medium	E2RFG2	Solute carrier family 35 member E4 OS=Canis lupus familiaris OX=9615 GN=SLC35E4 PE=4 SV=2	C_familiaris	1	2	1
Medium	A0A5F4BRB8	Family with sequence similarity 184 member A OS=Canis lupus familiaris OX=9615 GN=FAM184A PE=4 SV=1	C_familiaris	1	3	1
Medium	F1Q185	Ig-like domain-containing protein OS=Canis lupus familiaris OX=9615 PE=4 SV=3	C_familiaris	1	1	1
Medium	A0A5F4DF14	Phosphodiesterase 4D interacting protein OS=Canis lupus familiaris OX=9615 GN=PDE4DIP PE=4 SV=1	C_familiaris	1	2	1
Medium	J9P190	Mitogen-activated protein kinase 8 interacting protein 3 OS=Canis lupus familiaris OX=9615 GN=MAPK8IP3 PE=3 SV=2	C_familiaris	1	6	1
Medium	A0A5F4CVG3	LDLR chaperone MESD OS=Canis lupus familiaris OX=9615 GN=MESD PE=3 SV=1	C_familiaris	1	1	1
Medium	J9NWI6	Dynactin subunit 1 OS=Canis lupus familiaris OX=9615 GN=DCTN1 PE=3 SV=2	C_familiaris	1	1	1
Medium	E2R501	COP9 signalosome subunit 7B OS=Canis lupus familiaris OX=9615 GN=COPS7B PE=3 SV=1	C_familiaris	1	1	1
Medium	A0A5F4CFS5	URI1 prefoldin like chaperone OS=Canis lupus familiaris OX=9615 GN=URI1 PE=4 SV=1	C_familiaris	1	3	1
Medium	A0A5F4C2E2	Cullin 5 OS=Canis lupus familiaris OX=9615 GN=CUL5 PE=3 SV=1	C_familiaris	1	2	1
Medium	F1P6R6	AMP deaminase OS=Canis lupus familiaris OX=9615 GN=AMPD2 PE=3 SV=3	C_familiaris	1	2	1
Medium	A0A5F4CCP0	Myosin phosphatase Rho interacting protein OS=Canis lupus familiaris OX=9615 GN=MPRIP PE=4 SV=1	C_familiaris	1	3	1
Medium	A0A5F4C646	Interleukin-18 OS=Canis lupus familiaris OX=9615 GN=IL18 PE=3 SV=1	C_familiaris	1	1	1
Medium	F1PKL4	Signal peptide peptidase like 2A OS=Canis lupus familiaris OX=9615 GN=SPPL2A PE=3 SV=3	C_familiaris	1	1	1
Medium	F1Q0C1	DOP1 leucine zipper like protein A OS=Canis lupus familiaris OX=9615 GN=DOP1A PE=3 SV=3	C_familiaris	1	1	1
Medium	A0A5F4CVC4	Arginase OS=Canis lupus familiaris OX=9615 GN=ARG2 PE=3 SV=1	C_familiaris	1	6	1
Medium	A0A5F4DCN3	Plexin B3 OS=Canis lupus familiaris OX=9615 GN=PLXNB3 PE=3 SV=1	C_familiaris	1	1	1
Medium	J9P4Q3	Polycystin 1 like 3, transient receptor potential channel interacting OS=Canis lupus familiaris OX=9615 GN=PKD1L3 PE=3 SV=2	C_familiaris	1	1	1
Medium	E2RHX8	Solute carrier family 35 member G2 OS=Canis lupus familiaris OX=9615 GN=SLC35G2 PE=4 SV=1	C_familiaris	1	5	1
Medium	E2R5G4	Cell death inducing p53 target 1 OS=Canis lupus familiaris OX=9615 GN=CDIP1 PE=3 SV=1	C_familiaris	1	2	1
Medium	A0A5F4BWD4	Endonuclease domain containing 1 OS=Canis lupus familiaris OX=9615 GN=ENDOD1 PE=4 SV=1	C_familiaris	1	2	1
Medium	F1PRN4	Centrosomal protein 135 OS=Canis lupus familiaris OX=9615 GN=CEP135 PE=4 SV=3	C_familiaris	1	1	1
Medium	Q64H34	C-C chemokine receptor type 3 OS=Canis lupus familiaris OX=9615 GN=CCR3 PE=2 SV=1	C_familiaris	1	1	1
Medium	A0A5F4BPW3	Regulator of G protein signaling 6 OS=Canis lupus familiaris OX=9615 GN=RGS6 PE=4 SV=1	C_familiaris	1	1	1
Medium	J9PB64	Torsin 1A interacting protein 2 OS=Canis lupus familiaris OX=9615 GN=TOR1AIP2 PE=3 SV=1	C_familiaris	1	1	1
Medium	A0A5F4C6A4	Chromosome 20 open reading frame 27 OS=Canis lupus familiaris OX=9615 GN=C20orf27 PE=3 SV=1	C_familiaris	1	1	1
Medium	E2QTC7	Peptidylprolyl isomerase D OS=Canis lupus familiaris OX=9615 GN=PPID PE=4 SV=2	C_familiaris	1	1	1
Medium	E2QZQ9	Activating transcription factor 6 beta OS=Canis lupus familiaris OX=9615 GN=ATF6B PE=4 SV=3	C_familiaris	1	1	1
Medium	E2QW61	Lipopolysaccharide-binding protein OS=Canis lupus familiaris OX=9615 GN=LBP PE=3 SV=3	C_familiaris	1	1	1
Medium	J9P0X7	Coactosin like F-actin binding protein 1 OS=Canis lupus familiaris OX=9615 GN=COTL1 PE=4 SV=2	C_familiaris	1	1	1
Medium	A0A5F4DAP2	Uncharacterized protein OS=Canis lupus familiaris OX=9615 GN=PIK3R3 PE=3 SV=1	C_familiaris	1	1	1
Medium	E2R703	Importin 8 OS=Canis lupus familiaris OX=9615 GN=IPO8 PE=4 SV=2	C_familiaris	1	1	1
Medium	E2RDL0	Interleukin-1 receptor-associated kinase 4 OS=Canis lupus familiaris OX=9615 GN=IRAK4 PE=3 SV=3	C_familiaris	1	2	1
Medium	A0A5F4CDR4	Glutamate dehydrogenase (NAD(P)(+)) OS=Canis lupus familiaris OX=9615 PE=3 SV=1	C_familiaris	1	1	1
Medium	E2R0W1	WD repeat domain 66 OS=Canis lupus familiaris OX=9615 GN=CFAP251 PE=4 SV=3	C_familiaris	1	3	1
Medium	A0A5F4CFZ9	Cathelicidin antimicrobial peptide OS=Canis lupus familiaris OX=9615 GN=CAMP PE=3 SV=1	C_familiaris	1	2	1
Medium	J9NVT2	Hypoxanthine phosphoribosyltransferase OS=Canis lupus familiaris OX=9615 GN=HPRT1 PE=3 SV=1	C_familiaris	1	1	1
Medium	J9NYU7	X-ray repair cross complementing 5 OS=Canis lupus familiaris OX=9615 GN=XRCC5 PE=3 SV=1	C_familiaris	1	1	1
Medium	E2QZU1	Golgi apparatus membrane protein TVP23 homolog OS=Canis lupus familiaris OX=9615 GN=TVP23B PE=3 SV=3	C_familiaris	1	1	1
Medium	A0A5F4CLB4	Abraxas 2, BRISC complex subunit OS=Canis lupus familiaris OX=9615 GN=ABRAXAS2 PE=4 SV=1	C_familiaris	1	1	1
Medium	A0A5F4BX81	NEDD8-activating enzyme E1 regulatory subunit OS=Canis lupus familiaris OX=9615 GN=NAE1 PE=3 SV=1	C_familiaris	1	1	1
Medium	F1PFQ6	Maestro heat like repeat family member 2A OS=Canis lupus familiaris OX=9615 GN=MROH2A PE=4 SV=3	C_familiaris	1	2	1
Medium	A0A5F4D7X0	Centrosomal protein 164 OS=Canis lupus familiaris OX=9615 GN=CEP164 PE=4 SV=1	C_familiaris	1	4	1
Medium	E2RDN1	Phosphohydroxythreonine aminotransferase OS=Canis lupus familiaris OX=9615 GN=PSAT1 PE=3 SV=3	C_familiaris	1	1	1
Medium	F1PW86	Inositol 1,4,5-trisphosphate receptor type 1 OS=Canis lupus familiaris OX=9615 GN=ITPR1 PE=3 SV=3	C_familiaris	1	1	1
Medium	J9NY23	Late endosomal/lysosomal adaptor and MAPK and MTOR activator 3 OS=Canis lupus familiaris OX=9615 GN=LAMTOR3 PE=3 SV=1	C_familiaris	1	1	1
Medium	A0A5F4C585	Uncharacterized protein OS=Canis lupus familiaris OX=9615 PE=4 SV=1	C_familiaris	1	1	1
Medium	A0A5F4DEU6	Regulator of G protein signaling 22 OS=Canis lupus familiaris OX=9615 GN=RGS22 PE=4 SV=1	C_familiaris	1	1	1
Medium	E2R5N5	26S proteasome non-ATPase regulatory subunit 13 OS=Canis lupus familiaris OX=9615 GN=PSMD13 PE=3 SV=1	C_familiaris	1	1	1
Medium	A0A5F4CWY2	Quinoid dihydropteridine reductase OS=Canis lupus familiaris OX=9615 GN=QDPR PE=4 SV=1	C_familiaris	1	1	1
Medium	A0A5F4CPG5	Myosin binding protein C, fast type OS=Canis lupus familiaris OX=9615 GN=MYBPC2 PE=4 SV=1	C_familiaris	1	1	1
Medium	A0A5F4DC98	Zinc finger FYVE-type containing 19 OS=Canis lupus familiaris OX=9615 GN=ZFYVE19 PE=4 SV=1	C_familiaris	1	2	1
Medium	J9P0H8	Uncharacterized protein OS=Canis lupus familiaris OX=9615 PE=4 SV=2	C_familiaris	1	1	1
Medium	E2QZL5	Vacuolar protein sorting-associated protein 16 homolog OS=Canis lupus familiaris OX=9615 GN=VPS16 PE=3 SV=3	C_familiaris	1	1	1
Medium	A0A5F4D8P8	Isocitrate dehydrogenase [NADP] OS=Canis lupus familiaris OX=9615 GN=IDH2 PE=3 SV=1	C_familiaris	1	1	1
Medium	A0A5F4C477	Fibulin-1 OS=Canis lupus familiaris OX=9615 GN=FBLN1 PE=3 SV=1	C_familiaris	1	2	1
Medium	A0A5F4D9L6	Zinc finger C4H2-type containing OS=Canis lupus familiaris OX=9615 GN=ZC4H2 PE=4 SV=1	C_familiaris	1	2	1
Medium	A0A5F4BYT8	Uncharacterized protein OS=Canis lupus familiaris OX=9615 PE=4 SV=1	C_familiaris	1	1	1
Medium	A0A5F4D6S6	Vacuolar protein sorting-associated protein 29 OS=Canis lupus familiaris OX=9615 GN=VPS29 PE=3 SV=1	C_familiaris	1	2	1
Medium	E2RFA6	Unc-13 homolog D OS=Canis lupus familiaris OX=9615 GN=UNC13D PE=4 SV=2	C_familiaris	1	1	1
Medium	E2R4N4	Semaphorin 6A OS=Canis lupus familiaris OX=9615 GN=SEMA6A PE=4 SV=1	C_familiaris	1	1	1
Medium	A0A5F4CJE6	T-cell surface glycoprotein CD3 epsilon chain OS=Canis lupus familiaris OX=9615 GN=CD3E PE=4 SV=1	C_familiaris	1	2	1
Medium	E2QXN6	Microsomal triglyceride transfer protein large subunit OS=Canis lupus familiaris OX=9615 GN=MTTP PE=4 SV=2	C_familiaris	1	2	1
Medium	A0A5F4BRT3	Zinc finger and BTB domain containing 21 OS=Canis lupus familiaris OX=9615 GN=ZBTB21 PE=4 SV=1	C_familiaris	1	1	1
Medium	E2RR98	Elastin microfibril interfacer 3 OS=Canis lupus familiaris OX=9615 GN=EMILIN3 PE=4 SV=1	C_familiaris	1	1	1
Medium	E2RCI2	Kelch domain containing 3 OS=Canis lupus familiaris OX=9615 GN=KLHDC3 PE=4 SV=2	C_familiaris	1	1	1
Medium	P24643	Calnexin OS=Canis lupus familiaris OX=9615 GN=CANX PE=1 SV=3	C_familiaris	1	1	1
Medium	E2QZ69	Histidine--tRNA ligase, cytoplasmic OS=Canis lupus familiaris OX=9615 GN=HARS1 PE=3 SV=1	C_familiaris	1	1	1
Medium	D0VWQ5	60S ribosomal protein L19 OS=Canis lupus familiaris OX=9615 GN=RPL19 PE=1 SV=1	C_familiaris	1	1	1
Medium	F1PXV0	Uncharacterized protein OS=Canis lupus familiaris OX=9615 GN=LOC606788 PE=4 SV=2	C_familiaris	1	2	1
Medium	E2RSP9	Testis specific serine kinase 4 OS=Canis lupus familiaris OX=9615 GN=TSSK4 PE=4 SV=1	C_familiaris	1	2	1
Medium	A0A5F4DDI7	Threonyl-tRNA synthetase OS=Canis lupus familiaris OX=9615 GN=TARS1 PE=3 SV=1	C_familiaris	1	1	1
Medium	A0A5F4D532	NR LBD domain-containing protein OS=Canis lupus familiaris OX=9615 PE=4 SV=1	C_familiaris	1	1	1
Medium	A0A5F4C800	Proteasome activator subunit 2 OS=Canis lupus familiaris OX=9615 GN=PSME2 PE=3 SV=1	C_familiaris	1	1	1
Medium	E2RBC7	Synaptosome associated protein 29 OS=Canis lupus familiaris OX=9615 GN=SNAP29 PE=4 SV=2	C_familiaris	1	1	1
Medium	A0A5F4BS46	Transmembrane protein 33 OS=Canis lupus familiaris OX=9615 GN=TMEM33 PE=3 SV=1	C_familiaris	1	1	1
Medium	J9P6M2	Ninein OS=Canis lupus familiaris OX=9615 GN=NIN PE=4 SV=2	C_familiaris	1	1	1
Medium	A0A5F4BV62	Centrosomal protein 85 like OS=Canis lupus familiaris OX=9615 GN=CEP85L PE=4 SV=1	C_familiaris	1	1	1
Medium	A0A5F4CA62	Dystonin OS=Canis lupus familiaris OX=9615 GN=DST PE=4 SV=1	C_familiaris	1	1	1
Medium	A0A5F4D792	Basal body-orientation factor 1 OS=Canis lupus familiaris OX=9615 GN=BBOF1 PE=3 SV=1	C_familiaris	1	2	1
High	A0A5F4D5S9	Fibronectin OS=Canis lupus familiaris OX=9615 GN=FN1 PE=4 SV=1	C_familiaris	80	577	0

## Sheet: 5
Protein FDR Confidence	Accession	Description	Marked as	Peptides	PSMs	Unique Peptides
High	E2R1P6	Spectrin alpha, erythrocytic 1 OS=Canis lupus familiaris OX=9615 GN=SPTA1 PE=3 SV=3	C_familiaris	129	331	129
High	F1Q253	Spectrin beta chain OS=Canis lupus familiaris OX=9615 GN=SPTB PE=3 SV=3	C_familiaris	113	278	113
High	A0A5F4CL11	Ankyrin 1 OS=Canis lupus familiaris OX=9615 GN=ANK1 PE=4 SV=1	C_familiaris	73	187	73
High	F1PGM1	C3-beta-c OS=Canis lupus familiaris OX=9615 GN=C3 PE=4 SV=2	C_familiaris	62	165	54
High	G1K2B9	von Willebrand factor OS=Canis lupus familiaris OX=9615 GN=VWF PE=4 SV=2	C_familiaris	48	93	48
High	J9P430	Beta-1 metal-binding globulin OS=Canis lupus familiaris OX=9615 GN=TF PE=3 SV=1	C_familiaris	43	213	43
High	F1PWW0	Filamin A OS=Canis lupus familiaris OX=9615 GN=FLNA PE=3 SV=3	C_familiaris	41	45	41
High	E2RLQ9	15S Mg(2+)-ATPase p97 subunit OS=Canis lupus familiaris OX=9615 GN=VCP PE=3 SV=3	C_familiaris	38	78	38
High	J9PBN6	Uncharacterized protein OS=Canis lupus familiaris OX=9615 GN=LOC477699 PE=3 SV=1	C_familiaris	36	67	36
High	A0A5F4D5S2	C4a anaphylatoxin OS=Canis lupus familiaris OX=9615 PE=4 SV=1	C_familiaris	39	56	35
High	F6UME0	Uncharacterized protein OS=Canis lupus familiaris OX=9615 GN=LOC477699 PE=3 SV=1	C_familiaris	29	38	29
High	Q2Z1P8	Anion exchange protein OS=Canis lupus familiaris OX=9615 GN=SLC4A1 PE=2 SV=1	C_familiaris	25	182	25
High	F1PDJ5	Apolipoprotein A-I OS=Canis lupus familiaris OX=9615 GN=APOA1 PE=3 SV=1	C_familiaris	25	95	25
High	F1P8Z5	Apolipoprotein B OS=Canis lupus familiaris OX=9615 GN=APOB PE=4 SV=2	C_familiaris	25	26	25
High	F1Q421	Plasminogen OS=Canis lupus familiaris OX=9615 GN=PLG PE=3 SV=2	C_familiaris	24	37	24
High	A0A5F4BXN3	Actin-depolymerizing factor OS=Canis lupus familiaris OX=9615 GN=GSN PE=3 SV=1	C_familiaris	23	41	23
High	F1PBL4	Fibrinogen alpha chain OS=Canis lupus familiaris OX=9615 GN=FGA PE=4 SV=2	C_familiaris	22	45	22
High	F1PEN6	Transferrin receptor protein 1 OS=Canis lupus familiaris OX=9615 GN=TFRC PE=3 SV=2	C_familiaris	22	37	22
High	F1PGS2	Fibrinogen beta chain OS=Canis lupus familiaris OX=9615 GN=FGB PE=4 SV=2	C_familiaris	21	40	21
High	F6XYK7	Adducin 2 OS=Canis lupus familiaris OX=9615 GN=ADD2 PE=3 SV=1	C_familiaris	22	28	21
High	F1PD51	Erythrocyte membrane protein band 4.2 OS=Canis lupus familiaris OX=9615 GN=EPB42 PE=3 SV=3	C_familiaris	20	46	20
High	E2QZQ1	Transferrin OS=Canis lupus familiaris OX=9615 GN=TF PE=3 SV=2	C_familiaris	20	28	20
High	F1PXX1	EH domain containing 3 OS=Canis lupus familiaris OX=9615 GN=EHD3 PE=4 SV=2	C_familiaris	20	25	20
High	E2RS75	C3/C5 convertase OS=Canis lupus familiaris OX=9615 GN=CFB PE=4 SV=2	C_familiaris	18	28	18
High	A0A5F4DEY2	Ceruloplasmin OS=Canis lupus familiaris OX=9615 GN=CP PE=3 SV=1	C_familiaris	18	36	18
High	F1P7J4	Complement C5 OS=Canis lupus familiaris OX=9615 GN=C5 PE=4 SV=3	C_familiaris	18	21	18
High	E2R0T6	Heat shock protein family A (Hsp70) member 8 OS=Canis lupus familiaris OX=9615 GN=HSPA8 PE=3 SV=1	C_familiaris	21	40	17
High	F1P8G0	Fibrinogen gamma chain OS=Canis lupus familiaris OX=9615 GN=FGG PE=4 SV=2	C_familiaris	15	32	15
High	E2R886	Kininogen 1 OS=Canis lupus familiaris OX=9615 GN=KNG1 PE=4 SV=3	C_familiaris	15	31	15
High	J9NSF9	Activation peptide fragment 1 OS=Canis lupus familiaris OX=9615 GN=F2 PE=4 SV=2	C_familiaris	15	18	15
High	Q7YQC6	Heat shock 70 kDa protein 1 OS=Canis lupus familiaris OX=9615 GN=HSPA1 PE=2 SV=1	C_familiaris	17	22	14
High	H9GWY3	Inter-alpha-trypsin inhibitor heavy chain 4 OS=Canis lupus familiaris OX=9615 GN=ITIH4 PE=3 SV=3	C_familiaris	14	17	14
High	A0A5F4BVZ3	Inter-alpha-trypsin inhibitor heavy chain 1 OS=Canis lupus familiaris OX=9615 GN=ITIH1 PE=3 SV=1	C_familiaris	14	18	14
High	E2RES2	Antithrombin-III OS=Canis lupus familiaris OX=9615 GN=SERPINC1 PE=3 SV=3	C_familiaris	19	57	13
High	P18649	Apolipoprotein E OS=Canis lupus familiaris OX=9615 GN=APOE PE=1 SV=3	C_familiaris	12	24	12
High	F1PBT3	Fructose-bisphosphate aldolase OS=Canis lupus familiaris OX=9615 GN=ALDOA PE=3 SV=3	C_familiaris	13	20	12
High	F1PDQ2	Dematin actin binding protein OS=Canis lupus familiaris OX=9615 GN=DMTN PE=4 SV=3	C_familiaris	12	20	12
High	E2RK64	Fermitin family member 3 OS=Canis lupus familiaris OX=9615 GN=FERMT3 PE=3 SV=2	C_familiaris	12	15	12
High	F1PNH6	Selenium binding protein 1 OS=Canis lupus familiaris OX=9615 GN=SELENBP1 PE=3 SV=3	C_familiaris	12	14	12
High	F1PF02	Proteasome subunit beta OS=Canis lupus familiaris OX=9615 GN=PSMB1 PE=3 SV=3	C_familiaris	11	19	11
High	P33703	Beta-2-glycoprotein 1 OS=Canis lupus familiaris OX=9615 GN=APOH PE=2 SV=1	C_familiaris	11	26	11
High	A0A5F4BSQ8	Karyopherin subunit beta 1 OS=Canis lupus familiaris OX=9615 GN=KPNB1 PE=3 SV=1	C_familiaris	11	14	11
High	P54714	Triosephosphate isomerase OS=Canis lupus familiaris OX=9615 GN=TPI1 PE=1 SV=3	C_familiaris	11	15	11
High	F1PG39	Inter-alpha-trypsin inhibitor heavy chain 2 OS=Canis lupus familiaris OX=9615 GN=ITIH2 PE=3 SV=3	C_familiaris	11	14	11
High	E2RK21	Uncharacterized protein OS=Canis lupus familiaris OX=9615 GN=CFH PE=4 SV=3	C_familiaris	11	14	11
High	A0A5F4C8J6	Ubiquitin carboxyl-terminal hydrolase OS=Canis lupus familiaris OX=9615 GN=USP14 PE=3 SV=1	C_familiaris	11	15	11
High	A0A5S6CLE1	Catalase OS=Canis lupus familiaris OX=9615 GN=CAT PE=3 SV=1	C_familiaris	11	15	11
High	A0A5F4BUZ8	Transketolase OS=Canis lupus familiaris OX=9615 GN=TKT PE=4 SV=1	C_familiaris	11	12	11
High	E2RCC8	Uncharacterized protein OS=Canis lupus familiaris OX=9615 PE=4 SV=3	C_familiaris	11	86	10
High	E2QVU9	Biliverdin reductase B OS=Canis lupus familiaris OX=9615 GN=BLVRB PE=4 SV=1	C_familiaris	10	25	10
High	E2R3R2	Proteasome subunit beta OS=Canis lupus familiaris OX=9615 GN=PSMB5 PE=3 SV=1	C_familiaris	10	17	10
High	E2R5W6	Gc-globulin OS=Canis lupus familiaris OX=9615 GN=GC PE=4 SV=3	C_familiaris	10	15	10
High	E2R7E8	Acyl-peptide hydrolase OS=Canis lupus familiaris OX=9615 GN=APEH PE=4 SV=2	C_familiaris	10	12	10
High	E2RMF9	Serpin family A member 5 OS=Canis lupus familiaris OX=9615 GN=SERPINA5 PE=3 SV=2	C_familiaris	10	12	10
High	F1Q317	Galectin OS=Canis lupus familiaris OX=9615 GN=LGALS9 PE=4 SV=1	C_familiaris	10	23	10
High	F1PDY8	Carbonic anhydrase OS=Canis lupus familiaris OX=9615 GN=CA2 PE=3 SV=3	C_familiaris	10	17	10
High	F1PG16	Uncharacterized protein OS=Canis lupus familiaris OX=9615 GN=CD5L PE=4 SV=2	C_familiaris	10	17	10
High	E2RG01	Complement C7 OS=Canis lupus familiaris OX=9615 GN=C7 PE=3 SV=3	C_familiaris	10	11	10
High	E2RFV9	Complement C9 OS=Canis lupus familiaris OX=9615 GN=C9 PE=3 SV=3	C_familiaris	10	10	10
High	F1PPH7	26S proteasome AAA-ATPase subunit RPT1 OS=Canis lupus familiaris OX=9615 GN=PSMC2 PE=3 SV=2	C_familiaris	10	11	10
High	J9NVC6	Immunoglobulin heavy constant mu OS=Canis lupus familiaris OX=9615 GN=IGHM PE=4 SV=2	C_familiaris	9	77	9
High	F1PBK6	Carbonic anhydrase OS=Canis lupus familiaris OX=9615 GN=CA1 PE=3 SV=2	C_familiaris	9	26	9
High	E2R4V3	Serpin family F member 2 OS=Canis lupus familiaris OX=9615 GN=SERPINF2 PE=3 SV=1	C_familiaris	9	18	9
High	E2R7F1	Moesin OS=Canis lupus familiaris OX=9615 GN=MSN PE=4 SV=3	C_familiaris	13	18	9
High	E2QSE3	Flotillin OS=Canis lupus familiaris OX=9615 GN=FLOT1 PE=3 SV=1	C_familiaris	9	11	9
High	F1PPR8	Beta-glucuronidase OS=Canis lupus familiaris OX=9615 GN=GUSB PE=3 SV=2	C_familiaris	9	11	9
High	F1PPG5	Integrin beta OS=Canis lupus familiaris OX=9615 GN=ITGB3 PE=3 SV=2	C_familiaris	9	10	9
High	A0A5F4CZY7	Proteasome subunit alpha type OS=Canis lupus familiaris OX=9615 GN=PSMA1 PE=3 SV=1	C_familiaris	9	14	9
High	F2Z4Q7	Serpin family F member 1 OS=Canis lupus familiaris OX=9615 GN=SERPINF1 PE=3 SV=1	C_familiaris	9	15	9
High	E2RLN1	Serpin family D member 1 OS=Canis lupus familiaris OX=9615 GN=SERPIND1 PE=3 SV=2	C_familiaris	9	12	9
High	F1PTI2	Uncharacterized protein OS=Canis lupus familiaris OX=9615 GN=BTNL10 PE=3 SV=3	C_familiaris	9	10	9
High	E2RPJ4	Glutamate--cysteine ligase OS=Canis lupus familiaris OX=9615 GN=GCLC PE=3 SV=3	C_familiaris	9	10	9
High	F6UZV8	Calcium-activated neutral proteinase 1 OS=Canis lupus familiaris OX=9615 GN=CAPN1 PE=3 SV=2	C_familiaris	9	9	9
High	F1P8L7	Rab GDP dissociation inhibitor OS=Canis lupus familiaris OX=9615 GN=GDI2 PE=3 SV=1	C_familiaris	14	18	8
High	A0A5F4CWA9	Proteasome subunit alpha type OS=Canis lupus familiaris OX=9615 GN=PSMA2 PE=3 SV=1	C_familiaris	8	11	8
High	A0A5S6DEE6	Clusterin OS=Canis lupus familiaris OX=9615 GN=CLU PE=3 SV=1	C_familiaris	8	15	8
High	P38400	Guanine nucleotide-binding protein G(i) subunit alpha-2 OS=Canis lupus familiaris OX=9615 GN=GNAI2 PE=2 SV=2	C_familiaris	9	14	8
High	A0A5F4CR91	Basigin OS=Canis lupus familiaris OX=9615 GN=BSG PE=4 SV=1	C_familiaris	8	15	8
High	E2RMN2	Proteasome subunit alpha type OS=Canis lupus familiaris OX=9615 GN=PSMA6 PE=3 SV=1	C_familiaris	8	18	8
High	F1PZC6	Histidine rich glycoprotein OS=Canis lupus familiaris OX=9615 GN=HRG PE=4 SV=3	C_familiaris	8	13	8
High	F1PH87	Serpin family A member 3 OS=Canis lupus familiaris OX=9615 GN=SERPINA3 PE=3 SV=3	C_familiaris	8	11	8
High	F1PSC2	Talin 1 OS=Canis lupus familiaris OX=9615 GN=TLN1 PE=4 SV=3	C_familiaris	8	10	8
High	A0A5F4C7I8	Anaphylatoxin-like domain-containing protein OS=Canis lupus familiaris OX=9615 GN=LOC484960 PE=4 SV=1	C_familiaris	8	10	8
High	F1P9U4	Dihydropyrimidinase-related protein 2 OS=Canis lupus familiaris OX=9615 GN=DPYSL2 PE=3 SV=2	C_familiaris	8	8	8
High	F1P624	Cullin associated and neddylation dissociated 1 OS=Canis lupus familiaris OX=9615 GN=CAND1 PE=3 SV=2	C_familiaris	8	8	8
High	E2QW49	Proliferation-associated 2G4 OS=Canis lupus familiaris OX=9615 GN=PA2G4 PE=3 SV=1	C_familiaris	8	9	8
High	A0A5F4CEP4	Fetuin B OS=Canis lupus familiaris OX=9615 GN=FETUB PE=4 SV=1	C_familiaris	7	12	7
High	F1PCE5	Serpin family A member 1 OS=Canis lupus familiaris OX=9615 GN=SERPINA1 PE=3 SV=3	C_familiaris	7	15	7
High	A0A5F4C3X9	Actinin alpha 4 OS=Canis lupus familiaris OX=9615 GN=ACTN4 PE=3 SV=1	C_familiaris	13	13	7
High	A0A5F4C709	ATP binding cassette subfamily B member 6 OS=Canis lupus familiaris OX=9615 GN=ABCB6 PE=4 SV=1	C_familiaris	7	8	7
High	E2RRC9	Phosphoglycerate kinase OS=Canis lupus familiaris OX=9615 GN=PGK1 PE=3 SV=1	C_familiaris	7	11	7
High	F1PI01	Kell metallo-endopeptidase OS=Canis lupus familiaris OX=9615 GN=KEL PE=4 SV=3	C_familiaris	7	8	7
High	P62825	GTP-binding nuclear protein Ran OS=Canis lupus familiaris OX=9615 GN=RAN PE=1 SV=3	C_familiaris	7	9	7
High	A0A5F4D8D4	Aspartyl aminopeptidase OS=Canis lupus familiaris OX=9615 GN=DNPEP PE=3 SV=1	C_familiaris	7	8	7
High	E2RT60	Integrin beta OS=Canis lupus familiaris OX=9615 GN=ITGB1 PE=3 SV=3	C_familiaris	7	8	7
High	A0A5F4CTD0	Alpha-1-B glycoprotein OS=Canis lupus familiaris OX=9615 GN=A1BG PE=4 SV=1	C_familiaris	7	10	7
High	E2RPW3	Paraoxonase 3 OS=Canis lupus familiaris OX=9615 GN=PON3 PE=3 SV=3	C_familiaris	7	8	7
High	A0A5F4D0M8	Calpain 5 OS=Canis lupus familiaris OX=9615 GN=CAPN5 PE=3 SV=1	C_familiaris	7	8	7
High	A0A5F4C819	Leukotriene A(4) hydrolase OS=Canis lupus familiaris OX=9615 GN=LTA4H PE=3 SV=1	C_familiaris	7	7	7
High	E2QZ50	Adenylyl cyclase-associated protein OS=Canis lupus familiaris OX=9615 GN=CAP1 PE=3 SV=1	C_familiaris	7	8	7
High	E2QUU5	60 kDa chaperonin OS=Canis lupus familiaris OX=9615 GN=HSPD1 PE=3 SV=2	C_familiaris	7	7	7
High	E2RL88	Integrin subunit alpha 6 OS=Canis lupus familiaris OX=9615 GN=ITGA6 PE=3 SV=2	C_familiaris	7	8	7
High	J9NSQ1	Ig-like domain-containing protein OS=Canis lupus familiaris OX=9615 PE=4 SV=2	C_familiaris	6	40	6
High	F1PCG4	Peroxiredoxin 2 OS=Canis lupus familiaris OX=9615 GN=PRDX2 PE=3 SV=2	C_familiaris	7	13	6
High	F1PIC7	78 kDa glucose-regulated protein OS=Canis lupus familiaris OX=9615 GN=HSPA5 PE=3 SV=2	C_familiaris	8	10	6
High	E2RBR6	Proteasome subunit beta OS=Canis lupus familiaris OX=9615 GN=PSMB4 PE=3 SV=1	C_familiaris	6	12	6
High	F1PRU9	Integrin subunit alpha 2b OS=Canis lupus familiaris OX=9615 GN=ITGA2B PE=3 SV=2	C_familiaris	6	6	6
High	E2R141	Complement component 8 subunit beta OS=Canis lupus familiaris OX=9615 GN=C8B PE=3 SV=1	C_familiaris	6	6	6
High	E2RPC6	Proteasome subunit beta OS=Canis lupus familiaris OX=9615 GN=PSMB7 PE=2 SV=3	C_familiaris	6	9	6
High	F1PGM9	Complement component 4 binding protein alpha OS=Canis lupus familiaris OX=9615 GN=C4BPA PE=4 SV=3	C_familiaris	6	6	6
High	J9P028	Glutathione peroxidase OS=Canis lupus familiaris OX=9615 GN=GPX3 PE=3 SV=2	C_familiaris	6	7	6
High	E2RS79	C3/C5 convertase OS=Canis lupus familiaris OX=9615 GN=C2 PE=4 SV=2	C_familiaris	6	9	6
High	J9P7F7	Ficolin 1 OS=Canis lupus familiaris OX=9615 GN=FCN1 PE=3 SV=1	C_familiaris	6	6	6
High	J9JHN1	RAB11B, member RAS oncogene family OS=Canis lupus familiaris OX=9615 GN=RAB11B PE=4 SV=1	C_familiaris	6	7	6
High	E2QXS7	Adenosylhomocysteinase OS=Canis lupus familiaris OX=9615 GN=AHCY PE=3 SV=3	C_familiaris	6	6	6
High	A0A5F4DEN6	Glycosyl-phosphatidylinositol-specific phospholipase D OS=Canis lupus familiaris OX=9615 GN=GPLD1 PE=3 SV=1	C_familiaris	6	9	6
High	F1PZR4	Amyloid beta precursor protein binding family B member 1 OS=Canis lupus familiaris OX=9615 GN=APBB1 PE=4 SV=3	C_familiaris	6	13	6
High	F1PNS6	Peptidase D OS=Canis lupus familiaris OX=9615 GN=PEPD PE=3 SV=3	C_familiaris	6	6	6
High	E2QXQ9	Tropomodulin 1 OS=Canis lupus familiaris OX=9615 GN=TMOD1 PE=4 SV=1	C_familiaris	6	8	6
High	A0A5F4D182	Serine hydroxymethyltransferase OS=Canis lupus familiaris OX=9615 GN=SHMT1 PE=3 SV=1	C_familiaris	6	6	6
High	J9P9J6	Uncharacterized protein OS=Canis lupus familiaris OX=9615 PE=4 SV=2	C_familiaris	6	8	6
High	P18067	Ras-related protein Rab-7a OS=Canis lupus familiaris OX=9615 GN=RAB7A PE=1 SV=1	C_familiaris	6	7	6
High	E2QV12	Phosphoglucomutase 2 OS=Canis lupus familiaris OX=9615 GN=PGM2 PE=3 SV=1	C_familiaris	6	6	6
High	E2QYX1	Phosphoglycerate mutase OS=Canis lupus familiaris OX=9615 GN=BPGM PE=3 SV=1	C_familiaris	6	9	6
High	Q28259	Glyceraldehyde-3-phosphate dehydrogenase OS=Canis lupus familiaris OX=9615 GN=GAPDH PE=2 SV=3	C_familiaris	11	21	5
High	E2RE76	Apolipoprotein A-IV OS=Canis lupus familiaris OX=9615 GN=APOA4 PE=3 SV=2	C_familiaris	14	22	5
High	A0A5S6CZL3	Apolipoprotein A-IV OS=Canis lupus familiaris OX=9615 GN=APOA4 PE=3 SV=1	C_familiaris	14	19	5
High	P51147	Ras-related protein Rab-5C OS=Canis lupus familiaris OX=9615 GN=RAB5C PE=2 SV=1	C_familiaris	8	14	5
High	E2QUV3	Alpha-2-HS-glycoprotein OS=Canis lupus familiaris OX=9615 GN=AHSG PE=4 SV=2	C_familiaris	5	8	5
High	E2RSI6	FERM domain-containing protein OS=Canis lupus familiaris OX=9615 GN=EZR PE=4 SV=1	C_familiaris	9	11	5
High	E2QX17	Proteasome subunit beta OS=Canis lupus familiaris OX=9615 GN=PSMB3 PE=3 SV=1	C_familiaris	5	7	5
High	A0A5F4D721	Tropomyosin 3 OS=Canis lupus familiaris OX=9615 GN=TPM3 PE=3 SV=1	C_familiaris	8	10	5
High	F1PQN5	Cofilin, non-muscle isoform OS=Canis lupus familiaris OX=9615 GN=CFL1 PE=3 SV=3	C_familiaris	5	6	5
High	F1PZA0	Delta-aminolevulinic acid dehydratase OS=Canis lupus familiaris OX=9615 GN=ALAD PE=3 SV=2	C_familiaris	5	5	5
High	A0A5F4C7X1	Complement factor I OS=Canis lupus familiaris OX=9615 GN=CFI PE=4 SV=1	C_familiaris	5	5	5
High	E2RKR4	Proteasome subunit alpha type OS=Canis lupus familiaris OX=9615 GN=PSMA3 PE=3 SV=2	C_familiaris	5	7	5
High	F1PYX9	Serpin family G member 1 OS=Canis lupus familiaris OX=9615 GN=SERPING1 PE=3 SV=3	C_familiaris	5	6	5
High	A0A5F4CD90	CCT-beta OS=Canis lupus familiaris OX=9615 GN=CCT2 PE=3 SV=1	C_familiaris	5	6	5
High	P24406	Transforming protein RhoA OS=Canis lupus familiaris OX=9615 GN=RHOA PE=2 SV=1	C_familiaris	5	6	5
High	F1PE09	6-phosphogluconate dehydrogenase, decarboxylating OS=Canis lupus familiaris OX=9615 GN=PGD PE=3 SV=3	C_familiaris	5	6	5
High	F1PQ40	Proteasome 26S subunit, ATPase 1 OS=Canis lupus familiaris OX=9615 GN=PSMC1 PE=3 SV=2	C_familiaris	6	8	5
High	F1PPJ1	Phosphatidylinositol-5-phosphate 4-kinase type 2 alpha OS=Canis lupus familiaris OX=9615 GN=PIP4K2A PE=4 SV=2	C_familiaris	5	5	5
High	E2R002	15-oxoprostaglandin 13-reductase OS=Canis lupus familiaris OX=9615 GN=PTGR1 PE=3 SV=2	C_familiaris	5	5	5
High	F1PAL5	Angiotensin 1-10 OS=Canis lupus familiaris OX=9615 GN=AGT PE=3 SV=3	C_familiaris	5	6	5
High	J9P920	Ubiquitin-activating enzyme E1 OS=Canis lupus familiaris OX=9615 GN=UBA1 PE=3 SV=2	C_familiaris	5	5	5
High	A0A5F4CP02	Pyruvate kinase OS=Canis lupus familiaris OX=9615 GN=PKM PE=3 SV=1	C_familiaris	5	5	5
High	A0A5F4DGN2	Ribose-5-phosphate isomerase OS=Canis lupus familiaris OX=9615 GN=LOC475755 PE=3 SV=1	C_familiaris	5	5	5
High	E2R081	Serpin family B member 10 OS=Canis lupus familiaris OX=9615 GN=SERPINB10 PE=3 SV=1	C_familiaris	5	6	5
High	F1Q1Q8	UTP--glucose-1-phosphate uridylyltransferase OS=Canis lupus familiaris OX=9615 GN=UGP2 PE=3 SV=3	C_familiaris	5	5	5
High	E2R9D7	DnaJ heat shock protein family (Hsp40) member B1 OS=Canis lupus familiaris OX=9615 GN=DNAJB1 PE=4 SV=1	C_familiaris	5	7	5
High	P60952	Cell division control protein 42 homolog OS=Canis lupus familiaris OX=9615 GN=CDC42 PE=2 SV=2	C_familiaris	5	6	5
High	E2RAF1	Creatine kinase OS=Canis lupus familiaris OX=9615 GN=CKMT1A PE=3 SV=1	C_familiaris	5	5	5
High	A0A5F4D6V1	Carboxypeptidase B2 OS=Canis lupus familiaris OX=9615 GN=CPB2 PE=3 SV=1	C_familiaris	5	5	5
High	F1PHQ0	Clathrin heavy chain OS=Canis lupus familiaris OX=9615 GN=CLTC PE=3 SV=3	C_familiaris	5	5	5
High	A0A5F4C8R9	AAA domain-containing protein OS=Canis lupus familiaris OX=9615 GN=PSMC6 PE=3 SV=1	C_familiaris	5	5	5
High	F1PNV5	Coagulation factor XI OS=Canis lupus familiaris OX=9615 GN=F11 PE=4 SV=3	C_familiaris	5	5	5
High	F1PKV2	Coactivator-associated arginine methyltransferase 1 OS=Canis lupus familiaris OX=9615 GN=CARM1 PE=4 SV=3	C_familiaris	5	6	5
High	F1PGR0	Disintegrin and metalloproteinase domain-containing protein 10 OS=Canis lupus familiaris OX=9615 GN=ADAM10 PE=4 SV=3	C_familiaris	5	5	5
High	F1P996	G protein pathway suppressor 1 OS=Canis lupus familiaris OX=9615 GN=GPS1 PE=3 SV=3	C_familiaris	5	5	5
High	J9P9E9	Glucose-6-phosphate 1-dehydrogenase OS=Canis lupus familiaris OX=9615 GN=G6PD PE=3 SV=2	C_familiaris	5	6	5
High	J9P2T7	26S proteasome non-ATPase regulatory subunit 5 OS=Canis lupus familiaris OX=9615 PE=4 SV=1	C_familiaris	5	5	5
High	E2RAI8	Non-specific serine/threonine protein kinase OS=Canis lupus familiaris OX=9615 GN=OXSR1 PE=4 SV=2	C_familiaris	5	5	5
High	E2QWN7	Lymphocyte cytosolic protein 1 OS=Canis lupus familiaris OX=9615 GN=LCP1 PE=4 SV=2	C_familiaris	5	5	5
High	P62872	Guanine nucleotide-binding protein G(I)/G(S)/G(T) subunit beta-1 OS=Canis lupus familiaris OX=9615 GN=GNB1 PE=2 SV=3	C_familiaris	8	8	4
High	E2RD95	G protein subunit beta 2 OS=Canis lupus familiaris OX=9615 GN=GNB2 PE=3 SV=1	C_familiaris	8	8	4
High	A0A5F4CAZ5	Actinin alpha 1 OS=Canis lupus familiaris OX=9615 GN=ACTN1 PE=3 SV=1	C_familiaris	10	10	4
High	F1PKW7	Tyrosine 3-monooxygenase/tryptophan 5-monooxygenase activation protein beta OS=Canis lupus familiaris OX=9615 GN=YWHAB PE=3 SV=3	C_familiaris	6	7	4
High	A0A5F4DJ85	Rho GDP dissociation inhibitor alpha OS=Canis lupus familiaris OX=9615 GN=ARHGDIA PE=3 SV=1	C_familiaris	4	4	4
High	P61007	Ras-related protein Rab-8A OS=Canis lupus familiaris OX=9615 GN=RAB8A PE=1 SV=1	C_familiaris	6	12	4
High	F1PUB5	Proteasome subunit alpha 7 OS=Canis lupus familiaris OX=9615 GN=PSMA7 PE=3 SV=3	C_familiaris	6	10	4
High	A0A5F4C1K4	2',3'-cyclic-nucleotide 3'-phosphodiesterase OS=Canis lupus familiaris OX=9615 GN=CNP PE=3 SV=1	C_familiaris	4	4	4
High	E2R761	L-lactate dehydrogenase OS=Canis lupus familiaris OX=9615 GN=LDHB PE=3 SV=1	C_familiaris	5	9	4
High	A0A5F4C3T9	Phosphatidylcholine transfer protein OS=Canis lupus familiaris OX=9615 GN=PCTP PE=4 SV=1	C_familiaris	4	8	4
High	A0A5F4DDG2	Myristoylated alanine rich protein kinase C substrate OS=Canis lupus familiaris OX=9615 GN=MARCKS PE=3 SV=1	C_familiaris	4	5	4
High	F6X7V8	Erythroblast membrane associated protein OS=Canis lupus familiaris OX=9615 GN=ERMAP PE=3 SV=2	C_familiaris	4	5	4
High	J9P9V8	Tetraspanin OS=Canis lupus familiaris OX=9615 GN=CD82 PE=3 SV=2	C_familiaris	4	4	4
High	Q3BCQ5	Ammonium transporter Rh type A OS=Canis lupus familiaris OX=9615 GN=RHAG PE=2 SV=1	C_familiaris	4	8	4
High	A0A5F4CVZ5	Ras-related C3 botulinum toxin substrate 1 OS=Canis lupus familiaris OX=9615 GN=RAC1 PE=4 SV=1	C_familiaris	4	7	4
High	E2RM61	Proteasome 26S subunit, ATPase 5 OS=Canis lupus familiaris OX=9615 GN=PSMC5 PE=3 SV=3	C_familiaris	5	7	4
High	Q2TFN9	Heat shock 70 kDa protein 4 OS=Canis lupus familiaris OX=9615 GN=HSPA4 PE=1 SV=1	C_familiaris	4	4	4
High	A0A0B4J198	Adiponectin D OS=Canis lupus familiaris OX=9615 GN=EIF4A2 PE=4 SV=2	C_familiaris	4	8	4
High	F1PDG4	Uncharacterized protein OS=Canis lupus familiaris OX=9615 GN=UBB PE=4 SV=2	C_familiaris	4	9	4
High	A0A5F4C7K2	Uncharacterized protein OS=Canis lupus familiaris OX=9615 GN=VTN PE=4 SV=1	C_familiaris	4	6	4
High	E2R7A0	Hydroxyacylglutathione hydrolase OS=Canis lupus familiaris OX=9615 GN=HAGH PE=3 SV=2	C_familiaris	4	5	4
High	J9JHH5	Joining chain of multimeric IgA and IgM OS=Canis lupus familiaris OX=9615 GN=JCHAIN PE=4 SV=1	C_familiaris	4	14	4
High	F1PP29	Uncharacterized protein OS=Canis lupus familiaris OX=9615 PE=4 SV=2	C_familiaris	4	5	4
High	E2RJ26	Proteasome 26S subunit, non-ATPase 11 OS=Canis lupus familiaris OX=9615 GN=PSMD11 PE=3 SV=2	C_familiaris	4	6	4
High	F1Q1K9	Hyaluronan binding protein 2 OS=Canis lupus familiaris OX=9615 GN=HABP2 PE=4 SV=3	C_familiaris	4	4	4
High	A0A5F4CZM1	Sulfhydryl oxidase OS=Canis lupus familiaris OX=9615 GN=QSOX1 PE=3 SV=1	C_familiaris	4	6	4
High	F1P7V6	Stress induced phosphoprotein 1 OS=Canis lupus familiaris OX=9615 GN=STIP1 PE=4 SV=3	C_familiaris	4	4	4
High	F1PFG6	Programmed cell death 6 interacting protein OS=Canis lupus familiaris OX=9615 GN=PDCD6IP PE=4 SV=3	C_familiaris	4	4	4
High	E2RB79	T-complex protein 1 subunit gamma OS=Canis lupus familiaris OX=9615 GN=CCT3 PE=3 SV=3	C_familiaris	4	4	4
High	A0A5F4CPQ6	CCT-theta OS=Canis lupus familiaris OX=9615 GN=CCT8 PE=3 SV=1	C_familiaris	4	5	4
High	E2RLD5	Membrane palmitoylated protein 2 OS=Canis lupus familiaris OX=9615 GN=MPP2 PE=3 SV=3	C_familiaris	4	5	4
High	A0A5F4DBF8	V-type proton ATPase subunit a OS=Canis lupus familiaris OX=9615 GN=ATP6V0A1 PE=3 SV=1	C_familiaris	4	4	4
High	A0A5F4D9M4	Uncharacterized protein OS=Canis lupus familiaris OX=9615 GN=ARF3 PE=3 SV=1	C_familiaris	4	5	4
High	A0A5F4CXQ0	Ras suppressor protein 1 OS=Canis lupus familiaris OX=9615 GN=RSU1 PE=4 SV=1	C_familiaris	4	4	4
High	E2RCP9	26S proteasome non-ATPase regulatory subunit 2 OS=Canis lupus familiaris OX=9615 GN=PSMD2 PE=3 SV=1	C_familiaris	4	4	4
High	A0A5F4C9D6	Flotillin OS=Canis lupus familiaris OX=9615 GN=DHRS13 PE=3 SV=1	C_familiaris	4	4	4
High	Q6TEQ7	Annexin A2 OS=Canis lupus familiaris OX=9615 GN=ANXA2 PE=1 SV=1	C_familiaris	4	4	4
High	F6Y713	Alpha-1-acid glycoprotein OS=Canis lupus familiaris OX=9615 GN=LOC100685620 PE=3 SV=1	C_familiaris	4	5	4
High	F1P9P5	Ubiquitin carboxyl-terminal hydrolase OS=Canis lupus familiaris OX=9615 GN=USP5 PE=3 SV=3	C_familiaris	4	5	4
High	A0A5F4CZ37	Monocarboxylate transporter 2 OS=Canis lupus familiaris OX=9615 GN=SLC16A7 PE=3 SV=1	C_familiaris	4	6	4
High	A0A5F4BQH7	Chromosome 9 C17orf99 homolog OS=Canis lupus familiaris OX=9615 GN=C9H17orf99 PE=4 SV=1	C_familiaris	4	5	4
High	P49822	Albumin OS=Canis lupus familiaris OX=9615 GN=ALB PE=1 SV=3	C_familiaris	39	603	3
High	A0A5F4D0P1	Band 4.1 OS=Canis lupus familiaris OX=9615 GN=EPB41 PE=4 SV=1	C_familiaris	25	77	3
High	P60524	Hemoglobin subunit beta OS=Canis lupus familiaris OX=9615 GN=HBB PE=1 SV=1	C_familiaris	15	203	3
High	F1PYZ1	Uncharacterized protein OS=Canis lupus familiaris OX=9615 GN=LOC609402 PE=3 SV=3	C_familiaris	15	183	3
High	E2R2K4	RAP1B, member of RAS oncogene family OS=Canis lupus familiaris OX=9615 GN=RAP1B PE=3 SV=1	C_familiaris	8	15	3
High	O97555	Rab GDP dissociation inhibitor alpha OS=Canis lupus familiaris OX=9615 GN=GDI1 PE=2 SV=1	C_familiaris	9	11	3
High	F1PBL1	14_3_3 domain-containing protein OS=Canis lupus familiaris OX=9615 GN=YWHAZ PE=3 SV=3	C_familiaris	5	5	3
High	F1PVW0	L-lactate dehydrogenase OS=Canis lupus familiaris OX=9615 GN=LDHA PE=3 SV=2	C_familiaris	4	4	3
High	F1PGY1	Heat shock protein 90 alpha family class A member 1 OS=Canis lupus familiaris OX=9615 GN=HSP90AA1 PE=3 SV=3	C_familiaris	5	6	3
High	E2R1N1	Ubiquitin thioesterase OTU1 OS=Canis lupus familiaris OX=9615 GN=YOD1 PE=4 SV=1	C_familiaris	3	3	3
High	F1PXZ9	KRAS proto-oncogene, GTPase OS=Canis lupus familiaris OX=9615 GN=KRAS PE=4 SV=2	C_familiaris	3	5	3
High	Q28288	Syntaxin-binding protein 2 OS=Canis lupus familiaris OX=9615 GN=STXBP2 PE=2 SV=1	C_familiaris	3	3	3
High	A0A5F4CNZ1	Complement component C6 OS=Canis lupus familiaris OX=9615 GN=C6 PE=3 SV=1	C_familiaris	3	3	3
High	E2R0B6	Proteasome subunit beta OS=Canis lupus familiaris OX=9615 GN=PSMB6 PE=3 SV=1	C_familiaris	3	3	3
High	E2RNG3	Carboxypeptidase N subunit 1 OS=Canis lupus familiaris OX=9615 GN=CPN1 PE=3 SV=2	C_familiaris	3	3	3
High	J9NX46	Clathrin light chain A OS=Canis lupus familiaris OX=9615 GN=CLTA PE=4 SV=1	C_familiaris	3	3	3
High	A0A5F4BWF5	Tubulin beta chain OS=Canis lupus familiaris OX=9615 GN=TUBB4B PE=3 SV=1	C_familiaris	3	3	3
High	A0A5F4DCJ3	WD repeat domain 1 OS=Canis lupus familiaris OX=9615 GN=WDR1 PE=4 SV=1	C_familiaris	3	5	3
High	E2REF3	Solute carrier family 14 member 1 OS=Canis lupus familiaris OX=9615 GN=SLC14A1 PE=3 SV=3	C_familiaris	4	5	3
High	E2RTE8	6-pyruvoyl tetrahydrobiopterin synthase OS=Canis lupus familiaris OX=9615 GN=PTS PE=3 SV=1	C_familiaris	3	3	3
High	E2R516	Synaptosomal-associated protein OS=Canis lupus familiaris OX=9615 GN=SNAP23 PE=3 SV=1	C_familiaris	3	3	3
High	Q3BCQ6	Rh antigen-like protein OS=Canis lupus familiaris OX=9615 GN=Rh30 PE=2 SV=1	C_familiaris	3	6	3
High	J9P9T3	Adenylate kinase isoenzyme 1 OS=Canis lupus familiaris OX=9615 GN=AK1 PE=3 SV=1	C_familiaris	3	3	3
High	A7VLI5	Glycophorin C OS=Canis lupus familiaris OX=9615 GN=Gypc PE=2 SV=1	C_familiaris	3	3	3
High	J9P7P2	Uncharacterized protein OS=Canis lupus familiaris OX=9615 GN=LOC610164 PE=3 SV=2	C_familiaris	3	3	3
High	F1PKR3	Metavinculin OS=Canis lupus familiaris OX=9615 GN=VCL PE=3 SV=3	C_familiaris	3	3	3
High	F1Q435	Transglutaminase 2 OS=Canis lupus familiaris OX=9615 GN=TGM2 PE=3 SV=3	C_familiaris	3	4	3
High	F1PHN8	Serpin family A member 4 OS=Canis lupus familiaris OX=9615 GN=SERPINA4 PE=3 SV=3	C_familiaris	3	4	3
High	A0A5F4C586	Transthyretin OS=Canis lupus familiaris OX=9615 GN=TTR PE=3 SV=1	C_familiaris	3	5	3
High	E2QZ19	Serum albumin OS=Canis lupus familiaris OX=9615 GN=AFP PE=4 SV=2	C_familiaris	3	3	3
High	A0A5F4C6I3	Bridging integrator 1 OS=Canis lupus familiaris OX=9615 GN=BIN1 PE=4 SV=1	C_familiaris	3	3	3
High	A0A5F4BS96	Complement C1s OS=Canis lupus familiaris OX=9615 GN=C1S PE=4 SV=1	C_familiaris	3	3	3
High	J9P064	Collectin subfamily member 10 OS=Canis lupus familiaris OX=9615 GN=COLEC10 PE=4 SV=1	C_familiaris	3	3	3
High	J9P3T9	RAN binding protein 1 OS=Canis lupus familiaris OX=9615 GN=RANBP1 PE=4 SV=2	C_familiaris	3	3	3
High	A0A5F4CKD6	Protein kinase domain-containing protein OS=Canis lupus familiaris OX=9615 GN=CSNK2A1 PE=4 SV=1	C_familiaris	3	3	3
High	A0A5F4DBT7	Malate dehydrogenase 1 OS=Canis lupus familiaris OX=9615 GN=MDH1 PE=4 SV=1	C_familiaris	3	4	3
High	A0A5F4C3J9	COP9 signalosome complex subunit 2 OS=Canis lupus familiaris OX=9615 GN=COPS2 PE=3 SV=1	C_familiaris	3	3	3
High	F1P9H3	AP3A hydrolase OS=Canis lupus familiaris OX=9615 GN=ENPP4 PE=3 SV=2	C_familiaris	3	3	3
High	A0A5F4CED7	Plasma retinol-binding protein OS=Canis lupus familiaris OX=9615 GN=RBP4 PE=3 SV=1	C_familiaris	3	4	3
High	F1P7S2	EH domain binding protein 1 like 1 OS=Canis lupus familiaris OX=9615 GN=EHBP1L1 PE=4 SV=3	C_familiaris	3	3	3
High	E2R5H4	Integrin-linked protein kinase OS=Canis lupus familiaris OX=9615 GN=ILK PE=4 SV=1	C_familiaris	3	3	3
High	J9NY67	RNA helicase OS=Canis lupus familiaris OX=9615 PE=3 SV=1	C_familiaris	3	3	3
High	A0A5F4CEZ2	Maltase-glucoamylase OS=Canis lupus familiaris OX=9615 GN=MGAM PE=3 SV=1	C_familiaris	3	3	3
High	E2RH48	26S proteasome AAA-ATPase subunit RPT3 OS=Canis lupus familiaris OX=9615 GN=PSMC4 PE=3 SV=1	C_familiaris	3	3	3
High	F2Z4Q6	Serum albumin OS=Canis lupus familiaris OX=9615 GN=AFP PE=4 SV=2	C_familiaris	38	609	2
High	A0A5F4CUN8	RAB1B, member RAS oncogene family OS=Canis lupus familiaris OX=9615 GN=RAB1B PE=4 SV=1	C_familiaris	6	10	2
High	A0A5F4DCE0	Tropomyosin 1 OS=Canis lupus familiaris OX=9615 GN=TPM1 PE=3 SV=1	C_familiaris	6	7	2
High	A0A5F4DER9	Aquaporin-1 OS=Canis lupus familiaris OX=9615 GN=AQP1 PE=3 SV=1	C_familiaris	2	8	2
High	E2QWR0	Surfactant protein D OS=Canis lupus familiaris OX=9615 GN=SFTPD PE=3 SV=1	C_familiaris	2	4	2
High	E2RLS3	Heat shock protein 90 alpha family class B member 1 OS=Canis lupus familiaris OX=9615 GN=HSP90AB1 PE=3 SV=2	C_familiaris	4	4	2
High	A0A5F4CH95	Nucleoside diphosphate kinase OS=Canis lupus familiaris OX=9615 GN=NME2 PE=3 SV=1	C_familiaris	4	6	2
High	F2Z4P9	Ras-related protein Rab-10 OS=Canis lupus familiaris OX=9615 GN=RAB10 PE=4 SV=1	C_familiaris	4	7	2
High	E2R9D2	Coagulation factor XII OS=Canis lupus familiaris OX=9615 GN=F12 PE=4 SV=3	C_familiaris	2	3	2
High	A0A5F4CS96	Tubulin alpha chain OS=Canis lupus familiaris OX=9615 GN=LOC106557476 PE=3 SV=1	C_familiaris	3	4	2
High	A0A5F4BTN9	Ig-like domain-containing protein OS=Canis lupus familiaris OX=9615 PE=4 SV=1	C_familiaris	3	7	2
High	E2R857	Bleomycin hydrolase OS=Canis lupus familiaris OX=9615 GN=BLMH PE=3 SV=1	C_familiaris	2	2	2
High	F1PI87	Obg-like ATPase 1 OS=Canis lupus familiaris OX=9615 GN=OLA1 PE=3 SV=3	C_familiaris	2	2	2
High	E2RHG2	Peroxiredoxin-1 OS=Canis lupus familiaris OX=9615 GN=PRDX1 PE=3 SV=2	C_familiaris	3	6	2
High	E2R0K4	Ras-related protein Rab-14 OS=Canis lupus familiaris OX=9615 GN=RAB14 PE=3 SV=1	C_familiaris	3	4	2
High	F1PN98	Coagulation factor V OS=Canis lupus familiaris OX=9615 GN=F5 PE=3 SV=2	C_familiaris	3	3	2
High	A0A5F4C9M3	Uncharacterized protein OS=Canis lupus familiaris OX=9615 PE=4 SV=1	C_familiaris	2	2	2
High	A0A5F4DJA2	Ig-like domain-containing protein OS=Canis lupus familiaris OX=9615 GN=DLA-64 PE=3 SV=1	C_familiaris	2	2	2
High	J9NUI6	Alpha-1-microglobulin OS=Canis lupus familiaris OX=9615 GN=AMBP PE=3 SV=1	C_familiaris	2	5	2
High	A0A5F4DI88	Peroxiredoxin 4 OS=Canis lupus familiaris OX=9615 GN=PRDX4 PE=4 SV=1	C_familiaris	2	3	2
High	F1P8T1	Angiopoietin like 6 OS=Canis lupus familiaris OX=9615 GN=ANGPTL6 PE=4 SV=3	C_familiaris	2	2	2
High	E2RMC1	ST13 Hsp70 interacting protein OS=Canis lupus familiaris OX=9615 GN=ST13 PE=3 SV=3	C_familiaris	2	2	2
High	F1P699	Phosphatidylethanolamine-binding protein 1 OS=Canis lupus familiaris OX=9615 GN=PEBP1 PE=3 SV=3	C_familiaris	2	2	2
High	A0A5F4DCB6	Nucleosome assembly protein 1 like 1 OS=Canis lupus familiaris OX=9615 GN=NAP1L1 PE=3 SV=1	C_familiaris	3	3	2
High	A0A5F4BRR8	Stomatin OS=Canis lupus familiaris OX=9615 GN=STOM PE=3 SV=1	C_familiaris	2	2	2
High	E2QYG6	H(+)-transporting two-sector ATPase OS=Canis lupus familiaris OX=9615 GN=ATP6V1A PE=3 SV=1	C_familiaris	2	2	2
High	A0A5F4D0H5	Tyrosine-protein kinase OS=Canis lupus familiaris OX=9615 GN=SRC PE=3 SV=1	C_familiaris	2	2	2
High	A0A5F4C4W3	2-phospho-D-glycerate hydro-lyase OS=Canis lupus familiaris OX=9615 PE=3 SV=1	C_familiaris	2	3	2
High	F1PHZ3	Phosphatidylinositol transfer protein beta OS=Canis lupus familiaris OX=9615 GN=PITPNB PE=4 SV=3	C_familiaris	2	2	2
High	F1PEZ2	NDK domain-containing protein OS=Canis lupus familiaris OX=9615 GN=NME4 PE=3 SV=3	C_familiaris	2	3	2
High	F1PEJ5	Tetraspanin OS=Canis lupus familiaris OX=9615 GN=TSPAN33 PE=3 SV=3	C_familiaris	2	2	2
High	F1PTZ5	CD44 antigen OS=Canis lupus familiaris OX=9615 GN=CD44 PE=4 SV=3	C_familiaris	2	2	2
High	F1PK62	Peptidyl-prolyl cis-trans isomerase OS=Canis lupus familiaris OX=9615 PE=3 SV=2	C_familiaris	2	3	2
High	E2RJC2	Complement C1q C chain OS=Canis lupus familiaris OX=9615 GN=C1QC PE=4 SV=2	C_familiaris	2	2	2
High	J9NWK5	F-actin-capping protein subunit alpha OS=Canis lupus familiaris OX=9615 PE=3 SV=2	C_familiaris	2	2	2
High	A0A5F4BSW0	Voltage-dependent anion-selective channel protein 3 OS=Canis lupus familiaris OX=9615 PE=3 SV=1	C_familiaris	2	2	2
High	A0A5F4C8I0	Importin 5 OS=Canis lupus familiaris OX=9615 GN=IPO5 PE=4 SV=1	C_familiaris	2	2	2
High	F1PAG5	Vesicle amine transport 1 OS=Canis lupus familiaris OX=9615 GN=VAT1 PE=4 SV=3	C_familiaris	2	2	2
High	H9GWG4	Inter-alpha-trypsin inhibitor heavy chain 3 OS=Canis lupus familiaris OX=9615 GN=ITIH3 PE=3 SV=3	C_familiaris	2	2	2
High	E2R8W7	Calcium binding protein 39 OS=Canis lupus familiaris OX=9615 GN=CAB39 PE=3 SV=1	C_familiaris	2	2	2
High	E2QW85	Elongation factor 1-alpha OS=Canis lupus familiaris OX=9615 PE=3 SV=2	C_familiaris	2	2	2
High	F1PRC5	Aamy domain-containing protein OS=Canis lupus familiaris OX=9615 GN=SLC3A2 PE=4 SV=2	C_familiaris	2	2	2
High	E2R8A7	Collectin subfamily member 11 OS=Canis lupus familiaris OX=9615 GN=COLEC11 PE=4 SV=3	C_familiaris	2	2	2
High	J9NTL5	Glycoprotein Ib platelet subunit beta OS=Canis lupus familiaris OX=9615 GN=GP1BB PE=4 SV=2	C_familiaris	2	3	2
High	F1PHD0	Carboxyl ester lipase OS=Canis lupus familiaris OX=9615 GN=CEL PE=3 SV=2	C_familiaris	2	2	2
High	E2RDX2	Charged multivesicular body protein 4B OS=Canis lupus familiaris OX=9615 GN=CHMP4B PE=3 SV=1	C_familiaris	2	2	2
High	A0A5F4DH03	Coagulation factor X OS=Canis lupus familiaris OX=9615 GN=F10 PE=4 SV=1	C_familiaris	2	3	2
High	E2RC10	Synaptophysin like 1 OS=Canis lupus familiaris OX=9615 GN=SYPL1 PE=3 SV=3	C_familiaris	2	2	2
High	A0A5F4C8V1	F-actin-capping protein subunit beta OS=Canis lupus familiaris OX=9615 GN=CAPZB PE=3 SV=1	C_familiaris	2	2	2
High	A0A5F4CWM9	Myosin-9 OS=Canis lupus familiaris OX=9615 GN=MYH9 PE=3 SV=1	C_familiaris	2	2	2
High	F1P8N6	Endoplasmin OS=Canis lupus familiaris OX=9615 GN=HSP90B1 PE=3 SV=1	C_familiaris	2	2	2
High	P63091	Guanine nucleotide-binding protein G(s) subunit alpha OS=Canis lupus familiaris OX=9615 GN=GNAS PE=2 SV=1	C_familiaris	3	3	2
High	A0A5F4CW08	Dynamin GTPase OS=Canis lupus familiaris OX=9615 GN=DNM2 PE=3 SV=1	C_familiaris	2	2	2
[truncated: 235 more rows]

## Sheet: 6
Protein FDR Confidence	Accession	Description	Marked as	Peptides	PSMs	Unique Peptides
[truncated: 694 more rows]

[truncated: 33 more sheets: 7, 8, 9, 10, 11, 12, 13, 14, 15, 16, 17, 18, 19, 20, 21, 22, 23, 24, 25, 26 …]
