# Supplementary material for: Characterization and Proteomic Analysis of Plasma EVs Recovered from Healthy and Diseased Dogs with Canine Leishmaniosis
Source: Int J Mol Sci. 2023 Mar 13;24(6):5490. doi: 10.3390/ijms24065490 (PMC10056832; doi:10.3390/ijms24065490)
Supplement: Supplementary file 1 [file ijms-24-05490-s001.zip › ijms-2208855-supplementary/Table S2.xlsx]

## Sheet: Merge Healthy
Protein FDR Confidence	Accession	Description	Marked as	Peptides	Isoforms	PSMs	Unique Peptides
High	F1P8Z5	Apolipoprotein B OS=Canis lupus familiaris OX=9615 GN=APOB PE=4 SV=2	C_familiaris	236	387	6272	231
High	E2R1P6	Spectrin alpha, erythrocytic 1 OS=Canis lupus familiaris OX=9615 GN=SPTA1 PE=4 SV=3	C_familiaris	184	298	7874	184
High	F1Q253	Spectrin beta chain OS=Canis lupus familiaris OX=9615 GN=SPTB PE=3 SV=3	C_familiaris	162	281	5953	158
High	A0A5F4CG91	von Willebrand factor OS=Canis lupus familiaris OX=9615 GN=VWF PE=4 SV=1	C_familiaris	119	266	6349	119
High	F1PWW0	Filamin A OS=Canis lupus familiaris OX=9615 GN=FLNA PE=4 SV=3	C_familiaris	119	162	2497	109
High	F1PSC2	Talin 1 OS=Canis lupus familiaris OX=9615 GN=TLN1 PE=4 SV=3	C_familiaris	100	126	1157	100
High	F1PGM1	Complement C3 OS=Canis lupus familiaris OX=9615 GN=C3 PE=4 SV=2	C_familiaris	103	247	9249	94
High	F1PEU6	Hemicentin 2 OS=Canis lupus familiaris OX=9615 GN=HMCN2 PE=4 SV=3	C_familiaris	85	92	371	85
High	F6UME0	Uncharacterized protein OS=Canis lupus familiaris OX=9615 GN=LOC477699 PE=4 SV=1	C_familiaris	81	179	6200	74
High	A0A5F4CWM9	Myosin-9 OS=Canis lupus familiaris OX=9615 GN=MYH9 PE=4 SV=1	C_familiaris	82	119	634	73
High	E2R4Q1	LDL receptor related protein 1 OS=Canis lupus familiaris OX=9615 GN=LRP1 PE=4 SV=3	C_familiaris	70	85	242	70
High	J9P430	Transferrin OS=Canis lupus familiaris OX=9615 GN=TF PE=3 SV=1	C_familiaris	65	111	6630	62
High	E2RK21	Uncharacterized protein OS=Canis lupus familiaris OX=9615 GN=CFH PE=4 SV=3	C_familiaris	55	132	2672	55
High	E2RLQ9	Valosin containing protein OS=Canis lupus familiaris OX=9615 GN=VCP PE=3 SV=3	C_familiaris	55	90	1676	55
High	F1PN98	Coagulation factor V OS=Canis lupus familiaris OX=9615 GN=F5 PE=3 SV=2	C_familiaris	54	71	1011	54
High	A0A5F4BYK6	Tenascin C OS=Canis lupus familiaris OX=9615 GN=TNC PE=4 SV=1	C_familiaris	52	70	377	52
High	F1PAQ3	Maltase-glucoamylase OS=Canis lupus familiaris OX=9615 GN=MGAM PE=4 SV=3	C_familiaris	56	71	509	50
High	F1PKR3	Vinculin OS=Canis lupus familiaris OX=9615 GN=VCL PE=4 SV=3	C_familiaris	49	66	393	49
High	F1P7J4	Complement C5 OS=Canis lupus familiaris OX=9615 GN=C5 PE=4 SV=3	C_familiaris	48	66	965	48
High	F1P707	Uncharacterized protein OS=Canis lupus familiaris OX=9615 GN=LOC484960 PE=4 SV=3	C_familiaris	48	62	525	48
High	F1PBI6	Thrombospondin 1 OS=Canis lupus familiaris OX=9615 GN=THBS1 PE=4 SV=3	C_familiaris	48	110	1122	47
High	F1PBL4	Fibrinogen alpha chain OS=Canis lupus familiaris OX=9615 GN=FGA PE=4 SV=2	C_familiaris	46	80	5475	41
High	H9GWY3	Inter-alpha-trypsin inhibitor heavy chain 4 OS=Canis lupus familiaris OX=9615 GN=ITIH4 PE=4 SV=3	C_familiaris	41	60	729	41
High	F1Q421	Plasminogen OS=Canis lupus familiaris OX=9615 GN=PLG PE=3 SV=2	C_familiaris	44	92	2214	40
High	F1PHQ0	Clathrin heavy chain OS=Canis lupus familiaris OX=9615 GN=CLTC PE=3 SV=3	C_familiaris	38	38	180	38
High	E2RL88	Integrin subunit alpha 6 OS=Canis lupus familiaris OX=9615 GN=ITGA6 PE=3 SV=2	C_familiaris	37	49	628	37
High	Q2Z1P8	Anion exchange protein OS=Canis lupus familiaris OX=9615 GN=SLC4A1 PE=2 SV=1	C_familiaris	36	85	5275	36
High	F1PDJ5	Apolipoprotein A-I OS=Canis lupus familiaris OX=9615 GN=APOA1 PE=3 SV=1	C_familiaris	36	45	3453	36
High	F6XYK7	Adducin 2 OS=Canis lupus familiaris OX=9615 GN=ADD2 PE=4 SV=1	C_familiaris	37	57	594	36
High	E2QZQ1	Transferrin OS=Canis lupus familiaris OX=9615 GN=TF PE=3 SV=2	C_familiaris	34	53	846	34
High	A0A5F4C8H6	Uncharacterized protein OS=Canis lupus familiaris OX=9615 GN=FBN1 PE=4 SV=1	C_familiaris	34	37	108	34
High	F1PGS2	Fibrinogen beta chain OS=Canis lupus familiaris OX=9615 GN=FGB PE=4 SV=2	C_familiaris	38	114	7549	33
High	F1PD51	Erythrocyte membrane protein band 4.2 OS=Canis lupus familiaris OX=9615 GN=EPB42 PE=4 SV=3	C_familiaris	34	52	929	33
High	E2RG01	Complement C7 OS=Canis lupus familiaris OX=9615 GN=C7 PE=4 SV=3	C_familiaris	33	47	444	33
High	A0A5F4CNZ1	Complement C6 OS=Canis lupus familiaris OX=9615 GN=C6 PE=4 SV=1	C_familiaris	33	38	202	33
High	F1PEN6	Transferrin receptor protein 1 OS=Canis lupus familiaris OX=9615 GN=TFRC PE=4 SV=2	C_familiaris	32	48	791	32
High	F1P8G0	Fibrinogen gamma chain OS=Canis lupus familiaris OX=9615 GN=FGG PE=4 SV=2	C_familiaris	31	97	5330	30
High	P18649	Apolipoprotein E OS=Canis lupus familiaris OX=9615 GN=APOE PE=1 SV=3	C_familiaris	30	70	2809	30
High	F1P903	Complement C1r OS=Canis lupus familiaris OX=9615 GN=C1R PE=3 SV=2	C_familiaris	30	56	1002	30
High	A0A5F4BZM5	Ceruloplasmin OS=Canis lupus familiaris OX=9615 GN=CP PE=4 SV=1	C_familiaris	35	60	823	30
High	F1PRU9	Integrin subunit alpha 2b OS=Canis lupus familiaris OX=9615 GN=ITGA2B PE=3 SV=2	C_familiaris	30	47	755	30
High	F6Y6T8	Uncharacterized protein OS=Canis lupus familiaris OX=9615 GN=PIGR PE=4 SV=2	C_familiaris	29	59	1171	29
High	A0A5F4BXN3	Gelsolin OS=Canis lupus familiaris OX=9615 GN=GSN PE=4 SV=1	C_familiaris	29	50	1023	29
High	J9NSF9	Prothrombin OS=Canis lupus familiaris OX=9615 GN=F2 PE=3 SV=2	C_familiaris	29	38	812	29
High	E2QY07	Actinin alpha 1 OS=Canis lupus familiaris OX=9615 GN=ACTN1 PE=4 SV=1	C_familiaris	47	67	431	29
High	A0A5F4C9L8	Programmed cell death 6 interacting protein OS=Canis lupus familiaris OX=9615 GN=PDCD6IP PE=4 SV=1	C_familiaris	29	36	240	29
High	E2RS75	Uncharacterized protein OS=Canis lupus familiaris OX=9615 GN=CFB PE=3 SV=2	C_familiaris	28	49	741	28
High	E2RT60	Integrin beta OS=Canis lupus familiaris OX=9615 GN=ITGB1 PE=3 SV=3	C_familiaris	28	42	519	28
High	F1Q455	PKHD1 like 1 OS=Canis lupus familiaris OX=9615 GN=PKHD1L1 PE=4 SV=3	C_familiaris	29	29	79	28
High	A0A5F4BY85	Glycosylphosphatidylinositol specific phospholipase D1 OS=Canis lupus familiaris OX=9615 GN=GPLD1 PE=4 SV=1	C_familiaris	27	38	497	27
High	E2RK64	Fermitin family member 3 OS=Canis lupus familiaris OX=9615 GN=FERMT3 PE=4 SV=2	C_familiaris	27	31	418	27
High	F1PR31	Collagen type VI alpha 3 chain OS=Canis lupus familiaris OX=9615 GN=COL6A3 PE=4 SV=3	C_familiaris	27	30	93	27
High	F1PPG5	Integrin beta OS=Canis lupus familiaris OX=9615 GN=ITGB3 PE=3 SV=2	C_familiaris	26	51	1197	26
High	A0A5F4BS96	Complement C1s OS=Canis lupus familiaris OX=9615 GN=C1S PE=4 SV=1	C_familiaris	26	45	516	26
High	O97492	Catalase OS=Canis lupus familiaris OX=9615 GN=CAT PE=1 SV=3	C_familiaris	26	32	300	26
High	J9NZL6	Reelin OS=Canis lupus familiaris OX=9615 GN=RELN PE=4 SV=2	C_familiaris	26	28	134	26
High	F1PSS8	Protein S OS=Canis lupus familiaris OX=9615 GN=PROS1 PE=4 SV=3	C_familiaris	29	48	1103	25
High	F1PG39	Inter-alpha-trypsin inhibitor heavy chain 2 OS=Canis lupus familiaris OX=9615 GN=ITIH2 PE=4 SV=3	C_familiaris	25	62	902	25
High	E2RE76	Apolipoprotein A-IV OS=Canis lupus familiaris OX=9615 GN=APOA4 PE=3 SV=2	C_familiaris	27	37	834	25
High	E2QZ19	Serum albumin OS=Canis lupus familiaris OX=9615 GN=AFP PE=4 SV=2	C_familiaris	25	28	457	25
High	E2QWN7	Lymphocyte cytosolic protein 1 OS=Canis lupus familiaris OX=9615 GN=LCP1 PE=4 SV=2	C_familiaris	25	27	157	25
High	F1PKX3	Coagulation factor XIII A chain OS=Canis lupus familiaris OX=9615 GN=F13A1 PE=4 SV=2	C_familiaris	25	30	354	24
High	A0A5F4CNE2	Cartilage oligomeric matrix protein OS=Canis lupus familiaris OX=9615 GN=COMP PE=4 SV=1	C_familiaris	27	54	325	24
High	E2R5R9	UTP--glucose-1-phosphate uridylyltransferase OS=Canis lupus familiaris OX=9615 GN=UGP2 PE=3 SV=3	C_familiaris	24	35	201	24
High	F1PR54	Uncharacterized protein OS=Canis lupus familiaris OX=9615 GN=LTF PE=3 SV=1	C_familiaris	25	26	171	24
High	F1PCV3	Angiotensin-converting enzyme OS=Canis lupus familiaris OX=9615 GN=ACE PE=3 SV=3	C_familiaris	24	25	93	24
High	J9NVC6	Immunoglobulin heavy constant mu OS=Canis lupus familiaris OX=9615 GN=IGHM PE=4 SV=2	C_familiaris	24	48	9272	23
High	F1PG16	Uncharacterized protein OS=Canis lupus familiaris OX=9615 GN=CD5L PE=4 SV=2	C_familiaris	24	54	3666	23
High	A0A5F4CHN8	Thrombospondin 4 OS=Canis lupus familiaris OX=9615 GN=THBS4 PE=4 SV=1	C_familiaris	27	48	373	23
High	E2R141	Complement C8 beta chain OS=Canis lupus familiaris OX=9615 GN=C8B PE=4 SV=1	C_familiaris	23	28	240	23
High	A0A5F4BSQ8	Karyopherin subunit beta 1 OS=Canis lupus familiaris OX=9615 GN=KPNB1 PE=4 SV=1	C_familiaris	23	26	206	23
High	F1P8N6	Endoplasmin OS=Canis lupus familiaris OX=9615 GN=HSP90B1 PE=3 SV=1	C_familiaris	24	26	123	23
High	Q28288	Syntaxin-binding protein 2 OS=Canis lupus familiaris OX=9615 GN=STXBP2 PE=2 SV=1	C_familiaris	22	24	109	22
High	F1PIC7	Heat shock protein family A (Hsp70) member 5 OS=Canis lupus familiaris OX=9615 GN=HSPA5 PE=3 SV=2	C_familiaris	24	28	321	21
High	A0A5F4CIK5	Coagulation factor XIII B chain OS=Canis lupus familiaris OX=9615 GN=F13B PE=4 SV=1	C_familiaris	21	38	297	21
High	A0A5F4CZM1	Quiescin sulfhydryl oxidase 1 OS=Canis lupus familiaris OX=9615 GN=QSOX1 PE=4 SV=1	C_familiaris	21	25	178	21
High	A0A5F4DCJ3	WD repeat domain 1 OS=Canis lupus familiaris OX=9615 GN=WDR1 PE=4 SV=1	C_familiaris	21	24	149	21
High	F6UZV8	Calpain 1 OS=Canis lupus familiaris OX=9615 GN=CAPN1 PE=3 SV=2	C_familiaris	21	22	99	21
High	A0A5F4BUK5	Integrin subunit alpha 2 OS=Canis lupus familiaris OX=9615 GN=ITGA2 PE=4 SV=1	C_familiaris	21	22	79	21
High	P19006	Haptoglobin OS=Canis lupus familiaris OX=9615 GN=HP PE=1 SV=2	C_familiaris	20	37	1604	20
High	F1P841	GC vitamin D binding protein OS=Canis lupus familiaris OX=9615 GN=GC PE=4 SV=3	C_familiaris	27	43	1258	20
High	Q7YQC6	Heat shock 70 kDa protein 1 OS=Canis lupus familiaris OX=9615 GN=HSPA1 PE=2 SV=1	C_familiaris	24	32	379	20
High	E2RFV9	Complement C9 OS=Canis lupus familiaris OX=9615 GN=C9 PE=4 SV=3	C_familiaris	20	28	247	20
High	A0A5F4BUZ8	Transketolase OS=Canis lupus familiaris OX=9615 GN=TKT PE=4 SV=1	C_familiaris	20	22	185	20
High	F1PNH6	Selenium binding protein 1 OS=Canis lupus familiaris OX=9615 GN=SELENBP1 PE=4 SV=3	C_familiaris	20	20	161	20
High	E2QXN8	Annexin OS=Canis lupus familiaris OX=9615 GN=ANXA11 PE=3 SV=2	C_familiaris	20	23	123	20
High	E2QUU5	60 kDa heat shock protein, mitochondrial OS=Canis lupus familiaris OX=9615 GN=HSPD1 PE=3 SV=2	C_familiaris	20	21	106	20
High	A0A5F4D8A3	Low density lipoprotein receptor OS=Canis lupus familiaris OX=9615 GN=LDLR PE=4 SV=1	C_familiaris	20	26	104	20
High	A0A5F4CWH9	Tripeptidyl peptidase 2 OS=Canis lupus familiaris OX=9615 GN=TPP2 PE=4 SV=1	C_familiaris	20	20	62	20
High	E2RCI8	Annexin OS=Canis lupus familiaris OX=9615 GN=ANXA6 PE=3 SV=3	C_familiaris	20	21	52	20
High	E2QUY1	RAS p21 protein activator 3 OS=Canis lupus familiaris OX=9615 GN=RASA3 PE=4 SV=2	C_familiaris	20	20	50	20
High	E2R0T6	Heat shock protein family A (Hsp70) member 8 OS=Canis lupus familiaris OX=9615 GN=HSPA8 PE=3 SV=1	C_familiaris	28	49	1009	19
High	E2R7A3	Complement factor I OS=Canis lupus familiaris OX=9615 GN=CFI PE=3 SV=3	C_familiaris	20	42	642	19
High	A0A5F4D4F1	Moesin OS=Canis lupus familiaris OX=9615 GN=MSN PE=4 SV=1	C_familiaris	27	38	421	19
High	E2QZ50	Adenylyl cyclase-associated protein OS=Canis lupus familiaris OX=9615 GN=CAP1 PE=3 SV=1	C_familiaris	19	28	292	19
High	E2R7E8	Acylaminoacyl-peptide hydrolase OS=Canis lupus familiaris OX=9615 GN=APEH PE=4 SV=2	C_familiaris	19	22	205	19
High	F1PRH1	ATP binding cassette subfamily B member 6 OS=Canis lupus familiaris OX=9615 GN=ABCB6 PE=4 SV=2	C_familiaris	19	24	189	19
High	A0A5F4CVA0	Ubiquitin specific peptidase 14 OS=Canis lupus familiaris OX=9615 GN=USP14 PE=4 SV=1	C_familiaris	19	19	142	19
High	E2RD86	Protein disulfide-isomerase OS=Canis lupus familiaris OX=9615 GN=PDIA3 PE=3 SV=1	C_familiaris	19	19	94	19
High	F1PGM9	Complement component 4 binding protein alpha OS=Canis lupus familiaris OX=9615 GN=C4BPA PE=4 SV=3	C_familiaris	42	90	7021	18
High	E2RES2	Serpin family C member 1 OS=Canis lupus familiaris OX=9615 GN=SERPINC1 PE=3 SV=3	C_familiaris	27	41	1081	18
High	P25473	Clusterin OS=Canis lupus familiaris OX=9615 GN=CLU PE=2 SV=1	C_familiaris	18	35	750	18
High	E2R4V3	Serpin family F member 2 OS=Canis lupus familiaris OX=9615 GN=SERPINF2 PE=3 SV=1	C_familiaris	18	30	442	18
High	F1PDQ2	Dematin actin binding protein OS=Canis lupus familiaris OX=9615 GN=DMTN PE=4 SV=3	C_familiaris	18	23	428	18
High	E2R109	Complement C8 alpha chain OS=Canis lupus familiaris OX=9615 GN=C8A PE=4 SV=1	C_familiaris	18	36	264	18
High	A0A5F4C5P0	ADAM metallopeptidase domain 10 OS=Canis lupus familiaris OX=9615 GN=ADAM10 PE=4 SV=1	C_familiaris	18	20	131	18
High	E2RS79	Complement C2 OS=Canis lupus familiaris OX=9615 GN=C2 PE=3 SV=2	C_familiaris	18	21	110	18
High	F1PPH7	Proteasome 26S subunit, ATPase 2 OS=Canis lupus familiaris OX=9615 GN=PSMC2 PE=3 SV=2	C_familiaris	18	19	109	18
High	E2QSE3	Flotillin OS=Canis lupus familiaris OX=9615 GN=FLOT1 PE=3 SV=1	C_familiaris	18	21	102	18
High	A0A5F4CAZ7	Sodium/potassium-transporting ATPase subunit alpha-1 OS=Canis lupus familiaris OX=9615 GN=ATP1A1 PE=4 SV=1	C_familiaris	18	18	70	18
High	F1PI01	Kell metallo-endopeptidase OS=Canis lupus familiaris OX=9615 GN=KEL PE=4 SV=3	C_familiaris	18	19	69	18
High	A0A5F4CJL8	Sushi, von Willebrand factor type A, EGF and pentraxin domain containing 1 OS=Canis lupus familiaris OX=9615 GN=SVEP1 PE=4 SV=1	C_familiaris	18	19	67	18
High	Q2TFN9	Heat shock 70 kDa protein 4 OS=Canis lupus familiaris OX=9615 GN=HSPA4 PE=1 SV=1	C_familiaris	18	19	59	18
High	F1PQ46	Anoctamin OS=Canis lupus familiaris OX=9615 GN=ANO6 PE=3 SV=3	C_familiaris	18	19	57	18
High	A0A5F4CTD0	Alpha-1-B glycoprotein OS=Canis lupus familiaris OX=9615 GN=A1BG PE=4 SV=1	C_familiaris	17	28	476	17
High	E2QZN8	Pentraxin 3 OS=Canis lupus familiaris OX=9615 GN=PTX3 PE=4 SV=2	C_familiaris	17	23	282	17
High	E2RLN1	Serpin family D member 1 OS=Canis lupus familiaris OX=9615 GN=SERPIND1 PE=3 SV=2	C_familiaris	17	18	178	17
High	P54714	Triosephosphate isomerase OS=Canis lupus familiaris OX=9615 GN=TPI1 PE=1 SV=3	C_familiaris	17	19	172	17
High	A0A5F4C819	Leukotriene A4 hydrolase OS=Canis lupus familiaris OX=9615 GN=LTA4H PE=4 SV=1	C_familiaris	17	17	106	17
High	E2RCP9	26S proteasome non-ATPase regulatory subunit 2 OS=Canis lupus familiaris OX=9615 GN=PSMD2 PE=3 SV=1	C_familiaris	17	19	67	17
High	F1P797	5-aminoimidazole-4-carboxamide ribonucleotide formyltransferase/IMP cyclohydrolase OS=Canis lupus familiaris OX=9615 GN=ATIC PE=3 SV=2	C_familiaris	17	17	39	17
High	F1Q317	Galectin OS=Canis lupus familiaris OX=9615 GN=LGALS9 PE=4 SV=1	C_familiaris	16	34	752	16
High	J9P7F7	Ficolin 1 OS=Canis lupus familiaris OX=9615 GN=FCN1 PE=4 SV=1	C_familiaris	16	25	744	16
High	F1PXX1	EH domain containing 3 OS=Canis lupus familiaris OX=9615 GN=EHD3 PE=3 SV=2	C_familiaris	31	38	411	16
High	A0A5F4CWL0	Uncharacterized protein OS=Canis lupus familiaris OX=9615 GN=CANT1 PE=4 SV=1	C_familiaris	16	23	383	16
High	E2RJY0	Potassium channel tetramerization domain containing 12 OS=Canis lupus familiaris OX=9615 GN=KCTD12 PE=4 SV=2	C_familiaris	16	24	325	16
High	F1PH87	Serpin family A member 3 OS=Canis lupus familiaris OX=9615 GN=SERPINA3 PE=3 SV=3	C_familiaris	16	16	218	16
High	E2RSI6	FERM domain-containing protein OS=Canis lupus familiaris OX=9615 GN=EZR PE=4 SV=1	C_familiaris	24	25	200	16
High	F1PNR5	Coagulation factor XI OS=Canis lupus familiaris OX=9615 GN=F11 PE=3 SV=3	C_familiaris	24	28	190	16
High	A0A5F4D0M8	Calpain 5 OS=Canis lupus familiaris OX=9615 GN=CAPN5 PE=4 SV=1	C_familiaris	16	17	142	16
High	F1P7V6	Stress induced phosphoprotein 1 OS=Canis lupus familiaris OX=9615 GN=STIP1 PE=4 SV=3	C_familiaris	16	16	84	16
High	F1P9U4	Dihydropyrimidinase like 2 OS=Canis lupus familiaris OX=9615 GN=DPYSL2 PE=4 SV=2	C_familiaris	19	20	83	16
High	F1PRC5	Aamy domain-containing protein OS=Canis lupus familiaris OX=9615 GN=SLC3A2 PE=4 SV=2	C_familiaris	16	16	67	16
High	E2RJ26	Proteasome 26S subunit, non-ATPase 11 OS=Canis lupus familiaris OX=9615 GN=PSMD11 PE=4 SV=2	C_familiaris	16	16	61	16
High	F6V0D8	Chaperonin containing TCP1 subunit 2 OS=Canis lupus familiaris OX=9615 GN=CCT2 PE=3 SV=2	C_familiaris	16	17	59	16
High	F1PAG6	Arp2/3 complex 34 kDa subunit OS=Canis lupus familiaris OX=9615 GN=ARPC2 PE=3 SV=3	C_familiaris	16	17	53	16
High	F1P624	Cullin associated and neddylation dissociated 1 OS=Canis lupus familiaris OX=9615 GN=CAND1 PE=4 SV=2	C_familiaris	16	16	49	16
High	Q28294	Guanine nucleotide-binding protein G(q) subunit alpha OS=Canis lupus familiaris OX=9615 GN=GNAQ PE=2 SV=2	C_familiaris	17	17	48	16
High	F6USM4	Mannan binding lectin serine peptidase 2 OS=Canis lupus familiaris OX=9615 GN=MASP2 PE=3 SV=1	C_familiaris	16	16	39	16
High	P33703	Beta-2-glycoprotein 1 OS=Canis lupus familiaris OX=9615 GN=APOH PE=2 SV=1	C_familiaris	18	30	1529	15
High	F1PZR4	Hemopexin OS=Canis lupus familiaris OX=9615 GN=APBB1 PE=3 SV=3	C_familiaris	15	20	552	15
High	A0A5F4CR91	Basigin OS=Canis lupus familiaris OX=9615 GN=BSG PE=4 SV=1	C_familiaris	15	15	444	15
High	F1PXD6	Proteoglycan 4 OS=Canis lupus familiaris OX=9615 GN=PRG4 PE=4 SV=3	C_familiaris	15	17	240	15
High	F1PVW0	L-lactate dehydrogenase OS=Canis lupus familiaris OX=9615 GN=LDHA PE=3 SV=2	C_familiaris	16	27	182	15
High	A0A5F4D3V5	Tubulin beta 1 class VI OS=Canis lupus familiaris OX=9615 GN=TUBB1 PE=4 SV=1	C_familiaris	18	23	164	15
High	Q6QNF4	Hepatocyte growth factor activator OS=Canis lupus familiaris OX=9615 GN=HGFAC PE=2 SV=1	C_familiaris	15	21	162	15
High	E2QXQ9	Tropomodulin 1 OS=Canis lupus familiaris OX=9615 GN=TMOD1 PE=4 SV=1	C_familiaris	15	15	160	15
High	P18067	Ras-related protein Rab-7a OS=Canis lupus familiaris OX=9615 GN=RAB7A PE=1 SV=1	C_familiaris	15	24	158	15
High	E2RMF9	Serpin family A member 5 OS=Canis lupus familiaris OX=9615 GN=SERPINA5 PE=3 SV=2	C_familiaris	15	18	157	15
High	E2RQF8	Extracellular matrix protein 1 OS=Canis lupus familiaris OX=9615 GN=ECM1 PE=4 SV=3	C_familiaris	15	20	126	15
High	E2R5H4	Integrin linked kinase OS=Canis lupus familiaris OX=9615 GN=ILK PE=4 SV=1	C_familiaris	15	24	93	15
High	F1Q094	Platelet-activating factor acetylhydrolase OS=Canis lupus familiaris OX=9615 GN=PLA2G7 PE=4 SV=1	C_familiaris	15	19	91	15
High	E2RSE5	Dihydropyrimidinase OS=Canis lupus familiaris OX=9615 GN=DPYS PE=4 SV=3	C_familiaris	16	19	78	15
High	F1P9P5	Ubiquitin carboxyl-terminal hydrolase OS=Canis lupus familiaris OX=9615 GN=USP5 PE=3 SV=3	C_familiaris	15	15	72	15
High	A0A5F4CW76	ATP synthase subunit beta, mitochondrial OS=Canis lupus familiaris OX=9615 GN=ATP5F1B PE=4 SV=1	C_familiaris	15	18	66	15
High	F1P7S2	EH domain binding protein 1 like 1 OS=Canis lupus familiaris OX=9615 GN=EHBP1L1 PE=4 SV=3	C_familiaris	15	15	63	15
High	A0A5F4CP88	Protein tyrosine phosphatase receptor type C OS=Canis lupus familiaris OX=9615 GN=PTPRC PE=4 SV=1	C_familiaris	15	15	51	15
High	F1PPR8	Beta-glucuronidase OS=Canis lupus familiaris OX=9615 GN=GUSB PE=3 SV=2	C_familiaris	15	15	47	15
High	F1P983	Protein tyrosine phosphatase receptor type J OS=Canis lupus familiaris OX=9615 GN=PTPRJ PE=4 SV=2	C_familiaris	15	18	47	15
High	J9NZX7	Malic enzyme OS=Canis lupus familiaris OX=9615 GN=ME1 PE=3 SV=2	C_familiaris	15	17	34	15
High	J9P9J6	Uncharacterized protein OS=Canis lupus familiaris OX=9615 PE=4 SV=2	C_familiaris	14	34	2005	14
High	A0A5F4CEP4	Fetuin B OS=Canis lupus familiaris OX=9615 GN=FETUB PE=4 SV=1	C_familiaris	15	23	460	14
High	F1PDY8	Carbonic anhydrase 2 OS=Canis lupus familiaris OX=9615 GN=CA2 PE=3 SV=3	C_familiaris	14	20	347	14
High	F2Z4Q7	Serpin family F member 1 OS=Canis lupus familiaris OX=9615 GN=SERPINF1 PE=3 SV=1	C_familiaris	14	15	194	14
High	E2R9R1	Ras suppressor protein 1 OS=Canis lupus familiaris OX=9615 GN=RSU1 PE=4 SV=1	C_familiaris	14	16	164	14
High	J9PAA4	Carboxypeptidase N subunit 2 OS=Canis lupus familiaris OX=9615 GN=CPN2 PE=4 SV=1	C_familiaris	14	18	149	14
High	H9GWG4	Inter-alpha-trypsin inhibitor heavy chain 3 OS=Canis lupus familiaris OX=9615 GN=ITIH3 PE=4 SV=3	C_familiaris	18	29	148	14
High	A0A5F4DKK2	Attractin OS=Canis lupus familiaris OX=9615 GN=ATRN PE=4 SV=1	C_familiaris	14	17	108	14
High	F1PNS6	Peptidase D OS=Canis lupus familiaris OX=9615 GN=PEPD PE=3 SV=3	C_familiaris	14	16	103	14
High	F1P679	Actin related protein 3 OS=Canis lupus familiaris OX=9615 GN=ACTR3 PE=3 SV=2	C_familiaris	14	18	97	14
High	E2R1N7	Prenylcysteine oxidase 1 OS=Canis lupus familiaris OX=9615 GN=PCYOX1 PE=3 SV=1	C_familiaris	14	16	82	14
High	A0A5F4C175	Platelet and endothelial cell adhesion molecule 1 OS=Canis lupus familiaris OX=9615 GN=PECAM1 PE=4 SV=1	C_familiaris	14	15	81	14
High	F1PTI2	Uncharacterized protein OS=Canis lupus familiaris OX=9615 GN=BTNL10 PE=4 SV=3	C_familiaris	14	19	75	14
High	A0A5F4C9D6	Dehydrogenase/reductase 13 OS=Canis lupus familiaris OX=9615 GN=DHRS13 PE=4 SV=1	C_familiaris	14	15	68	14
High	J9NX65	Uncharacterized protein OS=Canis lupus familiaris OX=9615 GN=SBSN PE=4 SV=2	C_familiaris	14	15	51	14
High	F1PKB2	Alpha-mannosidase OS=Canis lupus familiaris OX=9615 GN=MAN2B1 PE=3 SV=2	C_familiaris	14	15	48	14
High	A4GT58	Cdc42 GTPase-activating protein OS=Canis lupus familiaris OX=9615 GN=ARHGAP1 PE=2 SV=1	C_familiaris	14	14	36	14
High	F1Q3V2	ATP-citrate synthase OS=Canis lupus familiaris OX=9615 GN=ACLY PE=3 SV=3	C_familiaris	14	14	27	14
High	F1PBK6	Carbonic anhydrase 1 OS=Canis lupus familiaris OX=9615 GN=CA1 PE=3 SV=2	C_familiaris	13	25	431	13
High	E2RPW3	Paraoxonase 3 OS=Canis lupus familiaris OX=9615 GN=PON3 PE=4 SV=3	C_familiaris	13	23	376	13
High	F1PF02	Proteasome subunit beta OS=Canis lupus familiaris OX=9615 GN=PSMB1 PE=3 SV=3	C_familiaris	13	19	358	13
High	A0A5F4CZY7	Uncharacterized protein OS=Canis lupus familiaris OX=9615 GN=PSMA1 PE=4 SV=1	C_familiaris	13	21	349	13
High	E2R3R2	Proteasome subunit beta OS=Canis lupus familiaris OX=9615 GN=PSMB5 PE=3 SV=1	C_familiaris	13	17	320	13
High	A0A5F4CLP4	Uncharacterized protein OS=Canis lupus familiaris OX=9615 GN=LOC609365 PE=4 SV=1	C_familiaris	13	17	318	13
High	F1PYX9	Serpin family G member 1 OS=Canis lupus familiaris OX=9615 GN=SERPING1 PE=3 SV=3	C_familiaris	13	17	312	13
High	E2R516	Synaptosomal-associated protein OS=Canis lupus familiaris OX=9615 GN=SNAP23 PE=3 SV=1	C_familiaris	13	19	186	13
High	E2R2F7	Sex hormone binding globulin OS=Canis lupus familiaris OX=9615 GN=SHBG PE=4 SV=1	C_familiaris	13	19	185	13
High	F1PZA0	Delta-aminolevulinic acid dehydratase OS=Canis lupus familiaris OX=9615 GN=ALAD PE=3 SV=2	C_familiaris	13	18	178	13
High	E2R761	L-lactate dehydrogenase OS=Canis lupus familiaris OX=9615 GN=LDHB PE=3 SV=1	C_familiaris	14	19	173	13
High	E2RRC9	Phosphoglycerate kinase OS=Canis lupus familiaris OX=9615 GN=PGK1 PE=3 SV=1	C_familiaris	18	24	160	13
High	Q28256	Platelet glycoprotein Ib alpha chain OS=Canis lupus familiaris OX=9615 GN=GP1BA PE=2 SV=2	C_familiaris	13	15	147	13
High	F1PLR6	Bridging integrator 1 OS=Canis lupus familiaris OX=9615 GN=BIN1 PE=3 SV=3	C_familiaris	14	14	119	13
High	E2R081	Serpin family B member 10 OS=Canis lupus familiaris OX=9615 GN=SERPINB10 PE=3 SV=1	C_familiaris	13	16	95	13
High	F1PQS3	F-actin-capping protein subunit beta OS=Canis lupus familiaris OX=9615 GN=CAPZB PE=3 SV=2	C_familiaris	13	16	85	13
High	F6XNH4	Methylenetetrahydrofolate dehydrogenase, cyclohydrolase and formyltetrahydrofolate synthetase 1 OS=Canis lupus familiaris OX=9615 GN=MTHFD1 PE=3 SV=2	C_familiaris	13	13	84	13
High	A0A5F4DBF8	ATPase H+ transporting V0 subunit a1 OS=Canis lupus familiaris OX=9615 GN=ATP6V0A1 PE=4 SV=1	C_familiaris	13	13	83	13
High	A0A5F4D2T1	Actin related protein 2/3 complex subunit 1B OS=Canis lupus familiaris OX=9615 GN=ARPC1B PE=4 SV=1	C_familiaris	13	18	81	13
High	F1PW10	Transforming growth factor beta induced OS=Canis lupus familiaris OX=9615 GN=TGFBI PE=4 SV=3	C_familiaris	13	18	76	13
High	F6X7V8	Erythroblast membrane associated protein OS=Canis lupus familiaris OX=9615 GN=ERMAP PE=4 SV=2	C_familiaris	13	16	74	13
High	A0A5F4D1L1	Solute carrier family 44 member 1 OS=Canis lupus familiaris OX=9615 GN=SLC44A1 PE=4 SV=1	C_familiaris	13	15	61	13
High	A0A5F4C5K8	Membrane palmitoylated protein 2 OS=Canis lupus familiaris OX=9615 GN=MPP2 PE=4 SV=1	C_familiaris	13	13	46	13
High	E2RAF1	Uncharacterized protein OS=Canis lupus familiaris OX=9615 GN=CKMT1A PE=3 SV=1	C_familiaris	13	15	45	13
High	A0A5F4C1K4	2',3'-cyclic nucleotide 3' phosphodiesterase OS=Canis lupus familiaris OX=9615 GN=CNP PE=4 SV=1	C_familiaris	13	13	43	13
High	F1P7W0	Uncharacterized protein OS=Canis lupus familiaris OX=9615 GN=SELP PE=4 SV=2	C_familiaris	13	17	42	13
High	Q6TEQ7	Annexin A2 OS=Canis lupus familiaris OX=9615 GN=ANXA2 PE=1 SV=1	C_familiaris	13	13	41	13
High	F1Q313	Homogentisate 1,2-dioxygenase OS=Canis lupus familiaris OX=9615 GN=HGD PE=4 SV=2	C_familiaris	13	18	38	13
High	J9NSQ6	Heparan sulfate proteoglycan 2 OS=Canis lupus familiaris OX=9615 GN=HSPG2 PE=4 SV=2	C_familiaris	13	14	27	13
High	A0A5F4CKY1	A-kinase anchoring protein 12 OS=Canis lupus familiaris OX=9615 GN=AKAP12 PE=4 SV=1	C_familiaris	13	13	22	13
High	E2QVU9	Biliverdin reductase B OS=Canis lupus familiaris OX=9615 GN=BLVRB PE=4 SV=1	C_familiaris	12	19	502	12
High	E2RH18	Complement factor properdin OS=Canis lupus familiaris OX=9615 GN=CFP PE=4 SV=1	C_familiaris	12	22	466	12
High	P38400	Guanine nucleotide-binding protein G(i) subunit alpha-2 OS=Canis lupus familiaris OX=9615 GN=GNAI2 PE=2 SV=2	C_familiaris	18	23	426	12
High	F1PZC6	Histidine rich glycoprotein OS=Canis lupus familiaris OX=9615 GN=HRG PE=4 SV=3	C_familiaris	12	19	420	12
High	A0A5F4CED7	Retinol binding protein 4 OS=Canis lupus familiaris OX=9615 GN=RBP4 PE=4 SV=1	C_familiaris	12	19	338	12
High	F1PGY1	Heat shock protein 90 alpha family class A member 1 OS=Canis lupus familiaris OX=9615 GN=HSP90AA1 PE=4 SV=3	C_familiaris	19	19	188	12
High	F1PWQ0	Rab GDP dissociation inhibitor OS=Canis lupus familiaris OX=9615 GN=GDI1 PE=3 SV=2	C_familiaris	20	24	156	12
High	F1Q1K9	Hyaluronan binding protein 2 OS=Canis lupus familiaris OX=9615 GN=HABP2 PE=3 SV=3	C_familiaris	12	13	137	12
High	A0A5F4BTV9	Aldolase, fructose-bisphosphate B OS=Canis lupus familiaris OX=9615 GN=ALDOB PE=4 SV=1	C_familiaris	13	24	112	12
High	E2QSZ5	Coronin OS=Canis lupus familiaris OX=9615 GN=CORO1A PE=3 SV=1	C_familiaris	13	13	110	12
High	A0A5F4DA08	Oncoprotein induced transcript 3 OS=Canis lupus familiaris OX=9615 GN=OIT3 PE=4 SV=1	C_familiaris	12	14	104	12
High	E2R9D2	Coagulation factor XII OS=Canis lupus familiaris OX=9615 GN=F12 PE=4 SV=3	C_familiaris	12	18	97	12
High	E2R002	Prostaglandin reductase 1 OS=Canis lupus familiaris OX=9615 GN=PTGR1 PE=4 SV=2	C_familiaris	12	14	86	12
High	A0A5F4D0H5	SRC proto-oncogene, non-receptor tyrosine kinase OS=Canis lupus familiaris OX=9615 GN=SRC PE=4 SV=1	C_familiaris	14	14	81	12
High	F6UYJ9	Calreticulin OS=Canis lupus familiaris OX=9615 GN=CALR PE=3 SV=2	C_familiaris	12	14	75	12
High	F1PBK7	AAA domain-containing protein OS=Canis lupus familiaris OX=9615 GN=PSMC3 PE=3 SV=2	C_familiaris	12	12	74	12
High	F1PKV2	Coactivator associated arginine methyltransferase 1 OS=Canis lupus familiaris OX=9615 GN=CARM1 PE=3 SV=3	C_familiaris	12	12	71	12
High	E2RPJ4	Glutamate-cysteine ligase catalytic subunit OS=Canis lupus familiaris OX=9615 GN=GCLC PE=4 SV=3	C_familiaris	12	12	64	12
High	A0A5F4D6V1	Carboxypeptidase B2 OS=Canis lupus familiaris OX=9615 GN=CPB2 PE=4 SV=1	C_familiaris	12	12	63	12
High	A0A5F4D8D4	Aspartyl aminopeptidase OS=Canis lupus familiaris OX=9615 GN=DNPEP PE=4 SV=1	C_familiaris	12	12	62	12
High	E2QW49	Proliferation-associated 2G4 OS=Canis lupus familiaris OX=9615 GN=PA2G4 PE=4 SV=1	C_familiaris	12	12	60	12
High	F1PHD0	Carboxyl ester lipase OS=Canis lupus familiaris OX=9615 GN=CEL PE=3 SV=2	C_familiaris	12	12	58	12
High	E2RM61	Proteasome 26S subunit, ATPase 5 OS=Canis lupus familiaris OX=9615 GN=PSMC5 PE=4 SV=3	C_familiaris	13	13	57	12
High	A0A5F4C8R9	Uncharacterized protein OS=Canis lupus familiaris OX=9615 GN=PSMC6 PE=4 SV=1	C_familiaris	12	14	55	12
High	E2QX19	Macrophage stimulating 1 OS=Canis lupus familiaris OX=9615 GN=MST1 PE=3 SV=3	C_familiaris	12	12	49	12
High	A0A5F4CPQ6	Chaperonin containing TCP1 subunit 8 OS=Canis lupus familiaris OX=9615 GN=CCT8 PE=4 SV=1	C_familiaris	12	12	46	12
High	J9P920	Ubiquitin like modifier activating enzyme 1 OS=Canis lupus familiaris OX=9615 GN=UBA1 PE=3 SV=2	C_familiaris	12	12	44	12
High	A0A5F4D182	Serine hydroxymethyltransferase 1 OS=Canis lupus familiaris OX=9615 GN=SHMT1 PE=4 SV=1	C_familiaris	12	12	44	12
High	A0A5F4DI79	Myosin IC OS=Canis lupus familiaris OX=9615 GN=MYO1C PE=4 SV=1	C_familiaris	12	12	39	12
High	E2QXD1	Annexin OS=Canis lupus familiaris OX=9615 GN=ANXA7 PE=3 SV=2	C_familiaris	12	15	32	12
High	F1PB77	Alpha-1,4 glucan phosphorylase OS=Canis lupus familiaris OX=9615 GN=PYGL PE=3 SV=2	C_familiaris	14	15	29	12
High	E2QUY9	ADAM metallopeptidase with thrombospondin type 1 motif 13 OS=Canis lupus familiaris OX=9615 GN=ADAMTS13 PE=4 SV=2	C_familiaris	12	13	27	12
High	E2RNG4	Desmoplakin OS=Canis lupus familiaris OX=9615 GN=DSP PE=4 SV=3	C_familiaris	12	12	27	12
High	J9P416	Tenascin N OS=Canis lupus familiaris OX=9615 GN=TNN PE=4 SV=1	C_familiaris	12	12	16	12
High	A0A5F4DDG2	Myristoylated alanine rich protein kinase C substrate OS=Canis lupus familiaris OX=9615 GN=MARCKS PE=4 SV=1	C_familiaris	11	33	406	11
High	J9NUI6	Alpha-1-microglobulin/bikunin precursor OS=Canis lupus familiaris OX=9615 GN=AMBP PE=4 SV=1	C_familiaris	11	22	301	11
High	E2RMN2	Proteasome subunit alpha type OS=Canis lupus familiaris OX=9615 GN=PSMA6 PE=3 SV=1	C_familiaris	11	19	281	11
High	F1PP29	Uncharacterized protein OS=Canis lupus familiaris OX=9615 PE=4 SV=2	C_familiaris	11	13	229	11
High	E2RPC6	Proteasome subunit beta OS=Canis lupus familiaris OX=9615 GN=PSMB7 PE=2 SV=3	C_familiaris	11	24	208	11
High	E2R8K8	Uncharacterized protein OS=Canis lupus familiaris OX=9615 GN=LOC490399 PE=4 SV=3	C_familiaris	12	16	207	11
High	F1P8L7	Rab GDP dissociation inhibitor OS=Canis lupus familiaris OX=9615 GN=GDI2 PE=3 SV=1	C_familiaris	19	23	184	11
High	A0A5F4CBF2	Tropomyosin 4 OS=Canis lupus familiaris OX=9615 GN=TPM4 PE=4 SV=1	C_familiaris	17	17	177	11
High	F1PAB0	Uncharacterized protein OS=Canis lupus familiaris OX=9615 GN=LOC489647 PE=4 SV=3	C_familiaris	11	16	155	11
High	A0A5F4CHH4	Pleckstrin OS=Canis lupus familiaris OX=9615 GN=PLEK PE=4 SV=1	C_familiaris	11	15	111	11
High	F1Q3I5	Collagen alpha-1(I) chain OS=Canis lupus familiaris OX=9615 GN=COL1A1 PE=4 SV=3	C_familiaris	11	13	105	11
High	Q95MP7	Ferritin heavy chain OS=Canis lupus familiaris OX=9615 GN=FTH1 PE=2 SV=3	C_familiaris	11	15	103	11
High	F1P8T1	Angiopoietin like 6 OS=Canis lupus familiaris OX=9615 GN=ANGPTL6 PE=4 SV=3	C_familiaris	11	13	86	11
High	A0A5F4DH03	Coagulation factor X OS=Canis lupus familiaris OX=9615 GN=F10 PE=4 SV=1	C_familiaris	11	13	81	11
High	A0A5F4BNY8	Thrombospondin 3 OS=Canis lupus familiaris OX=9615 GN=THBS3 PE=4 SV=1	C_familiaris	13	16	66	11
High	A0A5F4D8T6	Uncharacterized protein OS=Canis lupus familiaris OX=9615 GN=PAICS PE=4 SV=1	C_familiaris	11	12	64	11
High	E2QZ98	Angiopoietin like 3 OS=Canis lupus familiaris OX=9615 GN=ANGPTL3 PE=4 SV=1	C_familiaris	11	12	60	11
High	E2RT39	Maltase-glucoamylase 2 (putative) OS=Canis lupus familiaris OX=9615 GN=MGAM2 PE=4 SV=3	C_familiaris	17	18	59	11
High	E2R478	Neuronal pentraxin 1 OS=Canis lupus familiaris OX=9615 GN=NPTX1 PE=4 SV=1	C_familiaris	11	11	58	11
High	J9P4J8	Complement factor H related 5 OS=Canis lupus familiaris OX=9615 GN=CFHR5 PE=4 SV=2	C_familiaris	11	14	54	11
High	E2RQ14	Annexin OS=Canis lupus familiaris OX=9615 GN=ANXA5 PE=3 SV=3	C_familiaris	11	14	51	11
High	E2RBB8	Tyrosine-protein kinase OS=Canis lupus familiaris OX=9615 GN=LYN PE=3 SV=3	C_familiaris	13	13	49	11
High	F1PYM4	Insulin like growth factor binding protein acid labile subunit OS=Canis lupus familiaris OX=9615 GN=IGFALS PE=4 SV=2	C_familiaris	11	11	47	11
High	A0A5F4D3V6	Integrin subunit beta 2 OS=Canis lupus familiaris OX=9615 GN=ITGB2 PE=4 SV=1	C_familiaris	11	11	39	11
High	A0A5F4CN31	Glucose-6-phosphate isomerase OS=Canis lupus familiaris OX=9615 GN=GPI PE=4 SV=1	C_familiaris	11	11	36	11
High	E2QZQ6	Copine 3 OS=Canis lupus familiaris OX=9615 GN=CPNE3 PE=4 SV=2	C_familiaris	12	12	24	11
High	J9NXJ4	Hexose-6-phosphate dehydrogenase/glucose 1-dehydrogenase OS=Canis lupus familiaris OX=9615 GN=H6PD PE=4 SV=2	C_familiaris	11	11	24	11
High	J9P4L3	Arachidonate 15-lipoxygenase OS=Canis lupus familiaris OX=9615 GN=ALOX15 PE=3 SV=1	C_familiaris	11	11	22	11
High	F1Q2F6	Fatty acid synthase OS=Canis lupus familiaris OX=9615 GN=FASN PE=4 SV=3	C_familiaris	11	11	14	11
High	J9P1G2	Adiponectin A OS=Canis lupus familiaris OX=9615 GN=C1QB PE=4 SV=1	C_familiaris	10	24	789	10
High	F1PQN5	Cofilin 1 OS=Canis lupus familiaris OX=9615 GN=CFL1 PE=3 SV=3	C_familiaris	10	11	247	10
High	F1PUM6	SMB domain-containing protein OS=Canis lupus familiaris OX=9615 GN=VTN PE=4 SV=2	C_familiaris	10	13	202	10
High	E2QX17	Proteasome subunit beta OS=Canis lupus familiaris OX=9615 GN=PSMB3 PE=3 SV=1	C_familiaris	10	12	174	10
High	J9P6N4	Tyrosine 3-monooxygenase/tryptophan 5-monooxygenase activation protein eta OS=Canis lupus familiaris OX=9615 GN=YWHAH PE=3 SV=1	C_familiaris	14	17	148	10
High	E2RNG3	Carboxypeptidase N subunit 1 OS=Canis lupus familiaris OX=9615 GN=CPN1 PE=4 SV=2	C_familiaris	10	17	104	10
High	E2RMT7	GMP reductase OS=Canis lupus familiaris OX=9615 GN=GMPR PE=3 SV=1	C_familiaris	12	13	78	10
High	F1PQ40	Proteasome 26S subunit, ATPase 1 OS=Canis lupus familiaris OX=9615 GN=PSMC1 PE=3 SV=2	C_familiaris	11	11	69	10
High	J9P5P9	Apolipoprotein B receptor OS=Canis lupus familiaris OX=9615 GN=APOBR PE=4 SV=1	C_familiaris	10	12	42	10
High	J9P6R1	Proteasome 26S subunit, non-ATPase 7 OS=Canis lupus familiaris OX=9615 GN=PSMD7 PE=4 SV=1	C_familiaris	10	10	41	10
High	E2RH48	Proteasome 26S subunit, ATPase 4 OS=Canis lupus familiaris OX=9615 GN=PSMC4 PE=3 SV=1	C_familiaris	10	13	39	10
High	E2RNG2	ATP synthase subunit alpha OS=Canis lupus familiaris OX=9615 GN=ATP5F1A PE=3 SV=2	C_familiaris	10	10	38	10
High	E2QY46	Dicarbonyl and L-xylulose reductase OS=Canis lupus familiaris OX=9615 GN=DCXR PE=4 SV=2	C_familiaris	10	14	37	10
High	A0A5F4D768	Chaperonin containing TCP1 subunit 5 OS=Canis lupus familiaris OX=9615 GN=CCT5 PE=4 SV=1	C_familiaris	10	12	36	10
High	F1PZL7	Transportin 1 OS=Canis lupus familiaris OX=9615 GN=TNPO1 PE=4 SV=3	C_familiaris	12	12	33	10
High	F1PQD3	Tubulin tyrosine ligase like 12 OS=Canis lupus familiaris OX=9615 GN=TTLL12 PE=4 SV=3	C_familiaris	10	10	24	10
High	A0A5F4CT48	Integrin subunit alpha M OS=Canis lupus familiaris OX=9615 GN=ITGAM PE=4 SV=1	C_familiaris	11	11	21	10
High	F1PR87	Pleckstrin homology domain containing O2 OS=Canis lupus familiaris OX=9615 GN=PLEKHO2 PE=4 SV=2	C_familiaris	10	10	21	10
High	Q28260	Vascular cell adhesion protein 1 OS=Canis lupus familiaris OX=9615 GN=VCAM1 PE=2 SV=1	C_familiaris	10	12	18	10
High	F1PXF9	Hemicentin 1 OS=Canis lupus familiaris OX=9615 GN=HMCN1 PE=4 SV=2	C_familiaris	10	10	16	10
High	A0A5F4CWA9	Proteasome subunit alpha 2 OS=Canis lupus familiaris OX=9615 GN=PSMA2 PE=4 SV=1	C_familiaris	9	12	259	9
High	F1PKW7	Tyrosine 3-monooxygenase/tryptophan 5-monooxygenase activation protein beta OS=Canis lupus familiaris OX=9615 GN=YWHAB PE=3 SV=3	C_familiaris	13	20	252	9
High	F1PCG4	Peroxiredoxin 2 OS=Canis lupus familiaris OX=9615 GN=PRDX2 PE=4 SV=2	C_familiaris	10	13	238	9
High	E2QWR0	Surfactant protein D OS=Canis lupus familiaris OX=9615 GN=SFTPD PE=4 SV=1	C_familiaris	9	15	217	9
High	A0A5F4C3T9	Phosphatidylcholine transfer protein OS=Canis lupus familiaris OX=9615 GN=PCTP PE=4 SV=1	C_familiaris	9	11	158	9
High	J9P889	Collagen type VI alpha 1 chain OS=Canis lupus familiaris OX=9615 GN=COL6A1 PE=4 SV=2	C_familiaris	17	18	126	9
High	E2QYX1	Phosphoglycerate mutase OS=Canis lupus familiaris OX=9615 GN=BPGM PE=3 SV=1	C_familiaris	9	12	124	9
High	E2R0K4	RAB14, member RAS oncogene family OS=Canis lupus familiaris OX=9615 GN=RAB14 PE=4 SV=1	C_familiaris	10	10	117	9
High	J9P064	Collectin subfamily member 10 OS=Canis lupus familiaris OX=9615 GN=COLEC10 PE=4 SV=1	C_familiaris	9	11	116	9
High	F1P7P3	F-actin-capping protein subunit alpha OS=Canis lupus familiaris OX=9615 GN=CAPZA1 PE=3 SV=2	C_familiaris	11	11	103	9
High	P63091	Guanine nucleotide-binding protein G(s) subunit alpha OS=Canis lupus familiaris OX=9615 GN=GNAS PE=2 SV=1	C_familiaris	10	10	90	9
High	A0A5F4BRR8	Stomatin OS=Canis lupus familiaris OX=9615 GN=STOM PE=4 SV=1	C_familiaris	9	14	86	9
High	J9PBI1	LIM and senescent cell antigen-like-containing domain protein OS=Canis lupus familiaris OX=9615 GN=LIMS1 PE=4 SV=2	C_familiaris	9	9	85	9
High	A0A5F4DGJ6	Parvin beta OS=Canis lupus familiaris OX=9615 GN=PARVB PE=4 SV=1	C_familiaris	9	10	77	9
High	A0A5F4CUH8	Golgi membrane protein 1 OS=Canis lupus familiaris OX=9615 GN=GOLM1 PE=4 SV=1	C_familiaris	9	10	77	9
High	F1P719	EH domain containing 4 OS=Canis lupus familiaris OX=9615 GN=EHD4 PE=3 SV=2	C_familiaris	14	14	76	9
High	F1PAL5	Angiotensinogen OS=Canis lupus familiaris OX=9615 GN=AGT PE=3 SV=3	C_familiaris	9	14	73	9
High	E2QXY7	Actin-related protein 2 OS=Canis lupus familiaris OX=9615 GN=ACTR2 PE=3 SV=3	C_familiaris	9	13	60	9
High	J9NX73	Uncharacterized protein OS=Canis lupus familiaris OX=9615 GN=RPIA PE=3 SV=1	C_familiaris	9	12	51	9
High	E2RT65	Phosphoglycerate mutase OS=Canis lupus familiaris OX=9615 GN=PGAM1 PE=3 SV=2	C_familiaris	9	9	47	9
High	F1Q2D2	Glutathione synthetase OS=Canis lupus familiaris OX=9615 GN=GSS PE=3 SV=1	C_familiaris	9	9	35	9
High	J9P9E9	Glucose-6-phosphate 1-dehydrogenase OS=Canis lupus familiaris OX=9615 GN=G6PD PE=3 SV=2	C_familiaris	9	10	33	9
High	A0A5F4DDK9	Purine nucleoside phosphorylase OS=Canis lupus familiaris OX=9615 GN=PNP PE=4 SV=1	C_familiaris	9	9	32	9
High	F1Q057	Peroxidasin OS=Canis lupus familiaris OX=9615 GN=PXDN PE=4 SV=3	C_familiaris	9	11	29	9
High	F1PEK5	Septin 2 OS=Canis lupus familiaris OX=9615 GN=SEPTIN2 PE=3 SV=3	C_familiaris	9	9	28	9
High	E2RP98	Carboxylic ester hydrolase OS=Canis lupus familiaris OX=9615 GN=ACHE PE=3 SV=3	C_familiaris	9	10	26	9
High	F1P6B7	Annexin OS=Canis lupus familiaris OX=9615 GN=ANXA1 PE=3 SV=1	C_familiaris	9	9	26	9
High	E2RB79	T-complex protein 1 subunit gamma OS=Canis lupus familiaris OX=9615 GN=CCT3 PE=3 SV=3	C_familiaris	9	9	24	9
High	F1PEN8	Carboxylic ester hydrolase OS=Canis lupus familiaris OX=9615 GN=BCHE PE=3 SV=1	C_familiaris	9	9	22	9
High	A0A140T8E6	Uncharacterized protein OS=Canis lupus familiaris OX=9615 GN=JUP PE=4 SV=1	C_familiaris	9	9	21	9
High	F1P914	Uncharacterized protein OS=Canis lupus familiaris OX=9615 GN=MVP PE=4 SV=3	C_familiaris	9	11	18	9
High	E2QXP3	Arginyl aminopeptidase OS=Canis lupus familiaris OX=9615 GN=RNPEP PE=4 SV=2	C_familiaris	9	9	17	9
High	A0A5F4C1F0	STEAP3 metalloreductase OS=Canis lupus familiaris OX=9615 GN=STEAP3 PE=4 SV=1	C_familiaris	9	9	16	9
High	F1P933	Angiopoietin-1 OS=Canis lupus familiaris OX=9615 GN=ANGPT1 PE=4 SV=3	C_familiaris	9	10	15	9
High	F1PNY2	Immunoglobulin kappa constant OS=Canis lupus familiaris OX=9615 GN=IGKC PE=4 SV=3	C_familiaris	8	31	3091	8
High	F1PCE5	Serpin family A member 1 OS=Canis lupus familiaris OX=9615 GN=SERPINA1 PE=3 SV=3	C_familiaris	8	12	642	8
High	A0A0B4J198	Adiponectin D OS=Canis lupus familiaris OX=9615 GN=EIF4A2 PE=4 SV=2	C_familiaris	9	13	598	8
High	F1PQ85	Mannan binding lectin serine peptidase 1 OS=Canis lupus familiaris OX=9615 GN=MASP1 PE=3 SV=3	C_familiaris	21	26	386	8
High	F1PBL1	14_3_3 domain-containing protein OS=Canis lupus familiaris OX=9615 GN=YWHAZ PE=3 SV=3	C_familiaris	12	15	273	8
High	E2RBR6	Proteasome subunit beta OS=Canis lupus familiaris OX=9615 GN=PSMB4 PE=3 SV=1	C_familiaris	8	18	219	8
High	E2R8A7	Collectin subfamily member 11 OS=Canis lupus familiaris OX=9615 GN=COLEC11 PE=4 SV=3	C_familiaris	8	12	165	8
High	E2RKR4	Proteasome subunit alpha type OS=Canis lupus familiaris OX=9615 GN=PSMA3 PE=3 SV=2	C_familiaris	8	10	160	8
High	F1PNV5	Coagulation factor XI OS=Canis lupus familiaris OX=9615 GN=KLKB1 PE=3 SV=3	C_familiaris	17	20	148	8
High	F6XY66	Transforming protein RhoA OS=Canis lupus familiaris OX=9615 GN=RHOA PE=4 SV=1	C_familiaris	8	9	118	8
High	F1PKR0	Uncharacterized protein OS=Canis lupus familiaris OX=9615 GN=SDCBP PE=4 SV=3	C_familiaris	8	13	79	8
High	A0A5F4C6Q3	Amine oxidase copper containing 3 OS=Canis lupus familiaris OX=9615 GN=AOC3 PE=4 SV=1	C_familiaris	8	9	79	8
High	F1PXZ9	KRAS proto-oncogene, GTPase OS=Canis lupus familiaris OX=9615 GN=KRAS PE=4 SV=2	C_familiaris	8	9	73	8
High	E2R4H4	Proteasome endopeptidase complex OS=Canis lupus familiaris OX=9615 GN=PSMA5 PE=3 SV=3	C_familiaris	8	13	70	8
High	E2R1N1	YOD1 deubiquitinase OS=Canis lupus familiaris OX=9615 GN=YOD1 PE=4 SV=1	C_familiaris	8	8	67	8
High	F1Q1S9	Uncharacterized protein OS=Canis lupus familiaris OX=9615 GN=TBC1D24 PE=4 SV=2	C_familiaris	8	10	67	8
High	F1PKI4	Chloride intracellular channel protein OS=Canis lupus familiaris OX=9615 GN=CLIC1 PE=3 SV=2	C_familiaris	8	9	49	8
High	E2QW60	Lectin, mannose binding 1 OS=Canis lupus familiaris OX=9615 GN=LMAN1 PE=4 SV=2	C_familiaris	8	17	47	8
High	F1PP71	F11 receptor OS=Canis lupus familiaris OX=9615 GN=F11R PE=4 SV=3	C_familiaris	8	9	46	8
High	Q1HE58	Ras-related protein Rab-27A OS=Canis lupus familiaris OX=9615 GN=RAB27A PE=2 SV=1	C_familiaris	8	8	46	8
High	A0A5F4D0L8	Septin 6 OS=Canis lupus familiaris OX=9615 GN=SEPTIN6 PE=4 SV=1	C_familiaris	9	9	45	8
High	F1PE09	6-phosphogluconate dehydrogenase, decarboxylating OS=Canis lupus familiaris OX=9615 GN=PGD PE=3 SV=3	C_familiaris	8	9	40	8
High	P05124	Creatine kinase B-type OS=Canis lupus familiaris OX=9615 GN=CKB PE=1 SV=1	C_familiaris	8	8	38	8
High	A0A5F4C3L7	Milk fat globule-EGF factor 8 protein OS=Canis lupus familiaris OX=9615 GN=MFGE8 PE=4 SV=1	C_familiaris	8	9	38	8
High	F6XH46	Glutathione peroxidase OS=Canis lupus familiaris OX=9615 GN=GPX1 PE=3 SV=2	C_familiaris	8	8	34	8
High	E2RGG9	Tryptophanyl-tRNA synthetase OS=Canis lupus familiaris OX=9615 GN=WARS1 PE=3 SV=2	C_familiaris	8	9	33	8
High	J9P3W8	Nicotinate phosphoribosyltransferase OS=Canis lupus familiaris OX=9615 GN=NAPRT PE=3 SV=2	C_familiaris	8	9	32	8
High	P52784	ATP-dependent 6-phosphofructokinase, muscle type OS=Canis lupus familiaris OX=9615 GN=PFKM PE=2 SV=2	C_familiaris	8	9	32	8
High	E2REA8	COP9 signalosome subunit 2 OS=Canis lupus familiaris OX=9615 GN=COPS2 PE=4 SV=3	C_familiaris	8	8	32	8
High	J9P7P2	Uncharacterized protein OS=Canis lupus familiaris OX=9615 GN=LOC610164 PE=3 SV=2	C_familiaris	8	8	31	8
High	A0A5F4DAC6	Neuropilin 1 OS=Canis lupus familiaris OX=9615 GN=NRP1 PE=4 SV=1	C_familiaris	8	9	28	8
High	F1PBJ3	Uncharacterized protein OS=Canis lupus familiaris OX=9615 GN=LMNA PE=3 SV=2	C_familiaris	8	8	27	8
High	E2R574	Uncharacterized protein OS=Canis lupus familiaris OX=9615 GN=EEF1G PE=4 SV=1	C_familiaris	8	8	26	8
High	F1PCM9	SH3 domain containing GRB2 like, endophilin B1 OS=Canis lupus familiaris OX=9615 GN=SH3GLB1 PE=4 SV=3	C_familiaris	8	8	23	8
High	F1PGD4	Neural EGFL like 2 OS=Canis lupus familiaris OX=9615 GN=NELL2 PE=4 SV=3	C_familiaris	8	13	23	8
High	F1PPJ1	Phosphatidylinositol-5-phosphate 4-kinase type 2 alpha OS=Canis lupus familiaris OX=9615 GN=PIP4K2A PE=4 SV=2	C_familiaris	8	8	23	8
High	A0A5F4CW08	Dynamin 2 OS=Canis lupus familiaris OX=9615 GN=DNM2 PE=4 SV=1	C_familiaris	8	8	21	8
High	A0A5F4CW16	Coronin 1B OS=Canis lupus familiaris OX=9615 GN=CORO1B PE=4 SV=1	C_familiaris	8	9	20	8
High	E2R5Q1	Calponin OS=Canis lupus familiaris OX=9615 GN=CNN2 PE=3 SV=2	C_familiaris	8	9	20	8
High	E2QW82	Matrix metallopeptidase 19 OS=Canis lupus familiaris OX=9615 GN=MMP19 PE=3 SV=3	C_familiaris	8	8	18	8
High	A0A5F4CKE9	Uncharacterized protein OS=Canis lupus familiaris OX=9615 GN=MAP4 PE=4 SV=1	C_familiaris	8	8	18	8
High	E2R9N5	RNA binding motif protein 12 OS=Canis lupus familiaris OX=9615 GN=RBM12 PE=4 SV=2	C_familiaris	9	9	18	8
High	A0A5F4DKI9	Coagulation factor VIII OS=Canis lupus familiaris OX=9615 GN=F8 PE=4 SV=1	C_familiaris	8	8	17	8
High	F1Q432	Tenascin XB OS=Canis lupus familiaris OX=9615 GN=TNXB PE=4 SV=3	C_familiaris	8	8	14	8
High	A0A5F4DAV6	ATP binding cassette subfamily C member 4 OS=Canis lupus familiaris OX=9615 GN=ABCC4 PE=4 SV=1	C_familiaris	8	8	12	8
High	A0A5F4CX45	Thyroglobulin OS=Canis lupus familiaris OX=9615 GN=TG PE=4 SV=1	C_familiaris	8	8	8	8
High	J9JHH5	Joining chain of multimeric IgA and IgM OS=Canis lupus familiaris OX=9615 GN=JCHAIN PE=4 SV=1	C_familiaris	7	11	415	7
High	P62872	Guanine nucleotide-binding protein G(I)/G(S)/G(T) subunit beta-1 OS=Canis lupus familiaris OX=9615 GN=GNB1 PE=2 SV=3	C_familiaris	13	19	412	7
High	E2QUV3	Alpha 2-HS glycoprotein OS=Canis lupus familiaris OX=9615 GN=AHSG PE=4 SV=2	C_familiaris	10	18	297	7
High	J9NWG4	C-type lectin domain-containing protein OS=Canis lupus familiaris OX=9615 GN=MBL2 PE=4 SV=2	C_familiaris	7	9	254	7
High	J9P028	Glutathione peroxidase OS=Canis lupus familiaris OX=9615 GN=GPX3 PE=3 SV=2	C_familiaris	7	13	248	7
High	E2R5U8	Transthyretin OS=Canis lupus familiaris OX=9615 GN=TTR PE=3 SV=1	C_familiaris	7	8	213	7
High	P51147	Ras-related protein Rab-5C OS=Canis lupus familiaris OX=9615 GN=RAB5C PE=2 SV=1	C_familiaris	10	14	185	7
High	J9NYG8	Complement component 4 binding protein beta OS=Canis lupus familiaris OX=9615 GN=C4BPB PE=4 SV=1	C_familiaris	7	11	180	7
High	E2RLS3	Heat shock protein 90 alpha family class B member 1 OS=Canis lupus familiaris OX=9615 GN=HSP90AB1 PE=3 SV=2	C_familiaris	14	14	173	7
High	F1PFM6	Collagen type VI alpha 1 chain OS=Canis lupus familiaris OX=9615 GN=COL6A1 PE=4 SV=2	C_familiaris	15	17	142	7
High	A0A5F4CZ37	Solute carrier family 16 member 7 OS=Canis lupus familiaris OX=9615 GN=SLC16A7 PE=4 SV=1	C_familiaris	7	8	128	7
High	J9P9V8	Tetraspanin OS=Canis lupus familiaris OX=9615 GN=CD82 PE=3 SV=2	C_familiaris	7	9	125	7
High	E2QX53	Glucosamine-6-phosphate isomerase OS=Canis lupus familiaris OX=9615 GN=GNPDA1 PE=3 SV=1	C_familiaris	11	17	107	7
High	P62825	GTP-binding nuclear protein Ran OS=Canis lupus familiaris OX=9615 GN=RAN PE=1 SV=3	C_familiaris	7	8	104	7
High	F6Y713	Alpha-1-acid glycoprotein OS=Canis lupus familiaris OX=9615 GN=LOC100685620 PE=3 SV=1	C_familiaris	7	8	103	7
High	P60952	Cell division control protein 42 homolog OS=Canis lupus familiaris OX=9615 GN=CDC42 PE=2 SV=2	C_familiaris	8	9	78	7
High	E2QV08	Malate dehydrogenase OS=Canis lupus familiaris OX=9615 GN=MDH1 PE=3 SV=3	C_familiaris	7	7	77	7
High	A0A5F4DJ85	Rho GDP dissociation inhibitor alpha OS=Canis lupus familiaris OX=9615 GN=ARHGDIA PE=4 SV=1	C_familiaris	7	11	72	7
High	J9P7Y9	Uncharacterized protein OS=Canis lupus familiaris OX=9615 PE=4 SV=2	C_familiaris	10	10	69	7
High	F1PPL9	C1q domain-containing protein OS=Canis lupus familiaris OX=9615 GN=C1QTNF3 PE=4 SV=3	C_familiaris	7	10	64	7
High	F1P7F8	Zyxin OS=Canis lupus familiaris OX=9615 GN=ZYX PE=4 SV=3	C_familiaris	7	8	52	7
High	E2RLK6	Adiponectin F1 OS=Canis lupus familiaris OX=9615 GN=LOC609026 PE=4 SV=1	C_familiaris	7	9	48	7
High	F1P996	G protein pathway suppressor 1 OS=Canis lupus familiaris OX=9615 GN=GPS1 PE=4 SV=3	C_familiaris	7	9	46	7
High	F1Q2J4	Notch receptor 3 OS=Canis lupus familiaris OX=9615 GN=NOTCH3 PE=4 SV=3	C_familiaris	7	9	42	7
High	F1PRW0	Proteasome 26S subunit, non-ATPase 4 OS=Canis lupus familiaris OX=9615 GN=PSMD4 PE=4 SV=2	C_familiaris	7	7	41	7
High	E2R115	CD226 molecule OS=Canis lupus familiaris OX=9615 GN=CD226 PE=4 SV=2	C_familiaris	7	9	36	7
High	E2QXS7	Adenosylhomocysteinase OS=Canis lupus familiaris OX=9615 GN=AHCY PE=3 SV=3	C_familiaris	7	7	35	7
High	E2R9D7	DnaJ heat shock protein family (Hsp40) member B1 OS=Canis lupus familiaris OX=9615 GN=DNAJB1 PE=4 SV=1	C_familiaris	7	7	35	7
High	A0A5F4C080	Caldesmon 1 OS=Canis lupus familiaris OX=9615 GN=CALD1 PE=4 SV=1	C_familiaris	7	7	30	7
High	J9P9T3	Adenylate kinase isoenzyme 1 OS=Canis lupus familiaris OX=9615 GN=AK1 PE=3 SV=1	C_familiaris	7	7	27	7
High	E2R8W7	Calcium binding protein 39 OS=Canis lupus familiaris OX=9615 GN=CAB39 PE=4 SV=1	C_familiaris	8	8	26	7
High	F1P8B4	Calnexin OS=Canis lupus familiaris OX=9615 GN=CANX PE=3 SV=2	C_familiaris	7	7	24	7
High	E2RB90	Heterogeneous nuclear ribonucleoprotein F OS=Canis lupus familiaris OX=9615 GN=HNRNPF PE=4 SV=1	C_familiaris	7	7	23	7
High	A0A5F4BP62	Argonaute RISC catalytic component 2 OS=Canis lupus familiaris OX=9615 GN=AGO2 PE=4 SV=1	C_familiaris	7	7	23	7
High	E2QYG6	ATPase H+ transporting V1 subunit A OS=Canis lupus familiaris OX=9615 GN=ATP6V1A PE=3 SV=1	C_familiaris	7	7	21	7
High	F1PRW7	Transportin 2 OS=Canis lupus familiaris OX=9615 GN=TNPO2 PE=4 SV=2	C_familiaris	9	10	18	7
High	F1PHY1	Collagen alpha-2(I) chain OS=Canis lupus familiaris OX=9615 GN=COL1A2 PE=4 SV=1	C_familiaris	7	7	18	7
High	E2R413	Capping actin protein, gelsolin like OS=Canis lupus familiaris OX=9615 GN=CAPG PE=4 SV=3	C_familiaris	7	7	18	7
High	F1P9H3	Ectonucleotide pyrophosphatase/phosphodiesterase 4 OS=Canis lupus familiaris OX=9615 GN=ENPP4 PE=4 SV=2	C_familiaris	7	7	18	7
High	E2RF06	Importin 5 OS=Canis lupus familiaris OX=9615 GN=IPO5 PE=4 SV=3	C_familiaris	7	7	18	7
High	E2QUU1	Eukaryotic translation initiation factor 3 subunit J OS=Canis lupus familiaris OX=9615 GN=EIF3J PE=3 SV=1	C_familiaris	7	7	17	7
High	E2RGP6	Tumor susceptibility 101 OS=Canis lupus familiaris OX=9615 GN=TSG101 PE=4 SV=2	C_familiaris	7	7	17	7
High	F1PNY6	Transient receptor potential cation channel subfamily C member 6 OS=Canis lupus familiaris OX=9615 GN=TRPC6 PE=3 SV=3	C_familiaris	7	10	16	7
High	F1P6Z3	N-ethylmaleimide sensitive factor, vesicle fusing ATPase OS=Canis lupus familiaris OX=9615 GN=NSF PE=4 SV=2	C_familiaris	7	7	14	7
High	F1PX57	26S proteasome non-ATPase regulatory subunit 1 OS=Canis lupus familiaris OX=9615 GN=PSMD1 PE=3 SV=3	C_familiaris	7	7	13	7
High	E2R7L1	Protein disulfide-isomerase A4 OS=Canis lupus familiaris OX=9615 GN=PDIA4 PE=3 SV=2	C_familiaris	7	7	13	7
High	F1PH57	NCK associated protein 1 OS=Canis lupus familiaris OX=9615 GN=NCKAP1 PE=4 SV=2	C_familiaris	7	7	8	7
High	P49822	Serum albumin OS=Canis lupus familiaris OX=9615 GN=ALB PE=1 SV=3	C_familiaris	64	104	22394	6
High	A0A5F4D5S9	Fibronectin OS=Canis lupus familiaris OX=9615 GN=FN1 PE=4 SV=1	C_familiaris	113	373	10568	6
High	J9PAX5	Ig-like domain-containing protein OS=Canis lupus familiaris OX=9615 PE=4 SV=2	C_familiaris	7	21	1118	6
High	E2QX84	Heat shock protein family A (Hsp70) member 2 OS=Canis lupus familiaris OX=9615 GN=HSPA2 PE=3 SV=1	C_familiaris	15	20	389	6
High	A0A5F4C0D1	Complement C1q A chain OS=Canis lupus familiaris OX=9615 GN=C1QA PE=4 SV=1	C_familiaris	6	9	266	6
High	F1PSK6	EH domain containing 1 OS=Canis lupus familiaris OX=9615 GN=EHD1 PE=3 SV=3	C_familiaris	18	20	161	6
High	F1PK62	Peptidyl-prolyl cis-trans isomerase OS=Canis lupus familiaris OX=9615 PE=3 SV=2	C_familiaris	6	14	148	6
High	J9P983	Exostosin like glycosyltransferase 2 OS=Canis lupus familiaris OX=9615 GN=EXTL2 PE=4 SV=2	C_familiaris	8	15	130	6
High	E2RDX2	Charged multivesicular body protein 4B OS=Canis lupus familiaris OX=9615 GN=CHMP4B PE=4 SV=1	C_familiaris	6	8	124	6
High	F1PTZ5	CD44 antigen OS=Canis lupus familiaris OX=9615 GN=CD44 PE=4 SV=3	C_familiaris	6	10	88	6
High	A0A5F4BQH7	Chromosome 9 C17orf99 homolog OS=Canis lupus familiaris OX=9615 GN=C9H17orf99 PE=4 SV=1	C_familiaris	6	7	61	6
High	E2RQ71	Apolipoprotein M OS=Canis lupus familiaris OX=9615 GN=APOM PE=4 SV=2	C_familiaris	6	9	58	6
High	J9NTL5	Glycoprotein Ib platelet subunit beta OS=Canis lupus familiaris OX=9615 GN=GP1BB PE=4 SV=2	C_familiaris	6	6	58	6
High	Q5QQ50	Xylosyltransferase 2 OS=Canis lupus familiaris OX=9615 GN=XYLT2 PE=2 SV=1	C_familiaris	6	6	55	6
High	E2RGF3	Na(+)/H(+) exchange regulatory cofactor NHE-RF OS=Canis lupus familiaris OX=9615 GN=SLC9A3R1 PE=2 SV=3	C_familiaris	6	7	36	6
High	F1P699	Phosphatidylethanolamine-binding protein 1 OS=Canis lupus familiaris OX=9615 GN=PEBP1 PE=4 SV=3	C_familiaris	6	7	36	6
High	E2QXA6	Calpastatin OS=Canis lupus familiaris OX=9615 GN=CAST PE=4 SV=3	C_familiaris	6	6	36	6
High	J9P884	Versican OS=Canis lupus familiaris OX=9615 GN=VCAN PE=4 SV=1	C_familiaris	6	6	32	6
High	E2RAI8	Oxidative stress responsive kinase 1 OS=Canis lupus familiaris OX=9615 GN=OXSR1 PE=4 SV=2	C_familiaris	6	6	32	6
High	Q5W416	Proteasome subunit beta type-8 OS=Canis lupus familiaris OX=9615 GN=PSMB8 PE=1 SV=1	C_familiaris	6	8	31	6
High	Q8HZM5	Glutamine synthetase OS=Canis lupus familiaris OX=9615 GN=GLUL PE=1 SV=3	C_familiaris	6	6	30	6
High	J9NYN2	Cysteine and glycine rich protein 1 OS=Canis lupus familiaris OX=9615 GN=CSRP1 PE=4 SV=1	C_familiaris	6	6	29	6
High	F1PAG5	Vesicle amine transport 1 OS=Canis lupus familiaris OX=9615 GN=VAT1 PE=4 SV=3	C_familiaris	6	6	29	6
High	E2R857	Bleomycin hydrolase OS=Canis lupus familiaris OX=9615 GN=BLMH PE=3 SV=1	C_familiaris	6	6	27	6
High	A0A5F4CKD6	Uncharacterized protein OS=Canis lupus familiaris OX=9615 GN=CSNK2A1 PE=4 SV=1	C_familiaris	6	6	27	6
High	F1PHS2	Serpin family A member 11 OS=Canis lupus familiaris OX=9615 GN=SERPINA11 PE=3 SV=2	C_familiaris	6	6	25	6
High	E2R0D2	Scavenger receptor cysteine rich family member with 5 domains OS=Canis lupus familiaris OX=9615 GN=SSC5D PE=4 SV=3	C_familiaris	6	6	24	6
High	A0A5F4BQI1	Actin related protein 2/3 complex subunit 4 OS=Canis lupus familiaris OX=9615 GN=ARPC4 PE=4 SV=1	C_familiaris	6	6	24	6
High	A0A5F4D0B9	EGF containing fibulin extracellular matrix protein 1 OS=Canis lupus familiaris OX=9615 GN=EFEMP1 PE=4 SV=1	C_familiaris	6	7	22	6
High	F1PIF2	Cathepsin Z OS=Canis lupus familiaris OX=9615 GN=CTSZ PE=3 SV=3	C_familiaris	6	7	21	6
High	E2RPE3	IST1 factor associated with ESCRT-III OS=Canis lupus familiaris OX=9615 GN=IST1 PE=4 SV=1	C_familiaris	6	6	21	6
High	F1PHN8	Serpin family A member 4 OS=Canis lupus familiaris OX=9615 GN=SERPINA4 PE=3 SV=3	C_familiaris	6	6	21	6
High	A0A5F4CJG8	Protein kinase C and casein kinase substrate in neurons 2 OS=Canis lupus familiaris OX=9615 GN=PACSIN2 PE=4 SV=1	C_familiaris	6	6	19	6
High	F1Q1Q0	Coronin OS=Canis lupus familiaris OX=9615 GN=CORO1C PE=3 SV=3	C_familiaris	7	7	18	6
High	F1PKY3	Adenosine deaminase OS=Canis lupus familiaris OX=9615 GN=ADA PE=3 SV=3	C_familiaris	6	6	18	6
High	A0A5F4BZC7	Twinfilin actin binding protein 2 OS=Canis lupus familiaris OX=9615 GN=TWF2 PE=4 SV=1	C_familiaris	6	6	16	6
High	F6XRY2	Eukaryotic translation elongation factor 2 OS=Canis lupus familiaris OX=9615 GN=EEF2 PE=4 SV=1	C_familiaris	6	7	16	6
High	A0A5F4BQT8	Integrin subunit alpha V OS=Canis lupus familiaris OX=9615 GN=ITGAV PE=4 SV=1	C_familiaris	6	6	16	6
High	E2RGK2	Adenylosuccinate lyase OS=Canis lupus familiaris OX=9615 GN=TNRC6B PE=3 SV=2	C_familiaris	6	6	16	6
High	E2RTD6	Hydroxymethylbilane synthase OS=Canis lupus familiaris OX=9615 GN=HMBS PE=3 SV=2	C_familiaris	6	6	15	6
High	E2RT32	Syntaxin 12 OS=Canis lupus familiaris OX=9615 GN=STX12 PE=3 SV=2	C_familiaris	6	6	14	6
High	A0A5F4BY19	RELT like 1 OS=Canis lupus familiaris OX=9615 GN=RELL1 PE=4 SV=1	C_familiaris	6	6	14	6
High	A0A5F4BYH6	Syntaxin 2 OS=Canis lupus familiaris OX=9615 GN=STX2 PE=4 SV=1	C_familiaris	6	6	13	6
High	E2QYG1	Periostin OS=Canis lupus familiaris OX=9615 GN=POSTN PE=4 SV=3	C_familiaris	6	6	12	6
High	E2QUL3	Acyl-CoA synthetase long chain family member 1 OS=Canis lupus familiaris OX=9615 GN=ACSL1 PE=4 SV=2	C_familiaris	6	6	12	6
High	H9GWC7	Fructosamine 3 kinase related protein OS=Canis lupus familiaris OX=9615 GN=FN3KRP PE=3 SV=3	C_familiaris	6	6	11	6
High	E2R0W5	Uncharacterized protein OS=Canis lupus familiaris OX=9615 GN=CR2 PE=4 SV=3	C_familiaris	6	6	8	6
High	E2RII4	EMAP like 2 OS=Canis lupus familiaris OX=9615 GN=EML2 PE=4 SV=3	C_familiaris	6	6	8	6
High	J9P8M2	Fibronectin OS=Canis lupus familiaris OX=9615 GN=FN1 PE=4 SV=2	C_familiaris	112	377	10590	5
High	J9P7E1	Protein 4.1 OS=Canis lupus familiaris OX=9615 GN=EPB41 PE=4 SV=2	C_familiaris	38	55	1227	5
High	J9NY02	Ig-like domain-containing protein OS=Canis lupus familiaris OX=9615 PE=4 SV=2	C_familiaris	9	23	1186	5
High	E2RJC2	Complement C1q C chain OS=Canis lupus familiaris OX=9615 GN=C1QC PE=4 SV=2	C_familiaris	5	17	720	5
High	E2RD95	G protein subunit beta 2 OS=Canis lupus familiaris OX=9615 GN=GNB2 PE=4 SV=1	C_familiaris	12	15	291	5
High	F1PUB5	Proteasome endopeptidase complex OS=Canis lupus familiaris OX=9615 GN=PSMA7 PE=3 SV=3	C_familiaris	8	10	248	5
High	A0A5F4D721	Tropomyosin 3 OS=Canis lupus familiaris OX=9615 GN=TPM3 PE=4 SV=1	C_familiaris	16	17	207	5
High	P61007	Ras-related protein Rab-8A OS=Canis lupus familiaris OX=9615 GN=RAB8A PE=1 SV=1	C_familiaris	7	7	197	5
High	E2QSF4	Tubulin beta chain OS=Canis lupus familiaris OX=9615 GN=TUBB PE=3 SV=1	C_familiaris	21	27	185	5
High	A0A5F4DGD5	Uncharacterized protein OS=Canis lupus familiaris OX=9615 PE=4 SV=1	C_familiaris	5	8	185	5
High	J9NX46	Clathrin light chain A OS=Canis lupus familiaris OX=9615 GN=CLTA PE=3 SV=1	C_familiaris	5	5	117	5
High	E2R0B6	Proteasome subunit beta OS=Canis lupus familiaris OX=9615 GN=PSMB6 PE=3 SV=1	C_familiaris	5	10	80	5
High	A0A5F4D9M4	Uncharacterized protein OS=Canis lupus familiaris OX=9615 GN=ARF3 PE=4 SV=1	C_familiaris	7	8	76	5
High	A0A5F4DCB6	Nucleosome assembly protein 1 like 1 OS=Canis lupus familiaris OX=9615 GN=NAP1L1 PE=4 SV=1	C_familiaris	6	6	47	5
High	E2RNL8	Apolipoprotein D OS=Canis lupus familiaris OX=9615 GN=APOD PE=3 SV=3	C_familiaris	5	5	46	5
High	E2RTE8	6-pyruvoyltetrahydropterin synthase OS=Canis lupus familiaris OX=9615 GN=PTS PE=4 SV=1	C_familiaris	5	6	44	5
High	E2R7A0	Hydroxyacylglutathione hydrolase OS=Canis lupus familiaris OX=9615 GN=HAGH PE=3 SV=2	C_familiaris	5	5	40	5
High	J9P3T9	RAN binding protein 1 OS=Canis lupus familiaris OX=9615 GN=RANBP1 PE=4 SV=2	C_familiaris	5	5	38	5
High	E2RN00	Prickle planar cell polarity protein 2 OS=Canis lupus familiaris OX=9615 GN=PRICKLE2 PE=4 SV=2	C_familiaris	5	5	36	5
High	E2R913	Calcium regulated heat stable protein 1 OS=Canis lupus familiaris OX=9615 GN=CARHSP1 PE=4 SV=2	C_familiaris	5	7	34	5
High	E2QUL2	Vesicle associated membrane protein 8 OS=Canis lupus familiaris OX=9615 GN=VAMP8 PE=4 SV=3	C_familiaris	5	6	32	5
High	F1Q067	Septin 7 OS=Canis lupus familiaris OX=9615 GN=SEPTIN7 PE=3 SV=3	C_familiaris	6	6	31	5
High	A0A5F4BQ47	Phospholipid transfer protein OS=Canis lupus familiaris OX=9615 GN=PLTP PE=4 SV=1	C_familiaris	5	6	30	5
High	F1PBN7	ADAMTS like 2 OS=Canis lupus familiaris OX=9615 GN=ADAMTSL2 PE=4 SV=2	C_familiaris	5	6	27	5
High	E2RKS4	Eukaryotic translation initiation factor 4B OS=Canis lupus familiaris OX=9615 GN=EIF4B PE=4 SV=2	C_familiaris	5	5	27	5
High	A0A5F4BSW0	Uncharacterized protein OS=Canis lupus familiaris OX=9615 PE=4 SV=1	C_familiaris	5	5	26	5
High	J9NY67	Uncharacterized protein OS=Canis lupus familiaris OX=9615 PE=3 SV=1	C_familiaris	5	5	26	5
High	E2RLL6	Chaperonin containing TCP1 subunit 6A OS=Canis lupus familiaris OX=9615 GN=CCT6A PE=3 SV=3	C_familiaris	10	10	25	5
High	G1K288	Ras-related protein Rab-2A OS=Canis lupus familiaris OX=9615 GN=RAB2A PE=4 SV=2	C_familiaris	5	5	23	5
High	J9NT73	Brain abundant membrane attached signal protein 1 OS=Canis lupus familiaris OX=9615 GN=BASP1 PE=4 SV=2	C_familiaris	5	5	22	5
High	E2RD65	Actin-related protein 2/3 complex subunit 5 OS=Canis lupus familiaris OX=9615 GN=ARPC5 PE=3 SV=3	C_familiaris	5	5	21	5
High	F1PQV4	Olfactomedin like 3 OS=Canis lupus familiaris OX=9615 GN=OLFML3 PE=4 SV=2	C_familiaris	5	6	21	5
High	H9GW87	Transaldolase OS=Canis lupus familiaris OX=9615 GN=LOC475937 PE=3 SV=1	C_familiaris	5	5	20	5
High	J9P7X2	Ig-like domain-containing protein OS=Canis lupus familiaris OX=9615 GN=THY1 PE=4 SV=1	C_familiaris	5	6	19	5
High	A0A5F4BXP7	Glycogen phosphorylase B OS=Canis lupus familiaris OX=9615 GN=PYGB PE=4 SV=1	C_familiaris	7	7	18	5
High	F1Q435	Transglutaminase 2 OS=Canis lupus familiaris OX=9615 GN=TGM2 PE=4 SV=3	C_familiaris	5	5	17	5
High	J9P988	CD38 molecule OS=Canis lupus familiaris OX=9615 GN=CD38 PE=4 SV=2	C_familiaris	5	5	15	5
High	F1PQS2	Metalloproteinase inhibitor 1 OS=Canis lupus familiaris OX=9615 GN=TIMP1 PE=4 SV=2	C_familiaris	5	5	15	5
High	A0A5F4CVK3	Uncharacterized protein OS=Canis lupus familiaris OX=9615 PE=4 SV=1	C_familiaris	5	5	14	5
High	F1PXG0	Sorbitol dehydrogenase OS=Canis lupus familiaris OX=9615 GN=SORD PE=3 SV=2	C_familiaris	5	5	14	5
High	F1PFK0	Twinfilin actin binding protein 1 OS=Canis lupus familiaris OX=9615 GN=TWF1 PE=4 SV=2	C_familiaris	5	5	14	5
High	A0A5F4DJ87	Prolyl 4-hydroxylase subunit beta OS=Canis lupus familiaris OX=9615 GN=P4HB PE=4 SV=1	C_familiaris	5	5	13	5
High	E2RE13	ADP ribosylation factor like GTPase 8B OS=Canis lupus familiaris OX=9615 GN=ARL8B PE=3 SV=1	C_familiaris	5	5	13	5
High	P55745	Ras-related protein Rab-21 OS=Canis lupus familiaris OX=9615 GN=RAB21 PE=3 SV=3	C_familiaris	5	5	13	5
High	E2QV12	Phosphoglucomutase 2 OS=Canis lupus familiaris OX=9615 GN=PGM2 PE=4 SV=1	C_familiaris	5	5	13	5
High	E2QT37	Nucleoporin 50 OS=Canis lupus familiaris OX=9615 GN=NUP50 PE=4 SV=2	C_familiaris	5	5	13	5
High	A0A5F4D6P2	Vesicle associated membrane protein 7 OS=Canis lupus familiaris OX=9615 GN=VAMP7 PE=4 SV=1	C_familiaris	5	5	12	5
High	F1PB85	Serpin family A member 7 OS=Canis lupus familiaris OX=9615 GN=SERPINA7 PE=3 SV=2	C_familiaris	5	5	12	5
High	F1Q4A4	Coagulation factor X OS=Canis lupus familiaris OX=9615 GN=F10 PE=3 SV=3	C_familiaris	5	5	11	5
High	E2RRA1	Protein kinase cAMP-dependent type II regulatory subunit beta OS=Canis lupus familiaris OX=9615 GN=PRKAR2B PE=4 SV=1	C_familiaris	5	5	11	5
High	J9P5X6	Exportin 7 OS=Canis lupus familiaris OX=9615 GN=XPO7 PE=4 SV=2	C_familiaris	5	5	11	5
High	E2REI7	Nuclear receptor binding protein 1 (Fragment) OS=Canis lupus familiaris OX=9615 GN=NRBP1 PE=4 SV=2	C_familiaris	5	5	11	5
High	E2QYZ2	5'-nucleotidase OS=Canis lupus familiaris OX=9615 GN=NT5C3A PE=3 SV=1	C_familiaris	5	5	11	5
High	A0A5F4BTH2	Neutrophil cytosolic factor 2 OS=Canis lupus familiaris OX=9615 GN=NCF2 PE=4 SV=1	C_familiaris	5	5	10	5
High	F1PUB3	Heart development protein with EGF like domains 1 OS=Canis lupus familiaris OX=9615 GN=HEG1 PE=4 SV=3	C_familiaris	5	6	9	5
High	F6UY11	Proteasome activator subunit 1 OS=Canis lupus familiaris OX=9615 GN=PSME1 PE=4 SV=2	C_familiaris	5	5	9	5
High	E2RDX0	Uncharacterized protein OS=Canis lupus familiaris OX=9615 PE=4 SV=2	C_familiaris	5	5	9	5
High	A0A5F4CLV9	SEC31 homolog A, COPII coat complex component OS=Canis lupus familiaris OX=9615 GN=SEC31A PE=4 SV=1	C_familiaris	5	5	9	5
High	A0A5F4CJ02	Esterase D OS=Canis lupus familiaris OX=9615 GN=ESD PE=4 SV=1	C_familiaris	5	5	9	5
High	E2RQY6	Calcium-transporting ATPase OS=Canis lupus familiaris OX=9615 GN=ATP2A3 PE=3 SV=2	C_familiaris	5	5	8	5
High	A0A5F4CYE2	Protein tyrosine phosphatase receptor type F OS=Canis lupus familiaris OX=9615 GN=PTPRF PE=4 SV=1	C_familiaris	5	5	8	5
High	J9NXY7	PDZ and LIM domain 1 OS=Canis lupus familiaris OX=9615 GN=PDLIM1 PE=4 SV=2	C_familiaris	5	5	8	5
High	F1PKS1	ATP-dependent 6-phosphofructokinase OS=Canis lupus familiaris OX=9615 GN=PFKP PE=3 SV=3	C_familiaris	5	5	8	5
High	F1PG13	Ubiquitin conjugating enzyme E2 O OS=Canis lupus familiaris OX=9615 GN=UBE2O PE=4 SV=3	C_familiaris	5	5	7	5
High	F1PQ45	Integrin subunit alpha 11 OS=Canis lupus familiaris OX=9615 GN=ITGA11 PE=3 SV=3	C_familiaris	5	5	7	5
High	E2R833	Leucine rich alpha-2-glycoprotein 1 OS=Canis lupus familiaris OX=9615 GN=LRG1 PE=4 SV=3	C_familiaris	5	5	6	5
High	Q6UKZ8	Growth/differentiation factor 8 OS=Canis lupus familiaris OX=9615 GN=MSTN PE=2 SV=1	C_familiaris	5	5	6	5
High	F2Z4Q6	Serum albumin OS=Canis lupus familiaris OX=9615 GN=AFP PE=4 SV=2	C_familiaris	62	97	22853	4
High	A0A5F4BYJ5	Uncharacterized protein OS=Canis lupus familiaris OX=9615 PE=4 SV=1	C_familiaris	30	69	5739	4
High	J9PAD1	Uncharacterized protein OS=Canis lupus familiaris OX=9615 PE=4 SV=2	C_familiaris	79	140	3561	4
High	Q6Q7P4	Protein 4.1 OS=Canis lupus familiaris OX=9615 GN=EPB41 PE=2 SV=1	C_familiaris	37	57	1327	4
High	L7N0I0	Ig-like domain-containing protein OS=Canis lupus familiaris OX=9615 PE=4 SV=2	C_familiaris	8	23	1145	4
High	Q28259	Glyceraldehyde-3-phosphate dehydrogenase OS=Canis lupus familiaris OX=9615 GN=GAPDH PE=2 SV=3	C_familiaris	14	25	505	4
High	A0A5F4BYG2	Uncharacterized protein OS=Canis lupus familiaris OX=9615 PE=4 SV=1	C_familiaris	5	9	310	4
High	F1PVP9	RAB1B, member RAS oncogene family OS=Canis lupus familiaris OX=9615 GN=RAB1B PE=4 SV=3	C_familiaris	11	15	266	4
High	A0A5F4C3X9	Actinin alpha 4 OS=Canis lupus familiaris OX=9615 GN=ACTN4 PE=4 SV=1	C_familiaris	34	41	260	4
High	A0A5F4CS96	Uncharacterized protein OS=Canis lupus familiaris OX=9615 GN=LOC106557476 PE=4 SV=1	C_familiaris	16	18	226	4
High	P62822	Ras-related protein Rab-1A OS=Canis lupus familiaris OX=9615 GN=RAB1A PE=1 SV=3	C_familiaris	11	13	212	4
High	A0A5F4DER9	Aquaporin-1 OS=Canis lupus familiaris OX=9615 GN=AQP1 PE=4 SV=1	C_familiaris	4	8	209	4
High	E2RBC3	Tubulin alpha chain OS=Canis lupus familiaris OX=9615 GN=TUBA4A PE=3 SV=2	C_familiaris	16	17	184	4
High	A0A5F4CP54	Uncharacterized protein OS=Canis lupus familiaris OX=9615 PE=4 SV=1	C_familiaris	4	8	178	4
High	F1PDG4	Uncharacterized protein OS=Canis lupus familiaris OX=9615 GN=UBB PE=4 SV=2	C_familiaris	4	4	164	4
High	F2Z4P9	Ras-related protein Rab-10 OS=Canis lupus familiaris OX=9615 GN=RAB10 PE=4 SV=1	C_familiaris	6	6	156	4
High	Q3BCQ5	Ammonium transporter Rh type A OS=Canis lupus familiaris OX=9615 GN=RHAG PE=2 SV=1	C_familiaris	4	5	116	4
High	P62999	Ras-related C3 botulinum toxin substrate 1 OS=Canis lupus familiaris OX=9615 GN=RAC1 PE=2 SV=1	C_familiaris	7	9	106	4
High	Q3BCQ6	Rh antigen-like protein OS=Canis lupus familiaris OX=9615 GN=Rh30 PE=2 SV=1	C_familiaris	4	5	100	4
High	E2QW69	RAB5B, member RAS oncogene family OS=Canis lupus familiaris OX=9615 GN=RAB5B PE=4 SV=1	C_familiaris	7	9	93	4
High	Q50KA9	Nucleoside diphosphate kinase A OS=Canis lupus familiaris OX=9615 GN=NME1 PE=2 SV=1	C_familiaris	6	7	89	4
High	A0A5F4CT62	Uncharacterized protein OS=Canis lupus familiaris OX=9615 GN=YWHAQ PE=4 SV=1	C_familiaris	8	11	87	4
High	A0A5F4BUJ7	Uncharacterized protein OS=Canis lupus familiaris OX=9615 PE=4 SV=1	C_familiaris	5	6	85	4
High	P56595	Apolipoprotein C-I OS=Canis lupus familiaris OX=9615 GN=APOC1 PE=1 SV=1	C_familiaris	4	4	84	4
High	A0A5F4BZ45	RAB35, member RAS oncogene family OS=Canis lupus familiaris OX=9615 GN=RAB35 PE=4 SV=1	C_familiaris	5	5	83	4
High	E2RC20	Nucleoside diphosphate kinase OS=Canis lupus familiaris OX=9615 GN=NME2 PE=3 SV=3	C_familiaris	6	6	77	4
High	E2REF3	Urea transporter OS=Canis lupus familiaris OX=9615 GN=SLC14A1 PE=3 SV=3	C_familiaris	5	9	70	4
High	A0A5F4CRP0	Uncharacterized protein OS=Canis lupus familiaris OX=9615 GN=CHMP5 PE=4 SV=1	C_familiaris	4	6	53	4
High	A0A5F4CC82	ADP ribosylation factor 4 OS=Canis lupus familiaris OX=9615 GN=ARF4 PE=4 SV=1	C_familiaris	6	6	53	4
High	J9NX28	RAS like proto-oncogene A OS=Canis lupus familiaris OX=9615 GN=RALA PE=4 SV=1	C_familiaris	7	8	50	4
High	A0A5F4CAX2	Uncharacterized protein OS=Canis lupus familiaris OX=9615 PE=4 SV=1	C_familiaris	4	5	48	4
High	F1P6D7	CD47 molecule OS=Canis lupus familiaris OX=9615 GN=CD47 PE=4 SV=3	C_familiaris	4	6	47	4
High	F1PEJ5	Tetraspanin OS=Canis lupus familiaris OX=9615 GN=TSPAN33 PE=3 SV=3	C_familiaris	4	4	44	4
High	G1K2D7	Coagulation factor IX OS=Canis lupus familiaris OX=9615 GN=F9 PE=3 SV=1	C_familiaris	4	5	40	4
High	E2RMC1	ST13 Hsp70 interacting protein OS=Canis lupus familiaris OX=9615 GN=ST13 PE=4 SV=3	C_familiaris	6	6	40	4
High	J9P346	SCY domain-containing protein OS=Canis lupus familiaris OX=9615 GN=PPBP PE=3 SV=1	C_familiaris	4	4	40	4
High	G1K265	Lysozyme OS=Canis lupus familiaris OX=9615 GN=LYZ PE=2 SV=1	C_familiaris	4	4	38	4
High	E2RC10	Synaptophysin like 1 OS=Canis lupus familiaris OX=9615 GN=SYPL1 PE=4 SV=3	C_familiaris	4	4	33	4
High	F6XKC0	Complement C8 gamma chain OS=Canis lupus familiaris OX=9615 GN=C8G PE=3 SV=2	C_familiaris	4	6	32	4
High	F1PG85	Solute carrier family 44 member 2 OS=Canis lupus familiaris OX=9615 GN=SLC44A2 PE=3 SV=3	C_familiaris	4	4	32	4
High	J9NTG7	CD55 molecule OS=Canis lupus familiaris OX=9615 GN=CD55 PE=4 SV=2	C_familiaris	4	5	31	4
High	A0A5F4BU46	Uncharacterized protein OS=Canis lupus familiaris OX=9615 PE=4 SV=1	C_familiaris	6	10	26	4
High	E2RNV4	G protein-coupled receptor class C group 5 member D OS=Canis lupus familiaris OX=9615 GN=GPRC5D PE=4 SV=2	C_familiaris	4	4	26	4
High	A0A5F4C0Q1	Syntaxin 7 OS=Canis lupus familiaris OX=9615 GN=STX7 PE=4 SV=1	C_familiaris	4	4	21	4
High	E2QWP1	BRO1 domain and CAAX motif containing OS=Canis lupus familiaris OX=9615 GN=BROX PE=4 SV=1	C_familiaris	4	4	20	4
High	A0A5F4D061	Solute carrier family 2, facilitated glucose transporter member 3 OS=Canis lupus familiaris OX=9615 GN=SLC2A3 PE=4 SV=1	C_familiaris	4	5	20	4
High	A0A5F4DBI9	Vesicle associated membrane protein 3 OS=Canis lupus familiaris OX=9615 GN=VAMP3 PE=4 SV=1	C_familiaris	4	5	19	4
High	J9P2K0	Fibulin 2 OS=Canis lupus familiaris OX=9615 GN=FBLN2 PE=4 SV=1	C_familiaris	4	8	18	4
High	E2QW34	Proteasome subunit beta OS=Canis lupus familiaris OX=9615 GN=PSMB2 PE=3 SV=1	C_familiaris	4	4	18	4
High	F1PEM7	Insulin like growth factor binding protein 2 OS=Canis lupus familiaris OX=9615 GN=IGFBP2 PE=4 SV=2	C_familiaris	4	5	17	4
High	F1PD34	Secreted phosphoprotein 2 OS=Canis lupus familiaris OX=9615 GN=SPP2 PE=4 SV=2	C_familiaris	4	4	16	4
High	A0A5F4CXZ9	Uncharacterized protein OS=Canis lupus familiaris OX=9615 GN=MYL6 PE=4 SV=1	C_familiaris	4	4	16	4
High	A0A5F4CT58	Thioredoxin reductase 2 OS=Canis lupus familiaris OX=9615 GN=TXNRD2 PE=4 SV=1	C_familiaris	4	4	16	4
High	E2R0P3	Isochorismatase domain containing 1 OS=Canis lupus familiaris OX=9615 GN=ISOC1 PE=4 SV=2	C_familiaris	4	4	15	4
High	J9P8J3	Heterogeneous nuclear ribonucleoprotein K OS=Canis lupus familiaris OX=9615 GN=HNRNPK PE=4 SV=2	C_familiaris	4	4	15	4
High	A0A5F4CYJ6	Aldehyde dehydrogenase 16 family member A1 OS=Canis lupus familiaris OX=9615 GN=ALDH16A1 PE=4 SV=1	C_familiaris	4	4	15	4
High	F1PLM7	Transmembrane protein 106B OS=Canis lupus familiaris OX=9615 GN=TMEM106B PE=4 SV=3	C_familiaris	4	4	15	4
High	H9KUV5	Pyruvate kinase OS=Canis lupus familiaris OX=9615 GN=PKLR PE=3 SV=1	C_familiaris	5	5	15	4
High	E2QY31	Platelet-activating factor acetylhydrolase IB subunit alpha OS=Canis lupus familiaris OX=9615 GN=PAFAH1B1 PE=3 SV=1	C_familiaris	4	4	14	4
High	A0A5F4BQK3	Lysosomal associated membrane protein 2 OS=Canis lupus familiaris OX=9615 GN=LAMP2 PE=4 SV=1	C_familiaris	4	4	14	4
High	A0A5F4CST2	Tetraspanin 14 OS=Canis lupus familiaris OX=9615 GN=TSPAN14 PE=4 SV=1	C_familiaris	4	4	14	4
High	A0A5F4BP23	Proteasome 26S subunit, non-ATPase 12 OS=Canis lupus familiaris OX=9615 GN=PSMD12 PE=4 SV=1	C_familiaris	4	4	14	4
High	E2RIU2	Charged multivesicular body protein 2A OS=Canis lupus familiaris OX=9615 GN=CHMP2A PE=4 SV=2	C_familiaris	4	4	14	4
High	Q53VB8	Ferritin light chain OS=Canis lupus familiaris OX=9615 GN=FTL PE=2 SV=3	C_familiaris	4	5	13	4
High	A0A5F4CWT6	Arrestin beta 1 OS=Canis lupus familiaris OX=9615 GN=ARRB1 PE=4 SV=1	C_familiaris	4	4	13	4
High	A0A5F4CSM6	Cell division cycle 37 OS=Canis lupus familiaris OX=9615 GN=CDC37 PE=4 SV=1	C_familiaris	4	4	13	4
High	J9NWC3	MYC target 1 OS=Canis lupus familiaris OX=9615 GN=MYCT1 PE=4 SV=2	C_familiaris	4	4	12	4
High	F1PDJ7	Ig-like domain-containing protein OS=Canis lupus familiaris OX=9615 GN=AZGP1 PE=3 SV=2	C_familiaris	4	4	12	4
High	E2R985	Actin-related protein 2/3 complex subunit 3 OS=Canis lupus familiaris OX=9615 GN=ARPC3 PE=3 SV=3	C_familiaris	4	5	11	4
High	E2R0M4	N-acetylglucosamine-1-phosphate transferase subunit gamma OS=Canis lupus familiaris OX=9615 GN=GNPTG PE=4 SV=3	C_familiaris	4	4	11	4
High	Q8MJD1	Neutrophil elastase OS=Canis lupus familiaris OX=9615 GN=ELANE PE=2 SV=1	C_familiaris	4	5	10	4
High	E2R0A0	Peroxiredoxin like 2A OS=Canis lupus familiaris OX=9615 GN=PRXL2A PE=4 SV=3	C_familiaris	4	4	10	4
High	A0A5F4C1B3	Transgelin 2 OS=Canis lupus familiaris OX=9615 GN=TAGLN2 PE=4 SV=1	C_familiaris	4	4	10	4
High	F1PZW8	G protein subunit alpha 13 OS=Canis lupus familiaris OX=9615 GN=GNA13 PE=4 SV=3	C_familiaris	4	4	10	4
High	F1PWT3	Deoxyribonuclease OS=Canis lupus familiaris OX=9615 GN=DNASE1L1 PE=3 SV=2	C_familiaris	4	4	10	4
High	A0A5F4CGL6	G protein-coupled receptor kinase 6 OS=Canis lupus familiaris OX=9615 GN=GRK6 PE=4 SV=1	C_familiaris	4	4	10	4
High	F1PAF2	Activating transcription factor 6 OS=Canis lupus familiaris OX=9615 GN=ATF6 PE=4 SV=3	C_familiaris	4	4	9	4
High	A0A5F4CL79	Biotinidase OS=Canis lupus familiaris OX=9615 GN=BTD PE=4 SV=1	C_familiaris	4	4	9	4
High	E2RI17	Sorcin OS=Canis lupus familiaris OX=9615 GN=SRI PE=4 SV=3	C_familiaris	4	5	9	4
High	E2R0L9	T-complex 1 OS=Canis lupus familiaris OX=9615 GN=TCP1 PE=3 SV=1	C_familiaris	4	4	9	4
High	F1PHZ3	Phosphatidylinositol transfer protein beta OS=Canis lupus familiaris OX=9615 GN=PITPNB PE=4 SV=3	C_familiaris	4	4	9	4
High	A0A5F4C290	Septin 9 OS=Canis lupus familiaris OX=9615 GN=SEPTIN9 PE=4 SV=1	C_familiaris	4	4	9	4
High	A0A5F4DDF5	Mannose-6-phosphate receptor, cation dependent OS=Canis lupus familiaris OX=9615 GN=M6PR PE=4 SV=1	C_familiaris	4	4	8	4
High	A0A5F4BSS2	Stress-70 protein, mitochondrial OS=Canis lupus familiaris OX=9615 GN=HSPA9 PE=4 SV=1	C_familiaris	4	5	8	4
High	F1PK43	Nuclear autoantigenic sperm protein OS=Canis lupus familiaris OX=9615 GN=NASP PE=4 SV=2	C_familiaris	4	4	8	4
High	F1PJE7	ATPase copper transporting beta OS=Canis lupus familiaris OX=9615 GN=ATP7B PE=3 SV=3	C_familiaris	4	4	8	4
High	A0A5F4DL21	Uncharacterized protein OS=Canis lupus familiaris OX=9615 GN=NCSTN PE=4 SV=1	C_familiaris	4	4	8	4
High	F1PQ29	Integrin subunit alpha 4 OS=Canis lupus familiaris OX=9615 GN=ITGA4 PE=3 SV=3	C_familiaris	4	4	7	4
High	F1PP08	Dipeptidyl peptidase 4 OS=Canis lupus familiaris OX=9615 GN=DPP4 PE=3 SV=3	C_familiaris	4	4	6	4
High	E2R691	Peptidyl arginine deiminase 3 OS=Canis lupus familiaris OX=9615 GN=PADI3 PE=4 SV=2	C_familiaris	4	4	6	4
High	E2R7S1	Calcium-transporting ATPase OS=Canis lupus familiaris OX=9615 GN=ATP2B1 PE=3 SV=3	C_familiaris	4	4	6	4
High	F1PKF1	Cell cycle control protein OS=Canis lupus familiaris OX=9615 GN=TMEM30A PE=3 SV=3	C_familiaris	4	4	6	4
High	A0A5F4BYG4	Spectrin alpha, non-erythrocytic 1 OS=Canis lupus familiaris OX=9615 GN=SPTAN1 PE=4 SV=1	C_familiaris	4	4	6	4
High	F1Q331	T-complex protein 1 subunit delta OS=Canis lupus familiaris OX=9615 GN=CCT4 PE=3 SV=2	C_familiaris	4	4	5	4
High	A0A5F4BTP4	Adaptor related protein complex 1 subunit beta 1 OS=Canis lupus familiaris OX=9615 GN=AP1B1 PE=4 SV=1	C_familiaris	4	4	5	4
High	E2RQC0	C-type lectin domain family 3 member A OS=Canis lupus familiaris OX=9615 GN=CLEC3A PE=4 SV=1	C_familiaris	4	4	4	4
High	A0A5F4BTS3	WASP actin nucleation promoting factor OS=Canis lupus familiaris OX=9615 GN=WAS PE=4 SV=1	C_familiaris	4	4	4	4
High	E2REK5	Transportin 3 OS=Canis lupus familiaris OX=9615 GN=TNPO3 PE=4 SV=3	C_familiaris	4	4	4	4
High	J9PBN6	Uncharacterized protein OS=Canis lupus familiaris OX=9615 GN=LOC477699 PE=4 SV=1	C_familiaris	86	177	9329	3
High	P60524	Hemoglobin subunit beta OS=Canis lupus familiaris OX=9615 GN=HBB PE=1 SV=1	C_familiaris	18	29	4187	3
High	A0A5F4BNP2	Uncharacterized protein OS=Canis lupus familiaris OX=9615 PE=4 SV=1	C_familiaris	27	63	3893	3
High	A0A5F4BR98	Uncharacterized protein OS=Canis lupus familiaris OX=9615 PE=4 SV=1	C_familiaris	9	26	1327	3
High	E2R886	Kininogen 1 OS=Canis lupus familiaris OX=9615 GN=KNG1 PE=4 SV=3	C_familiaris	25	41	1197	3
High	J9NZT2	Ig-like domain-containing protein OS=Canis lupus familiaris OX=9615 PE=4 SV=2	C_familiaris	7	22	1197	3
High	F1Q418	Inter-alpha-trypsin inhibitor heavy chain 1 OS=Canis lupus familiaris OX=9615 GN=ITIH1 PE=4 SV=2	C_familiaris	27	60	959	3
High	A0A5F4CE12	Uncharacterized protein OS=Canis lupus familiaris OX=9615 PE=4 SV=1	C_familiaris	6	12	935	3
High	J9PAL2	Ig-like domain-containing protein OS=Canis lupus familiaris OX=9615 PE=4 SV=2	C_familiaris	10	21	688	3
High	A0A5F4CSD5	Uncharacterized protein OS=Canis lupus familiaris OX=9615 PE=4 SV=1	C_familiaris	6	18	661	3
High	F1PBT3	Fructose-bisphosphate aldolase OS=Canis lupus familiaris OX=9615 GN=ALDOA PE=3 SV=3	C_familiaris	21	31	499	3
High	E2R2K4	RAP1B, member of RAS oncogene family OS=Canis lupus familiaris OX=9615 GN=RAP1B PE=4 SV=1	C_familiaris	11	22	499	3
High	A0A5F4DJ18	Uncharacterized protein OS=Canis lupus familiaris OX=9615 PE=4 SV=1	C_familiaris	4	14	433	3
High	F1PQ99	Mannan binding lectin serine peptidase 1 OS=Canis lupus familiaris OX=9615 GN=MASP1 PE=3 SV=2	C_familiaris	16	20	335	3
High	E2R2M7	RAP1A, member of RAS oncogene family OS=Canis lupus familiaris OX=9615 GN=RAP1A PE=4 SV=1	C_familiaris	11	16	308	3
High	A0A5F4DAX5	Uncharacterized protein OS=Canis lupus familiaris OX=9615 PE=4 SV=1	C_familiaris	4	8	261	3
High	A0A5F4CBH6	Uncharacterized protein OS=Canis lupus familiaris OX=9615 PE=4 SV=1	C_familiaris	5	7	207	3
High	A7VLI5	Glycophorin C OS=Canis lupus familiaris OX=9615 GN=Gypc PE=2 SV=1	C_familiaris	3	10	201	3
High	A0A5F4D5V1	Fibulin 1 OS=Canis lupus familiaris OX=9615 GN=FBLN1 PE=4 SV=1	C_familiaris	16	21	195	3
High	A0A5F4C477	Fibulin 1 OS=Canis lupus familiaris OX=9615 GN=FBLN1 PE=4 SV=1	C_familiaris	16	21	194	3
High	A0A5F4DCE0	Tropomyosin 1 OS=Canis lupus familiaris OX=9615 GN=TPM1 PE=4 SV=1	C_familiaris	12	12	137	3
High	F1PZH8	Bridging integrator 2 OS=Canis lupus familiaris OX=9615 GN=BIN2 PE=4 SV=3	C_familiaris	18	19	133	3
High	F1PF90	Ig-like domain-containing protein OS=Canis lupus familiaris OX=9615 PE=4 SV=3	C_familiaris	6	7	126	3
High	P01784	Ig heavy chain V region GOM OS=Canis lupus familiaris OX=9615 PE=1 SV=1	C_familiaris	4	6	117	3
High	E2RPB8	C-type lectin domain family 3 member B OS=Canis lupus familiaris OX=9615 GN=CLEC3B PE=4 SV=3	C_familiaris	5	5	95	3
High	E2RHG2	Thioredoxin domain-containing protein OS=Canis lupus familiaris OX=9615 GN=PRDX1 PE=4 SV=2	C_familiaris	5	7	84	3
High	P02677	Fibrinogen beta chain (Fragment) OS=Canis lupus familiaris OX=9615 GN=FGB PE=1 SV=2	C_familiaris	4	4	81	3
High	L7N0I1	Uncharacterized protein OS=Canis lupus familiaris OX=9615 GN=MYL12B PE=4 SV=1	C_familiaris	8	12	73	3
High	E2RPA8	Tetraspanin OS=Canis lupus familiaris OX=9615 GN=CD151 PE=3 SV=3	C_familiaris	3	3	69	3
High	J9NRH5	Tyrosine 3-monooxygenase/tryptophan 5-monooxygenase activation protein gamma OS=Canis lupus familiaris OX=9615 GN=YWHAG PE=3 SV=2	C_familiaris	7	10	69	3
High	A0A5F4C8H0	Glucosamine-6-phosphate deaminase 2 OS=Canis lupus familiaris OX=9615 GN=GNPDA2 PE=4 SV=1	C_familiaris	7	8	66	3
High	F1P634	Myosin light chain 9 OS=Canis lupus familiaris OX=9615 GN=MYL9 PE=4 SV=2	C_familiaris	8	11	59	3
High	F1PH61	Ig-like domain-containing protein OS=Canis lupus familiaris OX=9615 PE=4 SV=3	C_familiaris	5	5	57	3
High	A0A5F4CPW0	Tyrosine 3-monooxygenase/tryptophan 5-monooxygenase activation protein epsilon OS=Canis lupus familiaris OX=9615 GN=YWHAE PE=4 SV=1	C_familiaris	5	6	56	3
High	A0A5F4C4W3	Uncharacterized protein OS=Canis lupus familiaris OX=9615 PE=4 SV=1	C_familiaris	8	10	52	3
High	A0A5F4DFV1	Apolipoprotein C-III OS=Canis lupus familiaris OX=9615 GN=APOC3 PE=4 SV=1	C_familiaris	3	5	51	3
High	J9P732	EF-hand domain-containing protein OS=Canis lupus familiaris OX=9615 GN=S100A9 PE=3 SV=2	C_familiaris	3	6	46	3
High	F1PEZ2	Nucleoside diphosphate kinase OS=Canis lupus familiaris OX=9615 GN=NME4 PE=3 SV=3	C_familiaris	7	7	44	3
High	E2RLB2	RAS like proto-oncogene B OS=Canis lupus familiaris OX=9615 GN=RALB PE=4 SV=1	C_familiaris	6	7	40	3
High	J9P4X0	Nucleosome assembly protein 1 like 4 OS=Canis lupus familiaris OX=9615 GN=NAP1L4 PE=3 SV=2	C_familiaris	4	6	35	3
High	E2RCF9	Uncharacterized protein OS=Canis lupus familiaris OX=9615 GN=PCBP2 PE=4 SV=3	C_familiaris	6	6	33	3
High	E2QW85	Elongation factor 1-alpha OS=Canis lupus familiaris OX=9615 PE=3 SV=2	C_familiaris	5	5	31	3
High	J9NWA8	Uncharacterized protein OS=Canis lupus familiaris OX=9615 GN=FABP5 PE=4 SV=2	C_familiaris	3	4	29	3
High	F6V040	AA_permease_C domain-containing protein OS=Canis lupus familiaris OX=9615 PE=4 SV=2	C_familiaris	4	4	29	3
High	J9P4N4	CD59 molecule OS=Canis lupus familiaris OX=9615 GN=CD59 PE=4 SV=2	C_familiaris	3	5	28	3
High	F1PL20	Serine incorporator 1 OS=Canis lupus familiaris OX=9615 GN=SERINC1 PE=4 SV=2	C_familiaris	3	3	27	3
High	A0M8V0	F-actin-capping protein subunit alpha-2 OS=Canis lupus familiaris OX=9615 GN=CAPZA2 PE=3 SV=1	C_familiaris	5	6	25	3
High	L7N0L3	Histone H4 OS=Canis lupus familiaris OX=9615 PE=3 SV=2	C_familiaris	3	4	25	3
High	F1PKL6	Ig-like domain-containing protein OS=Canis lupus familiaris OX=9615 PE=4 SV=3	C_familiaris	3	3	23	3
High	J9NZ45	RAP2B, member of RAS oncogene family OS=Canis lupus familiaris OX=9615 GN=RAP2B PE=4 SV=2	C_familiaris	3	3	21	3
High	L7N0E5	Ig-like domain-containing protein OS=Canis lupus familiaris OX=9615 PE=4 SV=2	C_familiaris	3	3	21	3
High	A0A5F4CDV8	ATPase phospholipid transporting 8A1 OS=Canis lupus familiaris OX=9615 GN=ATP8A1 PE=4 SV=1	C_familiaris	3	4	18	3
High	E2RAL0	Rho GDP dissociation inhibitor beta OS=Canis lupus familiaris OX=9615 GN=ARHGDIB PE=4 SV=1	C_familiaris	3	4	16	3
High	P18470	DLA class II histocompatibility antigen, DR-1 beta chain OS=Canis lupus familiaris OX=9615 PE=2 SV=1	C_familiaris	3	5	16	3
High	E2QUY7	Proteasome 26S subunit, non-ATPase 3 OS=Canis lupus familiaris OX=9615 GN=PSMD3 PE=4 SV=2	C_familiaris	3	3	16	3
High	E2QTD8	Myo-inositol oxygenase OS=Canis lupus familiaris OX=9615 GN=MIOX PE=4 SV=2	C_familiaris	3	3	16	3
High	J9P5F0	Rho GTPase activating protein 45 OS=Canis lupus familiaris OX=9615 GN=ARHGAP45 PE=3 SV=2	C_familiaris	3	3	15	3
High	F1PC59	Peroxiredoxin 6 OS=Canis lupus familiaris OX=9615 GN=PRDX6 PE=4 SV=2	C_familiaris	3	3	15	3
High	F1PIT4	Tetraspanin OS=Canis lupus familiaris OX=9615 GN=CD63 PE=3 SV=2	C_familiaris	3	3	15	3
High	A0A5F4DIK8	Four and a half LIM domains 1 OS=Canis lupus familiaris OX=9615 GN=FHL1 PE=4 SV=1	C_familiaris	3	3	14	3
High	E2RA67	C-C motif chemokine OS=Canis lupus familiaris OX=9615 GN=CCL14 PE=3 SV=2	C_familiaris	3	3	14	3
High	A0A5F4DKA2	Hemoglobin subunit mu OS=Canis lupus familiaris OX=9615 GN=HBM PE=4 SV=1	C_familiaris	3	3	14	3
High	E2RD70	COP9 signalosome subunit 3 OS=Canis lupus familiaris OX=9615 GN=COPS3 PE=4 SV=1	C_familiaris	3	3	14	3
High	F6Y6B4	SH3 domain binding glutamate rich protein like 2 OS=Canis lupus familiaris OX=9615 GN=SH3BGRL2 PE=4 SV=2	C_familiaris	3	3	14	3
High	E2RAK7	Apolipoprotein A-II OS=Canis lupus familiaris OX=9615 GN=APOA2 PE=1 SV=2	C_familiaris	3	3	13	3
High	A0A5F4D669	Charged multivesicular body protein 6 OS=Canis lupus familiaris OX=9615 GN=CHMP6 PE=4 SV=1	C_familiaris	3	3	13	3
High	F1PQ91	Insulin like growth factor binding protein 3 OS=Canis lupus familiaris OX=9615 GN=IGFBP3 PE=4 SV=2	C_familiaris	3	3	13	3
High	A0A5F4CLB4	Abraxas 2, BRISC complex subunit OS=Canis lupus familiaris OX=9615 GN=ABRAXAS2 PE=4 SV=1	C_familiaris	3	3	13	3
High	F1PBM2	Vesicle trafficking 1 OS=Canis lupus familiaris OX=9615 GN=VTA1 PE=4 SV=2	C_familiaris	3	4	12	3
High	E2RH46	Uncharacterized protein OS=Canis lupus familiaris OX=9615 PE=4 SV=3	C_familiaris	3	3	12	3
High	E2RAC6	Vacuolar proton pump subunit B OS=Canis lupus familiaris OX=9615 GN=ATP6V1B2 PE=3 SV=2	C_familiaris	3	4	12	3
High	E2RMK6	Eukaryotic translation initiation factor 2 subunit gamma OS=Canis lupus familiaris OX=9615 GN=EIF2S3 PE=4 SV=1	C_familiaris	3	3	12	3
High	F1PDQ4	Cytoplasmic FMR1-interacting protein OS=Canis lupus familiaris OX=9615 GN=CYFIP1 PE=3 SV=3	C_familiaris	7	7	11	3
High	E2RM35	Pyrroline-5-carboxylate reductase OS=Canis lupus familiaris OX=9615 GN=PYCR3 PE=3 SV=2	C_familiaris	3	3	11	3
High	A0A5F4C041	Uncharacterized protein OS=Canis lupus familiaris OX=9615 GN=FOLR2 PE=4 SV=1	C_familiaris	3	3	11	3
High	E2RBL2	Secretory carrier-associated membrane protein OS=Canis lupus familiaris OX=9615 GN=SCAMP2 PE=3 SV=3	C_familiaris	3	3	11	3
High	E2QX78	Solute carrier family 43 member 3 OS=Canis lupus familiaris OX=9615 GN=SLC43A3 PE=4 SV=1	C_familiaris	3	3	11	3
High	J9P972	DAZ associated protein 1 OS=Canis lupus familiaris OX=9615 GN=DAZAP1 PE=4 SV=2	C_familiaris	3	3	11	3
High	A0A5F4CM86	Tetratricopeptide repeat domain 38 OS=Canis lupus familiaris OX=9615 GN=TTC38 PE=4 SV=1	C_familiaris	3	3	11	3
High	J9P6K0	RAP2A, member of RAS oncogene family OS=Canis lupus familiaris OX=9615 GN=RAP2A PE=4 SV=2	C_familiaris	5	5	10	3
High	F1PQS8	CKLF like MARVEL transmembrane domain containing 6 OS=Canis lupus familiaris OX=9615 GN=CMTM6 PE=4 SV=2	C_familiaris	3	3	10	3
High	A0A5F4D2Z7	Casein kinase 1 gamma 1 OS=Canis lupus familiaris OX=9615 GN=CSNK1G1 PE=4 SV=1	C_familiaris	3	4	10	3
High	J9NRZ2	RAB18, member RAS oncogene family OS=Canis lupus familiaris OX=9615 GN=RAB18 PE=4 SV=1	C_familiaris	3	3	10	3
High	E2RNV3	PITH domain containing 1 OS=Canis lupus familiaris OX=9615 GN=PITHD1 PE=4 SV=3	C_familiaris	3	3	10	3
High	F1P9K6	Junctional adhesion molecule 3 OS=Canis lupus familiaris OX=9615 GN=JAM3 PE=4 SV=2	C_familiaris	3	3	9	3
High	J9P5M2	Lymphocyte specific protein 1 OS=Canis lupus familiaris OX=9615 GN=LSP1 PE=4 SV=2	C_familiaris	3	3	9	3
High	J9P3M1	LIM and SH3 protein 1 OS=Canis lupus familiaris OX=9615 GN=LASP1 PE=4 SV=2	C_familiaris	3	4	9	3
High	F1PZA1	Isocitrate dehydrogenase [NADP] OS=Canis lupus familiaris OX=9615 GN=IDH1 PE=2 SV=1	C_familiaris	3	3	9	3
High	J9P0G7	Aamy domain-containing protein OS=Canis lupus familiaris OX=9615 GN=LOC607314 PE=3 SV=2	C_familiaris	3	4	9	3
High	J9NYK7	Uncharacterized protein OS=Canis lupus familiaris OX=9615 GN=MYADM PE=4 SV=1	C_familiaris	3	3	9	3
High	A0A5F4D8G2	NSF attachment protein alpha OS=Canis lupus familiaris OX=9615 GN=NAPA PE=4 SV=1	C_familiaris	3	3	9	3
High	J9PB28	Fibrinogen like 2 OS=Canis lupus familiaris OX=9615 GN=FGL2 PE=4 SV=1	C_familiaris	3	3	9	3
High	A0A5F4CSG1	Adenosine kinase OS=Canis lupus familiaris OX=9615 GN=ADK PE=4 SV=1	C_familiaris	3	3	9	3
High	F1PD37	Serine/threonine-protein phosphatase 2A activator OS=Canis lupus familiaris OX=9615 GN=PTPA PE=3 SV=3	C_familiaris	3	3	9	3
High	J9PA20	Uncharacterized protein OS=Canis lupus familiaris OX=9615 PE=4 SV=2	C_familiaris	4	4	8	3
High	E2R5J0	Pentaxin OS=Canis lupus familiaris OX=9615 GN=CRP PE=3 SV=2	C_familiaris	3	3	8	3
High	F1PW12	Coproporphyrinogen oxidase OS=Canis lupus familiaris OX=9615 GN=CPOX PE=4 SV=3	C_familiaris	3	3	8	3
High	F1PI70	Transforming growth factor beta OS=Canis lupus familiaris OX=9615 GN=TGFB1 PE=3 SV=2	C_familiaris	3	3	8	3
High	J9P9M0	RAB32, member RAS oncogene family OS=Canis lupus familiaris OX=9615 GN=RAB32 PE=4 SV=2	C_familiaris	3	4	8	3
High	E2RE03	Cadherin 5 OS=Canis lupus familiaris OX=9615 GN=CDH5 PE=4 SV=3	C_familiaris	3	3	8	3
High	J9JHE0	Protein kinase cGMP-dependent 1 OS=Canis lupus familiaris OX=9615 GN=PRKG1 PE=3 SV=2	C_familiaris	3	3	8	3
High	A0A5F4D804	Voltage dependent anion channel 2 OS=Canis lupus familiaris OX=9615 GN=VDAC2 PE=4 SV=1	C_familiaris	3	3	8	3
High	E2R9R6	Programmed cell death 10 OS=Canis lupus familiaris OX=9615 GN=PDCD10 PE=4 SV=3	C_familiaris	3	3	8	3
High	J9P3J4	Uncharacterized protein OS=Canis lupus familiaris OX=9615 GN=SLC29A1 PE=4 SV=2	C_familiaris	3	3	8	3
High	A0A5F4D6J0	Protocadherin 1 OS=Canis lupus familiaris OX=9615 GN=PCDH1 PE=4 SV=1	C_familiaris	3	3	8	3
High	F6UXI8	Inosine-5'-monophosphate dehydrogenase OS=Canis lupus familiaris OX=9615 GN=IMPDH2 PE=3 SV=2	C_familiaris	3	3	8	3
High	F1PDM3	SEC13 homolog, nuclear pore and COPII coat complex component OS=Canis lupus familiaris OX=9615 GN=SEC13 PE=3 SV=2	C_familiaris	3	3	8	3
High	E2R9U8	Eukaryotic translation elongation factor 1 delta OS=Canis lupus familiaris OX=9615 GN=EEF1D PE=3 SV=3	C_familiaris	3	4	7	3
High	F1Q4J0	Glucosidase II alpha subunit OS=Canis lupus familiaris OX=9615 GN=GANAB PE=3 SV=2	C_familiaris	3	3	7	3
High	F1PI87	Obg-like ATPase 1 OS=Canis lupus familiaris OX=9615 GN=OLA1 PE=3 SV=3	C_familiaris	3	3	7	3
High	E2R2A1	Golgin A7 OS=Canis lupus familiaris OX=9615 GN=GOLGA7 PE=4 SV=2	C_familiaris	3	3	7	3
High	A0A5F4CE33	Triggering receptor expressed on myeloid cells 2 OS=Canis lupus familiaris OX=9615 GN=TREM2 PE=4 SV=1	C_familiaris	3	3	7	3
High	F1P9A7	Protein tweety homolog OS=Canis lupus familiaris OX=9615 GN=TTYH3 PE=3 SV=3	C_familiaris	3	3	7	3
High	A0A5F4CGS2	Uncharacterized protein OS=Canis lupus familiaris OX=9615 GN=GSTP1 PE=4 SV=1	C_familiaris	3	3	7	3
High	E2RQ54	Ig-like domain-containing protein OS=Canis lupus familiaris OX=9615 GN=LY6G6F PE=4 SV=1	C_familiaris	3	3	7	3
High	E2QSB5	Ephrin B1 OS=Canis lupus familiaris OX=9615 GN=EFNB1 PE=3 SV=1	C_familiaris	3	3	7	3
High	A0A5F4CLF7	Calmodulin 1 OS=Canis lupus familiaris OX=9615 GN=CALM1 PE=4 SV=1	C_familiaris	3	3	7	3
High	E2R5G6	RAS related OS=Canis lupus familiaris OX=9615 GN=RRAS PE=4 SV=1	C_familiaris	3	3	7	3
High	E2R7N4	Hematopoietic cell-specific Lyn substrate 1 OS=Canis lupus familiaris OX=9615 GN=HCLS1 PE=4 SV=2	C_familiaris	3	3	7	3
High	F1P9L1	S-methyl-5'-thioadenosine phosphorylase OS=Canis lupus familiaris OX=9615 GN=MTAP PE=3 SV=3	C_familiaris	3	3	6	3
High	A0A5F4D103	Fc fragment of IgE receptor II OS=Canis lupus familiaris OX=9615 GN=FCER2 PE=4 SV=1	C_familiaris	3	3	6	3
High	A0A5F4BRV8	Uncharacterized protein OS=Canis lupus familiaris OX=9615 GN=VIM PE=4 SV=1	C_familiaris	3	3	6	3
High	E2RB37	Protein disulfide isomerase family A member 6 OS=Canis lupus familiaris OX=9615 GN=PDIA6 PE=3 SV=1	C_familiaris	3	3	6	3
High	J9P3H7	UBA domain-containing protein OS=Canis lupus familiaris OX=9615 GN=DDI2 PE=4 SV=2	C_familiaris	3	3	6	3
High	A0A5F4DIK6	DnaJ heat shock protein family (Hsp40) member B2 OS=Canis lupus familiaris OX=9615 GN=DNAJB2 PE=4 SV=1	C_familiaris	3	3	6	3
High	E2RPY6	Cytoplasmic protein OS=Canis lupus familiaris OX=9615 GN=NCK2 PE=4 SV=2	C_familiaris	3	3	6	3
High	A0A5F4BUH8	Uncharacterized protein OS=Canis lupus familiaris OX=9615 GN=USP9X PE=4 SV=1	C_familiaris	3	3	6	3
High	A0A5F4CTQ3	LRR binding FLII interacting protein 1 OS=Canis lupus familiaris OX=9615 GN=LRRFIP1 PE=4 SV=1	C_familiaris	3	3	5	3
High	F1Q260	Lysosomal associated membrane protein 1 OS=Canis lupus familiaris OX=9615 GN=LAMP1 PE=3 SV=3	C_familiaris	3	3	5	3
High	A0A5F4CNH1	Thromboxane A synthase 1 OS=Canis lupus familiaris OX=9615 GN=TBXAS1 PE=4 SV=1	C_familiaris	3	3	5	3
High	J9NY79	Malate dehydrogenase OS=Canis lupus familiaris OX=9615 PE=3 SV=2	C_familiaris	3	3	5	3
High	A0A5F4D3P9	Uncharacterized protein OS=Canis lupus familiaris OX=9615 GN=HNRNPC PE=4 SV=1	C_familiaris	3	3	5	3
High	A0A5F4CNX1	AHNAK nucleoprotein OS=Canis lupus familiaris OX=9615 GN=AHNAK PE=4 SV=1	C_familiaris	3	3	5	3
High	F1PPI5	Amino acid transporter OS=Canis lupus familiaris OX=9615 GN=SLC1A5 PE=3 SV=2	C_familiaris	3	3	5	3
High	F1PEG6	Docking protein 2 OS=Canis lupus familiaris OX=9615 GN=DOK2 PE=4 SV=2	C_familiaris	3	3	5	3
High	J9P8N1	STAM binding protein OS=Canis lupus familiaris OX=9615 GN=STAMBP PE=4 SV=2	C_familiaris	3	3	5	3
High	E2RQI7	NGG1 interacting factor 3 like 1 OS=Canis lupus familiaris OX=9615 GN=NIF3L1 PE=4 SV=3	C_familiaris	3	3	5	3
High	E2QRU7	Cullin 2 OS=Canis lupus familiaris OX=9615 GN=CUL2 PE=3 SV=1	C_familiaris	3	3	5	3
High	A0A5F4CCP6	ANTXR cell adhesion molecule 1 OS=Canis lupus familiaris OX=9615 GN=ANTXR1 PE=4 SV=1	C_familiaris	3	3	4	3
High	F1PD77	Proteasome activator subunit 2 OS=Canis lupus familiaris OX=9615 GN=PSME2 PE=4 SV=2	C_familiaris	3	3	4	3
High	A0A5F4D881	Sushi domain containing 1 OS=Canis lupus familiaris OX=9615 GN=SUSD1 PE=4 SV=1	C_familiaris	3	3	4	3
High	A0A5F4CIR1	Nidogen 1 OS=Canis lupus familiaris OX=9615 GN=NID1 PE=4 SV=1	C_familiaris	3	3	4	3
High	A0A5F4BY69	Collagen type XII alpha 1 chain OS=Canis lupus familiaris OX=9615 GN=COL12A1 PE=4 SV=1	C_familiaris	3	3	4	3
High	E2R034	Molybdopterin molybdenumtransferase OS=Canis lupus familiaris OX=9615 GN=GPHN PE=3 SV=2	C_familiaris	3	3	4	3
High	A0A5F4D0A6	Aspartyl-tRNA synthetase OS=Canis lupus familiaris OX=9615 GN=DARS1 PE=4 SV=1	C_familiaris	3	3	4	3
High	A0A5K1UDZ7	Solute carrier family 12 member 4 OS=Canis lupus familiaris OX=9615 GN=SLC12A4 PE=4 SV=1	C_familiaris	3	3	3	3
High	J9P740	Thioredoxin like 1 OS=Canis lupus familiaris OX=9615 GN=TXNL1 PE=4 SV=2	C_familiaris	3	3	3	3
High	F1PYZ1	GLOBIN domain-containing protein OS=Canis lupus familiaris OX=9615 GN=LOC609402 PE=3 SV=3	C_familiaris	19	28	3882	2
High	H9GWR8	Ig-like domain-containing protein OS=Canis lupus familiaris OX=9615 PE=4 SV=2	C_familiaris	9	12	3811	2
High	J9NSQ1	Ig-like domain-containing protein OS=Canis lupus familiaris OX=9615 PE=4 SV=2	C_familiaris	9	13	3695	2
High	P60529	Hemoglobin subunit alpha OS=Canis lupus familiaris OX=9615 GN=HBA PE=1 SV=1	C_familiaris	11	12	1911	2
High	A0A5F4CSF0	Uncharacterized protein OS=Canis lupus familiaris OX=9615 PE=4 SV=1	C_familiaris	8	23	1460	2
High	A0A5F4BWC4	Uncharacterized protein OS=Canis lupus familiaris OX=9615 PE=4 SV=1	C_familiaris	9	25	1339	2
High	J9NYY8	Ig-like domain-containing protein OS=Canis lupus familiaris OX=9615 PE=4 SV=2	C_familiaris	8	25	1336	2
High	A0A5F4D2F2	Uncharacterized protein OS=Canis lupus familiaris OX=9615 PE=4 SV=1	C_familiaris	6	20	1189	2
High	A0A5F4CA42	Uncharacterized protein OS=Canis lupus familiaris OX=9615 PE=4 SV=1	C_familiaris	8	19	1112	2
High	A0A5F4CQG9	Uncharacterized protein OS=Canis lupus familiaris OX=9615 PE=4 SV=1	C_familiaris	6	19	1106	2
High	A0A5F4CI22	Uncharacterized protein OS=Canis lupus familiaris OX=9615 PE=4 SV=1	C_familiaris	6	19	1102	2
High	F2Z4N7	Actin alpha cardiac muscle 1 OS=Canis lupus familiaris OX=9615 GN=ACTC1 PE=3 SV=2	C_familiaris	16	24	1039	2
High	A0A5F4CWK7	Uncharacterized protein OS=Canis lupus familiaris OX=9615 PE=4 SV=1	C_familiaris	4	13	787	2
High	A0A5F4D8U5	Actin beta like 2 OS=Canis lupus familiaris OX=9615 GN=ACTBL2 PE=4 SV=1	C_familiaris	11	19	772	2
High	A0A5F4CKL2	Uncharacterized protein OS=Canis lupus familiaris OX=9615 PE=4 SV=1	C_familiaris	4	13	676	2
High	A0A5F4DCX2	Uncharacterized protein OS=Canis lupus familiaris OX=9615 PE=4 SV=1	C_familiaris	4	13	475	2
High	E2RJW7	Adducin 1 OS=Canis lupus familiaris OX=9615 GN=ADD1 PE=4 SV=3	C_familiaris	26	32	412	2
High	A0A5F4D5I3	Uncharacterized protein OS=Canis lupus familiaris OX=9615 PE=4 SV=1	C_familiaris	4	6	403	2
High	A0A5F4CSP7	Uncharacterized protein OS=Canis lupus familiaris OX=9615 PE=4 SV=1	C_familiaris	3	8	319	2
High	A0A5F4C5A8	Uncharacterized protein OS=Canis lupus familiaris OX=9615 PE=4 SV=1	C_familiaris	7	18	318	2
High	P01874	Ig mu chain C region OS=Canis lupus familiaris OX=9615 PE=1 SV=1	C_familiaris	3	3	282	2
High	A0A5F4CMS7	Uncharacterized protein OS=Canis lupus familiaris OX=9615 GN=KRT14 PE=4 SV=1	C_familiaris	16	18	261	2
High	A0A5F4DCA5	Uncharacterized protein OS=Canis lupus familiaris OX=9615 PE=4 SV=1	C_familiaris	5	7	258	2
High	A0A5F4CZV7	Uncharacterized protein OS=Canis lupus familiaris OX=9615 PE=4 SV=1	C_familiaris	2	5	216	2
High	L7N0I7	Tubulin beta chain OS=Canis lupus familiaris OX=9615 GN=TUBB4B PE=3 SV=1	C_familiaris	21	28	208	2
High	F1PRR4	Vasodilator-stimulated phosphoprotein OS=Canis lupus familiaris OX=9615 GN=VASP PE=3 SV=1	C_familiaris	15	22	208	2
High	F1PXU1	Spectrin beta chain OS=Canis lupus familiaris OX=9615 GN=SPTBN1 PE=3 SV=3	C_familiaris	6	10	206	2
High	J9JHN1	RAB11B, member RAS oncogene family OS=Canis lupus familiaris OX=9615 GN=RAB11B PE=4 SV=1	C_familiaris	11	11	178	2
High	A0A5F4CYB6	Uncharacterized protein OS=Canis lupus familiaris OX=9615 GN=PKM PE=4 SV=1	C_familiaris	19	20	167	2
High	E2RNL3	Peroxiredoxin 4 OS=Canis lupus familiaris OX=9615 GN=PRDX4 PE=4 SV=2	C_familiaris	8	13	157	2
High	A0A5F4CH63	Uncharacterized protein OS=Canis lupus familiaris OX=9615 PE=4 SV=1	C_familiaris	2	6	140	2
High	E2RRC6	Radixin OS=Canis lupus familiaris OX=9615 GN=RDX PE=4 SV=2	C_familiaris	11	12	132	2
High	A0A5F4CUQ1	Tropomyosin 1 OS=Canis lupus familiaris OX=9615 GN=TPM1 PE=4 SV=1	C_familiaris	11	11	119	2
High	F1PE31	IGc1 domain-containing protein OS=Canis lupus familiaris OX=9615 GN=DLA88 PE=3 SV=3	C_familiaris	7	8	111	2
High	L7N0E8	Ig-like domain-containing protein OS=Canis lupus familiaris OX=9615 PE=4 SV=2	C_familiaris	6	8	111	2
High	F1P6Q0	G protein subunit alpha i3 OS=Canis lupus familiaris OX=9615 GN=GNAI3 PE=4 SV=2	C_familiaris	8	8	89	2
High	J9NYJ8	RAB6A, member RAS oncogene family OS=Canis lupus familiaris OX=9615 GN=RAB6A PE=4 SV=1	C_familiaris	4	4	86	2
High	F1PKN5	Ig-like domain-containing protein OS=Canis lupus familiaris OX=9615 PE=4 SV=3	C_familiaris	2	5	82	2
High	J9PAQ4	Ras-related protein Rab-4B OS=Canis lupus familiaris OX=9615 GN=RAB4B PE=4 SV=1	C_familiaris	3	3	77	2
High	P18066	Ras-related protein Rab-5A OS=Canis lupus familiaris OX=9615 GN=RAB5A PE=1 SV=1	C_familiaris	5	6	76	2
High	A0A5F4C451	Uncharacterized protein OS=Canis lupus familiaris OX=9615 PE=4 SV=1	C_familiaris	3	8	71	2
High	A0A5F4DFV6	Fc receptor like 4 OS=Canis lupus familiaris OX=9615 GN=FCRL4 PE=4 SV=1	C_familiaris	2	4	59	2
High	F1PCH3	Enolase 1 OS=Canis lupus familiaris OX=9615 GN=ENO1 PE=3 SV=3	C_familiaris	7	9	55	2
High	E2RJH1	Rac family small GTPase 2 OS=Canis lupus familiaris OX=9615 GN=RAC2 PE=4 SV=2	C_familiaris	5	5	52	2
High	A0A5F4BSL9	Uncharacterized protein OS=Canis lupus familiaris OX=9615 PE=4 SV=1	C_familiaris	3	3	47	2
High	A0A5F4CKF4	Tetraspanin 2 OS=Canis lupus familiaris OX=9615 GN=TSPAN2 PE=4 SV=1	C_familiaris	2	2	46	2
High	P02727	Glycophorin-A OS=Canis lupus familiaris OX=9615 GN=GYPA PE=1 SV=3	C_familiaris	2	2	45	2
High	E2R629	Atypical chemokine receptor 1 OS=Canis lupus familiaris OX=9615 GN=ACKR1 PE=4 SV=1	C_familiaris	2	2	37	2
High	J9P2T7	Uncharacterized protein OS=Canis lupus familiaris OX=9615 PE=4 SV=1	C_familiaris	10	10	36	2
High	E2RGB0	Apolipoprotein C4 OS=Canis lupus familiaris OX=9615 GN=APOC4 PE=4 SV=3	C_familiaris	2	2	36	2
High	J9NYC0	Microfibril associated protein 4 OS=Canis lupus familiaris OX=9615 GN=MFAP4 PE=4 SV=2	C_familiaris	2	3	34	2
High	F1PB66	Tetraspanin OS=Canis lupus familiaris OX=9615 GN=CD81 PE=3 SV=2	C_familiaris	2	5	33	2
High	A0A5F4C7L7	Tetraspanin 9 OS=Canis lupus familiaris OX=9615 GN=TSPAN9 PE=4 SV=1	C_familiaris	2	7	32	2
High	F1PQM7	Tetraspanin OS=Canis lupus familiaris OX=9615 GN=CD9 PE=3 SV=3	C_familiaris	2	2	32	2
High	A0A5F4C8U9	Uncharacterized protein OS=Canis lupus familiaris OX=9615 PE=4 SV=1	C_familiaris	4	5	30	2
High	J9P3F4	Stum, mechanosensory transduction mediator homolog OS=Canis lupus familiaris OX=9615 GN=STUM PE=4 SV=2	C_familiaris	2	2	30	2
High	A0A5F4BQS4	Drebrin like OS=Canis lupus familiaris OX=9615 GN=DBNL PE=4 SV=1	C_familiaris	3	3	24	2
High	L7N0E7	Ig-like domain-containing protein OS=Canis lupus familiaris OX=9615 PE=4 SV=2	C_familiaris	2	2	22	2
High	A0A5F4BVL4	Uncharacterized protein OS=Canis lupus familiaris OX=9615 GN=VPS4A PE=4 SV=1	C_familiaris	5	5	20	2
High	P01785	Ig heavy chain V region MOO OS=Canis lupus familiaris OX=9615 PE=1 SV=1	C_familiaris	2	3	19	2
High	A0A5F4CCD0	Cysteine rich secretory protein 2 OS=Canis lupus familiaris OX=9615 GN=CRISP2 PE=4 SV=1	C_familiaris	2	2	18	2
High	A0A5F4DA40	Uncharacterized protein OS=Canis lupus familiaris OX=9615 GN=EIF5A PE=4 SV=1	C_familiaris	2	2	17	2
High	A0A5F4CWQ9	Uncharacterized protein OS=Canis lupus familiaris OX=9615 PE=4 SV=1	C_familiaris	2	2	17	2
High	A0A5F4DFG9	Phosphoribosyl pyrophosphate synthetase 1 OS=Canis lupus familiaris OX=9615 GN=PRPS1 PE=4 SV=1	C_familiaris	4	4	15	2
High	A0A5F4CY61	Uncharacterized protein OS=Canis lupus familiaris OX=9615 PE=4 SV=1	C_familiaris	2	2	14	2
High	E2R020	Ras homolog family member G OS=Canis lupus familiaris OX=9615 GN=RHOG PE=4 SV=3	C_familiaris	3	3	14	2
High	E2RQ34	Megakaryocyte and platelet inhibitory receptor G6b OS=Canis lupus familiaris OX=9615 GN=MPIG6B PE=4 SV=2	C_familiaris	2	2	14	2
High	A0A5F4CGR8	Polycomb group ring finger 3 OS=Canis lupus familiaris OX=9615 GN=PCGF3 PE=4 SV=1	C_familiaris	2	3	14	2
High	F1PS24	Collagen type II alpha 1 chain OS=Canis lupus familiaris OX=9615 GN=COL2A1 PE=4 SV=2	C_familiaris	2	2	13	2
High	A0A5F4DCI7	Uncharacterized protein OS=Canis lupus familiaris OX=9615 PE=4 SV=1	C_familiaris	2	2	12	2
High	F1Q2X9	Solute carrier family 11 member 2 OS=Canis lupus familiaris OX=9615 GN=SLC11A2 PE=3 SV=3	C_familiaris	2	5	12	2
High	E2QXD6	Glyoxalase domain containing 4 OS=Canis lupus familiaris OX=9615 GN=GLOD4 PE=4 SV=3	C_familiaris	2	2	12	2
High	F6V440	Serglycin (Fragment) OS=Canis lupus familiaris OX=9615 GN=SRGN PE=4 SV=2	C_familiaris	2	2	11	2
High	A0A5F4CYD3	Coenzyme Q10B OS=Canis lupus familiaris OX=9615 GN=COQ10B PE=4 SV=1	C_familiaris	2	2	11	2
High	E2RGI4	Chloride intracellular channel protein OS=Canis lupus familiaris OX=9615 GN=CLIC4 PE=3 SV=1	C_familiaris	2	2	11	2
High	E2RSX8	Latexin OS=Canis lupus familiaris OX=9615 GN=LXN PE=4 SV=1	C_familiaris	2	2	11	2
High	A0A5F4CE41	Uncharacterized protein OS=Canis lupus familiaris OX=9615 PE=4 SV=1	C_familiaris	2	2	11	2
High	A0A5F4CCT6	Phosphoribosyl pyrophosphate synthetase 2 OS=Canis lupus familiaris OX=9615 GN=PRPS2 PE=4 SV=1	C_familiaris	4	4	10	2
High	J9P121	MINDY lysine 48 deubiquitinase 1 OS=Canis lupus familiaris OX=9615 GN=MINDY1 PE=4 SV=2	C_familiaris	2	5	10	2
High	F6XEV4	Uncharacterized protein OS=Canis lupus familiaris OX=9615 PE=4 SV=2	C_familiaris	2	2	10	2
High	J9NST4	SelP_N domain-containing protein OS=Canis lupus familiaris OX=9615 GN=SELENOP PE=4 SV=2	C_familiaris	2	2	10	2
High	A0A5F4CFZ9	Cathelicidin antimicrobial peptide OS=Canis lupus familiaris OX=9615 GN=CAMP PE=4 SV=1	C_familiaris	2	2	10	2
High	E2RBW1	GMP reductase OS=Canis lupus familiaris OX=9615 GN=GMPR2 PE=3 SV=1	C_familiaris	4	4	9	2
High	E2R9D5	Uncharacterized protein OS=Canis lupus familiaris OX=9615 PE=4 SV=2	C_familiaris	2	3	9	2
High	A0A5F4CQ32	Integrin subunit alpha M OS=Canis lupus familiaris OX=9615 GN=ITGAM PE=4 SV=1	C_familiaris	3	3	9	2
High	E2R6K5	Histone H3 OS=Canis lupus familiaris OX=9615 GN=GALK1 PE=3 SV=1	C_familiaris	2	2	9	2
High	E2RQ37	Lymphocyte antigen 6 family member G6C OS=Canis lupus familiaris OX=9615 GN=LY6G6C PE=4 SV=1	C_familiaris	2	2	9	2
High	J9P8S3	Protein S100 OS=Canis lupus familiaris OX=9615 GN=S100A8 PE=3 SV=2	C_familiaris	2	2	8	2
High	E2RFJ3	Solute carrier family 40 protein OS=Canis lupus familiaris OX=9615 GN=SLC40A1 PE=3 SV=2	C_familiaris	2	3	8	2
High	J9NZQ3	V-type proton ATPase subunit G OS=Canis lupus familiaris OX=9615 PE=3 SV=2	C_familiaris	2	2	8	2
High	F1PG69	Collagen type III alpha 1 chain OS=Canis lupus familiaris OX=9615 GN=COL3A1 PE=4 SV=3	C_familiaris	3	3	8	2
High	J9P922	Cytochrome b reductase 1 OS=Canis lupus familiaris OX=9615 GN=CYBRD1 PE=4 SV=2	C_familiaris	2	2	8	2
High	F1Q0S2	Sodium/potassium-transporting ATPase subunit beta OS=Canis lupus familiaris OX=9615 GN=ATP1B3 PE=3 SV=3	C_familiaris	2	2	8	2
High	F1PD06	NAD(P)(+)--arginine ADP-ribosyltransferase OS=Canis lupus familiaris OX=9615 GN=ART4 PE=3 SV=2	C_familiaris	2	2	8	2
High	F1PCR0	Microsomal glutathione S-transferase 3 OS=Canis lupus familiaris OX=9615 GN=MGST3 PE=4 SV=2	C_familiaris	2	2	8	2
High	E2R7P9	P2X purinoceptor OS=Canis lupus familiaris OX=9615 GN=P2RX1 PE=3 SV=1	C_familiaris	2	2	8	2
High	H9GW57	Uncharacterized protein OS=Canis lupus familiaris OX=9615 GN=LOC475497 PE=3 SV=3	C_familiaris	2	2	8	2
High	A0A5F4CEG3	Insulin like growth factor binding protein 6 OS=Canis lupus familiaris OX=9615 GN=IGFBP6 PE=4 SV=1	C_familiaris	2	2	7	2
High	E2RKW8	Desmoglein-1 OS=Canis lupus familiaris OX=9615 GN=DSG1 PE=4 SV=3	C_familiaris	2	2	7	2
High	J9NRK8	Fructosamine 3 kinase OS=Canis lupus familiaris OX=9615 GN=FN3K PE=4 SV=2	C_familiaris	2	2	7	2
High	A0A5F4DD49	Serine incorporator 3 OS=Canis lupus familiaris OX=9615 GN=SERINC3 PE=4 SV=1	C_familiaris	2	2	7	2
High	E2RFK4	CD177 molecule OS=Canis lupus familiaris OX=9615 GN=CD177 PE=4 SV=2	C_familiaris	2	2	7	2
High	P12278	Apolipoprotein C-II OS=Canis lupus familiaris OX=9615 GN=APOC2 PE=1 SV=1	C_familiaris	2	3	6	2
High	F1Q0H0	N(alpha)-acetyltransferase 10, NatA catalytic subunit OS=Canis lupus familiaris OX=9615 GN=NAA10 PE=4 SV=2	C_familiaris	2	2	6	2
High	F1PKU7	Protein kinase C OS=Canis lupus familiaris OX=9615 GN=PRKCB PE=3 SV=3	C_familiaris	3	3	6	2
High	E2QXY0	Phosphoprotein membrane anchor with glycosphingolipid microdomains 1 OS=Canis lupus familiaris OX=9615 GN=PAG1 PE=4 SV=1	C_familiaris	2	2	6	2
High	J9P6K8	tRNA(His) guanylyltransferase OS=Canis lupus familiaris OX=9615 GN=THG1L PE=3 SV=1	C_familiaris	2	2	6	2
High	F1Q089	Xg glycoprotein OS=Canis lupus familiaris OX=9615 GN=XG PE=4 SV=3	C_familiaris	2	2	6	2
High	E2RHL4	ADP ribosylation factor 6 OS=Canis lupus familiaris OX=9615 GN=ARF6 PE=3 SV=2	C_familiaris	2	2	6	2
High	F1PHK9	Laminin subunit gamma 1 OS=Canis lupus familiaris OX=9615 GN=LAMC1 PE=4 SV=2	C_familiaris	2	2	5	2
High	F1P9A3	Ferrochelatase OS=Canis lupus familiaris OX=9615 GN=FECH PE=3 SV=2	C_familiaris	2	2	5	2
High	A0A5F4CCI6	Serine/threonine kinase 24 OS=Canis lupus familiaris OX=9615 GN=STK24 PE=4 SV=1	C_familiaris	2	2	5	2
High	A0A5F4CB33	ANTXR cell adhesion molecule 2 OS=Canis lupus familiaris OX=9615 GN=ANTXR2 PE=4 SV=1	C_familiaris	2	2	5	2
High	F1PAY4	TNF alpha induced protein 8 OS=Canis lupus familiaris OX=9615 GN=TNFAIP8 PE=4 SV=2	C_familiaris	2	2	5	2
High	A0A5F4CC39	Elastin microfibril interfacer 1 OS=Canis lupus familiaris OX=9615 GN=EMILIN1 PE=4 SV=1	C_familiaris	2	2	5	2
High	F1PQ52	Myeloperoxidase OS=Canis lupus familiaris OX=9615 GN=MPO PE=4 SV=3	C_familiaris	2	2	5	2
High	A0A5F4CF70	Solute carrier family 38 member 10 OS=Canis lupus familiaris OX=9615 GN=SLC38A10 PE=4 SV=1	C_familiaris	2	2	5	2
High	A0A5F4CI04	Uncharacterized protein OS=Canis lupus familiaris OX=9615 GN=SCAMP3 PE=4 SV=1	C_familiaris	2	2	5	2
High	E2QW61	Lipopolysaccharide binding protein OS=Canis lupus familiaris OX=9615 GN=LBP PE=4 SV=3	C_familiaris	2	2	5	2
High	F1P6A2	Matrix metalloproteinase-9 OS=Canis lupus familiaris OX=9615 GN=MMP9 PE=3 SV=3	C_familiaris	2	2	5	2
High	A0A5F4CWM0	Diaphanous related formin 1 OS=Canis lupus familiaris OX=9615 GN=DIAPH1 PE=4 SV=1	C_familiaris	2	2	5	2
High	J9PAW2	Importin subunit alpha OS=Canis lupus familiaris OX=9615 GN=KPNA4 PE=3 SV=1	C_familiaris	3	3	5	2
High	E2RNX6	Notchless homolog 1 OS=Canis lupus familiaris OX=9615 GN=NLE1 PE=4 SV=3	C_familiaris	2	2	5	2
High	E2RAM4	Fc fragment of IgE receptor Ig OS=Canis lupus familiaris OX=9615 GN=FCER1G PE=4 SV=1	C_familiaris	2	2	5	2
High	F1PS47	RAN binding protein 3 OS=Canis lupus familiaris OX=9615 GN=RANBP3 PE=4 SV=3	C_familiaris	2	2	5	2
High	A0A5F4D5P6	Erbb2 interacting protein OS=Canis lupus familiaris OX=9615 GN=ERBIN PE=4 SV=1	C_familiaris	2	2	5	2
High	J9P7C6	Podocalyxin OS=Canis lupus familiaris OX=9615 GN=PODXL PE=3 SV=2	C_familiaris	2	2	5	2
High	E2RK13	Protein XRP2 OS=Canis lupus familiaris OX=9615 GN=RP2 PE=3 SV=1	C_familiaris	2	2	5	2
High	F1PBG0	Protein kinase AMP-activated non-catalytic subunit gamma 1 OS=Canis lupus familiaris OX=9615 GN=PRKAG1 PE=4 SV=2	C_familiaris	2	2	5	2
High	A0A5F4BQ87	WW domain binding protein 2 OS=Canis lupus familiaris OX=9615 GN=WBP2 PE=4 SV=1	C_familiaris	2	2	5	2
High	F1Q3C4	Uncharacterized protein OS=Canis lupus familiaris OX=9615 GN=LOC479912 PE=3 SV=3	C_familiaris	2	2	4	2
High	J9P7R7	Shootin 1 OS=Canis lupus familiaris OX=9615 GN=SHTN1 PE=4 SV=1	C_familiaris	2	2	4	2
High	F1PVR0	Matrix metallopeptidase 8 OS=Canis lupus familiaris OX=9615 GN=MMP8 PE=3 SV=2	C_familiaris	2	2	4	2
High	J9NXC6	Eukaryotic translation elongation factor 1 beta 2 OS=Canis lupus familiaris OX=9615 GN=EEF1B2 PE=4 SV=2	C_familiaris	2	2	4	2
High	A0A0B4J195	Aspartate aminotransferase OS=Canis lupus familiaris OX=9615 GN=GOT1 PE=4 SV=1	C_familiaris	2	2	4	2
High	E2RKJ6	Serpin family B member 1 OS=Canis lupus familiaris OX=9615 GN=SERPINB1 PE=3 SV=1	C_familiaris	2	2	4	2
High	A0A5F4D4V2	Sidekick cell adhesion molecule 1 OS=Canis lupus familiaris OX=9615 GN=SDK1 PE=4 SV=1	C_familiaris	2	2	4	2
High	A0A5F4CKV5	Solute carrier family 12 member 7 OS=Canis lupus familiaris OX=9615 GN=SLC12A7 PE=4 SV=1	C_familiaris	2	2	4	2
High	A0A5F4BZF0	Ubiquinol-cytochrome c reductase core protein 2 OS=Canis lupus familiaris OX=9615 GN=UQCRC2 PE=4 SV=1	C_familiaris	2	2	4	2
High	F1PAZ6	Enoyl-CoA hydratase, short chain 1 OS=Canis lupus familiaris OX=9615 GN=ECHS1 PE=3 SV=3	C_familiaris	2	2	4	2
High	A0A5F4D7F7	ABRA C-terminal like OS=Canis lupus familiaris OX=9615 GN=ABRACL PE=4 SV=1	C_familiaris	2	2	4	2
High	F1P9Q2	SH3 domain containing kinase binding protein 1 OS=Canis lupus familiaris OX=9615 GN=SH3KBP1 PE=4 SV=2	C_familiaris	2	2	4	2
High	F1Q136	Vesicle associated membrane protein 5 OS=Canis lupus familiaris OX=9615 GN=VAMP5 PE=4 SV=3	C_familiaris	2	2	4	2
High	E2RQC9	RuvB-like helicase OS=Canis lupus familiaris OX=9615 GN=RUVBL1 PE=3 SV=2	C_familiaris	2	2	4	2
High	F1PUY6	Meprin A subunit OS=Canis lupus familiaris OX=9615 GN=MEP1A PE=4 SV=2	C_familiaris	2	2	4	2
High	Q8MKI5	Caspase-3 OS=Canis lupus familiaris OX=9615 GN=CASP3 PE=2 SV=1	C_familiaris	2	2	4	2
High	F1PWR1	Insulin like growth factor 2 receptor OS=Canis lupus familiaris OX=9615 GN=IGF2R PE=4 SV=3	C_familiaris	2	2	4	2
High	A0A5F4D491	Dihydrolipoamide S-succinyltransferase OS=Canis lupus familiaris OX=9615 GN=DLST PE=4 SV=1	C_familiaris	2	2	4	2
High	F1PFB7	WAS/WASL interacting protein family member 1 OS=Canis lupus familiaris OX=9615 GN=WIPF1 PE=4 SV=3	C_familiaris	2	2	4	2
High	A0A5F4BT67	Alpha-centractin OS=Canis lupus familiaris OX=9615 GN=ACTR1A PE=4 SV=1	C_familiaris	2	2	4	2
High	F1Q1H3	Programmed cell death 6 OS=Canis lupus familiaris OX=9615 GN=PDCD6 PE=4 SV=3	C_familiaris	2	2	3	2
High	Q2A652	G-protein coupled receptor OS=Canis lupus familiaris OX=9615 GN=PTGDR2 PE=2 SV=1	C_familiaris	2	2	3	2
High	F1P795	RAS guanyl releasing protein 2 OS=Canis lupus familiaris OX=9615 GN=RASGRP2 PE=4 SV=2	C_familiaris	2	3	3	2
High	F6Y5Z5	EF-hand calcium binding domain 8 OS=Canis lupus familiaris OX=9615 GN=EFCAB8 PE=4 SV=2	C_familiaris	2	3	3	2
High	F1PIV8	EF-hand domain family member D2 OS=Canis lupus familiaris OX=9615 GN=EFHD2 PE=4 SV=3	C_familiaris	2	2	3	2
High	Q4LAL9	Cathepsin D OS=Canis lupus familiaris OX=9615 GN=CTSD PE=2 SV=1	C_familiaris	2	2	3	2
High	J9P820	Formin homology 2 domain containing 1 OS=Canis lupus familiaris OX=9615 GN=FHOD1 PE=4 SV=1	C_familiaris	2	2	3	2
High	J9P4C5	BCL2 associated athanogene 2 OS=Canis lupus familiaris OX=9615 GN=BAG2 PE=4 SV=1	C_familiaris	2	2	3	2
High	A0A5F4CWY2	Quinoid dihydropteridine reductase OS=Canis lupus familiaris OX=9615 GN=QDPR PE=4 SV=1	C_familiaris	2	3	3	2
High	E2QTA2	Papilin, proteoglycan like sulfated glycoprotein OS=Canis lupus familiaris OX=9615 GN=PAPLN PE=4 SV=2	C_familiaris	2	2	3	2
High	J9P6Y7	Solute carrier family 30 member 1 OS=Canis lupus familiaris OX=9615 GN=SLC30A1 PE=4 SV=1	C_familiaris	2	2	3	2
High	A0A5F4C5J5	Glycoprotein VI platelet OS=Canis lupus familiaris OX=9615 GN=GP6 PE=4 SV=1	C_familiaris	2	2	3	2
High	J9NTA1	Methyltransferase like 7A OS=Canis lupus familiaris OX=9615 GN=METTL7A PE=4 SV=2	C_familiaris	2	2	3	2
High	E2R5Z5	Transmembrane 9 superfamily member OS=Canis lupus familiaris OX=9615 GN=TM9SF2 PE=3 SV=2	C_familiaris	2	2	3	2
High	J9P1D1	Glia maturation factor OS=Canis lupus familiaris OX=9615 GN=GMFG PE=3 SV=2	C_familiaris	2	2	3	2
High	A0A5F4C357	Phospholipid scramblase 4 OS=Canis lupus familiaris OX=9615 GN=PLSCR4 PE=4 SV=1	C_familiaris	2	2	3	2
High	F1PQ92	STE20 related adaptor beta OS=Canis lupus familiaris OX=9615 GN=STRADB PE=4 SV=2	C_familiaris	2	2	3	2
High	F1Q0B6	Src kinase associated phosphoprotein 2 OS=Canis lupus familiaris OX=9615 GN=SKAP2 PE=4 SV=2	C_familiaris	2	2	3	2
High	F1PGJ5	Scavenger receptor class B member 2 OS=Canis lupus familiaris OX=9615 GN=SCARB2 PE=3 SV=2	C_familiaris	2	2	3	2
High	F1PB96	ICAM_N domain-containing protein OS=Canis lupus familiaris OX=9615 GN=ICAM4 PE=4 SV=3	C_familiaris	2	2	3	2
High	E2R0R1	Proteasome 26S subunit, non-ATPase 9 OS=Canis lupus familiaris OX=9615 GN=PSMD9 PE=4 SV=2	C_familiaris	2	2	3	2
High	A0A5F4DJ40	Prohibitin 2 OS=Canis lupus familiaris OX=9615 GN=PHB2 PE=4 SV=1	C_familiaris	2	2	3	2
High	E2RNY7	ATP synthase F1 subunit gamma OS=Canis lupus familiaris OX=9615 GN=ATP5F1C PE=2 SV=3	C_familiaris	2	2	3	2
High	F1PMH6	Mannose receptor C-type 1 OS=Canis lupus familiaris OX=9615 GN=MRC1 PE=4 SV=3	C_familiaris	2	2	3	2
High	F1PM26	CD109 molecule OS=Canis lupus familiaris OX=9615 GN=CD109 PE=4 SV=3	C_familiaris	2	2	3	2
High	A0A5F4CUP0	Poly(A) binding protein cytoplasmic 1 OS=Canis lupus familiaris OX=9615 GN=PABPC1 PE=4 SV=1	C_familiaris	2	2	3	2
High	A0A5F4C3I4	ABI family member 3 binding protein OS=Canis lupus familiaris OX=9615 GN=ABI3BP PE=4 SV=1	C_familiaris	2	2	3	2
High	A0A5F4D8P8	Isocitrate dehydrogenase (NADP(+)) 2, mitochondrial OS=Canis lupus familiaris OX=9615 GN=IDH2 PE=4 SV=1	C_familiaris	2	2	3	2
High	A0A5F4D858	Protein kinase cAMP-activated catalytic subunit beta OS=Canis lupus familiaris OX=9615 GN=PRKACB PE=4 SV=1	C_familiaris	2	2	3	2
High	A0A5F4D269	Synaptotagmin like 4 OS=Canis lupus familiaris OX=9615 GN=SYTL4 PE=4 SV=1	C_familiaris	2	2	3	2
High	E2R3J3	G protein subunit alpha z OS=Canis lupus familiaris OX=9615 GN=GNAZ PE=4 SV=1	C_familiaris	2	2	3	2
High	F1PE67	AP-2 complex subunit alpha OS=Canis lupus familiaris OX=9615 GN=AP2A1 PE=3 SV=3	C_familiaris	2	2	3	2
High	A0A5F4C7B8	Two pore segment channel 2 OS=Canis lupus familiaris OX=9615 GN=TPCN2 PE=4 SV=1	C_familiaris	2	2	3	2
High	F6Y591	UBX domain protein 6 OS=Canis lupus familiaris OX=9615 GN=UBXN6 PE=4 SV=2	C_familiaris	2	2	3	2
High	E2RQS7	Peptidylprolyl isomerase OS=Canis lupus familiaris OX=9615 GN=FKBP3 PE=4 SV=1	C_familiaris	2	2	3	2
High	E2RNT3	DExH-box helicase 9 OS=Canis lupus familiaris OX=9615 GN=DHX9 PE=4 SV=1	C_familiaris	2	2	3	2
High	P30804	Adenylate cyclase type 6 OS=Canis lupus familiaris OX=9615 GN=ADCY6 PE=1 SV=1	C_familiaris	2	2	3	2
High	A0A5F4CGF8	Abl interactor 2 OS=Canis lupus familiaris OX=9615 GN=ABI2 PE=4 SV=1	C_familiaris	2	2	2	2
High	Q5W412	Proteasome subunit beta OS=Canis lupus familiaris OX=9615 GN=PSMB9 PE=3 SV=1	C_familiaris	2	2	2	2
High	Q6UR05	Multidrug resistance-associated protein 1 OS=Canis lupus familiaris OX=9615 GN=ABCC1 PE=1 SV=1	C_familiaris	2	2	2	2
High	A0A5F4CV51	RAB23, member RAS oncogene family OS=Canis lupus familiaris OX=9615 GN=RAB23 PE=4 SV=1	C_familiaris	2	2	2	2
High	A0A5F4CXH2	Bactericidal permeability increasing protein OS=Canis lupus familiaris OX=9615 GN=BPI PE=4 SV=1	C_familiaris	2	2	2	2
High	A0A5F4CIT2	Plexin domain containing 2 OS=Canis lupus familiaris OX=9615 GN=PLXDC2 PE=4 SV=1	C_familiaris	2	2	2	2
High	A0A5F4CD04	Abl interactor 1 OS=Canis lupus familiaris OX=9615 GN=ABI1 PE=4 SV=1	C_familiaris	2	2	2	2
High	A0A5F4BRN0	Hepatocyte growth factor-regulated tyrosine kinase substrate OS=Canis lupus familiaris OX=9615 GN=HGS PE=4 SV=1	C_familiaris	2	2	2	2
High	E2RL17	Eukaryotic translation initiation factor 2 subunit alpha OS=Canis lupus familiaris OX=9615 GN=EIF2S1 PE=4 SV=1	C_familiaris	2	2	2	2
High	A0A5F4DGX0	Uncharacterized protein OS=Canis lupus familiaris OX=9615 PE=4 SV=1	C_familiaris	2	2	2	2
High	P42929	Heat shock protein beta-1 OS=Canis lupus familiaris OX=9615 GN=HSPB1 PE=2 SV=1	C_familiaris	2	2	2	2
High	E2RR68	Niban apoptosis regulator 2 OS=Canis lupus familiaris OX=9615 GN=NIBAN2 PE=4 SV=1	C_familiaris	2	2	2	2
High	F6XIK8	Synaptotagmin binding cytoplasmic RNA interacting protein OS=Canis lupus familiaris OX=9615 GN=SYNCRIP PE=4 SV=1	C_familiaris	2	2	2	2
High	F1PPB6	Serine/threonine kinase receptor associated protein OS=Canis lupus familiaris OX=9615 GN=STRAP PE=4 SV=3	C_familiaris	2	2	2	2
High	E2QWG2	F2R like thrombin or trypsin receptor 3 OS=Canis lupus familiaris OX=9615 GN=F2RL3 PE=3 SV=2	C_familiaris	2	2	2	2
High	E2RB45	PI3K/PI4K domain-containing protein OS=Canis lupus familiaris OX=9615 GN=PGAM1 PE=4 SV=3	C_familiaris	2	2	2	2
High	E2R3P7	Ring finger protein 123 OS=Canis lupus familiaris OX=9615 GN=RNF123 PE=4 SV=2	C_familiaris	2	2	2	2
High	A0A5F4DHC3	CD37 molecule OS=Canis lupus familiaris OX=9615 GN=CD37 PE=4 SV=1	C_familiaris	2	2	2	2
High	A0A5F4CDM2	Damage specific DNA binding protein 1 OS=Canis lupus familiaris OX=9615 GN=DDB1 PE=4 SV=1	C_familiaris	2	2	2	2
High	E2RN45	G3BP stress granule assembly factor 1 OS=Canis lupus familiaris OX=9615 GN=G3BP1 PE=4 SV=2	C_familiaris	2	2	2	2
High	A0A5F4DD71	Adhesion regulating molecule 1 OS=Canis lupus familiaris OX=9615 GN=ADRM1 PE=4 SV=1	C_familiaris	2	2	2	2
High	A0A5F4D4K2	Late endosomal/lysosomal adaptor, MAPK and MTOR activator 1 OS=Canis lupus familiaris OX=9615 GN=LAMTOR1 PE=4 SV=1	C_familiaris	2	2	2	2
High	E2RPP4	CDC42 binding protein kinase beta OS=Canis lupus familiaris OX=9615 GN=CDC42BPB PE=3 SV=3	C_familiaris	2	2	2	2
High	E2R1R4	Uncharacterized protein OS=Canis lupus familiaris OX=9615 GN=ATP6V1E1 PE=3 SV=1	C_familiaris	2	2	2	2
High	A0A5F4CK47	Presenilin 2 OS=Canis lupus familiaris OX=9615 GN=PSEN2 PE=4 SV=1	C_familiaris	2	2	2	2
High	E2RRD4	Thioredoxin domain-containing protein OS=Canis lupus familiaris OX=9615 GN=PRDX3 PE=4 SV=2	C_familiaris	2	2	2	2
High	F1PVC0	Glycogenin 1 OS=Canis lupus familiaris OX=9615 GN=GYG1 PE=4 SV=3	C_familiaris	2	2	2	2
High	J9NSQ4	Regulator of G protein signaling 10 OS=Canis lupus familiaris OX=9615 GN=RGS10 PE=4 SV=2	C_familiaris	2	2	2	2
High	E2RFY1	Transmembrane channel-like protein OS=Canis lupus familiaris OX=9615 GN=TMC8 PE=3 SV=2	C_familiaris	2	2	2	2
High	A0A5F4C6H3	Uncharacterized protein OS=Canis lupus familiaris OX=9615 GN=LOC477699 PE=4 SV=1	C_familiaris	84	164	8827	1
High	E2RCC8	Uncharacterized protein OS=Canis lupus familiaris OX=9615 PE=4 SV=3	C_familiaris	29	64	5826	1
High	A0A5F4CIZ1	Uncharacterized protein OS=Canis lupus familiaris OX=9615 PE=4 SV=1	C_familiaris	27	60	5676	1
High	A0A5F4D838	Ankyrin 1 OS=Canis lupus familiaris OX=9615 GN=ANK1 PE=4 SV=1	C_familiaris	100	206	3757	1
High	F1PRD8	Ankyrin 1 OS=Canis lupus familiaris OX=9615 GN=ANK1 PE=4 SV=3	C_familiaris	100	206	3745	1
High	A0A5F4C8F3	Ankyrin 1 OS=Canis lupus familiaris OX=9615 GN=ANK1 PE=4 SV=1	C_familiaris	98	200	3642	1
High	A0A5F4DAK7	Uncharacterized protein OS=Canis lupus familiaris OX=9615 GN=LOC609402 PE=4 SV=1	C_familiaris	14	23	3318	1
High	F1PWR2	Uncharacterized protein OS=Canis lupus familiaris OX=9615 PE=4 SV=3	C_familiaris	76	129	3303	1
High	L7N0F1	Ig-like domain-containing protein OS=Canis lupus familiaris OX=9615 GN=LOC100687054 PE=4 SV=1	C_familiaris	7	7	2488	1
High	O18840	Actin, cytoplasmic 1 OS=Canis lupus familiaris OX=9615 GN=ACTB PE=2 SV=3	C_familiaris	25	52	1940	1
High	Z4YHI2	Uncharacterized protein OS=Canis lupus familiaris OX=9615 GN=ACTG1 PE=3 SV=2	C_familiaris	25	52	1904	1
High	J9NXL3	GLOBIN domain-containing protein OS=Canis lupus familiaris OX=9615 GN=LOC100855540 PE=3 SV=2	C_familiaris	10	11	1766	1
High	A0A5F4DDL4	Uncharacterized protein OS=Canis lupus familiaris OX=9615 PE=4 SV=1	C_familiaris	6	18	1475	1
High	A0A5F4D1B8	Uncharacterized protein OS=Canis lupus familiaris OX=9615 PE=4 SV=1	C_familiaris	7	22	1284	1
High	A0A5F4C2N3	Kininogen 1 OS=Canis lupus familiaris OX=9615 GN=KNG1 PE=4 SV=1	C_familiaris	23	35	1198	1
High	A0A5F4BTN9	Uncharacterized protein OS=Canis lupus familiaris OX=9615 PE=4 SV=1	C_familiaris	4	12	1045	1
High	A0A5F4D3E6	Uncharacterized protein OS=Canis lupus familiaris OX=9615 PE=4 SV=1	C_familiaris	6	13	891	1
High	A0A5F4CLB9	Uncharacterized protein OS=Canis lupus familiaris OX=9615 PE=4 SV=1	C_familiaris	4	5	865	1
High	A0A5F4D6M5	Inter-alpha-trypsin inhibitor heavy chain 1 OS=Canis lupus familiaris OX=9615 GN=ITIH1 PE=4 SV=1	C_familiaris	25	56	808	1
High	A0A5F4C335	Uncharacterized protein OS=Canis lupus familiaris OX=9615 PE=4 SV=1	C_familiaris	8	19	758	1
High	A0A5F4C2R6	Uncharacterized protein OS=Canis lupus familiaris OX=9615 PE=4 SV=1	C_familiaris	7	19	733	1
High	A0A5F4DCY9	Uncharacterized protein OS=Canis lupus familiaris OX=9615 PE=4 SV=1	C_familiaris	6	10	560	1
High	H9GWR0	Ig-like domain-containing protein OS=Canis lupus familiaris OX=9615 PE=4 SV=3	C_familiaris	6	9	558	1
High	J9P1M7	Ig-like domain-containing protein OS=Canis lupus familiaris OX=9615 PE=4 SV=2	C_familiaris	5	11	510	1
High	A0A5F4C493	Uncharacterized protein OS=Canis lupus familiaris OX=9615 PE=4 SV=1	C_familiaris	4	10	470	1
High	J9P7A6	Uncharacterized protein OS=Canis lupus familiaris OX=9615 GN=ALDOA PE=4 SV=2	C_familiaris	19	28	461	1
High	A0A5F4D071	Uncharacterized protein OS=Canis lupus familiaris OX=9615 PE=4 SV=1	C_familiaris	2	4	416	1
High	E2RJW9	Adducin 1 OS=Canis lupus familiaris OX=9615 GN=ADD1 PE=4 SV=3	C_familiaris	25	31	412	1
High	A0A5F4DCG3	Uncharacterized protein OS=Canis lupus familiaris OX=9615 PE=4 SV=1	C_familiaris	2	8	278	1
High	A0A5F4BTM1	Uncharacterized protein OS=Canis lupus familiaris OX=9615 PE=4 SV=1	C_familiaris	7	10	267	1
High	P12800	Fibrinogen gamma chain (Fragment) OS=Canis lupus familiaris OX=9615 GN=FGG PE=1 SV=1	C_familiaris	2	4	220	1
High	P50551	Vasodilator-stimulated phosphoprotein OS=Canis lupus familiaris OX=9615 GN=VASP PE=1 SV=3	C_familiaris	14	21	213	1
High	J9P540	Glyceraldehyde-3-phosphate dehydrogenase OS=Canis lupus familiaris OX=9615 GN=LOC477441 PE=3 SV=1	C_familiaris	8	14	211	1
High	A0A5F4DJC7	Uncharacterized protein OS=Canis lupus familiaris OX=9615 PE=4 SV=1	C_familiaris	6	8	209	1
High	A0A5F4D2V3	Ankyrin 3 OS=Canis lupus familiaris OX=9615 GN=ANK3 PE=4 SV=1	C_familiaris	6	8	199	1
High	A0A5F4DJA2	Uncharacterized protein OS=Canis lupus familiaris OX=9615 GN=DLA-64 PE=4 SV=1	C_familiaris	9	11	184	1
High	A0A5F4CP02	Uncharacterized protein OS=Canis lupus familiaris OX=9615 GN=PKM PE=4 SV=1	C_familiaris	18	19	176	1
High	L7N0J0	Ig-like domain-containing protein OS=Canis lupus familiaris OX=9615 PE=4 SV=2	C_familiaris	2	5	173	1
High	J9NTU0	Gp_dh_N domain-containing protein OS=Canis lupus familiaris OX=9615 PE=3 SV=1	C_familiaris	5	10	161	1
High	P62490	Ras-related protein Rab-11A OS=Canis lupus familiaris OX=9615 GN=RAB11A PE=2 SV=3	C_familiaris	10	10	160	1
High	A0A5F4DCD2	Uncharacterized protein OS=Canis lupus familiaris OX=9615 GN=DLA-64 PE=4 SV=1	C_familiaris	8	10	158	1
High	F1PL63	Fructose-bisphosphate aldolase OS=Canis lupus familiaris OX=9615 GN=ALDOC PE=3 SV=1	C_familiaris	3	8	152	1
High	E2RF52	Proteasome subunit alpha type OS=Canis lupus familiaris OX=9615 GN=PSMA8 PE=3 SV=2	C_familiaris	4	5	151	1
High	E2RFV2	Tubulin beta chain OS=Canis lupus familiaris OX=9615 GN=TUBB4A PE=3 SV=2	C_familiaris	16	21	147	1
High	A0A5F4DI88	Peroxiredoxin 4 OS=Canis lupus familiaris OX=9615 GN=PRDX4 PE=4 SV=1	C_familiaris	7	9	137	1
High	A0A5F4D0K4	Bridging integrator 2 OS=Canis lupus familiaris OX=9615 GN=BIN2 PE=4 SV=1	C_familiaris	16	17	134	1
High	A0A5F4BRE0	Tropomyosin 3 OS=Canis lupus familiaris OX=9615 GN=TPM3 PE=4 SV=1	C_familiaris	12	13	129	1
High	J9P3L5	Ig-like domain-containing protein OS=Canis lupus familiaris OX=9615 PE=4 SV=2	C_familiaris	2	6	128	1
High	A0A5F4CV27	Filamin C OS=Canis lupus familiaris OX=9615 GN=FLNC PE=4 SV=1	C_familiaris	11	11	127	1
High	E2REU6	IF rod domain-containing protein OS=Canis lupus familiaris OX=9615 GN=KRT18 PE=3 SV=3	C_familiaris	2	2	127	1
High	J9P0D4	Ig-like domain-containing protein OS=Canis lupus familiaris OX=9615 PE=4 SV=2	C_familiaris	2	2	125	1
High	A0A5F4D172	Uncharacterized protein OS=Canis lupus familiaris OX=9615 PE=4 SV=1	C_familiaris	1	3	122	1
High	A0A5F4C4S7	Uncharacterized protein OS=Canis lupus familiaris OX=9615 PE=4 SV=1	C_familiaris	5	14	121	1
High	E2R150	Keratin 24 OS=Canis lupus familiaris OX=9615 GN=KRT24 PE=3 SV=3	C_familiaris	3	4	121	1
High	A0A5F4D567	Uncharacterized protein OS=Canis lupus familiaris OX=9615 PE=4 SV=1	C_familiaris	8	8	99	1
High	A0A5F4CVC3	G protein subunit beta 4 OS=Canis lupus familiaris OX=9615 GN=GNB4 PE=4 SV=1	C_familiaris	6	8	98	1
Medium	F1Q3Z3	Solute carrier organic anion transporter family member OS=Canis lupus familiaris OX=9615 GN=SLCO6A1 PE=3 SV=2	C_familiaris	1	1	96	1
High	E2RGQ8	Ig-like domain-containing protein OS=Canis lupus familiaris OX=9615 PE=4 SV=3	C_familiaris	5	6	88	1
High	A0A5F4CGR9	Uncharacterized protein OS=Canis lupus familiaris OX=9615 PE=4 SV=1	C_familiaris	1	2	82	1
High	A0A5F4D946	Uncharacterized protein OS=Canis lupus familiaris OX=9615 PE=4 SV=1	C_familiaris	2	3	81	1
High	J9P4B9	RAB6B, member RAS oncogene family OS=Canis lupus familiaris OX=9615 GN=RAB6B PE=4 SV=2	C_familiaris	3	3	78	1
High	A0A5F4CYE6	Uncharacterized protein OS=Canis lupus familiaris OX=9615 GN=LOC100855600 PE=4 SV=1	C_familiaris	2	2	76	1
High	F1PJ01	Myosin heavy chain 11 OS=Canis lupus familiaris OX=9615 GN=MYH11 PE=3 SV=2	C_familiaris	10	13	75	1
High	E2QZT7	14_3_3 domain-containing protein OS=Canis lupus familiaris OX=9615 PE=3 SV=2	C_familiaris	4	6	70	1
High	A0A5F4DLE0	Uncharacterized protein OS=Canis lupus familiaris OX=9615 PE=4 SV=1	C_familiaris	2	4	67	1
High	A0A5F4CE93	Uncharacterized protein OS=Canis lupus familiaris OX=9615 PE=4 SV=1	C_familiaris	1	2	61	1
High	F1PLM3	Tubulin alpha chain OS=Canis lupus familiaris OX=9615 PE=3 SV=2	C_familiaris	3	3	58	1
High	A0A5F4CNN7	Uncharacterized protein OS=Canis lupus familiaris OX=9615 PE=4 SV=1	C_familiaris	1	2	52	1
High	A0A5F4C6L9	Phosphoglycerate kinase 2 OS=Canis lupus familiaris OX=9615 GN=PGK2 PE=4 SV=1	C_familiaris	6	9	50	1
High	A0A5F4CI17	Uncharacterized protein OS=Canis lupus familiaris OX=9615 PE=4 SV=1	C_familiaris	2	6	50	1
High	J9JHP2	Histone H2A OS=Canis lupus familiaris OX=9615 PE=3 SV=2	C_familiaris	5	5	44	1
High	J9P0L5	Histone H2A OS=Canis lupus familiaris OX=9615 GN=HIST2H2AA3 PE=3 SV=1	C_familiaris	5	5	44	1
High	A0A5F4D3Y3	Uncharacterized protein OS=Canis lupus familiaris OX=9615 PE=4 SV=1	C_familiaris	2	3	42	1
High	J9P932	Nucleoside diphosphate kinase OS=Canis lupus familiaris OX=9615 PE=3 SV=2	C_familiaris	5	5	41	1
High	E2R8C5	Ig-like domain-containing protein OS=Canis lupus familiaris OX=9615 PE=4 SV=2	C_familiaris	1	3	41	1
High	F1PI77	Guanylate cyclase 1 soluble subunit alpha 2 OS=Canis lupus familiaris OX=9615 GN=GUCY1A2 PE=3 SV=3	C_familiaris	1	1	38	1
High	Q8WNN6	Superoxide dismutase [Cu-Zn] OS=Canis lupus familiaris OX=9615 GN=SOD1 PE=2 SV=1	C_familiaris	2	2	36	1
Medium	A0A5F4CVC4	Arginase 2 OS=Canis lupus familiaris OX=9615 GN=ARG2 PE=4 SV=1	C_familiaris	1	1	35	1
High	F1PNP7	EH domain containing 2 OS=Canis lupus familiaris OX=9615 GN=EHD2 PE=3 SV=3	C_familiaris	3	3	33	1
High	A0A5F4CLU1	Superoxide dismutase [Cu-Zn] OS=Canis lupus familiaris OX=9615 GN=SOD1 PE=4 SV=1	C_familiaris	2	2	33	1
High	A0A5F4C0G8	Uncharacterized protein OS=Canis lupus familiaris OX=9615 GN=PSMD5 PE=4 SV=1	C_familiaris	9	9	32	1
Medium	A0A5F4CFS5	URI1 prefoldin like chaperone OS=Canis lupus familiaris OX=9615 GN=URI1 PE=4 SV=1	C_familiaris	1	1	32	1
High	A0A5F4CFG8	WD repeat, sterile alpha motif and U-box domain containing 1 OS=Canis lupus familiaris OX=9615 GN=WDSUB1 PE=4 SV=1	C_familiaris	3	6	29	1
High	A0A5F4DGR2	Uncharacterized protein OS=Canis lupus familiaris OX=9615 PE=4 SV=1	C_familiaris	1	5	29	1
High	A0A5F4C3J1	Uncharacterized protein OS=Canis lupus familiaris OX=9615 PE=4 SV=1	C_familiaris	3	4	27	1
High	E2RC89	Glyceraldehyde-3-phosphate dehydrogenase OS=Canis lupus familiaris OX=9615 GN=GAPDHS PE=3 SV=1	C_familiaris	2	3	27	1
Medium	F1PXV0	Uncharacterized protein OS=Canis lupus familiaris OX=9615 GN=LOC606788 PE=4 SV=2	C_familiaris	1	1	25	1
High	A0A5F4CYS8	Uncharacterized protein OS=Canis lupus familiaris OX=9615 PE=4 SV=1	C_familiaris	2	2	24	1
High	E2R3K1	Tr-type G domain-containing protein OS=Canis lupus familiaris OX=9615 GN=LOC102153873 PE=4 SV=1	C_familiaris	3	4	24	1
High	A0A5F4CR39	Uncharacterized protein OS=Canis lupus familiaris OX=9615 PE=4 SV=1	C_familiaris	2	2	24	1
High	J9NWJ5	Thioredoxin OS=Canis lupus familiaris OX=9615 PE=3 SV=2	C_familiaris	2	2	24	1
High	J9P190	Mitogen-activated protein kinase 8 interacting protein 3 OS=Canis lupus familiaris OX=9615 GN=MAPK8IP3 PE=4 SV=2	C_familiaris	1	1	21	1
High	A0A5F4BUM4	Uncharacterized protein OS=Canis lupus familiaris OX=9615 PE=4 SV=1	C_familiaris	1	2	20	1
Medium	A0A5F4D9L6	Zinc finger C4H2-type containing OS=Canis lupus familiaris OX=9615 GN=ZC4H2 PE=4 SV=1	C_familiaris	1	1	20	1
High	F1Q3Y2	Dihydropyrimidinase like 3 OS=Canis lupus familiaris OX=9615 GN=DPYSL3 PE=4 SV=2	C_familiaris	3	3	17	1
High	F1PVE5	Vacuolar protein sorting 4 homolog B OS=Canis lupus familiaris OX=9615 GN=VPS4B PE=3 SV=2	C_familiaris	4	4	17	1
High	F1Q185	Ig-like domain-containing protein OS=Canis lupus familiaris OX=9615 PE=4 SV=3	C_familiaris	1	1	17	1
High	A0A5F4D7X0	Centrosomal protein 164 OS=Canis lupus familiaris OX=9615 GN=CEP164 PE=4 SV=1	C_familiaris	1	1	15	1
Low	A0A5F4DIV0	Regulator of G protein signaling 3 OS=Canis lupus familiaris OX=9615 GN=RGS3 PE=4 SV=1	C_familiaris	1	1	15	1
High	F1PPL6	RAP2C, member of RAS oncogene family OS=Canis lupus familiaris OX=9615 GN=RAP2C PE=4 SV=2	C_familiaris	3	3	14	1
High	L7N0D0	Serine/threonine-protein phosphatase OS=Canis lupus familiaris OX=9615 GN=PPP1CA PE=3 SV=1	C_familiaris	5	5	14	1
High	H9GW54	Drebrin like OS=Canis lupus familiaris OX=9615 GN=DBNL PE=4 SV=3	C_familiaris	2	2	14	1
High	J9NT43	STI1 domain-containing protein OS=Canis lupus familiaris OX=9615 PE=4 SV=2	C_familiaris	3	3	14	1
High	A0A5F4D8R7	ATP binding cassette subfamily A member 12 OS=Canis lupus familiaris OX=9615 GN=ABCA12 PE=4 SV=1	C_familiaris	1	2	14	1
Medium	A0A5F4CFF9	Fms related tyrosine kinase 4 OS=Canis lupus familiaris OX=9615 GN=FLT4 PE=4 SV=1	C_familiaris	1	1	14	1
High	A0A5F4BSZ6	Chaperonin containing TCP1 subunit 6B OS=Canis lupus familiaris OX=9615 GN=CCT6B PE=4 SV=1	C_familiaris	6	6	13	1
High	Q8MJ46	Serine/threonine-protein phosphatase PP1-gamma catalytic subunit OS=Canis lupus familiaris OX=9615 GN=PPP1CC PE=2 SV=1	C_familiaris	5	5	12	1
High	F1Q0C1	DOP1 leucine zipper like protein A OS=Canis lupus familiaris OX=9615 GN=DOP1A PE=4 SV=3	C_familiaris	1	1	12	1
High	A0A5F4C9H9	Uncharacterized protein OS=Canis lupus familiaris OX=9615 PE=4 SV=1	C_familiaris	1	2	11	1
High	A0A5F4CJE6	T-cell surface glycoprotein CD3 epsilon chain OS=Canis lupus familiaris OX=9615 GN=CD3E PE=4 SV=1	C_familiaris	3	3	10	1
High	F1PPZ2	Ribonuclease A family member 4 OS=Canis lupus familiaris OX=9615 GN=RNASE4 PE=3 SV=3	C_familiaris	1	1	10	1
Medium	J9P0A1	ZFP2 zinc finger protein OS=Canis lupus familiaris OX=9615 GN=ZFP2 PE=4 SV=1	C_familiaris	1	1	10	1
High	A0A5F4DBN6	Glutathione-disulfide reductase OS=Canis lupus familiaris OX=9615 GN=GSR PE=4 SV=1	C_familiaris	1	1	9	1
High	A0A5F4CUP4	Uncharacterized protein OS=Canis lupus familiaris OX=9615 GN=SVIP PE=4 SV=1	C_familiaris	1	1	9	1
Low	A0A5F4CSR3	Protein phosphatase 2 regulatory subunit Bbeta OS=Canis lupus familiaris OX=9615 GN=PPP2R2B PE=4 SV=1	C_familiaris	1	1	9	1
High	F1PMM7	Cytoplasmic FMR1-interacting protein OS=Canis lupus familiaris OX=9615 GN=CYFIP2 PE=3 SV=3	C_familiaris	5	5	8	1
High	A0A5F4CE39	Protein phosphatase, Mg2+/Mn2+ dependent 1B OS=Canis lupus familiaris OX=9615 GN=PPM1B PE=4 SV=1	C_familiaris	3	3	8	1
High	J9P9U0	Uncharacterized protein OS=Canis lupus familiaris OX=9615 PE=4 SV=2	C_familiaris	1	1	8	1
High	A0A5F4C799	Proteasome subunit alpha 4 OS=Canis lupus familiaris OX=9615 GN=PSMA4 PE=4 SV=1	C_familiaris	1	1	8	1
Medium	A0A5F4CIG0	KAT8 regulatory NSL complex subunit 1 OS=Canis lupus familiaris OX=9615 GN=KANSL1 PE=4 SV=1	C_familiaris	1	1	8	1
Low	F1PJM2	Bromodomain containing 9 OS=Canis lupus familiaris OX=9615 GN=BRD9 PE=4 SV=3	C_familiaris	1	1	8	1
High	F1PFK6	Importin subunit alpha OS=Canis lupus familiaris OX=9615 GN=KPNA1 PE=3 SV=2	C_familiaris	4	4	7	1
High	F1PM77	Importin subunit alpha OS=Canis lupus familiaris OX=9615 GN=KPNA6 PE=3 SV=2	C_familiaris	4	4	7	1
High	E2RRD2	H15 domain-containing protein OS=Canis lupus familiaris OX=9615 PE=3 SV=3	C_familiaris	3	3	7	1
High	F1P832	Alpha-1,4 glucan phosphorylase OS=Canis lupus familiaris OX=9615 GN=PYGM PE=3 SV=2	C_familiaris	2	2	7	1
High	A0A5F4DFM8	Protein phosphatase, Mg2+/Mn2+ dependent 1A OS=Canis lupus familiaris OX=9615 GN=PPM1A PE=4 SV=1	C_familiaris	3	3	7	1
High	A0A5F4BPU2	Lymphocyte antigen 9 OS=Canis lupus familiaris OX=9615 GN=LY9 PE=4 SV=1	C_familiaris	1	1	7	1
High	E2QWE0	COP9 signalosome subunit 5 OS=Canis lupus familiaris OX=9615 GN=COPS5 PE=4 SV=1	C_familiaris	1	1	7	1
High	A0A5F4CQ29	Uncharacterized protein OS=Canis lupus familiaris OX=9615 PE=4 SV=1	C_familiaris	1	1	7	1
Low	E2RFG2	Solute carrier family 35 member E4 OS=Canis lupus familiaris OX=9615 GN=SLC35E4 PE=4 SV=2	C_familiaris	1	1	7	1
High	P52206	Guanine nucleotide-binding protein subunit alpha-11 (Fragment) OS=Canis lupus familiaris OX=9615 GN=GNA11 PE=2 SV=1	C_familiaris	2	2	6	1
High	D5IGC7	CD36 antigen OS=Canis lupus familiaris OX=9615 GN=CD36 PE=3 SV=1	C_familiaris	1	1	6	1
High	J9NZ03	RUN and FYVE domain containing 1 OS=Canis lupus familiaris OX=9615 GN=RUFY1 PE=4 SV=1	C_familiaris	1	1	6	1
High	A0A5F4DIN5	Calcium binding protein 39 like OS=Canis lupus familiaris OX=9615 GN=CAB39L PE=4 SV=1	C_familiaris	2	2	6	1
High	F1PWN6	NSFL1 cofactor OS=Canis lupus familiaris OX=9615 GN=NSFL1C PE=4 SV=3	C_familiaris	1	1	6	1
High	A0A5F4BZ49	Cytidine/uridine monophosphate kinase 1 OS=Canis lupus familiaris OX=9615 GN=CMPK1 PE=4 SV=1	C_familiaris	1	1	6	1
High	J9NZG6	Olfactory receptor OS=Canis lupus familiaris OX=9615 GN=LOC484987 PE=3 SV=2	C_familiaris	1	2	6	1
High	F1PBA0	Uncharacterized protein OS=Canis lupus familiaris OX=9615 PE=4 SV=3	C_familiaris	1	1	6	1
High	E2RPD7	CCHC-type zinc finger nucleic acid binding protein OS=Canis lupus familiaris OX=9615 GN=CNBP PE=4 SV=3	C_familiaris	1	1	6	1
Medium	A0A5F4CI60	Ecto-NOX disulfide-thiol exchanger 1 OS=Canis lupus familiaris OX=9615 GN=ENOX1 PE=4 SV=1	C_familiaris	1	6	6	1
Low	A0A5F4DBV4	Retinol binding protein 2 OS=Canis lupus familiaris OX=9615 GN=RBP2 PE=4 SV=1	C_familiaris	1	1	6	1
Low	F1PFZ8	Serine/threonine kinase 40 OS=Canis lupus familiaris OX=9615 GN=STK40 PE=4 SV=3	C_familiaris	1	1	6	1
High	J9NYN4	Uncharacterized protein OS=Canis lupus familiaris OX=9615 GN=TGOLN2 PE=4 SV=1	C_familiaris	1	1	5	1
High	A0A5F4BR24	Uncharacterized protein OS=Canis lupus familiaris OX=9615 PE=4 SV=1	C_familiaris	2	3	5	1
High	E2RRY7	Uridine monophosphate synthetase OS=Canis lupus familiaris OX=9615 GN=UMPS PE=3 SV=1	C_familiaris	1	1	5	1
High	F1Q0K5	Triokinase and FMN cyclase OS=Canis lupus familiaris OX=9615 GN=TKFC PE=4 SV=2	C_familiaris	1	1	5	1
High	F1PZ37	MARVEL domain-containing protein OS=Canis lupus familiaris OX=9615 PE=4 SV=3	C_familiaris	1	1	5	1
High	B3RFJ1	ATP binding cassette subfamily G member 2 OS=Canis lupus familiaris OX=9615 GN=ABCG2 PE=2 SV=1	C_familiaris	1	1	5	1
Low	A0A5F4BRT3	Zinc finger and BTB domain containing 21 OS=Canis lupus familiaris OX=9615 GN=ZBTB21 PE=4 SV=1	C_familiaris	1	1	5	1
Low	E2RDL0	Interleukin 1 receptor associated kinase 4 OS=Canis lupus familiaris OX=9615 GN=IRAK4 PE=4 SV=3	C_familiaris	1	1	5	1
Low	J9P599	Glucocorticoid induced 1 OS=Canis lupus familiaris OX=9615 GN=GLCCI1 PE=4 SV=2	C_familiaris	1	1	5	1
High	E2RKG6	Dermokine OS=Canis lupus familiaris OX=9615 GN=DMKN PE=4 SV=3	C_familiaris	1	2	4	1
High	F6X870	Peptidylglycine alpha-amidating monooxygenase OS=Canis lupus familiaris OX=9615 GN=PAM PE=4 SV=2	C_familiaris	1	1	4	1
High	E2R5F0	Intercellular adhesion molecule 2 OS=Canis lupus familiaris OX=9615 GN=ICAM2 PE=4 SV=2	C_familiaris	1	2	4	1
High	A0A5F4CXX0	Reticulon 3 OS=Canis lupus familiaris OX=9615 GN=RTN3 PE=4 SV=1	C_familiaris	1	1	4	1
High	F1PMB5	Sorting nexin 2 OS=Canis lupus familiaris OX=9615 GN=SNX2 PE=4 SV=3	C_familiaris	2	2	4	1
High	A0A5F4DF61	Insulin like growth factor 2 OS=Canis lupus familiaris OX=9615 GN=IGF2 PE=4 SV=1	C_familiaris	1	1	4	1
High	E2R066	Serpin family B member 13 OS=Canis lupus familiaris OX=9615 GN=SERPINB13 PE=3 SV=2	C_familiaris	1	1	4	1
High	F1Q4I3	MARVEL domain-containing protein OS=Canis lupus familiaris OX=9615 PE=4 SV=3	C_familiaris	1	1	4	1
High	E2QWN4	N-acetylneuraminate synthase OS=Canis lupus familiaris OX=9615 GN=NANS PE=4 SV=2	C_familiaris	1	1	4	1
High	A0A5F4C9U8	Bruton tyrosine kinase OS=Canis lupus familiaris OX=9615 GN=BTK PE=4 SV=1	C_familiaris	1	1	4	1
High	L7N0C2	RRM domain-containing protein OS=Canis lupus familiaris OX=9615 PE=4 SV=2	C_familiaris	1	1	4	1
High	F1PMK7	Matrix metallopeptidase 2 OS=Canis lupus familiaris OX=9615 GN=MMP2 PE=3 SV=3	C_familiaris	1	1	4	1
High	F6UT80	Calcium homeostasis modulator family member 5 OS=Canis lupus familiaris OX=9615 GN=CALHM5 PE=4 SV=2	C_familiaris	1	1	4	1
High	A0A5F4CVM1	ATP synthase inhibitory factor subunit 1 OS=Canis lupus familiaris OX=9615 GN=ATP5IF1 PE=4 SV=1	C_familiaris	1	1	4	1
High	A0A5F4CTV8	Eukaryotic translation initiation factor 1A X-linked OS=Canis lupus familiaris OX=9615 GN=EIF1AX PE=4 SV=1	C_familiaris	1	1	4	1
High	F1PFB4	Fermitin family member 2 OS=Canis lupus familiaris OX=9615 GN=FERMT2 PE=4 SV=3	C_familiaris	1	1	4	1
Medium	F1Q466	Acetyl-CoA acetyltransferase 2 OS=Canis lupus familiaris OX=9615 GN=ACAT2 PE=3 SV=2	C_familiaris	1	1	4	1
Medium	A0A5F4CIX8	Matrix remodeling associated 5 OS=Canis lupus familiaris OX=9615 GN=MXRA5 PE=4 SV=1	C_familiaris	1	1	4	1
Medium	A0A5F4C1I5	Collagen type V alpha 2 chain OS=Canis lupus familiaris OX=9615 GN=COL5A2 PE=4 SV=1	C_familiaris	1	1	4	1
Medium	F1PM98	Collagen type IV alpha 3 chain OS=Canis lupus familiaris OX=9615 GN=COL4A3 PE=4 SV=3	C_familiaris	1	1	4	1
Medium	F1PHD7	Uncharacterized protein OS=Canis lupus familiaris OX=9615 GN=CFAP47 PE=4 SV=3	C_familiaris	1	1	4	1
Low	A0A5F4D532	Uncharacterized protein OS=Canis lupus familiaris OX=9615 PE=4 SV=1	C_familiaris	1	1	4	1
Low	F6X7F9	Thyroid hormone receptor interactor 12 OS=Canis lupus familiaris OX=9615 GN=TRIP12 PE=4 SV=2	C_familiaris	1	1	4	1
High	P27597	T-cell surface glycoprotein CD3 epsilon chain OS=Canis lupus familiaris OX=9615 GN=CD3E PE=2 SV=1	C_familiaris	3	3	3	1
High	A0A5F4D3P5	Uncharacterized protein OS=Canis lupus familiaris OX=9615 PE=4 SV=1	C_familiaris	1	2	3	1
High	A0A5K1U2R9	Solute carrier family 2 member 8 OS=Canis lupus familiaris OX=9615 GN=SLC2A8 PE=4 SV=1	C_familiaris	1	1	3	1
High	A0A5F4C8U2	Major histocompatibility complex, class II, DQ beta 2 OS=Canis lupus familiaris OX=9615 GN=HLA-DQB2 PE=4 SV=1	C_familiaris	1	1	3	1
High	F1PCS8	CD93 molecule OS=Canis lupus familiaris OX=9615 GN=CD93 PE=4 SV=2	C_familiaris	1	1	3	1
High	E2RA70	C-C motif chemokine OS=Canis lupus familiaris OX=9615 GN=CCL16 PE=3 SV=3	C_familiaris	1	1	3	1
High	A0A5F4DH19	Mucin 13, cell surface associated OS=Canis lupus familiaris OX=9615 GN=MUC13 PE=4 SV=1	C_familiaris	1	1	3	1
High	F1PV58	Importin subunit alpha OS=Canis lupus familiaris OX=9615 GN=KPNA3 PE=3 SV=3	C_familiaris	2	2	3	1
High	A0A5F4CWJ4	Sorting nexin 1 OS=Canis lupus familiaris OX=9615 GN=SNX1 PE=4 SV=1	C_familiaris	2	2	3	1
High	A0A5F4BSJ2	Uncharacterized protein OS=Canis lupus familiaris OX=9615 PE=4 SV=1	C_familiaris	1	1	3	1
High	E2R501	COP9 signalosome subunit 7B OS=Canis lupus familiaris OX=9615 GN=COPS7B PE=4 SV=1	C_familiaris	1	1	3	1
High	H9GW98	Metallothionein OS=Canis lupus familiaris OX=9615 GN=MT1E PE=3 SV=2	C_familiaris	1	1	3	1
High	F1PPZ7	Aldo-keto reductase family 7 like (gene/pseudogene) OS=Canis lupus familiaris OX=9615 GN=AKR7L PE=4 SV=2	C_familiaris	1	1	3	1
High	F1PCD8	Laminin subunit beta 1 OS=Canis lupus familiaris OX=9615 GN=LAMB1 PE=4 SV=3	C_familiaris	1	1	3	1
High	A0A5F4C217	ATPase H+ transporting V1 subunit H OS=Canis lupus familiaris OX=9615 GN=ATP6V1H PE=4 SV=1	C_familiaris	1	1	3	1
High	A0A5F4CIL5	TIMP metallopeptidase inhibitor 3 OS=Canis lupus familiaris OX=9615 GN=TIMP3 PE=4 SV=1	C_familiaris	1	1	3	1
High	E2R580	VAMP associated protein A OS=Canis lupus familiaris OX=9615 GN=VAPA PE=4 SV=1	C_familiaris	1	1	3	1
High	F6X6J3	ST8 alpha-N-acetyl-neuraminide alpha-2,8-sialyltransferase 4 OS=Canis lupus familiaris OX=9615 GN=ST8SIA4 PE=3 SV=2	C_familiaris	1	1	3	1
High	A0A5F4CIY8	Uncharacterized protein OS=Canis lupus familiaris OX=9615 PE=4 SV=1	C_familiaris	1	1	3	1
High	F1PGY4	Proteasome 26S subunit, non-ATPase 14 OS=Canis lupus familiaris OX=9615 GN=PSMD14 PE=4 SV=2	C_familiaris	1	1	3	1
High	A0A5F4C880	Uncharacterized protein OS=Canis lupus familiaris OX=9615 PE=4 SV=1	C_familiaris	1	1	3	1
High	E2RLJ1	Family with sequence similarity 13 member B OS=Canis lupus familiaris OX=9615 GN=FAM13B PE=4 SV=2	C_familiaris	1	1	3	1
High	E2R2A4	Purine rich element binding protein A OS=Canis lupus familiaris OX=9615 GN=PURA PE=4 SV=3	C_familiaris	1	1	3	1
High	A0A5F4BWD4	Endonuclease domain containing 1 OS=Canis lupus familiaris OX=9615 GN=ENDOD1 PE=4 SV=1	C_familiaris	1	1	3	1
High	E2REY0	Proteasomal ATPase associated factor 1 OS=Canis lupus familiaris OX=9615 GN=PAAF1 PE=4 SV=1	C_familiaris	1	1	3	1
High	A0A5F4D9U3	Late endosomal/lysosomal adaptor, MAPK and MTOR activator 4 OS=Canis lupus familiaris OX=9615 GN=LAMTOR4 PE=4 SV=1	C_familiaris	1	1	3	1
High	F1PJ16	Coiled-coil domain containing 180 OS=Canis lupus familiaris OX=9615 GN=CCDC180 PE=4 SV=3	C_familiaris	1	1	3	1
High	F1PQ04	Protein phosphatase 2 scaffold subunit Abeta OS=Canis lupus familiaris OX=9615 GN=PPP2R1B PE=4 SV=3	C_familiaris	1	1	3	1
Medium	J9P2A2	Hypoxanthine phosphoribosyltransferase OS=Canis lupus familiaris OX=9615 GN=PRTFDC1 PE=3 SV=2	C_familiaris	1	1	3	1
Medium	A0A5F4BZ48	Rho guanine nucleotide exchange factor 39 OS=Canis lupus familiaris OX=9615 GN=ARHGEF39 PE=4 SV=1	C_familiaris	1	1	3	1
Medium	F1PC03	IQ motif containing F1 OS=Canis lupus familiaris OX=9615 GN=IQCF1 PE=4 SV=2	C_familiaris	1	1	3	1
Medium	A0A5F4CCM2	Phospholipid scramblase 1 OS=Canis lupus familiaris OX=9615 GN=PLSCR1 PE=4 SV=1	C_familiaris	1	1	3	1
Low	J9NU35	EF-hand calcium binding domain 5 OS=Canis lupus familiaris OX=9615 GN=EFCAB5 PE=4 SV=2	C_familiaris	1	1	3	1
Low	E2RA42	UDP glycosyltransferase 8 OS=Canis lupus familiaris OX=9615 GN=UGT8 PE=3 SV=1	C_familiaris	1	1	3	1
High	A0A5F4CDH5	Uncharacterized protein OS=Canis lupus familiaris OX=9615 GN=RETNLB PE=4 SV=1	C_familiaris	1	1	2	1
High	A0A5F4CQR5	Cell migration inducing hyaluronidase 2 OS=Canis lupus familiaris OX=9615 GN=CEMIP2 PE=4 SV=1	C_familiaris	2	2	2	1
High	E2R469	Formyl peptide receptor 2 OS=Canis lupus familiaris OX=9615 GN=FPR2 PE=3 SV=2	C_familiaris	1	1	2	1
High	J9P095	Stanniocalcin 2 OS=Canis lupus familiaris OX=9615 GN=STC2 PE=4 SV=1	C_familiaris	1	1	2	1
High	J9NSD0	Density-regulated protein OS=Canis lupus familiaris OX=9615 GN=DENR PE=3 SV=1	C_familiaris	1	1	2	1
High	A0A5F4CVC8	Major facilitator superfamily domain containing 2B OS=Canis lupus familiaris OX=9615 GN=MFSD2B PE=4 SV=1	C_familiaris	1	1	2	1
High	F1PR74	Malignant fibrous histiocytoma amplified sequence 1 OS=Canis lupus familiaris OX=9615 GN=MFHAS1 PE=4 SV=3	C_familiaris	1	1	2	1
High	E2QXY8	HVEM OS=Canis lupus familiaris OX=9615 GN=TNFRSF14 PE=2 SV=2	C_familiaris	1	1	2	1
High	A0A5F4CA83	LRR binding FLII interacting protein 2 OS=Canis lupus familiaris OX=9615 GN=LRRFIP2 PE=4 SV=1	C_familiaris	1	1	2	1
High	E2R1M6	Phosphohistidine phosphatase 1 OS=Canis lupus familiaris OX=9615 GN=PHPT1 PE=4 SV=3	C_familiaris	1	1	2	1
High	A0A5F4CVA7	Myosin light chain, phosphorylatable, fast skeletal muscle OS=Canis lupus familiaris OX=9615 GN=MYLPF PE=4 SV=1	C_familiaris	1	1	2	1
High	J9NVT2	Hypoxanthine phosphoribosyltransferase OS=Canis lupus familiaris OX=9615 GN=HPRT1 PE=3 SV=1	C_familiaris	1	1	2	1
High	A0A5F4BRI8	SEC23 homolog B, coat complex II component OS=Canis lupus familiaris OX=9615 GN=SEC23B PE=4 SV=1	C_familiaris	1	1	2	1
High	A0A5F4C6P0	Protein arginine methyltransferase 5 OS=Canis lupus familiaris OX=9615 GN=PRMT5 PE=4 SV=1	C_familiaris	1	1	2	1
High	A0A5F4DKK4	Secretory carrier membrane protein 1 OS=Canis lupus familiaris OX=9615 GN=SCAMP1 PE=4 SV=1	C_familiaris	1	1	2	1
High	E2R974	Fatty acid binding protein 4 OS=Canis lupus familiaris OX=9615 GN=FABP4 PE=3 SV=1	C_familiaris	1	1	2	1
High	F1PTG8	Trifunctional purine biosynthetic protein adenosine-3 OS=Canis lupus familiaris OX=9615 GN=LOC100856570 PE=3 SV=3	C_familiaris	1	1	2	1
High	F1P8F6	Syntaxin 11 OS=Canis lupus familiaris OX=9615 GN=STX11 PE=3 SV=3	C_familiaris	1	1	2	1
High	F6XYD3	FYN binding protein 1 OS=Canis lupus familiaris OX=9615 GN=FYB1 PE=4 SV=2	C_familiaris	1	1	2	1
High	A0A5F4BR75	Uncharacterized protein OS=Canis lupus familiaris OX=9615 PE=4 SV=1	C_familiaris	1	1	2	1
High	A0A5F4C866	Protein tyrosine phosphatase receptor type G OS=Canis lupus familiaris OX=9615 GN=PTPRG PE=4 SV=1	C_familiaris	1	1	2	1
High	F1PIL9	Interleukin 1 receptor accessory protein OS=Canis lupus familiaris OX=9615 GN=IL1RAP PE=4 SV=3	C_familiaris	1	1	2	1
High	A0A5F4D856	Proline-serine-threonine phosphatase interacting protein 1 OS=Canis lupus familiaris OX=9615 GN=PSTPIP1 PE=4 SV=1	C_familiaris	1	1	2	1
High	J9P2Y0	GABA type A receptor associated protein like 2 OS=Canis lupus familiaris OX=9615 GN=GABARAPL2 PE=3 SV=1	C_familiaris	1	1	2	1
High	F1Q1D5	Protein kinase C OS=Canis lupus familiaris OX=9615 GN=PRKCA PE=3 SV=3	C_familiaris	2	2	2	1
High	A0A5F4BQI4	Uncharacterized protein OS=Canis lupus familiaris OX=9615 GN=FUOM PE=4 SV=1	C_familiaris	1	1	2	1
High	A0A5F4CZF3	Uncharacterized protein OS=Canis lupus familiaris OX=9615 PE=4 SV=1	C_familiaris	1	1	2	1
High	E2RKK6	Protein kinase C substrate 80K-H OS=Canis lupus familiaris OX=9615 GN=PRKCSH PE=4 SV=2	C_familiaris	1	1	2	1
High	F1PZU7	Uncharacterized protein OS=Canis lupus familiaris OX=9615 GN=LRRC57 PE=4 SV=2	C_familiaris	1	1	2	1
High	A0A5F4DD46	Protein tyrosine phosphatase 4A2 OS=Canis lupus familiaris OX=9615 GN=PTP4A2 PE=4 SV=1	C_familiaris	1	1	2	1
High	E2QUZ2	Tetraspanin OS=Canis lupus familiaris OX=9615 GN=CD53 PE=3 SV=1	C_familiaris	1	1	2	1
High	E2R9R5	Peptidylprolyl isomerase OS=Canis lupus familiaris OX=9615 GN=FKBP2 PE=4 SV=3	C_familiaris	1	1	2	1
High	E2R9Y9	Uncharacterized protein OS=Canis lupus familiaris OX=9615 GN=RPLP2 PE=3 SV=1	C_familiaris	1	1	2	1
High	A0A5F4DI49	Glycyl-tRNA synthetase OS=Canis lupus familiaris OX=9615 GN=GARS1 PE=4 SV=1	C_familiaris	1	1	2	1
High	A0A5F4C4Q1	Beta-2-microglobulin OS=Canis lupus familiaris OX=9615 GN=B2M PE=4 SV=1	C_familiaris	1	1	2	1
High	E2R578	Solute carrier family 25 member 11 OS=Canis lupus familiaris OX=9615 GN=SLC25A11 PE=3 SV=2	C_familiaris	1	1	2	1
High	A0A5F4BVX6	Acyl-CoA thioesterase 7 OS=Canis lupus familiaris OX=9615 GN=ACOT7 PE=4 SV=1	C_familiaris	1	1	2	1
High	F6V9G5	Syntaxin 4 OS=Canis lupus familiaris OX=9615 GN=STX4 PE=3 SV=1	C_familiaris	1	1	2	1
High	A0A5F4BS98	Protein kinase AMP-activated catalytic subunit alpha 1 OS=Canis lupus familiaris OX=9615 GN=PRKAA1 PE=4 SV=1	C_familiaris	1	1	2	1
High	F1PDC7	Notch receptor 1 OS=Canis lupus familiaris OX=9615 GN=NOTCH1 PE=4 SV=3	C_familiaris	1	1	2	1
High	F1Q0B2	MOB kinase activator 1B OS=Canis lupus familiaris OX=9615 GN=MOB1B PE=4 SV=3	C_familiaris	1	1	2	1
High	A0A5F4DHV0	Thioredoxin domain containing 17 OS=Canis lupus familiaris OX=9615 GN=TXNDC17 PE=4 SV=1	C_familiaris	1	1	2	1
High	F1PAP9	RuvB-like helicase OS=Canis lupus familiaris OX=9615 GN=RUVBL2 PE=3 SV=3	C_familiaris	1	1	2	1
High	F1PSC4	ELAV-like protein OS=Canis lupus familiaris OX=9615 GN=ELAVL1 PE=3 SV=3	C_familiaris	1	1	2	1
High	F1PI88	UDP-glucose 4-epimerase OS=Canis lupus familiaris OX=9615 GN=GALE PE=3 SV=3	C_familiaris	1	1	2	1
High	F1PIV1	Docking protein 3 OS=Canis lupus familiaris OX=9615 GN=DOK3 PE=4 SV=3	C_familiaris	1	1	2	1
High	E2QWL2	Calcium/calmodulin dependent protein kinase IV OS=Canis lupus familiaris OX=9615 GN=CAMK4 PE=3 SV=3	C_familiaris	1	1	2	1
Medium	A0A5F4DMB6	Uncharacterized protein OS=Canis lupus familiaris OX=9615 PE=4 SV=1	C_familiaris	1	1	2	1
Medium	F1PH98	Uncharacterized protein OS=Canis lupus familiaris OX=9615 GN=SLC7A5 PE=4 SV=3	C_familiaris	1	1	2	1
Medium	E2R7Z7	Solute carrier family 38 member 3 OS=Canis lupus familiaris OX=9615 GN=SLC38A3 PE=4 SV=1	C_familiaris	1	1	2	1
Medium	Q28278	Vitamin K-dependent protein C OS=Canis lupus familiaris OX=9615 GN=PROC PE=2 SV=2	C_familiaris	1	1	2	1
Medium	J9NU66	Acid phosphatase 1 OS=Canis lupus familiaris OX=9615 GN=ACP1 PE=4 SV=2	C_familiaris	1	1	2	1
Medium	J9P333	Uncharacterized protein OS=Canis lupus familiaris OX=9615 GN=LOC100855485 PE=4 SV=2	C_familiaris	1	1	2	1
Medium	Q5PU49	Protein kinase C delta type OS=Canis lupus familiaris OX=9615 GN=PRKCD PE=2 SV=1	C_familiaris	1	1	2	1
Medium	A0A5F4CNT5	Leupaxin OS=Canis lupus familiaris OX=9615 GN=LPXN PE=4 SV=1	C_familiaris	1	1	2	1
Medium	A0A5F4BQI3	Glutathione S-transferase omega 2 OS=Canis lupus familiaris OX=9615 GN=GSTO2 PE=4 SV=1	C_familiaris	1	1	2	1
Medium	P00011	Cytochrome c OS=Canis lupus familiaris OX=9615 GN=CYCS PE=1 SV=2	C_familiaris	1	1	2	1
Medium	E2RJN2	Cathepsin E OS=Canis lupus familiaris OX=9615 GN=CTSE PE=3 SV=2	C_familiaris	1	1	2	1
Medium	J9P9Z7	Ribosomal_S10 domain-containing protein OS=Canis lupus familiaris OX=9615 GN=RPS20 PE=3 SV=1	C_familiaris	1	1	2	1
Medium	E2RID6	Dystrophin related protein 2 OS=Canis lupus familiaris OX=9615 GN=DRP2 PE=4 SV=3	C_familiaris	1	1	2	1
Medium	J9P0X7	Coactosin like F-actin binding protein 1 OS=Canis lupus familiaris OX=9615 GN=COTL1 PE=4 SV=2	C_familiaris	1	1	2	1
Medium	E2R5N5	Proteasome 26S subunit, non-ATPase 13 OS=Canis lupus familiaris OX=9615 GN=PSMD13 PE=4 SV=1	C_familiaris	1	1	2	1
Medium	J9NYA9	Short chain dehydrogenase/reductase family 42E, member 1 OS=Canis lupus familiaris OX=9615 GN=SDR42E1 PE=3 SV=1	C_familiaris	1	1	2	1
Medium	E2RLT0	SET domain containing 5 OS=Canis lupus familiaris OX=9615 GN=SETD5 PE=4 SV=2	C_familiaris	1	1	2	1
Medium	F1P7C2	Alanyl-tRNA synthetase OS=Canis lupus familiaris OX=9615 GN=AARS1 PE=3 SV=2	C_familiaris	1	1	2	1
Medium	F1PRB9	Membrane associated ring-CH-type finger 8 OS=Canis lupus familiaris OX=9615 GN=MARCHF8 PE=4 SV=2	C_familiaris	1	1	2	1
Medium	A0A5F4DB54	Kelch like family member 7 OS=Canis lupus familiaris OX=9615 GN=KLHL7 PE=4 SV=1	C_familiaris	1	1	2	1
Medium	E2R065	Serpin family B member 12 OS=Canis lupus familiaris OX=9615 GN=SERPINB12 PE=3 SV=2	C_familiaris	1	1	2	1
Medium	P49256	Vesicular integral-membrane protein VIP36 OS=Canis lupus familiaris OX=9615 GN=LMAN2 PE=1 SV=1	C_familiaris	1	1	2	1
Medium	A0A5F4DB13	Amyloid beta precursor protein binding family B member 1 OS=Canis lupus familiaris OX=9615 GN=APBB1 PE=4 SV=1	C_familiaris	1	1	2	1
Low	A0A5F4DCB1	Uncharacterized protein OS=Canis lupus familiaris OX=9615 PE=4 SV=1	C_familiaris	1	1	2	1
Low	F1Q3S9	ATP-dependent 6-phosphofructokinase OS=Canis lupus familiaris OX=9615 GN=PFKL PE=3 SV=2	C_familiaris	1	1	2	1
Low	F1PIH9	HYDIN axonemal central pair apparatus protein OS=Canis lupus familiaris OX=9615 GN=HYDIN PE=4 SV=3	C_familiaris	1	1	2	1
Low	A0A5F4CXG7	CD84 molecule OS=Canis lupus familiaris OX=9615 GN=CD84 PE=4 SV=1	C_familiaris	1	1	2	1
Low	J9NSV8	Ribonuclease P/MRP subunit p30 OS=Canis lupus familiaris OX=9615 GN=RPP30 PE=4 SV=1	C_familiaris	1	1	2	1
Low	A0A5F4DIW0	Sorting nexin 5 OS=Canis lupus familiaris OX=9615 GN=SNX5 PE=4 SV=1	C_familiaris	1	1	2	1
Low	A0A5F4D5F5	SRC kinase signaling inhibitor 1 OS=Canis lupus familiaris OX=9615 GN=SRCIN1 PE=4 SV=1	C_familiaris	1	1	2	1
Low	A0A5F4D9V8	Phosphatidylinositol-4,5-bisphosphate 3-kinase catalytic subunit beta OS=Canis lupus familiaris OX=9615 GN=PIK3CB PE=4 SV=1	C_familiaris	1	1	2	1
Low	F1PJA4	Phospholipid-transporting ATPase OS=Canis lupus familiaris OX=9615 GN=ATP8B4 PE=3 SV=3	C_familiaris	1	1	2	1
Low	F1PCZ0	Septin 5 OS=Canis lupus familiaris OX=9615 GN=SEPTIN5 PE=3 SV=2	C_familiaris	1	1	2	1
Low	E2QYS7	Parkin coregulated like OS=Canis lupus familiaris OX=9615 GN=PACRGL PE=4 SV=3	C_familiaris	1	1	2	1
Low	A0A5F4BVH9	Ligand dependent nuclear receptor corepressor OS=Canis lupus familiaris OX=9615 GN=LCOR PE=4 SV=1	C_familiaris	1	1	2	1
High	A0A5F4DG30	Uncharacterized protein OS=Canis lupus familiaris OX=9615 PE=4 SV=1	C_familiaris	1	1	1	1
High	F1PLM5	S-(hydroxymethyl)glutathione dehydrogenase OS=Canis lupus familiaris OX=9615 GN=ADH5 PE=3 SV=3	C_familiaris	1	1	1	1
High	E2R0X8	Mediator of cell motility 1 OS=Canis lupus familiaris OX=9615 GN=MEMO1 PE=4 SV=3	C_familiaris	1	1	1	1
High	G1K299	Beta-glucuronidase OS=Canis lupus familiaris OX=9615 GN=GUSB PE=3 SV=2	C_familiaris	1	1	1	1
High	F1PFF2	Protein S100 OS=Canis lupus familiaris OX=9615 GN=S100A11 PE=3 SV=3	C_familiaris	1	1	1	1
High	J9NUZ6	Peptidyl-prolyl cis-trans isomerase OS=Canis lupus familiaris OX=9615 GN=PPIC PE=3 SV=2	C_familiaris	1	1	1	1
High	A0A5F4DID6	Uncharacterized protein OS=Canis lupus familiaris OX=9615 PE=4 SV=1	C_familiaris	1	1	1	1
High	Q5WR09	V-type proton ATPase subunit G 1 OS=Canis lupus familiaris OX=9615 GN=ATP6V1G1 PE=3 SV=3	C_familiaris	1	1	1	1
High	A0A5F4CIA0	Aminopeptidase N OS=Canis lupus familiaris OX=9615 GN=ANPEP PE=4 SV=1	C_familiaris	1	1	1	1
High	A0A5F4D9W7	Insulin like growth factor binding protein 4 OS=Canis lupus familiaris OX=9615 GN=IGFBP4 PE=4 SV=1	C_familiaris	1	1	1	1
High	E2RGR9	Fumarate hydratase OS=Canis lupus familiaris OX=9615 GN=FH PE=3 SV=1	C_familiaris	1	1	1	1
High	A0A5F4CYV2	Succinate dehydrogenase complex flavoprotein subunit A OS=Canis lupus familiaris OX=9615 GN=SDHA PE=4 SV=1	C_familiaris	1	1	1	1
High	E2RI74	Phospholipase A2 activating protein OS=Canis lupus familiaris OX=9615 GN=PLAA PE=4 SV=3	C_familiaris	1	1	1	1
High	A0A5F4CCG7	Diacylglycerol lipase beta OS=Canis lupus familiaris OX=9615 GN=DAGLB PE=4 SV=1	C_familiaris	1	1	1	1
High	A0A5F4DJF0	Cystathionine gamma-lyase OS=Canis lupus familiaris OX=9615 GN=CTH PE=4 SV=1	C_familiaris	1	1	1	1
High	F1P687	Mannosidase alpha class 2C member 1 OS=Canis lupus familiaris OX=9615 GN=MAN2C1 PE=4 SV=3	C_familiaris	1	1	1	1
High	Q00M95	Inactive rhomboid protein 2 OS=Canis lupus familiaris OX=9615 GN=RHBDF2 PE=2 SV=1	C_familiaris	1	1	1	1
High	F1PVD9	PYM homolog 1, exon junction complex associated factor OS=Canis lupus familiaris OX=9615 GN=PYM1 PE=4 SV=2	C_familiaris	1	1	1	1
High	A0A5F4CEF0	Cytochrome b-245 beta chain OS=Canis lupus familiaris OX=9615 GN=CYBB PE=4 SV=1	C_familiaris	1	1	1	1
High	A0A5F4CXV1	Solute carrier family 6 member 9 OS=Canis lupus familiaris OX=9615 GN=SLC6A9 PE=4 SV=1	C_familiaris	1	1	1	1
High	A0A5F4DDS5	CD86 molecule OS=Canis lupus familiaris OX=9615 GN=CD86 PE=4 SV=1	C_familiaris	1	1	1	1
High	A0A5F4D0H1	Sorting nexin 9 OS=Canis lupus familiaris OX=9615 GN=SNX9 PE=4 SV=1	C_familiaris	1	1	1	1
High	F1PYF3	C-type lectin domain family 1 member B OS=Canis lupus familiaris OX=9615 GN=CLEC1B PE=4 SV=3	C_familiaris	1	1	1	1
High	F1PWB7	Non-specific cytotoxic cell receptor protein 1 homolog (zebrafish) OS=Canis lupus familiaris OX=9615 GN=NCCRP1 PE=4 SV=3	C_familiaris	1	1	1	1
High	E2RLY5	Leucine aminopeptidase 3 OS=Canis lupus familiaris OX=9615 GN=LAP3 PE=3 SV=2	C_familiaris	1	1	1	1
High	E2RMQ5	CD200 molecule OS=Canis lupus familiaris OX=9615 GN=CD200 PE=4 SV=3	C_familiaris	1	1	1	1
High	J9P7Y8	Uncharacterized protein OS=Canis lupus familiaris OX=9615 PE=3 SV=2	C_familiaris	1	1	1	1
High	E2REP2	Trafficking from ER to golgi regulator OS=Canis lupus familiaris OX=9615 GN=TFG PE=4 SV=2	C_familiaris	1	1	1	1
High	F1PJ67	Chloride channel protein OS=Canis lupus familiaris OX=9615 GN=CLCN2 PE=3 SV=2	C_familiaris	1	1	1	1
High	J9P0R8	Zinc finger protein 219 OS=Canis lupus familiaris OX=9615 GN=ZNF219 PE=4 SV=2	C_familiaris	1	1	1	1
High	J9P7W8	Inositol-1-monophosphatase OS=Canis lupus familiaris OX=9615 GN=IMPA1 PE=3 SV=1	C_familiaris	1	1	1	1
High	A0A5F4CXK4	Uncharacterized protein OS=Canis lupus familiaris OX=9615 GN=TMSB4X PE=4 SV=1	C_familiaris	1	1	1	1
High	J9NVM8	Solute carrier family 16 member 3 OS=Canis lupus familiaris OX=9615 GN=SLC16A3 PE=4 SV=2	C_familiaris	1	1	1	1
High	E2QWG8	Eukaryotic translation initiation factor 3 subunit M OS=Canis lupus familiaris OX=9615 GN=EIF3M PE=3 SV=1	C_familiaris	1	1	1	1
High	E2RFE5	Sorting nexin 17 OS=Canis lupus familiaris OX=9615 GN=SNX17 PE=4 SV=2	C_familiaris	1	1	1	1
High	A0A5F4CPI7	Heterogeneous nuclear ribonucleoprotein A2/B1 OS=Canis lupus familiaris OX=9615 GN=HNRNPA2B1 PE=4 SV=1	C_familiaris	1	1	1	1
High	F6UX32	NUMB endocytic adaptor protein OS=Canis lupus familiaris OX=9615 GN=NUMB PE=4 SV=2	C_familiaris	1	1	1	1
High	A0A5F4CAQ3	Uncharacterized protein OS=Canis lupus familiaris OX=9615 PE=4 SV=1	C_familiaris	1	1	1	1
High	E2RLN5	AP complex subunit sigma OS=Canis lupus familiaris OX=9615 GN=AP1S1 PE=3 SV=2	C_familiaris	1	1	1	1
High	A0A5F4CJR2	Hypoxia up-regulated 1 OS=Canis lupus familiaris OX=9615 GN=HYOU1 PE=4 SV=1	C_familiaris	1	1	1	1
High	F1PRW2	C5a anaphylatoxin chemotactic receptor 1 OS=Canis lupus familiaris OX=9615 GN=C5AR1 PE=3 SV=1	C_familiaris	1	1	1	1
High	A0A5F4C5B7	SEC24 homolog C, COPII coat complex component OS=Canis lupus familiaris OX=9615 GN=SEC24C PE=4 SV=1	C_familiaris	1	1	1	1
High	E2QYQ0	Adenine phosphoribosyltransferase OS=Canis lupus familiaris OX=9615 GN=APRT PE=3 SV=1	C_familiaris	1	1	1	1
High	A0A5F4BP76	Aldehyde dehydrogenase 9 family member A1 OS=Canis lupus familiaris OX=9615 GN=ALDH9A1 PE=4 SV=1	C_familiaris	1	1	1	1
High	F1PTR6	Ig-like domain-containing protein OS=Canis lupus familiaris OX=9615 GN=DLA-DQA1 PE=3 SV=3	C_familiaris	1	1	1	1
High	F1Q406	T-complex protein 1 subunit eta OS=Canis lupus familiaris OX=9615 GN=CCT7 PE=3 SV=2	C_familiaris	1	1	1	1
High	A0A5F4D5L8	Heterogeneous nuclear ribonucleoprotein M OS=Canis lupus familiaris OX=9615 GN=HNRNPM PE=4 SV=1	C_familiaris	1	1	1	1
High	A0A5F4D1I6	Betaine--homocysteine S-methyltransferase 2 OS=Canis lupus familiaris OX=9615 GN=BHMT2 PE=4 SV=1	C_familiaris	1	1	1	1
High	E2QW67	TSPY like 2 OS=Canis lupus familiaris OX=9615 GN=TSPYL2 PE=3 SV=2	C_familiaris	1	1	1	1
High	E2RS49	40S ribosomal protein S25 OS=Canis lupus familiaris OX=9615 GN=RPS25 PE=3 SV=3	C_familiaris	1	1	1	1
High	F1PJV8	Solute carrier family 38 member 5 OS=Canis lupus familiaris OX=9615 GN=SLC38A5 PE=4 SV=3	C_familiaris	1	1	1	1
High	A0A5F4DI72	WNK lysine deficient protein kinase 1 OS=Canis lupus familiaris OX=9615 GN=WNK1 PE=4 SV=1	C_familiaris	1	1	1	1
High	A0A5F4CI19	Protein tyrosine phosphatase non-receptor type 6 OS=Canis lupus familiaris OX=9615 GN=PTPN6 PE=4 SV=1	C_familiaris	1	1	1	1
High	A0A5F4CBH8	Synaptotagmin like 2 OS=Canis lupus familiaris OX=9615 GN=SYTL2 PE=4 SV=1	C_familiaris	1	1	1	1
High	A0A5F4C306	Centrosomal protein 162 OS=Canis lupus familiaris OX=9615 GN=CEP162 PE=4 SV=1	C_familiaris	1	1	1	1
High	F1P9R5	Transmembrane protein 192 OS=Canis lupus familiaris OX=9615 GN=TMEM192 PE=4 SV=3	C_familiaris	1	1	1	1
High	A0A5F4DKV6	Family with sequence similarity 49 member B OS=Canis lupus familiaris OX=9615 GN=FAM49B PE=4 SV=1	C_familiaris	1	1	1	1
High	A0A5F4C665	SH3 domain containing GRB2 like, endophilin B2 OS=Canis lupus familiaris OX=9615 GN=SH3GLB2 PE=4 SV=1	C_familiaris	1	1	1	1
High	A0A5F4CWC9	Uncharacterized protein OS=Canis lupus familiaris OX=9615 PE=4 SV=1	C_familiaris	1	1	1	1
Medium	E2RST8	Heparanase OS=Canis lupus familiaris OX=9615 GN=HPSE PE=4 SV=1	C_familiaris	1	1	1	1
Medium	E2RTK6	Charged multivesicular body protein 1A OS=Canis lupus familiaris OX=9615 GN=CHMP1A PE=4 SV=1	C_familiaris	1	1	1	1
Medium	A0A5F4DHX6	Uncharacterized protein OS=Canis lupus familiaris OX=9615 GN=NPM1 PE=4 SV=1	C_familiaris	1	1	1	1
Medium	E2RGQ5	S10_plectin domain-containing protein OS=Canis lupus familiaris OX=9615 GN=RPS10 PE=4 SV=1	C_familiaris	1	1	1	1
Medium	E2RQ08	Dolichyl-diphosphooligosaccharide--protein glycosyltransferase subunit 1 OS=Canis lupus familiaris OX=9615 GN=RPN1 PE=1 SV=1	C_familiaris	1	1	1	1
Medium	E2R9K4	Exportin 1 OS=Canis lupus familiaris OX=9615 GN=XPO1 PE=4 SV=2	C_familiaris	1	1	1	1
Medium	J9NWJ0	Peptidoglycan-recognition protein OS=Canis lupus familiaris OX=9615 GN=PGLYRP1 PE=3 SV=1	C_familiaris	1	1	1	1
Medium	A0A5F4CYQ6	Ubiquitin carboxyl-terminal hydrolase 11 OS=Canis lupus familiaris OX=9615 GN=USP11 PE=4 SV=1	C_familiaris	1	1	1	1
Medium	A0A5F4C057	Uncharacterized protein OS=Canis lupus familiaris OX=9615 PE=4 SV=1	C_familiaris	1	1	1	1
Medium	A0A5F4CPI8	Prostaglandin G/H synthase 1 OS=Canis lupus familiaris OX=9615 GN=PTGS1 PE=4 SV=1	C_familiaris	1	1	1	1
Medium	J9NYJ6	TBC1 domain family member 15 OS=Canis lupus familiaris OX=9615 GN=TBC1D15 PE=4 SV=2	C_familiaris	1	1	1	1
Medium	F1PRL5	Solute carrier family 25 member 5 OS=Canis lupus familiaris OX=9615 GN=SLC25A5 PE=3 SV=2	C_familiaris	1	1	1	1
Medium	A0A5F4CQZ6	PDZ and LIM domain 5 OS=Canis lupus familiaris OX=9615 GN=PDLIM5 PE=4 SV=1	C_familiaris	1	1	1	1
Medium	Q3LSL6	C-X-C chemokine receptor type 4 OS=Canis lupus familiaris OX=9615 GN=CXCR4 PE=2 SV=1	C_familiaris	1	1	1	1
Medium	A0A5F4D1I9	Solute carrier family 6 member 4 OS=Canis lupus familiaris OX=9615 GN=SLC6A4 PE=4 SV=1	C_familiaris	1	1	1	1
Medium	E2RGZ3	Insulin degrading enzyme OS=Canis lupus familiaris OX=9615 GN=IDE PE=3 SV=2	C_familiaris	1	1	1	1
Medium	E2R9Q1	Uncharacterized protein OS=Canis lupus familiaris OX=9615 GN=LOC100685649 PE=4 SV=3	C_familiaris	1	1	1	1
Medium	E2R0A7	Glycine-N-acyltransferase OS=Canis lupus familiaris OX=9615 GN=GLYAT PE=4 SV=3	C_familiaris	1	1	1	1
Medium	A0A5F4CZ04	Oxidation resistance 1 OS=Canis lupus familiaris OX=9615 GN=OXR1 PE=4 SV=1	C_familiaris	1	1	1	1
Medium	J9NT52	Chromosome 6 C16orf71 homolog OS=Canis lupus familiaris OX=9615 GN=C6H16orf71 PE=4 SV=2	C_familiaris	1	1	1	1
Medium	E2RQX1	Coiled-coil domain containing 6 OS=Canis lupus familiaris OX=9615 GN=CCDC6 PE=4 SV=3	C_familiaris	1	1	1	1
Medium	E2RJL1	Uncharacterized protein OS=Canis lupus familiaris OX=9615 GN=LGALS1 PE=4 SV=2	C_familiaris	1	1	1	1
Medium	J9NRF6	Extended synaptotagmin 1 OS=Canis lupus familiaris OX=9615 GN=ESYT1 PE=4 SV=2	C_familiaris	1	1	1	1
Medium	E2RBJ5	Uroporphyrinogen III synthase OS=Canis lupus familiaris OX=9615 GN=UROS PE=4 SV=1	C_familiaris	1	1	1	1
Medium	E2RJW5	Elongation factor for RNA polymerase II OS=Canis lupus familiaris OX=9615 GN=ELL PE=4 SV=3	C_familiaris	1	1	1	1
Medium	F1PV31	Transforming acidic coiled-coil containing protein 2 OS=Canis lupus familiaris OX=9615 GN=TACC2 PE=4 SV=3	C_familiaris	1	1	1	1
Medium	A0A5F4CY86	Sorting nexin 15 OS=Canis lupus familiaris OX=9615 GN=SNX15 PE=4 SV=1	C_familiaris	1	1	1	1
Medium	F1PU32	MAPK activated protein kinase 3 OS=Canis lupus familiaris OX=9615 GN=MAPKAPK3 PE=3 SV=3	C_familiaris	1	1	1	1
Medium	A0A5F4BQ86	Uncharacterized protein OS=Canis lupus familiaris OX=9615 GN=AP2M1 PE=4 SV=1	C_familiaris	1	1	1	1
Medium	E2QXP7	M-phase phosphoprotein 9 OS=Canis lupus familiaris OX=9615 GN=MPHOSPH9 PE=4 SV=2	C_familiaris	1	1	1	1
Medium	F1PRV7	Uncharacterized protein OS=Canis lupus familiaris OX=9615 PE=4 SV=3	C_familiaris	1	1	1	1
Medium	A0A5F4D2C8	Uncharacterized protein OS=Canis lupus familiaris OX=9615 GN=SUMO3 PE=4 SV=1	C_familiaris	1	1	1	1
Medium	A0A5F4D908	cGMP-specific 3',5'-cyclic phosphodiesterase OS=Canis lupus familiaris OX=9615 GN=PDE5A PE=4 SV=1	C_familiaris	1	1	1	1
Medium	A0A5F4BU90	Microtubule affinity regulating kinase 3 OS=Canis lupus familiaris OX=9615 GN=MARK3 PE=4 SV=1	C_familiaris	1	1	1	1
Medium	E2RI78	Cell division cycle 20B OS=Canis lupus familiaris OX=9615 GN=CDC20B PE=4 SV=3	C_familiaris	1	1	1	1
Medium	E2RCP4	SCAN box domain-containing protein OS=Canis lupus familiaris OX=9615 PE=4 SV=3	C_familiaris	1	1	1	1
Medium	Q863Z4	Myotrophin OS=Canis lupus familiaris OX=9615 GN=MTPN PE=3 SV=3	C_familiaris	1	1	1	1
Medium	F1Q138	Zinc finger protein 500 OS=Canis lupus familiaris OX=9615 GN=ZNF500 PE=4 SV=3	C_familiaris	1	1	1	1
Medium	A0A5F4DGY6	FAT atypical cadherin 1 OS=Canis lupus familiaris OX=9615 GN=FAT1 PE=4 SV=1	C_familiaris	1	1	1	1
Medium	A0A5F4C3A3	Gamma-aminobutyric acid type B receptor subunit 1 OS=Canis lupus familiaris OX=9615 GN=GABBR1 PE=4 SV=1	C_familiaris	1	1	1	1
Medium	A0A5F4BUL0	O-linked N-acetylglucosamine (GlcNAc) transferase OS=Canis lupus familiaris OX=9615 GN=OGT PE=4 SV=1	C_familiaris	1	1	1	1
Medium	F6X4J2	Importin 7 OS=Canis lupus familiaris OX=9615 GN=IPO7 PE=4 SV=1	C_familiaris	1	1	1	1
Medium	A0A5F4C9B5	Plexin A1 OS=Canis lupus familiaris OX=9615 GN=PLXNA1 PE=4 SV=1	C_familiaris	1	1	1	1
Medium	F1PS94	Notch receptor 2 OS=Canis lupus familiaris OX=9615 GN=NOTCH2 PE=4 SV=3	C_familiaris	1	1	1	1
Medium	F1PGX1	Desmoglein-3 OS=Canis lupus familiaris OX=9615 GN=DSG2 PE=4 SV=2	C_familiaris	1	1	1	1
Medium	F1PCJ7	Polypyrimidine tract binding protein 1 OS=Canis lupus familiaris OX=9615 GN=PTBP1 PE=4 SV=2	C_familiaris	1	1	1	1
Medium	H9GWI1	ADAM_spacer1 domain-containing protein OS=Canis lupus familiaris OX=9615 PE=4 SV=3	C_familiaris	1	1	1	1
Medium	J9NZJ6	Phosphatidylinositol binding clathrin assembly protein OS=Canis lupus familiaris OX=9615 GN=PICALM PE=4 SV=1	C_familiaris	1	1	1	1
Medium	A0A5F4C2E2	Cullin 5 OS=Canis lupus familiaris OX=9615 GN=CUL5 PE=4 SV=1	C_familiaris	1	1	1	1
Medium	F1PFI5	Translin OS=Canis lupus familiaris OX=9615 GN=TSN PE=4 SV=3	C_familiaris	1	1	1	1
Medium	F1PHU7	Nuclear receptor subfamily 5 group A member 1 OS=Canis lupus familiaris OX=9615 GN=NR5A1 PE=3 SV=3	C_familiaris	1	1	1	1
Medium	A0A5F4D2B4	Cytochrome P450 family 4 subfamily B member 1 OS=Canis lupus familiaris OX=9615 GN=CYP4B1 PE=4 SV=1	C_familiaris	1	1	1	1
Medium	E2QTQ8	Pyr_redox_2 domain-containing protein OS=Canis lupus familiaris OX=9615 GN=SQOR PE=4 SV=1	C_familiaris	1	1	1	1
Medium	A0A5F4DA88	Tissue specific transplantation antigen P35B OS=Canis lupus familiaris OX=9615 GN=TSTA3 PE=4 SV=1	C_familiaris	1	1	1	1
Medium	A0A5F4CTH0	Dedicator of cytokinesis 11 OS=Canis lupus familiaris OX=9615 GN=DOCK11 PE=4 SV=1	C_familiaris	1	1	1	1
Medium	A0A5F4CSN7	Ras homolog family member F, filopodia associated OS=Canis lupus familiaris OX=9615 GN=RHOF PE=4 SV=1	C_familiaris	1	1	1	1
Medium	E2RTH0	Chemokine (C-X3-C motif) ligand 1 OS=Canis lupus familiaris OX=9615 GN=CX3CL1 PE=2 SV=3	C_familiaris	1	1	1	1
Medium	E2QX82	Protocadherin 12 OS=Canis lupus familiaris OX=9615 GN=PCDH12 PE=4 SV=2	C_familiaris	1	1	1	1
Medium	A0A5F4DDG5	TBC1 domain family member 4 OS=Canis lupus familiaris OX=9615 GN=TBC1D4 PE=4 SV=1	C_familiaris	1	1	1	1
Medium	A0A5F4CXM3	TAO kinase 3 OS=Canis lupus familiaris OX=9615 GN=TAOK3 PE=4 SV=1	C_familiaris	1	1	1	1
Medium	A0A5F4C6X9	Importin 11 OS=Canis lupus familiaris OX=9615 GN=IPO11 PE=4 SV=1	C_familiaris	1	1	1	1
Medium	A0A5F4BWM0	Epoxide hydrolase 2 OS=Canis lupus familiaris OX=9615 GN=EPHX2 PE=4 SV=1	C_familiaris	1	1	1	1
Low	F1PV45	Titin OS=Canis lupus familiaris OX=9615 GN=TTN PE=4 SV=3	C_familiaris	1	1	1	1
Low	F1P890	NEDD8 ubiquitin like modifier OS=Canis lupus familiaris OX=9615 GN=NEDD8 PE=4 SV=3	C_familiaris	1	1	1	1
Low	F1PVF1	Uncharacterized protein OS=Canis lupus familiaris OX=9615 PE=3 SV=2	C_familiaris	1	1	1	1
Low	J9NVS3	High mobility group box 3 OS=Canis lupus familiaris OX=9615 GN=HMGB3 PE=4 SV=2	C_familiaris	1	1	1	1
Low	J9NUN4	WD repeat domain 90 OS=Canis lupus familiaris OX=9615 GN=WDR90 PE=4 SV=2	C_familiaris	1	1	1	1
Low	F1P7M0	Aminopeptidase OS=Canis lupus familiaris OX=9615 GN=NPEPPS PE=3 SV=2	C_familiaris	1	1	1	1
Low	A0A5F4CEI8	Uncharacterized protein OS=Canis lupus familiaris OX=9615 PE=4 SV=1	C_familiaris	1	1	1	1
Low	J9JHY9	Nucleoporin 153 OS=Canis lupus familiaris OX=9615 GN=NUP153 PE=4 SV=2	C_familiaris	1	1	1	1
Low	A0A5F4D1T2	Sarcoglycan epsilon OS=Canis lupus familiaris OX=9615 GN=SGCE PE=4 SV=1	C_familiaris	1	1	1	1
Low	E2QU50	Fibrinogen C domain containing 1 OS=Canis lupus familiaris OX=9615 GN=FIBCD1 PE=4 SV=2	C_familiaris	1	1	1	1
Low	J9NSY4	C1q and TNF related 5 OS=Canis lupus familiaris OX=9615 GN=C1QTNF5 PE=4 SV=2	C_familiaris	1	1	1	1
Low	A0A5F4BV62	Centrosomal protein 85 like OS=Canis lupus familiaris OX=9615 GN=CEP85L PE=4 SV=1	C_familiaris	1	1	1	1
Low	F1PKI0	Nop domain-containing protein OS=Canis lupus familiaris OX=9615 GN=PRPF31 PE=4 SV=2	C_familiaris	1	1	1	1
Low	F1Q2F7	Collagen type VI alpha 5 chain OS=Canis lupus familiaris OX=9615 GN=COL6A5 PE=4 SV=3	C_familiaris	1	1	1	1
Low	A0A5F4D5G0	Bet1 golgi vesicular membrane trafficking protein OS=Canis lupus familiaris OX=9615 GN=BET1 PE=4 SV=1	C_familiaris	1	1	1	1
Low	A0A5F4DCN3	Plexin B3 OS=Canis lupus familiaris OX=9615 GN=PLXNB3 PE=4 SV=1	C_familiaris	1	1	1	1
Low	A0A5F4BRR2	MYC binding protein 2 OS=Canis lupus familiaris OX=9615 GN=MYCBP2 PE=4 SV=1	C_familiaris	1	1	1	1
Low	F1PR26	Prostaglandin F2 receptor inhibitor OS=Canis lupus familiaris OX=9615 GN=PTGFRN PE=4 SV=3	C_familiaris	1	1	1	1
Low	E2QYD2	Electron transfer flavoprotein subunit beta OS=Canis lupus familiaris OX=9615 GN=ETFB PE=4 SV=2	C_familiaris	1	1	1	1
Low	A0A5F4DB97	Selectin L OS=Canis lupus familiaris OX=9615 GN=SELL PE=4 SV=1	C_familiaris	1	1	1	1
Low	A0A5F4BP18	Uncharacterized protein OS=Canis lupus familiaris OX=9615 GN=ARHGAP18 PE=4 SV=1	C_familiaris	1	1	1	1
Low	J9NT12	Fibrinogen like 1 OS=Canis lupus familiaris OX=9615 GN=FGL1 PE=4 SV=2	C_familiaris	1	1	1	1
Low	A0A5F4C144	Mitogen-activated protein kinase 8 OS=Canis lupus familiaris OX=9615 GN=MAPK8 PE=4 SV=1	C_familiaris	1	1	1	1
Low	E2RT42	Ribosomal RNA processing 7 homolog OS=Canis lupus familiaris OX=9615 GN=RRP7 PE=4 SV=1	C_familiaris	1	1	1	1
Low	A0A5F4CGP1	Defective in cullin neddylation 1 domain containing 1 OS=Canis lupus familiaris OX=9615 GN=DCUN1D1 PE=4 SV=1	C_familiaris	1	1	1	1
Low	J9P5B7	NADH:ubiquinone oxidoreductase complex assembly factor 4 OS=Canis lupus familiaris OX=9615 GN=NDUFAF4 PE=4 SV=2	C_familiaris	1	1	1	1
Low	E2RHB4	Cholinergic receptor nicotinic beta 4 subunit OS=Canis lupus familiaris OX=9615 GN=CHRNB4 PE=3 SV=3	C_familiaris	1	1	1	1
Low	E2QZY0	Netrin 4 OS=Canis lupus familiaris OX=9615 GN=NTN4 PE=4 SV=2	C_familiaris	1	1	1	1
Low	E2RP68	S_100 domain-containing protein OS=Canis lupus familiaris OX=9615 GN=S100A5 PE=4 SV=2	C_familiaris	1	1	1	1
Low	F6XGB4	Growth regulating estrogen receptor binding 1 OS=Canis lupus familiaris OX=9615 GN=GREB1 PE=4 SV=2	C_familiaris	1	1	1	1
Low	A0A5F4DB23	ATPase phospholipid transporting 11C OS=Canis lupus familiaris OX=9615 GN=ATP11C PE=4 SV=1	C_familiaris	1	1	1	1
Low	F1PKL4	Signal peptide peptidase like 2A OS=Canis lupus familiaris OX=9615 GN=SPPL2A PE=4 SV=3	C_familiaris	1	1	1	1
Low	F1PXM4	Taste receptor type 1 member 3 OS=Canis lupus familiaris OX=9615 GN=TAS1R3 PE=3 SV=3	C_familiaris	1	1	1	1
Low	J9P499	STE20 like kinase OS=Canis lupus familiaris OX=9615 GN=SLK PE=4 SV=1	C_familiaris	1	1	1	1
Low	A0A5F4CMZ1	Uncharacterized protein OS=Canis lupus familiaris OX=9615 PE=4 SV=1	C_familiaris	1	1	1	1
Low	A0A5F4D391	Carboxypeptidase Q OS=Canis lupus familiaris OX=9615 GN=CPQ PE=4 SV=1	C_familiaris	1	1	1	1
Low	A0A5F4D1S9	Uncharacterized protein OS=Canis lupus familiaris OX=9615 PE=4 SV=1	C_familiaris	1	1	1	1
High	A0A5F4CDQ5	Uncharacterized protein OS=Canis lupus familiaris OX=9615 PE=4 SV=1	C_familiaris	7	17	1000	0
High	E2R7W6	IF rod domain-containing protein OS=Canis lupus familiaris OX=9615 GN=KRT42 PE=3 SV=2	C_familiaris	12	15	280	0
High	J9P4H9	IF rod domain-containing protein OS=Canis lupus familiaris OX=9615 GN=KRT14 PE=3 SV=2	C_familiaris	9	15	253	0
High	A0A5F4DC86	Actinin alpha 4 OS=Canis lupus familiaris OX=9615 GN=ACTN4 PE=4 SV=1	C_familiaris	24	30	207	0
High	A0A5F4C146	Actinin alpha 4 OS=Canis lupus familiaris OX=9615 GN=ACTN4 PE=4 SV=1	C_familiaris	17	20	151	0
High	E2QUQ0	Actinin alpha 2 OS=Canis lupus familiaris OX=9615 GN=ACTN2 PE=4 SV=2	C_familiaris	12	14	86	0
High	E2QWM4	Spectrin beta, non-erythrocytic 4 OS=Canis lupus familiaris OX=9615 GN=SPTBN4 PE=4 SV=2	C_familiaris	2	3	35	0

## Sheet: Merge CanL
Protein FDR Confidence	Accession	Description	Marked as	Peptides	Isoforms	PSMs	Unique Peptides
High	F1P8Z5	Apolipoprotein B OS=Canis lupus familiaris OX=9615 GN=APOB PE=4 SV=2	C_familiaris	234	413	11406	229
High	A0A5F4CG91	von Willebrand factor OS=Canis lupus familiaris OX=9615 GN=VWF PE=4 SV=1	C_familiaris	115	283	8032	115
High	F1PWW0	Filamin A OS=Canis lupus familiaris OX=9615 GN=FLNA PE=4 SV=3	C_familiaris	118	159	2710	106
High	F1PSC2	Talin 1 OS=Canis lupus familiaris OX=9615 GN=TLN1 PE=4 SV=3	C_familiaris	106	134	1432	106
High	A0A5F4CWM9	Myosin-9 OS=Canis lupus familiaris OX=9615 GN=MYH9 PE=4 SV=1	C_familiaris	90	126	1139	90
High	F1PGM1	Complement C3 OS=Canis lupus familiaris OX=9615 GN=C3 PE=4 SV=2	C_familiaris	88	199	7186	80
High	F1PBL4	Fibrinogen alpha chain OS=Canis lupus familiaris OX=9615 GN=FGA PE=4 SV=2	C_familiaris	83	151	16081	77
High	F6UME0	Uncharacterized protein OS=Canis lupus familiaris OX=9615 GN=LOC477699 PE=4 SV=1	C_familiaris	76	166	8319	76
High	J9PBN6	Uncharacterized protein OS=Canis lupus familiaris OX=9615 GN=LOC477699 PE=4 SV=1	C_familiaris	75	150	7328	75
High	E2R1P6	Spectrin alpha, erythrocytic 1 OS=Canis lupus familiaris OX=9615 GN=SPTA1 PE=4 SV=3	C_familiaris	67	71	726	67
High	J9PAD1	Uncharacterized protein OS=Canis lupus familiaris OX=9615 PE=4 SV=2	C_familiaris	67	98	2438	62
High	F1PEU6	Hemicentin 2 OS=Canis lupus familiaris OX=9615 GN=HMCN2 PE=4 SV=3	C_familiaris	62	70	368	62
High	E2RK21	Uncharacterized protein OS=Canis lupus familiaris OX=9615 GN=CFH PE=4 SV=3	C_familiaris	57	145	3807	57
High	F1PBI6	Thrombospondin 1 OS=Canis lupus familiaris OX=9615 GN=THBS1 PE=4 SV=3	C_familiaris	50	113	1449	50
High	A0A5F4DKI9	Coagulation factor VIII OS=Canis lupus familiaris OX=9615 GN=F8 PE=4 SV=1	C_familiaris	50	55	232	50
High	F1P7J4	Complement C5 OS=Canis lupus familiaris OX=9615 GN=C5 PE=4 SV=3	C_familiaris	51	74	1077	49
High	J9P430	Transferrin OS=Canis lupus familiaris OX=9615 GN=TF PE=3 SV=1	C_familiaris	51	78	2389	48
High	A0A5F4BYK6	Tenascin C OS=Canis lupus familiaris OX=9615 GN=TNC PE=4 SV=1	C_familiaris	47	70	524	47
High	F1PN98	Coagulation factor V OS=Canis lupus familiaris OX=9615 GN=F5 PE=3 SV=2	C_familiaris	47	63	742	47
High	F1Q253	Spectrin beta chain OS=Canis lupus familiaris OX=9615 GN=SPTB PE=3 SV=3	C_familiaris	48	62	432	47
High	F1PKR3	Vinculin OS=Canis lupus familiaris OX=9615 GN=VCL PE=4 SV=3	C_familiaris	46	56	538	46
High	F1PGS2	Fibrinogen beta chain OS=Canis lupus familiaris OX=9615 GN=FGB PE=4 SV=2	C_familiaris	52	165	22734	45
High	A0A5F4BSV4	Uncharacterized protein OS=Canis lupus familiaris OX=9615 GN=FBN1 PE=4 SV=1	C_familiaris	45	56	367	45
High	F1P8G0	Fibrinogen gamma chain OS=Canis lupus familiaris OX=9615 GN=FGG PE=4 SV=2	C_familiaris	44	149	14464	43
High	A0A5F4CJL8	Sushi, von Willebrand factor type A, EGF and pentraxin domain containing 1 OS=Canis lupus familiaris OX=9615 GN=SVEP1 PE=4 SV=1	C_familiaris	42	52	310	42
High	F1PR31	Collagen type VI alpha 3 chain OS=Canis lupus familiaris OX=9615 GN=COL6A3 PE=4 SV=3	C_familiaris	41	45	209	41
High	A0A5F4D0A9	Uncharacterized protein OS=Canis lupus familiaris OX=9615 GN=LOC484960 PE=4 SV=1	C_familiaris	39	42	356	39
High	H9GWY3	Inter-alpha-trypsin inhibitor heavy chain 4 OS=Canis lupus familiaris OX=9615 GN=ITIH4 PE=4 SV=3	C_familiaris	38	61	772	38
High	J9NZL6	Reelin OS=Canis lupus familiaris OX=9615 GN=RELN PE=4 SV=2	C_familiaris	38	49	466	38
High	F1Q421	Plasminogen OS=Canis lupus familiaris OX=9615 GN=PLG PE=3 SV=2	C_familiaris	40	66	1105	36
High	P18649	Apolipoprotein E OS=Canis lupus familiaris OX=9615 GN=APOE PE=1 SV=3	C_familiaris	33	78	5197	33
High	J9NVC6	Immunoglobulin heavy constant mu OS=Canis lupus familiaris OX=9615 GN=IGHM PE=4 SV=2	C_familiaris	33	74	14628	32
High	F1P903	Complement C1r OS=Canis lupus familiaris OX=9615 GN=C1R PE=3 SV=2	C_familiaris	32	61	1746	32
High	E2RLQ9	Valosin containing protein OS=Canis lupus familiaris OX=9615 GN=VCP PE=3 SV=3	C_familiaris	32	38	314	32
High	A0A5F4BZM5	Ceruloplasmin OS=Canis lupus familiaris OX=9615 GN=CP PE=4 SV=1	C_familiaris	31	47	560	31
High	A0A5F4CNZ1	Complement C6 OS=Canis lupus familiaris OX=9615 GN=C6 PE=4 SV=1	C_familiaris	30	39	324	30
High	F1PAQ3	Maltase-glucoamylase OS=Canis lupus familiaris OX=9615 GN=MGAM PE=4 SV=3	C_familiaris	32	38	290	30
High	F1PSS8	Protein S OS=Canis lupus familiaris OX=9615 GN=PROS1 PE=4 SV=3	C_familiaris	33	54	2035	29
High	F1PDJ5	Apolipoprotein A-I OS=Canis lupus familiaris OX=9615 GN=APOA1 PE=3 SV=1	C_familiaris	30	35	2424	29
High	E2QY07	Actinin alpha 1 OS=Canis lupus familiaris OX=9615 GN=ACTN1 PE=4 SV=1	C_familiaris	41	56	574	28
High	F1PG16	Uncharacterized protein OS=Canis lupus familiaris OX=9615 GN=CD5L PE=4 SV=2	C_familiaris	28	66	7633	27
High	A0A5F4BS96	Complement C1s OS=Canis lupus familiaris OX=9615 GN=C1S PE=4 SV=1	C_familiaris	28	59	1256	27
High	E2QWN7	Lymphocyte cytosolic protein 1 OS=Canis lupus familiaris OX=9615 GN=LCP1 PE=4 SV=2	C_familiaris	29	43	326	27
High	F6Y6T8	Uncharacterized protein OS=Canis lupus familiaris OX=9615 GN=PIGR PE=4 SV=2	C_familiaris	26	54	1389	26
High	F1PRD8	Ankyrin 1 OS=Canis lupus familiaris OX=9615 GN=ANK1 PE=4 SV=3	C_familiaris	26	28	167	26
High	J9P416	Tenascin N OS=Canis lupus familiaris OX=9615 GN=TNN PE=4 SV=1	C_familiaris	26	29	105	26
High	A0A5F4DGY6	FAT atypical cadherin 1 OS=Canis lupus familiaris OX=9615 GN=FAT1 PE=4 SV=1	C_familiaris	26	26	62	26
High	F1PPG5	Integrin beta OS=Canis lupus familiaris OX=9615 GN=ITGB3 PE=3 SV=2	C_familiaris	25	37	690	25
High	E2RE76	Apolipoprotein A-IV OS=Canis lupus familiaris OX=9615 GN=APOA4 PE=3 SV=2	C_familiaris	28	33	995	25
High	E2RL88	Integrin subunit alpha 6 OS=Canis lupus familiaris OX=9615 GN=ITGA6 PE=3 SV=2	C_familiaris	25	26	292	25
High	A0A5F4CNE2	Cartilage oligomeric matrix protein OS=Canis lupus familiaris OX=9615 GN=COMP PE=4 SV=1	C_familiaris	27	57	688	24
High	F1PKX3	Coagulation factor XIII A chain OS=Canis lupus familiaris OX=9615 GN=F13A1 PE=4 SV=2	C_familiaris	25	31	425	24
High	P19006	Haptoglobin OS=Canis lupus familiaris OX=9615 GN=HP PE=1 SV=2	C_familiaris	23	40	2019	23
High	A0A5F4CIK5	Coagulation factor XIII B chain OS=Canis lupus familiaris OX=9615 GN=F13B PE=4 SV=1	C_familiaris	23	32	474	23
High	J9NSF9	Prothrombin OS=Canis lupus familiaris OX=9615 GN=F2 PE=3 SV=2	C_familiaris	23	25	379	23
High	A0A5F4CHN8	Thrombospondin 4 OS=Canis lupus familiaris OX=9615 GN=THBS4 PE=4 SV=1	C_familiaris	26	39	642	22
High	F1PG39	Inter-alpha-trypsin inhibitor heavy chain 2 OS=Canis lupus familiaris OX=9615 GN=ITIH2 PE=4 SV=3	C_familiaris	22	46	635	22
High	F1PR54	Uncharacterized protein OS=Canis lupus familiaris OX=9615 GN=LTF PE=3 SV=1	C_familiaris	23	32	219	22
High	A0A5F4BY85	Glycosylphosphatidylinositol specific phospholipase D1 OS=Canis lupus familiaris OX=9615 GN=GPLD1 PE=4 SV=1	C_familiaris	22	26	353	22
High	E2R5W6	GC vitamin D binding protein OS=Canis lupus familiaris OX=9615 GN=GC PE=4 SV=3	C_familiaris	21	30	570	21
High	F1PRU9	Integrin subunit alpha 2b OS=Canis lupus familiaris OX=9615 GN=ITGA2B PE=3 SV=2	C_familiaris	21	26	380	21
High	F1PXD6	Proteoglycan 4 OS=Canis lupus familiaris OX=9615 GN=PRG4 PE=4 SV=3	C_familiaris	21	35	750	21
High	E2QZQ1	Transferrin OS=Canis lupus familiaris OX=9615 GN=TF PE=3 SV=2	C_familiaris	22	28	248	21
High	F1PGD4	Neural EGFL like 2 OS=Canis lupus familiaris OX=9615 GN=NELL2 PE=4 SV=3	C_familiaris	21	32	98	21
High	E2RG01	Complement C7 OS=Canis lupus familiaris OX=9615 GN=C7 PE=4 SV=3	C_familiaris	26	35	212	20
High	A0A5F4BXN3	Gelsolin OS=Canis lupus familiaris OX=9615 GN=GSN PE=4 SV=1	C_familiaris	20	26	552	20
High	Q2Z1P8	Anion exchange protein OS=Canis lupus familiaris OX=9615 GN=SLC4A1 PE=2 SV=1	C_familiaris	20	27	493	20
High	E2RFV9	Complement C9 OS=Canis lupus familiaris OX=9615 GN=C9 PE=4 SV=3	C_familiaris	19	33	300	19
High	J9P4J8	Complement factor H related 5 OS=Canis lupus familiaris OX=9615 GN=CFHR5 PE=4 SV=2	C_familiaris	19	42	205	19
High	E2RES2	Serpin family C member 1 OS=Canis lupus familiaris OX=9615 GN=SERPINC1 PE=3 SV=3	C_familiaris	19	30	287	19
High	E2QZ50	Adenylyl cyclase-associated protein OS=Canis lupus familiaris OX=9615 GN=CAP1 PE=3 SV=1	C_familiaris	19	23	220	19
High	E2R109	Complement C8 alpha chain OS=Canis lupus familiaris OX=9615 GN=C8A PE=4 SV=1	C_familiaris	19	32	204	19
High	F1Q432	Tenascin XB OS=Canis lupus familiaris OX=9615 GN=TNXB PE=4 SV=3	C_familiaris	19	24	101	19
High	F1PGM9	Complement component 4 binding protein alpha OS=Canis lupus familiaris OX=9615 GN=C4BPA PE=4 SV=3	C_familiaris	43	91	13230	18
High	A0A5F4CWL0	Uncharacterized protein OS=Canis lupus familiaris OX=9615 GN=CANT1 PE=4 SV=1	C_familiaris	18	26	590	18
High	F1Q418	Inter-alpha-trypsin inhibitor heavy chain 1 OS=Canis lupus familiaris OX=9615 GN=ITIH1 PE=4 SV=2	C_familiaris	18	32	664	18
High	E2R0T6	Heat shock protein family A (Hsp70) member 8 OS=Canis lupus familiaris OX=9615 GN=HSPA8 PE=3 SV=1	C_familiaris	21	29	445	18
High	E2RS75	Uncharacterized protein OS=Canis lupus familiaris OX=9615 GN=CFB PE=3 SV=2	C_familiaris	18	20	281	18
High	F1PEN6	Transferrin receptor protein 1 OS=Canis lupus familiaris OX=9615 GN=TFRC PE=4 SV=2	C_familiaris	18	25	277	18
High	E2RK64	Fermitin family member 3 OS=Canis lupus familiaris OX=9615 GN=FERMT3 PE=4 SV=2	C_familiaris	18	23	254	18
High	F1PB77	Alpha-1,4 glucan phosphorylase OS=Canis lupus familiaris OX=9615 GN=PYGL PE=3 SV=2	C_familiaris	18	23	101	18
High	E2QZ98	Angiopoietin like 3 OS=Canis lupus familiaris OX=9615 GN=ANGPTL3 PE=4 SV=1	C_familiaris	18	21	110	18
High	F1PBJ3	Uncharacterized protein OS=Canis lupus familiaris OX=9615 GN=LMNA PE=3 SV=2	C_familiaris	19	19	75	18
High	P25473	Clusterin OS=Canis lupus familiaris OX=9615 GN=CLU PE=2 SV=1	C_familiaris	17	31	852	17
High	J9P7F7	Ficolin 1 OS=Canis lupus familiaris OX=9615 GN=FCN1 PE=4 SV=1	C_familiaris	17	31	1328	17
High	A0A5F4D3V5	Tubulin beta 1 class VI OS=Canis lupus familiaris OX=9615 GN=TUBB1 PE=4 SV=1	C_familiaris	21	29	374	17
High	E2R141	Complement C8 beta chain OS=Canis lupus familiaris OX=9615 GN=C8B PE=4 SV=1	C_familiaris	17	24	174	17
High	E2R7A3	Complement factor I OS=Canis lupus familiaris OX=9615 GN=CFI PE=3 SV=3	C_familiaris	18	36	430	17
High	A0A5F4BNS1	Filamin C OS=Canis lupus familiaris OX=9615 GN=FLNC PE=4 SV=1	C_familiaris	29	31	193	17
High	A0A5F4CTD0	Alpha-1-B glycoprotein OS=Canis lupus familiaris OX=9615 GN=A1BG PE=4 SV=1	C_familiaris	17	26	267	17
High	A0A5F4BUZ8	Transketolase OS=Canis lupus familiaris OX=9615 GN=TKT PE=4 SV=1	C_familiaris	17	18	158	17
High	A0A5F4DA08	Oncoprotein induced transcript 3 OS=Canis lupus familiaris OX=9615 GN=OIT3 PE=4 SV=1	C_familiaris	17	26	229	17
High	E2RQF8	Extracellular matrix protein 1 OS=Canis lupus familiaris OX=9615 GN=ECM1 PE=4 SV=3	C_familiaris	17	23	154	17
High	A0A5F4DBL7	LDL receptor related protein 1 OS=Canis lupus familiaris OX=9615 GN=LRP1 PE=4 SV=1	C_familiaris	17	20	55	17
High	J9NX00	Thyroglobulin OS=Canis lupus familiaris OX=9615 GN=TG PE=4 SV=2	C_familiaris	17	18	34	17
High	E2QZN8	Pentraxin 3 OS=Canis lupus familiaris OX=9615 GN=PTX3 PE=4 SV=2	C_familiaris	16	20	254	16
High	F1PIC7	Heat shock protein family A (Hsp70) member 5 OS=Canis lupus familiaris OX=9615 GN=HSPA5 PE=3 SV=2	C_familiaris	19	24	313	16
High	E2QZ19	Serum albumin OS=Canis lupus familiaris OX=9615 GN=AFP PE=4 SV=2	C_familiaris	16	17	185	16
High	A0A5F4CZM1	Quiescin sulfhydryl oxidase 1 OS=Canis lupus familiaris OX=9615 GN=QSOX1 PE=4 SV=1	C_familiaris	16	18	202	16
High	F1PKB2	Alpha-mannosidase OS=Canis lupus familiaris OX=9615 GN=MAN2B1 PE=3 SV=2	C_familiaris	16	20	54	16
High	O97492	Catalase OS=Canis lupus familiaris OX=9615 GN=CAT PE=1 SV=3	C_familiaris	16	18	116	16
High	E2RT60	Integrin beta OS=Canis lupus familiaris OX=9615 GN=ITGB1 PE=3 SV=3	C_familiaris	16	17	180	16
High	F1PQ52	Myeloperoxidase OS=Canis lupus familiaris OX=9615 GN=MPO PE=4 SV=3	C_familiaris	16	18	39	16
High	F1PHK9	Laminin subunit gamma 1 OS=Canis lupus familiaris OX=9615 GN=LAMC1 PE=4 SV=2	C_familiaris	16	17	51	16
High	E2RH18	Complement factor properdin OS=Canis lupus familiaris OX=9615 GN=CFP PE=4 SV=1	C_familiaris	15	24	716	15
High	E2RJY0	Potassium channel tetramerization domain containing 12 OS=Canis lupus familiaris OX=9615 GN=KCTD12 PE=4 SV=2	C_familiaris	15	23	655	15
High	A0A5F4CBF2	Tropomyosin 4 OS=Canis lupus familiaris OX=9615 GN=TPM4 PE=4 SV=1	C_familiaris	23	27	288	15
High	Q6QNF4	Hepatocyte growth factor activator OS=Canis lupus familiaris OX=9615 GN=HGFAC PE=2 SV=1	C_familiaris	15	19	235	15
High	F1P9U4	Dihydropyrimidinase like 2 OS=Canis lupus familiaris OX=9615 GN=DPYSL2 PE=4 SV=2	C_familiaris	18	23	120	15
High	F1P7W0	Uncharacterized protein OS=Canis lupus familiaris OX=9615 GN=SELP PE=4 SV=2	C_familiaris	15	24	205	15
High	P54714	Triosephosphate isomerase OS=Canis lupus familiaris OX=9615 GN=TPI1 PE=1 SV=3	C_familiaris	15	17	91	15
High	A0A5F4C080	Caldesmon 1 OS=Canis lupus familiaris OX=9615 GN=CALD1 PE=4 SV=1	C_familiaris	15	19	179	15
High	F1PXF9	Hemicentin 1 OS=Canis lupus familiaris OX=9615 GN=HMCN1 PE=4 SV=2	C_familiaris	15	16	114	15
High	J9P9J6	Uncharacterized protein OS=Canis lupus familiaris OX=9615 PE=4 SV=2	C_familiaris	14	40	4211	14
High	A0A5F4CEP4	Fetuin B OS=Canis lupus familiaris OX=9615 GN=FETUB PE=4 SV=1	C_familiaris	14	18	192	14
High	A0A5F4D4F1	Moesin OS=Canis lupus familiaris OX=9615 GN=MSN PE=4 SV=1	C_familiaris	19	28	151	14
High	F1PUM6	SMB domain-containing protein OS=Canis lupus familiaris OX=9615 GN=VTN PE=4 SV=2	C_familiaris	14	17	309	14
High	F1PXX1	EH domain containing 3 OS=Canis lupus familiaris OX=9615 GN=EHD3 PE=3 SV=2	C_familiaris	16	19	94	14
High	J9P5P9	Apolipoprotein B receptor OS=Canis lupus familiaris OX=9615 GN=APOBR PE=4 SV=1	C_familiaris	14	15	58	14
High	F1P8N6	Endoplasmin OS=Canis lupus familiaris OX=9615 GN=HSP90B1 PE=3 SV=1	C_familiaris	15	15	165	14
High	E2R5H4	Integrin linked kinase OS=Canis lupus familiaris OX=9615 GN=ILK PE=4 SV=1	C_familiaris	14	16	128	14
High	F1P6A2	Matrix metalloproteinase-9 OS=Canis lupus familiaris OX=9615 GN=MMP9 PE=3 SV=3	C_familiaris	14	14	47	14
High	E2RD86	Protein disulfide-isomerase OS=Canis lupus familiaris OX=9615 GN=PDIA3 PE=3 SV=1	C_familiaris	14	15	78	14
High	P33703	Beta-2-glycoprotein 1 OS=Canis lupus familiaris OX=9615 GN=APOH PE=2 SV=1	C_familiaris	13	20	603	13
High	P05124	Creatine kinase B-type OS=Canis lupus familiaris OX=9615 GN=CKB PE=1 SV=1	C_familiaris	14	22	127	13
High	F1PAB0	Uncharacterized protein OS=Canis lupus familiaris OX=9615 GN=LOC489647 PE=4 SV=3	C_familiaris	13	23	498	13
High	E2RGG9	Tryptophanyl-tRNA synthetase OS=Canis lupus familiaris OX=9615 GN=WARS1 PE=3 SV=2	C_familiaris	13	17	119	13
High	E2R4V3	Serpin family F member 2 OS=Canis lupus familiaris OX=9615 GN=SERPINF2 PE=3 SV=1	C_familiaris	13	18	182	13
High	J9PAA4	Carboxypeptidase N subunit 2 OS=Canis lupus familiaris OX=9615 GN=CPN2 PE=4 SV=1	C_familiaris	13	16	260	13
High	A0A5F4CUH8	Golgi membrane protein 1 OS=Canis lupus familiaris OX=9615 GN=GOLM1 PE=4 SV=1	C_familiaris	13	17	190	13
High	F1PS94	Notch receptor 2 OS=Canis lupus familiaris OX=9615 GN=NOTCH2 PE=4 SV=3	C_familiaris	13	19	66	13
High	F1PDC7	Notch receptor 1 OS=Canis lupus familiaris OX=9615 GN=NOTCH1 PE=4 SV=3	C_familiaris	13	23	60	13
High	F1PVW0	L-lactate dehydrogenase OS=Canis lupus familiaris OX=9615 GN=LDHA PE=3 SV=2	C_familiaris	14	16	120	13
High	F1PW10	Transforming growth factor beta induced OS=Canis lupus familiaris OX=9615 GN=TGFBI PE=4 SV=3	C_familiaris	13	14	114	13
High	F6UYJ9	Calreticulin OS=Canis lupus familiaris OX=9615 GN=CALR PE=3 SV=2	C_familiaris	13	13	83	13
High	E2QUY9	ADAM metallopeptidase with thrombospondin type 1 motif 13 OS=Canis lupus familiaris OX=9615 GN=ADAMTS13 PE=4 SV=2	C_familiaris	13	15	70	13
High	F6X4P9	Solute carrier family 38 member 10 OS=Canis lupus familiaris OX=9615 GN=SLC38A10 PE=4 SV=2	C_familiaris	13	14	33	13
High	F1Q094	Platelet-activating factor acetylhydrolase OS=Canis lupus familiaris OX=9615 GN=PLA2G7 PE=4 SV=1	C_familiaris	13	13	101	13
High	J9NUI6	Alpha-1-microglobulin/bikunin precursor OS=Canis lupus familiaris OX=9615 GN=AMBP PE=4 SV=1	C_familiaris	12	26	340	12
High	A0A5F4DDG2	Myristoylated alanine rich protein kinase C substrate OS=Canis lupus familiaris OX=9615 GN=MARCKS PE=4 SV=1	C_familiaris	12	15	510	12
High	J9NX65	Uncharacterized protein OS=Canis lupus familiaris OX=9615 GN=SBSN PE=4 SV=2	C_familiaris	12	13	125	12
High	H9GWG4	Inter-alpha-trypsin inhibitor heavy chain 3 OS=Canis lupus familiaris OX=9615 GN=ITIH3 PE=4 SV=3	C_familiaris	14	22	147	12
High	E2R2F7	Sex hormone binding globulin OS=Canis lupus familiaris OX=9615 GN=SHBG PE=4 SV=1	C_familiaris	12	17	253	12
High	E2RMN2	Proteasome subunit alpha type OS=Canis lupus familiaris OX=9615 GN=PSMA6 PE=3 SV=1	C_familiaris	12	15	193	12
High	E2R3B0	Secretogranin III OS=Canis lupus familiaris OX=9615 GN=SCG3 PE=4 SV=2	C_familiaris	12	14	55	12
High	F1PZC6	Histidine rich glycoprotein OS=Canis lupus familiaris OX=9615 GN=HRG PE=4 SV=3	C_familiaris	12	16	313	12
High	A0A5F4CZY7	Uncharacterized protein OS=Canis lupus familiaris OX=9615 GN=PSMA1 PE=4 SV=1	C_familiaris	12	16	259	12
High	A0A5F4CP02	Uncharacterized protein OS=Canis lupus familiaris OX=9615 GN=PKM PE=4 SV=1	C_familiaris	13	15	169	12
High	A0A5F4DCJ3	WD repeat domain 1 OS=Canis lupus familiaris OX=9615 GN=WDR1 PE=4 SV=1	C_familiaris	12	13	63	12
High	F1P679	Actin related protein 3 OS=Canis lupus familiaris OX=9615 GN=ACTR3 PE=3 SV=2	C_familiaris	12	13	139	12
High	F1PNR5	Coagulation factor XI OS=Canis lupus familiaris OX=9615 GN=F11 PE=3 SV=3	C_familiaris	14	16	127	12
High	A0A5F4CTQ3	LRR binding FLII interacting protein 1 OS=Canis lupus familiaris OX=9615 GN=LRRFIP1 PE=4 SV=1	C_familiaris	13	16	67	12
High	F1P8B4	Calnexin OS=Canis lupus familiaris OX=9615 GN=CANX PE=3 SV=2	C_familiaris	12	12	53	12
High	J9P1G2	Adiponectin A OS=Canis lupus familiaris OX=9615 GN=C1QB PE=4 SV=1	C_familiaris	11	27	1701	11
High	E2R8K8	Uncharacterized protein OS=Canis lupus familiaris OX=9615 GN=LOC490399 PE=4 SV=3	C_familiaris	12	16	353	11
High	F1PF02	Proteasome subunit beta OS=Canis lupus familiaris OX=9615 GN=PSMB1 PE=3 SV=3	C_familiaris	11	12	151	11
High	J9JHH5	Joining chain of multimeric IgA and IgM OS=Canis lupus familiaris OX=9615 GN=JCHAIN PE=4 SV=1	C_familiaris	11	19	1182	11
High	F1PYX9	Serpin family G member 1 OS=Canis lupus familiaris OX=9615 GN=SERPING1 PE=3 SV=3	C_familiaris	11	12	195	11
High	F1PZR4	Hemopexin OS=Canis lupus familiaris OX=9615 GN=APBB1 PE=3 SV=3	C_familiaris	11	13	262	11
High	F1P8T1	Angiopoietin like 6 OS=Canis lupus familiaris OX=9615 GN=ANGPTL6 PE=4 SV=3	C_familiaris	11	13	163	11
High	J9P2K0	Fibulin 2 OS=Canis lupus familiaris OX=9615 GN=FBLN2 PE=4 SV=1	C_familiaris	11	12	44	11
High	F1Q057	Peroxidasin OS=Canis lupus familiaris OX=9615 GN=PXDN PE=4 SV=3	C_familiaris	11	12	35	11
High	A0A5F4C819	Leukotriene A4 hydrolase OS=Canis lupus familiaris OX=9615 GN=LTA4H PE=4 SV=1	C_familiaris	11	11	56	11
High	F1PHD0	Carboxyl ester lipase OS=Canis lupus familiaris OX=9615 GN=CEL PE=3 SV=2	C_familiaris	11	11	71	11
High	E2RS79	Complement C2 OS=Canis lupus familiaris OX=9615 GN=C2 PE=3 SV=2	C_familiaris	11	12	32	11
High	E2RPW3	Paraoxonase 3 OS=Canis lupus familiaris OX=9615 GN=PON3 PE=4 SV=3	C_familiaris	10	19	291	10
High	A0A5F4CWA9	Proteasome subunit alpha 2 OS=Canis lupus familiaris OX=9615 GN=PSMA2 PE=4 SV=1	C_familiaris	10	11	138	10
High	J9PBI1	LIM and senescent cell antigen-like-containing domain protein OS=Canis lupus familiaris OX=9615 GN=LIMS1 PE=4 SV=2	C_familiaris	10	10	86	10
High	A0A5F4CED7	Retinol binding protein 4 OS=Canis lupus familiaris OX=9615 GN=RBP4 PE=4 SV=1	C_familiaris	10	12	82	10
High	E2QSZ5	Coronin OS=Canis lupus familiaris OX=9615 GN=CORO1A PE=3 SV=1	C_familiaris	10	10	131	10
High	O97555	Rab GDP dissociation inhibitor alpha OS=Canis lupus familiaris OX=9615 GN=GDI1 PE=2 SV=1	C_familiaris	10	10	65	10
High	A0A5F4D3V6	Integrin subunit beta 2 OS=Canis lupus familiaris OX=9615 GN=ITGB2 PE=4 SV=1	C_familiaris	10	11	48	10
High	F1PNS6	Peptidase D OS=Canis lupus familiaris OX=9615 GN=PEPD PE=3 SV=3	C_familiaris	10	10	38	10
High	F1PQS3	F-actin-capping protein subunit beta OS=Canis lupus familiaris OX=9615 GN=CAPZB PE=3 SV=2	C_familiaris	10	11	76	10
High	E2RSE5	Dihydropyrimidinase OS=Canis lupus familiaris OX=9615 GN=DPYS PE=4 SV=3	C_familiaris	10	10	39	10
High	A0A5F4BYG4	Spectrin alpha, non-erythrocytic 1 OS=Canis lupus familiaris OX=9615 GN=SPTAN1 PE=4 SV=1	C_familiaris	10	10	33	10
High	F1PQ85	Mannan binding lectin serine peptidase 1 OS=Canis lupus familiaris OX=9615 GN=MASP1 PE=3 SV=3	C_familiaris	25	31	704	9
High	F1PFM6	Collagen type VI alpha 1 chain OS=Canis lupus familiaris OX=9615 GN=COL6A1 PE=4 SV=2	C_familiaris	17	20	210	9
High	E2RNG3	Carboxypeptidase N subunit 1 OS=Canis lupus familiaris OX=9615 GN=CPN1 PE=4 SV=2	C_familiaris	9	15	176	9
High	F1PP29	Uncharacterized protein OS=Canis lupus familiaris OX=9615 PE=4 SV=2	C_familiaris	9	10	163	9
High	E2QW60	Lectin, mannose binding 1 OS=Canis lupus familiaris OX=9615 GN=LMAN1 PE=4 SV=2	C_familiaris	9	20	82	9
High	E2R2K4	RAP1B, member of RAS oncogene family OS=Canis lupus familiaris OX=9615 GN=RAP1B PE=4 SV=1	C_familiaris	9	14	161	9
High	A0A5F4C8G1	Ras suppressor protein 1 OS=Canis lupus familiaris OX=9615 GN=RSU1 PE=4 SV=1	C_familiaris	9	18	118	9
High	Q5W416	Proteasome subunit beta type-8 OS=Canis lupus familiaris OX=9615 GN=PSMB8 PE=1 SV=1	C_familiaris	9	14	114	9
High	F1Q2D2	Glutathione synthetase OS=Canis lupus familiaris OX=9615 GN=GSS PE=3 SV=1	C_familiaris	9	11	33	9
High	A0A5F4BTV9	Aldolase, fructose-bisphosphate B OS=Canis lupus familiaris OX=9615 GN=ALDOB PE=4 SV=1	C_familiaris	10	14	75	9
High	F1PQN5	Cofilin 1 OS=Canis lupus familiaris OX=9615 GN=CFL1 PE=3 SV=3	C_familiaris	9	9	170	9
High	F1PHQ0	Clathrin heavy chain OS=Canis lupus familiaris OX=9615 GN=CLTC PE=3 SV=3	C_familiaris	9	9	49	9
High	F1PBN7	ADAMTS like 2 OS=Canis lupus familiaris OX=9615 GN=ADAMTSL2 PE=4 SV=2	C_familiaris	9	10	64	9
High	J9NT12	Fibrinogen like 1 OS=Canis lupus familiaris OX=9615 GN=FGL1 PE=4 SV=2	C_familiaris	9	12	67	9
High	F1PZA0	Delta-aminolevulinic acid dehydratase OS=Canis lupus familiaris OX=9615 GN=ALAD PE=3 SV=2	C_familiaris	9	10	39	9
High	A0A5F4DGJ6	Parvin beta OS=Canis lupus familiaris OX=9615 GN=PARVB PE=4 SV=1	C_familiaris	9	10	87	9
High	Q28256	Platelet glycoprotein Ib alpha chain OS=Canis lupus familiaris OX=9615 GN=GP1BA PE=2 SV=2	C_familiaris	9	10	124	9
High	E2QW82	Matrix metallopeptidase 19 OS=Canis lupus familiaris OX=9615 GN=MMP19 PE=3 SV=3	C_familiaris	9	10	116	9
High	Q2PT31	Myocilin OS=Canis lupus familiaris OX=9615 GN=MYOC PE=1 SV=2	C_familiaris	9	9	28	9
High	A0A5F4CK68	Versican OS=Canis lupus familiaris OX=9615 GN=VCAN PE=4 SV=1	C_familiaris	9	11	51	9
High	E2RAF1	Uncharacterized protein OS=Canis lupus familiaris OX=9615 GN=CKMT1A PE=3 SV=1	C_familiaris	9	9	30	9
High	F6USM4	Mannan binding lectin serine peptidase 2 OS=Canis lupus familiaris OX=9615 GN=MASP2 PE=3 SV=1	C_familiaris	9	9	48	9
High	F1PH87	Serpin family A member 3 OS=Canis lupus familiaris OX=9615 GN=SERPINA3 PE=3 SV=3	C_familiaris	9	9	82	9
High	A0A5F4CKE9	Uncharacterized protein OS=Canis lupus familiaris OX=9615 GN=MAP4 PE=4 SV=1	C_familiaris	9	9	40	9
High	A0A5F4D8A3	Low density lipoprotein receptor OS=Canis lupus familiaris OX=9615 GN=LDLR PE=4 SV=1	C_familiaris	9	9	23	9
High	E2QUY1	RAS p21 protein activator 3 OS=Canis lupus familiaris OX=9615 GN=RASA3 PE=4 SV=2	C_familiaris	9	9	24	9
High	F1PNY2	Immunoglobulin kappa constant OS=Canis lupus familiaris OX=9615 GN=IGKC PE=4 SV=3	C_familiaris	8	31	5513	8
High	F1PBL1	14_3_3 domain-containing protein OS=Canis lupus familiaris OX=9615 GN=YWHAZ PE=3 SV=3	C_familiaris	12	17	251	8
High	P60524	Hemoglobin subunit beta OS=Canis lupus familiaris OX=9615 GN=HBB PE=1 SV=1	C_familiaris	9	13	448	8
High	F1PCE5	Serpin family A member 1 OS=Canis lupus familiaris OX=9615 GN=SERPINA1 PE=3 SV=3	C_familiaris	8	10	253	8
High	Q95MP7	Ferritin heavy chain OS=Canis lupus familiaris OX=9615 GN=FTH1 PE=2 SV=3	C_familiaris	8	12	195	8
High	E2R8A7	Collectin subfamily member 11 OS=Canis lupus familiaris OX=9615 GN=COLEC11 PE=4 SV=3	C_familiaris	8	12	289	8
High	E2QX53	Glucosamine-6-phosphate isomerase OS=Canis lupus familiaris OX=9615 GN=GNPDA1 PE=3 SV=1	C_familiaris	10	12	129	8
High	J9P6N4	Tyrosine 3-monooxygenase/tryptophan 5-monooxygenase activation protein eta OS=Canis lupus familiaris OX=9615 GN=YWHAH PE=3 SV=1	C_familiaris	12	16	147	8
High	F1PPL9	C1q domain-containing protein OS=Canis lupus familiaris OX=9615 GN=C1QTNF3 PE=4 SV=3	C_familiaris	8	12	94	8
High	F1Q3I5	Collagen alpha-1(I) chain OS=Canis lupus familiaris OX=9615 GN=COL1A1 PE=4 SV=3	C_familiaris	8	10	90	8
High	E2R4H4	Proteasome endopeptidase complex OS=Canis lupus familiaris OX=9615 GN=PSMA5 PE=3 SV=3	C_familiaris	8	11	65	8
High	F1P7F8	Zyxin OS=Canis lupus familiaris OX=9615 GN=ZYX PE=4 SV=3	C_familiaris	8	9	152	8
High	F1Q317	Galectin OS=Canis lupus familiaris OX=9615 GN=LGALS9 PE=4 SV=1	C_familiaris	8	13	111	8
High	E2R3R2	Proteasome subunit beta OS=Canis lupus familiaris OX=9615 GN=PSMB5 PE=3 SV=1	C_familiaris	8	8	101	8
High	E2R7E8	Acylaminoacyl-peptide hydrolase OS=Canis lupus familiaris OX=9615 GN=APEH PE=4 SV=2	C_familiaris	8	9	27	8
High	E2R5Q1	Calponin OS=Canis lupus familiaris OX=9615 GN=CNN2 PE=3 SV=2	C_familiaris	8	11	64	8
High	F1Q1K9	Hyaluronan binding protein 2 OS=Canis lupus familiaris OX=9615 GN=HABP2 PE=3 SV=3	C_familiaris	8	8	47	8
High	J9P064	Collectin subfamily member 10 OS=Canis lupus familiaris OX=9615 GN=COLEC10 PE=4 SV=1	C_familiaris	8	9	145	8
High	A0A5F4D8D4	Aspartyl aminopeptidase OS=Canis lupus familiaris OX=9615 GN=DNPEP PE=4 SV=1	C_familiaris	8	8	68	8
High	A0A5F4BQ47	Phospholipid transfer protein OS=Canis lupus familiaris OX=9615 GN=PLTP PE=4 SV=1	C_familiaris	8	8	94	8
High	J9NZX7	Malic enzyme OS=Canis lupus familiaris OX=9615 GN=ME1 PE=3 SV=2	C_familiaris	8	10	33	8
High	E2QXN8	Annexin OS=Canis lupus familiaris OX=9615 GN=ANXA11 PE=3 SV=2	C_familiaris	8	9	44	8
High	A0A5F4D0B9	EGF containing fibulin extracellular matrix protein 1 OS=Canis lupus familiaris OX=9615 GN=EFEMP1 PE=4 SV=1	C_familiaris	8	11	36	8
High	A0A5F4C6Q3	Amine oxidase copper containing 3 OS=Canis lupus familiaris OX=9615 GN=AOC3 PE=4 SV=1	C_familiaris	8	9	53	8
High	A0A5F4CLP4	Uncharacterized protein OS=Canis lupus familiaris OX=9615 GN=LOC609365 PE=4 SV=1	C_familiaris	8	12	92	8
High	A0A5F4CW76	ATP synthase subunit beta, mitochondrial OS=Canis lupus familiaris OX=9615 GN=ATP5F1B PE=4 SV=1	C_familiaris	8	8	37	8
High	E2RLY5	Leucine aminopeptidase 3 OS=Canis lupus familiaris OX=9615 GN=LAP3 PE=3 SV=2	C_familiaris	8	8	17	8
High	J9NYG8	Complement component 4 binding protein beta OS=Canis lupus familiaris OX=9615 GN=C4BPB PE=4 SV=1	C_familiaris	7	13	521	7
High	E2QWR0	Surfactant protein D OS=Canis lupus familiaris OX=9615 GN=SFTPD PE=4 SV=1	C_familiaris	7	12	177	7
High	Q53VB8	Ferritin light chain OS=Canis lupus familiaris OX=9615 GN=FTL PE=2 SV=3	C_familiaris	7	8	34	7
High	A0A5F4CAX2	Uncharacterized protein OS=Canis lupus familiaris OX=9615 PE=4 SV=1	C_familiaris	7	11	137	7
High	E2QX17	Proteasome subunit beta OS=Canis lupus familiaris OX=9615 GN=PSMB3 PE=3 SV=1	C_familiaris	7	8	105	7
High	A0A5F4D2T1	Actin related protein 2/3 complex subunit 1B OS=Canis lupus familiaris OX=9615 GN=ARPC1B PE=4 SV=1	C_familiaris	7	8	69	7
High	A0A5F4CHH4	Pleckstrin OS=Canis lupus familiaris OX=9615 GN=PLEK PE=4 SV=1	C_familiaris	7	8	97	7
High	J9NWG4	C-type lectin domain-containing protein OS=Canis lupus familiaris OX=9615 GN=MBL2 PE=4 SV=2	C_familiaris	7	9	339	7
High	E2R7N4	Hematopoietic cell-specific Lyn substrate 1 OS=Canis lupus familiaris OX=9615 GN=HCLS1 PE=4 SV=2	C_familiaris	7	9	61	7
High	F1Q1Q0	Coronin OS=Canis lupus familiaris OX=9615 GN=CORO1C PE=3 SV=3	C_familiaris	7	7	46	7
High	P38400	Guanine nucleotide-binding protein G(i) subunit alpha-2 OS=Canis lupus familiaris OX=9615 GN=GNAI2 PE=2 SV=2	C_familiaris	8	8	66	7
High	F1P7P3	F-actin-capping protein subunit alpha OS=Canis lupus familiaris OX=9615 GN=CAPZA1 PE=3 SV=2	C_familiaris	7	8	56	7
High	A0A5F4BUM0	Uncharacterized protein OS=Canis lupus familiaris OX=9615 GN=LOC607460 PE=4 SV=1	C_familiaris	7	11	21	7
High	E2QYM7	Thrombospondin 3 OS=Canis lupus familiaris OX=9615 GN=THBS3 PE=4 SV=1	C_familiaris	8	14	115	7
High	F1PKY3	Adenosine deaminase OS=Canis lupus familiaris OX=9615 GN=ADA PE=3 SV=3	C_familiaris	7	8	43	7
High	F1Q4J0	Glucosidase II alpha subunit OS=Canis lupus familiaris OX=9615 GN=GANAB PE=3 SV=2	C_familiaris	7	8	39	7
High	E2RQY6	Calcium-transporting ATPase OS=Canis lupus familiaris OX=9615 GN=ATP2A3 PE=3 SV=2	C_familiaris	9	9	38	7
High	A0A5F4CR47	Nidogen 1 OS=Canis lupus familiaris OX=9615 GN=NID1 PE=4 SV=1	C_familiaris	7	7	56	7
High	E2QXY7	Actin-related protein 2 OS=Canis lupus familiaris OX=9615 GN=ACTR2 PE=3 SV=3	C_familiaris	7	9	64	7
High	F1PEK5	Septin 2 OS=Canis lupus familiaris OX=9615 GN=SEPTIN2 PE=3 SV=3	C_familiaris	7	8	49	7
High	F1PD77	Proteasome activator subunit 2 OS=Canis lupus familiaris OX=9615 GN=PSME2 PE=4 SV=2	C_familiaris	7	7	25	7
High	A0A5F4DKK2	Attractin OS=Canis lupus familiaris OX=9615 GN=ATRN PE=4 SV=1	C_familiaris	7	7	72	7
High	A0A5F4CI63	Latent transforming growth factor beta binding protein 1 OS=Canis lupus familiaris OX=9615 GN=LTBP1 PE=4 SV=1	C_familiaris	7	7	24	7
High	J9P983	Exostosin like glycosyltransferase 2 OS=Canis lupus familiaris OX=9615 GN=EXTL2 PE=4 SV=2	C_familiaris	7	8	51	7
High	F6UZV8	Calpain 1 OS=Canis lupus familiaris OX=9615 GN=CAPN1 PE=3 SV=2	C_familiaris	7	8	19	7
High	E2R7N5	Coronin OS=Canis lupus familiaris OX=9615 GN=CORO1B PE=3 SV=1	C_familiaris	7	8	45	7
High	E2QX19	Macrophage stimulating 1 OS=Canis lupus familiaris OX=9615 GN=MST1 PE=3 SV=3	C_familiaris	7	7	20	7
High	E2RMF9	Serpin family A member 5 OS=Canis lupus familiaris OX=9615 GN=SERPINA5 PE=3 SV=2	C_familiaris	7	7	23	7
High	A0A5F4C0D1	Complement C1q A chain OS=Canis lupus familiaris OX=9615 GN=C1QA PE=4 SV=1	C_familiaris	6	14	580	6
High	J9PAX5	Ig-like domain-containing protein OS=Canis lupus familiaris OX=9615 PE=4 SV=2	C_familiaris	8	26	1806	6
High	J9P889	Collagen type VI alpha 1 chain OS=Canis lupus familiaris OX=9615 GN=COL6A1 PE=4 SV=2	C_familiaris	14	16	164	6
High	E2RBR6	Proteasome subunit beta OS=Canis lupus familiaris OX=9615 GN=PSMB4 PE=3 SV=1	C_familiaris	6	12	163	6
High	F1PKW7	Tyrosine 3-monooxygenase/tryptophan 5-monooxygenase activation protein beta OS=Canis lupus familiaris OX=9615 GN=YWHAB PE=3 SV=3	C_familiaris	10	13	167	6
High	F1PL63	Fructose-bisphosphate aldolase OS=Canis lupus familiaris OX=9615 GN=ALDOC PE=3 SV=1	C_familiaris	8	11	184	6
High	F1PGY1	Heat shock protein 90 alpha family class A member 1 OS=Canis lupus familiaris OX=9615 GN=HSP90AA1 PE=4 SV=3	C_familiaris	13	14	163	6
High	A0A0B4J198	Adiponectin D OS=Canis lupus familiaris OX=9615 GN=EIF4A2 PE=4 SV=2	C_familiaris	6	10	724	6
High	E2QUV3	Alpha 2-HS glycoprotein OS=Canis lupus familiaris OX=9615 GN=AHSG PE=4 SV=2	C_familiaris	8	10	41	6
High	A0A5F4CBH6	Uncharacterized protein OS=Canis lupus familiaris OX=9615 PE=4 SV=1	C_familiaris	8	11	481	6
High	F1PQS2	Metalloproteinase inhibitor 1 OS=Canis lupus familiaris OX=9615 GN=TIMP1 PE=4 SV=2	C_familiaris	6	7	68	6
High	E2RQ71	Apolipoprotein M OS=Canis lupus familiaris OX=9615 GN=APOM PE=4 SV=2	C_familiaris	6	8	68	6
High	E2RPC6	Proteasome subunit beta OS=Canis lupus familiaris OX=9615 GN=PSMB7 PE=2 SV=3	C_familiaris	6	9	115	6
High	E2R5U8	Transthyretin OS=Canis lupus familiaris OX=9615 GN=TTR PE=3 SV=1	C_familiaris	6	6	111	6
High	J9P3W8	Nicotinate phosphoribosyltransferase OS=Canis lupus familiaris OX=9615 GN=NAPRT PE=3 SV=2	C_familiaris	6	7	21	6
High	F1PXG0	Sorbitol dehydrogenase OS=Canis lupus familiaris OX=9615 GN=SORD PE=3 SV=2	C_familiaris	6	7	22	6
High	Q7YQC6	Heat shock 70 kDa protein 1 OS=Canis lupus familiaris OX=9615 GN=HSPA1 PE=2 SV=1	C_familiaris	9	12	123	6
High	E2RBA8	PDZ and LIM domain 5 OS=Canis lupus familiaris OX=9615 GN=PDLIM5 PE=4 SV=1	C_familiaris	6	7	27	6
High	J9P870	Insulin like growth factor binding protein 6 OS=Canis lupus familiaris OX=9615 GN=IGFBP6 PE=4 SV=2	C_familiaris	6	8	22	6
High	E2RKR4	Proteasome subunit alpha type OS=Canis lupus familiaris OX=9615 GN=PSMA3 PE=3 SV=2	C_familiaris	6	7	99	6
High	E2RD65	Actin-related protein 2/3 complex subunit 5 OS=Canis lupus familiaris OX=9615 GN=ARPC5 PE=3 SV=3	C_familiaris	6	6	34	6
High	A0A5F4CB57	Tissue alpha-L-fucosidase OS=Canis lupus familiaris OX=9615 GN=FUCA1 PE=4 SV=1	C_familiaris	6	9	22	6
High	E2RGF3	Na(+)/H(+) exchange regulatory cofactor NHE-RF OS=Canis lupus familiaris OX=9615 GN=SLC9A3R1 PE=2 SV=3	C_familiaris	6	7	46	6
High	E2QXA6	Calpastatin OS=Canis lupus familiaris OX=9615 GN=CAST PE=4 SV=3	C_familiaris	6	8	41	6
High	F1PXU1	Spectrin beta chain OS=Canis lupus familiaris OX=9615 GN=SPTBN1 PE=3 SV=3	C_familiaris	7	7	15	6
High	J9NX73	Uncharacterized protein OS=Canis lupus familiaris OX=9615 GN=RPIA PE=3 SV=1	C_familiaris	6	6	10	6
High	E2R1N7	Prenylcysteine oxidase 1 OS=Canis lupus familiaris OX=9615 GN=PCYOX1 PE=3 SV=1	C_familiaris	6	6	48	6
High	E2RRC9	Phosphoglycerate kinase OS=Canis lupus familiaris OX=9615 GN=PGK1 PE=3 SV=1	C_familiaris	6	6	39	6
High	F6UY11	Proteasome activator subunit 1 OS=Canis lupus familiaris OX=9615 GN=PSME1 PE=4 SV=2	C_familiaris	6	7	26	6
High	F1PAA9	Cadherin-1 OS=Canis lupus familiaris OX=9615 GN=CDH1 PE=1 SV=2	C_familiaris	6	6	15	6
High	A0A5F4CXK5	Ectonucleotide pyrophosphatase/phosphodiesterase 2 OS=Canis lupus familiaris OX=9615 GN=ENPP2 PE=4 SV=1	C_familiaris	6	6	15	6
High	J9P153	Latent transforming growth factor beta binding protein 2 OS=Canis lupus familiaris OX=9615 GN=LTBP2 PE=4 SV=1	C_familiaris	6	6	18	6
High	E2RT65	Phosphoglycerate mutase OS=Canis lupus familiaris OX=9615 GN=PGAM1 PE=3 SV=2	C_familiaris	6	6	30	6
High	J9P5M2	Lymphocyte specific protein 1 OS=Canis lupus familiaris OX=9615 GN=LSP1 PE=4 SV=2	C_familiaris	6	7	24	6
High	E2RNG2	ATP synthase subunit alpha OS=Canis lupus familiaris OX=9615 GN=ATP5F1A PE=3 SV=2	C_familiaris	6	6	40	6
High	Q28260	Vascular cell adhesion protein 1 OS=Canis lupus familiaris OX=9615 GN=VCAM1 PE=2 SV=1	C_familiaris	6	6	25	6
High	A0A5F4D182	Serine hydroxymethyltransferase 1 OS=Canis lupus familiaris OX=9615 GN=SHMT1 PE=4 SV=1	C_familiaris	6	6	16	6
High	A0A5F4C5N1	Hexose-6-phosphate dehydrogenase/glucose 1-dehydrogenase OS=Canis lupus familiaris OX=9615 GN=H6PD PE=4 SV=1	C_familiaris	6	6	6	6
High	J9NY79	Malate dehydrogenase OS=Canis lupus familiaris OX=9615 PE=3 SV=2	C_familiaris	6	6	33	6
High	E2R9D2	Coagulation factor XII OS=Canis lupus familiaris OX=9615 GN=F12 PE=4 SV=3	C_familiaris	6	6	45	6
High	A0A5F4CR91	Basigin OS=Canis lupus familiaris OX=9615 GN=BSG PE=4 SV=1	C_familiaris	6	6	61	6
High	E2RE03	Cadherin 5 OS=Canis lupus familiaris OX=9615 GN=CDH5 PE=4 SV=3	C_familiaris	6	6	31	6
High	F6UXI8	Inosine-5'-monophosphate dehydrogenase OS=Canis lupus familiaris OX=9615 GN=IMPDH2 PE=3 SV=2	C_familiaris	6	6	15	6
High	F6XY66	Transforming protein RhoA OS=Canis lupus familiaris OX=9615 GN=RHOA PE=4 SV=1	C_familiaris	6	6	25	6
High	F1PAG6	Arp2/3 complex 34 kDa subunit OS=Canis lupus familiaris OX=9615 GN=ARPC2 PE=3 SV=3	C_familiaris	6	6	18	6
High	J9NTL5	Glycoprotein Ib platelet subunit beta OS=Canis lupus familiaris OX=9615 GN=GP1BB PE=4 SV=2	C_familiaris	6	6	35	6
High	F1PP71	F11 receptor OS=Canis lupus familiaris OX=9615 GN=F11R PE=4 SV=3	C_familiaris	6	6	32	6
High	J9P8M2	Fibronectin OS=Canis lupus familiaris OX=9615 GN=FN1 PE=4 SV=2	C_familiaris	110	375	14852	5
High	A0A5F4BYJ5	Uncharacterized protein OS=Canis lupus familiaris OX=9615 PE=4 SV=1	C_familiaris	36	90	12531	5
High	A0A5F4CS96	Uncharacterized protein OS=Canis lupus familiaris OX=9615 GN=LOC106557476 PE=4 SV=1	C_familiaris	20	23	379	5
High	A0A5F4C3X9	Actinin alpha 4 OS=Canis lupus familiaris OX=9615 GN=ACTN4 PE=4 SV=1	C_familiaris	27	28	218	5
High	E2RJC2	Complement C1q C chain OS=Canis lupus familiaris OX=9615 GN=C1QC PE=4 SV=2	C_familiaris	5	20	1567	5
High	A0A5F4D721	Tropomyosin 3 OS=Canis lupus familiaris OX=9615 GN=TPM3 PE=4 SV=1	C_familiaris	18	19	157	5
High	J9NY02	Ig-like domain-containing protein OS=Canis lupus familiaris OX=9615 PE=4 SV=2	C_familiaris	10	29	1909	5
High	Q28259	Glyceraldehyde-3-phosphate dehydrogenase OS=Canis lupus familiaris OX=9615 GN=GAPDH PE=2 SV=3	C_familiaris	10	14	214	5
High	A0A5F4CUQ1	Tropomyosin 1 OS=Canis lupus familiaris OX=9615 GN=TPM1 PE=4 SV=1	C_familiaris	14	14	96	5
High	A0A5F4DGD5	Uncharacterized protein OS=Canis lupus familiaris OX=9615 PE=4 SV=1	C_familiaris	5	10	469	5
High	E2RLS3	Heat shock protein 90 alpha family class B member 1 OS=Canis lupus familiaris OX=9615 GN=HSP90AB1 PE=3 SV=2	C_familiaris	12	12	164	5
High	A0A5F4D572	Uncharacterized protein OS=Canis lupus familiaris OX=9615 PE=4 SV=1	C_familiaris	5	11	392	5
High	F1PVR5	Uncharacterized protein OS=Canis lupus familiaris OX=9615 PE=4 SV=3	C_familiaris	5	5	10	5
High	F1PUB5	Proteasome endopeptidase complex OS=Canis lupus familiaris OX=9615 GN=PSMA7 PE=3 SV=3	C_familiaris	8	8	185	5
High	J9P028	Glutathione peroxidase OS=Canis lupus familiaris OX=9615 GN=GPX3 PE=3 SV=2	C_familiaris	5	8	161	5
High	J9NYN2	Cysteine and glycine rich protein 1 OS=Canis lupus familiaris OX=9615 GN=CSRP1 PE=4 SV=1	C_familiaris	5	6	38	5
High	E2RSI6	FERM domain-containing protein OS=Canis lupus familiaris OX=9615 GN=EZR PE=4 SV=1	C_familiaris	9	10	58	5
High	E2RKG6	Dermokine OS=Canis lupus familiaris OX=9615 GN=DMKN PE=4 SV=3	C_familiaris	5	6	34	5
High	J9P346	SCY domain-containing protein OS=Canis lupus familiaris OX=9615 GN=PPBP PE=3 SV=1	C_familiaris	5	5	60	5
High	J9NXY7	PDZ and LIM domain 1 OS=Canis lupus familiaris OX=9615 GN=PDLIM1 PE=4 SV=2	C_familiaris	5	7	21	5
High	A0A5F4CC39	Elastin microfibril interfacer 1 OS=Canis lupus familiaris OX=9615 GN=EMILIN1 PE=4 SV=1	C_familiaris	5	6	30	5
High	E2R5J0	Pentaxin OS=Canis lupus familiaris OX=9615 GN=CRP PE=3 SV=2	C_familiaris	5	5	47	5
High	G1K2D7	Coagulation factor IX OS=Canis lupus familiaris OX=9615 GN=F9 PE=3 SV=1	C_familiaris	5	5	27	5
High	A0A5F4CTU1	Septin 7 OS=Canis lupus familiaris OX=9615 GN=SEPTIN7 PE=4 SV=1	C_familiaris	6	6	52	5
High	P62872	Guanine nucleotide-binding protein G(I)/G(S)/G(T) subunit beta-1 OS=Canis lupus familiaris OX=9615 GN=GNB1 PE=2 SV=3	C_familiaris	8	8	63	5
High	A0A5F4CJ02	Esterase D OS=Canis lupus familiaris OX=9615 GN=ESD PE=4 SV=1	C_familiaris	5	6	16	5
High	F1PS47	RAN binding protein 3 OS=Canis lupus familiaris OX=9615 GN=RANBP3 PE=4 SV=3	C_familiaris	5	5	17	5
High	E2R0D2	Scavenger receptor cysteine rich family member with 5 domains OS=Canis lupus familiaris OX=9615 GN=SSC5D PE=4 SV=3	C_familiaris	5	6	30	5
High	E2RRR2	Hydroxysteroid 17-beta dehydrogenase 14 OS=Canis lupus familiaris OX=9615 GN=HSD17B14 PE=4 SV=1	C_familiaris	5	8	17	5
High	F1PK62	Peptidyl-prolyl cis-trans isomerase OS=Canis lupus familiaris OX=9615 PE=3 SV=2	C_familiaris	5	10	64	5
High	F1PPR8	Beta-glucuronidase OS=Canis lupus familiaris OX=9615 GN=GUSB PE=3 SV=2	C_familiaris	5	5	29	5
High	A0A5F4BXK6	Carboxylesterase 5A OS=Canis lupus familiaris OX=9615 GN=CES5A PE=4 SV=1	C_familiaris	5	6	22	5
High	A0A5F4DIU8	Uncharacterized protein OS=Canis lupus familiaris OX=9615 GN=FUBP1 PE=4 SV=1	C_familiaris	5	6	15	5
High	E2R516	Synaptosomal-associated protein OS=Canis lupus familiaris OX=9615 GN=SNAP23 PE=3 SV=1	C_familiaris	5	5	32	5
High	A0A5F4C710	Heparan sulfate proteoglycan 2 OS=Canis lupus familiaris OX=9615 GN=HSPG2 PE=4 SV=1	C_familiaris	5	5	28	5
High	E2QTA2	Papilin, proteoglycan like sulfated glycoprotein OS=Canis lupus familiaris OX=9615 GN=PAPLN PE=4 SV=2	C_familiaris	5	5	16	5
High	E2RNL8	Apolipoprotein D OS=Canis lupus familiaris OX=9615 GN=APOD PE=3 SV=3	C_familiaris	5	5	98	5
High	E2RJK1	SH3 domain binding protein 1 OS=Canis lupus familiaris OX=9615 GN=SH3BP1 PE=4 SV=3	C_familiaris	5	6	10	5
High	A0A5F4DIK8	Four and a half LIM domains 1 OS=Canis lupus familiaris OX=9615 GN=FHL1 PE=4 SV=1	C_familiaris	5	5	23	5
High	F1PNI8	Pro-interleukin-16 OS=Canis lupus familiaris OX=9615 GN=IL16 PE=4 SV=3	C_familiaris	5	5	9	5
High	A0A5F4CP88	Protein tyrosine phosphatase receptor type C OS=Canis lupus familiaris OX=9615 GN=PTPRC PE=4 SV=1	C_familiaris	5	5	20	5
High	F1Q2J4	Notch receptor 3 OS=Canis lupus familiaris OX=9615 GN=NOTCH3 PE=4 SV=3	C_familiaris	5	5	18	5
High	E2RGD3	Twinfilin actin binding protein 2 OS=Canis lupus familiaris OX=9615 GN=TWF2 PE=4 SV=2	C_familiaris	6	6	23	5
High	E2QUU5	60 kDa heat shock protein, mitochondrial OS=Canis lupus familiaris OX=9615 GN=HSPD1 PE=3 SV=2	C_familiaris	5	5	47	5
High	Q1HE58	Ras-related protein Rab-27A OS=Canis lupus familiaris OX=9615 GN=RAB27A PE=2 SV=1	C_familiaris	5	6	19	5
High	E2QW34	Proteasome subunit beta OS=Canis lupus familiaris OX=9615 GN=PSMB2 PE=3 SV=1	C_familiaris	5	7	29	5
High	F1P7V6	Stress induced phosphoprotein 1 OS=Canis lupus familiaris OX=9615 GN=STIP1 PE=4 SV=3	C_familiaris	5	5	16	5
High	A0A5F4CXZ9	Uncharacterized protein OS=Canis lupus familiaris OX=9615 GN=MYL6 PE=4 SV=1	C_familiaris	5	5	20	5
High	P62999	Ras-related C3 botulinum toxin substrate 1 OS=Canis lupus familiaris OX=9615 GN=RAC1 PE=2 SV=1	C_familiaris	6	6	20	5
High	A0A5F4DH03	Coagulation factor X OS=Canis lupus familiaris OX=9615 GN=F10 PE=4 SV=1	C_familiaris	5	5	28	5
High	A0A5F4CNG7	Desmoplakin OS=Canis lupus familiaris OX=9615 GN=DSP PE=4 SV=1	C_familiaris	5	5	8	5
High	A0A5F4D5V1	Fibulin 1 OS=Canis lupus familiaris OX=9615 GN=FBLN1 PE=4 SV=1	C_familiaris	19	28	472	4
High	L7N0I7	Tubulin beta chain OS=Canis lupus familiaris OX=9615 GN=TUBB4B PE=3 SV=1	C_familiaris	21	33	374	4
High	E2RBC3	Tubulin alpha chain OS=Canis lupus familiaris OX=9615 GN=TUBA4A PE=3 SV=2	C_familiaris	18	21	361	4
High	J9NZT2	Ig-like domain-containing protein OS=Canis lupus familiaris OX=9615 PE=4 SV=2	C_familiaris	9	31	1869	4
High	A0A5S6CZL3	Apolipoprotein A-IV OS=Canis lupus familiaris OX=9615 GN=APOA4 PE=3 SV=1	C_familiaris	8	13	361	4
High	A0A5F4BYG2	Uncharacterized protein OS=Canis lupus familiaris OX=9615 PE=4 SV=1	C_familiaris	5	8	809	4
High	A0A5F4BUJ7	Uncharacterized protein OS=Canis lupus familiaris OX=9615 PE=4 SV=1	C_familiaris	5	8	205	4
High	C0LQL0	Protein S100 OS=Canis lupus familiaris OX=9615 GN=S100A8 PE=2 SV=1	C_familiaris	4	5	5	4
High	J9NYN4	Uncharacterized protein OS=Canis lupus familiaris OX=9615 GN=TGOLN2 PE=4 SV=1	C_familiaris	4	4	35	4
High	A0A5F4C8H0	Glucosamine-6-phosphate deaminase 2 OS=Canis lupus familiaris OX=9615 GN=GNPDA2 PE=4 SV=1	C_familiaris	6	7	78	4
High	A0A5F4DFV1	Apolipoprotein C-III OS=Canis lupus familiaris OX=9615 GN=APOC3 PE=4 SV=1	C_familiaris	4	7	109	4
High	F6XKC0	Complement C8 gamma chain OS=Canis lupus familiaris OX=9615 GN=C8G PE=3 SV=2	C_familiaris	4	5	26	4
High	Q2TFN9	Heat shock 70 kDa protein 4 OS=Canis lupus familiaris OX=9615 GN=HSPA4 PE=1 SV=1	C_familiaris	4	7	28	4
High	E2RTE8	6-pyruvoyltetrahydropterin synthase OS=Canis lupus familiaris OX=9615 GN=PTS PE=4 SV=1	C_familiaris	4	4	25	4
High	F1P6U6	Cadherin 11 OS=Canis lupus familiaris OX=9615 GN=CDH11 PE=4 SV=2	C_familiaris	4	4	26	4
High	A0A5F4DDK9	Purine nucleoside phosphorylase OS=Canis lupus familiaris OX=9615 GN=PNP PE=4 SV=1	C_familiaris	4	4	26	4
High	F2Z4Q7	Serpin family F member 1 OS=Canis lupus familiaris OX=9615 GN=SERPINF1 PE=3 SV=1	C_familiaris	4	5	11	4
High	E2RT39	Maltase-glucoamylase 2 (putative) OS=Canis lupus familiaris OX=9615 GN=MGAM2 PE=4 SV=3	C_familiaris	6	7	31	4
High	A0A5F4C175	Platelet and endothelial cell adhesion molecule 1 OS=Canis lupus familiaris OX=9615 GN=PECAM1 PE=4 SV=1	C_familiaris	4	5	23	4
High	A0A5F4BRR8	Stomatin OS=Canis lupus familiaris OX=9615 GN=STOM PE=4 SV=1	C_familiaris	4	4	9	4
High	H9GWE2	Uncharacterized protein OS=Canis lupus familiaris OX=9615 PE=4 SV=3	C_familiaris	4	5	13	4
High	E2RA67	C-C motif chemokine OS=Canis lupus familiaris OX=9615 GN=CCL14 PE=3 SV=2	C_familiaris	4	5	53	4
High	F1PD51	Erythrocyte membrane protein band 4.2 OS=Canis lupus familiaris OX=9615 GN=EPB42 PE=4 SV=3	C_familiaris	5	5	29	4
High	P81709	Lysozyme C, spleen isozyme OS=Canis lupus familiaris OX=9615 PE=1 SV=1	C_familiaris	4	6	34	4
High	A0A5F4CE33	Triggering receptor expressed on myeloid cells 2 OS=Canis lupus familiaris OX=9615 GN=TREM2 PE=4 SV=1	C_familiaris	4	4	37	4
High	J9P3M1	LIM and SH3 protein 1 OS=Canis lupus familiaris OX=9615 GN=LASP1 PE=4 SV=2	C_familiaris	4	5	50	4
High	A0A5F4BTS3	WASP actin nucleation promoting factor OS=Canis lupus familiaris OX=9615 GN=WAS PE=4 SV=1	C_familiaris	4	4	12	4
High	E2RAK7	Apolipoprotein A-II OS=Canis lupus familiaris OX=9615 GN=APOA2 PE=1 SV=2	C_familiaris	4	4	14	4
High	J9NT73	Brain abundant membrane attached signal protein 1 OS=Canis lupus familiaris OX=9615 GN=BASP1 PE=4 SV=2	C_familiaris	4	4	36	4
High	A4GT58	Cdc42 GTPase-activating protein OS=Canis lupus familiaris OX=9615 GN=ARHGAP1 PE=2 SV=1	C_familiaris	4	4	18	4
High	J9NX46	Clathrin light chain A OS=Canis lupus familiaris OX=9615 GN=CLTA PE=3 SV=1	C_familiaris	4	5	36	4
High	E2RJW7	Adducin 1 OS=Canis lupus familiaris OX=9615 GN=ADD1 PE=4 SV=3	C_familiaris	4	4	16	4
High	F1PKI4	Chloride intracellular channel protein OS=Canis lupus familiaris OX=9615 GN=CLIC1 PE=3 SV=2	C_familiaris	4	4	20	4
High	J9PA20	Uncharacterized protein OS=Canis lupus familiaris OX=9615 PE=4 SV=2	C_familiaris	5	5	16	4
High	A0A5F4CYM9	Annexin A5 OS=Canis lupus familiaris OX=9615 GN=ANXA5 PE=4 SV=1	C_familiaris	4	4	7	4
High	F1P719	EH domain containing 4 OS=Canis lupus familiaris OX=9615 GN=EHD4 PE=3 SV=2	C_familiaris	6	6	20	4
High	J9NVF6	Uncharacterized protein OS=Canis lupus familiaris OX=9615 GN=CEACAM28 PE=4 SV=1	C_familiaris	4	4	10	4
High	A0A5F4DF90	P21 (RAC1) activated kinase 2 OS=Canis lupus familiaris OX=9615 GN=PAK2 PE=4 SV=1	C_familiaris	4	6	10	4
High	E2RMC1	ST13 Hsp70 interacting protein OS=Canis lupus familiaris OX=9615 GN=ST13 PE=4 SV=3	C_familiaris	4	4	20	4
High	E2RB37	Protein disulfide isomerase family A member 6 OS=Canis lupus familiaris OX=9615 GN=PDIA6 PE=3 SV=1	C_familiaris	4	4	21	4
High	Q28288	Syntaxin-binding protein 2 OS=Canis lupus familiaris OX=9615 GN=STXBP2 PE=2 SV=1	C_familiaris	4	4	25	4
High	E2RMT7	GMP reductase OS=Canis lupus familiaris OX=9615 GN=GMPR PE=3 SV=1	C_familiaris	4	4	31	4
High	E2R7L1	Protein disulfide-isomerase A4 OS=Canis lupus familiaris OX=9615 GN=PDIA4 PE=3 SV=2	C_familiaris	4	4	21	4
High	E2R0P3	Isochorismatase domain containing 1 OS=Canis lupus familiaris OX=9615 GN=ISOC1 PE=4 SV=2	C_familiaris	4	5	19	4
High	F1PHY1	Collagen alpha-2(I) chain OS=Canis lupus familiaris OX=9615 GN=COL1A2 PE=4 SV=1	C_familiaris	4	4	10	4
High	A0A5F4CSJ2	Protein tyrosine phosphatase receptor type F OS=Canis lupus familiaris OX=9615 GN=PTPRF PE=4 SV=1	C_familiaris	4	5	18	4
High	E2QYX1	Phosphoglycerate mutase OS=Canis lupus familiaris OX=9615 GN=BPGM PE=3 SV=1	C_familiaris	4	5	9	4
High	Q8HZM5	Glutamine synthetase OS=Canis lupus familiaris OX=9615 GN=GLUL PE=1 SV=3	C_familiaris	4	4	16	4
High	J9NYQ3	Acid sphingomyelinase-like phosphodiesterase OS=Canis lupus familiaris OX=9615 GN=SMPDL3A PE=3 SV=2	C_familiaris	4	4	17	4
High	A0A5F4D6J0	Protocadherin 1 OS=Canis lupus familiaris OX=9615 GN=PCDH1 PE=4 SV=1	C_familiaris	4	4	18	4
High	E2RLK6	Adiponectin F1 OS=Canis lupus familiaris OX=9615 GN=LOC609026 PE=4 SV=1	C_familiaris	4	4	13	4
High	F1PDG4	Uncharacterized protein OS=Canis lupus familiaris OX=9615 GN=UBB PE=4 SV=2	C_familiaris	4	4	91	4
High	F1PR80	Serine peptidase inhibitor, Kazal type 5 OS=Canis lupus familiaris OX=9615 GN=SPINK5 PE=4 SV=3	C_familiaris	4	4	9	4
High	E2R413	Capping actin protein, gelsolin like OS=Canis lupus familiaris OX=9615 GN=CAPG PE=4 SV=3	C_familiaris	4	4	19	4
High	A0A5F4BUN7	Fructose-bisphosphatase 1 OS=Canis lupus familiaris OX=9615 GN=FBP1 PE=4 SV=1	C_familiaris	4	4	8	4
High	E2RLN1	Serpin family D member 1 OS=Canis lupus familiaris OX=9615 GN=SERPIND1 PE=3 SV=2	C_familiaris	4	4	28	4
High	E2R231	Dickkopf WNT signaling pathway inhibitor 3 OS=Canis lupus familiaris OX=9615 GN=DKK3 PE=4 SV=3	C_familiaris	4	4	7	4
High	A0A5F4CN31	Glucose-6-phosphate isomerase OS=Canis lupus familiaris OX=9615 GN=GPI PE=4 SV=1	C_familiaris	4	4	5	4
High	Q6TN20	Cathelicidin OS=Canis lupus familiaris OX=9615 GN=CAMP PE=2 SV=1	C_familiaris	4	4	29	4
High	E2R115	CD226 molecule OS=Canis lupus familiaris OX=9615 GN=CD226 PE=4 SV=2	C_familiaris	4	4	11	4
High	P62490	Ras-related protein Rab-11A OS=Canis lupus familiaris OX=9615 GN=RAB11A PE=2 SV=3	C_familiaris	4	4	47	4
High	F6XNH4	Methylenetetrahydrofolate dehydrogenase, cyclohydrolase and formyltetrahydrofolate synthetase 1 OS=Canis lupus familiaris OX=9615 GN=MTHFD1 PE=3 SV=2	C_familiaris	4	4	6	4
High	E2R574	Uncharacterized protein OS=Canis lupus familiaris OX=9615 GN=EEF1G PE=4 SV=1	C_familiaris	4	4	16	4
High	L7N0L3	Histone H4 OS=Canis lupus familiaris OX=9615 PE=3 SV=2	C_familiaris	4	4	14	4
High	A0A5F4DI49	Glycyl-tRNA synthetase OS=Canis lupus familiaris OX=9615 GN=GARS1 PE=4 SV=1	C_familiaris	4	4	8	4
High	F1PIP7	Collagen type VII alpha 1 chain OS=Canis lupus familiaris OX=9615 GN=COL7A1 PE=4 SV=2	C_familiaris	4	4	12	4
High	A0A5F4C7I2	Family with sequence similarity 71 member F1 OS=Canis lupus familiaris OX=9615 GN=FAM71F1 PE=4 SV=1	C_familiaris	4	4	17	4
High	A0A5F4C290	Septin 9 OS=Canis lupus familiaris OX=9615 GN=SEPTIN9 PE=4 SV=1	C_familiaris	4	4	8	4
High	F1P703	Niban apoptosis regulator 1 OS=Canis lupus familiaris OX=9615 GN=NIBAN1 PE=4 SV=3	C_familiaris	4	4	6	4
High	P49822	Serum albumin OS=Canis lupus familiaris OX=9615 GN=ALB PE=1 SV=3	C_familiaris	53	85	7671	3
High	A0A5F4BNP2	Uncharacterized protein OS=Canis lupus familiaris OX=9615 PE=4 SV=1	C_familiaris	28	58	7697	3
High	E2R886	Kininogen 1 OS=Canis lupus familiaris OX=9615 GN=KNG1 PE=4 SV=3	C_familiaris	22	33	663	3
High	H9GWR8	Ig-like domain-containing protein OS=Canis lupus familiaris OX=9615 PE=4 SV=2	C_familiaris	11	17	6645	3
High	J9NSQ1	Ig-like domain-containing protein OS=Canis lupus familiaris OX=9615 PE=4 SV=2	C_familiaris	11	17	6439	3
High	F1PBT3	Fructose-bisphosphate aldolase OS=Canis lupus familiaris OX=9615 GN=ALDOA PE=3 SV=3	C_familiaris	19	25	449	3
High	E2QSF4	Tubulin beta chain OS=Canis lupus familiaris OX=9615 GN=TUBB PE=3 SV=1	C_familiaris	20	31	387	3
High	F1PQ99	Mannan binding lectin serine peptidase 1 OS=Canis lupus familiaris OX=9615 GN=MASP1 PE=3 SV=2	C_familiaris	19	23	604	3
High	J9PAL2	Ig-like domain-containing protein OS=Canis lupus familiaris OX=9615 PE=4 SV=2	C_familiaris	8	20	1120	3
High	A0A5F4C2R6	Uncharacterized protein OS=Canis lupus familiaris OX=9615 PE=4 SV=1	C_familiaris	8	23	1104	3
High	E2RNL3	Peroxiredoxin 4 OS=Canis lupus familiaris OX=9615 GN=PRDX4 PE=4 SV=2	C_familiaris	11	17	317	3
High	F1PZH8	Bridging integrator 2 OS=Canis lupus familiaris OX=9615 GN=BIN2 PE=4 SV=3	C_familiaris	16	19	208	3
High	A0A5F4CSD5	Uncharacterized protein OS=Canis lupus familiaris OX=9615 PE=4 SV=1	C_familiaris	9	24	1731	3
High	A0A5F4D2F2	Uncharacterized protein OS=Canis lupus familiaris OX=9615 PE=4 SV=1	C_familiaris	8	26	1972	3
High	A0A5F4CH63	Uncharacterized protein OS=Canis lupus familiaris OX=9615 PE=4 SV=1	C_familiaris	3	11	455	3
High	L7N0I1	Uncharacterized protein OS=Canis lupus familiaris OX=9615 GN=MYL12B PE=4 SV=1	C_familiaris	8	10	94	3
High	E2RPB8	C-type lectin domain family 3 member B OS=Canis lupus familiaris OX=9615 GN=CLEC3B PE=4 SV=3	C_familiaris	5	6	142	3
High	A0A5F4D5I3	Uncharacterized protein OS=Canis lupus familiaris OX=9615 PE=4 SV=1	C_familiaris	5	7	986	3
High	P01784	Ig heavy chain V region GOM OS=Canis lupus familiaris OX=9615 PE=1 SV=1	C_familiaris	4	11	264	3
High	A0A5F4CZV7	Uncharacterized protein OS=Canis lupus familiaris OX=9615 PE=4 SV=1	C_familiaris	3	7	595	3
High	P02677	Fibrinogen beta chain (Fragment) OS=Canis lupus familiaris OX=9615 GN=FGB PE=1 SV=2	C_familiaris	4	4	370	3
High	F1PH61	Ig-like domain-containing protein OS=Canis lupus familiaris OX=9615 PE=4 SV=3	C_familiaris	4	5	205	3
High	F1PF90	Ig-like domain-containing protein OS=Canis lupus familiaris OX=9615 PE=4 SV=3	C_familiaris	5	8	260	3
High	A0A5F4D0L8	Septin 6 OS=Canis lupus familiaris OX=9615 GN=SEPTIN6 PE=4 SV=1	C_familiaris	5	5	54	3
High	J9P732	EF-hand domain-containing protein OS=Canis lupus familiaris OX=9615 GN=S100A9 PE=3 SV=2	C_familiaris	3	6	58	3
High	E2RPA8	Tetraspanin OS=Canis lupus familiaris OX=9615 GN=CD151 PE=3 SV=3	C_familiaris	3	3	28	3
High	E2R5E9	TR_THY domain-containing protein OS=Canis lupus familiaris OX=9615 PE=4 SV=3	C_familiaris	3	3	62	3
High	F1PKL6	Ig-like domain-containing protein OS=Canis lupus familiaris OX=9615 PE=4 SV=3	C_familiaris	3	4	44	3
High	P12278	Apolipoprotein C-II OS=Canis lupus familiaris OX=9615 GN=APOC2 PE=1 SV=1	C_familiaris	3	4	8	3
High	G1K299	Beta-glucuronidase OS=Canis lupus familiaris OX=9615 GN=GUSB PE=3 SV=2	C_familiaris	3	3	8	3
High	A0A5F4CGU2	Pyruvate kinase PKLR OS=Canis lupus familiaris OX=9615 GN=PKLR PE=4 SV=1	C_familiaris	4	5	25	3
High	F1P9L1	S-methyl-5'-thioadenosine phosphorylase OS=Canis lupus familiaris OX=9615 GN=MTAP PE=3 SV=3	C_familiaris	3	3	5	3
High	E2QX82	Protocadherin 12 OS=Canis lupus familiaris OX=9615 GN=PCDH12 PE=4 SV=2	C_familiaris	3	4	6	3
High	E2QT84	Beta-ureidopropionase 1 OS=Canis lupus familiaris OX=9615 GN=UPB1 PE=4 SV=1	C_familiaris	3	3	9	3
High	H9GWB5	SRCR domain-containing protein OS=Canis lupus familiaris OX=9615 PE=4 SV=3	C_familiaris	3	3	3	3
High	A0A5F4DIQ4	Superoxide dismutase 3 OS=Canis lupus familiaris OX=9615 GN=SOD3 PE=4 SV=1	C_familiaris	3	3	9	3
High	J9P7R7	Shootin 1 OS=Canis lupus familiaris OX=9615 GN=SHTN1 PE=4 SV=1	C_familiaris	3	4	12	3
High	E2RD95	G protein subunit beta 2 OS=Canis lupus familiaris OX=9615 GN=GNB2 PE=4 SV=1	C_familiaris	6	6	36	3
High	A0A5F4CY61	Uncharacterized protein OS=Canis lupus familiaris OX=9615 PE=4 SV=1	C_familiaris	4	4	26	3
High	E2RKR9	Proteasome subunit beta OS=Canis lupus familiaris OX=9615 GN=PSMB10 PE=3 SV=3	C_familiaris	3	3	13	3
High	A0A5F4CCD0	Cysteine rich secretory protein 2 OS=Canis lupus familiaris OX=9615 GN=CRISP2 PE=4 SV=1	C_familiaris	3	3	9	3
High	A0A5F4CXX0	Reticulon 3 OS=Canis lupus familiaris OX=9615 GN=RTN3 PE=4 SV=1	C_familiaris	3	4	10	3
High	A0A5F4BX14	Mannose-6-phosphate receptor, cation dependent OS=Canis lupus familiaris OX=9615 GN=M6PR PE=4 SV=1	C_familiaris	3	4	16	3
High	A0A5F4C3T9	Phosphatidylcholine transfer protein OS=Canis lupus familiaris OX=9615 GN=PCTP PE=4 SV=1	C_familiaris	3	3	5	3
High	Q5W412	Proteasome subunit beta OS=Canis lupus familiaris OX=9615 GN=PSMB9 PE=3 SV=1	C_familiaris	3	3	28	3
High	A0A5F4DJ87	Prolyl 4-hydroxylase subunit beta OS=Canis lupus familiaris OX=9615 GN=P4HB PE=4 SV=1	C_familiaris	3	3	21	3
High	F1PTZ5	CD44 antigen OS=Canis lupus familiaris OX=9615 GN=CD44 PE=4 SV=3	C_familiaris	3	5	39	3
High	F1PEM7	Insulin like growth factor binding protein 2 OS=Canis lupus familiaris OX=9615 GN=IGFBP2 PE=4 SV=2	C_familiaris	3	3	28	3
High	A0A5F4D061	Solute carrier family 2, facilitated glucose transporter member 3 OS=Canis lupus familiaris OX=9615 GN=SLC2A3 PE=4 SV=1	C_familiaris	3	4	16	3
High	F1PHN8	Serpin family A member 4 OS=Canis lupus familiaris OX=9615 GN=SERPINA4 PE=3 SV=3	C_familiaris	3	3	9	3
High	A0A5F4CZM2	Stromal interaction molecule 1 OS=Canis lupus familiaris OX=9615 GN=STIM1 PE=4 SV=1	C_familiaris	3	3	7	3
High	A0A5F4D2W4	Uncharacterized protein OS=Canis lupus familiaris OX=9615 GN=DLA-79 PE=4 SV=1	C_familiaris	3	3	5	3
High	A0A5F4D8H7	MIA SH3 domain ER export factor 3 OS=Canis lupus familiaris OX=9615 GN=MIA3 PE=4 SV=1	C_familiaris	3	3	10	3
High	F1PMK7	Matrix metallopeptidase 2 OS=Canis lupus familiaris OX=9615 GN=MMP2 PE=3 SV=3	C_familiaris	3	3	7	3
High	F1PJM1	Fibulin 5 OS=Canis lupus familiaris OX=9615 GN=FBLN5 PE=4 SV=2	C_familiaris	3	3	7	3
High	J9PB28	Fibrinogen like 2 OS=Canis lupus familiaris OX=9615 GN=FGL2 PE=4 SV=1	C_familiaris	3	3	6	3
High	E2RKK6	Protein kinase C substrate 80K-H OS=Canis lupus familiaris OX=9615 GN=PRKCSH PE=4 SV=2	C_familiaris	3	3	25	3
High	A0A5F4DBN6	Glutathione-disulfide reductase OS=Canis lupus familiaris OX=9615 GN=GSR PE=4 SV=1	C_familiaris	3	3	18	3
High	E2RPJ4	Glutamate-cysteine ligase catalytic subunit OS=Canis lupus familiaris OX=9615 GN=GCLC PE=4 SV=3	C_familiaris	3	3	4	3
High	L7N0E5	Ig-like domain-containing protein OS=Canis lupus familiaris OX=9615 PE=4 SV=2	C_familiaris	3	3	46	3
High	H9GW63	CS domain-containing protein OS=Canis lupus familiaris OX=9615 GN=LOC608096 PE=4 SV=3	C_familiaris	3	3	6	3
High	A0A5F4D0H5	SRC proto-oncogene, non-receptor tyrosine kinase OS=Canis lupus familiaris OX=9615 GN=SRC PE=4 SV=1	C_familiaris	3	3	34	3
High	F1PEG6	Docking protein 2 OS=Canis lupus familiaris OX=9615 GN=DOK2 PE=4 SV=2	C_familiaris	3	3	12	3
High	F1PAF2	Activating transcription factor 6 OS=Canis lupus familiaris OX=9615 GN=ATF6 PE=4 SV=3	C_familiaris	3	3	15	3
High	F1PDY8	Carbonic anhydrase 2 OS=Canis lupus familiaris OX=9615 GN=CA2 PE=3 SV=3	C_familiaris	3	3	17	3
High	A0A5F4DJ85	Rho GDP dissociation inhibitor alpha OS=Canis lupus familiaris OX=9615 GN=ARHGDIA PE=4 SV=1	C_familiaris	3	3	28	3
High	A0A5F4D168	Serum amyloid A protein OS=Canis lupus familiaris OX=9615 GN=SAA1 PE=4 SV=1	C_familiaris	3	3	8	3
High	F1P983	Protein tyrosine phosphatase receptor type J OS=Canis lupus familiaris OX=9615 GN=PTPRJ PE=4 SV=2	C_familiaris	3	3	15	3
High	F1PD34	Secreted phosphoprotein 2 OS=Canis lupus familiaris OX=9615 GN=SPP2 PE=4 SV=2	C_familiaris	3	3	10	3
High	F1PGR0	ADAM metallopeptidase domain 10 OS=Canis lupus familiaris OX=9615 GN=ADAM10 PE=4 SV=3	C_familiaris	3	3	19	3
High	A0A5F4C654	Protein kinase cAMP-dependent type II regulatory subunit beta OS=Canis lupus familiaris OX=9615 GN=PRKAR2B PE=4 SV=1	C_familiaris	3	4	14	3
High	F1PPH7	Proteasome 26S subunit, ATPase 2 OS=Canis lupus familiaris OX=9615 GN=PSMC2 PE=3 SV=2	C_familiaris	3	3	7	3
High	A0A5F4CA83	LRR binding FLII interacting protein 2 OS=Canis lupus familiaris OX=9615 GN=LRRFIP2 PE=4 SV=1	C_familiaris	4	4	11	3
High	E2R9Y4	Guanylate binding protein family member 6 OS=Canis lupus familiaris OX=9615 GN=GBP6 PE=4 SV=3	C_familiaris	3	3	5	3
High	F1PI70	Transforming growth factor beta OS=Canis lupus familiaris OX=9615 GN=TGFB1 PE=3 SV=2	C_familiaris	3	3	22	3
High	A0A5F4DBF8	ATPase H+ transporting V0 subunit a1 OS=Canis lupus familiaris OX=9615 GN=ATP6V0A1 PE=4 SV=1	C_familiaris	3	3	10	3
High	A0A5F4DCB6	Nucleosome assembly protein 1 like 1 OS=Canis lupus familiaris OX=9615 GN=NAP1L1 PE=4 SV=1	C_familiaris	3	3	17	3
High	F1PDQ2	Dematin actin binding protein OS=Canis lupus familiaris OX=9615 GN=DMTN PE=4 SV=3	C_familiaris	3	3	11	3
High	J9NWI6	Dynactin subunit 1 OS=Canis lupus familiaris OX=9615 GN=DCTN1 PE=4 SV=2	C_familiaris	3	3	8	3
High	F1PIF2	Cathepsin Z OS=Canis lupus familiaris OX=9615 GN=CTSZ PE=3 SV=3	C_familiaris	3	3	30	3
High	F1P6E4	Thromboxane A synthase 1 OS=Canis lupus familiaris OX=9615 GN=TBXAS1 PE=3 SV=3	C_familiaris	3	3	6	3
High	J9P7Y9	Uncharacterized protein OS=Canis lupus familiaris OX=9615 PE=4 SV=2	C_familiaris	4	4	14	3
High	F1PB85	Serpin family A member 7 OS=Canis lupus familiaris OX=9615 GN=SERPINA7 PE=3 SV=2	C_familiaris	3	3	6	3
High	F1Q313	Homogentisate 1,2-dioxygenase OS=Canis lupus familiaris OX=9615 GN=HGD PE=4 SV=2	C_familiaris	3	3	7	3
High	J9P9M0	RAB32, member RAS oncogene family OS=Canis lupus familiaris OX=9615 GN=RAB32 PE=4 SV=2	C_familiaris	3	3	10	3
High	Q28294	Guanine nucleotide-binding protein G(q) subunit alpha OS=Canis lupus familiaris OX=9615 GN=GNAQ PE=2 SV=2	C_familiaris	3	3	11	3
High	E2QV08	Malate dehydrogenase OS=Canis lupus familiaris OX=9615 GN=MDH1 PE=3 SV=3	C_familiaris	3	3	20	3
High	A0A5F4CSM6	Cell division cycle 37 OS=Canis lupus familiaris OX=9615 GN=CDC37 PE=4 SV=1	C_familiaris	3	3	8	3
High	F1PYM4	Insulin like growth factor binding protein acid labile subunit OS=Canis lupus familiaris OX=9615 GN=IGFALS PE=4 SV=2	C_familiaris	3	3	12	3
High	A0A5F4CNX1	AHNAK nucleoprotein OS=Canis lupus familiaris OX=9615 GN=AHNAK PE=4 SV=1	C_familiaris	3	3	7	3
High	F1PGZ1	Beta-1,4-galactosyltransferase 1 OS=Canis lupus familiaris OX=9615 GN=B4GALT1 PE=4 SV=3	C_familiaris	3	3	9	3
High	E2R0B6	Proteasome subunit beta OS=Canis lupus familiaris OX=9615 GN=PSMB6 PE=3 SV=1	C_familiaris	3	3	61	3
High	F6Y713	Alpha-1-acid glycoprotein OS=Canis lupus familiaris OX=9615 GN=LOC100685620 PE=3 SV=1	C_familiaris	3	3	13	3
High	F1PCM9	SH3 domain containing GRB2 like, endophilin B1 OS=Canis lupus familiaris OX=9615 GN=SH3GLB1 PE=4 SV=3	C_familiaris	3	3	21	3
High	E2QWU0	Actin-related protein 2/3 complex subunit 4 OS=Canis lupus familiaris OX=9615 GN=ARPC4 PE=3 SV=3	C_familiaris	3	3	17	3
High	F1PCD8	Laminin subunit beta 1 OS=Canis lupus familiaris OX=9615 GN=LAMB1 PE=4 SV=3	C_familiaris	3	3	4	3
High	A0A5F4C1B3	Transgelin 2 OS=Canis lupus familiaris OX=9615 GN=TAGLN2 PE=4 SV=1	C_familiaris	3	3	15	3
High	E2RH46	Uncharacterized protein OS=Canis lupus familiaris OX=9615 PE=4 SV=3	C_familiaris	3	3	6	3
High	F1PQ46	Anoctamin OS=Canis lupus familiaris OX=9615 GN=ANO6 PE=3 SV=3	C_familiaris	3	3	3	3
High	P56595	Apolipoprotein C-I OS=Canis lupus familiaris OX=9615 GN=APOC1 PE=1 SV=1	C_familiaris	3	3	58	3
High	F1PC59	Peroxiredoxin 6 OS=Canis lupus familiaris OX=9615 GN=PRDX6 PE=4 SV=2	C_familiaris	3	3	4	3
High	A0A5F4CZB6	Acyl-CoA synthetase short chain family member 1 OS=Canis lupus familiaris OX=9615 GN=ACSS1 PE=4 SV=1	C_familiaris	3	3	5	3
High	F1PIT4	Tetraspanin OS=Canis lupus familiaris OX=9615 GN=CD63 PE=3 SV=2	C_familiaris	3	3	6	3
High	F2Z4Q6	Serum albumin OS=Canis lupus familiaris OX=9615 GN=AFP PE=4 SV=2	C_familiaris	52	80	7610	2
High	A0A5F4CA42	Uncharacterized protein OS=Canis lupus familiaris OX=9615 PE=4 SV=1	C_familiaris	10	23	1888	2
High	A0A5F4DDL4	Uncharacterized protein OS=Canis lupus familiaris OX=9615 PE=4 SV=1	C_familiaris	8	20	2178	2
High	A0A5F4C477	Fibulin 1 OS=Canis lupus familiaris OX=9615 GN=FBLN1 PE=4 SV=1	C_familiaris	17	27	422	2
High	F2Z4N7	Actin alpha cardiac muscle 1 OS=Canis lupus familiaris OX=9615 GN=ACTC1 PE=3 SV=2	C_familiaris	15	24	1092	2
High	A0A5F4CE12	Uncharacterized protein OS=Canis lupus familiaris OX=9615 PE=4 SV=1	C_familiaris	7	15	1526	2
High	F1PRR4	Vasodilator-stimulated phosphoprotein OS=Canis lupus familiaris OX=9615 GN=VASP PE=3 SV=1	C_familiaris	14	20	355	2
High	A0A5F4BTN9	Uncharacterized protein OS=Canis lupus familiaris OX=9615 PE=4 SV=1	C_familiaris	6	17	1484	2
High	A0A5F4BWC4	Uncharacterized protein OS=Canis lupus familiaris OX=9615 PE=4 SV=1	C_familiaris	10	32	2106	2
High	J9NYY8	Ig-like domain-containing protein OS=Canis lupus familiaris OX=9615 PE=4 SV=2	C_familiaris	9	32	2264	2
High	A0A5F4CKL2	Uncharacterized protein OS=Canis lupus familiaris OX=9615 PE=4 SV=1	C_familiaris	4	12	874	2
High	A0A5F4D1B8	Uncharacterized protein OS=Canis lupus familiaris OX=9615 PE=4 SV=1	C_familiaris	9	29	2205	2
High	A0A5F4DCX2	Uncharacterized protein OS=Canis lupus familiaris OX=9615 PE=4 SV=1	C_familiaris	4	16	685	2
High	A0A5F4CSF0	Uncharacterized protein OS=Canis lupus familiaris OX=9615 PE=4 SV=1	C_familiaris	9	28	2487	2
High	A0A5F4DJ18	Uncharacterized protein OS=Canis lupus familiaris OX=9615 PE=4 SV=1	C_familiaris	3	15	776	2
High	A0A5F4BR98	Uncharacterized protein OS=Canis lupus familiaris OX=9615 PE=4 SV=1	C_familiaris	9	29	2194	2
High	L7N049	Ig-like domain-containing protein OS=Canis lupus familiaris OX=9615 GN=DLA88 PE=3 SV=2	C_familiaris	11	13	145	2
High	A0A5F4CWK7	Uncharacterized protein OS=Canis lupus familiaris OX=9615 PE=4 SV=1	C_familiaris	4	18	1697	2
High	F1PLR6	Bridging integrator 1 OS=Canis lupus familiaris OX=9615 GN=BIN1 PE=3 SV=3	C_familiaris	15	16	117	2
High	A0A5F4DCD2	Uncharacterized protein OS=Canis lupus familiaris OX=9615 GN=DLA-64 PE=4 SV=1	C_familiaris	9	11	131	2
High	L7N0I0	Ig-like domain-containing protein OS=Canis lupus familiaris OX=9615 PE=4 SV=2	C_familiaris	7	25	1816	2
High	A0A5F4DAX5	Uncharacterized protein OS=Canis lupus familiaris OX=9615 PE=4 SV=1	C_familiaris	3	7	344	2
High	A0A5F4CSP7	Uncharacterized protein OS=Canis lupus familiaris OX=9615 PE=4 SV=1	C_familiaris	3	14	638	2
High	A0A5F4DCA5	Uncharacterized protein OS=Canis lupus familiaris OX=9615 PE=4 SV=1	C_familiaris	5	8	578	2
High	A0A5F4C493	Uncharacterized protein OS=Canis lupus familiaris OX=9615 PE=4 SV=1	C_familiaris	5	13	1083	2
High	A0A5F4C451	Uncharacterized protein OS=Canis lupus familiaris OX=9615 PE=4 SV=1	C_familiaris	3	10	239	2
High	A0A5F4DJC7	Uncharacterized protein OS=Canis lupus familiaris OX=9615 PE=4 SV=1	C_familiaris	10	16	427	2
High	A0A5F4C5A8	Uncharacterized protein OS=Canis lupus familiaris OX=9615 PE=4 SV=1	C_familiaris	8	21	643	2
High	L7N0E8	Ig-like domain-containing protein OS=Canis lupus familiaris OX=9615 PE=4 SV=2	C_familiaris	6	9	182	2
High	F1P634	Myosin light chain 9 OS=Canis lupus familiaris OX=9615 GN=MYL9 PE=4 SV=2	C_familiaris	7	9	79	2
High	J9P3L5	Ig-like domain-containing protein OS=Canis lupus familiaris OX=9615 PE=4 SV=2	C_familiaris	3	7	349	2
High	A0A5F4DFV6	Fc receptor like 4 OS=Canis lupus familiaris OX=9615 GN=FCRL4 PE=4 SV=1	C_familiaris	2	4	113	2
High	J9NRH5	Tyrosine 3-monooxygenase/tryptophan 5-monooxygenase activation protein gamma OS=Canis lupus familiaris OX=9615 GN=YWHAG PE=3 SV=2	C_familiaris	6	8	72	2
High	A0A5F4C4W3	Uncharacterized protein OS=Canis lupus familiaris OX=9615 PE=4 SV=1	C_familiaris	6	6	42	2
High	F1PKN5	Ig-like domain-containing protein OS=Canis lupus familiaris OX=9615 PE=4 SV=3	C_familiaris	2	9	330	2
High	P01785	Ig heavy chain V region MOO OS=Canis lupus familiaris OX=9615 PE=1 SV=1	C_familiaris	2	5	83	2
High	F1Q3Y2	Dihydropyrimidinase like 3 OS=Canis lupus familiaris OX=9615 GN=DPYSL3 PE=4 SV=2	C_familiaris	5	6	24	2
High	A0A5F4CT62	Uncharacterized protein OS=Canis lupus familiaris OX=9615 GN=YWHAQ PE=4 SV=1	C_familiaris	6	9	78	2
High	A0A5F4BU46	Uncharacterized protein OS=Canis lupus familiaris OX=9615 PE=4 SV=1	C_familiaris	3	5	17	2
High	A0A5F4CPW0	Tyrosine 3-monooxygenase/tryptophan 5-monooxygenase activation protein epsilon OS=Canis lupus familiaris OX=9615 GN=YWHAE PE=4 SV=1	C_familiaris	4	5	45	2
High	A0A5F4C8U9	Uncharacterized protein OS=Canis lupus familiaris OX=9615 PE=4 SV=1	C_familiaris	4	4	80	2
High	A0A5F4D071	Uncharacterized protein OS=Canis lupus familiaris OX=9615 PE=4 SV=1	C_familiaris	3	4	453	2
High	F1PL20	Serine incorporator 1 OS=Canis lupus familiaris OX=9615 GN=SERINC1 PE=4 SV=2	C_familiaris	2	2	9	2
High	P01874	Ig mu chain C region OS=Canis lupus familiaris OX=9615 PE=1 SV=1	C_familiaris	3	3	439	2
High	A0A5F4CWQ9	Uncharacterized protein OS=Canis lupus familiaris OX=9615 PE=4 SV=1	C_familiaris	2	2	37	2
High	F1PZA1	Isocitrate dehydrogenase [NADP] OS=Canis lupus familiaris OX=9615 GN=IDH1 PE=2 SV=1	C_familiaris	2	2	21	2
High	E2RGB0	Apolipoprotein C4 OS=Canis lupus familiaris OX=9615 GN=APOC4 PE=4 SV=3	C_familiaris	2	2	30	2
High	A0A5F4DAB6	Protein tyrosine phosphatase non-receptor type 12 OS=Canis lupus familiaris OX=9615 GN=PTPN12 PE=4 SV=1	C_familiaris	2	2	11	2
High	A0A5F4C041	Uncharacterized protein OS=Canis lupus familiaris OX=9615 GN=FOLR2 PE=4 SV=1	C_familiaris	2	2	17	2
High	F1PNV5	Coagulation factor XI OS=Canis lupus familiaris OX=9615 GN=KLKB1 PE=3 SV=3	C_familiaris	5	5	32	2
High	A0A5F4C3J1	Uncharacterized protein OS=Canis lupus familiaris OX=9615 PE=4 SV=1	C_familiaris	5	6	53	2
High	A0A5F4C6X4	Dihydrolipoyl dehydrogenase, mitochondrial OS=Canis lupus familiaris OX=9615 GN=DLD PE=4 SV=1	C_familiaris	2	2	2	2
High	J9PAQ5	Protein S100 OS=Canis lupus familiaris OX=9615 GN=S100A12 PE=3 SV=1	C_familiaris	2	2	3	2
High	A0A5F4DER9	Aquaporin-1 OS=Canis lupus familiaris OX=9615 GN=AQP1 PE=4 SV=1	C_familiaris	2	2	9	2
High	E2RMA7	Dynein cytoplasmic 1 intermediate chain 2 OS=Canis lupus familiaris OX=9615 GN=DYNC1I2 PE=4 SV=3	C_familiaris	2	2	5	2
High	F1PV45	Titin OS=Canis lupus familiaris OX=9615 GN=TTN PE=4 SV=3	C_familiaris	2	2	2	2
High	E2QXS7	Adenosylhomocysteinase OS=Canis lupus familiaris OX=9615 GN=AHCY PE=3 SV=3	C_familiaris	2	2	5	2
High	A0A5F4C634	Sarcoplasmic/endoplasmic reticulum calcium ATPase 2 OS=Canis lupus familiaris OX=9615 GN=ATP2A2 PE=4 SV=1	C_familiaris	4	4	15	2
High	A0A5F4BSL9	Uncharacterized protein OS=Canis lupus familiaris OX=9615 PE=4 SV=1	C_familiaris	3	3	42	2
High	A0A5F4C8J6	Ubiquitin specific peptidase 14 OS=Canis lupus familiaris OX=9615 GN=USP14 PE=4 SV=1	C_familiaris	2	2	12	2
High	F1Q0H0	N(alpha)-acetyltransferase 10, NatA catalytic subunit OS=Canis lupus familiaris OX=9615 GN=NAA10 PE=4 SV=2	C_familiaris	2	2	9	2
High	J9P3J4	Uncharacterized protein OS=Canis lupus familiaris OX=9615 GN=SLC29A1 PE=4 SV=2	C_familiaris	2	2	5	2
High	J9P0D4	Ig-like domain-containing protein OS=Canis lupus familiaris OX=9615 PE=4 SV=2	C_familiaris	3	3	140	2
High	A0A5F4D6V1	Carboxypeptidase B2 OS=Canis lupus familiaris OX=9615 GN=CPB2 PE=4 SV=1	C_familiaris	2	2	5	2
High	F1PHP1	Thioredoxin domain containing 5 OS=Canis lupus familiaris OX=9615 GN=TXNDC5 PE=3 SV=2	C_familiaris	2	2	11	2
High	E2RCI8	Annexin OS=Canis lupus familiaris OX=9615 GN=ANXA6 PE=3 SV=3	C_familiaris	2	2	2	2
High	E2R985	Actin-related protein 2/3 complex subunit 3 OS=Canis lupus familiaris OX=9615 GN=ARPC3 PE=3 SV=3	C_familiaris	2	3	13	2
High	A0A5F4CKY1	A-kinase anchoring protein 12 OS=Canis lupus familiaris OX=9615 GN=AKAP12 PE=4 SV=1	C_familiaris	2	2	3	2
High	F1P9Q2	SH3 domain containing kinase binding protein 1 OS=Canis lupus familiaris OX=9615 GN=SH3KBP1 PE=4 SV=2	C_familiaris	2	2	8	2
High	A0A5F4DBI9	Vesicle associated membrane protein 3 OS=Canis lupus familiaris OX=9615 GN=VAMP3 PE=4 SV=1	C_familiaris	2	2	12	2
High	P18067	Ras-related protein Rab-7a OS=Canis lupus familiaris OX=9615 GN=RAB7A PE=1 SV=1	C_familiaris	2	2	6	2
High	A0A5F4DHM9	Inositol polyphosphate-5-phosphatase D OS=Canis lupus familiaris OX=9615 GN=INPP5D PE=4 SV=1	C_familiaris	2	2	6	2
High	A0A5F4C3F2	Carbonic anhydrase 1 OS=Canis lupus familiaris OX=9615 GN=CA1 PE=4 SV=1	C_familiaris	2	2	9	2
High	F1Q185	Ig-like domain-containing protein OS=Canis lupus familiaris OX=9615 PE=4 SV=3	C_familiaris	2	2	18	2
High	A0A5F4C709	ATP binding cassette subfamily B member 6 OS=Canis lupus familiaris OX=9615 GN=ABCB6 PE=4 SV=1	C_familiaris	2	2	6	2
High	F1PCG4	Peroxiredoxin 2 OS=Canis lupus familiaris OX=9615 GN=PRDX2 PE=4 SV=2	C_familiaris	2	3	27	2
High	F1P9P7	Stromal cell derived factor 4 OS=Canis lupus familiaris OX=9615 GN=SDF4 PE=4 SV=3	C_familiaris	2	2	6	2
High	F1PAK0	Cathepsin S OS=Canis lupus familiaris OX=9615 GN=CTSS PE=3 SV=2	C_familiaris	2	2	10	2
High	E2QZQ9	Activating transcription factor 6 beta OS=Canis lupus familiaris OX=9615 GN=ATF6B PE=4 SV=3	C_familiaris	2	2	11	2
High	F1P8F7	Solute carrier family 16 member 7 OS=Canis lupus familiaris OX=9615 GN=SLC16A7 PE=4 SV=3	C_familiaris	2	2	33	2
High	E2R0M4	N-acetylglucosamine-1-phosphate transferase subunit gamma OS=Canis lupus familiaris OX=9615 GN=GNPTG PE=4 SV=3	C_familiaris	2	2	8	2
High	A0A5F4BSQ8	Karyopherin subunit beta 1 OS=Canis lupus familiaris OX=9615 GN=KPNB1 PE=4 SV=1	C_familiaris	2	2	16	2
High	F6X6J3	ST8 alpha-N-acetyl-neuraminide alpha-2,8-sialyltransferase 4 OS=Canis lupus familiaris OX=9615 GN=ST8SIA4 PE=3 SV=2	C_familiaris	2	2	4	2
High	L7N0E7	Ig-like domain-containing protein OS=Canis lupus familiaris OX=9615 PE=4 SV=2	C_familiaris	2	3	58	2
High	A0A5F4C4Q1	Beta-2-microglobulin OS=Canis lupus familiaris OX=9615 GN=B2M PE=4 SV=1	C_familiaris	2	2	16	2
High	A0A5F4BUK5	Integrin subunit alpha 2 OS=Canis lupus familiaris OX=9615 GN=ITGA2 PE=4 SV=1	C_familiaris	2	2	6	2
High	F1PAL5	Angiotensinogen OS=Canis lupus familiaris OX=9615 GN=AGT PE=3 SV=3	C_familiaris	2	2	12	2
High	P60952	Cell division control protein 42 homolog OS=Canis lupus familiaris OX=9615 GN=CDC42 PE=2 SV=2	C_familiaris	3	3	8	2
High	A0A5F4D491	Dihydrolipoamide S-succinyltransferase OS=Canis lupus familiaris OX=9615 GN=DLST PE=4 SV=1	C_familiaris	2	2	11	2
High	J9NRT0	Alpha-mannosidase OS=Canis lupus familiaris OX=9615 GN=MAN2A1 PE=3 SV=2	C_familiaris	2	2	6	2
High	A0A5F4C8H4	Archain 1 OS=Canis lupus familiaris OX=9615 GN=ARCN1 PE=4 SV=1	C_familiaris	2	2	9	2
High	A0A5F4CAX8	Uncharacterized protein OS=Canis lupus familiaris OX=9615 PE=4 SV=1	C_familiaris	2	2	13	2
High	E2QW61	Lipopolysaccharide binding protein OS=Canis lupus familiaris OX=9615 GN=LBP PE=4 SV=3	C_familiaris	2	2	6	2
High	F1PG69	Collagen type III alpha 1 chain OS=Canis lupus familiaris OX=9615 GN=COL3A1 PE=4 SV=3	C_familiaris	3	3	6	2
High	F1Q260	Lysosomal associated membrane protein 1 OS=Canis lupus familiaris OX=9615 GN=LAMP1 PE=3 SV=3	C_familiaris	2	2	3	2
High	J9NVT2	Hypoxanthine phosphoribosyltransferase OS=Canis lupus familiaris OX=9615 GN=HPRT1 PE=3 SV=1	C_familiaris	2	2	17	2
High	F1PU24	Uncharacterized protein OS=Canis lupus familiaris OX=9615 GN=LOC102153864 PE=4 SV=3	C_familiaris	2	2	6	2
High	A0A5F4D9M4	Uncharacterized protein OS=Canis lupus familiaris OX=9615 GN=ARF3 PE=4 SV=1	C_familiaris	2	2	10	2
High	J9NZ55	Nicotinate-nucleotide pyrophosphorylase [carboxylating] OS=Canis lupus familiaris OX=9615 GN=QPRT PE=3 SV=1	C_familiaris	2	2	4	2
High	J9P988	CD38 molecule OS=Canis lupus familiaris OX=9615 GN=CD38 PE=4 SV=2	C_familiaris	2	2	3	2
High	J9JHP2	Histone H2A OS=Canis lupus familiaris OX=9615 PE=3 SV=2	C_familiaris	2	2	7	2
High	E2R857	Bleomycin hydrolase OS=Canis lupus familiaris OX=9615 GN=BLMH PE=3 SV=1	C_familiaris	2	2	4	2
High	F6X6A0	C-type lectin domain containing 11A OS=Canis lupus familiaris OX=9615 GN=CLEC11A PE=4 SV=2	C_familiaris	2	2	2	2
High	J9P3G1	Lamin B1 OS=Canis lupus familiaris OX=9615 GN=LMNB1 PE=3 SV=2	C_familiaris	3	3	5	2
High	A0A5F4CLF7	Calmodulin 1 OS=Canis lupus familiaris OX=9615 GN=CALM1 PE=4 SV=1	C_familiaris	2	2	4	2
High	A0A5F4CUP0	Poly(A) binding protein cytoplasmic 1 OS=Canis lupus familiaris OX=9615 GN=PABPC1 PE=4 SV=1	C_familiaris	2	2	2	2
High	A0A5F4C9I1	Annexin A2 OS=Canis lupus familiaris OX=9615 GN=ANXA2 PE=4 SV=1	C_familiaris	2	2	8	2
High	A0A5F4CAZ7	Sodium/potassium-transporting ATPase subunit alpha-1 OS=Canis lupus familiaris OX=9615 GN=ATP1A1 PE=4 SV=1	C_familiaris	2	2	10	2
High	E2RBB8	Tyrosine-protein kinase OS=Canis lupus familiaris OX=9615 GN=LYN PE=3 SV=3	C_familiaris	2	2	10	2
High	F1Q4F1	Oxysterol-binding protein OS=Canis lupus familiaris OX=9615 GN=OSBP PE=3 SV=3	C_familiaris	2	2	4	2
High	A0A5F4D8T6	Uncharacterized protein OS=Canis lupus familiaris OX=9615 GN=PAICS PE=4 SV=1	C_familiaris	2	2	5	2
High	P18470	DLA class II histocompatibility antigen, DR-1 beta chain OS=Canis lupus familiaris OX=9615 PE=2 SV=1	C_familiaris	3	4	8	2
High	F1Q2F7	Collagen type VI alpha 5 chain OS=Canis lupus familiaris OX=9615 GN=COL6A5 PE=4 SV=3	C_familiaris	2	2	2	2
High	E2RI17	Sorcin OS=Canis lupus familiaris OX=9615 GN=SRI PE=4 SV=3	C_familiaris	2	2	4	2
High	A0A5F4D856	Proline-serine-threonine phosphatase interacting protein 1 OS=Canis lupus familiaris OX=9615 GN=PSTPIP1 PE=4 SV=1	C_familiaris	2	2	11	2
High	A0A5F4BRK1	Prostaglandin G/H synthase 1 OS=Canis lupus familiaris OX=9615 GN=PTGS1 PE=4 SV=1	C_familiaris	2	2	5	2
High	E2RII4	EMAP like 2 OS=Canis lupus familiaris OX=9615 GN=EML2 PE=4 SV=3	C_familiaris	2	2	6	2
High	A0A5F4CGH7	Protein phosphatase 2 scaffold subunit Aalpha OS=Canis lupus familiaris OX=9615 GN=PPP2R1A PE=4 SV=1	C_familiaris	2	2	4	2
High	F1PR87	Pleckstrin homology domain containing O2 OS=Canis lupus familiaris OX=9615 GN=PLEKHO2 PE=4 SV=2	C_familiaris	2	2	5	2
High	F6Y5Z5	EF-hand calcium binding domain 8 OS=Canis lupus familiaris OX=9615 GN=EFCAB8 PE=4 SV=2	C_familiaris	2	2	3	2
High	F1P914	Uncharacterized protein OS=Canis lupus familiaris OX=9615 GN=MVP PE=4 SV=3	C_familiaris	2	2	2	2
High	E2RSJ3	LIM domain containing preferred translocation partner in lipoma OS=Canis lupus familiaris OX=9615 GN=LPP PE=4 SV=3	C_familiaris	2	2	10	2
High	J9P749	Tight junction protein ZO-2 OS=Canis lupus familiaris OX=9615 GN=TJP2 PE=3 SV=2	C_familiaris	2	2	6	2
High	F6XYK7	Adducin 2 OS=Canis lupus familiaris OX=9615 GN=ADD2 PE=4 SV=1	C_familiaris	2	2	5	2
High	J9P7X2	Ig-like domain-containing protein OS=Canis lupus familiaris OX=9615 GN=THY1 PE=4 SV=1	C_familiaris	2	2	17	2
High	F1Q3Z2	Murine retrovirus integration site 1 homolog OS=Canis lupus familiaris OX=9615 GN=MRVI1 PE=4 SV=3	C_familiaris	2	2	7	2
High	E2QYN4	ATP synthase inhibitory factor subunit 1 OS=Canis lupus familiaris OX=9615 GN=ATP5IF1 PE=4 SV=1	C_familiaris	2	2	18	2
High	F1PB66	Tetraspanin OS=Canis lupus familiaris OX=9615 GN=CD81 PE=3 SV=2	C_familiaris	2	2	10	2
High	F1PIV8	EF-hand domain family member D2 OS=Canis lupus familiaris OX=9615 GN=EFHD2 PE=4 SV=3	C_familiaris	2	2	5	2
High	E2REP3	Matrix Gla protein OS=Canis lupus familiaris OX=9615 GN=MGP PE=4 SV=3	C_familiaris	2	2	7	2
High	A0A5F4DFK8	Aconitase 2 OS=Canis lupus familiaris OX=9615 GN=ACO2 PE=4 SV=1	C_familiaris	2	2	8	2
High	F1PQ91	Insulin like growth factor binding protein 3 OS=Canis lupus familiaris OX=9615 GN=IGFBP3 PE=4 SV=2	C_familiaris	2	2	16	2
High	E2QVU9	Biliverdin reductase B OS=Canis lupus familiaris OX=9615 GN=BLVRB PE=4 SV=1	C_familiaris	2	2	4	2
High	J9PBE6	Glutamic--pyruvic transaminase OS=Canis lupus familiaris OX=9615 GN=GPT PE=4 SV=2	C_familiaris	2	2	6	2
High	F1P795	RAS guanyl releasing protein 2 OS=Canis lupus familiaris OX=9615 GN=RASGRP2 PE=4 SV=2	C_familiaris	2	2	4	2
High	F6V5M4	Nuclear distribution C, dynein complex regulator OS=Canis lupus familiaris OX=9615 GN=NUDC PE=4 SV=1	C_familiaris	2	2	9	2
High	E2R034	Molybdopterin molybdenumtransferase OS=Canis lupus familiaris OX=9615 GN=GPHN PE=3 SV=2	C_familiaris	2	2	2	2
High	A0A5F4CE41	Uncharacterized protein OS=Canis lupus familiaris OX=9615 PE=4 SV=1	C_familiaris	2	2	9	2
High	A0A5F4CPQ6	Chaperonin containing TCP1 subunit 8 OS=Canis lupus familiaris OX=9615 GN=CCT8 PE=4 SV=1	C_familiaris	2	2	3	2
High	E2R7T5	Arachidonate 15-lipoxygenase OS=Canis lupus familiaris OX=9615 GN=ALOX15 PE=3 SV=3	C_familiaris	2	2	3	2
High	A0A5F4CYD3	Coenzyme Q10B OS=Canis lupus familiaris OX=9615 GN=COQ10B PE=4 SV=1	C_familiaris	2	2	3	2
High	J9P4I5	Nucleoside diphosphate kinase OS=Canis lupus familiaris OX=9615 PE=3 SV=2	C_familiaris	2	2	7	2
High	J9P3H7	UBA domain-containing protein OS=Canis lupus familiaris OX=9615 GN=DDI2 PE=4 SV=2	C_familiaris	2	2	5	2
High	J9NTG7	CD55 molecule OS=Canis lupus familiaris OX=9615 GN=CD55 PE=4 SV=2	C_familiaris	2	2	5	2
High	F1PE09	6-phosphogluconate dehydrogenase, decarboxylating OS=Canis lupus familiaris OX=9615 GN=PGD PE=3 SV=3	C_familiaris	2	2	3	2
High	A0A5F4D2Z7	Casein kinase 1 gamma 1 OS=Canis lupus familiaris OX=9615 GN=CSNK1G1 PE=4 SV=1	C_familiaris	2	2	5	2
High	E2R6K5	Histone H3 OS=Canis lupus familiaris OX=9615 GN=GALK1 PE=3 SV=1	C_familiaris	2	2	14	2
High	E2RIF3	Transgelin OS=Canis lupus familiaris OX=9615 GN=TAGLN PE=3 SV=2	C_familiaris	2	2	3	2
High	J9NST4	SelP_N domain-containing protein OS=Canis lupus familiaris OX=9615 GN=SELENOP PE=4 SV=2	C_familiaris	2	2	6	2
High	P62825	GTP-binding nuclear protein Ran OS=Canis lupus familiaris OX=9615 GN=RAN PE=1 SV=3	C_familiaris	2	2	7	2
High	E2RKJ1	Cell cycle and apoptosis regulator 2 OS=Canis lupus familiaris OX=9615 GN=CCAR2 PE=4 SV=2	C_familiaris	2	2	2	2
High	A0A5F4D0M8	Calpain 5 OS=Canis lupus familiaris OX=9615 GN=CAPN5 PE=4 SV=1	C_familiaris	2	2	3	2
High	F1PPE5	Biorientation of chromosomes in cell division 1 like 1 OS=Canis lupus familiaris OX=9615 GN=BOD1L1 PE=4 SV=3	C_familiaris	2	2	2	2
High	F1PVP6	Uncharacterized protein OS=Canis lupus familiaris OX=9615 GN=CGREF1 PE=4 SV=2	C_familiaris	2	2	2	2
High	A0A5F4BRV8	Uncharacterized protein OS=Canis lupus familiaris OX=9615 GN=VIM PE=4 SV=1	C_familiaris	2	2	2	2
High	A0A5F4DLF5	Titin OS=Canis lupus familiaris OX=9615 GN=TTN PE=4 SV=1	C_familiaris	2	2	4	2
High	A0A5F4DNE9	Fibronectin OS=Canis lupus familiaris OX=9615 GN=FN1 PE=4 SV=1	C_familiaris	112	367	14606	1
High	Q28275	Fibronectin (Fragment) OS=Canis lupus familiaris OX=9615 GN=FN1 PE=2 SV=3	C_familiaris	59	191	2908	1
High	E2RCC8	Uncharacterized protein OS=Canis lupus familiaris OX=9615 PE=4 SV=3	C_familiaris	34	80	12593	1
High	A0A5F4CIZ1	Uncharacterized protein OS=Canis lupus familiaris OX=9615 PE=4 SV=1	C_familiaris	32	76	12389	1
High	Z4YHI2	Uncharacterized protein OS=Canis lupus familiaris OX=9615 GN=ACTG1 PE=3 SV=2	C_familiaris	23	44	1806	1
High	O18840	Actin, cytoplasmic 1 OS=Canis lupus familiaris OX=9615 GN=ACTB PE=2 SV=3	C_familiaris	23	44	1840	1
High	A0A5F4C2N3	Kininogen 1 OS=Canis lupus familiaris OX=9615 GN=KNG1 PE=4 SV=1	C_familiaris	20	27	683	1
High	L7N0F1	Ig-like domain-containing protein OS=Canis lupus familiaris OX=9615 GN=LOC100687054 PE=4 SV=1	C_familiaris	8	13	4397	1
High	A0A5F4C335	Uncharacterized protein OS=Canis lupus familiaris OX=9615 PE=4 SV=1	C_familiaris	6	17	1409	1
High	J9P7A6	Uncharacterized protein OS=Canis lupus familiaris OX=9615 GN=ALDOA PE=4 SV=2	C_familiaris	17	22	410	1
High	E2R5R9	UTP--glucose-1-phosphate uridylyltransferase OS=Canis lupus familiaris OX=9615 GN=UGP2 PE=3 SV=3	C_familiaris	17	22	159	1
High	P50551	Vasodilator-stimulated phosphoprotein OS=Canis lupus familiaris OX=9615 GN=VASP PE=1 SV=3	C_familiaris	13	16	336	1
High	F1Q0R0	IF rod domain-containing protein OS=Canis lupus familiaris OX=9615 GN=KRT14 PE=3 SV=3	C_familiaris	19	25	294	1
High	F1Q1Q8	UTP--glucose-1-phosphate uridylyltransferase OS=Canis lupus familiaris OX=9615 GN=UGP2 PE=3 SV=3	C_familiaris	17	21	146	1
High	A0A5F4D8U5	Actin beta like 2 OS=Canis lupus familiaris OX=9615 GN=ACTBL2 PE=4 SV=1	C_familiaris	10	16	833	1
High	A0A5F4BPQ0	Mannan binding lectin serine peptidase 1 OS=Canis lupus familiaris OX=9615 GN=MASP1 PE=4 SV=1	C_familiaris	14	16	456	1
High	A0A5F4D3E6	Uncharacterized protein OS=Canis lupus familiaris OX=9615 PE=4 SV=1	C_familiaris	6	14	1052	1
High	A0A5F4DJA2	Uncharacterized protein OS=Canis lupus familiaris OX=9615 GN=DLA-64 PE=4 SV=1	C_familiaris	10	12	153	1
High	A0A5F4DC86	Actinin alpha 4 OS=Canis lupus familiaris OX=9615 GN=ACTN4 PE=4 SV=1	C_familiaris	18	19	169	1
High	A0A5F4D0K4	Bridging integrator 2 OS=Canis lupus familiaris OX=9615 GN=BIN2 PE=4 SV=1	C_familiaris	14	16	222	1
High	A0A5F4CHP9	Bridging integrator 1 OS=Canis lupus familiaris OX=9615 GN=BIN1 PE=4 SV=1	C_familiaris	14	15	112	1
High	A0A5F4DI88	Peroxiredoxin 4 OS=Canis lupus familiaris OX=9615 GN=PRDX4 PE=4 SV=1	C_familiaris	9	11	262	1
High	P18466	DLA class I histocompatibility antigen, A9/A9 alpha chain OS=Canis lupus familiaris OX=9615 PE=2 SV=1	C_familiaris	9	11	133	1
High	A0A5F4BTM1	Uncharacterized protein OS=Canis lupus familiaris OX=9615 PE=4 SV=1	C_familiaris	10	16	532	1
High	J9NXL3	GLOBIN domain-containing protein OS=Canis lupus familiaris OX=9615 GN=LOC100855540 PE=3 SV=2	C_familiaris	8	8	238	1
High	P60529	Hemoglobin subunit alpha OS=Canis lupus familiaris OX=9615 GN=HBA PE=1 SV=1	C_familiaris	8	8	231	1
High	A0A5F4BRE0	Tropomyosin 3 OS=Canis lupus familiaris OX=9615 GN=TPM3 PE=4 SV=1	C_familiaris	14	15	111	1
High	J9P1M7	Ig-like domain-containing protein OS=Canis lupus familiaris OX=9615 PE=4 SV=2	C_familiaris	5	14	1104	1
High	A0A5F4CI22	Uncharacterized protein OS=Canis lupus familiaris OX=9615 PE=4 SV=1	C_familiaris	6	23	1706	1
High	A0A5F4D0P1	Protein 4.1 OS=Canis lupus familiaris OX=9615 GN=EPB41 PE=4 SV=1	C_familiaris	10	13	77	1
High	Q6Q7P4	Protein 4.1 OS=Canis lupus familiaris OX=9615 GN=EPB41 PE=2 SV=1	C_familiaris	10	14	81	1
High	A0A5F4CQG9	Uncharacterized protein OS=Canis lupus familiaris OX=9615 PE=4 SV=1	C_familiaris	6	23	1701	1
High	A0A5F4CLB9	Uncharacterized protein OS=Canis lupus familiaris OX=9615 PE=4 SV=1	C_familiaris	4	7	1070	1
High	A0A5F4DCY9	Uncharacterized protein OS=Canis lupus familiaris OX=9615 PE=4 SV=1	C_familiaris	5	11	1116	1
High	H9GWR0	Ig-like domain-containing protein OS=Canis lupus familiaris OX=9615 PE=4 SV=3	C_familiaris	5	11	1114	1
High	A0A5F4DCE0	Tropomyosin 1 OS=Canis lupus familiaris OX=9615 GN=TPM1 PE=4 SV=1	C_familiaris	10	10	93	1
High	A0A5F4CRU2	Uncharacterized protein OS=Canis lupus familiaris OX=9615 PE=4 SV=1	C_familiaris	6	17	1158	1
High	A0A5F4CI17	Uncharacterized protein OS=Canis lupus familiaris OX=9615 PE=4 SV=1	C_familiaris	2	6	251	1
High	E2QZT7	14_3_3 domain-containing protein OS=Canis lupus familiaris OX=9615 PE=3 SV=2	C_familiaris	4	8	86	1
High	E2RGQ8	Ig-like domain-containing protein OS=Canis lupus familiaris OX=9615 PE=4 SV=3	C_familiaris	5	10	166	1
High	A0A5F4DGR2	Uncharacterized protein OS=Canis lupus familiaris OX=9615 PE=4 SV=1	C_familiaris	1	6	122	1
High	A0A5F4DCG3	Uncharacterized protein OS=Canis lupus familiaris OX=9615 PE=4 SV=1	C_familiaris	2	9	639	1
High	A0A5F4C4S7	Uncharacterized protein OS=Canis lupus familiaris OX=9615 PE=4 SV=1	C_familiaris	6	18	132	1
High	A0A5F4BUM4	Uncharacterized protein OS=Canis lupus familiaris OX=9615 PE=4 SV=1	C_familiaris	1	2	90	1
High	E2RF52	Proteasome subunit alpha type OS=Canis lupus familiaris OX=9615 GN=PSMA8 PE=3 SV=2	C_familiaris	4	4	117	1
High	A0A5F4CUN8	RAB1B, member RAS oncogene family OS=Canis lupus familiaris OX=9615 GN=RAB1B PE=4 SV=1	C_familiaris	5	6	46	1
High	J9P540	Glyceraldehyde-3-phosphate dehydrogenase OS=Canis lupus familiaris OX=9615 GN=LOC477441 PE=3 SV=1	C_familiaris	5	6	61	1
High	A0A5F4D567	Uncharacterized protein OS=Canis lupus familiaris OX=9615 PE=4 SV=1	C_familiaris	8	8	106	1
High	F1PFK0	Twinfilin actin binding protein 1 OS=Canis lupus familiaris OX=9615 GN=TWF1 PE=4 SV=2	C_familiaris	6	6	36	1
High	L7N050	Heat shock protein family A (Hsp70) member 1 like OS=Canis lupus familiaris OX=9615 GN=HSPA1L PE=3 SV=2	C_familiaris	5	6	138	1
High	L7N0J0	Ig-like domain-containing protein OS=Canis lupus familiaris OX=9615 PE=4 SV=2	C_familiaris	2	6	383	1
High	F1PCH3	Enolase 1 OS=Canis lupus familiaris OX=9615 GN=ENO1 PE=3 SV=3	C_familiaris	5	5	31	1
High	J9NRP8	Twinfilin actin binding protein 1 OS=Canis lupus familiaris OX=9615 GN=TWF1 PE=4 SV=2	C_familiaris	6	6	25	1
High	F1PLM3	Tubulin alpha chain OS=Canis lupus familiaris OX=9615 PE=3 SV=2	C_familiaris	5	6	84	1
High	A0A5F4D172	Uncharacterized protein OS=Canis lupus familiaris OX=9615 PE=4 SV=1	C_familiaris	1	4	355	1
High	A0A5F4DMU9	Drebrin like OS=Canis lupus familiaris OX=9615 GN=DBNL PE=4 SV=1	C_familiaris	4	4	35	1
High	A0A5F4BQS4	Drebrin like OS=Canis lupus familiaris OX=9615 GN=DBNL PE=4 SV=1	C_familiaris	4	4	55	1
High	E2RRC6	Radixin OS=Canis lupus familiaris OX=9615 GN=RDX PE=4 SV=2	C_familiaris	6	7	47	1
High	A0A5F4BUK3	Uncharacterized protein OS=Canis lupus familiaris OX=9615 PE=4 SV=1	C_familiaris	3	13	89	1
High	J9P6S8	Histone H2B OS=Canis lupus familiaris OX=9615 GN=HIST1H2BK PE=3 SV=1	C_familiaris	2	4	7	1
High	P62822	Ras-related protein Rab-1A OS=Canis lupus familiaris OX=9615 GN=RAB1A PE=1 SV=3	C_familiaris	5	5	42	1
High	P12800	Fibrinogen gamma chain (Fragment) OS=Canis lupus familiaris OX=9615 GN=FGG PE=1 SV=1	C_familiaris	2	4	570	1
High	E2R9U8	Eukaryotic translation elongation factor 1 delta OS=Canis lupus familiaris OX=9615 GN=EEF1D PE=3 SV=3	C_familiaris	1	2	20	1
High	E2R8C5	Ig-like domain-containing protein OS=Canis lupus familiaris OX=9615 PE=4 SV=2	C_familiaris	1	3	156	1
High	F2Z4P9	Ras-related protein Rab-10 OS=Canis lupus familiaris OX=9615 GN=RAB10 PE=4 SV=1	C_familiaris	3	3	33	1
High	J9NWZ6	Glyceraldehyde-3-phosphate dehydrogenase OS=Canis lupus familiaris OX=9615 GN=LOC106558049 PE=3 SV=1	C_familiaris	2	4	55	1
High	A0A5F4BZA4	Microfibril associated protein 4 OS=Canis lupus familiaris OX=9615 GN=MFAP4 PE=4 SV=1	C_familiaris	1	1	16	1
High	P61007	Ras-related protein Rab-8A OS=Canis lupus familiaris OX=9615 GN=RAB8A PE=1 SV=1	C_familiaris	3	3	36	1
High	J9P5F1	USO1 vesicle transport factor OS=Canis lupus familiaris OX=9615 GN=USO1 PE=4 SV=2	C_familiaris	1	2	11	1
High	E2QWB2	Plastin 1 OS=Canis lupus familiaris OX=9615 GN=PLS1 PE=4 SV=2	C_familiaris	3	3	18	1
High	A0A5F4D946	Uncharacterized protein OS=Canis lupus familiaris OX=9615 PE=4 SV=1	C_familiaris	2	4	222	1
High	A0A5F4D9C3	Enah/Vasp-like OS=Canis lupus familiaris OX=9615 GN=EVL PE=4 SV=1	C_familiaris	2	2	30	1
High	A0A5F4CMZ1	Uncharacterized protein OS=Canis lupus familiaris OX=9615 PE=4 SV=1	C_familiaris	1	2	21	1
High	A0A5F4BR24	Uncharacterized protein OS=Canis lupus familiaris OX=9615 PE=4 SV=1	C_familiaris	2	3	15	1
High	E2RRT3	RAB8B, member RAS oncogene family OS=Canis lupus familiaris OX=9615 GN=RAB8B PE=4 SV=3	C_familiaris	2	2	25	1
High	E2RKR1	Keratin 20 OS=Canis lupus familiaris OX=9615 GN=KRT20 PE=3 SV=2	C_familiaris	3	3	18	1
High	A0A5F4D8P8	Isocitrate dehydrogenase (NADP(+)) 2, mitochondrial OS=Canis lupus familiaris OX=9615 GN=IDH2 PE=4 SV=1	C_familiaris	1	1	14	1
High	E2QYS4	Pantetheinase OS=Canis lupus familiaris OX=9615 GN=VNN1 PE=4 SV=3	C_familiaris	1	1	3	1
High	J9P095	Stanniocalcin 2 OS=Canis lupus familiaris OX=9615 GN=STC2 PE=4 SV=1	C_familiaris	1	1	12	1
High	F6V0D8	Chaperonin containing TCP1 subunit 2 OS=Canis lupus familiaris OX=9615 GN=CCT2 PE=3 SV=2	C_familiaris	1	2	6	1
High	A0A5F4CYS8	Uncharacterized protein OS=Canis lupus familiaris OX=9615 PE=4 SV=1	C_familiaris	1	1	5	1
High	A0A5F4CGR9	Uncharacterized protein OS=Canis lupus familiaris OX=9615 PE=4 SV=1	C_familiaris	1	2	123	1
High	A0A5F4CE93	Uncharacterized protein OS=Canis lupus familiaris OX=9615 PE=4 SV=1	C_familiaris	1	2	141	1
High	Q3BCQ5	Ammonium transporter Rh type A OS=Canis lupus familiaris OX=9615 GN=RHAG PE=2 SV=1	C_familiaris	1	2	8	1
High	E2R761	L-lactate dehydrogenase OS=Canis lupus familiaris OX=9615 GN=LDHB PE=3 SV=1	C_familiaris	2	2	33	1
High	J9NYK7	Uncharacterized protein OS=Canis lupus familiaris OX=9615 GN=MYADM PE=4 SV=1	C_familiaris	1	1	2	1
High	A0A5F4D5F0	Uncharacterized protein OS=Canis lupus familiaris OX=9615 PE=4 SV=1	C_familiaris	2	3	7	1
High	A0A5F4C9H9	Uncharacterized protein OS=Canis lupus familiaris OX=9615 PE=4 SV=1	C_familiaris	1	2	29	1
High	F1P8F6	Syntaxin 11 OS=Canis lupus familiaris OX=9615 GN=STX11 PE=3 SV=3	C_familiaris	1	1	2	1
High	A0A5F4C8U2	Major histocompatibility complex, class II, DQ beta 2 OS=Canis lupus familiaris OX=9615 GN=HLA-DQB2 PE=4 SV=1	C_familiaris	2	3	6	1
High	J9NTR8	Eukaryotic translation initiation factor 3 subunit H OS=Canis lupus familiaris OX=9615 GN=EIF3H PE=3 SV=2	C_familiaris	1	1	9	1
High	J9NZQ3	V-type proton ATPase subunit G OS=Canis lupus familiaris OX=9615 PE=3 SV=2	C_familiaris	1	1	4	1
High	F6XYD3	FYN binding protein 1 OS=Canis lupus familiaris OX=9615 GN=FYB1 PE=4 SV=2	C_familiaris	1	2	18	1
High	A0A5F4DDJ9	Kinesin family member 5B OS=Canis lupus familiaris OX=9615 GN=KIF5B PE=4 SV=1	C_familiaris	1	1	7	1
High	F1Q4F9	Metalloproteinase inhibitor 2 OS=Canis lupus familiaris OX=9615 GN=TIMP2 PE=4 SV=3	C_familiaris	1	2	8	1
High	E2R478	Neuronal pentraxin 1 OS=Canis lupus familiaris OX=9615 GN=NPTX1 PE=4 SV=1	C_familiaris	1	1	10	1
High	E2R7N6	Cell adhesion molecule L1 like OS=Canis lupus familiaris OX=9615 GN=CHL1 PE=4 SV=2	C_familiaris	1	1	3	1
High	A0A5F4CZ04	Oxidation resistance 1 OS=Canis lupus familiaris OX=9615 GN=OXR1 PE=4 SV=1	C_familiaris	1	1	6	1
High	J9PBH6	Dynein light intermediate chain OS=Canis lupus familiaris OX=9615 GN=DYNC1LI2 PE=3 SV=2	C_familiaris	1	1	4	1
High	A0A5F4D804	Voltage dependent anion channel 2 OS=Canis lupus familiaris OX=9615 GN=VDAC2 PE=4 SV=1	C_familiaris	1	1	9	1
High	P51147	Ras-related protein Rab-5C OS=Canis lupus familiaris OX=9615 GN=RAB5C PE=2 SV=1	C_familiaris	2	2	12	1
High	A0A5F4CLT9	Uncharacterized protein OS=Canis lupus familiaris OX=9615 GN=SDCBP PE=4 SV=1	C_familiaris	1	1	8	1
High	A0A5F4DBR8	TNF receptor associated protein 1 OS=Canis lupus familiaris OX=9615 GN=TRAP1 PE=4 SV=1	C_familiaris	2	2	27	1
High	A0A5F4CLX4	Uncharacterized protein OS=Canis lupus familiaris OX=9615 PE=4 SV=1	C_familiaris	2	3	187	1
High	J9NVY4	Lysyl oxidase like 1 OS=Canis lupus familiaris OX=9615 GN=LOXL1 PE=4 SV=2	C_familiaris	1	1	2	1
High	A0A5F4DID6	Uncharacterized protein OS=Canis lupus familiaris OX=9615 PE=4 SV=1	C_familiaris	1	1	2	1
High	E2R431	S-adenosylmethionine synthase OS=Canis lupus familiaris OX=9615 GN=MAT2A PE=3 SV=2	C_familiaris	1	1	2	1
High	F1PCR0	Microsomal glutathione S-transferase 3 OS=Canis lupus familiaris OX=9615 GN=MGST3 PE=4 SV=2	C_familiaris	1	1	11	1
High	A0A5F4CTX6	Uncharacterized protein OS=Canis lupus familiaris OX=9615 GN=CDH2 PE=4 SV=1	C_familiaris	1	1	2	1
High	A0A5F4DF61	Insulin like growth factor 2 OS=Canis lupus familiaris OX=9615 GN=IGF2 PE=4 SV=1	C_familiaris	1	1	4	1
High	F1PGX1	Desmoglein-3 OS=Canis lupus familiaris OX=9615 GN=DSG2 PE=4 SV=2	C_familiaris	1	1	3	1
High	A0A5F4DI47	Septin 11 OS=Canis lupus familiaris OX=9615 GN=SEPTIN11 PE=4 SV=1	C_familiaris	3	3	10	1
High	A0A5F4DHX6	Uncharacterized protein OS=Canis lupus familiaris OX=9615 GN=NPM1 PE=4 SV=1	C_familiaris	1	1	2	1
High	F1PRC5	Aamy domain-containing protein OS=Canis lupus familiaris OX=9615 GN=SLC3A2 PE=4 SV=2	C_familiaris	1	1	11	1
High	F1P699	Phosphatidylethanolamine-binding protein 1 OS=Canis lupus familiaris OX=9615 GN=PEBP1 PE=4 SV=3	C_familiaris	1	1	5	1
High	E2RP68	S_100 domain-containing protein OS=Canis lupus familiaris OX=9615 GN=S100A5 PE=4 SV=2	C_familiaris	1	3	9	1
High	F1Q0K5	Triokinase and FMN cyclase OS=Canis lupus familiaris OX=9615 GN=TKFC PE=4 SV=2	C_familiaris	1	1	11	1
High	A0A5F4D9N0	LIM domain binding 3 OS=Canis lupus familiaris OX=9615 GN=LDB3 PE=4 SV=1	C_familiaris	1	1	1	1
High	E2RPP4	CDC42 binding protein kinase beta OS=Canis lupus familiaris OX=9615 GN=CDC42BPB PE=3 SV=3	C_familiaris	1	1	3	1
High	F1PUX4	60S acidic ribosomal protein P0 OS=Canis lupus familiaris OX=9615 GN=RPLP0 PE=3 SV=1	C_familiaris	1	1	6	1
High	J9P2G8	Uncharacterized protein OS=Canis lupus familiaris OX=9615 GN=SHPK PE=4 SV=1	C_familiaris	1	1	5	1
High	F1PUI4	Serpin family E member 1 OS=Canis lupus familiaris OX=9615 GN=SERPINE1 PE=3 SV=3	C_familiaris	1	1	3	1
High	A0A5F4CFF9	Fms related tyrosine kinase 4 OS=Canis lupus familiaris OX=9615 GN=FLT4 PE=4 SV=1	C_familiaris	1	1	2	1
High	E2QX78	Solute carrier family 43 member 3 OS=Canis lupus familiaris OX=9615 GN=SLC43A3 PE=4 SV=1	C_familiaris	1	1	10	1
High	A0A5F4D2Z2	Adaptor related protein complex 2 subunit beta 1 OS=Canis lupus familiaris OX=9615 GN=AP2B1 PE=4 SV=1	C_familiaris	1	1	5	1
High	E2R1Y6	Secreted phosphoprotein 1 OS=Canis lupus familiaris OX=9615 GN=SPP1 PE=4 SV=3	C_familiaris	1	1	1	1
High	A0A5F4D844	Adhesion G protein-coupled receptor E5 OS=Canis lupus familiaris OX=9615 GN=ADGRE5 PE=4 SV=1	C_familiaris	1	1	3	1
High	F1Q154	Carnitine palmitoyltransferase 2 OS=Canis lupus familiaris OX=9615 GN=CPT2 PE=3 SV=3	C_familiaris	1	1	2	1
High	A0A5F4DEG2	Neurobeachin OS=Canis lupus familiaris OX=9615 GN=NBEA PE=4 SV=1	C_familiaris	1	1	2	1
High	F6V440	Serglycin (Fragment) OS=Canis lupus familiaris OX=9615 GN=SRGN PE=4 SV=2	C_familiaris	1	1	2	1
High	A0A5F4BP76	Aldehyde dehydrogenase 9 family member A1 OS=Canis lupus familiaris OX=9615 GN=ALDH9A1 PE=4 SV=1	C_familiaris	1	1	3	1
High	A0A5F4DDV1	Periostin OS=Canis lupus familiaris OX=9615 GN=POSTN PE=4 SV=1	C_familiaris	1	1	9	1
High	A0A5F4DFS0	RAB5B, member RAS oncogene family OS=Canis lupus familiaris OX=9615 GN=RAB5B PE=4 SV=1	C_familiaris	2	2	13	1
High	A0A5F4DKT1	Proprotein convertase subtilisin/kexin type 6 OS=Canis lupus familiaris OX=9615 GN=PCSK6 PE=4 SV=1	C_familiaris	1	1	1	1
High	A0A5F4C7T3	Procollagen C-endopeptidase enhancer OS=Canis lupus familiaris OX=9615 GN=PCOLCE PE=4 SV=1	C_familiaris	1	1	2	1
High	E2R0K4	RAB14, member RAS oncogene family OS=Canis lupus familiaris OX=9615 GN=RAB14 PE=4 SV=1	C_familiaris	2	2	24	1
High	E2RR46	Aminopeptidase like 1 OS=Canis lupus familiaris OX=9615 GN=NPEPL1 PE=4 SV=2	C_familiaris	1	1	4	1
High	P63091	Guanine nucleotide-binding protein G(s) subunit alpha OS=Canis lupus familiaris OX=9615 GN=GNAS PE=2 SV=1	C_familiaris	2	2	11	1
High	F1PV92	Citrate synthase OS=Canis lupus familiaris OX=9615 GN=CS PE=3 SV=3	C_familiaris	1	1	3	1
High	J9NSQ4	Regulator of G protein signaling 10 OS=Canis lupus familiaris OX=9615 GN=RGS10 PE=4 SV=2	C_familiaris	1	1	2	1
High	F1PEZ5	Laminin subunit alpha 2 OS=Canis lupus familiaris OX=9615 GN=LAMA2 PE=4 SV=3	C_familiaris	1	1	2	1
High	F1Q424	60S ribosomal protein L6 OS=Canis lupus familiaris OX=9615 GN=RPL6 PE=3 SV=1	C_familiaris	1	1	1	1
High	J9P1I7	Collagen type X alpha 1 chain OS=Canis lupus familiaris OX=9615 GN=COL10A1 PE=4 SV=2	C_familiaris	1	1	2	1
High	F1PVV5	Clathrin interactor 1 OS=Canis lupus familiaris OX=9615 GN=CLINT1 PE=4 SV=3	C_familiaris	1	1	5	1
High	F1PLY9	Lipocln_cytosolic_FA-bd_dom domain-containing protein OS=Canis lupus familiaris OX=9615 PE=3 SV=3	C_familiaris	1	2	2	1
High	A0A5F4CEA8	Uncharacterized protein OS=Canis lupus familiaris OX=9615 PE=4 SV=1	C_familiaris	1	1	1	1
High	E2RP65	Ig-like domain-containing protein OS=Canis lupus familiaris OX=9615 GN=LOC100856270 PE=4 SV=1	C_familiaris	1	1	3	1
High	F1PEQ5	Insulin like growth factor binding protein 5 OS=Canis lupus familiaris OX=9615 GN=IGFBP5 PE=4 SV=3	C_familiaris	1	1	3	1
High	E2RM61	Proteasome 26S subunit, ATPase 5 OS=Canis lupus familiaris OX=9615 GN=PSMC5 PE=4 SV=3	C_familiaris	1	1	1	1
High	E2RAL0	Rho GDP dissociation inhibitor beta OS=Canis lupus familiaris OX=9615 GN=ARHGDIB PE=4 SV=1	C_familiaris	1	1	1	1
High	F1Q0B2	MOB kinase activator 1B OS=Canis lupus familiaris OX=9615 GN=MOB1B PE=4 SV=3	C_familiaris	1	1	3	1
High	J9NSY4	C1q and TNF related 5 OS=Canis lupus familiaris OX=9615 GN=C1QTNF5 PE=4 SV=2	C_familiaris	1	1	4	1
High	F6X870	Peptidylglycine alpha-amidating monooxygenase OS=Canis lupus familiaris OX=9615 GN=PAM PE=4 SV=2	C_familiaris	1	1	2	1
High	E2QUE1	Poly(rC) binding protein 3 OS=Canis lupus familiaris OX=9615 GN=PCBP3 PE=4 SV=3	C_familiaris	2	2	7	1
High	F1PDJ7	Ig-like domain-containing protein OS=Canis lupus familiaris OX=9615 GN=AZGP1 PE=3 SV=2	C_familiaris	1	1	4	1
High	Q60FC1	Angiopoietin-1 OS=Canis lupus familiaris OX=9615 GN=ANGPT1 PE=2 SV=1	C_familiaris	1	1	3	1
High	A0A5F4BR75	Uncharacterized protein OS=Canis lupus familiaris OX=9615 PE=4 SV=1	C_familiaris	1	1	1	1
High	J9P6K0	RAP2A, member of RAS oncogene family OS=Canis lupus familiaris OX=9615 GN=RAP2A PE=4 SV=2	C_familiaris	1	1	1	1
High	E2R125	Perilipin OS=Canis lupus familiaris OX=9615 GN=PLIN3 PE=3 SV=2	C_familiaris	1	1	4	1
High	F1PQV4	Olfactomedin like 3 OS=Canis lupus familiaris OX=9615 GN=OLFML3 PE=4 SV=2	C_familiaris	1	1	1	1
High	E2RFK4	CD177 molecule OS=Canis lupus familiaris OX=9615 GN=CD177 PE=4 SV=2	C_familiaris	1	1	8	1
High	J9NZJ6	Phosphatidylinositol binding clathrin assembly protein OS=Canis lupus familiaris OX=9615 GN=PICALM PE=4 SV=1	C_familiaris	1	1	2	1
High	A7VLI5	Glycophorin C OS=Canis lupus familiaris OX=9615 GN=Gypc PE=2 SV=1	C_familiaris	1	1	3	1
High	E2R0L9	T-complex 1 OS=Canis lupus familiaris OX=9615 GN=TCP1 PE=3 SV=1	C_familiaris	1	1	4	1
High	E2QUC3	Succinate--CoA ligase [GDP-forming] subunit beta, mitochondrial OS=Canis lupus familiaris OX=9615 GN=SUCLG2 PE=3 SV=3	C_familiaris	1	1	4	1
High	A0A5F4CKF4	Tetraspanin 2 OS=Canis lupus familiaris OX=9615 GN=TSPAN2 PE=4 SV=1	C_familiaris	1	1	24	1
High	F1PBE6	Aldehyde dehydrogenase 6 family member A1 OS=Canis lupus familiaris OX=9615 GN=ALDH6A1 PE=4 SV=3	C_familiaris	1	1	6	1
High	J9P103	Formin like 1 OS=Canis lupus familiaris OX=9615 GN=FMNL1 PE=4 SV=2	C_familiaris	1	1	4	1
High	F6X8I2	Centrosomal protein 170 OS=Canis lupus familiaris OX=9615 GN=CEP170 PE=4 SV=2	C_familiaris	1	1	3	1
High	F1Q168	Dihydropyrimidinase like 4 OS=Canis lupus familiaris OX=9615 GN=DPYSL4 PE=4 SV=3	C_familiaris	1	1	1	1
High	A0A5F4CCP6	ANTXR cell adhesion molecule 1 OS=Canis lupus familiaris OX=9615 GN=ANTXR1 PE=4 SV=1	C_familiaris	1	1	1	1
High	J9NSD0	Density-regulated protein OS=Canis lupus familiaris OX=9615 GN=DENR PE=3 SV=1	C_familiaris	1	1	1	1
High	F1PWN6	NSFL1 cofactor OS=Canis lupus familiaris OX=9615 GN=NSFL1C PE=4 SV=3	C_familiaris	1	1	1	1
High	F1PFG6	Programmed cell death 6 interacting protein OS=Canis lupus familiaris OX=9615 GN=PDCD6IP PE=4 SV=3	C_familiaris	1	1	3	1
High	E2REU6	IF rod domain-containing protein OS=Canis lupus familiaris OX=9615 GN=KRT18 PE=3 SV=3	C_familiaris	2	2	78	1
High	A0A5F4BWN9	Inner membrane mitochondrial protein OS=Canis lupus familiaris OX=9615 GN=IMMT PE=4 SV=1	C_familiaris	1	1	8	1
High	F1PPZ2	Ribonuclease A family member 4 OS=Canis lupus familiaris OX=9615 GN=RNASE4 PE=3 SV=3	C_familiaris	1	1	8	1
High	F1PQD3	Tubulin tyrosine ligase like 12 OS=Canis lupus familiaris OX=9615 GN=TTLL12 PE=4 SV=3	C_familiaris	1	1	1	1
High	H9GW98	Metallothionein OS=Canis lupus familiaris OX=9615 GN=MT1E PE=3 SV=2	C_familiaris	1	1	1	1
High	F1PCD9	Microtubule associated monooxygenase, calponin and LIM domain containing 1 OS=Canis lupus familiaris OX=9615 GN=MICAL1 PE=4 SV=3	C_familiaris	1	1	5	1
High	J9NWJ5	Thioredoxin OS=Canis lupus familiaris OX=9615 PE=3 SV=2	C_familiaris	1	1	2	1
High	A0A5F4D2J2	Transglutaminase 2 OS=Canis lupus familiaris OX=9615 GN=TGM2 PE=4 SV=1	C_familiaris	1	1	9	1
High	F1P9T2	TBC1 domain family member 10B OS=Canis lupus familiaris OX=9615 GN=TBC1D10B PE=4 SV=3	C_familiaris	1	1	1	1
High	A0A5F4CWH9	Tripeptidyl peptidase 2 OS=Canis lupus familiaris OX=9615 GN=TPP2 PE=4 SV=1	C_familiaris	1	1	1	1
High	E2RFA6	Unc-13 homolog D OS=Canis lupus familiaris OX=9615 GN=UNC13D PE=4 SV=2	C_familiaris	1	1	4	1
High	E2RQ04	Proline rich coiled-coil 1 OS=Canis lupus familiaris OX=9615 GN=PRRC1 PE=4 SV=2	C_familiaris	1	1	2	1
High	F1P797	5-aminoimidazole-4-carboxamide ribonucleotide formyltransferase/IMP cyclohydrolase OS=Canis lupus familiaris OX=9615 GN=ATIC PE=3 SV=2	C_familiaris	1	1	6	1
High	E2R066	Serpin family B member 13 OS=Canis lupus familiaris OX=9615 GN=SERPINB13 PE=3 SV=2	C_familiaris	1	1	2	1
High	E2RQ08	Dolichyl-diphosphooligosaccharide--protein glycosyltransferase subunit 1 OS=Canis lupus familiaris OX=9615 GN=RPN1 PE=1 SV=1	C_familiaris	1	1	4	1
High	F1PFV3	Rho GTPase activating protein 6 OS=Canis lupus familiaris OX=9615 GN=ARHGAP6 PE=4 SV=3	C_familiaris	1	1	2	1
High	E2R4F5	60S ribosomal protein L13 OS=Canis lupus familiaris OX=9615 GN=RPL13 PE=3 SV=1	C_familiaris	1	1	1	1
High	F1P9K6	Junctional adhesion molecule 3 OS=Canis lupus familiaris OX=9615 GN=JAM3 PE=4 SV=2	C_familiaris	1	1	2	1
High	F1Q2X9	Solute carrier family 11 member 2 OS=Canis lupus familiaris OX=9615 GN=SLC11A2 PE=3 SV=3	C_familiaris	1	1	3	1
High	P60467	Protein transport protein Sec61 subunit beta OS=Canis lupus familiaris OX=9615 GN=SEC61B PE=1 SV=2	C_familiaris	1	1	8	1
High	E2R9N5	RNA binding motif protein 12 OS=Canis lupus familiaris OX=9615 GN=RBM12 PE=4 SV=2	C_familiaris	2	2	5	1
High	A0A5F4D3S8	Malectin OS=Canis lupus familiaris OX=9615 GN=MLEC PE=4 SV=1	C_familiaris	1	1	3	1
High	A0A5F4CN47	4-aminobutyrate aminotransferase OS=Canis lupus familiaris OX=9615 GN=ABAT PE=4 SV=1	C_familiaris	1	1	2	1
High	A0A5F4D103	Fc fragment of IgE receptor II OS=Canis lupus familiaris OX=9615 GN=FCER2 PE=4 SV=1	C_familiaris	1	1	2	1
High	A0A5F4C2D9	Adhesion regulating molecule 1 OS=Canis lupus familiaris OX=9615 GN=ADRM1 PE=4 SV=1	C_familiaris	1	1	3	1
High	E2RKS4	Eukaryotic translation initiation factor 4B OS=Canis lupus familiaris OX=9615 GN=EIF4B PE=4 SV=2	C_familiaris	1	1	11	1
High	E2RFD8	Macrophage receptor with collagenous structure OS=Canis lupus familiaris OX=9615 GN=MARCO PE=4 SV=2	C_familiaris	1	1	6	1
High	E2R8W7	Calcium binding protein 39 OS=Canis lupus familiaris OX=9615 GN=CAB39 PE=4 SV=1	C_familiaris	1	1	2	1
High	F1PW22	Ethylmalonyl-CoA decarboxylase 1 OS=Canis lupus familiaris OX=9615 GN=ECHDC1 PE=3 SV=2	C_familiaris	1	1	1	1
High	E2RH48	Proteasome 26S subunit, ATPase 4 OS=Canis lupus familiaris OX=9615 GN=PSMC4 PE=3 SV=1	C_familiaris	1	1	2	1
High	A0A5F4BZT2	MTSS I-BAR domain containing 1 OS=Canis lupus familiaris OX=9615 GN=MTSS1 PE=4 SV=1	C_familiaris	1	1	5	1
High	A0A5F4BWL7	Sperm antigen with calponin homology and coiled-coil domains 1 OS=Canis lupus familiaris OX=9615 GN=SPECC1 PE=4 SV=1	C_familiaris	1	1	3	1
High	F1P649	Guanylate cyclase soluble subunit alpha-1 OS=Canis lupus familiaris OX=9615 GN=GUCY1A1 PE=3 SV=1	C_familiaris	1	1	5	1
High	F1P793	Integrin subunit alpha M OS=Canis lupus familiaris OX=9615 GN=ITGAM PE=3 SV=3	C_familiaris	1	1	9	1
High	F1PU05	Membrane associated ring-CH-type finger 8 OS=Canis lupus familiaris OX=9615 GN=MARCHF8 PE=4 SV=2	C_familiaris	1	1	2	1
High	F1PUB3	Heart development protein with EGF like domains 1 OS=Canis lupus familiaris OX=9615 GN=HEG1 PE=4 SV=3	C_familiaris	1	1	2	1
High	E2QY46	Dicarbonyl and L-xylulose reductase OS=Canis lupus familiaris OX=9615 GN=DCXR PE=4 SV=2	C_familiaris	1	1	2	1
High	A0A140T8E6	Uncharacterized protein OS=Canis lupus familiaris OX=9615 GN=JUP PE=4 SV=1	C_familiaris	1	1	1	1
High	J9NU76	von Willebrand factor C and EGF domains OS=Canis lupus familiaris OX=9615 GN=VWCE PE=4 SV=1	C_familiaris	1	1	6	1
High	F1PPJ1	Phosphatidylinositol-5-phosphate 4-kinase type 2 alpha OS=Canis lupus familiaris OX=9615 GN=PIP4K2A PE=4 SV=2	C_familiaris	1	1	7	1
High	A0A5F4CVG3	Mesoderm development LRP chaperone OS=Canis lupus familiaris OX=9615 GN=MESD PE=4 SV=1	C_familiaris	1	1	4	1
High	A0A5F4BY69	Collagen type XII alpha 1 chain OS=Canis lupus familiaris OX=9615 GN=COL12A1 PE=4 SV=1	C_familiaris	1	1	2	1
High	E2R7A0	Hydroxyacylglutathione hydrolase OS=Canis lupus familiaris OX=9615 GN=HAGH PE=3 SV=2	C_familiaris	1	1	2	1
High	A0A5F4C3L7	Milk fat globule-EGF factor 8 protein OS=Canis lupus familiaris OX=9615 GN=MFGE8 PE=4 SV=1	C_familiaris	1	1	8	1
High	F1PQS8	CKLF like MARVEL transmembrane domain containing 6 OS=Canis lupus familiaris OX=9615 GN=CMTM6 PE=4 SV=2	C_familiaris	1	1	3	1
High	A0A5F4BUI2	Uncharacterized protein OS=Canis lupus familiaris OX=9615 GN=OGDH PE=4 SV=1	C_familiaris	1	1	3	1
High	J9NU43	Glycoprotein-N-acetylgalactosamine 3-beta-galactosyltransferase 1 OS=Canis lupus familiaris OX=9615 GN=C1GALT1 PE=3 SV=1	C_familiaris	1	1	2	1
High	E2R0W5	Uncharacterized protein OS=Canis lupus familiaris OX=9615 GN=CR2 PE=4 SV=3	C_familiaris	1	1	3	1
High	Q5QQ50	Xylosyltransferase 2 OS=Canis lupus familiaris OX=9615 GN=XYLT2 PE=2 SV=1	C_familiaris	1	1	3	1
High	A0A5F4D728	Tetraspanin 14 OS=Canis lupus familiaris OX=9615 GN=TSPAN14 PE=4 SV=1	C_familiaris	1	1	5	1
High	A0A5F4BPU2	Lymphocyte antigen 9 OS=Canis lupus familiaris OX=9615 GN=LY9 PE=4 SV=1	C_familiaris	1	1	6	1
High	A0A5F4CIT2	Plexin domain containing 2 OS=Canis lupus familiaris OX=9615 GN=PLXDC2 PE=4 SV=1	C_familiaris	1	1	3	1
High	E2RC10	Synaptophysin like 1 OS=Canis lupus familiaris OX=9615 GN=SYPL1 PE=4 SV=3	C_familiaris	1	1	1	1
High	A0A5F4DB11	GDP-mannose 4,6-dehydratase OS=Canis lupus familiaris OX=9615 GN=GMDS PE=4 SV=1	C_familiaris	1	1	1	1
High	E2R4N6	Inhibin subunit beta C OS=Canis lupus familiaris OX=9615 GN=INHBC PE=3 SV=1	C_familiaris	1	1	3	1
High	A0A5F4CWJ4	Sorting nexin 1 OS=Canis lupus familiaris OX=9615 GN=SNX1 PE=4 SV=1	C_familiaris	1	1	5	1
High	E2QUR6	Glycoprotein nmb OS=Canis lupus familiaris OX=9615 GN=GPNMB PE=4 SV=2	C_familiaris	1	1	6	1
High	J9P8J3	Heterogeneous nuclear ribonucleoprotein K OS=Canis lupus familiaris OX=9615 GN=HNRNPK PE=4 SV=2	C_familiaris	1	1	3	1
High	J9PAI4	Chaperonin containing TCP1 subunit 5 OS=Canis lupus familiaris OX=9615 GN=CCT5 PE=3 SV=2	C_familiaris	1	1	3	1
High	A0A5F4CB30	Serine/threonine kinase 4 OS=Canis lupus familiaris OX=9615 GN=STK4 PE=4 SV=1	C_familiaris	1	1	2	1
High	J9P9V8	Tetraspanin OS=Canis lupus familiaris OX=9615 GN=CD82 PE=3 SV=2	C_familiaris	1	1	14	1
High	E2QUZ2	Tetraspanin OS=Canis lupus familiaris OX=9615 GN=CD53 PE=3 SV=1	C_familiaris	1	1	3	1
High	J9P5N6	ADP ribosylation factor 4 OS=Canis lupus familiaris OX=9615 GN=ARF4 PE=3 SV=2	C_familiaris	1	1	18	1
High	F1PLH5	ArfGAP with FG repeats 1 OS=Canis lupus familiaris OX=9615 GN=AGFG1 PE=4 SV=3	C_familiaris	1	1	2	1
High	J9P2A2	Hypoxanthine phosphoribosyltransferase OS=Canis lupus familiaris OX=9615 GN=PRTFDC1 PE=3 SV=2	C_familiaris	1	2	20	1
High	E2R7F3	Uncharacterized protein OS=Canis lupus familiaris OX=9615 PE=3 SV=3	C_familiaris	1	1	4	1
High	A0A5F4C3G8	CD47 molecule OS=Canis lupus familiaris OX=9615 GN=CD47 PE=4 SV=1	C_familiaris	1	1	1	1
High	E2R0K3	Copine 3 OS=Canis lupus familiaris OX=9615 GN=CPNE3 PE=4 SV=2	C_familiaris	2	2	4	1
High	E2R416	Lumican OS=Canis lupus familiaris OX=9615 GN=LUM PE=4 SV=1	C_familiaris	1	1	2	1
High	E2RMQ5	CD200 molecule OS=Canis lupus familiaris OX=9615 GN=CD200 PE=4 SV=3	C_familiaris	1	1	2	1
High	A0A5F4BWD0	Selenophosphate synthetase 1 OS=Canis lupus familiaris OX=9615 GN=SEPHS1 PE=4 SV=1	C_familiaris	1	1	1	1
High	J9P9T3	Adenylate kinase isoenzyme 1 OS=Canis lupus familiaris OX=9615 GN=AK1 PE=3 SV=1	C_familiaris	1	1	1	1
High	F1Q3C4	Uncharacterized protein OS=Canis lupus familiaris OX=9615 GN=LOC479912 PE=3 SV=3	C_familiaris	1	1	4	1
High	F1PDQ4	Cytoplasmic FMR1-interacting protein OS=Canis lupus familiaris OX=9615 GN=CYFIP1 PE=3 SV=3	C_familiaris	1	1	3	1
High	F1PVT2	Mastermind like transcriptional coactivator 1 OS=Canis lupus familiaris OX=9615 GN=MAML1 PE=4 SV=3	C_familiaris	1	1	2	1
High	F1PIH9	HYDIN axonemal central pair apparatus protein OS=Canis lupus familiaris OX=9615 GN=HYDIN PE=4 SV=3	C_familiaris	1	1	1	1
High	A0A5F4CXK4	Uncharacterized protein OS=Canis lupus familiaris OX=9615 GN=TMSB4X PE=4 SV=1	C_familiaris	1	1	5	1
High	F1Q0B6	Src kinase associated phosphoprotein 2 OS=Canis lupus familiaris OX=9615 GN=SKAP2 PE=4 SV=2	C_familiaris	1	1	5	1
High	J9P0A1	ZFP2 zinc finger protein OS=Canis lupus familiaris OX=9615 GN=ZFP2 PE=4 SV=1	C_familiaris	1	3	34	1
High	A0A5F4CM46	Ribosomal protein L28 OS=Canis lupus familiaris OX=9615 GN=RPL28 PE=4 SV=1	C_familiaris	1	1	2	1
High	F1PBT1	Rho GTPase activating protein 45 OS=Canis lupus familiaris OX=9615 GN=ARHGAP45 PE=4 SV=2	C_familiaris	1	1	3	1
High	A0A5F4DNJ7	SEC24 homolog D, COPII coat complex component OS=Canis lupus familiaris OX=9615 GN=SEC24D PE=4 SV=1	C_familiaris	1	1	16	1
High	E2REE2	Family with sequence similarity 172 member A OS=Canis lupus familiaris OX=9615 GN=FAM172A PE=4 SV=3	C_familiaris	1	1	1	1
High	A0A5F4CVW1	SRP receptor subunit beta OS=Canis lupus familiaris OX=9615 GN=SRPRB PE=4 SV=1	C_familiaris	1	1	2	1
High	J9P3T9	RAN binding protein 1 OS=Canis lupus familiaris OX=9615 GN=RANBP1 PE=4 SV=2	C_familiaris	1	1	2	1
High	A0A5F4C8R1	Platelet endothelial aggregation receptor 1 OS=Canis lupus familiaris OX=9615 GN=PEAR1 PE=4 SV=1	C_familiaris	1	1	3	1
High	A0A5F4C665	SH3 domain containing GRB2 like, endophilin B2 OS=Canis lupus familiaris OX=9615 GN=SH3GLB2 PE=4 SV=1	C_familiaris	1	1	2	1
High	A0A5F4C3R2	Hyaluronan and proteoglycan link protein 3 OS=Canis lupus familiaris OX=9615 GN=HAPLN3 PE=4 SV=1	C_familiaris	1	1	1	1
High	A0A5F4C3Q3	FKBP prolyl isomerase 4 OS=Canis lupus familiaris OX=9615 GN=FKBP4 PE=4 SV=1	C_familiaris	1	1	5	1
High	F1PPL6	RAP2C, member of RAS oncogene family OS=Canis lupus familiaris OX=9615 GN=RAP2C PE=4 SV=2	C_familiaris	1	1	3	1
High	E2RNW5	Endoplasmic reticulum oxidoreductase 1 alpha OS=Canis lupus familiaris OX=9615 GN=ERO1A PE=4 SV=1	C_familiaris	1	1	2	1
High	A0A5F4CNN7	Uncharacterized protein OS=Canis lupus familiaris OX=9615 PE=4 SV=1	C_familiaris	1	1	29	1
High	A0A5F4CWT6	Arrestin beta 1 OS=Canis lupus familiaris OX=9615 GN=ARRB1 PE=4 SV=1	C_familiaris	1	1	2	1
High	E2R9Q1	Uncharacterized protein OS=Canis lupus familiaris OX=9615 GN=LOC100685649 PE=4 SV=3	C_familiaris	1	1	2	1
High	F1PR74	Malignant fibrous histiocytoma amplified sequence 1 OS=Canis lupus familiaris OX=9615 GN=MFHAS1 PE=4 SV=3	C_familiaris	1	1	5	1
High	J9P922	Cytochrome b reductase 1 OS=Canis lupus familiaris OX=9615 GN=CYBRD1 PE=4 SV=2	C_familiaris	1	1	1	1
High	A0A5F4CH61	Electron transfer flavoprotein subunit alpha OS=Canis lupus familiaris OX=9615 GN=ETFA PE=4 SV=1	C_familiaris	1	1	2	1
High	E2R9R6	Programmed cell death 10 OS=Canis lupus familiaris OX=9615 GN=PDCD10 PE=4 SV=3	C_familiaris	1	1	4	1
High	A0A5F4CR04	Citron rho-interacting serine/threonine kinase OS=Canis lupus familiaris OX=9615 GN=CIT PE=4 SV=1	C_familiaris	2	2	7	1
High	A0A5F4CW56	Glutaredoxin 3 OS=Canis lupus familiaris OX=9615 GN=GLRX3 PE=4 SV=1	C_familiaris	1	1	2	1
High	F1PV91	CD6 molecule OS=Canis lupus familiaris OX=9615 GN=CD6 PE=4 SV=3	C_familiaris	1	1	2	1
High	A0A5F4CYV2	Succinate dehydrogenase complex flavoprotein subunit A OS=Canis lupus familiaris OX=9615 GN=SDHA PE=4 SV=1	C_familiaris	1	1	1	1
High	E2RHD5	CD2 molecule OS=Canis lupus familiaris OX=9615 GN=CD2 PE=4 SV=2	C_familiaris	1	1	1	1
High	F1Q462	Superoxide dismutase [Cu-Zn] OS=Canis lupus familiaris OX=9615 GN=SOD1 PE=3 SV=3	C_familiaris	1	1	4	1
High	A0A5F4CGR8	Polycomb group ring finger 3 OS=Canis lupus familiaris OX=9615 GN=PCGF3 PE=4 SV=1	C_familiaris	1	1	6	1
High	A0A5F4D0U7	Structural maintenance of chromosomes flexible hinge domain containing 1 OS=Canis lupus familiaris OX=9615 GN=SMCHD1 PE=4 SV=1	C_familiaris	1	1	2	1
High	A0A5F4DI79	Myosin IC OS=Canis lupus familiaris OX=9615 GN=MYO1C PE=4 SV=1	C_familiaris	1	1	1	1
High	E2QXP3	Arginyl aminopeptidase OS=Canis lupus familiaris OX=9615 GN=RNPEP PE=4 SV=2	C_familiaris	1	1	2	1
High	F1P6B7	Annexin OS=Canis lupus familiaris OX=9615 GN=ANXA1 PE=3 SV=1	C_familiaris	1	1	1	1
High	J9P2L7	IGv domain-containing protein OS=Canis lupus familiaris OX=9615 PE=4 SV=2	C_familiaris	1	1	3	1
High	A0A5F4D1I6	Betaine--homocysteine S-methyltransferase 2 OS=Canis lupus familiaris OX=9615 GN=BHMT2 PE=4 SV=1	C_familiaris	1	1	1	1
High	F1PVD9	PYM homolog 1, exon junction complex associated factor OS=Canis lupus familiaris OX=9615 GN=PYM1 PE=4 SV=2	C_familiaris	1	1	1	1
High	A0A5F4DC46	Uncharacterized protein OS=Canis lupus familiaris OX=9615 PE=4 SV=1	C_familiaris	1	1	8	1
High	E2RGZ5	Transmembrane p24 trafficking protein 2 OS=Canis lupus familiaris OX=9615 GN=TMED2 PE=3 SV=1	C_familiaris	1	1	2	1
High	E2RR68	Niban apoptosis regulator 2 OS=Canis lupus familiaris OX=9615 GN=NIBAN2 PE=4 SV=1	C_familiaris	1	1	2	1
High	A0A5F4CVH7	Rho guanine nucleotide exchange factor 2 OS=Canis lupus familiaris OX=9615 GN=ARHGEF2 PE=4 SV=1	C_familiaris	1	1	2	1
High	E2R9P3	Septin 4 OS=Canis lupus familiaris OX=9615 GN=SEPTIN4 PE=3 SV=3	C_familiaris	1	1	2	1
High	A0A5F4CJE6	T-cell surface glycoprotein CD3 epsilon chain OS=Canis lupus familiaris OX=9615 GN=CD3E PE=4 SV=1	C_familiaris	1	1	2	1
High	F1PFB7	WAS/WASL interacting protein family member 1 OS=Canis lupus familiaris OX=9615 GN=WIPF1 PE=4 SV=3	C_familiaris	1	1	3	1
High	A0A5F4CNA4	Uncharacterized protein OS=Canis lupus familiaris OX=9615 GN=LOC611915 PE=4 SV=1	C_familiaris	1	1	1	1
High	E2RAF0	Uncharacterized protein OS=Canis lupus familiaris OX=9615 GN=KLC1 PE=4 SV=3	C_familiaris	1	1	4	1
High	J9PAG9	Transmembrane protein 126A OS=Canis lupus familiaris OX=9615 GN=TMEM126A PE=4 SV=2	C_familiaris	1	1	4	1
High	A0A5F4CT89	Cingulin like 1 OS=Canis lupus familiaris OX=9615 GN=CGNL1 PE=4 SV=1	C_familiaris	1	1	3	1
High	E2R0Y5	Succinate--CoA ligase [ADP/GDP-forming] subunit alpha, mitochondrial OS=Canis lupus familiaris OX=9615 GN=SUCLG1 PE=3 SV=1	C_familiaris	1	1	3	1
High	E2RT32	Syntaxin 12 OS=Canis lupus familiaris OX=9615 GN=STX12 PE=3 SV=2	C_familiaris	1	1	4	1
High	F1Q3V2	ATP-citrate synthase OS=Canis lupus familiaris OX=9615 GN=ACLY PE=3 SV=3	C_familiaris	1	1	1	1
High	A0A5F4DCB1	Uncharacterized protein OS=Canis lupus familiaris OX=9615 PE=4 SV=1	C_familiaris	1	1	9	1
High	A0A5F4CUB1	Smoothelin OS=Canis lupus familiaris OX=9615 GN=SMTN PE=4 SV=1	C_familiaris	1	1	3	1
High	A0A5F4BZF0	Ubiquinol-cytochrome c reductase core protein 2 OS=Canis lupus familiaris OX=9615 GN=UQCRC2 PE=4 SV=1	C_familiaris	1	1	1	1
High	E2RAM4	Fc fragment of IgE receptor Ig OS=Canis lupus familiaris OX=9615 GN=FCER1G PE=4 SV=1	C_familiaris	1	1	1	1
High	F1PVF1	Uncharacterized protein OS=Canis lupus familiaris OX=9615 PE=3 SV=2	C_familiaris	1	1	2	1
High	A0A5F4D1L1	Solute carrier family 44 member 1 OS=Canis lupus familiaris OX=9615 GN=SLC44A1 PE=4 SV=1	C_familiaris	1	1	1	1
High	J9NY67	Uncharacterized protein OS=Canis lupus familiaris OX=9615 PE=3 SV=1	C_familiaris	1	1	5	1
High	E2R3Q7	Amidohydro-rel domain-containing protein OS=Canis lupus familiaris OX=9615 PE=4 SV=3	C_familiaris	1	1	3	1
Medium	A0A5F4CWT5	NAD-dependent protein deacylase sirtuin-5, mitochondrial OS=Canis lupus familiaris OX=9615 GN=SIRT5 PE=4 SV=1	C_familiaris	1	1	1	1
Medium	F1Q4I3	MARVEL domain-containing protein OS=Canis lupus familiaris OX=9615 PE=4 SV=3	C_familiaris	1	1	2	1
Medium	A0A5F4CPM5	Uncharacterized protein OS=Canis lupus familiaris OX=9615 PE=4 SV=1	C_familiaris	1	1	1	1
Medium	F6XF05	Peptidyl arginine deiminase 3 OS=Canis lupus familiaris OX=9615 GN=PADI3 PE=4 SV=2	C_familiaris	1	1	1	1
Medium	A0A5F4C057	Uncharacterized protein OS=Canis lupus familiaris OX=9615 PE=4 SV=1	C_familiaris	1	1	24	1
Medium	F1PQM7	Tetraspanin OS=Canis lupus familiaris OX=9615 GN=CD9 PE=3 SV=3	C_familiaris	1	1	15	1
Medium	F1PD37	Serine/threonine-protein phosphatase 2A activator OS=Canis lupus familiaris OX=9615 GN=PTPA PE=3 SV=3	C_familiaris	1	1	2	1
Medium	A0A5F4CJ08	DnaJ homolog subfamily B member 11 OS=Canis lupus familiaris OX=9615 GN=DNAJB11 PE=4 SV=1	C_familiaris	1	1	1	1
Medium	A0A5F4CCF4	CD166 antigen OS=Canis lupus familiaris OX=9615 GN=ALCAM PE=4 SV=1	C_familiaris	1	1	2	1
Medium	A0A5F4DDT3	NUF2 component of NDC80 kinetochore complex OS=Canis lupus familiaris OX=9615 GN=NUF2 PE=4 SV=1	C_familiaris	1	1	1	1
Medium	F1PM98	Collagen type IV alpha 3 chain OS=Canis lupus familiaris OX=9615 GN=COL4A3 PE=4 SV=3	C_familiaris	1	1	16	1
Medium	E2RR19	Enkurin, TRPC channel interacting protein OS=Canis lupus familiaris OX=9615 GN=ENKUR PE=4 SV=2	C_familiaris	1	1	3	1
Medium	J9NTA1	Methyltransferase like 7A OS=Canis lupus familiaris OX=9615 GN=METTL7A PE=4 SV=2	C_familiaris	1	1	2	1
Medium	A0A5F4D3P9	Uncharacterized protein OS=Canis lupus familiaris OX=9615 GN=HNRNPC PE=4 SV=1	C_familiaris	1	1	2	1
Medium	E2R578	Solute carrier family 25 member 11 OS=Canis lupus familiaris OX=9615 GN=SLC25A11 PE=3 SV=2	C_familiaris	1	1	3	1
Medium	F1PIL9	Interleukin 1 receptor accessory protein OS=Canis lupus familiaris OX=9615 GN=IL1RAP PE=4 SV=3	C_familiaris	1	1	1	1
Medium	F1PMH6	Mannose receptor C-type 1 OS=Canis lupus familiaris OX=9615 GN=MRC1 PE=4 SV=3	C_familiaris	1	1	1	1
Medium	P28490	Calreticulin (Fragment) OS=Canis lupus familiaris OX=9615 GN=CALR PE=1 SV=1	C_familiaris	1	1	1	1
Medium	F1Q3Z3	Solute carrier organic anion transporter family member OS=Canis lupus familiaris OX=9615 GN=SLCO6A1 PE=3 SV=2	C_familiaris	1	1	85	1
Medium	J9P9U0	Uncharacterized protein OS=Canis lupus familiaris OX=9615 PE=4 SV=2	C_familiaris	1	1	6	1
Medium	A0A5F4C799	Proteasome subunit alpha 4 OS=Canis lupus familiaris OX=9615 GN=PSMA4 PE=4 SV=1	C_familiaris	1	1	1	1
Medium	A0A5F4DKV6	Family with sequence similarity 49 member B OS=Canis lupus familiaris OX=9615 GN=FAM49B PE=4 SV=1	C_familiaris	1	1	1	1
Medium	A0A5F4DMY7	IQ motif containing GTPase activating protein 3 OS=Canis lupus familiaris OX=9615 GN=IQGAP3 PE=4 SV=1	C_familiaris	1	1	1	1
Medium	F1PA87	Protein kinase cAMP-activated catalytic subunit beta OS=Canis lupus familiaris OX=9615 GN=PRKACB PE=3 SV=2	C_familiaris	1	1	2	1
Medium	E2RSV9	Nucleobindin 1 OS=Canis lupus familiaris OX=9615 GN=NUCB1 PE=4 SV=1	C_familiaris	1	1	3	1
Medium	E2R3X6	Membrane bound O-acyltransferase domain containing 7 OS=Canis lupus familiaris OX=9615 GN=MBOAT7 PE=3 SV=1	C_familiaris	1	1	1	1
Medium	E2RQC9	RuvB-like helicase OS=Canis lupus familiaris OX=9615 GN=RUVBL1 PE=3 SV=2	C_familiaris	1	1	1	1
Medium	E2QW67	TSPY like 2 OS=Canis lupus familiaris OX=9615 GN=TSPYL2 PE=3 SV=2	C_familiaris	1	1	6	1
Medium	F1P6I0	V-set immunoregulatory receptor OS=Canis lupus familiaris OX=9615 GN=VSIR PE=4 SV=3	C_familiaris	1	1	1	1
Medium	F2Z4P2	Ribosomal_L7Ae domain-containing protein OS=Canis lupus familiaris OX=9615 GN=RPL7A PE=4 SV=3	C_familiaris	1	1	1	1
Medium	J9NWC3	MYC target 1 OS=Canis lupus familiaris OX=9615 GN=MYCT1 PE=4 SV=2	C_familiaris	1	1	1	1
Medium	A0A5F4BS58	Transmembrane protein 40 OS=Canis lupus familiaris OX=9615 GN=TMEM40 PE=4 SV=1	C_familiaris	1	1	3	1
Medium	E2R833	Leucine rich alpha-2-glycoprotein 1 OS=Canis lupus familiaris OX=9615 GN=LRG1 PE=4 SV=3	C_familiaris	1	1	1	1
Medium	E2RID6	Dystrophin related protein 2 OS=Canis lupus familiaris OX=9615 GN=DRP2 PE=4 SV=3	C_familiaris	1	1	1	1
Medium	A0A5F4D4C2	BUB1 mitotic checkpoint serine/threonine kinase OS=Canis lupus familiaris OX=9615 GN=BUB1 PE=4 SV=1	C_familiaris	1	1	8	1
Medium	F1PE67	AP-2 complex subunit alpha OS=Canis lupus familiaris OX=9615 GN=AP2A1 PE=3 SV=3	C_familiaris	1	1	1	1
Medium	F1PN96	DnaJ heat shock protein family (Hsp40) member B2 OS=Canis lupus familiaris OX=9615 GN=DNAJB2 PE=4 SV=3	C_familiaris	1	1	1	1
Medium	L7N0D0	Serine/threonine-protein phosphatase OS=Canis lupus familiaris OX=9615 GN=PPP1CA PE=3 SV=1	C_familiaris	1	1	1	1
Medium	F1PRL5	Solute carrier family 25 member 5 OS=Canis lupus familiaris OX=9615 GN=SLC25A5 PE=3 SV=2	C_familiaris	1	1	1	1
Medium	E2QUL2	Vesicle associated membrane protein 8 OS=Canis lupus familiaris OX=9615 GN=VAMP8 PE=4 SV=3	C_familiaris	1	1	10	1
Medium	E2RDX2	Charged multivesicular body protein 4B OS=Canis lupus familiaris OX=9615 GN=CHMP4B PE=4 SV=1	C_familiaris	1	1	1	1
Medium	A0A5F4D883	Myotubularin 1 OS=Canis lupus familiaris OX=9615 GN=MTM1 PE=4 SV=1	C_familiaris	1	1	10	1
Medium	A0A5F4BVR0	Protein phosphatase 1 regulatory subunit 12A OS=Canis lupus familiaris OX=9615 GN=PPP1R12A PE=4 SV=1	C_familiaris	1	1	4	1
Medium	E2QWG2	F2R like thrombin or trypsin receptor 3 OS=Canis lupus familiaris OX=9615 GN=F2RL3 PE=3 SV=2	C_familiaris	1	1	2	1
Medium	A0A5F4CJR2	Hypoxia up-regulated 1 OS=Canis lupus familiaris OX=9615 GN=HYOU1 PE=4 SV=1	C_familiaris	1	1	2	1
Medium	A0A5F4CFS5	URI1 prefoldin like chaperone OS=Canis lupus familiaris OX=9615 GN=URI1 PE=4 SV=1	C_familiaris	1	1	23	1
Medium	A0A5F4BWE9	HECT and RLD domain containing E3 ubiquitin protein ligase 2 OS=Canis lupus familiaris OX=9615 GN=HERC2 PE=4 SV=1	C_familiaris	1	1	5	1
Medium	A0A5F4BZ35	Ras and Rab interactor 3 OS=Canis lupus familiaris OX=9615 GN=RIN3 PE=4 SV=1	C_familiaris	1	1	1	1
Medium	F1PTG8	Trifunctional purine biosynthetic protein adenosine-3 OS=Canis lupus familiaris OX=9615 GN=LOC100856570 PE=3 SV=3	C_familiaris	1	1	1	1
Medium	A0A5F4D6W3	Uncharacterized protein OS=Canis lupus familiaris OX=9615 GN=CLCNKA PE=4 SV=1	C_familiaris	1	1	22	1
Medium	A0A5F4C1Y1	Dynactin subunit 5 OS=Canis lupus familiaris OX=9615 GN=DCTN5 PE=4 SV=1	C_familiaris	1	1	1	1
Medium	A0A5F4D6P2	Vesicle associated membrane protein 7 OS=Canis lupus familiaris OX=9615 GN=VAMP7 PE=4 SV=1	C_familiaris	1	1	1	1
Medium	F1PGP3	Family with sequence similarity 3 member C OS=Canis lupus familiaris OX=9615 GN=FAM3C PE=4 SV=2	C_familiaris	1	1	1	1
Medium	J9NZM7	Strawberry notch homolog 1 OS=Canis lupus familiaris OX=9615 GN=SBNO1 PE=4 SV=2	C_familiaris	1	1	1	1
Medium	A0A5F4BWD4	Endonuclease domain containing 1 OS=Canis lupus familiaris OX=9615 GN=ENDOD1 PE=4 SV=1	C_familiaris	1	1	2	1
Medium	J9P0B4	Tudor domain containing 15 OS=Canis lupus familiaris OX=9615 GN=TDRD15 PE=4 SV=2	C_familiaris	1	1	9	1
Medium	A0A5F4CSA1	Uncharacterized protein OS=Canis lupus familiaris OX=9615 GN=RNF31 PE=4 SV=1	C_familiaris	1	1	1	1
Medium	F1PS24	Collagen type II alpha 1 chain OS=Canis lupus familiaris OX=9615 GN=COL2A1 PE=4 SV=2	C_familiaris	1	1	7	1
Medium	A0A5F4BYQ7	Pleckstrin and Sec7 domain containing 2 OS=Canis lupus familiaris OX=9615 GN=PSD2 PE=4 SV=1	C_familiaris	1	1	6	1
Medium	J9P2Z5	Fibronectin type III domain containing 1 OS=Canis lupus familiaris OX=9615 GN=FNDC1 PE=4 SV=2	C_familiaris	1	1	1	1
Medium	F1Q1P4	Microtubule actin crosslinking factor 1 OS=Canis lupus familiaris OX=9615 GN=MACF1 PE=4 SV=3	C_familiaris	1	1	2	1
Medium	A0A5F4BVI3	Uncharacterized protein OS=Canis lupus familiaris OX=9615 GN=GNG5 PE=4 SV=1	C_familiaris	1	1	1	1
Medium	F1PLQ3	Cytochrome P450 family 20 subfamily A member 1 OS=Canis lupus familiaris OX=9615 GN=CYP20A1 PE=4 SV=2	C_familiaris	1	1	1	1
Medium	E2R9R5	Peptidylprolyl isomerase OS=Canis lupus familiaris OX=9615 GN=FKBP2 PE=4 SV=3	C_familiaris	1	1	4	1
Medium	A0A5F4C933	FAT atypical cadherin 4 OS=Canis lupus familiaris OX=9615 GN=FAT4 PE=4 SV=1	C_familiaris	1	1	1	1
Medium	A0A5F4CXL8	Signal transducer and activator of transcription 1 OS=Canis lupus familiaris OX=9615 GN=STAT1 PE=4 SV=1	C_familiaris	1	1	1	1
Medium	F1PI77	Guanylate cyclase 1 soluble subunit alpha 2 OS=Canis lupus familiaris OX=9615 GN=GUCY1A2 PE=3 SV=3	C_familiaris	1	1	45	1
Medium	F1PSQ0	IQ motif containing GTPase activating protein 2 OS=Canis lupus familiaris OX=9615 GN=IQGAP2 PE=4 SV=3	C_familiaris	1	1	4	1
Medium	A0A5F4C7L7	Tetraspanin 9 OS=Canis lupus familiaris OX=9615 GN=TSPAN9 PE=4 SV=1	C_familiaris	1	1	2	1
Medium	A0A5F4DNK8	Protein phosphatase 3 catalytic subunit gamma OS=Canis lupus familiaris OX=9615 GN=PPP3CC PE=4 SV=1	C_familiaris	1	1	7	1
Medium	F6Y6B4	SH3 domain binding glutamate rich protein like 2 OS=Canis lupus familiaris OX=9615 GN=SH3BGRL2 PE=4 SV=2	C_familiaris	1	1	2	1
Medium	J9NRF6	Extended synaptotagmin 1 OS=Canis lupus familiaris OX=9615 GN=ESYT1 PE=4 SV=2	C_familiaris	1	1	2	1
Medium	F1PBK7	AAA domain-containing protein OS=Canis lupus familiaris OX=9615 GN=PSMC3 PE=3 SV=2	C_familiaris	1	1	1	1
Medium	F6X725	ATP binding cassette subfamily E member 1 OS=Canis lupus familiaris OX=9615 GN=ABCE1 PE=4 SV=2	C_familiaris	1	1	9	1
Medium	A0A5F4CNK8	EF-hand domain containing 2 OS=Canis lupus familiaris OX=9615 GN=EFHC2 PE=4 SV=1	C_familiaris	1	1	1	1
Medium	F6UMQ8	Ubiquitin carboxyl-terminal hydrolase 16 OS=Canis lupus familiaris OX=9615 GN=USP16 PE=3 SV=2	C_familiaris	1	1	1	1
Medium	A0A5F4D3P7	Forkhead box J3 OS=Canis lupus familiaris OX=9615 GN=FOXJ3 PE=4 SV=1	C_familiaris	1	1	1	1
Medium	E2RQ73	Exosome component 9 OS=Canis lupus familiaris OX=9615 GN=EXOSC9 PE=4 SV=3	C_familiaris	1	1	3	1
Medium	A0A5F4CB81	Chromogranin B OS=Canis lupus familiaris OX=9615 GN=CHGB PE=4 SV=1	C_familiaris	1	1	1	1
Medium	A0A5F4DJV8	Uncharacterized protein OS=Canis lupus familiaris OX=9615 PE=4 SV=1	C_familiaris	1	1	1	1
Medium	P02727	Glycophorin-A OS=Canis lupus familiaris OX=9615 GN=GYPA PE=1 SV=3	C_familiaris	1	1	6	1
Medium	A0A5F4CIX8	Matrix remodeling associated 5 OS=Canis lupus familiaris OX=9615 GN=MXRA5 PE=4 SV=1	C_familiaris	1	1	1	1
Medium	F1PSY8	Sorting nexin 13 OS=Canis lupus familiaris OX=9615 GN=SNX13 PE=4 SV=2	C_familiaris	1	1	2	1
Medium	A0A5F4DLA7	Uncharacterized protein OS=Canis lupus familiaris OX=9615 GN=HADHB PE=4 SV=1	C_familiaris	1	1	2	1
Medium	Q8MKI5	Caspase-3 OS=Canis lupus familiaris OX=9615 GN=CASP3 PE=2 SV=1	C_familiaris	1	1	1	1
Medium	J9P051	Tr-type G domain-containing protein OS=Canis lupus familiaris OX=9615 PE=4 SV=2	C_familiaris	1	1	1	1
Medium	E2RBK4	Deleted in primary ciliary dyskinesia homolog OS=Canis lupus familiaris OX=9615 GN=DPCD PE=4 SV=1	C_familiaris	1	1	1	1
Medium	A0A5F4CJJ6	Uncharacterized protein OS=Canis lupus familiaris OX=9615 PE=4 SV=1	C_familiaris	1	1	3	1
Medium	E2RNR9	Osteomodulin OS=Canis lupus familiaris OX=9615 GN=OMD PE=4 SV=3	C_familiaris	1	1	1	1
Medium	E2RGG6	Eukaryotic translation initiation factor 3 subunit G OS=Canis lupus familiaris OX=9615 GN=EIF3G PE=3 SV=1	C_familiaris	1	1	1	1
Medium	A0A5F4CBC1	SET domain containing 2, histone lysine methyltransferase OS=Canis lupus familiaris OX=9615 GN=SETD2 PE=4 SV=1	C_familiaris	1	1	4	1
Medium	E2R1R6	Synapse defective Rho GTPase homolog 1 OS=Canis lupus familiaris OX=9615 GN=SYDE1 PE=4 SV=2	C_familiaris	1	1	2	1
Medium	F1PYX8	B double prime 1, subunit of RNA polymerase III transcription initiation factor IIIB OS=Canis lupus familiaris OX=9615 GN=BDP1 PE=4 SV=3	C_familiaris	1	1	1	1
Medium	F1P996	G protein pathway suppressor 1 OS=Canis lupus familiaris OX=9615 GN=GPS1 PE=4 SV=3	C_familiaris	1	1	2	1
Medium	E2RJD3	FERM domain containing 6 OS=Canis lupus familiaris OX=9615 GN=FRMD6 PE=4 SV=3	C_familiaris	1	1	2	1
Medium	J9P947	Mannosyl (alpha-1,6-)-glycoprotein beta-1,2-N-acetylglucosaminyltransferase OS=Canis lupus familiaris OX=9615 GN=MGAT2 PE=4 SV=1	C_familiaris	1	1	1	1
Medium	E2RLB2	RAS like proto-oncogene B OS=Canis lupus familiaris OX=9615 GN=RALB PE=4 SV=1	C_familiaris	1	1	2	1
Medium	E2RLM7	Phosphoglucomutase 2 like 1 OS=Canis lupus familiaris OX=9615 GN=PGM2L1 PE=4 SV=2	C_familiaris	1	1	1	1
Medium	F1PWI8	Ribosomal_L18e/L15P domain-containing protein OS=Canis lupus familiaris OX=9615 PE=4 SV=3	C_familiaris	1	1	1	1
Medium	A0A5F4D621	N-acetylglucosamine-1-phosphate transferase subunits alpha and beta OS=Canis lupus familiaris OX=9615 GN=GNPTAB PE=4 SV=1	C_familiaris	1	1	6	1
Medium	F6Y448	cGMP-dependent protein kinase OS=Canis lupus familiaris OX=9615 GN=PRKG2 PE=3 SV=1	C_familiaris	1	1	2	1
Medium	A0A5F4BUH3	Uncharacterized protein OS=Canis lupus familiaris OX=9615 PE=4 SV=1	C_familiaris	1	1	1	1
Medium	F1PXM4	Taste receptor type 1 member 3 OS=Canis lupus familiaris OX=9615 GN=TAS1R3 PE=3 SV=3	C_familiaris	1	1	1	1
Medium	A0A5F4CG10	Dual specificity phosphatase 2 OS=Canis lupus familiaris OX=9615 GN=DUSP2 PE=4 SV=1	C_familiaris	1	1	3	1
Medium	E2QWJ0	Poly [ADP-ribose] polymerase OS=Canis lupus familiaris OX=9615 GN=PARP4 PE=4 SV=3	C_familiaris	1	1	1	1
Medium	A0A5F4BRB8	Family with sequence similarity 184 member A OS=Canis lupus familiaris OX=9615 GN=FAM184A PE=4 SV=1	C_familiaris	1	1	10	1
Medium	A0A5F4CYA8	MET transcriptional regulator MACC1 OS=Canis lupus familiaris OX=9615 GN=MACC1 PE=4 SV=1	C_familiaris	1	1	6	1
Medium	F1PV31	Transforming acidic coiled-coil containing protein 2 OS=Canis lupus familiaris OX=9615 GN=TACC2 PE=4 SV=3	C_familiaris	1	1	4	1
Medium	E2RFG2	Solute carrier family 35 member E4 OS=Canis lupus familiaris OX=9615 GN=SLC35E4 PE=4 SV=2	C_familiaris	1	1	19	1
Medium	A0A5F4D8R7	ATP binding cassette subfamily A member 12 OS=Canis lupus familiaris OX=9615 GN=ABCA12 PE=4 SV=1	C_familiaris	1	1	11	1
Medium	A0A5F4BVP9	Uncharacterized protein OS=Canis lupus familiaris OX=9615 GN=cOR56A24 PE=4 SV=1	C_familiaris	1	1	1	1
Medium	A0A5F4CUE6	Eukaryotic translation initiation factor 3 subunit J OS=Canis lupus familiaris OX=9615 GN=EIF3J PE=4 SV=1	C_familiaris	1	1	6	1
Medium	E2RGH9	HECT domain E3 ubiquitin protein ligase 1 OS=Canis lupus familiaris OX=9615 GN=HECTD1 PE=4 SV=2	C_familiaris	1	1	4	1
Medium	F1PW14	RAD54 homolog B OS=Canis lupus familiaris OX=9615 GN=RAD54B PE=4 SV=2	C_familiaris	1	1	2	1
Low	E2R5M2	CECR2 histone acetyl-lysine reader OS=Canis lupus familiaris OX=9615 GN=CECR2 PE=4 SV=3	C_familiaris	1	1	2	1
Low	A0A5F4DIV0	Regulator of G protein signaling 3 OS=Canis lupus familiaris OX=9615 GN=RGS3 PE=4 SV=1	C_familiaris	1	1	15	1
Low	A0A5F4BWV7	Protein phosphatase 1 regulatory subunit 13B OS=Canis lupus familiaris OX=9615 GN=PPP1R13B PE=4 SV=1	C_familiaris	1	1	1	1
Low	A0A5F4CWH4	cGMP-specific 3',5'-cyclic phosphodiesterase OS=Canis lupus familiaris OX=9615 GN=PDE5A PE=4 SV=1	C_familiaris	1	1	2	1
Low	A0A5F4BRB3	Uncharacterized protein OS=Canis lupus familiaris OX=9615 PE=4 SV=1	C_familiaris	1	3	3	1
Low	A0A5F4CU16	ZFP62 zinc finger protein OS=Canis lupus familiaris OX=9615 GN=ZFP62 PE=4 SV=1	C_familiaris	1	1	2	1
Low	A0A5F4CW54	Uncharacterized protein OS=Canis lupus familiaris OX=9615 GN=LOC478984 PE=4 SV=1	C_familiaris	1	1	1	1
Low	F1PGL0	ADAM metallopeptidase with thrombospondin type 1 motif 1 OS=Canis lupus familiaris OX=9615 GN=ADAMTS1 PE=4 SV=2	C_familiaris	1	1	1	1
Low	A0A5F4CDV8	ATPase phospholipid transporting 8A1 OS=Canis lupus familiaris OX=9615 GN=ATP8A1 PE=4 SV=1	C_familiaris	1	1	12	1
Low	J9P777	FA complementation group M OS=Canis lupus familiaris OX=9615 GN=FANCM PE=4 SV=2	C_familiaris	1	1	1	1
Low	A0A5F4DEJ1	Spalt like transcription factor 4 OS=Canis lupus familiaris OX=9615 GN=SALL4 PE=4 SV=1	C_familiaris	1	1	1	1
Low	E2RLX8	Transient receptor potential cation channel subfamily V member 2 OS=Canis lupus familiaris OX=9615 GN=TRPV2 PE=3 SV=3	C_familiaris	1	1	5	1
Low	F6XRY2	Eukaryotic translation elongation factor 2 OS=Canis lupus familiaris OX=9615 GN=EEF2 PE=4 SV=1	C_familiaris	1	1	1	1
High	A0A5F4D5S9	Fibronectin OS=Canis lupus familiaris OX=9615 GN=FN1 PE=4 SV=1	C_familiaris	112	370	14999	0

## Sheet: core proteome
Acession number	Description
F1PGS2	Fibrinogen beta chain GN=FGB
F1PBL4	Fibrinogen alpha chain GN=FGA
J9P8M2	Fibronectin GN=FN1
J9NVC6	Immunoglobulin heavy constant mu GN=IGHM
F1P8G0	Fibrinogen gamma chain GN=FGG
F1PGM9	Complement component 4 binding protein alpha GN=C4BPA
A0A5F4BYJ5	Uncharacterized protein
F1P8Z5	Apolipoprotein B GN=APOB
F6UME0	Uncharacterized protein GN=LOC477699
A0A5F4CG91	von Willebrand factor GN=VWF
A0A5F4BNP2	Uncharacterized protein
P49822	Serum albumin GN=ALB
F1PG16	Uncharacterized protein GN=CD5L
F2Z4Q6	Serum albumin GN=AFP
J9PBN6	Uncharacterized protein GN=LOC477699
F1PGM1	Complement C3 GN=C3
H9GWR8	Ig-like domain-containing protein
J9NSQ1	Ig-like domain-containing protein
F1PNY2	Immunoglobulin kappa constant GN=IGKC
P18649	Apolipoprotein E GN=APOE
J9P9J6	Uncharacterized protein
E2RK21	Uncharacterized protein GN=CFH
F1PWW0	Filamin A GN=FLNA
A0A5F4CSF0	Uncharacterized protein
J9PAD1	Uncharacterized protein
F1PDJ5	Apolipoprotein A-I GN=APOA1
J9P430	Transferrin GN=TF
J9NYY8	Ig-like domain-containing protein
A0A5F4BR98	Uncharacterized protein
A0A5F4BWC4	Uncharacterized protein
F1PSS8	Protein S GN=PROS1
P19006	Haptoglobin GN=HP
A0A5F4D2F2	Uncharacterized protein
J9NY02	Ig-like domain-containing protein
A0A5F4CA42	Uncharacterized protein
J9NZT2	Ig-like domain-containing protein
L7N0I0	Ig-like domain-containing protein
J9PAX5	Ig-like domain-containing protein
F1P903	Complement C1r GN=C1R
A0A5F4CSD5	Uncharacterized protein
J9P1G2	Adiponectin A GN=C1QB
A0A5F4CWK7	Uncharacterized protein
E2RJC2	Complement C1q C chain GN=C1QC
A0A5F4CE12	Uncharacterized protein
F1PBI6	Thrombospondin 1 GN=THBS1
F1PSC2	Talin 1 GN=TLN1
F6Y6T8	Uncharacterized protein GN=PIGR
J9P7F7	Ficolin 1 GN=FCN1
A0A5F4BS96	Complement C1s GN=C1S
J9JHH5	Joining chain of multimeric IgA and IgM GN=JCHAIN
A0A5F4CWM9	Myosin-9 GN=MYH9
J9PAL2	Ig-like domain-containing protein
F1Q421	Plasminogen GN=PLG
F2Z4N7	Actin alpha cardiac muscle 1 GN=ACTC1
F1P7J4	Complement C5 GN=C5
E2RE76	Apolipoprotein A-IV GN=APOA4
A0A5F4D5I3	Uncharacterized protein
A0A5F4CKL2	Uncharacterized protein
P25473	Clusterin GN=CLU
A0A5F4BYG2	Uncharacterized protein
A0A5F4DJ18	Uncharacterized protein
H9GWY3	Inter-alpha-trypsin inhibitor heavy chain 4 GN=ITIH4
F1PXD6	Proteoglycan 4 GN=PRG4
F1PN98	Coagulation factor V GN=F5
E2R1P6	Spectrin alpha, erythrocytic 1 GN=SPTA1
A0A0B4J198	Adiponectin D GN=EIF4A2
E2RH18	Complement factor properdin GN=CFP
F1PQ85	Mannan binding lectin serine peptidase 1 GN=MASP1
F1PPG5	Integrin beta GN=ITGB3
A0A5F4CNE2	Cartilage oligomeric matrix protein GN=COMP
A0A5F4DCX2	Uncharacterized protein
F1Q418	Inter-alpha-trypsin inhibitor heavy chain 1 GN=ITIH1
E2R886	Kininogen 1 GN=KNG1
E2RJY0	Potassium channel tetramerization domain containing 12 GN=KCTD12
A0A5F4C5A8	Uncharacterized protein
A0A5F4CHN8	Thrombospondin 4 GN=THBS4
A0A5F4CSP7	Uncharacterized protein
F1PG39	Inter-alpha-trypsin inhibitor heavy chain 2 GN=ITIH2
F1PQ99	Mannan binding lectin serine peptidase 1 GN=MASP1
P33703	Beta-2-glycoprotein 1 GN=APOH
A0A5F4CZV7	Uncharacterized protein
A0A5F4CWL0	Uncharacterized protein GN=CANT1
A0A5F4C0D1	Complement C1q A chain GN=C1QA
A0A5F4DCA5	Uncharacterized protein
E2QY07	Actinin alpha 1 GN=ACTN1
A0A5F4BZM5	Ceruloplasmin GN=CP
A0A5F4BXN3	Gelsolin GN=GSN
F1PKR3	Vinculin GN=VCL
A0A5F4BYK6	Tenascin C GN=TNC
J9NYG8	Complement component 4 binding protein beta GN=C4BPB
A0A5F4DDG2	Myristoylated alanine rich protein kinase C substrate GN=MARCKS
F1PAB0	Uncharacterized protein GN=LOC489647
Q2Z1P8	Anion exchange protein GN=SLC4A1
A0A5F4CBH6	Uncharacterized protein
A0A5F4CIK5	Coagulation factor XIII B chain GN=F13B
A0A5F4D5V1	Fibulin 1 GN=FBLN1
A0A5F4DGD5	Uncharacterized protein
J9NZL6	Reelin GN=RELN
A0A5F4CH63	Uncharacterized protein
F1PBT3	Fructose-bisphosphate aldolase GN=ALDOA
P60524	Hemoglobin subunit beta GN=HBB
E2R0T6	Heat shock protein family A (Hsp70) member 8 GN=HSPA8
P01874	Ig mu chain C region
F1Q253	Spectrin beta chain GN=SPTB
E2R7A3	Complement factor I GN=CFI
F1PKX3	Coagulation factor XIII A chain GN=F13A1
A0A5F4C477	Fibulin 1 GN=FBLN1
E2QSF4	Tubulin beta chain GN=TUBB
F1PRU9	Integrin subunit alpha 2b GN=ITGA2B
J9NSF9	Prothrombin GN=F2
A0A5F4CS96	Uncharacterized protein GN=LOC106557476
L7N0I7	Tubulin beta chain GN=TUBB4B
A0A5F4D3V5	Tubulin beta 1 class VI GN=TUBB1
P02677	Fibrinogen beta chain (Fragment) GN=FGB
F1PEU6	Hemicentin 2 GN=HMCN2
E2RBC3	Tubulin alpha chain GN=TUBA4A
F1PRR4	Vasodilator-stimulated phosphoprotein GN=VASP
A0A5F4BY85	Glycosylphosphatidylinositol specific phospholipase D1 GN=GPLD1
E2R8K8	Uncharacterized protein GN=LOC490399
A0A5F4DAX5	Uncharacterized protein
J9NUI6	Alpha-1-microglobulin/bikunin precursor GN=AMBP
J9NWG4	C-type lectin domain-containing protein GN=MBL2
F1PKN5	Ig-like domain-containing protein
E2QWN7	Lymphocyte cytosolic protein 1 GN=LCP1
A0A5F4CNZ1	Complement C6 GN=C6
E2RNL3	Peroxiredoxin 4 GN=PRDX4
E2RLQ9	Valosin containing protein GN=VCP
F1PZC6	Histidine rich glycoprotein GN=HRG
F1PIC7	Heat shock protein family A (Hsp70) member 5 GN=HSPA5
A0A5F4CJL8	Sushi, von Willebrand factor type A, EGF and pentraxin domain containing 1 GN=SVEP1
F1PUM6	SMB domain-containing protein GN=VTN
E2RFV9	Complement C9 GN=C9
E2RL88	Integrin subunit alpha 6 GN=ITGA6
E2RPW3	Paraoxonase 3 GN=PON3
F1PAQ3	Maltase-glucoamylase GN=MGAM
E2R8A7	Collectin subfamily member 11 GN=COLEC11
A0A5F4CBF2	Tropomyosin 4 GN=TPM4
E2RES2	Serpin family C member 1 GN=SERPINC1
E2RS75	Uncharacterized protein GN=CFB
F1PEN6	Transferrin receptor protein 1 GN=TFRC
A0A5F4CTD0	Alpha-1-B glycoprotein GN=A1BG
P01784	Ig heavy chain V region GOM
F1PZR4	Hemopexin GN=APBB1
J9PAA4	Carboxypeptidase N subunit 2 GN=CPN2
F1PF90	Ig-like domain-containing protein
A0A5F4CZY7	Uncharacterized protein GN=PSMA1
E2RK64	Fermitin family member 3 GN=FERMT3
E2QZN8	Pentraxin 3 GN=PTX3
F1PCE5	Serpin family A member 1 GN=SERPINA1
E2R2F7	Sex hormone binding globulin GN=SHBG
F1PBL1	14_3_3 domain-containing protein GN=YWHAZ
E2QZQ1	Transferrin GN=TF
A0A5F4C451	Uncharacterized protein
Q6QNF4	Hepatocyte growth factor activator GN=HGFAC
A0A5F4DKI9	Coagulation factor VIII GN=F8
A0A5F4DA08	Oncoprotein induced transcript 3 GN=OIT3
E2QZ50	Adenylyl cyclase-associated protein GN=CAP1
F1PR54	Uncharacterized protein GN=LTF
A0A5F4C3X9	Actinin alpha 4 GN=ACTN4
Q28259	Glyceraldehyde-3-phosphate dehydrogenase GN=GAPDH
E2RG01	Complement C7 GN=C7
F1PFM6	Collagen type VI alpha 1 chain GN=COL6A1
F1PR31	Collagen type VI alpha 3 chain GN=COL6A3
F1PZH8	Bridging integrator 2 GN=BIN2
A0A5F4BUJ7	Uncharacterized protein
F1PH61	Ig-like domain-containing protein
J9P4J8	Complement factor H related 5 GN=CFHR5
F1P7W0	Uncharacterized protein GN=SELP
E2R109	Complement C8 alpha chain GN=C8A
A0A5F4CZM1	Quiescin sulfhydryl oxidase 1 GN=QSOX1
F1PYX9	Serpin family G member 1 GN=SERPING1
Q95MP7	Ferritin heavy chain GN=FTH1
E2RMN2	Proteasome subunit alpha type GN=PSMA6
A0A5F4CEP4	Fetuin B GN=FETUB
A0A5F4CUH8	Golgi membrane protein 1 GN=GOLM1
E2QZ19	Serum albumin GN=AFP
F1PUB5	Proteasome endopeptidase complex GN=PSMA7
E2R4V3	Serpin family F member 2 GN=SERPINF2
L7N0E8	Ig-like domain-containing protein
E2RT60	Integrin beta GN=ITGB1
A0A5F4C080	Caldesmon 1 GN=CALD1
E2QWR0	Surfactant protein D GN=SFTPD
E2RNG3	Carboxypeptidase N subunit 1 GN=CPN1
E2R141	Complement C8 beta chain GN=C8B
F1PQN5	Cofilin 1 GN=CFL1
F1PKW7	Tyrosine 3-monooxygenase/tryptophan 5-monooxygenase activation protein beta GN=YWHAB
F1P8N6	Endoplasmin GN=HSP90B1
E2RLS3	Heat shock protein 90 alpha family class B member 1 GN=HSP90AB1
J9P889	Collagen type VI alpha 1 chain GN=COL6A1
F1PP29	Uncharacterized protein
E2RBR6	Proteasome subunit beta GN=PSMB4
F1PGY1	Heat shock protein 90 alpha family class A member 1 GN=HSP90AA1
F1P8T1	Angiopoietin like 6 GN=ANGPTL6
E2R2K4	RAP1B, member of RAS oncogene family GN=RAP1B
J9P028	Glutathione peroxidase GN=GPX3
A0A5F4BUZ8	Transketolase GN=TKT
A0A5F4D721	Tropomyosin 3 GN=TPM3
E2RQF8	Extracellular matrix protein 1 GN=ECM1
F1P7F8	Zyxin GN=ZYX
A0A5F4D4F1	Moesin GN=MSN
F1PF02	Proteasome subunit beta GN=PSMB1
H9GWG4	Inter-alpha-trypsin inhibitor heavy chain 3 GN=ITIH3
J9P6N4	Tyrosine 3-monooxygenase/tryptophan 5-monooxygenase activation protein eta GN=YWHAH
J9P064	Collectin subfamily member 10 GN=COLEC10
E2RPB8	C-type lectin domain family 3 member B GN=CLEC3B
F1P679	Actin related protein 3 GN=ACTR3
A0A5F4CWA9	Proteasome subunit alpha 2 GN=PSMA2
A0A5F4CAX2	Uncharacterized protein
E2QSZ5	Coronin GN=CORO1A
E2QX53	Glucosamine-6-phosphate isomerase GN=GNPDA1
E2R5H4	Integrin linked kinase GN=ILK
F1PNR5	Coagulation factor XI GN=F11
P05124	Creatine kinase B-type GN=CKB
J9NX65	Uncharacterized protein GN=SBSN
Q28256	Platelet glycoprotein Ib alpha chain GN=GP1BA
Q7YQC6	Heat shock 70 kDa protein 1 GN=HSPA1
F1PVW0	L-lactate dehydrogenase GN=LDHA
F1P9U4	Dihydropyrimidinase like 2 GN=DPYSL2
E2RGG9	Tryptophanyl-tRNA synthetase GN=WARS1
F1PLR6	Bridging integrator 1 GN=BIN1
O97492	Catalase GN=CAT
E2QW82	Matrix metallopeptidase 19 GN=MMP19
E2RPC6	Proteasome subunit beta GN=PSMB7
F1PW10	Transforming growth factor beta induced GN=TGFBI
Q5W416	Proteasome subunit beta type-8 GN=PSMB8
F1PXF9	Hemicentin 1 GN=HMCN1
A0A5F4DFV6	Fc receptor like 4 GN=FCRL4
F1Q317	Galectin GN=LGALS9
E2R5U8	Transthyretin GN=TTR
E2QZ98	Angiopoietin like 3 GN=ANGPTL3
A0A5F4DFV1	Apolipoprotein C-III GN=APOC3
E2QX17	Proteasome subunit beta GN=PSMB3
J9P416	Tenascin N GN=TNN
E2R3R2	Proteasome subunit beta GN=PSMB5
F1Q094	Platelet-activating factor acetylhydrolase GN=PLA2G7
F1PB77	Alpha-1,4 glucan phosphorylase GN=PYGL
F1Q432	Tenascin XB GN=TNXB
E2RKR4	Proteasome subunit alpha type GN=PSMA3
E2RNL8	Apolipoprotein D GN=APOD
F1PGD4	Neural EGFL like 2 GN=NELL2
A0A5F4CHH4	Pleckstrin GN=PLEK
A0A5F4CUQ1	Tropomyosin 1 GN=TPM1
F1PXX1	EH domain containing 3 GN=EHD3
L7N0I1	Uncharacterized protein GN=MYL12B
F1PPL9	C1q domain-containing protein GN=C1QTNF3
A0A5F4BQ47	Phospholipid transfer protein GN=PLTP
A0A5F4CLP4	Uncharacterized protein GN=LOC609365
P54714	Triosephosphate isomerase GN=TPI1
F1PDG4	Uncharacterized protein GN=UBB
F1Q3I5	Collagen alpha-1(I) chain GN=COL1A1
A0A5F4DGJ6	Parvin beta GN=PARVB
J9PBI1	LIM and senescent cell antigen-like-containing domain protein GN=LIMS1
F6UYJ9	Calreticulin GN=CALR
P01785	Ig heavy chain V region MOO
A0A5F4CED7	Retinol binding protein 4 GN=RBP4
F1PH87	Serpin family A member 3 GN=SERPINA3
E2QW60	Lectin, mannose binding 1 GN=LMAN1
A0A5F4C8U9	Uncharacterized protein
F1P634	Myosin light chain 9 GN=MYL9
E2RD86	Protein disulfide-isomerase GN=PDIA3
A0A5F4CT62	Uncharacterized protein GN=YWHAQ
A0A5F4C8H0	Glucosamine-6-phosphate deaminase 2 GN=GNPDA2
F1PQS3	F-actin-capping protein subunit beta GN=CAPZB
A0A5F4BTV9	Aldolase, fructose-bisphosphate B GN=ALDOB
F1PBJ3	Uncharacterized protein GN=LMNA
A0A5F4DKK2	Attractin GN=ATRN
J9NRH5	Tyrosine 3-monooxygenase/tryptophan 5-monooxygenase activation protein gamma GN=YWHAG
F1PHD0	Carboxyl ester lipase GN=CEL
E2QUY9	ADAM metallopeptidase with thrombospondin type 1 motif 13 GN=ADAMTS13
A0A5F4D2T1	Actin related protein 2/3 complex subunit 1B GN=ARPC1B
A0A5F4D8D4	Aspartyl aminopeptidase GN=DNPEP
E2RQ71	Apolipoprotein M GN=APOM
F1PQS2	Metalloproteinase inhibitor 1 GN=TIMP1
A0A5F4CTQ3	LRR binding FLII interacting protein 1 GN=LRRFIP1
P38400	Guanine nucleotide-binding protein G(i) subunit alpha-2 GN=GNAI2
E2R4H4	Proteasome endopeptidase complex GN=PSMA5
F1PK62	Peptidyl-prolyl cis-trans isomerase
E2QXY7	Actin-related protein 2 GN=ACTR2
F1PBN7	ADAMTS like 2 GN=ADAMTSL2
E2R5Q1	Calponin GN=CNN2
P62872	Guanine nucleotide-binding protein G(I)/G(S)/G(T) subunit beta-1 GN=GNB1
A0A5F4DCJ3	WD repeat domain 1 GN=WDR1
A0A5F4CR91	Basigin GN=BSG
E2R0B6	Proteasome subunit beta GN=PSMB6
E2R7N4	Hematopoietic cell-specific Lyn substrate 1 GN=HCLS1
J9P346	SCY domain-containing protein GN=PPBP
E2RSI6	FERM domain-containing protein GN=EZR
P56595	Apolipoprotein C-I GN=APOC1
J9P732	EF-hand domain-containing protein GN=S100A9
J9P5P9	Apolipoprotein B receptor GN=APOBR
L7N0E7	Ig-like domain-containing protein
A0A5F4C819	Leukotriene A4 hydrolase GN=LTA4H
F1P7P3	F-actin-capping protein subunit alpha GN=CAPZA1
F1PKB2	Alpha-mannosidase GN=MAN2B1
A0A5F4D0L8	Septin 6 GN=SEPTIN6
A0A5F4C6Q3	Amine oxidase copper containing 3 GN=AOC3
F1P8B4	Calnexin GN=CANX
E2RA67	C-C motif chemokine GN=CCL14
J9P983	Exostosin like glycosyltransferase 2 GN=EXTL2
F1PHK9	Laminin subunit gamma 1 GN=LAMC1
J9P3M1	LIM and SH3 protein 1 GN=LASP1
F1PHQ0	Clathrin heavy chain GN=CLTC
F1PEK5	Septin 2 GN=SEPTIN2
E2R1N7	Prenylcysteine oxidase 1 GN=PCYOX1
F6USM4	Mannan binding lectin serine peptidase 2 GN=MASP2
A0A5F4D3V6	Integrin subunit beta 2 GN=ITGB2
F1Q1K9	Hyaluronan binding protein 2 GN=HABP2
E2QUU5	60 kDa heat shock protein, mitochondrial GN=HSPD1
E2R5J0	Pentaxin GN=CRP
F1P6A2	Matrix metalloproteinase-9 GN=MMP9
E2RGF3	Na(+)/H(+) exchange regulatory cofactor NHE-RF GN=SLC9A3R1
L7N0E5	Ig-like domain-containing protein
F1Q1Q0	Coronin GN=CORO1C
E2R9D2	Coagulation factor XII GN=F12
A0A5F4CPW0	Tyrosine 3-monooxygenase/tryptophan 5-monooxygenase activation protein epsilon GN=YWHAE
E2QXN8	Annexin GN=ANXA11
F1PKL6	Ig-like domain-containing protein
J9P2K0	Fibulin 2 GN=FBLN2
F1PKY3	Adenosine deaminase GN=ADA
A0A5F4C4W3	Uncharacterized protein
A0A5F4BSL9	Uncharacterized protein
E2QUV3	Alpha 2-HS glycoprotein GN=AHSG
E2QXA6	Calpastatin GN=CAST
E2RNG2	ATP synthase subunit alpha GN=ATP5F1A
A0A5F4CKE9	Uncharacterized protein GN=MAP4
F1PZA0	Delta-aminolevulinic acid dehydratase GN=ALAD
E2RRC9	Phosphoglycerate kinase GN=PGK1
F1PTZ5	CD44 antigen GN=CD44
E2RSE5	Dihydropyrimidinase GN=DPYS
F1Q4J0	Glucosidase II alpha subunit GN=GANAB
F1PQ52	Myeloperoxidase GN=MPO
F1PNS6	Peptidase D GN=PEPD
J9NYN2	Cysteine and glycine rich protein 1 GN=CSRP1
E2RQY6	Calcium-transporting ATPase GN=ATP2A3
A0A5F4CW76	ATP synthase subunit beta, mitochondrial GN=ATP5F1B
A0A5F4CWQ9	Uncharacterized protein
A0A5F4CE33	Triggering receptor expressed on myeloid cells 2 GN=TREM2
E2RD95	G protein subunit beta 2 GN=GNB2
J9NX46	Clathrin light chain A GN=CLTA
A0A5F4D0B9	EGF containing fibulin extracellular matrix protein 1 GN=EFEMP1
J9NT73	Brain abundant membrane attached signal protein 1 GN=BASP1
J9NTL5	Glycoprotein Ib platelet subunit beta GN=GP1BB
F1Q057	Peroxidasin GN=PXDN
A0A5F4D0H5	SRC proto-oncogene, non-receptor tyrosine kinase GN=SRC
E2RD65	Actin-related protein 2/3 complex subunit 5 GN=ARPC5
Q53VB8	Ferritin light chain GN=FTL
F1Q2D2	Glutathione synthetase GN=GSS
J9NZX7	Malic enzyme GN=ME1
A0A5F4BYG4	Spectrin alpha, non-erythrocytic 1 GN=SPTAN1
J9NY79	Malate dehydrogenase
E2R516	Synaptosomal-associated protein GN=SNAP23
F1PNV5	Coagulation factor XI GN=KLKB1
E2RS79	Complement C2 GN=C2
F1PP71	F11 receptor GN=F11R
E2RMT7	GMP reductase GN=GMPR
E2RT39	Maltase-glucoamylase 2 (putative) GN=MGAM2
E2RE03	Cadherin 5 GN=CDH5
E2RT65	Phosphoglycerate mutase GN=PGAM1
E2RAF1	Uncharacterized protein GN=CKMT1A
E2RGB0	Apolipoprotein C4 GN=APOC4
E2R0D2	Scavenger receptor cysteine rich family member with 5 domains GN=SSC5D
F1PIF2	Cathepsin Z GN=CTSZ
A0A5F4CC39	Elastin microfibril interfacer 1 GN=EMILIN1
F1PD51	Erythrocyte membrane protein band 4.2 GN=EPB42
F1PPR8	Beta-glucuronidase GN=GUSB
E2QW34	Proteasome subunit beta GN=PSMB2
E2RLN1	Serpin family D member 1 GN=SERPIND1
A0A5F4DH03	Coagulation factor X GN=F10
A0A5F4DJ85	Rho GDP dissociation inhibitor alpha GN=ARHGDIA
E2RPA8	Tetraspanin GN=CD151
Q2TFN9	Heat shock 70 kDa protein 4 GN=HSPA4
F1PEM7	Insulin like growth factor binding protein 2 GN=IGFBP2
Q5W412	Proteasome subunit beta GN=PSMB9
F1PCG4	Peroxiredoxin 2 GN=PRDX2
E2R7E8	Acylaminoacyl-peptide hydrolase GN=APEH
G1K2D7	Coagulation factor IX GN=F9
A0A5F4DDK9	Purine nucleoside phosphorylase GN=PNP
F6XKC0	Complement C8 gamma chain GN=C8G
A0A5F4CY61	Uncharacterized protein
F6UY11	Proteasome activator subunit 1 GN=PSME1
F6XY66	Transforming protein RhoA GN=RHOA
Q28288	Syntaxin-binding protein 2 GN=STXBP2
E2RTE8	6-pyruvoyltetrahydropterin synthase GN=PTS
Q28260	Vascular cell adhesion protein 1 GN=VCAM1
F1PD77	Proteasome activator subunit 2 GN=PSME2
E2QUY1	RAS p21 protein activator 3 GN=RASA3
J9P5M2	Lymphocyte specific protein 1 GN=LSP1
E2RMF9	Serpin family A member 5 GN=SERPINA5
A0A5F4D8A3	Low density lipoprotein receptor GN=LDLR
A0A5F4C175	Platelet and endothelial cell adhesion molecule 1 GN=PECAM1
A0A5F4DIK8	Four and a half LIM domains 1 GN=FHL1
F1PXG0	Sorbitol dehydrogenase GN=SORD
F1PI70	Transforming growth factor beta GN=TGFB1
J9P3W8	Nicotinate phosphoribosyltransferase GN=NAPRT
F1PCM9	SH3 domain containing GRB2 like, endophilin B1 GN=SH3GLB1
E2R7L1	Protein disulfide-isomerase A4 GN=PDIA4
A0A5F4DJ87	Prolyl 4-hydroxylase subunit beta GN=P4HB
F1PZA1	Isocitrate dehydrogenase [NADP] GN=IDH1
J9NXY7	PDZ and LIM domain 1 GN=PDLIM1
E2RB37	Protein disulfide isomerase family A member 6 GN=PDIA6
P62999	Ras-related C3 botulinum toxin substrate 1 GN=RAC1
E2QV08	Malate dehydrogenase GN=MDH1
F1P719	EH domain containing 4 GN=EHD4
A0A5F4CP88	Protein tyrosine phosphatase receptor type C GN=PTPRC
E2QX19	Macrophage stimulating 1 GN=MST1
F1PKI4	Chloride intracellular channel protein GN=CLIC1
E2RMC1	ST13 Hsp70 interacting protein GN=ST13
A0A5F4CXZ9	Uncharacterized protein GN=MYL6
F6UZV8	Calpain 1 GN=CAPN1
Q1HE58	Ras-related protein Rab-27A GN=RAB27A
E2R413	Capping actin protein, gelsolin like GN=CAPG
E2R0P3	Isochorismatase domain containing 1 GN=ISOC1
F1PAG6	Arp2/3 complex 34 kDa subunit GN=ARPC2
F1Q2J4	Notch receptor 3 GN=NOTCH3
A4GT58	Cdc42 GTPase-activating protein GN=ARHGAP1
A0A5F4D6J0	Protocadherin 1 GN=PCDH1
F1PDY8	Carbonic anhydrase 2 GN=CA2
A0A5F4DCB6	Nucleosome assembly protein 1 like 1 GN=NAP1L1
A0A5F4BU46	Uncharacterized protein
J9P7X2	Ig-like domain-containing protein GN=THY1
A0A5F4C041	Uncharacterized protein GN=FOLR2
F1PS47	RAN binding protein 3 GN=RANBP3
E2RJW7	Adducin 1 GN=ADD1
A0A5F4BSQ8	Karyopherin subunit beta 1 GN=KPNB1
F1P7V6	Stress induced phosphoprotein 1 GN=STIP1
A0A5F4D182	Serine hydroxymethyltransferase 1 GN=SHMT1
Q8HZM5	Glutamine synthetase GN=GLUL
E2R574	Uncharacterized protein GN=EEF1G
A0A5F4D061	Solute carrier family 2, facilitated glucose transporter member 3 GN=SLC2A3
F1PQ91	Insulin like growth factor binding protein 3 GN=IGFBP3
A0A5F4CJ02	Esterase D GN=ESD
J9PA20	Uncharacterized protein
E2QTA2	Papilin, proteoglycan like sulfated glycoprotein GN=PAPLN
F1PXU1	Spectrin beta chain GN=SPTBN1
F1P983	Protein tyrosine phosphatase receptor type J GN=PTPRJ
A0A5F4C1B3	Transgelin 2 GN=TAGLN2
F1PAF2	Activating transcription factor 6 GN=ATF6
F6UXI8	Inosine-5'-monophosphate dehydrogenase GN=IMPDH2
J9P7Y9	Uncharacterized protein
L7N0L3	Histone H4
E2RAK7	Apolipoprotein A-II GN=APOA2
E2R6K5	Histone H3 GN=GALK1
F6Y713	Alpha-1-acid glycoprotein GN=LOC100685620
E2RLK6	Adiponectin F1 GN=LOC609026
E2R985	Actin-related protein 2/3 complex subunit 3 GN=ARPC3
F1PAL5	Angiotensinogen GN=AGT
F1PYM4	Insulin like growth factor binding protein acid labile subunit GN=IGFALS
A0A5F4DBI9	Vesicle associated membrane protein 3 GN=VAMP3
F1PEG6	Docking protein 2 GN=DOK2
A0A5F4BTS3	WASP actin nucleation promoting factor GN=WAS
J9P7R7	Shootin 1 GN=SHTN1
F1PDQ2	Dematin actin binding protein GN=DMTN
F2Z4Q7	Serpin family F member 1 GN=SERPINF1
Q28294	Guanine nucleotide-binding protein G(q) subunit alpha GN=GNAQ
E2R115	CD226 molecule GN=CD226
A0A5F4D491	Dihydrolipoamide S-succinyltransferase GN=DLST
A0A5F4DBF8	ATPase H+ transporting V0 subunit a1 GN=ATP6V0A1
A0A5F4D9M4	Uncharacterized protein GN=ARF3
A0A5F4CAZ7	Sodium/potassium-transporting ATPase subunit alpha-1 GN=ATP1A1
J9NX73	Uncharacterized protein GN=RPIA
E2RBB8	Tyrosine-protein kinase GN=LYN
F1PB66	Tetraspanin GN=CD81
F1PHY1	Collagen alpha-2(I) chain GN=COL1A2
F1PD34	Secreted phosphoprotein 2 GN=SPP2
J9P9M0	RAB32, member RAS oncogene family GN=RAB32
A0A5F4DER9	Aquaporin-1 GN=AQP1
E2QYX1	Phosphoglycerate mutase GN=BPGM
A0A5F4BRR8	Stomatin GN=STOM
F1PL20	Serine incorporator 1 GN=SERINC1
F1PHN8	Serpin family A member 4 GN=SERPINA4
A0A5F4CCD0	Cysteine rich secretory protein 2 GN=CRISP2
A0A5F4CE41	Uncharacterized protein
F1Q0H0	N(alpha)-acetyltransferase 10, NatA catalytic subunit GN=NAA10
P60952	Cell division control protein 42 homolog GN=CDC42
P18470	DLA class II histocompatibility antigen, DR-1 beta chain
A0A5F4CSM6	Cell division cycle 37 GN=CDC37
E2R0M4	N-acetylglucosamine-1-phosphate transferase subunit gamma GN=GNPTG
A0A5F4C290	Septin 9 GN=SEPTIN9
P12278	Apolipoprotein C-II GN=APOC2
F1P9Q2	SH3 domain containing kinase binding protein 1 GN=SH3KBP1
F1PPH7	Proteasome 26S subunit, ATPase 2 GN=PSMC2
P62825	GTP-binding nuclear protein Ran GN=RAN
F1Q313	Homogentisate 1,2-dioxygenase GN=HGD
A0A5F4CNX1	AHNAK nucleoprotein GN=AHNAK
P18067	Ras-related protein Rab-7a GN=RAB7A
F6XNH4	Methylenetetrahydrofolate dehydrogenase, cyclohydrolase and formyltetrahydrofolate synthetase 1 GN=MTHFD1
A0A5F4BUK5	Integrin subunit alpha 2 GN=ITGA2
F1PIT4	Tetraspanin GN=CD63
F1PB85	Serpin family A member 7 GN=SERPINA7
E2RH46	Uncharacterized protein
J9NST4	SelP_N domain-containing protein GN=SELENOP
J9PB28	Fibrinogen like 2 GN=FGL2
E2RII4	EMAP like 2 GN=EML2
F1PG69	Collagen type III alpha 1 chain GN=COL3A1
E2QW61	Lipopolysaccharide binding protein GN=LBP
F6XYK7	Adducin 2 GN=ADD2
A0A5F4C3T9	Phosphatidylcholine transfer protein GN=PCTP
A0A5F4D8T6	Uncharacterized protein GN=PAICS
A0A5F4D6V1	Carboxypeptidase B2 GN=CPB2
A0A5F4CN31	Glucose-6-phosphate isomerase GN=GPI
E2QXS7	Adenosylhomocysteinase GN=AHCY
J9NTG7	CD55 molecule GN=CD55
F1PR87	Pleckstrin homology domain containing O2 GN=PLEKHO2
A0A5F4D2Z7	Casein kinase 1 gamma 1 GN=CSNK1G1
J9P3J4	Uncharacterized protein GN=SLC29A1
F1P9L1	S-methyl-5'-thioadenosine phosphorylase GN=MTAP
J9P3H7	UBA domain-containing protein GN=DDI2
F1PIV8	EF-hand domain family member D2 GN=EFHD2
E2QVU9	Biliverdin reductase B GN=BLVRB
E2RPJ4	Glutamate-cysteine ligase catalytic subunit GN=GCLC
E2R857	Bleomycin hydrolase GN=BLMH
F1PC59	Peroxiredoxin 6 GN=PRDX6
E2RI17	Sorcin GN=SRI
A0A5F4CLF7	Calmodulin 1 GN=CALM1
F1P795	RAS guanyl releasing protein 2 GN=RASGRP2
A0A5F4D0M8	Calpain 5 GN=CAPN5
F1PQ46	Anoctamin GN=ANO6
A0A5F4CPQ6	Chaperonin containing TCP1 subunit 8 GN=CCT8
F1PE09	6-phosphogluconate dehydrogenase, decarboxylating GN=PGD
A0A5F4CKY1	A-kinase anchoring protein 12 GN=AKAP12
J9P988	CD38 molecule GN=CD38
A0A5F4CYD3	Coenzyme Q10B GN=COQ10B
F1Q260	Lysosomal associated membrane protein 1 GN=LAMP1
F6Y5Z5	EF-hand calcium binding domain 8 GN=EFCAB8
E2RCI8	Annexin GN=ANXA6
F1P914	Uncharacterized protein GN=MVP
A0A5F4BRV8	Uncharacterized protein GN=VIM
E2R034	Molybdopterin molybdenumtransferase GN=GPHN
A0A5F4CUP0	Poly(A) binding protein cytoplasmic 1 GN=PABPC1

## Sheet: Unique CanL
Acession number	Description	Peptides	PSMs	Unique peptides
A0A5F4D1B8	Uncharacterized protein	9	2205	2
A0A5F4DDL4	Uncharacterized protein	8	2178	2
A0A5F4BTN9	Uncharacterized protein	6	1484	2
A0A5F4C2R6	Uncharacterized protein	8	1104	3
A0A5F4C493	Uncharacterized protein	5	1083	2
E2R5W6	GC vitamin D binding protein GN=GC	21	570	21
A0A5F4D071	Uncharacterized protein	3	453	2
A0A5F4DJC7	Uncharacterized protein	10	427	2
A0A5F4D572	Uncharacterized protein	5	392	5
A0A5F4BSV4	Uncharacterized protein GN=FBN1	45	367	45
A0A5S6CZL3	Apolipoprotein A-IV GN=APOA4	8	361	4
A0A5F4D0A9	Uncharacterized protein GN=LOC484960	39	356	39
J9P3L5	Ig-like domain-containing protein	3	349	2
A0A5F4BNS1	Filamin C GN=FLNC	29	193	17
F1PL63	Fructose-bisphosphate aldolase GN=ALDOC	8	184	6
A0A5F4CP02	Uncharacterized protein GN=PKM	13	169	12
F1PRD8	Ankyrin 1 GN=ANK1	26	167	26
L7N049	Ig-like domain-containing protein GN=DLA88	11	145	2
J9P0D4	Ig-like domain-containing protein	3	140	2
A0A5F4DCD2	Uncharacterized protein GN=DLA-64	9	131	2
A0A5F4C8G1	Ras suppressor protein 1 GN=RSU1	9	118	9
E2QYM7	Thrombospondin 3 GN=THBS3	8	115	7
J9NT12	Fibrinogen like 1 GN=FGL1	9	67	9
F1PS94	Notch receptor 2 GN=NOTCH2	13	66	13
O97555	Rab GDP dissociation inhibitor alpha GN=GDI1	10	65	10
A0A5F4DGY6	FAT atypical cadherin 1 GN=FAT1	26	62	26
E2R5E9	TR_THY domain-containing protein	3	62	3
F1PDC7	Notch receptor 1 GN=NOTCH1	13	60	13
A0A5F4CR47	Nidogen 1 GN=NID1	7	56	7
A0A5F4DBL7	LDL receptor related protein 1 GN=LRP1	17	55	17
E2R3B0	Secretogranin III GN=SCG3	12	55	12
A0A5F4C3J1	Uncharacterized protein	5	53	2
A0A5F4CTU1	Septin 7 GN=SEPTIN7	6	52	5
A0A5F4CK68	Versican GN=VCAN	9	51	9
P62490	Ras-related protein Rab-11A GN=RAB11A	4	47	4
E2R7N5	Coronin GN=CORO1B	7	45	7
J9NYN4	Uncharacterized protein GN=TGOLN2	4	35	4
J9NX00	Thyroglobulin GN=TG	17	34	17
E2RKG6	Dermokine GN=DMKN	5	34	5
P81709	Lysozyme C, spleen isozyme	4	34	4
F6X4P9	Solute carrier family 38 member 10 GN=SLC38A10	13	33	13
F1P8F7	Solute carrier family 16 member 7 GN=SLC16A7	2	33	2
Q6TN20	Cathelicidin GN=CAMP	4	29	4
Q2PT31	Myocilin GN=MYOC	9	28	9
A0A5F4C710	Heparan sulfate proteoglycan 2 GN=HSPG2	5	28	5
E2RBA8	PDZ and LIM domain 5 GN=PDLIM5	6	27	6
F1P6U6	Cadherin 11 GN=CDH11	4	26	4
A0A5F4CGU2	Pyruvate kinase PKLR GN=PKLR	4	25	3
E2RKK6	Protein kinase C substrate 80K-H GN=PRKCSH	3	25	3
A0A5F4CI63	Latent transforming growth factor beta binding protein 1 GN=LTBP1	7	24	7
F1Q3Y2	Dihydropyrimidinase like 3 GN=DPYSL3	5	24	2
E2RGD3	Twinfilin actin binding protein 2 GN=TWF2	6	23	5
J9P870	Insulin like growth factor binding protein 6 GN=IGFBP6	6	22	6
A0A5F4CB57	Tissue alpha-L-fucosidase GN=FUCA1	6	22	6
A0A5F4BXK6	Carboxylesterase 5A GN=CES5A	5	22	5
A0A5F4BUM0	Uncharacterized protein GN=LOC607460	7	21	7
F1PGR0	ADAM metallopeptidase domain 10 GN=ADAM10	3	19	3
J9P153	Latent transforming growth factor beta binding protein 2 GN=LTBP2	6	18	6
A0A5F4CSJ2	Protein tyrosine phosphatase receptor type F GN=PTPRF	4	18	4
A0A5F4DBN6	Glutathione-disulfide reductase GN=GSR	3	18	3
F1Q185	Ig-like domain-containing protein	2	18	2
E2QYN4	ATP synthase inhibitory factor subunit 1 GN=ATP5IF1	2	18	2
E2RLY5	Leucine aminopeptidase 3 GN=LAP3	8	17	8
E2RRR2	Hydroxysteroid 17-beta dehydrogenase 14 GN=HSD17B14	5	17	5
J9NYQ3	Acid sphingomyelinase-like phosphodiesterase GN=SMPDL3A	4	17	4
A0A5F4C7I2	Family with sequence similarity 71 member F1 GN=FAM71F1	4	17	4
E2QWU0	Actin-related protein 2/3 complex subunit 4 GN=ARPC4	3	17	3
J9NVT2	Hypoxanthine phosphoribosyltransferase GN=HPRT1	2	17	2
A0A5F4BX14	Mannose-6-phosphate receptor, cation dependent GN=M6PR	3	16	3
A0A5F4C4Q1	Beta-2-microglobulin GN=B2M	2	16	2
F1PAA9	Cadherin-1 GN=CDH1	6	15	6
A0A5F4CXK5	Ectonucleotide pyrophosphatase/phosphodiesterase 2 GN=ENPP2	6	15	6
A0A5F4DIU8	Uncharacterized protein GN=FUBP1	5	15	5
A0A5F4C634	Sarcoplasmic/endoplasmic reticulum calcium ATPase 2 GN=ATP2A2	4	15	2
A0A5F4C654	Protein kinase cAMP-dependent type II regulatory subunit beta GN=PRKAR2B	3	14	3
H9GWE2	Uncharacterized protein	4	13	4
E2RKR9	Proteasome subunit beta GN=PSMB10	3	13	3
A0A5F4CAX8	Uncharacterized protein	2	13	2
F1PIP7	Collagen type VII alpha 1 chain GN=COL7A1	4	12	4
A0A5F4C8J6	Ubiquitin specific peptidase 14 GN=USP14	2	12	2
A0A5F4CA83	LRR binding FLII interacting protein 2 GN=LRRFIP2	4	11	3
A0A5F4DAB6	Protein tyrosine phosphatase non-receptor type 12 GN=PTPN12	2	11	2
F1PHP1	Thioredoxin domain containing 5 GN=TXNDC5	2	11	2
E2QZQ9	Activating transcription factor 6 beta GN=ATF6B	2	11	2
A0A5F4D856	Proline-serine-threonine phosphatase interacting protein 1 GN=PSTPIP1	2	11	2
F1PVR5	Uncharacterized protein	5	10	5
E2RJK1	SH3 domain binding protein 1 GN=SH3BP1	5	10	5
J9NVF6	Uncharacterized protein GN=CEACAM28	4	10	4
A0A5F4DF90	P21 (RAC1) activated kinase 2 GN=PAK2	4	10	4
A0A5F4CXX0	Reticulon 3 GN=RTN3	3	10	3
A0A5F4D8H7	MIA SH3 domain ER export factor 3 GN=MIA3	3	10	3
F1PAK0	Cathepsin S GN=CTSS	2	10	2
E2RSJ3	LIM domain containing preferred translocation partner in lipoma GN=LPP	2	10	2
F1PNI8	Pro-interleukin-16 GN=IL16	5	9	5
F1PR80	Serine peptidase inhibitor, Kazal type 5 GN=SPINK5	4	9	4
E2QT84	Beta-ureidopropionase 1 GN=UPB1	3	9	3
A0A5F4DIQ4	Superoxide dismutase 3 GN=SOD3	3	9	3
F1PGZ1	Beta-1,4-galactosyltransferase 1 GN=B4GALT1	3	9	3
A0A5F4C3F2	Carbonic anhydrase 1 GN=CA1	2	9	2
A0A5F4C8H4	Archain 1 GN=ARCN1	2	9	2
F6V5M4	Nuclear distribution C, dynein complex regulator GN=NUDC	2	9	2
A0A5F4CNG7	Desmoplakin GN=DSP	5	8	5
A0A5F4BUN7	Fructose-bisphosphatase 1 GN=FBP1	4	8	4
A0A5F4DI49	Glycyl-tRNA synthetase GN=GARS1	4	8	4
G1K299	Beta-glucuronidase GN=GUSB	3	8	3
A0A5F4D168	Serum amyloid A protein GN=SAA1	3	8	3
J9NWI6	Dynactin subunit 1 GN=DCTN1	3	8	3
A0A5F4C9I1	Annexin A2 GN=ANXA2	2	8	2
A0A5F4DFK8	Aconitase 2 GN=ACO2	2	8	2
A0A5F4CYM9	Annexin A5 GN=ANXA5	4	7	4
E2R231	Dickkopf WNT signaling pathway inhibitor 3 GN=DKK3	4	7	4
A0A5F4CZM2	Stromal interaction molecule 1 GN=STIM1	3	7	3
F1PMK7	Matrix metallopeptidase 2 GN=MMP2	3	7	3
F1PJM1	Fibulin 5 GN=FBLN5	3	7	3
J9JHP2	Histone H2A	2	7	2
F1Q3Z2	Murine retrovirus integration site 1 homolog GN=MRVI1	2	7	2
E2REP3	Matrix Gla protein GN=MGP	2	7	2
J9P4I5	Nucleoside diphosphate kinase	2	7	2
A0A5F4C5N1	Hexose-6-phosphate dehydrogenase/glucose 1-dehydrogenase GN=H6PD	6	6	6
F1P703	Niban apoptosis regulator 1 GN=NIBAN1	4	6	4
E2QX82	Protocadherin 12 GN=PCDH12	3	6	3
H9GW63	CS domain-containing protein GN=LOC608096	3	6	3
F1P6E4	Thromboxane A synthase 1 GN=TBXAS1	3	6	3
A0A5F4DHM9	Inositol polyphosphate-5-phosphatase D GN=INPP5D	2	6	2
A0A5F4C709	ATP binding cassette subfamily B member 6 GN=ABCB6	2	6	2
F1P9P7	Stromal cell derived factor 4 GN=SDF4	2	6	2
J9NRT0	Alpha-mannosidase GN=MAN2A1	2	6	2
F1PU24	Uncharacterized protein GN=LOC102153864	2	6	2
J9P749	Tight junction protein ZO-2 GN=TJP2	2	6	2
J9PBE6	Glutamic--pyruvic transaminase GN=GPT	2	6	2
C0LQL0	Protein S100 GN=S100A8	4	5	4
A0A5F4D2W4	Uncharacterized protein GN=DLA-79	3	5	3
E2R9Y4	Guanylate binding protein family member 6 GN=GBP6	3	5	3
A0A5F4CZB6	Acyl-CoA synthetase short chain family member 1 GN=ACSS1	3	5	3
E2RMA7	Dynein cytoplasmic 1 intermediate chain 2 GN=DYNC1I2	2	5	2
J9P3G1	Lamin B1 GN=LMNB1	3	5	2
A0A5F4BRK1	Prostaglandin G/H synthase 1 GN=PTGS1	2	5	2
F1PCD8	Laminin subunit beta 1 GN=LAMB1	3	4	3
F6X6J3	ST8 alpha-N-acetyl-neuraminide alpha-2,8-sialyltransferase 4 GN=ST8SIA4	2	4	2
J9NZ55	Nicotinate-nucleotide pyrophosphorylase [carboxylating] GN=QPRT	2	4	2
F1Q4F1	Oxysterol-binding protein GN=OSBP	2	4	2
A0A5F4CGH7	Protein phosphatase 2 scaffold subunit Aalpha GN=PPP2R1A	2	4	2
A0A5F4DLF5	Titin GN=TTN	2	4	2
H9GWB5	SRCR domain-containing protein	3	3	3
J9PAQ5	Protein S100 GN=S100A12	2	3	2
E2R7T5	Arachidonate 15-lipoxygenase GN=ALOX15	2	3	2
E2RIF3	Transgelin GN=TAGLN	2	3	2
A0A5F4C6X4	Dihydrolipoyl dehydrogenase, mitochondrial GN=DLD	2	2	2
F1PV45	Titin GN=TTN	2	2	2
F6X6A0	C-type lectin domain containing 11A GN=CLEC11A	2	2	2
F1Q2F7	Collagen type VI alpha 5 chain GN=COL6A5	2	2	2
E2RKJ1	Cell cycle and apoptosis regulator 2 GN=CCAR2	2	2	2
F1PPE5	Biorientation of chromosomes in cell division 1 like 1 GN=BOD1L1	2	2	2
F1PVP6	Uncharacterized protein GN=CGREF1	2	2	2

## Sheet: Unique Healthy
Acession number	Description	Peptides	PSMs	Unique peptides
A0A5F4D5S9	Fibronectin GN=FN1	113	10568	6
F1PYZ1	GLOBIN domain-containing protein GN=LOC609402	19	3882	2
P60529	Hemoglobin subunit alpha GN=HBA	11	1911	2
Q6Q7P4	Protein 4.1 GN=EPB41	37	1327	4
F1P841	GC vitamin D binding protein GN=GC	27	1258	20
J9P7E1	Protein 4.1 GN=EPB41	38	1227	5
A0A5F4CQG9	Uncharacterized protein	6	1106	2
A0A5F4CI22	Uncharacterized protein	6	1102	2
A0A5F4D8U5	Actin beta like 2 GN=ACTBL2	11	772	2
F1P707	Uncharacterized protein GN=LOC484960	48	525	48
F1PBK6	Carbonic anhydrase 1 GN=CA1	13	431	13
E2QX84	Heat shock protein family A (Hsp70) member 2 GN=HSPA2	15	389	6
E2R2M7	RAP1A, member of RAS oncogene family GN=RAP1A	11	308	3
F1PVP9	RAB1B, member RAS oncogene family GN=RAB1B	11	266	4
A0A5F4CMS7	Uncharacterized protein GN=KRT14	16	261	2
E2R4Q1	LDL receptor related protein 1 GN=LRP1	70	242	70
A0A5F4C9L8	Programmed cell death 6 interacting protein GN=PDCD6IP	29	240	29
P62822	Ras-related protein Rab-1A GN=RAB1A	11	212	4
E2R5R9	UTP--glucose-1-phosphate uridylyltransferase GN=UGP2	24	201	24
A7VLI5	Glycophorin C GN=Gypc	3	201	3
P61007	Ras-related protein Rab-8A GN=RAB8A	7	197	5
F1PRH1	ATP binding cassette subfamily B member 6 GN=ABCB6	19	189	19
P51147	Ras-related protein Rab-5C GN=RAB5C	10	185	7
F1P8L7	Rab GDP dissociation inhibitor GN=GDI2	19	184	11
A0A5F4CP54	Uncharacterized protein	4	178	4
J9JHN1	RAB11B, member RAS oncogene family GN=RAB11B	11	178	2
E2R761	L-lactate dehydrogenase GN=LDHB	14	173	13
A0A5F4CYB6	Uncharacterized protein GN=PKM	19	167	2
E2R9R1	Ras suppressor protein 1 GN=RSU1	14	164	14
F1PNH6	Selenium binding protein 1 GN=SELENBP1	20	161	20
F1PSK6	EH domain containing 1 GN=EHD1	18	161	6
E2QXQ9	Tropomodulin 1 GN=TMOD1	15	160	15
F1PWQ0	Rab GDP dissociation inhibitor GN=GDI1	20	156	12
F2Z4P9	Ras-related protein Rab-10 GN=RAB10	6	156	4
A0A5F4CVA0	Ubiquitin specific peptidase 14 GN=USP14	19	142	19
A0A5F4DCE0	Tropomyosin 1 GN=TPM1	12	137	3
E2RRC6	Radixin GN=RDX	11	132	2
A0A5F4C5P0	ADAM metallopeptidase domain 10 GN=ADAM10	18	131	18
A0A5F4CZ37	Solute carrier family 16 member 7 GN=SLC16A7	7	128	7
J9P9V8	Tetraspanin GN=CD82	7	125	7
E2RDX2	Charged multivesicular body protein 4B GN=CHMP4B	6	124	6
E2R0K4	RAB14, member RAS oncogene family GN=RAB14	10	117	9
Q3BCQ5	Ammonium transporter Rh type A GN=RHAG	4	116	4
F1PE31	IGc1 domain-containing protein GN=DLA88	7	111	2
A0A5F4C8H6	Uncharacterized protein GN=FBN1	34	108	34
E2QSE3	Flotillin GN=FLOT1	18	102	18
Q3BCQ6	Rh antigen-like protein GN=Rh30	4	100	4
E2R081	Serpin family B member 10 GN=SERPINB10	13	95	13
F1PCV3	Angiotensin-converting enzyme GN=ACE	24	93	24
E2QW69	RAB5B, member RAS oncogene family GN=RAB5B	7	93	4
P63091	Guanine nucleotide-binding protein G(s) subunit alpha GN=GNAS	10	90	9
Q50KA9	Nucleoside diphosphate kinase A GN=NME1	6	89	4
F1P6Q0	G protein subunit alpha i3 GN=GNAI3	8	89	2
E2R002	Prostaglandin reductase 1 GN=PTGR1	12	86	12
J9NYJ8	RAB6A, member RAS oncogene family GN=RAB6A	4	86	2
E2RHG2	Thioredoxin domain-containing protein GN=PRDX1	5	84	3
A0A5F4BZ45	RAB35, member RAS oncogene family GN=RAB35	5	83	4
F1Q455	PKHD1 like 1 GN=PKHD1L1	29	79	28
F1PKR0	Uncharacterized protein GN=SDCBP	8	79	8
E2RC20	Nucleoside diphosphate kinase GN=NME2	6	77	4
J9PAQ4	Ras-related protein Rab-4B GN=RAB4B	3	77	2
P18066	Ras-related protein Rab-5A GN=RAB5A	5	76	2
F1PTI2	Uncharacterized protein GN=BTNL10	14	75	14
F6X7V8	Erythroblast membrane associated protein GN=ERMAP	13	74	13
F1PBK7	AAA domain-containing protein GN=PSMC3	12	74	12
F1PXZ9	KRAS proto-oncogene, GTPase GN=KRAS	8	73	8
F1P9P5	Ubiquitin carboxyl-terminal hydrolase GN=USP5	15	72	15
F1PKV2	Coactivator associated arginine methyltransferase 1 GN=CARM1	12	71	12
E2REF3	Urea transporter GN=SLC14A1	5	70	4
F1PI01	Kell metallo-endopeptidase GN=KEL	18	69	18
F1PQ40	Proteasome 26S subunit, ATPase 1 GN=PSMC1	11	69	10
A0A5F4C9D6	Dehydrogenase/reductase 13 GN=DHRS13	14	68	14
E2RCP9	26S proteasome non-ATPase regulatory subunit 2 GN=PSMD2	17	67	17
F1PRC5	Aamy domain-containing protein GN=SLC3A2	16	67	16
E2R1N1	YOD1 deubiquitinase GN=YOD1	8	67	8
F1Q1S9	Uncharacterized protein GN=TBC1D24	8	67	8
A0A5F4BNY8	Thrombospondin 3 GN=THBS3	13	66	11
F1P7S2	EH domain binding protein 1 like 1 GN=EHBP1L1	15	63	15
A0A5F4CWH9	Tripeptidyl peptidase 2 GN=TPP2	20	62	20
E2RJ26	Proteasome 26S subunit, non-ATPase 11 GN=PSMD11	16	61	16
A0A5F4D1L1	Solute carrier family 44 member 1 GN=SLC44A1	13	61	13
A0A5F4BQH7	Chromosome 9 C17orf99 homolog GN=C9H17orf99	6	61	6
E2QW49	Proliferation-associated 2G4 GN=PA2G4	12	60	12
F6V0D8	Chaperonin containing TCP1 subunit 2 GN=CCT2	16	59	16
E2R478	Neuronal pentraxin 1 GN=NPTX1	11	58	11
E2RM61	Proteasome 26S subunit, ATPase 5 GN=PSMC5	13	57	12
A0A5F4C8R9	Uncharacterized protein GN=PSMC6	12	55	12
Q5QQ50	Xylosyltransferase 2 GN=XYLT2	6	55	6
F1PCH3	Enolase 1 GN=ENO1	7	55	2
A0A5F4CRP0	Uncharacterized protein GN=CHMP5	4	53	4
A0A5F4CC82	ADP ribosylation factor 4 GN=ARF4	6	53	4
E2RJH1	Rac family small GTPase 2 GN=RAC2	5	52	2
E2RQ14	Annexin GN=ANXA5	11	51	11
J9NX28	RAS like proto-oncogene A GN=RALA	7	50	4
F1P624	Cullin associated and neddylation dissociated 1 GN=CAND1	16	49	16
F1P6D7	CD47 molecule GN=CD47	4	47	4
A0A5F4C5K8	Membrane palmitoylated protein 2 GN=MPP2	13	46	13
F1P996	G protein pathway suppressor 1 GN=GPS1	7	46	7
A0A5F4CKF4	Tetraspanin 2 GN=TSPAN2	2	46	2
P02727	Glycophorin-A GN=GYPA	2	45	2
J9P920	Ubiquitin like modifier activating enzyme 1 GN=UBA1	12	44	12
F1PEJ5	Tetraspanin GN=TSPAN33	4	44	4
F1PEZ2	Nucleoside diphosphate kinase GN=NME4	7	44	3
A0A5F4C1K4	2',3'-cyclic nucleotide 3' phosphodiesterase GN=CNP	13	43	13
Q6TEQ7	Annexin A2 GN=ANXA2	13	41	13
J9P6R1	Proteasome 26S subunit, non-ATPase 7 GN=PSMD7	10	41	10
F1PRW0	Proteasome 26S subunit, non-ATPase 4 GN=PSMD4	7	41	7
E2R7A0	Hydroxyacylglutathione hydrolase GN=HAGH	5	40	5
E2RLB2	RAS like proto-oncogene B GN=RALB	6	40	3
F1P797	5-aminoimidazole-4-carboxamide ribonucleotide formyltransferase/IMP cyclohydrolase GN=ATIC	17	39	17
A0A5F4DI79	Myosin IC GN=MYO1C	12	39	12
E2RH48	Proteasome 26S subunit, ATPase 4 GN=PSMC4	10	39	10
A0A5F4C3L7	Milk fat globule-EGF factor 8 protein GN=MFGE8	8	38	8
J9P3T9	RAN binding protein 1 GN=RANBP1	5	38	5
G1K265	Lysozyme GN=LYZ	4	38	4
E2QY46	Dicarbonyl and L-xylulose reductase GN=DCXR	10	37	10
E2R629	Atypical chemokine receptor 1 GN=ACKR1	2	37	2
A0A5F4D768	Chaperonin containing TCP1 subunit 5 GN=CCT5	10	36	10
F1P699	Phosphatidylethanolamine-binding protein 1 GN=PEBP1	6	36	6
E2RN00	Prickle planar cell polarity protein 2 GN=PRICKLE2	5	36	5
J9P2T7	Uncharacterized protein	10	36	2
E2R9D7	DnaJ heat shock protein family (Hsp40) member B1 GN=DNAJB1	7	35	7
J9P4X0	Nucleosome assembly protein 1 like 4 GN=NAP1L4	4	35	3
F6XH46	Glutathione peroxidase GN=GPX1	8	34	8
E2R913	Calcium regulated heat stable protein 1 GN=CARHSP1	5	34	5
J9NYC0	Microfibril associated protein 4 GN=MFAP4	2	34	2
F1PZL7	Transportin 1 GN=TNPO1	12	33	10
J9P9E9	Glucose-6-phosphate 1-dehydrogenase GN=G6PD	9	33	9
E2RC10	Synaptophysin like 1 GN=SYPL1	4	33	4
E2RCF9	Uncharacterized protein GN=PCBP2	6	33	3
E2QXD1	Annexin GN=ANXA7	12	32	12
P52784	ATP-dependent 6-phosphofructokinase, muscle type GN=PFKM	8	32	8
E2REA8	COP9 signalosome subunit 2 GN=COPS2	8	32	8
J9P884	Versican GN=VCAN	6	32	6
E2RAI8	Oxidative stress responsive kinase 1 GN=OXSR1	6	32	6
E2QUL2	Vesicle associated membrane protein 8 GN=VAMP8	5	32	5
F1PG85	Solute carrier family 44 member 2 GN=SLC44A2	4	32	4
A0A5F4C7L7	Tetraspanin 9 GN=TSPAN9	2	32	2
F1PQM7	Tetraspanin GN=CD9	2	32	2
J9P7P2	Uncharacterized protein GN=LOC610164	8	31	8
F1Q067	Septin 7 GN=SEPTIN7	6	31	5
E2QW85	Elongation factor 1-alpha	5	31	3
J9P3F4	Stum, mechanosensory transduction mediator homolog GN=STUM	2	30	2
F1PAG5	Vesicle amine transport 1 GN=VAT1	6	29	6
J9NWA8	Uncharacterized protein GN=FABP5	3	29	3
F6V040	AA_permease_C domain-containing protein	4	29	3
A0A5F4DAC6	Neuropilin 1 GN=NRP1	8	28	8
J9P4N4	CD59 molecule GN=CD59	3	28	3
F1Q3V2	ATP-citrate synthase GN=ACLY	14	27	14
J9NSQ6	Heparan sulfate proteoglycan 2 GN=HSPG2	13	27	13
E2RNG4	Desmoplakin GN=DSP	12	27	12
J9P9T3	Adenylate kinase isoenzyme 1 GN=AK1	7	27	7
A0A5F4CKD6	Uncharacterized protein GN=CSNK2A1	6	27	6
E2RKS4	Eukaryotic translation initiation factor 4B GN=EIF4B	5	27	5
E2RP98	Carboxylic ester hydrolase GN=ACHE	9	26	9
F1P6B7	Annexin GN=ANXA1	9	26	9
E2R8W7	Calcium binding protein 39 GN=CAB39	8	26	7
A0A5F4BSW0	Uncharacterized protein	5	26	5
J9NY67	Uncharacterized protein	5	26	5
E2RNV4	G protein-coupled receptor class C group 5 member D GN=GPRC5D	4	26	4
F1PHS2	Serpin family A member 11 GN=SERPINA11	6	25	6
E2RLL6	Chaperonin containing TCP1 subunit 6A GN=CCT6A	10	25	5
A0M8V0	F-actin-capping protein subunit alpha-2 GN=CAPZA2	5	25	3
E2QZQ6	Copine 3 GN=CPNE3	12	24	11
J9NXJ4	Hexose-6-phosphate dehydrogenase/glucose 1-dehydrogenase GN=H6PD	11	24	11
F1PQD3	Tubulin tyrosine ligase like 12 GN=TTLL12	10	24	10
E2RB79	T-complex protein 1 subunit gamma GN=CCT3	9	24	9
A0A5F4BQI1	Actin related protein 2/3 complex subunit 4 GN=ARPC4	6	24	6
A0A5F4BQS4	Drebrin like GN=DBNL	3	24	2
F1PPJ1	Phosphatidylinositol-5-phosphate 4-kinase type 2 alpha GN=PIP4K2A	8	23	8
E2RB90	Heterogeneous nuclear ribonucleoprotein F GN=HNRNPF	7	23	7
A0A5F4BP62	Argonaute RISC catalytic component 2 GN=AGO2	7	23	7
G1K288	Ras-related protein Rab-2A GN=RAB2A	5	23	5
J9P4L3	Arachidonate 15-lipoxygenase GN=ALOX15	11	22	11
F1PEN8	Carboxylic ester hydrolase GN=BCHE	9	22	9
A0A5F4CT48	Integrin subunit alpha M GN=ITGAM	11	21	10
A0A140T8E6	Uncharacterized protein GN=JUP	9	21	9
A0A5F4CW08	Dynamin 2 GN=DNM2	8	21	8
E2QYG6	ATPase H+ transporting V1 subunit A GN=ATP6V1A	7	21	7
E2RPE3	IST1 factor associated with ESCRT-III GN=IST1	6	21	6
F1PQV4	Olfactomedin like 3 GN=OLFML3	5	21	5
A0A5F4C0Q1	Syntaxin 7 GN=STX7	4	21	4
J9NZ45	RAP2B, member of RAS oncogene family GN=RAP2B	3	21	3
A0A5F4CW16	Coronin 1B GN=CORO1B	8	20	8
H9GW87	Transaldolase GN=LOC475937	5	20	5
E2QWP1	BRO1 domain and CAAX motif containing GN=BROX	4	20	4
A0A5F4BVL4	Uncharacterized protein GN=VPS4A	5	20	2
A0A5F4CJG8	Protein kinase C and casein kinase substrate in neurons 2 GN=PACSIN2	6	19	6
E2R9N5	RNA binding motif protein 12 GN=RBM12	9	18	8
F1PRW7	Transportin 2 GN=TNPO2	9	18	7
F1P9H3	Ectonucleotide pyrophosphatase/phosphodiesterase 4 GN=ENPP4	7	18	7
E2RF06	Importin 5 GN=IPO5	7	18	7
A0A5F4BXP7	Glycogen phosphorylase B GN=PYGB	7	18	5
A0A5F4CDV8	ATPase phospholipid transporting 8A1 GN=ATP8A1	3	18	3
E2QXP3	Arginyl aminopeptidase GN=RNPEP	9	17	9
E2QUU1	Eukaryotic translation initiation factor 3 subunit J GN=EIF3J	7	17	7
E2RGP6	Tumor susceptibility 101 GN=TSG101	7	17	7
F1Q435	Transglutaminase 2 GN=TGM2	5	17	5
A0A5F4DA40	Uncharacterized protein GN=EIF5A	2	17	2
A0A5F4C1F0	STEAP3 metalloreductase GN=STEAP3	9	16	9
F1PNY6	Transient receptor potential cation channel subfamily C member 6 GN=TRPC6	7	16	7
A0A5F4BZC7	Twinfilin actin binding protein 2 GN=TWF2	6	16	6
F6XRY2	Eukaryotic translation elongation factor 2 GN=EEF2	6	16	6
A0A5F4BQT8	Integrin subunit alpha V GN=ITGAV	6	16	6
E2RGK2	Adenylosuccinate lyase GN=TNRC6B	6	16	6
A0A5F4CT58	Thioredoxin reductase 2 GN=TXNRD2	4	16	4
E2RAL0	Rho GDP dissociation inhibitor beta GN=ARHGDIB	3	16	3
E2QUY7	Proteasome 26S subunit, non-ATPase 3 GN=PSMD3	3	16	3
E2QTD8	Myo-inositol oxygenase GN=MIOX	3	16	3
F1P933	Angiopoietin-1 GN=ANGPT1	9	15	9
E2RTD6	Hydroxymethylbilane synthase GN=HMBS	6	15	6
J9P8J3	Heterogeneous nuclear ribonucleoprotein K GN=HNRNPK	4	15	4
A0A5F4CYJ6	Aldehyde dehydrogenase 16 family member A1 GN=ALDH16A1	4	15	4
F1PLM7	Transmembrane protein 106B GN=TMEM106B	4	15	4
H9KUV5	Pyruvate kinase GN=PKLR	5	15	4
J9P5F0	Rho GTPase activating protein 45 GN=ARHGAP45	3	15	3
A0A5F4DFG9	Phosphoribosyl pyrophosphate synthetase 1 GN=PRPS1	4	15	2
F1Q2F6	Fatty acid synthase GN=FASN	11	14	11
F1P6Z3	N-ethylmaleimide sensitive factor, vesicle fusing ATPase GN=NSF	7	14	7
E2RT32	Syntaxin 12 GN=STX12	6	14	6
A0A5F4BY19	RELT like 1 GN=RELL1	6	14	6
A0A5F4CVK3	Uncharacterized protein	5	14	5
F1PFK0	Twinfilin actin binding protein 1 GN=TWF1	5	14	5
E2QY31	Platelet-activating factor acetylhydrolase IB subunit alpha GN=PAFAH1B1	4	14	4
A0A5F4BQK3	Lysosomal associated membrane protein 2 GN=LAMP2	4	14	4
A0A5F4CST2	Tetraspanin 14 GN=TSPAN14	4	14	4
A0A5F4BP23	Proteasome 26S subunit, non-ATPase 12 GN=PSMD12	4	14	4
E2RIU2	Charged multivesicular body protein 2A GN=CHMP2A	4	14	4
A0A5F4DKA2	Hemoglobin subunit mu GN=HBM	3	14	3
E2RD70	COP9 signalosome subunit 3 GN=COPS3	3	14	3
F6Y6B4	SH3 domain binding glutamate rich protein like 2 GN=SH3BGRL2	3	14	3
E2R020	Ras homolog family member G GN=RHOG	3	14	2
E2RQ34	Megakaryocyte and platelet inhibitory receptor G6b GN=MPIG6B	2	14	2
A0A5F4CGR8	Polycomb group ring finger 3 GN=PCGF3	2	14	2
F1PX57	26S proteasome non-ATPase regulatory subunit 1 GN=PSMD1	7	13	7
A0A5F4BYH6	Syntaxin 2 GN=STX2	6	13	6
E2RE13	ADP ribosylation factor like GTPase 8B GN=ARL8B	5	13	5
P55745	Ras-related protein Rab-21 GN=RAB21	5	13	5
E2QV12	Phosphoglucomutase 2 GN=PGM2	5	13	5
E2QT37	Nucleoporin 50 GN=NUP50	5	13	5
A0A5F4CWT6	Arrestin beta 1 GN=ARRB1	4	13	4
A0A5F4D669	Charged multivesicular body protein 6 GN=CHMP6	3	13	3
A0A5F4CLB4	Abraxas 2, BRISC complex subunit GN=ABRAXAS2	3	13	3
F1PS24	Collagen type II alpha 1 chain GN=COL2A1	2	13	2
A0A5F4DAV6	ATP binding cassette subfamily C member 4 GN=ABCC4	8	12	8
E2QYG1	Periostin GN=POSTN	6	12	6
E2QUL3	Acyl-CoA synthetase long chain family member 1 GN=ACSL1	6	12	6
A0A5F4D6P2	Vesicle associated membrane protein 7 GN=VAMP7	5	12	5
J9NWC3	MYC target 1 GN=MYCT1	4	12	4
F1PDJ7	Ig-like domain-containing protein GN=AZGP1	4	12	4
F1PBM2	Vesicle trafficking 1 GN=VTA1	3	12	3
E2RAC6	Vacuolar proton pump subunit B GN=ATP6V1B2	3	12	3
E2RMK6	Eukaryotic translation initiation factor 2 subunit gamma GN=EIF2S3	3	12	3
A0A5F4DCI7	Uncharacterized protein	2	12	2
F1Q2X9	Solute carrier family 11 member 2 GN=SLC11A2	2	12	2
E2QXD6	Glyoxalase domain containing 4 GN=GLOD4	2	12	2
H9GWC7	Fructosamine 3 kinase related protein GN=FN3KRP	6	11	6
F1Q4A4	Coagulation factor X GN=F10	5	11	5
E2RRA1	Protein kinase cAMP-dependent type II regulatory subunit beta GN=PRKAR2B	5	11	5
J9P5X6	Exportin 7 GN=XPO7	5	11	5
E2REI7	Nuclear receptor binding protein 1 (Fragment) GN=NRBP1	5	11	5
E2QYZ2	5'-nucleotidase GN=NT5C3A	5	11	5
F1PDQ4	Cytoplasmic FMR1-interacting protein GN=CYFIP1	7	11	3
E2RM35	Pyrroline-5-carboxylate reductase GN=PYCR3	3	11	3
E2RBL2	Secretory carrier-associated membrane protein GN=SCAMP2	3	11	3
E2QX78	Solute carrier family 43 member 3 GN=SLC43A3	3	11	3
J9P972	DAZ associated protein 1 GN=DAZAP1	3	11	3
A0A5F4CM86	Tetratricopeptide repeat domain 38 GN=TTC38	3	11	3
F6V440	Serglycin (Fragment) GN=SRGN	2	11	2
E2RGI4	Chloride intracellular channel protein GN=CLIC4	2	11	2
E2RSX8	Latexin GN=LXN	2	11	2
A0A5F4BTH2	Neutrophil cytosolic factor 2 GN=NCF2	5	10	5
Q8MJD1	Neutrophil elastase GN=ELANE	4	10	4
E2R0A0	Peroxiredoxin like 2A GN=PRXL2A	4	10	4
F1PZW8	G protein subunit alpha 13 GN=GNA13	4	10	4
F1PWT3	Deoxyribonuclease GN=DNASE1L1	4	10	4
A0A5F4CGL6	G protein-coupled receptor kinase 6 GN=GRK6	4	10	4
J9P6K0	RAP2A, member of RAS oncogene family GN=RAP2A	5	10	3
F1PQS8	CKLF like MARVEL transmembrane domain containing 6 GN=CMTM6	3	10	3
J9NRZ2	RAB18, member RAS oncogene family GN=RAB18	3	10	3
E2RNV3	PITH domain containing 1 GN=PITHD1	3	10	3
A0A5F4CCT6	Phosphoribosyl pyrophosphate synthetase 2 GN=PRPS2	4	10	2
J9P121	MINDY lysine 48 deubiquitinase 1 GN=MINDY1	2	10	2
F6XEV4	Uncharacterized protein	2	10	2
A0A5F4CFZ9	Cathelicidin antimicrobial peptide GN=CAMP	2	10	2
F1PUB3	Heart development protein with EGF like domains 1 GN=HEG1	5	9	5
E2RDX0	Uncharacterized protein	5	9	5
A0A5F4CLV9	SEC31 homolog A, COPII coat complex component GN=SEC31A	5	9	5
A0A5F4CL79	Biotinidase GN=BTD	4	9	4
E2R0L9	T-complex 1 GN=TCP1	4	9	4
F1PHZ3	Phosphatidylinositol transfer protein beta GN=PITPNB	4	9	4
F1P9K6	Junctional adhesion molecule 3 GN=JAM3	3	9	3
J9P0G7	Aamy domain-containing protein GN=LOC607314	3	9	3
J9NYK7	Uncharacterized protein GN=MYADM	3	9	3
A0A5F4D8G2	NSF attachment protein alpha GN=NAPA	3	9	3
A0A5F4CSG1	Adenosine kinase GN=ADK	3	9	3
F1PD37	Serine/threonine-protein phosphatase 2A activator GN=PTPA	3	9	3
E2RBW1	GMP reductase GN=GMPR2	4	9	2
E2R9D5	Uncharacterized protein	2	9	2
A0A5F4CQ32	Integrin subunit alpha M GN=ITGAM	3	9	2
E2RQ37	Lymphocyte antigen 6 family member G6C GN=LY6G6C	2	9	2
A0A5F4CX45	Thyroglobulin GN=TG	8	8	8
F1PH57	NCK associated protein 1 GN=NCKAP1	7	8	7
E2R0W5	Uncharacterized protein GN=CR2	6	8	6
A0A5F4CYE2	Protein tyrosine phosphatase receptor type F GN=PTPRF	5	8	5
F1PKS1	ATP-dependent 6-phosphofructokinase GN=PFKP	5	8	5
A0A5F4DDF5	Mannose-6-phosphate receptor, cation dependent GN=M6PR	4	8	4
A0A5F4BSS2	Stress-70 protein, mitochondrial GN=HSPA9	4	8	4
F1PK43	Nuclear autoantigenic sperm protein GN=NASP	4	8	4
F1PJE7	ATPase copper transporting beta GN=ATP7B	4	8	4
A0A5F4DL21	Uncharacterized protein GN=NCSTN	4	8	4
F1PW12	Coproporphyrinogen oxidase GN=CPOX	3	8	3
J9JHE0	Protein kinase cGMP-dependent 1 GN=PRKG1	3	8	3
A0A5F4D804	Voltage dependent anion channel 2 GN=VDAC2	3	8	3
E2R9R6	Programmed cell death 10 GN=PDCD10	3	8	3
F1PDM3	SEC13 homolog, nuclear pore and COPII coat complex component GN=SEC13	3	8	3
J9P8S3	Protein S100 GN=S100A8	2	8	2
E2RFJ3	Solute carrier family 40 protein GN=SLC40A1	2	8	2
J9NZQ3	V-type proton ATPase subunit G	2	8	2
J9P922	Cytochrome b reductase 1 GN=CYBRD1	2	8	2
F1Q0S2	Sodium/potassium-transporting ATPase subunit beta GN=ATP1B3	2	8	2
F1PD06	NAD(P)(+)--arginine ADP-ribosyltransferase GN=ART4	2	8	2
F1PCR0	Microsomal glutathione S-transferase 3 GN=MGST3	2	8	2
E2R7P9	P2X purinoceptor GN=P2RX1	2	8	2
H9GW57	Uncharacterized protein GN=LOC475497	2	8	2
F1PG13	Ubiquitin conjugating enzyme E2 O GN=UBE2O	5	7	5
F1PQ45	Integrin subunit alpha 11 GN=ITGA11	5	7	5
F1PQ29	Integrin subunit alpha 4 GN=ITGA4	4	7	4
E2R9U8	Eukaryotic translation elongation factor 1 delta GN=EEF1D	3	7	3
F1PI87	Obg-like ATPase 1 GN=OLA1	3	7	3
E2R2A1	Golgin A7 GN=GOLGA7	3	7	3
F1P9A7	Protein tweety homolog GN=TTYH3	3	7	3
A0A5F4CGS2	Uncharacterized protein GN=GSTP1	3	7	3
E2RQ54	Ig-like domain-containing protein GN=LY6G6F	3	7	3
E2QSB5	Ephrin B1 GN=EFNB1	3	7	3
E2R5G6	RAS related GN=RRAS	3	7	3
A0A5F4CEG3	Insulin like growth factor binding protein 6 GN=IGFBP6	2	7	2
E2RKW8	Desmoglein-1 GN=DSG1	2	7	2
J9NRK8	Fructosamine 3 kinase GN=FN3K	2	7	2
A0A5F4DD49	Serine incorporator 3 GN=SERINC3	2	7	2
E2RFK4	CD177 molecule GN=CD177	2	7	2
E2R833	Leucine rich alpha-2-glycoprotein 1 GN=LRG1	5	6	5
Q6UKZ8	Growth/differentiation factor 8 GN=MSTN	5	6	5
F1PP08	Dipeptidyl peptidase 4 GN=DPP4	4	6	4
E2R691	Peptidyl arginine deiminase 3 GN=PADI3	4	6	4
E2R7S1	Calcium-transporting ATPase GN=ATP2B1	4	6	4
F1PKF1	Cell cycle control protein GN=TMEM30A	4	6	4
A0A5F4D103	Fc fragment of IgE receptor II GN=FCER2	3	6	3
A0A5F4DIK6	DnaJ heat shock protein family (Hsp40) member B2 GN=DNAJB2	3	6	3
E2RPY6	Cytoplasmic protein GN=NCK2	3	6	3
A0A5F4BUH8	Uncharacterized protein GN=USP9X	3	6	3
F1PKU7	Protein kinase C GN=PRKCB	3	6	2
E2QXY0	Phosphoprotein membrane anchor with glycosphingolipid microdomains 1 GN=PAG1	2	6	2
J9P6K8	tRNA(His) guanylyltransferase GN=THG1L	2	6	2
F1Q089	Xg glycoprotein GN=XG	2	6	2
E2RHL4	ADP ribosylation factor 6 GN=ARF6	2	6	2
F1Q331	T-complex protein 1 subunit delta GN=CCT4	4	5	4
A0A5F4BTP4	Adaptor related protein complex 1 subunit beta 1 GN=AP1B1	4	5	4
A0A5F4CNH1	Thromboxane A synthase 1 GN=TBXAS1	3	5	3
A0A5F4D3P9	Uncharacterized protein GN=HNRNPC	3	5	3
F1PPI5	Amino acid transporter GN=SLC1A5	3	5	3
J9P8N1	STAM binding protein GN=STAMBP	3	5	3
E2RQI7	NGG1 interacting factor 3 like 1 GN=NIF3L1	3	5	3
E2QRU7	Cullin 2 GN=CUL2	3	5	3
F1P9A3	Ferrochelatase GN=FECH	2	5	2
A0A5F4CCI6	Serine/threonine kinase 24 GN=STK24	2	5	2
A0A5F4CB33	ANTXR cell adhesion molecule 2 GN=ANTXR2	2	5	2
F1PAY4	TNF alpha induced protein 8 GN=TNFAIP8	2	5	2
A0A5F4CF70	Solute carrier family 38 member 10 GN=SLC38A10	2	5	2
A0A5F4CI04	Uncharacterized protein GN=SCAMP3	2	5	2
A0A5F4CWM0	Diaphanous related formin 1 GN=DIAPH1	2	5	2
J9PAW2	Importin subunit alpha GN=KPNA4	3	5	2
E2RNX6	Notchless homolog 1 GN=NLE1	2	5	2
E2RAM4	Fc fragment of IgE receptor Ig GN=FCER1G	2	5	2
A0A5F4D5P6	Erbb2 interacting protein GN=ERBIN	2	5	2
J9P7C6	Podocalyxin GN=PODXL	2	5	2
E2RK13	Protein XRP2 GN=RP2	2	5	2
F1PBG0	Protein kinase AMP-activated non-catalytic subunit gamma 1 GN=PRKAG1	2	5	2
A0A5F4BQ87	WW domain binding protein 2 GN=WBP2	2	5	2
E2RQC0	C-type lectin domain family 3 member A GN=CLEC3A	4	4	4
E2REK5	Transportin 3 GN=TNPO3	4	4	4
A0A5F4CCP6	ANTXR cell adhesion molecule 1 GN=ANTXR1	3	4	3
A0A5F4D881	Sushi domain containing 1 GN=SUSD1	3	4	3
A0A5F4CIR1	Nidogen 1 GN=NID1	3	4	3
A0A5F4BY69	Collagen type XII alpha 1 chain GN=COL12A1	3	4	3
A0A5F4D0A6	Aspartyl-tRNA synthetase GN=DARS1	3	4	3
F1Q3C4	Uncharacterized protein GN=LOC479912	2	4	2
F1PVR0	Matrix metallopeptidase 8 GN=MMP8	2	4	2
J9NXC6	Eukaryotic translation elongation factor 1 beta 2 GN=EEF1B2	2	4	2
A0A0B4J195	Aspartate aminotransferase GN=GOT1	2	4	2
E2RKJ6	Serpin family B member 1 GN=SERPINB1	2	4	2
A0A5F4D4V2	Sidekick cell adhesion molecule 1 GN=SDK1	2	4	2
A0A5F4CKV5	Solute carrier family 12 member 7 GN=SLC12A7	2	4	2
A0A5F4BZF0	Ubiquinol-cytochrome c reductase core protein 2 GN=UQCRC2	2	4	2
F1PAZ6	Enoyl-CoA hydratase, short chain 1 GN=ECHS1	2	4	2
A0A5F4D7F7	ABRA C-terminal like GN=ABRACL	2	4	2
F1Q136	Vesicle associated membrane protein 5 GN=VAMP5	2	4	2
E2RQC9	RuvB-like helicase GN=RUVBL1	2	4	2
F1PUY6	Meprin A subunit GN=MEP1A	2	4	2
Q8MKI5	Caspase-3 GN=CASP3	2	4	2
F1PWR1	Insulin like growth factor 2 receptor GN=IGF2R	2	4	2
F1PFB7	WAS/WASL interacting protein family member 1 GN=WIPF1	2	4	2
A0A5F4BT67	Alpha-centractin GN=ACTR1A	2	4	2
A0A5K1UDZ7	Solute carrier family 12 member 4 GN=SLC12A4	3	3	3
J9P740	Thioredoxin like 1 GN=TXNL1	3	3	3
F1Q1H3	Programmed cell death 6 GN=PDCD6	2	3	2
Q2A652	G-protein coupled receptor GN=PTGDR2	2	3	2
Q4LAL9	Cathepsin D GN=CTSD	2	3	2
J9P820	Formin homology 2 domain containing 1 GN=FHOD1	2	3	2
J9P4C5	BCL2 associated athanogene 2 GN=BAG2	2	3	2
A0A5F4CWY2	Quinoid dihydropteridine reductase GN=QDPR	2	3	2
J9P6Y7	Solute carrier family 30 member 1 GN=SLC30A1	2	3	2
A0A5F4C5J5	Glycoprotein VI platelet GN=GP6	2	3	2
J9NTA1	Methyltransferase like 7A GN=METTL7A	2	3	2
E2R5Z5	Transmembrane 9 superfamily member GN=TM9SF2	2	3	2
J9P1D1	Glia maturation factor GN=GMFG	2	3	2
A0A5F4C357	Phospholipid scramblase 4 GN=PLSCR4	2	3	2
F1PQ92	STE20 related adaptor beta GN=STRADB	2	3	2
F1Q0B6	Src kinase associated phosphoprotein 2 GN=SKAP2	2	3	2
F1PGJ5	Scavenger receptor class B member 2 GN=SCARB2	2	3	2
F1PB96	ICAM_N domain-containing protein GN=ICAM4	2	3	2
E2R0R1	Proteasome 26S subunit, non-ATPase 9 GN=PSMD9	2	3	2
A0A5F4DJ40	Prohibitin 2 GN=PHB2	2	3	2
E2RNY7	ATP synthase F1 subunit gamma GN=ATP5F1C	2	3	2
F1PMH6	Mannose receptor C-type 1 GN=MRC1	2	3	2
F1PM26	CD109 molecule GN=CD109	2	3	2
A0A5F4C3I4	ABI family member 3 binding protein GN=ABI3BP	2	3	2
A0A5F4D8P8	Isocitrate dehydrogenase (NADP(+)) 2, mitochondrial GN=IDH2	2	3	2
A0A5F4D858	Protein kinase cAMP-activated catalytic subunit beta GN=PRKACB	2	3	2
A0A5F4D269	Synaptotagmin like 4 GN=SYTL4	2	3	2
E2R3J3	G protein subunit alpha z GN=GNAZ	2	3	2
F1PE67	AP-2 complex subunit alpha GN=AP2A1	2	3	2
A0A5F4C7B8	Two pore segment channel 2 GN=TPCN2	2	3	2
F6Y591	UBX domain protein 6 GN=UBXN6	2	3	2
E2RQS7	Peptidylprolyl isomerase GN=FKBP3	2	3	2
E2RNT3	DExH-box helicase 9 GN=DHX9	2	3	2
P30804	Adenylate cyclase type 6 GN=ADCY6	2	3	2
A0A5F4CGF8	Abl interactor 2 GN=ABI2	2	2	2
Q6UR05	Multidrug resistance-associated protein 1 GN=ABCC1	2	2	2
A0A5F4CV51	RAB23, member RAS oncogene family GN=RAB23	2	2	2
A0A5F4CXH2	Bactericidal permeability increasing protein GN=BPI	2	2	2
A0A5F4CIT2	Plexin domain containing 2 GN=PLXDC2	2	2	2
A0A5F4CD04	Abl interactor 1 GN=ABI1	2	2	2
A0A5F4BRN0	Hepatocyte growth factor-regulated tyrosine kinase substrate GN=HGS	2	2	2
E2RL17	Eukaryotic translation initiation factor 2 subunit alpha GN=EIF2S1	2	2	2
A0A5F4DGX0	Uncharacterized protein	2	2	2
P42929	Heat shock protein beta-1 GN=HSPB1	2	2	2
E2RR68	Niban apoptosis regulator 2 GN=NIBAN2	2	2	2
F6XIK8	Synaptotagmin binding cytoplasmic RNA interacting protein GN=SYNCRIP	2	2	2
F1PPB6	Serine/threonine kinase receptor associated protein GN=STRAP	2	2	2
E2QWG2	F2R like thrombin or trypsin receptor 3 GN=F2RL3	2	2	2
E2RB45	PI3K/PI4K domain-containing protein GN=PGAM1	2	2	2
E2R3P7	Ring finger protein 123 GN=RNF123	2	2	2
A0A5F4DHC3	CD37 molecule GN=CD37	2	2	2
A0A5F4CDM2	Damage specific DNA binding protein 1 GN=DDB1	2	2	2
E2RN45	G3BP stress granule assembly factor 1 GN=G3BP1	2	2	2
A0A5F4DD71	Adhesion regulating molecule 1 GN=ADRM1	2	2	2
A0A5F4D4K2	Late endosomal/lysosomal adaptor, MAPK and MTOR activator 1 GN=LAMTOR1	2	2	2
E2RPP4	CDC42 binding protein kinase beta GN=CDC42BPB	2	2	2
E2R1R4	Uncharacterized protein GN=ATP6V1E1	2	2	2
A0A5F4CK47	Presenilin 2 GN=PSEN2	2	2	2
E2RRD4	Thioredoxin domain-containing protein GN=PRDX3	2	2	2
F1PVC0	Glycogenin 1 GN=GYG1	2	2	2
J9NSQ4	Regulator of G protein signaling 10 GN=RGS10	2	2	2
E2RFY1	Transmembrane channel-like protein GN=TMC8	2	2	2
