# Supplementary material for: Characterization and Proteomic Analysis of Plasma EVs Recovered from Healthy and Diseased Dogs with Canine Leishmaniosis
Source: Int J Mol Sci. 2023 Mar 13;24(6):5490. doi: 10.3390/ijms24065490 (PMC10056832; doi:10.3390/ijms24065490)
Supplement: Supplementary file 1 [file ijms-24-05490-s001.zip › ijms-2208855-supplementary/Table S3.xlsx]

## Sheet: Healthy
Gene Ontology	Genes	p value
Biological Processes
GO:0033700 phospholipid efflux	APOC2, APOA2, APOA4, APOE	0.00304916
GO:0033344 cholesterol efflux	APOC2, APOA2, APOA4, APOE	0.00709721
GO:0034384 high-density lipoprotein particle clearance	APOC2, APOA2, APOE	0.024793
GO:0070328 triglyceride homeostasis	APOC2, APOA4, APOE	0.024793
GO:0043691 reverse cholesterol transport	APOA2, APOA4, APOE	0.024793
GO:0034380 high-density lipoprotein particle assembly	APOA2, APOA4, APOE	0.024793
Molecular function
GO:0003924 GTPase activity	RAB2A, RAB1A, RAB5C, RAB27A, RHOA, GNAI2, CDC42, GNAQ, GNB1, GNAS, KRAS, RAC1, RAB5A, RAN, RAB8A, ARF6	4.84713e-07
GO:0005525 GTP binding	RAB2A, RAB1A, RAB5C, RAB4B, RAB27A, RHOA, GNAI2, RAB10, CDC42, GNAQ, GNAS, KRAS, RAC1, RAB5A, RAN, RAB8A, RAB7A, ARF6	2.51116e-06
GO:0019003 GDP binding	RAB10, RAB2A, RAB5C, RAB27A, RAB5A, RAB8A, ARF6	0.000363367
GO:0005524 ATP binding	HSPA9, ABCC4, ABCC1, HSP90AB1, PKLR, SRC, HSPA4, AK1, NME2, PEBP1, ATP1A1, ADCY6, HSPD1, NME1, HSP90B1, ACTR1A, ATP5F1A, ATP7B, ATP5F1B, MYH9, PFKM, GLUL, GALK1	0.000729102
GO:0004175 endopeptidase activity	PSMB7, F9, CASP3, PSMB8, PSMB9	0.00392005
GO:0042803 protein homodimerization activity	TPI1, MSTN, IDH1, CAT, APOA2, TLR9, APOA1, MYH9, HSPB1, SLC4A1, APOE	0.015309
GO:0004550 nucleoside diphosphate kinase activity	AK1, NME2, NME1	0.0248046
GO:0004298 threonine-type endopeptidase activity	PSMB7, PSMB8, PSMB9	0.0248046
GO:0060228 phosphatidylcholine-sterol O-acyltransferase activator activity	APOA2, APOA4, APOE	0.0248046
GO:0005178 integrin binding	VCAM1, VWF, ITGB3, MYH9, THY1	0.0275167
GO:0000287 magnesium ion binding	PKLR, IDH1, IDH2, XYLT2, RAN	0.0275167
GO:0051082 unfolded protein binding	HSP90AB1, CANX, CLU, HSP90B1	0.0449964
GO:0005201 extracellular matrix structural constituent	COL1A1, LOC609026, COL2A1, COL1A2, FBN1	0.0452951
GO:0046872 metal ion binding	CRP, LOC609402, ITGB2, NME2, ADAM10, HBB, AFP, ATP1A1, ADCY6, NME1, GNAI2, COL1A1, SELP, COL2A1, COL1A2, GNAQ, CAT, ALB, GNAS, TIMP1, PFKM, GLUL	0.0460525
Cellular compartment
GO:0042470 melanosome	RAB2A, RAB1A, RAB5C, TFRC, CANX, RAB27A, RAC1, ATP1A1, CTSD, RAB5A, RAN, HSP90B1	7.7584e-09
GO:0070382 exocytic vesicle	RAB1A, RAB5C, ANXA2, RAB27A, MYH9, RAB5A, RAB8A, ARF6, RAB7A, GNAI2	1.47034e-05
GO:0034361 very-low-density lipoprotein particle	APOH, APOC2, APOC1, APOA2, APOC3, APOE	3.32558e-05
GO:0001726 ruffle	SLC9A3R1, PODXL, MYADM, NME2, MYH9, RAB5A, ARF6	8.14675e-05
GO:0042627 chylomicron	APOH, APOC2, APOA2, APOC3, APOA4, APOE	0.000107806
GO:0034364 high-density lipoprotein particle	APOH, APOC1, APOA1, APOA4, APOE, PLA2G7	0.000266307
GO:0005829 cytosol	RAB1A, TPI1, NCF2, IDH1, STXBP2, AK1, CLU, RHOA, GNAI2, PSMB9, CD109, MYH9, CALR, RAC1, GAPDH, RAB5A, GLUL, RAN, RAB7A, GALK1, ARF6	0.00301707
GO:0030670 phagocytic vesicle membrane	RAB10, DLA88, RAB5A, RAB8A, RAB7A	0.00349614
GO:0005938 cell cortex	ACTR1A, EPB41, MYH9, RAC1, RHOA, ARF6	0.00839587
GO:0005768 endosome	RAB10, RAB4B, RAB5C, ANXA2, ITGB3, TLR9, RAB5A, RAB8A	0.00855416
GO:0043197 dendritic spine	CDC42, RAC1, RHOA, RAB8A	0.0121417
GO:0016323 basolateral plasma membrane	ABCC4, EPB41, SLC4A1, ATP1A1, CD44, AQP1	0.0191265
GO:0030496 midbody	CDC42, RHOA, RAB8A, GNAI2	0.0198371
GO:0012505 endomembrane system	SLC9A3R1, RAB1A, RAB5C, RAB5A	0.0198371
GO:0034362 low-density lipoprotein particle	APOC2, APOE, PLA2G7	0.0233537
GO:0005839 proteasome core complex	PSMB7, PSMB8, PSMB9	0.0233537
GO:0008305 integrin complex	ITGB3, ITGA2B, ITGB2	0.0233537
GO:0034366 spherical high-density lipoprotein particle	APOC2, APOA2, CLU	0.0233537
GO:0005737 cytoplasm	GDI1, AK1, GDI2, HSPB1, PEBP1, HSPD1, GNAI2, AQP1, CDC42, PSMB7, ACTR1A, PODXL, FTH1, CASP3, GLUL, VASP, TGFB1, ANXA2, PKLR, HSPA4, NME2, PSMB8, NME1, PSMB9, COL1A1, COL2A1, GNB1, CAT, MYH9, PFKM, GAPDH, RAN, GALK1, FTL	0.0249453
GO:0005834 heterotrimeric G-protein complex	GNAQ, GNB1, GNAS, GNAI2	0.0296417
GO:0030139 endocytic vesicle	RAB5C, RAB5A, IGF2R, ARF6	0.041538
GO:0031012 extracellular matrix	COL1A1, LOC609026, COL6A3, APOE, TIMP1, MMP9	0.0436593

## Sheet: CanL
Gene Ontology	Genes	p value
Biological Processes
GO:0007596 blood coagulation	FGB, FGA, F8, F9, VWF, F11, RAB27A, GP1BA, PLG, SLC4A1	6.67e-07
GO:0007155 cell adhesion	SELP, VCAM1, VWF, COL7A1, ITGA2B, FN1, MYH9, COL6A3, GP1BA, THY1, CD44	0.000215
GO:0042157 lipoprotein metabolic process	APOC1, APOA2, APOA1, APOC3, APOA4	0.000277
GO:0033700 phospholipid efflux	APOC2, APOA2, APOA4, APOE	0.00117836
GO:0033344 cholesterol efflux	APOC2, APOA2, APOA4, APOE	0.00279954
GO:0006641 triglyceride metabolic process	APOH, APOC1, CAT, APOE	0.00279954
GO:0007229 integrin-mediated signaling pathway	ADAMTS13, ITGB3, ITGA2B, ITGB2, ADAM10	0.00313181
GO:0050821 protein stabilization	APOA2, APOA1, CALR, GAPDH, CLU	0.00466513
GO:0006457 protein folding	HSP90AB1, HSPA4, CANX, HSP90B1	0.00885312
GO:0070328 triglyceride homeostasis	APOC2, APOA4, APOE	0.0132489
GO:0034384 high-density lipoprotein particle clearance	APOC2, APOA2, APOE	0.0132489
GO:0051006 positive regulation of lipoprotein lipase activity	APOH, APOC2, APOA4	0.0132489
GO:0034380 high-density lipoprotein particle assembly	APOA2, APOA4, APOE	0.0132489
GO:0010499 proteasomal ubiquitin-independent protein catabolic process	PSMB7, PSMB8, PSMB9	0.0132489
GO:0043691 reverse cholesterol transport	APOA2, APOA4, APOE	0.0132489
GO:0051603 proteolysis involved in cellular protein catabolic process	PSMB7, PSMB8, CTSS, PSMB9	0.0134677
GO:0006869 lipid transport	APOC2, APOC1, APOA1, APOC3	0.0192103
GO:0008360 regulation of cell shape	SLC9A3R1, FN1, MYH9, RAC1, RHOA	0.0197254
GO:0045198 establishment of epithelial cell apical/basal polarity	CDC42, SLC9A3R1, RHOA	0.0253194
GO:0043161 proteasome-mediated ubiquitin-dependent protein catabolic process	PSMB7, PSMB8, PSMB9	0.0253194
Molecular function
GO:0003924 GTPase activity	CDC42, GNAQ, GNB1, RAB27A, RAC1, RAB11A, RHOA, RAN, GNAI2	0.00309867
GO:0016887 ATPase activity	ATP2A2, MYH9, ATP1A1, HSP90B1	0.00874029
GO:0005178 integrin binding	VCAM1, VWF, ITGB3, MYH9, THY1	0.00894935
GO:0046872 metal ion binding	CRP, LOC607460, MYOC, ITGB2, ATP2A2, ADAM10, HBB, AFP, ATP1A1, GNAI2, PTGS1, COL1A1, SELP, COL1A2, GNAQ, CAT, ALB, TIMP1, GLUL	0.0129817
GO:0004298 threonine-type endopeptidase activity	PSMB7, PSMB8, PSMB9	0.0131216
GO:0060228 phosphatidylcholine-sterol O-acyltransferase activator activity	APOA2, APOA4, APOE	0.0131216
GO:0004175 endopeptidase activity	PSMB7, F9, PSMB8, PSMB9	0.013298
GO:0051082 unfolded protein binding	HSP90AB1, CANX, CLU, HSP90B1	0.018971
GO:0005509 calcium ion binding	F9, ANXA2, CDH1, CANX, ANXA5, CALR, CALM1, LTBP1, S100A8, HGFAC, FBN1	0.0208201
GO:0005525 GTP binding	CDC42, GNAQ, RAB27A, RAC1, RAB11A, RHOA, RAN, RAB7A, GNAI2	0.0238161
GO:0004867 serine-type endopeptidase inhibitor activity	SERPINA1, COL7A1, SPINK5, COL6A3, SERPINA7	0.0294159
GO:0042803 protein homodimerization activity	TPI1, IDH1, CAT, APOA2, APOA1, MYH9, SLC4A1, APOE	0.0484484
Cellular compartment
GO:0034361 very-low-density lipoprotein particle	APOH, APOC2, APOC1, APOA2, APOC3, APOE	7.80697e-06
GO:0042627 chylomicron	APOH, APOC2, APOA2, APOC3, APOA4, APOE	2.58303e-05
GO:0034364 high-density lipoprotein particle	APOH, APOC1, APOA1, APOA4, APOE, PLA2G7	6.51189e-05
GO:0042470 melanosome	TFRC, CANX, RAB27A, RAC1, ATP1A1, RAN, HSP90B1	0.000408423
GO:0031012 extracellular matrix	COL1A1, LOC609026, MMP2, COL6A3, APOE, TIMP1, MMP9	0.00270552
GO:0070382 exocytic vesicle	ANXA2, RAB27A, MYH9, RAB11A, RAB7A, GNAI2	0.00732634
GO:0008305 integrin complex	ITGB3, ITGA2B, ITGB2	0.0132685
GO:0034366 spherical high-density lipoprotein particle	APOC2, APOA2, CLU	0.0132685
GO:0034362 low-density lipoprotein particle	APOC2, APOE, PLA2G7	0.0132685
GO:0005839 proteasome core complex	PSMB7, PSMB8, PSMB9	0.0132685
GO:0032991 macromolecular complex	CAT, ALB, MYH9, RAB11A, RAN, HSPD1	0.0140627
GO:0005576 extracellular region	CRP, C1QB, FGB, FGA, VWF, MMP2, F11, SPINK5, FN1, PLG, MMP9, CES5A, DKK3, SLC9A3R1, C5, COL1A2, ADAMTSL2, CALR, B2M, C1QC, LTF	0.0165111
GO:0005829 cytosol	TPI1, IDH1, SPINK5, STXBP2, CLU, RHOA, GNAI2, PSMB9, MYH9, CALR, RAC1, GAPDH, GLUL, RAN, RAB7A	0.0228778
GO:0042995 cell projection	SLC2A3, RAC1, RHOA, CD44	0.034238
GO:0031258 lamellipodium membrane	CDC42, VASP, CD44	0.0403817

## Sheet: Core
Gene Ontology	Genes	p value
Biological Processes
GO:0007596 blood coagulation	FGB, FGA, F8, F9, VWF, F11, RAB27A, GP1BA, PLG, SLC4A1	6.66697e-07
GO:0007155 cell adhesion	SELP, VCAM1, VWF, COL7A1, ITGA2B, FN1, MYH9, COL6A3, GP1BA, THY1, CD44	0.000214862
GO:0042157 lipoprotein metabolic process	APOC1, APOA2, APOA1, APOC3, APOA4	0.00027735
GO:0033700 phospholipid efflux	APOC2, APOA2, APOA4, APOE	0.00117836
GO:0006641 triglyceride metabolic process	APOH, APOC1, CAT, APOE	0.00279954
GO:0033344 cholesterol efflux	APOC2, APOA2, APOA4, APOE	0.00279954
GO:0007229integrin-mediated signaling pathway	ADAMTS13, ITGB3, ITGA2B, ITGB2, ADAM10	0.00313181
GO:0050821 protein stabilization	APOA2, APOA1, CALR, GAPDH, CLU	0.00466514
GO:0006457 protein folding	HSP90AB1, HSPA4, CANX, HSP90B1	0.00885312
GO:0010499 proteasomal ubiquitin-independent protein catabolic process	PSMB7, PSMB8, PSMB9	0.0132489
GO:0034384 high-density lipoprotein particle clearance	APOC2, APOA2, APOE	0.0132489
GO:0051006 positive regulation of lipoprotein lipase activity	APOH, APOC2, APOA4	0.0132489
GO:0043691 reverse cholesterol transport	APOA2, APOA4, APOE	0.0132489
GO:0070328 triglyceride homeostasis	APOC2, APOA4, APOE	0.0132489
GO:0034380 high-density lipoprotein particle assembly	APOA2, APOA4, APOE	0.0132489
GO:0051603 proteolysis involved in cellular protein catabolic process	PSMB7, PSMB8, CTSS, PSMB9	0.0134677
GO:0006869 lipid transport	APOC2, APOC1, APOA1, APOC3	0.0192103
GO:0008360 regulation of cell shape	SLC9A3R1, FN1, MYH9, RAC1, RHOA	0.0197254
GO:0043161 proteasome-mediated ubiquitin-dependent protein catabolic process	PSMB7, PSMB8, PSMB9	0.0253194
GO:0045198 establishment of epithelial cell apical/basal polarity	CDC42, SLC9A3R1, RHOA	0.0253194
Molecular function
GO:0003924 GTPase activity	CDC42, GNAQ, GNB1, RAB27A, RAC1, RHOA, RAN, GNAI2	0.00286254
GO:0005178 integrin binding	VCAM1, VWF, ITGB3, MYH9, THY1	0.00351007
GO:0004175 endopeptidase activity	PSMB7, F9, PSMB8, PSMB9	0.00644476
GO:0004298 threonine-type endopeptidase activity	PSMB7, PSMB8, PSMB9	0.00788282
GO:0060228 phosphatidylcholine-sterol O-acyltransferase activator activity	APOA2, APOA4, APOE	0.00788282
GO:0051082 unfolded protein binding	HSP90AB1, CANX, CLU, HSP90B1	0.00930331
GO:0042803 protein homodimerization activity	TPI1, IDH1, CAT, APOA2, APOA1, MYH9, SLC4A1, APOE	0.0135502
GO:0005525 GTP binding	CDC42, GNAQ, RAB27A, RAC1, RHOA, RAN, RAB7A, GNAI2	0.0183984
GO:0005543 phospholipid binding	APOH, APOA4, APOE	0.0480765
GO:0016887 ATPase activity	MYH9, ATP1A1, HSP90B1	0.0480765
Cellular compartment
GO:0034361 very-low-density lipoprotein particle	APOH, APOC2, APOC1, APOA2, APOC3, APOE	2.33171e-06
GO:0042627 chylomicron	APOH, APOC2, APOA2, APOC3, APOA4, APOE	7.81377e-06
GO:0034364 high-density lipoprotein particle	APOH, APOC1, APOA1, APOA4, APOE, PLA2G7	1.99509e-05
GO:0042470 melanosome	TFRC, CANX, RAB27A, RAC1, ATP1A1, RAN, HSP90B1	0.000106741
GO:0031012 extracellular matrix	COL1A1, LOC609026, COL6A3, APOE, TIMP1, MMP9	0.00512814
GO:0005829 cytosol	TPI1, IDH1, STXBP2, CLU, RHOA, GNAI2, PSMB9, MYH9, CALR, RAC1, GAPDH, GLUL, RAN, RAB7A	0.00747572
GO:0005839 proteasome core complex	PSMB7, PSMB8, PSMB9	0.00828069
GO:0008305 integrin complex	ITGB3, ITGA2B, ITGB2	0.00828069
GO:0034366 spherical high-density lipoprotein particle	APOC2, APOA2, CLU	0.00828069
GO:0034362 low-density lipoprotein particle	APOC2, APOE, PLA2G7	0.00828069
GO:0042995 cell projection	SLC2A3, RAC1, RHOA, CD44	0.0181218
GO:0031258 lamellipodium membrane	CDC42, VASP, CD44	0.0257088
GO:0032991 macromolecular complex	CAT, ALB, MYH9, RAN, HSPD1	0.0271743
GO:0005856 cytoskeleton	VASP, TPM4, TPM3, TPM1, RAC1, RHOA	0.0363689
GO:0043197 dendritic spine	CDC42, RAC1, RHOA	0.0372256

## Sheet: Unique to Healthy
Gene Ontology	Genes	p value
Biological Processes
GO:0016192 vesicle-mediated transport	RAB10, RAB2A, GDI1, GDI2, ARF6	0.000262726
GO:0030100 regulation of endocytosis	RAB4B, RAB5C, RAB5A	0.00470537
GO:0006165 nucleoside diphosphate phosphorylation	AK1, NME2, NME1	0.00470537
GO:0006886 intracellular protein transport	RAB1A, RAB5C, RAB5A, ARF6	0.00824359
GO:0015031 protein transport	RAB2A, RAB4B, GDI1, GDI2, CMTM6	0.0120484
GO:0007030 Golgi organization	RAB2A, RAB1A, RAB8A	0.0148794
GO:0032456 endocytic recycling	CMTM6, RAB8A, ARF6	0.0148794
GO:0006897 endocytosis	RAB1A, RAB5C, RAB5A, NME1	0.020251
GO:0006909 phagocytosis	NCF2, RAB5A, ELANE	0.029652
Molecular function
GO:0003924 GTPase activity	CDC42, GNAQ, GNB1, RAB27A, RAC1, RHOA, RAN, GNAI2	0.00369545
GO:0005178 integrin binding	VCAM1, VWF, ITGB3, MYH9, THY1	0.0041321
GO:0004175 endopeptidase activity	PSMB7, F9, PSMB8, PSMB9	0.00730758
GO:0060228 phosphatidylcholine-sterol O-acyltransferase activator activity	APOA2, APOA4, APOE	0.00860583
GO:0004298 threonine-type endopeptidase activity	PSMB7, PSMB8, PSMB9	0.00860583
GO:0051082 unfolded protein binding	HSP90AB1, CANX, CLU, HSP90B1	0.0105297
GO:0042803 protein homodimerization activity	TPI1, IDH1, CAT, APOA2, APOA1, MYH9, SLC4A1, APOE	0.0170622
GO:0005525 GTP binding	CDC42, GNAQ, RAB27A, RAC1, RHOA, RAN, RAB7A, GNAI2	0.0230254
GO:0004252 serine-type endopeptidase activity	F9, F11, HP, PLG, KLKB1, HGFAC	0.0434542
GO:0005515 protein binding	TGFB1, HSPA4, CANX, STXBP2, RAB7A	0.0500624
Cellular compartment
GO:0034361 very-low-density lipoprotein particle	APOH, APOC2, APOC1, APOA2, APOC3, APOE	2.7244e-06
GO:0042627 chylomicron	APOH, APOC2, APOA2, APOC3, APOA4, APOE	9.11637e-06
GO:0034364 high-density lipoprotein particle	APOH, APOC1, APOA1, APOA4, APOE, PLA2G7	2.32429e-05
GO:0042470 melanosome	TFRC, CANX, RAB27A, RAC1, ATP1A1, RAN, HSP90B1	0.000127097
GO:0005829 cytosol	TPI1, IDH1, STXBP2, CLU, RHOA, GNAI2, PSMB9, MYH9, CALR, RAC1, GAPDH, GLUL, RAN, RAB7A, GALK1	0.0036853

## Sheet: Unique to CanL
Gene Ontology	Genes	p value
Biological Processes
GO:0002474 antigen processing and presentation of peptide antigen via MHC class I	DLA88, B2M	0.0355001
Molecular function
GO:0005509 calcium ion binding	ANXA2, CDH1, ANXA5, LTBP1, S100A8, FBN1	0.00487837
GO:0005544 calcium-dependent phospholipid binding	ANXA2, ANXA5	0.0928751
Cellular compartment
GO:0042612 MHC class I protein complex	DLA88, B2M	0.030015
GO:0005768 endosome	ANXA2, CDH1, RAB11A	0.0612616
