# Supplementary material for: Characterization and Proteomic Analysis of Plasma EVs Recovered from Healthy and Diseased Dogs with Canine Leishmaniosis
Source: Int J Mol Sci. 2023 Mar 13;24(6):5490. doi: 10.3390/ijms24065490 (PMC10056832; doi:10.3390/ijms24065490)
Supplement: Supplementary file 1 [file ijms-24-05490-s001.zip › ijms-2208855-supplementary/Table S4.xlsx]

## Sheet: Table S4
									Healthy
Protein FDR Confidence	Accession	Description	Marked as	Peptides	PSMs	Unique Peptides	Abundance Ratio: (Positive) / (Negative)	Abundance Ratio Adj. P-Value: (Positive) / (Negative)	1	2	3	4	5	6	7	8	9	10	11	12	13	14	15	16	17	18	19	20	21	22	23	24	25	26	27	28	29	30	31	32	33	34	35	36	37	38	39	40	41
High	E2QTD8	Myo-inositol oxygenase OS=Canis lupus familiaris OX=9615 GN=MIOX PE=4 SV=2	C_familiaris	3	15	3	0.01	1.65492e-16	Not Found	Not Found	Not Found	1	Not Found	1	1	1	1	1	1	1	1	1	1	1	1	1	1	1	1	1	1	1	1	1	1	1	1	1	1	1	1	1	1	1	1	1	1	1	1
High	E2QXD6	Glyoxalase domain containing 4 OS=Canis lupus familiaris OX=9615 GN=GLOD4 PE=4 SV=3	C_familiaris	2	12	2	0.093	0.120354	1	Not Found	1	1	1	1	Not Found	1	1	1	1	1	1	1	1	1	1	1	1	1	1	1	1	1	1	1	1	1	1	1	1	1	1	1	1	1	1	1	1	1	1
High	E2RDX0	Uncharacterized protein OS=Canis lupus familiaris OX=9615 PE=4 SV=2	C_familiaris	3	5	3	0.268	0.761211	1	1	1	1	Not Found	Not Found	1	1	1	1	1	1	1	1	1	1	1	1	1	1	1	1	1	1	1	1	1	1	1	1	1	1	1	1	1	1	1	1	1	1	1
High	J9P4N4	CD59 molecule OS=Canis lupus familiaris OX=9615 GN=CD59 PE=4 SV=2	C_familiaris	3	28	3	0.33	0.884543	1	1	1	1	Not Found	1	1	Not Found	1	1	1	1	1	1	1	1	1	1	1	1	1	1	1	1	1	1	1	1	1	1	1	1	1	1	1	1	1	1	1	1	1
High	A0A5F4DA40	Uncharacterized protein OS=Canis lupus familiaris OX=9615 GN=EIF5A PE=4 SV=1	C_familiaris	2	17	2	0.417	0.910769	Not Found	1	1	1	Not Found	Not Found	Not Found	1	1	1	1	1	1	1	1	1	1	1	1	1	1	1	1	1	1	1	1	1	1	1	1	1	1	1	1	1	1	1	1	1	1
High	F1PBM2	Vesicle trafficking 1 OS=Canis lupus familiaris OX=9615 GN=VTA1 PE=4 SV=2	C_familiaris	2	9	2	0.028	0.000862124	Not Found	Not Found	1	1	1	Not Found	Not Found	1	1	1	1	1	1	1	1	1	1	1	1	1	1	1	1	1	1	1	1	1	1	1	1	1	1	1	1	1	1	1	Not Found	1	1
High	A0A5F4CCT6	Phosphoribosyl pyrophosphate synthetase 2 OS=Canis lupus familiaris OX=9615 GN=PRPS2 PE=4 SV=1	C_familiaris	4	9	2	1.303	0.952731	1	1	Not Found	Not Found	Not Found	Not Found	1	1	1	1	1	1	1	1	1	1	1	1	Not Found	Not Found	1	1	1	1	1	1	1	1	1	1	1	1	1	1	1	1	1	1	1	1	1
High	F1PB96	ICAM_N domain-containing protein OS=Canis lupus familiaris OX=9615 GN=ICAM4 PE=4 SV=3	C_familiaris	2	3	2	0.449	0.933819	1	1	1	1	Not Found	Not Found	Not Found	1	1	1	1	1	1	1	1	1	1	1	Not Found	Not Found	Not Found	1	1	1	1	1	1	1	1	1	1	1	1	1	1	1	1	1	1	1	1
High	E2R913	Calcium regulated heat stable protein 1 OS=Canis lupus familiaris OX=9615 GN=CARHSP1 PE=4 SV=2	C_familiaris	4	29	4	0.807	0.975161	1	1	Not Found	1	1	Not Found	1	1	1	1	1	1	1	1	1	1	1	1	1	1	1	1	1	1	1	1	1	1	1	1	1	1	1	1	1	1	1	1	1	1	1
High	A0A5F4DD49	Serine incorporator 3 OS=Canis lupus familiaris OX=9615 GN=SERINC3 PE=4 SV=1	C_familiaris	2	7	2	0.01	1.65492e-16	Not Found	1	1	1	Not Found	1	Not Found	1	1	1	1	1	1	1	1	1	1	1	1	1	1	1	1	1	1	1	1	1	1	1	1	1	1	1	1	Not Found	Not Found	Not Found	1	1	Not Found
High	F1Q2X9	Solute carrier family 11 member 2 OS=Canis lupus familiaris OX=9615 GN=SLC11A2 PE=3 SV=3	C_familiaris	2	14	2	0.277	0.796929	Not Found	Not Found	1	1	Not Found	1	1	1	1	1	Not Found	1	1	1	1	1	1	1	1	1	1	1	1	1	1	1	1	1	1	1	1	1	1	1	1	1	1	1	1	1	1
High	A0A5F4D4K2	Late endosomal/lysosomal adaptor, MAPK and MTOR activator 1 OS=Canis lupus familiaris OX=9615 GN=LAMTOR1 PE=4 SV=1	C_familiaris	2	2	2	1.068	0.972144	Not Found	Not Found	Not Found	Not Found	Not Found	1	Not Found	1	1	1	1	1	1	1	1	1	1	1	Not Found	Not Found	1	1	1	1	1	1	1	1	1	1	1	1	1	1	1	1	1	1	1	1	Not Found
High	J9P5F0	Rho GTPase activating protein 45 OS=Canis lupus familiaris OX=9615 GN=ARHGAP45 PE=3 SV=2	C_familiaris	3	16	3	0.165	0.43692	Not Found	1	1	1	1	Not Found	Not Found	1	1	1	1	1	1	1	1	1	1	1	1	1	1	1	1	1	1	1	1	1	1	1	1	1	1	1	1	1	1	1	1	1	1
High	E2R020	Ras homolog family member G OS=Canis lupus familiaris OX=9615 GN=RHOG PE=4 SV=3	C_familiaris	3	18	2	0.254	0.632247	1	1	1	1	Not Found	Not Found	Not Found	1	1	1	1	1	1	1	1	1	1	1	1	1	1	1	1	1	1	1	1	1	1	1	1	1	1	1	1	1	1	1	1	1	1
High	A0A5F4C357	Phospholipid scramblase 4 OS=Canis lupus familiaris OX=9615 GN=PLSCR4 PE=4 SV=1	C_familiaris	2	3	2	0.261	0.650726	1	1	1	1	Not Found	Not Found	Not Found	1	1	1	1	1	1	1	1	1	1	1	1	Not Found	Not Found	1	1	1	1	1	1	1	1	1	1	1	1	1	1	1	1	Not Found	1	1	1
High	A0A5F4D5P6	Erbb2 interacting protein OS=Canis lupus familiaris OX=9615 GN=ERBIN PE=4 SV=1	C_familiaris	2	5	2	1.365	0.953219	1	1	1	1	Not Found	Not Found	Not Found	1	1	1	1	1	1	1	1	1	1	1	1	1	1	1	1	1	1	1	1	1	1	1	1	1	1	1	1	1	1	1	1	1	1
High	E2QXY0	Phosphoprotein membrane anchor with glycosphingolipid microdomains 1 OS=Canis lupus familiaris OX=9615 GN=PAG1 PE=4 SV=1	C_familiaris	2	5	2	0.412	0.897378	1	1	Not Found	Not Found	Not Found	Not Found	Not Found	1	1	1	1	1	1	1	1	1	1	1	1	1	1	1	1	1	1	1	1	1	1	1	1	1	1	1	1	1	1	1	1	1	1
High	E2RGI4	Chloride intracellular channel protein OS=Canis lupus familiaris OX=9615 GN=CLIC4 PE=3 SV=1	C_familiaris	2	12	2	0.706	0.952731	Not Found	1	1	Not Found	Not Found	Not Found	Not Found	1	1	1	Not Found	1	1	1	1	1	1	1	1	1	1	1	1	1	1	1	1	1	1	1	1	1	1	1	1	1	1	1	Not Found	Not Found	Not Found
High	E2R3J3	G protein subunit alpha z OS=Canis lupus familiaris OX=9615 GN=GNAZ PE=4 SV=1	C_familiaris	2	3	2	0.01	1.65492e-16	1	1	1	1	1	1	Not Found	1	1	1	1	1	1	1	1	Not Found	Not Found	Not Found	1	Not Found	Not Found	Not Found	Not Found	Not Found	Not Found	Not Found	Not Found	1	1	1	1	1	Not Found	1	Not Found	Not Found	1	Not Found	1	1	1
High	A0A5F4D669	Charged multivesicular body protein 6 OS=Canis lupus familiaris OX=9615 GN=CHMP6 PE=4 SV=1	C_familiaris	3	12	3	0.473	0.933819	1	1	1	1	Not Found	Not Found	Not Found	1	1	1	1	1	1	1	1	1	1	1	1	1	1	1	1	1	1	1	1	1	1	1	1	1	1	1	1	1	1	1	1	1	1
High	E2R0R1	Proteasome 26S subunit, non-ATPase 9 OS=Canis lupus familiaris OX=9615 GN=PSMD9 PE=4 SV=2	C_familiaris	2	3	2	0.254	0.736041	Not Found	Not Found	Not Found	Not Found	Not Found	Not Found	1	Not Found	Not Found	1	1	1	1	1	1	1	1	1	1	1	1	1	1	1	1	1	1	1	1	1	1	1	1	1	1	1	1	1	1	1	Not Found
High	F1PL20	Serine incorporator 1 OS=Canis lupus familiaris OX=9615 GN=SERINC1 PE=4 SV=2	C_familiaris	3	36	3	0.571	0.938246	1	1	1	1	1	1	Not Found	1	1	1	1	1	1	1	1	1	1	1	1	1	1	1	1	1	1	1	1	1	1	1	1	1	1	1	1	1	1	1	1	1	1
High	E2R629	Atypical chemokine receptor 1 OS=Canis lupus familiaris OX=9615 GN=ACKR1 PE=4 SV=1	C_familiaris	2	35	2	0.036	0.012782	1	1	1	1	Not Found	Not Found	1	1	1	1	1	1	1	1	1	1	1	1	1	1	1	1	1	1	1	1	1	1	1	1	1	1	1	1	1	1	1	1	1	1	1
High	E2REA8	COP9 signalosome subunit 2 OS=Canis lupus familiaris OX=9615 GN=COPS2 PE=4 SV=3	C_familiaris	7	24	7	0.25	0.692859	1	1	1	1	Not Found	1	Not Found	1	1	1	1	1	1	1	1	1	1	1	1	1	1	1	1	1	1	1	1	1	1	1	1	1	1	1	1	1	1	1	1	1	1
High	F1PEZ2	Nucleoside diphosphate kinase OS=Canis lupus familiaris OX=9615 GN=NME4 PE=3 SV=3	C_familiaris	7	44	3	0.254	0.736041	1	1	1	Not Found	1	1	Not Found	1	1	1	1	1	1	1	1	1	1	1	1	1	1	1	1	1	1	1	1	1	1	1	1	1	1	1	1	1	1	1	1	1	1
High	E2RSX8	Latexin OS=Canis lupus familiaris OX=9615 GN=LXN PE=4 SV=1	C_familiaris	2	11	2	0.205	0.608424	1	1	1	1	Not Found	Not Found	Not Found	1	1	1	1	1	1	1	1	1	1	1	1	1	1	1	1	1	1	1	1	1	1	1	1	1	1	1	1	1	1	1	1	1	1
High	F1PP08	Dipeptidyl peptidase 4 OS=Canis lupus familiaris OX=9615 GN=DPP4 PE=3 SV=3	C_familiaris	3	5	3	1.008	0.991543	1	Not Found	Not Found	Not Found	1	1	1	Not Found	1	Not Found	1	Not Found	1	1	1	1	1	1	1	1	1	Not Found	Not Found	Not Found	1	1	1	1	1	1	1	1	1	1	1	1	1	1	1	1	Not Found
High	A0A5F4CD04	Abl interactor 1 OS=Canis lupus familiaris OX=9615 GN=ABI1 PE=4 SV=1	C_familiaris	2	2	2	1.098	0.995619	1	1	1	1	Not Found	Not Found	Not Found	1	1	1	1	1	1	1	1	1	1	1	Not Found	Not Found	Not Found	Not Found	Not Found	Not Found	1	1	Not Found	1	1	1	1	1	1	1	1	Not Found	Not Found	Not Found	Not Found	Not Found	1
High	A0A5F4DAV6	ATP binding cassette subfamily C member 4 OS=Canis lupus familiaris OX=9615 GN=ABCC4 PE=4 SV=1	C_familiaris	8	12	8	1.295	0.952461	1	1	1	1	1	1	1	1	1	1	1	1	1	1	1	1	1	1	1	1	1	1	1	1	1	1	1	1	1	1	1	1	1	1	1	1	1	1	1	1	1
High	E2R5G6	RAS related OS=Canis lupus familiaris OX=9615 GN=RRAS PE=4 SV=1	C_familiaris	2	5	2	0.282	0.757084	1	1	1	1	Not Found	Not Found	Not Found	1	1	1	1	1	1	1	1	1	1	1	1	1	1	1	1	1	1	1	1	1	1	1	1	1	1	1	1	1	1	1	1	1	1
High	A0A5F4CDM2	Damage specific DNA binding protein 1 OS=Canis lupus familiaris OX=9615 GN=DDB1 PE=4 SV=1	C_familiaris	2	2	2	0.166	0.43692	1	1	Not Found	1	1	1	1	1	1	1	1	1	1	1	1	1	1	1	1	1	1	1	1	1	1	1	1	1	1	1	1	1	1	1	1	1	1	1	Not Found	Not Found	Not Found
High	F6XEV4	Uncharacterized protein OS=Canis lupus familiaris OX=9615 PE=4 SV=2	C_familiaris	2	10	2	0.403	0.933819	1	1	1	1	Not Found	Not Found	Not Found	1	1	1	1	1	1	1	1	1	1	1	1	1	1	1	1	1	1	1	1	1	1	1	1	1	1	1	1	1	1	1	1	Not Found	1
High	J9NRK8	Fructosamine 3 kinase OS=Canis lupus familiaris OX=9615 GN=FN3K PE=4 SV=2	C_familiaris	2	7	2	0.504	0.935358	1	1	1	Not Found	Not Found	Not Found	Not Found	1	1	1	1	1	1	1	1	1	1	1	1	1	1	1	1	1	1	1	1	1	1	1	1	1	1	1	Not Found	1	1	1	1	1	1
High	E2RJW7	Adducin 1 OS=Canis lupus familiaris OX=9615 GN=ADD1 PE=4 SV=3	C_familiaris	26	422	2	0.22	0.612633	1	1	Not Found	Not Found	1	Not Found	1	1	1	1	1	1	1	1	1	1	1	1	1	1	1	1	1	1	1	1	1	1	1	Not Found	Not Found	Not Found	1	Not Found	Not Found	1	1	Not Found	1	1	1
High	A0A5F4CI04	Uncharacterized protein OS=Canis lupus familiaris OX=9615 GN=SCAMP3 PE=4 SV=1	C_familiaris	2	4	2	0.471	0.933819	Not Found	Not Found	1	1	Not Found	Not Found	1	1	1	1	1	1	1	1	1	1	1	1	1	Not Found	1	1	1	1	1	1	1	1	1	1	1	1	Not Found	1	1	1	1	Not Found	Not Found	Not Found	Not Found
High	J9P121	MINDY lysine 48 deubiquitinase 1 OS=Canis lupus familiaris OX=9615 GN=MINDY1 PE=4 SV=2	C_familiaris	2	10	2	0.97	0.995619	1	Not Found	Not Found	Not Found	1	1	1	1	1	Not Found	1	1	1	1	1	1	1	1	Not Found	Not Found	Not Found	1	Not Found	1	1	1	1	1	1	1	1	1	1	1	1	1	1	1	1	Not Found	Not Found
High	A0A5F4DFG9	Phosphoribosyl pyrophosphate synthetase 1 OS=Canis lupus familiaris OX=9615 GN=PRPS1 PE=4 SV=1	C_familiaris	4	14	2	0.268	0.731366	1	1	1	1	Not Found	Not Found	Not Found	1	1	1	1	1	1	1	1	1	1	1	1	1	Not Found	1	1	1	1	1	1	Not Found	Not Found	1	Not Found	Not Found	Not Found	Not Found	Not Found	Not Found	Not Found	Not Found	Not Found	Not Found	1
High	E2R2A1	Golgin A7 OS=Canis lupus familiaris OX=9615 GN=GOLGA7 PE=4 SV=2	C_familiaris	3	7	3	0.311	0.839973	1	1	1	1	1	1	1	1	1	1	1	1	1	1	1	1	1	1	1	1	1	1	1	1	1	1	1	1	1	1	1	1	1	1	1	1	1	1	1	1	1
High	J9P3F4	Stum, mechanosensory transduction mediator homolog OS=Canis lupus familiaris OX=9615 GN=STUM PE=4 SV=2	C_familiaris	2	29	2	0.105	0.207503	1	1	1	1	Not Found	Not Found	Not Found	1	1	1	1	1	1	1	1	1	1	1	1	1	1	1	1	1	1	1	1	1	1	1	1	1	1	1	1	1	1	1	1	1	1
High	F1PPI5	Amino acid transporter OS=Canis lupus familiaris OX=9615 GN=SLC1A5 PE=3 SV=2	C_familiaris	2	4	2	0.323	0.796929	Not Found	1	1	1	1	Not Found	1	1	1	1	Not Found	1	1	1	1	1	1	1	1	1	1	1	1	1	1	1	1	1	1	1	1	1	1	1	1	1	1	1	1	1	Not Found
High	J9P972	DAZ associated protein 1 OS=Canis lupus familiaris OX=9615 GN=DAZAP1 PE=4 SV=2	C_familiaris	3	10	3	0.261	0.7528	Not Found	Not Found	1	1	Not Found	Not Found	Not Found	1	1	1	1	1	1	1	1	1	1	1	1	1	1	1	1	1	1	1	1	1	1	1	1	1	1	1	1	1	1	1	1	1	Not Found
High	F1Q0S2	Sodium/potassium-transporting ATPase subunit beta OS=Canis lupus familiaris OX=9615 GN=ATP1B3 PE=3 SV=3	C_familiaris	2	8	2	0.333	0.884543	1	1	1	1	1	Not Found	Not Found	1	1	1	1	1	1	1	Not Found	1	1	1	1	1	1	1	1	1	1	1	1	1	1	1	1	1	1	1	1	1	1	1	Not Found	Not Found	Not Found
High	J9JHE0	Protein kinase cGMP-dependent 1 OS=Canis lupus familiaris OX=9615 GN=PRKG1 PE=3 SV=2	C_familiaris	3	8	3	1.657	0.944788	1	Not Found	1	1	1	1	1	Not Found	Not Found	1	1	1	1	1	1	1	1	1	1	1	1	1	1	1	Not Found	Not Found	Not Found	Not Found	1	1	1	1	1	1	1	1	Not Found	Not Found	Not Found	Not Found	Not Found
High	J9PAW2	Importin subunit alpha OS=Canis lupus familiaris OX=9615 GN=KPNA4 PE=3 SV=1	C_familiaris	3	5	2	0.441	0.933819	1	Not Found	Not Found	1	Not Found	Not Found	Not Found	1	1	1	Not Found	1	1	1	1	Not Found	1	1	1	Not Found	1	1	Not Found	1	1	1	Not Found	1	1	1	1	Not Found	1	1	1	1	1	1	Not Found	Not Found	Not Found
High	A0A5F4BY19	RELT like 1 OS=Canis lupus familiaris OX=9615 GN=RELL1 PE=4 SV=1	C_familiaris	6	14	6	0.136	0.339668	1	1	1	1	Not Found	1	1	1	1	1	1	1	1	1	1	1	1	1	Not Found	Not Found	1	1	1	1	1	1	1	1	1	1	1	1	1	1	1	1	1	1	1	1	1
High	F1P7S2	EH domain binding protein 1 like 1 OS=Canis lupus familiaris OX=9615 GN=EHBP1L1 PE=4 SV=3	C_familiaris	11	57	11	0.302	0.825142	1	1	1	1	Not Found	Not Found	Not Found	1	1	1	1	1	1	1	1	1	1	1	1	1	1	1	1	1	1	1	1	1	1	1	1	1	1	1	1	1	1	1	1	1	1
High	J9NRZ2	RAB18, member RAS oncogene family OS=Canis lupus familiaris OX=9615 GN=RAB18 PE=4 SV=1	C_familiaris	3	10	3	0.684	0.952731	Not Found	1	1	1	Not Found	1	Not Found	1	1	1	1	1	1	1	1	1	1	1	1	1	1	1	1	1	1	1	1	1	1	1	1	1	1	1	1	1	1	1	1	1	1
High	E2RTD6	Hydroxymethylbilane synthase OS=Canis lupus familiaris OX=9615 GN=HMBS PE=3 SV=2	C_familiaris	5	14	5	0.273	0.803294	Not Found	Not Found	Not Found	Not Found	Not Found	Not Found	Not Found	1	1	1	1	1	1	1	1	1	1	1	1	1	1	1	1	1	1	1	1	1	1	1	1	1	1	1	1	1	1	1	1	1	1
High	A0A5F4CGS2	Uncharacterized protein OS=Canis lupus familiaris OX=9615 GN=GSTP1 PE=4 SV=1	C_familiaris	3	7	3	0.529	0.933819	Not Found	Not Found	1	Not Found	Not Found	Not Found	Not Found	1	1	Not Found	1	Not Found	1	1	1	1	1	1	Not Found	Not Found	1	1	1	1	1	1	1	1	1	1	1	1	Not Found	Not Found	Not Found	1	1	1	Not Found	Not Found	1
High	A0A5F4CCI6	Serine/threonine kinase 24 OS=Canis lupus familiaris OX=9615 GN=STK24 PE=4 SV=1	C_familiaris	2	5	2	0.01	1.65492e-16	1	Not Found	1	Not Found	Not Found	Not Found	1	1	1	1	1	1	Not Found	1	Not Found	Not Found	Not Found	Not Found	Not Found	Not Found	Not Found	1	1	1	1	1	1	1	1	1	1	1	Not Found	1	Not Found	1	1	1	Not Found	Not Found	Not Found
High	E2RK13	Protein XRP2 OS=Canis lupus familiaris OX=9615 GN=RP2 PE=3 SV=1	C_familiaris	2	5	2	0.01	1.65492e-16	Not Found	1	1	1	Not Found	1	1	1	1	1	1	1	1	Not Found	Not Found	Not Found	Not Found	Not Found	1	Not Found	Not Found	Not Found	Not Found	1	1	Not Found	Not Found	Not Found	1	1	1	1	Not Found	1	1	1	1	1	Not Found	1	Not Found
High	A0A5F4CB33	ANTXR cell adhesion molecule 2 OS=Canis lupus familiaris OX=9615 GN=ANTXR2 PE=4 SV=1	C_familiaris	2	6	2	1.63	0.952439	1	1	1	1	1	1	1	1	Not Found	Not Found	1	1	1	1	1	1	1	1	Not Found	Not Found	Not Found	Not Found	1	1	1	1	1	1	1	1	1	1	Not Found	1	1	1	Not Found	Not Found	1	1	Not Found
High	H9GWC7	Fructosamine 3 kinase related protein OS=Canis lupus familiaris OX=9615 GN=FN3KRP PE=3 SV=3	C_familiaris	5	10	5	0.103	0.119224	1	1	1	1	1	1	1	1	1	1	1	1	1	1	1	1	1	1	1	1	1	1	1	1	1	1	1	1	1	1	1	1	1	1	1	1	1	1	1	1	1
High	P55745	Ras-related protein Rab-21 OS=Canis lupus familiaris OX=9615 GN=RAB21 PE=3 SV=3	C_familiaris	5	12	5	0.428	0.933819	Not Found	1	1	1	1	1	1	1	1	1	1	1	1	1	1	1	1	1	1	1	1	1	1	1	1	1	1	1	1	1	1	1	1	1	1	1	1	1	1	1	1
High	J9JHN1	RAB11B, member RAS oncogene family OS=Canis lupus familiaris OX=9615 GN=RAB11B PE=4 SV=1	C_familiaris	11	224	2	0.369	0.890127	1	1	1	1	Not Found	1	Not Found	1	1	1	1	1	1	1	1	1	1	1	1	1	1	1	1	1	1	1	1	1	1	1	1	1	1	1	1	1	1	1	1	1	1
High	F1PRW7	Transportin 2 OS=Canis lupus familiaris OX=9615 GN=TNPO2 PE=4 SV=2	C_familiaris	9	18	7	0.32	0.811316	Not Found	Not Found	1	1	1	1	1	1	1	1	1	1	1	1	1	1	1	1	1	1	Not Found	1	1	1	1	1	1	1	1	1	1	1	1	1	1	1	1	1	1	1	Not Found
High	E2RQC0	C-type lectin domain family 3 member A OS=Canis lupus familiaris OX=9615 GN=CLEC3A PE=4 SV=1	C_familiaris	4	4	4	1.41	0.953219	1	1	1	1	1	1	1	1	1	1	1	1	1	1	1	Not Found	1	1	1	1	1	1	Not Found	Not Found	1	Not Found	1	Not Found	Not Found	Not Found	1	1	1	1	1	1	1	1	1	1	Not Found
High	E2QY31	Platelet-activating factor acetylhydrolase IB subunit alpha OS=Canis lupus familiaris OX=9615 GN=PAFAH1B1 PE=3 SV=1	C_familiaris	3	13	3	1.306	0.971475	1	1	1	1	1	1	1	1	1	1	1	1	1	1	1	1	1	1	1	1	1	1	1	1	Not Found	1	1	1	1	1	1	1	1	1	1	1	1	1	Not Found	1	1
High	F1PD06	NAD(P)(+)--arginine ADP-ribosyltransferase OS=Canis lupus familiaris OX=9615 GN=ART4 PE=3 SV=2	C_familiaris	2	8	2	0.217	0.526021	1	1	1	1	Not Found	Not Found	Not Found	1	1	1	1	1	1	1	1	1	1	1	1	1	1	1	1	1	1	1	1	1	1	1	1	1	1	1	1	1	1	1	1	1	1
High	E2RL17	Eukaryotic translation initiation factor 2 subunit alpha OS=Canis lupus familiaris OX=9615 GN=EIF2S1 PE=4 SV=1	C_familiaris	2	2	2	0.389	0.884543	Not Found	Not Found	Not Found	Not Found	Not Found	Not Found	Not Found	1	1	1	1	1	1	1	1	1	1	1	Not Found	Not Found	Not Found	1	Not Found	1	1	1	1	1	1	1	1	1	Not Found	Not Found	Not Found	Not Found	Not Found	Not Found	Not Found	Not Found	1
High	E2R2M7	RAP1A, member of RAS oncogene family OS=Canis lupus familiaris OX=9615 GN=RAP1A PE=4 SV=1	C_familiaris	11	404	3	0.244	0.695163	1	1	1	1	Not Found	Not Found	Not Found	1	1	1	1	1	1	1	1	1	1	1	1	1	1	1	1	1	1	1	1	1	1	1	1	1	1	1	1	1	1	1	1	1	1
High	E2RHL4	ADP ribosylation factor 6 OS=Canis lupus familiaris OX=9615 GN=ARF6 PE=3 SV=2	C_familiaris	2	6	2	0.574	0.938246	1	Not Found	1	1	Not Found	Not Found	1	1	1	1	1	Not Found	1	1	1	1	1	1	1	1	1	1	1	1	1	1	1	1	1	1	1	1	1	1	1	1	1	1	1	1	1
High	E2RAC6	Vacuolar proton pump subunit B OS=Canis lupus familiaris OX=9615 GN=ATP6V1B2 PE=3 SV=2	C_familiaris	3	12	3	0.557	0.938246	Not Found	Not Found	1	1	Not Found	Not Found	Not Found	1	1	1	Not Found	1	1	1	1	1	1	1	1	1	1	1	1	1	1	1	1	1	1	1	1	1	1	1	1	1	1	1	1	1	1
High	F1P795	RAS guanyl releasing protein 2 OS=Canis lupus familiaris OX=9615 GN=RASGRP2 PE=4 SV=2	C_familiaris	3	7	3	0.932	0.991543	Not Found	1	1	1	Not Found	Not Found	Not Found	1	1	Not Found	1	1	1	1	1	1	1	1	1	1	1	1	1	1	1	1	1	1	1	1	1	1	1	1	1	1	1	1	Not Found	1	1
High	A0A5F4BUH8	Uncharacterized protein OS=Canis lupus familiaris OX=9615 GN=USP9X PE=4 SV=1	C_familiaris	2	5	2	1.284	0.970978	1	1	1	1	Not Found	Not Found	Not Found	1	1	1	1	1	1	1	1	1	1	1	1	1	Not Found	Not Found	1	Not Found	1	1	1	1	1	1	1	1	1	1	1	1	Not Found	Not Found	1	1	Not Found
High	J9P4C5	BCL2 associated athanogene 2 OS=Canis lupus familiaris OX=9615 GN=BAG2 PE=4 SV=1	C_familiaris	2	3	2	0.343	0.890127	Not Found	Not Found	Not Found	Not Found	Not Found	Not Found	Not Found	1	1	1	1	1	1	1	1	1	1	1	Not Found	Not Found	Not Found	1	1	1	1	1	1	1	1	1	1	1	1	1	1	1	1	1	1	1	Not Found
High	E2R7S1	Calcium-transporting ATPase OS=Canis lupus familiaris OX=9615 GN=ATP2B1 PE=3 SV=3	C_familiaris	3	5	3	1.153	0.991543	1	1	1	1	Not Found	Not Found	Not Found	1	1	1	1	1	1	1	1	1	1	1	Not Found	Not Found	Not Found	1	1	1	Not Found	Not Found	1	1	1	1	1	1	Not Found	Not Found	Not Found	1	1	1	1	Not Found	Not Found
High	F1Q1S9	Uncharacterized protein OS=Canis lupus familiaris OX=9615 GN=TBC1D24 PE=4 SV=2	C_familiaris	6	62	6	0.823	0.986298	1	1	1	1	1	1	1	1	1	1	1	1	1	1	1	1	1	1	1	1	1	1	1	1	1	1	1	1	1	1	1	1	1	1	1	1	1	1	1	1	1
High	F1PAG5	Vesicle amine transport 1 OS=Canis lupus familiaris OX=9615 GN=VAT1 PE=4 SV=3	C_familiaris	5	28	5	0.191	0.419103	1	1	Not Found	1	Not Found	1	1	1	1	1	1	1	1	1	1	1	1	1	1	1	1	1	1	1	1	1	1	1	1	1	1	1	1	1	1	1	1	1	1	1	1
High	F1PI87	Obg-like ATPase 1 OS=Canis lupus familiaris OX=9615 GN=OLA1 PE=3 SV=3	C_familiaris	3	7	3	0.765	0.956644	Not Found	Not Found	1	1	Not Found	Not Found	Not Found	1	1	1	1	1	1	1	1	1	1	1	1	1	1	1	1	1	1	1	1	1	1	1	1	1	1	1	1	1	1	1	1	1	1
High	F1PQ29	Integrin subunit alpha 4 OS=Canis lupus familiaris OX=9615 GN=ITGA4 PE=3 SV=3	C_familiaris	3	6	3	1.427	0.953219	Not Found	1	1	Not Found	Not Found	Not Found	Not Found	1	1	1	1	1	1	1	1	1	1	1	Not Found	Not Found	Not Found	1	1	1	1	1	1	1	1	1	1	1	1	1	1	1	Not Found	1	1	1	1
High	A0A5F4CJX3	Adenosine kinase OS=Canis lupus familiaris OX=9615 GN=ADK PE=4 SV=1	C_familiaris	2	8	2	0.391	0.884543	Not Found	Not Found	Not Found	1	Not Found	Not Found	Not Found	1	1	1	1	1	1	1	1	1	1	1	Not Found	Not Found	Not Found	1	1	1	1	1	1	1	1	1	1	1	1	1	1	1	1	1	Not Found	Not Found	1
High	E2QT37	Nucleoporin 50 OS=Canis lupus familiaris OX=9615 GN=NUP50 PE=4 SV=2	C_familiaris	3	10	3	0.187	0.461178	Not Found	Not Found	Not Found	1	Not Found	Not Found	Not Found	1	1	1	1	1	1	1	1	1	1	1	1	1	1	1	1	1	1	1	1	1	Not Found	Not Found	1	1	1	1	1	1	1	1	Not Found	Not Found	1
High	E2R7P9	P2X purinoceptor OS=Canis lupus familiaris OX=9615 GN=P2RX1 PE=3 SV=1	C_familiaris	2	8	2	0.287	0.811316	Not Found	Not Found	1	1	Not Found	1	1	1	1	1	1	1	Not Found	Not Found	Not Found	Not Found	1	1	Not Found	Not Found	1	Not Found	Not Found	1	1	Not Found	1	Not Found	1	1	1	Not Found	1	Not Found	Not Found	1	1	1	Not Found	1	Not Found
High	P42929	Heat shock protein beta-1 OS=Canis lupus familiaris OX=9615 GN=HSPB1 PE=2 SV=1	C_familiaris	2	2	2	2.136	0.933819	Not Found	Not Found	Not Found	Not Found	Not Found	Not Found	1	Not Found	1	Not Found	1	1	1	1	1	1	1	1	Not Found	1	Not Found	1	1	1	Not Found	Not Found	Not Found	1	Not Found	Not Found	Not Found	Not Found	1	Not Found	Not Found	Not Found	Not Found	Not Found	Not Found	Not Found	1
High	F1PBG0	Protein kinase AMP-activated non-catalytic subunit gamma 1 OS=Canis lupus familiaris OX=9615 GN=PRKAG1 PE=4 SV=2	C_familiaris	2	5	2	13.181	0.0761834	Not Found	Not Found	Not Found	Not Found	1	1	1	1	1	1	1	1	1	1	1	1	1	1	Not Found	Not Found	Not Found	Not Found	Not Found	Not Found	1	1	1	1	1	1	Not Found	1	Not Found	Not Found	Not Found	Not Found	Not Found	Not Found	Not Found	Not Found	Not Found
High	F1PQ92	STE20 related adaptor beta OS=Canis lupus familiaris OX=9615 GN=STRADB PE=4 SV=2	C_familiaris	2	3	2	0.337	0.897378	Not Found	Not Found	Not Found	Not Found	Not Found	Not Found	Not Found	1	1	1	1	1	1	1	Not Found	Not Found	Not Found	Not Found	Not Found	Not Found	Not Found	Not Found	Not Found	Not Found	1	1	1	1	1	1	1	1	1	1	1	1	1	1	Not Found	Not Found	Not Found
High	E2RAL0	Rho GDP dissociation inhibitor beta OS=Canis lupus familiaris OX=9615 GN=ARHGDIB PE=4 SV=1	C_familiaris	3	17	3	0.525	0.933819	1	1	1	1	Not Found	Not Found	1	1	1	1	1	1	1	1	1	1	1	1	1	1	1	1	1	1	1	1	1	1	1	1	1	1	1	1	1	1	1	1	1	1	1
High	F1PYZ1	GLOBIN domain-containing protein OS=Canis lupus familiaris OX=9615 GN=LOC609402 PE=3 SV=3	C_familiaris	18	4207	2	0.026	0.00220318	1	1	1	1	Not Found	Not Found	Not Found	1	1	1	1	1	1	1	1	1	1	1	1	1	1	1	1	1	1	1	1	1	1	1	1	1	1	1	1	1	1	1	1	1	1
High	Q8MJD1	Neutrophil elastase OS=Canis lupus familiaris OX=9615 GN=ELANE PE=2 SV=1	C_familiaris	3	10	3	1.413	0.953219	1	1	1	1	1	1	1	Not Found	1	Not Found	1	Not Found	1	1	1	1	1	1	1	1	1	1	1	1	1	1	1	1	1	1	1	1	1	1	1	1	1	1	1	1	1
High	Q50KA9	Nucleoside diphosphate kinase A OS=Canis lupus familiaris OX=9615 GN=NME1 PE=2 SV=1	C_familiaris	6	93	4	0.184	0.494654	1	Not Found	1	1	Not Found	Not Found	Not Found	1	1	1	1	1	1	1	1	1	1	1	1	1	1	1	1	1	1	1	1	1	1	1	1	1	1	1	1	1	1	1	1	1	1
High	P18066	Ras-related protein Rab-5A OS=Canis lupus familiaris OX=9615 GN=RAB5A PE=1 SV=1	C_familiaris	5	79	2	1.097	0.972144	1	1	1	1	1	Not Found	1	1	1	1	1	1	1	1	1	Not Found	Not Found	1	1	1	1	Not Found	1	1	1	1	1	1	1	1	1	1	1	1	1	1	1	1	1	1	1
High	F1PDM3	SEC13 homolog, nuclear pore and COPII coat complex component OS=Canis lupus familiaris OX=9615 GN=SEC13 PE=3 SV=2	C_familiaris	2	6	2	0.688	0.952461	Not Found	Not Found	1	1	1	Not Found	1	1	1	Not Found	1	Not Found	1	1	1	1	1	1	1	Not Found	Not Found	1	1	1	1	1	1	1	1	1	1	1	1	1	1	1	1	1	1	1	1
High	E2RBL2	Secretory carrier-associated membrane protein OS=Canis lupus familiaris OX=9615 GN=SCAMP2 PE=3 SV=3	C_familiaris	3	10	3	0.325	0.876889	1	Not Found	1	1	Not Found	Not Found	Not Found	1	1	1	1	1	1	1	1	Not Found	Not Found	Not Found	Not Found	Not Found	Not Found	Not Found	Not Found	Not Found	1	1	1	1	1	1	1	1	1	1	1	1	1	1	1	1	1
High	F1PCH3	Enolase 1 OS=Canis lupus familiaris OX=9615 GN=ENO1 PE=3 SV=3	C_familiaris	8	87	2	0.851	0.991543	1	1	1	1	1	1	1	1	1	1	1	1	1	1	1	1	1	1	1	1	1	1	1	1	1	1	1	1	1	1	1	1	1	1	1	1	1	1	1	1	1
High	F1PUB3	Heart development protein with EGF like domains 1 OS=Canis lupus familiaris OX=9615 GN=HEG1 PE=4 SV=3	C_familiaris	5	10	5	0.716	0.952731	1	1	1	1	1	1	1	1	1	1	1	1	1	Not Found	1	1	1	1	1	1	1	1	1	1	1	1	1	1	1	1	1	1	1	1	1	1	1	1	1	1	1
High	F1PZL7	Transportin 1 OS=Canis lupus familiaris OX=9615 GN=TNPO1 PE=4 SV=3	C_familiaris	12	32	10	0.525	0.933819	Not Found	1	1	1	Not Found	1	1	1	1	1	1	1	1	1	1	1	1	1	1	1	1	1	1	1	1	1	1	1	1	1	1	1	1	1	1	1	1	1	1	1	1
High	A0A5F4CRP0	Uncharacterized protein OS=Canis lupus familiaris OX=9615 GN=CHMP5 PE=4 SV=1	C_familiaris	4	52	4	0.167	0.416236	1	1	1	1	Not Found	1	Not Found	1	1	1	1	1	1	1	1	1	1	1	1	1	1	1	1	1	1	1	1	1	1	1	1	1	1	1	1	1	1	1	1	1	Not Found
High	F6V040	AA_permease_C domain-containing protein OS=Canis lupus familiaris OX=9615 PE=4 SV=2	C_familiaris	4	28	3	0.098	0.181756	Not Found	1	1	1	Not Found	Not Found	Not Found	1	1	1	1	1	1	1	1	1	1	1	1	1	1	1	1	1	1	1	1	1	1	1	1	1	1	1	1	1	1	1	1	1	Not Found
High	E2RF06	Importin 5 OS=Canis lupus familiaris OX=9615 GN=IPO5 PE=4 SV=3	C_familiaris	4	11	4	1.431	0.953219	1	1	1	1	Not Found	Not Found	1	1	1	1	1	1	1	1	1	1	1	1	Not Found	1	1	1	1	1	1	1	1	1	1	1	1	1	1	1	1	1	1	1	Not Found	Not Found	Not Found
High	F1P6Q0	G protein subunit alpha i3 OS=Canis lupus familiaris OX=9615 GN=GNAI3 PE=4 SV=2	C_familiaris	8	99	2	1.483	0.953219	1	1	1	1	Not Found	Not Found	Not Found	1	1	1	1	1	1	1	1	1	1	1	1	1	1	1	1	1	1	1	1	1	Not Found	1	1	1	1	Not Found	1	1	1	1	Not Found	Not Found	1
High	F1PCR0	Microsomal glutathione S-transferase 3 OS=Canis lupus familiaris OX=9615 GN=MGST3 PE=4 SV=2	C_familiaris	2	19	2	2.292	0.933819	1	1	1	1	1	1	1	Not Found	1	1	Not Found	1	1	1	1	1	1	1	1	1	1	1	1	1	1	Not Found	Not Found	1	1	1	1	1	Not Found	Not Found	Not Found	1	1	Not Found	1	1	Not Found
High	F1PLM7	Transmembrane protein 106B OS=Canis lupus familiaris OX=9615 GN=TMEM106B PE=4 SV=3	C_familiaris	3	13	3	0.578	0.933819	Not Found	Not Found	Not Found	Not Found	Not Found	Not Found	Not Found	1	1	1	1	1	1	1	1	1	1	1	1	1	1	1	1	1	1	1	1	1	1	1	1	1	1	1	1	Not Found	Not Found	1	1	1	Not Found
High	A0A5F4C3I4	ABI family member 3 binding protein OS=Canis lupus familiaris OX=9615 GN=ABI3BP PE=4 SV=1	C_familiaris	2	3	2	0.676	0.952461	Not Found	1	Not Found	Not Found	1	1	1	1	1	Not Found	1	Not Found	Not Found	1	Not Found	1	1	1	1	1	Not Found	Not Found	1	Not Found	Not Found	1	1	1	Not Found	1	1	1	1	1	1	1	1	1	Not Found	1	Not Found
High	A0M8V0	F-actin-capping protein subunit alpha-2 OS=Canis lupus familiaris OX=9615 GN=CAPZA2 PE=3 SV=1	C_familiaris	4	34	2	0.602	0.952597	Not Found	1	1	Not Found	Not Found	Not Found	Not Found	1	1	1	1	1	Not Found	Not Found	1	Not Found	Not Found	Not Found	Not Found	Not Found	Not Found	Not Found	Not Found	Not Found	1	1	1	1	1	1	1	1	1	1	1	1	1	Not Found	1	1	1
High	E2RN45	G3BP stress granule assembly factor 1 OS=Canis lupus familiaris OX=9615 GN=G3BP1 PE=4 SV=2	C_familiaris	2	2	2	0.741	0.953219	Not Found	Not Found	Not Found	Not Found	Not Found	Not Found	Not Found	1	1	Not Found	1	1	1	1	1	1	1	1	1	1	1	1	1	1	Not Found	Not Found	Not Found	1	1	1	1	1	Not Found	Not Found	Not Found	1	1	1	Not Found	Not Found	Not Found
High	J9P922	Cytochrome b reductase 1 OS=Canis lupus familiaris OX=9615 GN=CYBRD1 PE=4 SV=2	C_familiaris	2	10	2	0.737	0.96883	1	1	1	1	1	1	Not Found	1	1	1	1	1	1	1	1	1	1	1	1	1	1	1	1	1	1	1	1	1	1	1	1	1	1	1	1	1	1	1	1	1	1
High	H9GW63	CS domain-containing protein OS=Canis lupus familiaris OX=9615 GN=LOC608096 PE=4 SV=3	C_familiaris	3	7	3	0.588	0.938246	1	1	1	Not Found	1	1	Not Found	Not Found	Not Found	Not Found	1	1	1	1	1	1	1	1	1	1	1	1	1	1	1	1	1	1	1	1	1	1	1	1	1	1	1	1	1	1	1
High	A0A5F4CLV9	SEC31 homolog A, COPII coat complex component OS=Canis lupus familiaris OX=9615 GN=SEC31A PE=4 SV=1	C_familiaris	3	6	3	0.711	0.970978	Not Found	Not Found	1	1	1	Not Found	1	1	1	1	1	1	1	1	1	1	1	1	1	Not Found	1	1	1	Not Found	1	1	1	1	1	1	1	1	1	1	1	1	1	1	1	1	1
High	E2QWG2	F2R like thrombin or trypsin receptor 3 OS=Canis lupus familiaris OX=9615 GN=F2RL3 PE=3 SV=2	C_familiaris	2	4	2	1.377	0.955635	Not Found	Not Found	1	1	Not Found	Not Found	Not Found	1	1	1	1	1	1	1	1	1	1	1	1	1	1	1	1	1	1	1	1	1	1	1	1	1	1	1	1	1	1	1	Not Found	Not Found	1
High	A0A5F4CGH7	Protein phosphatase 2 scaffold subunit Aalpha OS=Canis lupus familiaris OX=9615 GN=PPP2R1A PE=4 SV=1	C_familiaris	3	7	3	1.131	0.986298	Not Found	Not Found	1	1	Not Found	Not Found	Not Found	1	1	1	1	1	1	1	1	1	1	1	Not Found	Not Found	Not Found	1	1	1	1	1	1	1	1	1	1	1	1	1	1	1	1	1	1	1	1
High	A0A5F4BZ45	RAB35, member RAS oncogene family OS=Canis lupus familiaris OX=9615 GN=RAB35 PE=4 SV=1	C_familiaris	4	103	3	0.184	0.391245	1	1	1	1	1	1	1	1	1	1	1	1	1	1	1	Not Found	Not Found	Not Found	Not Found	Not Found	Not Found	1	1	Not Found	1	1	1	1	Not Found	1	1	1	1	1	1	1	1	1	1	Not Found	1
High	F1PWT3	Deoxyribonuclease OS=Canis lupus familiaris OX=9615 GN=DNASE1L1 PE=3 SV=2	C_familiaris	4	10	4	0.526	0.938246	1	Not Found	1	1	Not Found	Not Found	Not Found	1	1	1	1	1	1	1	1	1	1	1	1	Not Found	Not Found	1	1	1	1	1	1	1	1	1	1	1	1	1	1	1	1	1	Not Found	Not Found	1
High	F1Q136	Vesicle associated membrane protein 5 OS=Canis lupus familiaris OX=9615 GN=VAMP5 PE=4 SV=3	C_familiaris	2	4	2	1.038	0.986298	1	1	1	Not Found	Not Found	Not Found	Not Found	1	1	1	1	1	1	1	1	1	1	1	Not Found	Not Found	Not Found	Not Found	1	Not Found	Not Found	1	1	1	1	1	1	1	1	1	1	1	1	1	1	1	1
High	J9P5X6	Exportin 7 OS=Canis lupus familiaris OX=9615 GN=XPO7 PE=4 SV=2	C_familiaris	5	10	5	0.419	0.933819	1	1	1	1	1	1	1	1	1	1	1	1	1	1	1	1	1	1	Not Found	Not Found	Not Found	1	1	1	Not Found	Not Found	Not Found	1	1	1	Not Found	1	1	Not Found	1	1	1	1	Not Found	Not Found	Not Found
High	A0A5F4CQ32	Integrin subunit alpha M OS=Canis lupus familiaris OX=9615 GN=ITGAM PE=4 SV=1	C_familiaris	3	16	2	2.575	0.890127	Not Found	Not Found	1	1	Not Found	Not Found	Not Found	1	1	Not Found	1	Not Found	Not Found	Not Found	Not Found	Not Found	Not Found	Not Found	1	1	1	1	1	1	1	Not Found	1	1	1	1	1	1	1	1	1	1	1	1	Not Found	Not Found	Not Found
High	E2RNT3	DExH-box helicase 9 OS=Canis lupus familiaris OX=9615 GN=DHX9 PE=4 SV=1	C_familiaris	2	3	2	0.8	0.990646	Not Found	Not Found	Not Found	1	Not Found	Not Found	Not Found	1	1	1	1	1	1	1	1	1	1	1	Not Found	Not Found	Not Found	1	1	1	Not Found	Not Found	Not Found	1	1	1	1	Not Found	Not Found	Not Found	Not Found	1	1	1	Not Found	Not Found	Not Found
High	E2R3P7	Ring finger protein 123 OS=Canis lupus familiaris OX=9615 GN=RNF123 PE=4 SV=2	C_familiaris	2	2	2	0.198	0.443159	Not Found	Not Found	Not Found	Not Found	Not Found	Not Found	1	1	1	1	1	1	1	1	1	1	1	1	Not Found	Not Found	Not Found	1	1	1	Not Found	Not Found	Not Found	Not Found	1	Not Found	1	Not Found	Not Found	Not Found	Not Found	Not Found	Not Found	Not Found	Not Found	Not Found	Not Found
High	E2QUL3	Acyl-CoA synthetase long chain family member 1 OS=Canis lupus familiaris OX=9615 GN=ACSL1 PE=4 SV=2	C_familiaris	6	13	6	0.342	0.854371	1	1	1	1	1	1	1	1	1	1	1	1	1	1	1	1	1	1	1	1	1	1	1	1	1	1	1	1	1	1	1	1	1	1	1	1	1	1	1	1	1
High	E2R7A0	Hydroxyacylglutathione hydrolase OS=Canis lupus familiaris OX=9615 GN=HAGH PE=3 SV=2	C_familiaris	5	41	5	0.416	0.933819	1	Not Found	1	1	1	1	1	1	1	1	1	1	1	1	1	1	1	1	1	1	1	1	1	1	1	1	1	1	1	1	1	1	1	1	1	1	1	1	1	1	1
High	F1P6B7	Annexin OS=Canis lupus familiaris OX=9615 GN=ANXA1 PE=3 SV=1	C_familiaris	8	26	8	1.082	0.995619	1	1	1	1	1	1	1	1	1	1	1	1	1	1	1	1	1	1	1	1	1	1	1	1	1	1	1	Not Found	1	Not Found	1	1	1	1	1	1	1	1	1	1	1
High	H9GW57	Uncharacterized protein OS=Canis lupus familiaris OX=9615 GN=LOC475497 PE=3 SV=3	C_familiaris	2	8	2	0.587	0.935358	Not Found	1	1	1	1	1	Not Found	1	1	1	1	1	1	1	1	1	1	1	1	1	1	1	1	1	1	1	1	1	1	1	1	1	1	1	1	1	1	1	Not Found	Not Found	1
High	A0A5F4BXP7	Glycogen phosphorylase B OS=Canis lupus familiaris OX=9615 GN=PYGB PE=4 SV=1	C_familiaris	7	30	4	0.734	0.953219	1	1	1	1	1	1	1	1	1	1	1	1	1	1	1	1	1	1	Not Found	Not Found	1	1	Not Found	1	1	1	1	1	1	1	1	1	1	1	1	1	1	1	1	Not Found	1
High	A0A5F4BYH6	Syntaxin 2 OS=Canis lupus familiaris OX=9615 GN=STX2 PE=4 SV=1	C_familiaris	5	10	5	0.826	0.977355	1	1	1	1	Not Found	1	Not Found	1	1	1	1	1	1	1	1	1	1	1	1	1	1	1	1	1	1	1	1	1	1	1	1	1	1	1	1	1	1	1	1	1	Not Found
High	E2R0L9	T-complex 1 OS=Canis lupus familiaris OX=9615 GN=TCP1 PE=3 SV=1	C_familiaris	3	12	3	0.899	0.991543	1	1	1	1	Not Found	Not Found	1	1	1	1	1	1	1	1	1	1	1	1	Not Found	1	1	1	1	1	1	1	1	1	1	1	1	1	1	Not Found	1	1	1	1	1	1	Not Found
High	E2QUY7	Proteasome 26S subunit, non-ATPase 3 OS=Canis lupus familiaris OX=9615 GN=PSMD3 PE=4 SV=2	C_familiaris	3	15	3	0.334	0.831917	1	1	1	1	Not Found	Not Found	Not Found	1	1	1	1	1	1	1	1	1	1	1	1	1	1	1	1	1	Not Found	1	1	1	1	1	1	1	Not Found	Not Found	1	1	1	1	1	1	1
High	A0A5F4BWD6	Chaperonin containing TCP1 subunit 4 OS=Canis lupus familiaris OX=9615 GN=CCT4 PE=4 SV=1	C_familiaris	3	4	3	0.342	0.854371	1	Not Found	1	1	Not Found	Not Found	Not Found	1	1	1	1	1	1	1	1	1	1	1	Not Found	Not Found	Not Found	1	1	1	Not Found	1	Not Found	Not Found	1	1	1	1	Not Found	Not Found	Not Found	Not Found	1	1	Not Found	Not Found	1
High	J9PAQ4	Ras-related protein Rab-4B OS=Canis lupus familiaris OX=9615 GN=RAB4B PE=4 SV=1	C_familiaris	3	99	2	0.306	0.884543	Not Found	Not Found	1	Not Found	Not Found	1	1	1	1	1	1	Not Found	Not Found	Not Found	1	Not Found	Not Found	Not Found	Not Found	1	Not Found	1	1	1	Not Found	Not Found	Not Found	1	1	Not Found	1	1	Not Found	Not Found	Not Found	Not Found	Not Found	Not Found	1	Not Found	Not Found
High	A0A5F4CW08	Dynamin 2 OS=Canis lupus familiaris OX=9615 GN=DNM2 PE=4 SV=1	C_familiaris	7	20	7	0.705	0.952731	1	1	1	1	1	1	1	1	1	1	1	1	1	1	1	1	1	1	1	1	1	1	1	1	1	1	1	1	1	1	1	1	1	1	1	1	1	1	1	1	1
High	P62822	Ras-related protein Rab-1A OS=Canis lupus familiaris OX=9615 GN=RAB1A PE=1 SV=3	C_familiaris	11	251	4	0.123	0.256031	1	1	1	1	Not Found	Not Found	Not Found	1	1	1	1	1	1	1	1	1	1	1	1	1	1	1	1	1	1	1	1	1	1	1	1	1	1	1	1	1	1	1	1	1	1
High	E2R833	Leucine rich alpha-2-glycoprotein 1 OS=Canis lupus familiaris OX=9615 GN=LRG1 PE=4 SV=3	C_familiaris	4	6	4	0.47	0.933819	1	1	1	1	1	1	Not Found	1	1	1	1	1	1	1	1	1	1	1	1	1	1	1	1	1	1	1	1	1	1	1	1	1	1	1	1	1	1	1	1	Not Found	1
High	A0A5F4CM86	Tetratricopeptide repeat domain 38 OS=Canis lupus familiaris OX=9615 GN=TTC38 PE=4 SV=1	C_familiaris	3	11	3	1.088	0.995619	Not Found	1	1	Not Found	1	1	1	1	1	1	1	1	1	1	1	1	1	1	1	1	Not Found	1	1	1	1	1	1	1	1	1	1	1	1	1	1	1	1	1	1	1	1
High	E2RD70	COP9 signalosome subunit 3 OS=Canis lupus familiaris OX=9615 GN=COPS3 PE=4 SV=1	C_familiaris	3	14	3	0.285	0.825142	1	1	1	1	Not Found	Not Found	1	1	1	1	1	1	1	1	1	1	1	1	1	1	1	1	1	1	Not Found	1	1	1	1	1	1	1	1	1	1	1	1	1	1	Not Found	1
High	J9P6K0	RAP2A, member of RAS oncogene family OS=Canis lupus familiaris OX=9615 GN=RAP2A PE=4 SV=2	C_familiaris	5	11	3	0.834	0.982749	Not Found	1	1	1	Not Found	Not Found	Not Found	1	1	1	1	1	1	1	1	1	1	1	1	1	1	1	1	1	1	1	1	1	1	1	1	1	1	1	1	1	1	1	1	1	1
High	F1PZW8	G protein subunit alpha 13 OS=Canis lupus familiaris OX=9615 GN=GNA13 PE=4 SV=3	C_familiaris	3	7	3	0.792	0.990646	1	1	1	1	1	1	1	1	1	1	1	1	1	1	1	1	1	1	Not Found	1	1	1	1	1	1	1	1	1	1	1	1	1	1	1	1	1	1	1	Not Found	Not Found	1
High	A0A5F4BVL4	Uncharacterized protein OS=Canis lupus familiaris OX=9615 GN=VPS4A PE=4 SV=1	C_familiaris	5	19	2	0.238	0.726666	1	Not Found	Not Found	Not Found	Not Found	Not Found	Not Found	1	1	Not Found	1	1	1	1	1	1	1	1	1	1	1	1	1	1	1	1	1	1	1	1	1	1	1	1	1	1	1	1	1	1	1
High	A0A5F4D881	Sushi domain containing 1 OS=Canis lupus familiaris OX=9615 GN=SUSD1 PE=4 SV=1	C_familiaris	3	4	3	0.665	0.952461	Not Found	Not Found	1	1	1	1	1	1	1	Not Found	1	Not Found	1	1	1	1	1	1	1	1	Not Found	1	1	Not Found	Not Found	1	1	Not Found	1	1	1	1	1	1	1	Not Found	Not Found	1	Not Found	Not Found	1
High	A0A5K1UDZ7	Solute carrier family 12 member 4 OS=Canis lupus familiaris OX=9615 GN=SLC12A4 PE=4 SV=1	C_familiaris	3	3	3	0.337	0.832624	Not Found	Not Found	1	Not Found	1	1	1	1	1	1	1	1	1	1	1	1	1	1	Not Found	Not Found	Not Found	Not Found	Not Found	1	1	1	1	1	1	1	1	1	1	1	1	1	1	1	Not Found	Not Found	Not Found
High	F6Y591	UBX domain protein 6 OS=Canis lupus familiaris OX=9615 GN=UBXN6 PE=4 SV=2	C_familiaris	2	3	2	0.367	0.933819	Not Found	Not Found	Not Found	Not Found	Not Found	Not Found	Not Found	1	1	1	1	1	1	Not Found	1	1	1	Not Found	Not Found	Not Found	Not Found	Not Found	Not Found	Not Found	1	1	1	1	1	1	1	1	1	1	1	1	1	1	1	Not Found	Not Found
High	J9NWA8	Uncharacterized protein OS=Canis lupus familiaris OX=9615 GN=FABP5 PE=4 SV=2	C_familiaris	3	30	3	0.259	0.726666	1	1	1	1	Not Found	1	1	1	1	1	1	1	1	1	1	1	1	1	1	1	1	1	1	1	1	1	1	1	1	1	1	1	1	1	1	1	1	1	1	1	1
High	A0A5F4DAC6	Neuropilin 1 OS=Canis lupus familiaris OX=9615 GN=NRP1 PE=4 SV=1	C_familiaris	6	25	6	0.628	0.944788	1	1	1	1	1	1	Not Found	1	1	1	1	1	1	1	1	1	1	1	1	1	1	1	1	1	1	1	1	1	1	1	1	1	1	1	1	1	1	1	1	1	1
High	F1PRW0	Proteasome 26S subunit, non-ATPase 4 OS=Canis lupus familiaris OX=9615 GN=PSMD4 PE=4 SV=2	C_familiaris	7	38	7	0.35	0.860811	1	1	1	1	Not Found	Not Found	Not Found	1	1	1	1	1	1	1	1	1	1	1	1	1	1	1	1	1	1	1	1	1	1	1	1	1	1	1	1	1	1	1	1	1	1
High	A0A5F4D8G2	NSF attachment protein alpha OS=Canis lupus familiaris OX=9615 GN=NAPA PE=4 SV=1	C_familiaris	3	9	3	0.541	0.935358	1	Not Found	1	1	Not Found	Not Found	Not Found	1	1	1	1	1	1	1	1	1	1	1	1	1	1	1	1	1	1	1	1	1	1	1	1	1	1	1	1	1	1	1	1	1	1
High	A0A5F4BP23	Proteasome 26S subunit, non-ATPase 12 OS=Canis lupus familiaris OX=9615 GN=PSMD12 PE=4 SV=1	C_familiaris	4	14	4	0.133	0.177068	1	1	1	1	Not Found	Not Found	1	1	1	1	1	1	1	1	1	1	1	1	1	1	1	1	1	1	1	1	1	1	1	1	1	1	Not Found	1	Not Found	1	1	1	1	1	Not Found
High	E2RNV4	G protein-coupled receptor class C group 5 member D OS=Canis lupus familiaris OX=9615 GN=GPRC5D PE=4 SV=2	C_familiaris	3	24	3	0.227	0.670749	1	Not Found	Not Found	1	1	Not Found	Not Found	1	1	1	1	1	1	1	1	1	1	1	1	1	1	1	1	1	1	1	1	1	1	1	1	1	1	1	1	1	1	1	1	1	Not Found
High	J9P2T7	Uncharacterized protein OS=Canis lupus familiaris OX=9615 PE=4 SV=1	C_familiaris	10	35	2	0.188	0.536216	1	1	1	1	Not Found	Not Found	Not Found	1	1	1	1	1	1	1	1	1	1	1	1	1	1	1	1	1	1	1	1	1	1	1	1	1	1	1	1	1	1	1	Not Found	Not Found	1
High	F1PK43	Nuclear autoantigenic sperm protein OS=Canis lupus familiaris OX=9615 GN=NASP PE=4 SV=2	C_familiaris	3	6	3	0.532	0.938246	Not Found	Not Found	Not Found	Not Found	Not Found	1	Not Found	1	1	1	1	1	1	1	1	1	1	1	Not Found	1	1	1	1	1	1	1	1	1	1	1	1	1	1	1	1	1	1	1	Not Found	1	1
High	A0A5F4CLB4	Abraxas 2, BRISC complex subunit OS=Canis lupus familiaris OX=9615 GN=ABRAXAS2 PE=4 SV=1	C_familiaris	3	13	3	0.514	0.933819	1	1	Not Found	1	Not Found	1	Not Found	1	1	1	1	1	1	1	1	1	1	1	1	1	1	1	1	1	1	1	1	1	1	1	1	1	Not Found	Not Found	Not Found	Not Found	Not Found	Not Found	1	Not Found	Not Found
High	E2RAM4	Fc fragment of IgE receptor Ig OS=Canis lupus familiaris OX=9615 GN=FCER1G PE=4 SV=1	C_familiaris	2	6	2	0.285	0.796929	Not Found	Not Found	1	1	Not Found	1	Not Found	1	1	1	1	1	Not Found	1	1	Not Found	Not Found	Not Found	Not Found	Not Found	Not Found	1	1	1	1	1	1	1	1	1	1	1	1	1	1	1	1	1	Not Found	Not Found	1
High	J9P740	Thioredoxin like 1 OS=Canis lupus familiaris OX=9615 GN=TXNL1 PE=4 SV=2	C_familiaris	2	2	2	1.341	0.944788	Not Found	Not Found	Not Found	Not Found	Not Found	Not Found	Not Found	1	1	Not Found	1	Not Found	1	1	1	1	1	1	1	Not Found	Not Found	Not Found	Not Found	1	1	1	1	1	1	1	1	1	1	Not Found	1	1	1	1	Not Found	Not Found	1
High	E2R081	Serpin family B member 10 OS=Canis lupus familiaris OX=9615 GN=SERPINB10 PE=3 SV=1	C_familiaris	13	91	13	0.143	0.391245	1	1	1	1	1	1	1	1	1	1	1	1	1	1	1	1	1	1	1	1	1	1	1	1	1	1	1	1	1	1	1	1	1	1	1	1	1	1	1	1	1
High	E2REI7	Nuclear receptor binding protein 1 (Fragment) OS=Canis lupus familiaris OX=9615 GN=NRBP1 PE=4 SV=2	C_familiaris	5	11	5	1.62	0.938246	1	1	1	Not Found	1	1	1	1	1	1	1	1	1	1	1	1	1	1	1	1	1	1	1	1	1	1	1	1	1	1	1	1	1	1	1	1	1	1	1	1	1
High	F1P996	G protein pathway suppressor 1 OS=Canis lupus familiaris OX=9615 GN=GPS1 PE=4 SV=3	C_familiaris	7	46	7	0.67	0.952731	1	1	1	1	Not Found	1	1	1	1	1	1	1	1	1	1	1	1	1	1	1	1	1	1	1	1	1	1	1	1	1	1	1	1	1	1	1	1	1	1	1	1
High	J9P9I7	Elongation factor 1-alpha OS=Canis lupus familiaris OX=9615 PE=3 SV=1	C_familiaris	6	45	4	0.84	0.987033	1	1	1	1	1	Not Found	1	1	1	1	1	1	1	1	1	1	1	1	1	1	1	1	1	1	1	1	1	1	1	1	1	1	1	1	1	1	1	1	1	1	1
High	E2RP98	Carboxylic ester hydrolase OS=Canis lupus familiaris OX=9615 GN=ACHE PE=3 SV=3	C_familiaris	8	24	8	0.311	0.796929	1	1	1	1	1	1	1	1	1	1	1	1	1	1	1	1	1	1	1	1	1	1	1	1	1	1	1	1	1	1	Not Found	1	1	1	1	1	Not Found	1	1	1	1
High	J9NX28	RAS like proto-oncogene A OS=Canis lupus familiaris OX=9615 GN=RALA PE=4 SV=1	C_familiaris	6	47	3	0.391	0.930865	1	1	1	1	Not Found	Not Found	1	1	1	1	1	1	1	1	1	1	1	1	1	1	1	1	1	1	1	1	1	1	1	1	1	1	1	1	1	1	1	1	1	1	1
High	A0A5F4CJG8	Protein kinase C and casein kinase substrate in neurons 2 OS=Canis lupus familiaris OX=9615 GN=PACSIN2 PE=4 SV=1	C_familiaris	6	19	6	0.388	0.910769	Not Found	Not Found	1	1	1	Not Found	Not Found	1	1	1	1	1	1	1	1	1	1	1	1	1	1	1	1	1	1	1	1	1	1	1	1	1	1	1	1	1	1	1	1	1	1
High	F6Y5Z5	EF-hand calcium binding domain 8 OS=Canis lupus familiaris OX=9615 GN=EFCAB8 PE=4 SV=2	C_familiaris	3	5	3	3.48	0.803294	Not Found	1	1	1	Not Found	Not Found	Not Found	1	1	1	1	1	1	1	1	1	1	1	Not Found	Not Found	1	Not Found	1	1	1	1	1	1	1	1	1	1	1	1	1	1	1	1	1	1	1
High	E2RNV3	PITH domain containing 1 OS=Canis lupus familiaris OX=9615 GN=PITHD1 PE=4 SV=3	C_familiaris	3	10	3	6.526	0.419942	Not Found	Not Found	Not Found	Not Found	Not Found	Not Found	Not Found	1	1	1	1	1	1	1	1	1	1	1	1	1	1	1	1	1	1	1	1	1	1	1	1	1	1	1	1	1	1	1	1	1	Not Found
High	E2RBW1	GMP reductase OS=Canis lupus familiaris OX=9615 GN=GMPR2 PE=3 SV=1	C_familiaris	4	9	2	0.293	0.803294	Not Found	1	1	1	Not Found	1	Not Found	1	1	1	1	1	Not Found	Not Found	1	1	1	1	Not Found	Not Found	Not Found	Not Found	Not Found	Not Found	1	1	1	1	1	1	1	1	1	1	1	1	1	1	1	1	1
High	E2RMK6	Eukaryotic translation initiation factor 2 subunit gamma OS=Canis lupus familiaris OX=9615 GN=EIF2S3 PE=4 SV=1	C_familiaris	3	12	3	0.494	0.933819	Not Found	1	Not Found	Not Found	Not Found	Not Found	1	1	1	1	1	1	1	1	1	1	1	1	1	1	1	1	1	1	1	1	1	1	1	1	1	1	Not Found	1	Not Found	1	1	1	Not Found	1	Not Found
High	A0A5F4CCD0	Cysteine rich secretory protein 2 OS=Canis lupus familiaris OX=9615 GN=CRISP2 PE=4 SV=1	C_familiaris	3	27	3	1.214	0.98014	Not Found	1	1	1	Not Found	1	Not Found	Not Found	Not Found	Not Found	Not Found	Not Found	1	1	1	1	1	1	1	1	1	1	1	1	Not Found	Not Found	Not Found	Not Found	1	Not Found	1	1	1	1	1	1	1	1	1	1	1
High	A0A5F4DGX0	Uncharacterized protein OS=Canis lupus familiaris OX=9615 PE=4 SV=1	C_familiaris	3	5	3	1.933	0.933819	1	Not Found	1	1	1	1	1	Not Found	Not Found	Not Found	1	Not Found	1	Not Found	1	1	1	1	Not Found	Not Found	Not Found	1	1	1	1	1	Not Found	Not Found	Not Found	Not Found	Not Found	Not Found	1	1	1	1	1	1	Not Found	Not Found	1
High	F1PUY6	Meprin A subunit OS=Canis lupus familiaris OX=9615 GN=MEP1A PE=4 SV=2	C_familiaris	2	4	2	0.241	0.692859	1	1	Not Found	1	1	1	1	1	1	1	1	1	1	1	1	1	1	1	Not Found	Not Found	Not Found	Not Found	Not Found	Not Found	1	1	1	Not Found	Not Found	Not Found	1	1	Not Found	Not Found	Not Found	1	1	1	Not Found	Not Found	1
High	P27597	T-cell surface glycoprotein CD3 epsilon chain OS=Canis lupus familiaris OX=9615 GN=CD3E PE=2 SV=1	C_familiaris	3	5	3	0.045	0.0163893	1	1	1	1	1	1	1	1	1	1	1	1	1	1	1	1	1	1	1	1	1	1	1	1	1	1	1	1	1	1	1	1	1	1	1	1	1	1	1	1	1
High	A0A5F4CL79	Biotinidase OS=Canis lupus familiaris OX=9615 GN=BTD PE=4 SV=1	C_familiaris	4	10	4	0.626	0.938246	1	1	1	1	1	1	1	1	1	1	1	1	1	1	1	1	1	1	1	1	1	1	1	1	1	1	1	1	1	1	1	1	1	1	1	1	1	1	1	1	1
High	E2R6K5	Histone H3 OS=Canis lupus familiaris OX=9615 GN=GALK1 PE=3 SV=1	C_familiaris	2	23	2	1.019	0.997778	1	1	1	1	1	1	1	1	1	1	1	1	1	1	1	1	1	1	1	1	1	1	1	1	1	1	1	1	1	1	1	1	1	1	1	1	1	1	1	1	1
High	F1P9H3	Ectonucleotide pyrophosphatase/phosphodiesterase 4 OS=Canis lupus familiaris OX=9615 GN=ENPP4 PE=4 SV=2	C_familiaris	6	16	6	0.09	0.154037	Not Found	1	1	1	1	Not Found	Not Found	1	1	1	1	1	1	1	1	1	1	1	1	1	1	1	1	1	1	1	1	1	1	1	1	1	1	1	1	1	1	1	1	1	1
High	F1PQV4	Olfactomedin like 3 OS=Canis lupus familiaris OX=9615 GN=OLFML3 PE=4 SV=2	C_familiaris	5	22	5	0.33	0.830195	1	1	1	1	1	1	1	1	1	1	1	Not Found	1	1	1	1	1	1	1	1	1	1	1	1	1	1	1	1	1	1	1	1	Not Found	1	1	1	1	1	1	Not Found	1
High	F6Y6B4	SH3 domain binding glutamate rich protein like 2 OS=Canis lupus familiaris OX=9615 GN=SH3BGRL2 PE=4 SV=2	C_familiaris	3	17	3	0.837	0.974271	1	1	1	1	Not Found	Not Found	Not Found	1	1	1	1	1	1	1	1	1	1	1	1	1	1	1	1	1	1	1	1	1	1	1	1	1	1	1	1	1	1	1	1	1	1
High	F1P9A7	Protein tweety homolog OS=Canis lupus familiaris OX=9615 GN=TTYH3 PE=3 SV=3	C_familiaris	2	6	2	0.493	0.938246	1	Not Found	1	1	Not Found	1	Not Found	1	1	Not Found	1	1	1	1	1	1	1	1	1	1	1	1	Not Found	Not Found	1	1	1	1	1	1	1	1	1	1	1	1	1	1	1	1	Not Found
High	E2RQ34	Megakaryocyte and platelet inhibitory receptor G6b OS=Canis lupus familiaris OX=9615 GN=MPIG6B PE=4 SV=2	C_familiaris	2	14	2	1.188	0.986298	Not Found	Not Found	1	1	Not Found	Not Found	Not Found	1	1	Not Found	Not Found	Not Found	1	1	1	1	1	1	1	1	1	1	1	1	1	1	1	1	1	1	1	1	1	1	1	1	1	1	1	1	1
High	E2QV12	Phosphoglucomutase 2 OS=Canis lupus familiaris OX=9615 GN=PGM2 PE=4 SV=1	C_familiaris	5	12	5	0.503	0.933819	1	1	1	1	1	1	1	1	1	1	1	1	1	1	1	1	1	1	1	1	1	1	1	1	1	Not Found	Not Found	1	1	Not Found	1	1	Not Found	1	1	1	1	1	Not Found	1	Not Found
High	E2QUZ2	Tetraspanin OS=Canis lupus familiaris OX=9615 GN=CD53 PE=3 SV=1	C_familiaris	2	5	2	0.485	0.933819	1	1	1	1	Not Found	1	1	1	1	Not Found	1	1	1	Not Found	1	1	1	1	1	1	1	Not Found	Not Found	Not Found	1	1	1	1	1	1	1	1	1	1	1	1	1	1	1	1	Not Found
High	F6XIK8	Synaptotagmin binding cytoplasmic RNA interacting protein OS=Canis lupus familiaris OX=9615 GN=SYNCRIP PE=4 SV=1	C_familiaris	2	2	2	0.54	0.938246	1	1	1	1	1	1	1	1	1	1	Not Found	1	1	1	1	1	1	1	Not Found	Not Found	Not Found	1	1	1	1	1	Not Found	1	1	1	Not Found	1	1	1	1	Not Found	1	Not Found	Not Found	Not Found	Not Found
High	F1P9A3	Ferrochelatase OS=Canis lupus familiaris OX=9615 GN=FECH PE=3 SV=2	C_familiaris	2	4	2	0.676	0.952461	1	1	Not Found	1	Not Found	Not Found	Not Found	1	1	Not Found	Not Found	Not Found	1	1	1	1	1	1	Not Found	Not Found	Not Found	1	1	1	1	1	1	Not Found	1	1	Not Found	1	Not Found	Not Found	Not Found	1	1	Not Found	1	1	1
High	E2RRD4	Thioredoxin domain-containing protein OS=Canis lupus familiaris OX=9615 GN=PRDX3 PE=4 SV=2	C_familiaris	2	2	2	0.541	0.944788	1	1	1	Not Found	Not Found	Not Found	Not Found	1	1	1	1	1	1	1	1	1	1	1	Not Found	Not Found	Not Found	1	1	1	1	1	Not Found	Not Found	1	1	1	1	Not Found	Not Found	Not Found	1	1	1	Not Found	Not Found	Not Found
High	E2RQI7	NGG1 interacting factor 3 like 1 OS=Canis lupus familiaris OX=9615 GN=NIF3L1 PE=4 SV=3	C_familiaris	3	5	3	0.348	0.832624	Not Found	Not Found	1	1	Not Found	Not Found	Not Found	1	1	1	1	1	1	1	1	1	1	1	Not Found	1	1	1	1	1	Not Found	Not Found	1	Not Found	Not Found	Not Found	Not Found	Not Found	Not Found	1	Not Found	Not Found	Not Found	Not Found	Not Found	Not Found	1
High	A0A5F4C665	SH3 domain containing GRB2 like, endophilin B2 OS=Canis lupus familiaris OX=9615 GN=SH3GLB2 PE=4 SV=1	C_familiaris	2	3	2	0.951	0.986298	Not Found	Not Found	Not Found	Not Found	Not Found	Not Found	Not Found	1	1	1	1	Not Found	1	Not Found	1	1	1	1	Not Found	Not Found	Not Found	Not Found	Not Found	Not Found	Not Found	Not Found	Not Found	1	Not Found	Not Found	1	1	Not Found	1	Not Found	1	1	Not Found	Not Found	Not Found	1
High	A7VLI5	Glycophorin C OS=Canis lupus familiaris OX=9615 GN=Gypc PE=2 SV=1	C_familiaris	3	202	3	0.036	0.00778436	1	1	1	1	1	1	1	1	1	1	1	1	1	1	1	1	1	1	1	1	1	1	1	1	1	1	1	1	1	1	1	1	1	1	1	1	1	1	1	1	1
High	F6XH46	Glutathione peroxidase OS=Canis lupus familiaris OX=9615 GN=GPX1 PE=3 SV=2	C_familiaris	8	32	8	0.185	0.43692	1	1	1	1	1	1	1	1	1	1	1	1	1	1	1	1	1	1	1	1	1	1	1	1	1	1	1	1	1	1	1	1	1	1	1	1	1	1	1	1	1
High	F1PXZ9	KRAS proto-oncogene, GTPase OS=Canis lupus familiaris OX=9615 GN=KRAS PE=4 SV=2	C_familiaris	6	67	6	0.187	0.550094	1	1	1	1	1	1	1	1	1	1	1	1	1	1	1	1	1	1	1	1	1	1	1	1	1	1	1	1	1	1	1	1	1	1	1	1	1	1	1	1	1
High	A0A5F4CYJ6	Aldehyde dehydrogenase 16 family member A1 OS=Canis lupus familiaris OX=9615 GN=ALDH16A1 PE=4 SV=1	C_familiaris	4	15	4	0.612	0.938246	1	1	1	1	1	1	Not Found	1	1	1	1	1	1	1	1	1	1	1	1	1	1	1	1	1	1	1	1	1	1	1	1	1	1	1	1	1	1	1	1	1	1
High	E2RB90	Heterogeneous nuclear ribonucleoprotein F OS=Canis lupus familiaris OX=9615 GN=HNRNPF PE=4 SV=1	C_familiaris	7	21	7	0.258	0.796189	1	1	1	1	Not Found	Not Found	1	1	1	1	1	1	1	1	1	1	1	1	1	1	1	1	1	1	1	1	1	1	1	1	1	1	1	1	1	1	1	1	1	1	1
High	A0A5F4BP62	Argonaute RISC catalytic component 2 OS=Canis lupus familiaris OX=9615 GN=AGO2 PE=4 SV=1	C_familiaris	6	22	6	0.833	0.986818	1	Not Found	1	1	Not Found	1	1	1	1	1	1	1	1	1	1	1	1	1	Not Found	1	1	1	1	1	1	1	1	1	1	1	1	1	1	1	1	1	1	1	Not Found	1	Not Found
High	E2QSB5	Ephrin B1 OS=Canis lupus familiaris OX=9615 GN=EFNB1 PE=3 SV=1	C_familiaris	3	7	3	0.275	0.710816	Not Found	Not Found	Not Found	Not Found	Not Found	Not Found	Not Found	1	1	1	1	1	1	1	1	1	1	1	1	1	Not Found	Not Found	Not Found	1	1	1	1	1	1	1	1	1	1	1	1	1	1	1	Not Found	1	1
High	A0A5F4BRK1	Prostaglandin G/H synthase 1 OS=Canis lupus familiaris OX=9615 GN=PTGS1 PE=4 SV=1	C_familiaris	3	6	3	1.639	0.938246	1	1	1	1	1	1	Not Found	1	1	Not Found	1	Not Found	1	1	1	1	1	1	1	1	1	Not Found	Not Found	Not Found	Not Found	Not Found	Not Found	1	1	1	1	1	1	1	1	1	1	1	1	1	Not Found
High	P02727	Glycophorin-A OS=Canis lupus familiaris OX=9615 GN=GYPA PE=1 SV=3	C_familiaris	2	51	2	0.027	0.00235664	1	1	1	1	1	1	1	1	1	1	1	1	1	1	1	1	1	1	1	1	1	1	1	1	1	1	1	1	1	1	1	1	1	1	1	1	1	1	1	1	1
High	E2RE13	ADP ribosylation factor like GTPase 8B OS=Canis lupus familiaris OX=9615 GN=ARL8B PE=3 SV=1	C_familiaris	4	12	4	0.355	0.894608	1	1	1	1	1	1	1	1	1	1	1	1	1	1	1	1	1	1	1	1	1	1	1	1	1	1	1	1	1	1	1	1	1	1	1	1	1	1	1	1	1
High	A0A5F4D804	Voltage dependent anion channel 2 OS=Canis lupus familiaris OX=9615 GN=VDAC2 PE=4 SV=1	C_familiaris	3	20	3	1.401	0.956644	1	1	1	1	1	1	1	1	1	1	1	1	1	1	1	1	1	1	1	1	1	1	1	1	1	1	1	1	1	1	1	1	1	1	1	1	1	1	1	1	1
High	J9P4X0	Nucleosome assembly protein 1 like 4 OS=Canis lupus familiaris OX=9615 GN=NAP1L4 PE=3 SV=2	C_familiaris	4	36	3	0.168	0.339668	1	1	1	1	Not Found	1	1	1	1	1	1	1	1	1	1	1	1	1	1	1	1	1	1	1	1	1	1	1	1	1	1	1	1	1	1	1	1	1	1	1	1
High	F2Z4P9	Ras-related protein Rab-10 OS=Canis lupus familiaris OX=9615 GN=RAB10 PE=4 SV=1	C_familiaris	5	187	3	0.23	0.673953	1	1	1	1	1	1	1	1	1	1	1	1	1	1	1	1	1	1	1	Not Found	1	1	1	1	1	1	1	1	1	1	1	1	1	1	1	1	1	1	1	1	1
High	E2R0K4	RAB14, member RAS oncogene family OS=Canis lupus familiaris OX=9615 GN=RAB14 PE=4 SV=1	C_familiaris	8	136	7	0.377	0.919258	1	1	1	1	1	1	Not Found	1	1	1	1	1	1	1	1	1	1	1	1	1	1	1	1	1	1	1	1	1	1	1	1	1	1	1	1	1	1	1	1	1	1
High	E2QWP1	BRO1 domain and CAAX motif containing OS=Canis lupus familiaris OX=9615 GN=BROX PE=4 SV=1	C_familiaris	4	17	4	0.236	0.670841	1	1	1	1	1	1	1	1	1	1	1	1	1	1	1	1	1	1	1	1	1	1	1	1	1	1	1	1	1	1	1	1	1	1	1	1	1	1	1	1	Not Found
High	F1PQD3	Tubulin tyrosine ligase like 12 OS=Canis lupus familiaris OX=9615 GN=TTLL12 PE=4 SV=3	C_familiaris	10	23	10	0.391	0.933819	1	Not Found	1	1	1	1	1	1	1	1	1	1	1	1	1	1	1	1	1	1	1	1	1	1	1	1	1	1	1	1	1	1	1	1	1	1	1	1	1	1	1
High	P61007	Ras-related protein Rab-8A OS=Canis lupus familiaris OX=9615 GN=RAB8A PE=1 SV=1	C_familiaris	7	230	4	0.151	0.423226	1	1	1	1	Not Found	Not Found	Not Found	1	1	1	1	1	1	1	1	1	1	1	1	1	1	1	1	1	1	1	1	1	1	1	1	1	1	1	1	1	1	1	1	1	1
High	J9NY67	Uncharacterized protein OS=Canis lupus familiaris OX=9615 PE=3 SV=1	C_familiaris	5	31	5	0.433	0.930337	Not Found	1	1	1	Not Found	Not Found	1	1	1	1	1	1	1	1	1	1	1	1	1	1	1	1	1	1	1	1	1	1	1	1	1	1	1	1	1	1	1	1	1	1	1
High	J9NWC3	MYC target 1 OS=Canis lupus familiaris OX=9615 GN=MYCT1 PE=4 SV=2	C_familiaris	4	16	4	1.099	0.995619	Not Found	1	1	1	1	Not Found	Not Found	1	1	1	1	1	1	1	1	1	1	1	1	1	1	1	1	1	1	1	1	1	1	1	1	1	1	1	1	1	1	1	1	1	1
High	A0A5F4CGL6	G protein-coupled receptor kinase 6 OS=Canis lupus familiaris OX=9615 GN=GRK6 PE=4 SV=1	C_familiaris	4	10	4	0.503	0.935358	1	1	1	1	Not Found	Not Found	Not Found	1	1	1	1	1	1	1	1	1	1	1	1	1	1	1	1	1	1	1	1	1	1	1	1	1	1	1	1	1	1	1	1	1	1
High	F1PKU7	Protein kinase C OS=Canis lupus familiaris OX=9615 GN=PRKCB PE=3 SV=3	C_familiaris	3	6	2	1.334	0.953219	Not Found	Not Found	1	1	Not Found	Not Found	Not Found	1	1	1	1	1	1	1	1	1	1	1	1	1	1	1	1	1	1	1	1	1	1	1	1	1	1	1	1	1	1	1	Not Found	1	1
High	F6XRY2	Eukaryotic translation elongation factor 2 OS=Canis lupus familiaris OX=9615 GN=EEF2 PE=4 SV=1	C_familiaris	6	17	6	0.412	0.890127	1	1	1	1	1	1	1	1	1	1	1	1	1	1	1	1	1	1	1	1	1	1	1	1	1	1	1	1	1	1	1	1	1	1	1	1	1	1	1	1	Not Found
High	J9P7Y9	Uncharacterized protein OS=Canis lupus familiaris OX=9615 PE=4 SV=2	C_familiaris	10	77	7	0.539	0.938246	1	1	1	1	1	1	Not Found	1	1	1	1	1	1	1	1	1	1	1	1	1	1	1	1	1	1	1	1	1	1	1	1	1	1	1	1	1	1	1	1	1	1
High	A0A5F4CT48	Integrin subunit alpha M OS=Canis lupus familiaris OX=9615 GN=ITGAM PE=4 SV=1	C_familiaris	10	25	9	0.632	0.952461	1	1	1	1	1	1	1	1	1	1	1	1	1	1	1	1	1	1	1	1	Not Found	1	1	1	1	1	1	1	1	1	1	1	1	1	1	1	1	1	1	1	1
High	F1PQS8	CKLF like MARVEL transmembrane domain containing 6 OS=Canis lupus familiaris OX=9615 GN=CMTM6 PE=4 SV=2	C_familiaris	3	13	3	0.961	0.995619	1	1	1	1	1	Not Found	1	1	1	1	1	1	1	1	1	1	1	1	1	1	1	1	1	1	1	1	1	1	1	1	1	1	1	1	1	1	1	1	1	1	1
High	E2RPA8	Tetraspanin OS=Canis lupus familiaris OX=9615 GN=CD151 PE=3 SV=3	C_familiaris	3	96	3	0.975	0.997778	1	1	1	1	1	1	1	1	1	1	1	1	1	1	1	1	1	1	1	1	1	1	1	Not Found	1	1	1	1	1	1	1	1	1	1	1	1	1	1	1	1	1
High	J9P3T9	RAN binding protein 1 OS=Canis lupus familiaris OX=9615 GN=RANBP1 PE=4 SV=2	C_familiaris	5	38	5	0.582	0.944788	1	1	1	1	1	Not Found	Not Found	1	1	1	1	1	1	1	1	1	1	1	1	1	1	1	1	1	1	1	1	1	1	1	1	1	1	1	1	1	1	1	1	1	1
High	E2RC20	Nucleoside diphosphate kinase OS=Canis lupus familiaris OX=9615 GN=NME2 PE=3 SV=3	C_familiaris	5	79	3	0.104	0.187031	Not Found	Not Found	1	1	1	Not Found	1	1	1	1	1	1	1	1	1	1	1	1	1	1	1	1	1	1	1	1	1	1	1	1	1	1	1	1	1	1	1	1	1	1	1
High	E2RFK4	CD177 molecule OS=Canis lupus familiaris OX=9615 GN=CD177 PE=4 SV=2	C_familiaris	2	14	2	1.757	0.940442	1	1	1	1	1	1	Not Found	1	1	1	Not Found	Not Found	1	1	1	1	1	1	1	1	1	1	1	1	1	1	1	1	1	1	1	1	1	1	1	1	1	1	1	1	1
High	J9P8J3	Heterogeneous nuclear ribonucleoprotein K OS=Canis lupus familiaris OX=9615 GN=HNRNPK PE=4 SV=2	C_familiaris	4	17	4	0.646	0.938246	Not Found	Not Found	Not Found	1	Not Found	Not Found	Not Found	1	1	1	1	1	1	1	1	1	1	1	1	1	1	1	1	1	1	1	1	1	1	1	1	1	1	1	1	1	1	1	1	1	1
High	A0A5F4CCP6	ANTXR cell adhesion molecule 1 OS=Canis lupus familiaris OX=9615 GN=ANTXR1 PE=4 SV=1	C_familiaris	3	5	3	1.711	0.940442	1	1	Not Found	1	1	1	1	1	1	Not Found	1	1	Not Found	1	Not Found	1	1	Not Found	1	1	1	1	Not Found	Not Found	1	1	1	1	1	1	1	1	1	1	1	1	1	1	1	1	Not Found
High	A0A5F4D4V2	Sidekick cell adhesion molecule 1 OS=Canis lupus familiaris OX=9615 GN=SDK1 PE=4 SV=1	C_familiaris	3	5	3	1.962	0.933819	Not Found	Not Found	Not Found	1	1	1	1	1	1	1	1	Not Found	1	1	1	1	1	1	1	Not Found	1	1	1	1	Not Found	Not Found	Not Found	1	1	1	1	1	1	1	1	1	Not Found	1	Not Found	Not Found	1
High	A0A5F4DCE0	Tropomyosin 1 OS=Canis lupus familiaris OX=9615 GN=TPM1 PE=4 SV=1	C_familiaris	13	231	3	0.492	0.933819	1	1	1	1	1	1	1	1	1	1	1	1	1	1	1	1	1	1	1	1	1	1	1	1	1	1	1	1	1	1	1	1	1	1	1	1	1	1	1	1	1
High	E2RGK2	Adenylosuccinate lyase OS=Canis lupus familiaris OX=9615 GN=TNRC6B PE=3 SV=2	C_familiaris	5	15	5	0.358	0.884543	1	1	1	1	Not Found	1	1	1	1	1	1	1	1	1	1	1	1	1	1	1	1	1	1	1	1	1	1	1	1	1	1	1	1	1	1	1	1	1	1	1	1
High	F1PG69	Collagen type III alpha 1 chain OS=Canis lupus familiaris OX=9615 GN=COL3A1 PE=4 SV=3	C_familiaris	5	13	3	1.084	0.995619	1	1	1	1	1	Not Found	1	1	1	1	1	1	1	1	1	1	1	1	1	1	1	1	1	1	1	1	1	1	1	1	1	1	1	1	1	1	1	1	1	1	1
High	E2RLL6	Chaperonin containing TCP1 subunit 6A OS=Canis lupus familiaris OX=9615 GN=CCT6A PE=3 SV=3	C_familiaris	10	25	5	0.252	0.776704	1	1	1	1	Not Found	Not Found	1	1	1	1	1	1	1	1	1	1	1	1	1	1	1	1	1	1	1	1	1	1	1	1	1	1	1	1	1	1	1	1	1	1	1
High	F1PD37	Serine/threonine-protein phosphatase 2A activator OS=Canis lupus familiaris OX=9615 GN=PTPA PE=3 SV=3	C_familiaris	4	10	4	0.775	0.953219	1	Not Found	1	1	1	1	Not Found	1	1	1	1	1	1	1	1	1	1	1	1	1	1	1	1	1	1	1	1	1	1	1	1	1	1	1	1	1	1	1	1	1	1
High	A0A5F4CWT6	Arrestin beta 1 OS=Canis lupus familiaris OX=9615 GN=ARRB1 PE=4 SV=1	C_familiaris	4	14	4	1.268	0.971475	1	Not Found	1	1	1	1	1	1	1	1	1	1	1	1	1	1	1	1	1	1	1	1	1	1	1	1	1	1	1	1	1	1	1	1	Not Found	1	1	1	1	1	1
High	A0A5F4BQK3	Lysosomal associated membrane protein 2 OS=Canis lupus familiaris OX=9615 GN=LAMP2 PE=4 SV=1	C_familiaris	4	13	4	0.53	0.933819	1	1	1	1	1	Not Found	1	1	1	1	1	1	1	1	1	1	1	1	1	1	1	1	1	1	1	1	1	1	1	1	1	1	1	1	1	1	1	1	1	1	1
High	H9GW87	Transaldolase OS=Canis lupus familiaris OX=9615 GN=LOC475937 PE=3 SV=1	C_familiaris	5	19	5	0.554	0.937597	1	Not Found	1	1	Not Found	Not Found	1	1	1	1	1	1	1	1	1	1	1	1	1	1	1	1	1	1	1	1	1	1	1	1	1	1	1	1	1	1	1	1	1	1	1
High	F1PX57	26S proteasome non-ATPase regulatory subunit 1 OS=Canis lupus familiaris OX=9615 GN=PSMD1 PE=3 SV=3	C_familiaris	6	12	6	0.383	0.917091	1	1	1	1	1	1	1	1	1	1	1	1	1	1	1	1	1	1	1	1	1	1	1	1	Not Found	1	Not Found	1	1	1	1	1	1	1	1	1	1	1	Not Found	1	1
High	E2RJH1	Rac family small GTPase 2 OS=Canis lupus familiaris OX=9615 GN=RAC2 PE=4 SV=2	C_familiaris	5	66	2	0.531	0.933889	1	1	1	1	1	Not Found	Not Found	1	1	1	1	1	1	1	1	1	1	1	1	1	1	1	1	1	1	1	1	1	1	1	1	1	1	1	1	1	1	1	1	1	Not Found
High	E2R0W5	Uncharacterized protein OS=Canis lupus familiaris OX=9615 GN=CR2 PE=4 SV=3	C_familiaris	6	11	6	0.848	0.974329	1	1	1	1	1	1	1	1	1	1	1	1	1	Not Found	1	Not Found	Not Found	1	1	1	1	1	1	1	1	1	1	1	1	1	1	1	1	1	1	1	Not Found	1	1	1	1
High	F1PSK6	EH domain containing 1 OS=Canis lupus familiaris OX=9615 GN=EHD1 PE=3 SV=3	C_familiaris	18	182	6	0.51	0.933819	1	1	1	1	1	1	1	1	1	1	1	1	1	1	1	1	1	1	1	1	1	1	1	1	1	1	1	1	1	1	1	1	1	1	1	1	1	1	Not Found	Not Found	1
High	F1PN96	DnaJ heat shock protein family (Hsp40) member B2 OS=Canis lupus familiaris OX=9615 GN=DNAJB2 PE=4 SV=3	C_familiaris	2	4	2	1.565	0.944788	1	Not Found	Not Found	1	Not Found	Not Found	1	1	1	1	1	1	1	1	1	1	1	1	1	1	1	1	1	1	1	1	1	1	1	1	1	1	1	Not Found	1	Not Found	1	1	1	Not Found	Not Found
High	A0A5F4DHC3	CD37 molecule OS=Canis lupus familiaris OX=9615 GN=CD37 PE=4 SV=1	C_familiaris	2	2	2	0.457	0.933819	1	1	1	1	1	Not Found	1	1	1	1	1	Not Found	1	Not Found	Not Found	1	1	1	1	Not Found	Not Found	Not Found	Not Found	Not Found	1	1	1	1	1	1	1	1	1	1	1	1	1	1	1	1	Not Found
High	A0A5F4DKA2	Hemoglobin subunit mu OS=Canis lupus familiaris OX=9615 GN=HBM PE=4 SV=1	C_familiaris	3	14	3	1.025	0.997778	Not Found	Not Found	Not Found	Not Found	1	1	1	1	1	1	1	1	1	1	1	Not Found	1	1	Not Found	Not Found	Not Found	Not Found	Not Found	Not Found	1	1	1	1	1	1	1	1	1	1	1	1	1	1	1	1	1
High	A0A5F4D567	Uncharacterized protein OS=Canis lupus familiaris OX=9615 PE=4 SV=1	C_familiaris	9	208	2	0.01	1.65492e-16	Not Found	Not Found	Not Found	Not Found	Not Found	Not Found	1	1	1	Not Found	Not Found	Not Found	Not Found	Not Found	Not Found	Not Found	Not Found	Not Found	Not Found	Not Found	Not Found	Not Found	Not Found	Not Found	1	1	1	Not Found	Not Found	1	Not Found	Not Found	Not Found	Not Found	Not Found	1	Not Found	Not Found	Not Found	Not Found	1
High	P63091	Guanine nucleotide-binding protein G(s) subunit alpha OS=Canis lupus familiaris OX=9615 GN=GNAS PE=2 SV=1	C_familiaris	9	94	8	0.185	0.542196	1	1	1	1	1	1	1	1	1	1	1	1	1	1	1	1	1	1	1	1	1	1	1	1	1	1	1	1	1	1	1	1	1	1	1	1	1	1	1	1	1
High	A0A140T8E6	Uncharacterized protein OS=Canis lupus familiaris OX=9615 GN=JUP PE=4 SV=1	C_familiaris	7	20	7	0.21	0.642421	1	1	1	1	1	1	1	1	1	1	1	1	1	1	1	1	1	1	1	1	1	1	1	1	1	1	1	1	1	1	1	1	1	1	1	1	1	1	1	1	1
High	J9P9E9	Glucose-6-phosphate 1-dehydrogenase OS=Canis lupus familiaris OX=9615 GN=G6PD PE=3 SV=2	C_familiaris	8	29	8	0.45	0.933819	1	1	1	1	1	1	1	1	1	1	1	1	1	1	1	1	1	1	1	1	1	1	1	1	1	1	1	1	1	1	1	1	1	1	1	1	1	1	1	1	1
High	E2R1N1	YOD1 deubiquitinase OS=Canis lupus familiaris OX=9615 GN=YOD1 PE=4 SV=1	C_familiaris	8	65	8	0.885	0.989534	1	1	1	1	1	1	1	1	1	1	1	1	1	1	1	1	1	1	1	1	1	1	1	1	1	1	1	1	1	1	1	1	1	1	1	1	1	1	1	1	1
High	J9P988	CD38 molecule OS=Canis lupus familiaris OX=9615 GN=CD38 PE=4 SV=2	C_familiaris	5	17	5	0.861	0.986298	1	1	1	1	1	1	1	1	1	1	1	1	1	1	1	1	1	1	1	1	1	1	1	1	1	1	1	1	1	1	1	1	1	1	1	1	1	1	Not Found	1	1
High	A0A5F4C8H4	Archain 1 OS=Canis lupus familiaris OX=9615 GN=ARCN1 PE=4 SV=1	C_familiaris	2	10	2	0.146	0.359065	1	1	1	1	Not Found	Not Found	Not Found	1	1	1	1	1	1	1	1	1	1	1	1	1	1	1	1	1	1	1	1	1	1	1	1	1	1	1	1	1	1	1	1	1	1
High	E2RLB2	RAS like proto-oncogene B OS=Canis lupus familiaris OX=9615 GN=RALB PE=4 SV=1	C_familiaris	5	39	2	0.422	0.933819	1	1	1	1	Not Found	Not Found	Not Found	1	1	1	1	1	1	1	1	1	1	1	1	1	1	1	1	1	1	1	1	1	1	1	1	1	1	1	1	1	1	1	1	1	1
High	F1PZA1	Isocitrate dehydrogenase [NADP] OS=Canis lupus familiaris OX=9615 GN=IDH1 PE=2 SV=1	C_familiaris	3	30	3	2.071	0.933819	1	Not Found	1	1	1	1	1	1	1	1	1	1	1	1	1	1	1	1	1	1	1	1	1	1	1	1	1	1	1	1	Not Found	1	1	1	1	Not Found	1	Not Found	1	1	1
High	A0A5F4D3P9	Uncharacterized protein OS=Canis lupus familiaris OX=9615 GN=HNRNPC PE=4 SV=1	C_familiaris	3	6	3	1.626	0.944788	Not Found	Not Found	1	Not Found	Not Found	1	Not Found	1	1	1	1	1	1	1	1	1	1	1	1	1	1	1	1	1	1	1	1	1	1	1	1	1	1	1	1	1	1	1	Not Found	1	1
High	A0A5F4C4Q1	Beta-2-microglobulin OS=Canis lupus familiaris OX=9615 GN=B2M PE=4 SV=1	C_familiaris	2	18	2	0.957	0.995619	1	1	1	1	Not Found	Not Found	Not Found	1	Not Found	Not Found	1	Not Found	1	1	1	1	1	1	1	1	1	1	1	1	1	1	1	1	1	1	1	1	1	1	Not Found	1	1	1	1	1	1
High	F6UXI8	Inosine-5'-monophosphate dehydrogenase OS=Canis lupus familiaris OX=9615 GN=IMPDH2 PE=3 SV=2	C_familiaris	5	21	5	1.008	0.997778	1	1	Not Found	Not Found	1	1	1	1	Not Found	1	1	1	Not Found	Not Found	Not Found	1	1	1	Not Found	Not Found	Not Found	Not Found	1	1	1	1	1	1	1	1	1	1	1	1	1	1	1	1	Not Found	Not Found	1
High	E2RPP4	CDC42 binding protein kinase beta OS=Canis lupus familiaris OX=9615 GN=CDC42BPB PE=3 SV=3	C_familiaris	2	5	2	0.596	0.938246	Not Found	1	1	Not Found	Not Found	Not Found	Not Found	1	1	1	1	1	1	1	1	1	1	1	1	1	1	1	1	1	Not Found	Not Found	Not Found	Not Found	Not Found	Not Found	1	1	1	Not Found	1	1	1	1	1	1	1
High	E2RCF9	Uncharacterized protein OS=Canis lupus familiaris OX=9615 GN=PCBP2 PE=4 SV=3	C_familiaris	5	35	2	0.515	0.933819	Not Found	Not Found	Not Found	Not Found	Not Found	Not Found	Not Found	1	1	Not Found	1	1	1	1	1	1	Not Found	Not Found	Not Found	Not Found	Not Found	1	1	1	1	1	1	1	1	1	1	1	1	1	1	1	1	1	1	1	Not Found
High	E2RRC6	Radixin OS=Canis lupus familiaris OX=9615 GN=RDX PE=4 SV=2	C_familiaris	11	176	2	3.103	0.847605	1	1	Not Found	Not Found	Not Found	Not Found	Not Found	1	1	1	1	1	1	Not Found	1	1	1	1	1	1	1	1	1	Not Found	Not Found	1	1	Not Found	Not Found	Not Found	1	Not Found	1	1	1	1	1	1	Not Found	Not Found	1
High	F1PQ45	Integrin subunit alpha 11 OS=Canis lupus familiaris OX=9615 GN=ITGA11 PE=3 SV=3	C_familiaris	4	6	4	0.599	0.952439	1	1	Not Found	Not Found	1	1	1	1	1	Not Found	1	1	Not Found	Not Found	Not Found	Not Found	Not Found	Not Found	Not Found	1	Not Found	Not Found	Not Found	Not Found	1	Not Found	1	1	1	1	1	1	1	1	1	Not Found	Not Found	Not Found	1	1	1
High	F1PGJ5	Scavenger receptor class B member 2 OS=Canis lupus familiaris OX=9615 GN=SCARB2 PE=3 SV=2	C_familiaris	2	3	2	0.407	0.933819	Not Found	Not Found	Not Found	Not Found	Not Found	Not Found	Not Found	1	1	1	Not Found	Not Found	Not Found	Not Found	Not Found	1	1	1	Not Found	Not Found	Not Found	1	1	1	Not Found	Not Found	Not Found	Not Found	Not Found	Not Found	Not Found	Not Found	1	1	1	Not Found	Not Found	Not Found	1	1	Not Found
High	F1PVR0	Matrix metallopeptidase 8 OS=Canis lupus familiaris OX=9615 GN=MMP8 PE=3 SV=2	C_familiaris	2	4	2	0.413	0.933819	1	Not Found	1	1	1	Not Found	Not Found	1	1	1	1	1	Not Found	Not Found	Not Found	Not Found	1	Not Found	Not Found	Not Found	1	Not Found	Not Found	1	Not Found	Not Found	Not Found	Not Found	Not Found	Not Found	Not Found	Not Found	Not Found	Not Found	Not Found	Not Found	Not Found	Not Found	Not Found	Not Found	Not Found
High	A0A5F4DI79	Myosin IC OS=Canis lupus familiaris OX=9615 GN=MYO1C PE=4 SV=1	C_familiaris	9	35	9	0.575	0.938246	1	1	1	1	1	1	1	1	1	1	1	1	1	1	1	1	1	1	1	1	1	1	1	1	1	1	1	1	1	1	1	1	1	1	1	1	1	1	1	1	1
High	F1PHS2	Serpin family A member 11 OS=Canis lupus familiaris OX=9615 GN=SERPINA11 PE=3 SV=2	C_familiaris	4	20	4	0.189	0.518113	1	1	1	Not Found	1	1	1	1	1	1	1	1	1	1	1	1	1	1	1	1	1	1	1	1	1	1	1	1	1	1	1	1	1	1	1	1	1	1	1	1	1
High	J9P7P2	Uncharacterized protein OS=Canis lupus familiaris OX=9615 GN=LOC610164 PE=3 SV=2	C_familiaris	7	29	7	0.47	0.933819	1	1	1	1	1	1	Not Found	1	1	1	1	1	1	1	1	1	1	1	1	1	1	1	1	1	1	1	1	1	1	1	1	1	1	1	1	1	1	1	1	1	1
High	A0A5F4CN31	Glucose-6-phosphate isomerase OS=Canis lupus familiaris OX=9615 GN=GPI PE=4 SV=1	C_familiaris	12	38	12	0.586	0.938246	1	Not Found	1	1	1	1	1	1	1	1	1	1	1	1	1	1	1	1	1	1	1	1	1	1	1	1	1	1	1	1	1	1	1	1	1	1	1	1	1	1	1
High	F1PC59	Peroxiredoxin 6 OS=Canis lupus familiaris OX=9615 GN=PRDX6 PE=4 SV=2	C_familiaris	5	20	5	0.554	0.938246	1	Not Found	1	1	1	1	1	1	1	1	1	1	1	1	1	1	1	1	1	1	1	1	1	1	1	1	1	1	1	1	1	1	1	1	1	1	1	1	1	1	1
High	E2RH48	Proteasome 26S subunit, ATPase 4 OS=Canis lupus familiaris OX=9615 GN=PSMC4 PE=3 SV=1	C_familiaris	7	35	7	1.192	0.973024	1	1	1	1	1	1	1	1	1	1	1	1	1	1	1	1	1	1	1	1	1	1	1	1	1	1	1	1	1	1	1	1	1	1	1	1	1	1	1	1	1
High	E2RN00	Prickle planar cell polarity protein 2 OS=Canis lupus familiaris OX=9615 GN=PRICKLE2 PE=4 SV=2	C_familiaris	5	34	5	0.24	0.663027	1	1	1	1	Not Found	1	Not Found	1	1	1	1	1	1	1	1	1	1	1	1	1	1	1	1	1	1	1	1	1	1	1	1	1	1	1	1	1	1	1	1	1	1
High	F1P6Z3	N-ethylmaleimide sensitive factor, vesicle fusing ATPase OS=Canis lupus familiaris OX=9615 GN=NSF PE=4 SV=2	C_familiaris	6	13	6	0.347	0.880036	1	1	1	1	1	1	1	1	1	1	1	1	1	1	1	1	1	1	Not Found	1	Not Found	1	1	1	1	1	1	1	1	1	1	1	1	1	1	1	1	1	1	1	1
High	P18470	DLA class II histocompatibility antigen, DR-1 beta chain OS=Canis lupus familiaris OX=9615 PE=2 SV=1	C_familiaris	4	24	3	0.608	0.952439	1	1	1	1	1	1	1	1	1	1	1	1	1	1	1	1	1	1	1	1	1	1	Not Found	Not Found	1	1	1	1	1	1	1	1	1	1	1	1	1	1	1	1	1
High	A0A5F4C5J5	Glycoprotein VI platelet OS=Canis lupus familiaris OX=9615 GN=GP6 PE=4 SV=1	C_familiaris	2	5	2	1.134	0.9867	1	1	1	1	Not Found	1	Not Found	1	1	1	1	1	1	1	1	1	1	1	1	1	1	1	1	1	1	1	1	1	1	1	1	1	1	1	1	1	1	1	1	1	1
High	A0A5F4CUP0	Poly(A) binding protein cytoplasmic 1 OS=Canis lupus familiaris OX=9615 GN=PABPC1 PE=4 SV=1	C_familiaris	3	4	3	1.006	0.997778	1	1	Not Found	1	1	Not Found	1	1	1	1	1	1	1	1	1	1	1	1	1	1	1	1	1	1	1	1	1	1	1	1	1	1	1	1	1	1	1	1	Not Found	1	1
High	E2R9R6	Programmed cell death 10 OS=Canis lupus familiaris OX=9615 GN=PDCD10 PE=4 SV=3	C_familiaris	3	12	3	1.684	0.938246	Not Found	Not Found	1	1	Not Found	Not Found	Not Found	1	1	1	1	1	1	1	1	1	1	1	1	1	Not Found	1	1	1	1	1	1	1	1	1	1	1	1	1	1	1	1	1	1	1	1
High	F1PA87	Protein kinase cAMP-activated catalytic subunit beta OS=Canis lupus familiaris OX=9615 GN=PRKACB PE=3 SV=2	C_familiaris	3	5	3	0.11	0.177068	1	1	1	1	Not Found	Not Found	Not Found	1	1	1	1	1	Not Found	Not Found	Not Found	1	1	1	Not Found	Not Found	Not Found	1	Not Found	1	1	1	1	1	1	1	1	1	1	1	1	1	1	1	1	1	1
High	E2RPY6	Cytoplasmic protein OS=Canis lupus familiaris OX=9615 GN=NCK2 PE=4 SV=2	C_familiaris	3	5	3	2.559	0.899167	Not Found	Not Found	1	1	1	1	1	1	1	Not Found	1	1	1	1	1	1	1	1	1	1	1	1	Not Found	1	1	Not Found	Not Found	Not Found	1	Not Found	1	Not Found	1	1	1	Not Found	1	1	1	1	1
High	A0A5F4CXX0	Reticulon 3 OS=Canis lupus familiaris OX=9615 GN=RTN3 PE=4 SV=1	C_familiaris	3	15	3	2.753	0.910769	1	1	1	1	Not Found	Not Found	Not Found	1	1	1	1	1	Not Found	Not Found	Not Found	Not Found	1	Not Found	Not Found	Not Found	Not Found	1	1	1	1	1	1	1	1	1	1	1	1	Not Found	1	1	1	1	Not Found	1	1
High	J9NZQ3	V-type proton ATPase subunit G OS=Canis lupus familiaris OX=9615 PE=3 SV=2	C_familiaris	2	12	2	0.699	0.953219	1	Not Found	1	1	Not Found	Not Found	Not Found	1	1	1	1	1	1	1	1	1	1	1	1	1	1	1	Not Found	1	1	1	1	1	1	1	1	1	Not Found	Not Found	Not Found	Not Found	Not Found	Not Found	Not Found	Not Found	1
High	F1Q4A4	Coagulation factor X OS=Canis lupus familiaris OX=9615 GN=F10 PE=3 SV=3	C_familiaris	5	11	5	1.241	0.96883	1	1	1	1	1	1	1	Not Found	Not Found	Not Found	1	1	1	1	1	Not Found	1	1	Not Found	1	Not Found	1	1	1	Not Found	1	Not Found	1	Not Found	Not Found	Not Found	Not Found	1	1	1	1	1	1	1	1	Not Found
High	A0A0B4J195	Aspartate aminotransferase OS=Canis lupus familiaris OX=9615 GN=GOT1 PE=4 SV=1	C_familiaris	2	4	2	0.535	0.933819	Not Found	Not Found	Not Found	1	Not Found	1	Not Found	1	1	1	1	1	1	1	1	1	1	1	1	1	1	1	1	1	Not Found	Not Found	Not Found	Not Found	Not Found	1	Not Found	Not Found	1	1	1	Not Found	Not Found	Not Found	Not Found	Not Found	1
High	J9NSQ4	Regulator of G protein signaling 10 OS=Canis lupus familiaris OX=9615 GN=RGS10 PE=4 SV=2	C_familiaris	2	3	2	1.111	0.995619	1	Not Found	Not Found	Not Found	1	1	Not Found	1	1	1	1	1	Not Found	Not Found	1	1	Not Found	1	1	1	1	Not Found	1	Not Found	1	Not Found	1	1	1	1	1	1	Not Found	Not Found	Not Found	Not Found	Not Found	Not Found	Not Found	Not Found	Not Found
High	Q6UKZ8	Growth/differentiation factor 8 OS=Canis lupus familiaris OX=9615 GN=MSTN PE=2 SV=1	C_familiaris	4	4	4	0.96	0.995619	1	Not Found	1	1	Not Found	Not Found	Not Found	1	Not Found	Not Found	1	1	Not Found	Not Found	Not Found	Not Found	Not Found	Not Found	1	1	1	Not Found	Not Found	Not Found	1	1	1	Not Found	Not Found	Not Found	Not Found	1	1	1	Not Found	1	1	1	Not Found	Not Found	Not Found
High	F1PLM3	Tubulin alpha chain OS=Canis lupus familiaris OX=9615 PE=3 SV=2	C_familiaris	6	140	2	0.079	0.0730203	1	Not Found	Not Found	Not Found	Not Found	Not Found	Not Found	1	Not Found	Not Found	Not Found	Not Found	Not Found	1	1	1	1	1	Not Found	1	1	Not Found	Not Found	Not Found	Not Found	Not Found	Not Found	Not Found	Not Found	Not Found	Not Found	Not Found	Not Found	Not Found	Not Found	Not Found	Not Found	Not Found	Not Found	1	Not Found
High	A0A5F4BQH7	Chromosome 9 C17orf99 homolog OS=Canis lupus familiaris OX=9615 GN=C9H17orf99 PE=4 SV=1	C_familiaris	6	60	6	0.152	0.384743	1	1	1	1	1	1	1	1	1	1	1	1	1	1	1	1	1	1	1	1	1	1	1	1	1	1	1	1	1	1	1	1	1	1	1	1	1	1	1	1	1
High	A0A5F4C1K4	2',3'-cyclic nucleotide 3' phosphodiesterase OS=Canis lupus familiaris OX=9615 GN=CNP PE=4 SV=1	C_familiaris	13	43	13	0.178	0.534588	1	1	1	1	1	1	1	1	1	1	1	1	1	1	1	1	1	1	1	1	1	1	1	1	1	1	1	1	1	1	1	1	1	1	1	1	1	1	1	1	1
High	E2RT32	Syntaxin 12 OS=Canis lupus familiaris OX=9615 GN=STX12 PE=3 SV=2	C_familiaris	6	17	6	0.459	0.933819	1	1	1	1	1	1	1	1	1	1	1	1	1	1	1	1	1	1	1	1	1	1	1	1	1	1	1	1	1	1	1	1	1	1	1	1	1	1	1	1	1
High	A0A5F4C041	Uncharacterized protein OS=Canis lupus familiaris OX=9615 GN=FOLR2 PE=4 SV=1	C_familiaris	3	28	3	2.243	0.933819	1	1	1	1	1	1	1	1	1	1	1	1	1	1	1	1	1	1	1	1	1	1	1	1	1	1	1	1	1	1	1	1	1	1	1	1	1	1	1	1	1
High	E2R9N5	RNA binding motif protein 12 OS=Canis lupus familiaris OX=9615 GN=RBM12 PE=4 SV=2	C_familiaris	9	22	8	0.837	0.987033	1	1	1	1	1	1	1	1	1	1	1	1	1	1	1	1	1	1	1	1	1	1	1	1	1	1	1	1	1	1	1	1	1	1	1	1	1	1	1	1	1
High	A0A5F4BQT8	Integrin subunit alpha V OS=Canis lupus familiaris OX=9615 GN=ITGAV PE=4 SV=1	C_familiaris	6	14	6	1.097	0.9912	1	1	1	1	1	1	1	1	1	1	1	1	1	1	1	1	1	1	1	1	1	1	1	1	1	1	1	1	1	1	1	1	1	1	1	1	1	1	1	1	1
High	F1PPJ1	Phosphatidylinositol-5-phosphate 4-kinase type 2 alpha OS=Canis lupus familiaris OX=9615 GN=PIP4K2A PE=4 SV=2	C_familiaris	7	27	7	0.471	0.933819	1	1	1	1	Not Found	Not Found	1	1	1	1	1	1	1	1	1	1	1	1	1	1	1	1	1	1	1	1	1	1	1	1	1	1	1	1	1	1	1	1	1	1	1
High	E2R115	CD226 molecule OS=Canis lupus familiaris OX=9615 GN=CD226 PE=4 SV=2	C_familiaris	7	49	7	0.454	0.933819	1	1	1	1	Not Found	1	Not Found	1	1	1	1	1	1	1	1	1	1	1	1	1	1	1	1	1	1	1	1	1	1	1	1	1	1	1	1	1	1	1	1	1	1
High	F1Q435	Transglutaminase 2 OS=Canis lupus familiaris OX=9615 GN=TGM2 PE=4 SV=3	C_familiaris	4	23	4	0.789	0.96376	1	1	1	1	Not Found	1	Not Found	1	1	1	1	1	1	1	1	1	1	1	1	1	1	1	1	1	1	1	1	1	1	1	1	1	1	1	1	1	1	1	1	1	1
High	A0A5F4C3X9	Actinin alpha 4 OS=Canis lupus familiaris OX=9615 GN=ACTN4 PE=4 SV=1	C_familiaris	38	481	4	0.95	0.995619	1	1	1	1	Not Found	Not Found	1	1	1	1	1	1	1	1	1	1	1	1	1	1	1	1	1	1	1	1	1	1	1	1	1	1	1	1	1	1	1	1	1	1	1
High	E2RB37	Protein disulfide isomerase family A member 6 OS=Canis lupus familiaris OX=9615 GN=PDIA6 PE=3 SV=1	C_familiaris	4	27	4	2.883	0.905372	1	1	1	1	Not Found	Not Found	Not Found	1	1	1	1	1	1	1	1	1	1	1	1	1	1	1	1	1	1	1	1	1	1	1	1	1	1	1	1	1	1	1	1	1	1
High	E2QXP3	Arginyl aminopeptidase OS=Canis lupus familiaris OX=9615 GN=RNPEP PE=4 SV=2	C_familiaris	8	15	8	0.805	0.973961	1	1	1	Not Found	1	1	1	1	1	1	1	1	1	1	1	1	1	1	1	1	1	1	1	1	1	1	1	1	1	1	1	1	1	1	1	1	1	1	1	1	Not Found
High	E2QX84	Heat shock protein family A (Hsp70) member 2 OS=Canis lupus familiaris OX=9615 GN=HSPA2 PE=3 SV=1	C_familiaris	13	576	6	0.707	0.952848	Not Found	1	Not Found	Not Found	Not Found	Not Found	Not Found	1	1	1	1	1	1	1	1	1	1	1	1	1	1	1	1	1	1	1	1	1	1	1	1	1	1	1	1	1	1	1	1	1	1
High	A0A5F4D103	Fc fragment of IgE receptor II OS=Canis lupus familiaris OX=9615 GN=FCER2 PE=4 SV=1	C_familiaris	3	8	3	0.696	0.952461	1	1	Not Found	1	Not Found	Not Found	Not Found	1	1	1	1	1	1	1	1	1	1	1	1	1	1	Not Found	Not Found	Not Found	1	1	1	1	1	1	1	1	1	1	1	1	1	Not Found	1	1	1
High	A0A5F4D856	Proline-serine-threonine phosphatase interacting protein 1 OS=Canis lupus familiaris OX=9615 GN=PSTPIP1 PE=4 SV=1	C_familiaris	2	14	2	2.135	0.933819	1	1	1	1	Not Found	Not Found	Not Found	1	1	Not Found	1	Not Found	1	1	1	1	1	1	1	1	1	1	Not Found	Not Found	1	Not Found	1	1	1	1	1	1	1	1	1	1	1	1	Not Found	Not Found	1
High	F1PG13	Ubiquitin conjugating enzyme E2 O OS=Canis lupus familiaris OX=9615 GN=UBE2O PE=4 SV=3	C_familiaris	5	7	5	0.42	0.933819	1	Not Found	1	1	1	1	Not Found	1	1	1	1	1	1	1	1	1	1	1	1	Not Found	1	1	1	1	1	1	1	Not Found	Not Found	Not Found	1	1	Not Found	1	Not Found	1	1	1	Not Found	Not Found	Not Found
High	J9P8N1	STAM binding protein OS=Canis lupus familiaris OX=9615 GN=STAMBP PE=4 SV=2	C_familiaris	2	4	2	0.599	0.938246	Not Found	Not Found	Not Found	Not Found	Not Found	1	Not Found	1	1	1	1	1	1	1	1	1	1	1	1	Not Found	Not Found	1	1	1	1	1	1	1	1	1	1	1	1	1	1	1	1	1	Not Found	Not Found	Not Found
High	F1P9K6	Junctional adhesion molecule 3 OS=Canis lupus familiaris OX=9615 GN=JAM3 PE=4 SV=2	C_familiaris	3	13	3	0.874	0.979433	Not Found	Not Found	1	1	Not Found	Not Found	Not Found	1	1	Not Found	1	Not Found	1	1	1	1	1	1	Not Found	1	Not Found	Not Found	1	1	1	1	1	1	1	1	1	1	1	1	1	1	1	1	Not Found	1	Not Found
High	F1PJE7	ATPase copper transporting beta OS=Canis lupus familiaris OX=9615 GN=ATP7B PE=3 SV=3	C_familiaris	4	7	4	0.419	0.933819	1	Not Found	Not Found	1	Not Found	Not Found	1	1	1	1	1	1	1	1	1	Not Found	1	1	Not Found	Not Found	1	1	1	1	1	1	1	1	1	1	Not Found	Not Found	Not Found	Not Found	Not Found	Not Found	Not Found	Not Found	Not Found	Not Found	Not Found
High	A0A5F4BTM1	Uncharacterized protein OS=Canis lupus familiaris OX=9615 PE=4 SV=1	C_familiaris	10	793	2	1.594	0.944788	1	1	Not Found	Not Found	Not Found	1	Not Found	1	Not Found	Not Found	Not Found	Not Found	Not Found	Not Found	Not Found	Not Found	Not Found	Not Found	Not Found	Not Found	Not Found	Not Found	1	Not Found	Not Found	Not Found	Not Found	1	Not Found	1	Not Found	Not Found	Not Found	Not Found	Not Found	1	1	Not Found	Not Found	Not Found	Not Found
High	E2RQ14	Annexin OS=Canis lupus familiaris OX=9615 GN=ANXA5 PE=3 SV=3	C_familiaris	10	57	10	0.426	0.933819	1	1	1	1	1	1	1	1	1	1	1	1	1	1	1	1	1	1	1	1	1	1	1	1	1	1	1	1	1	1	1	1	1	1	1	1	1	1	1	1	1
High	E2QW49	Proliferation-associated 2G4 OS=Canis lupus familiaris OX=9615 GN=PA2G4 PE=4 SV=1	C_familiaris	9	55	9	0.405	0.933819	1	1	1	1	1	1	1	1	1	1	1	1	1	1	1	1	1	1	1	1	1	1	1	1	1	1	1	1	1	1	1	1	1	1	1	1	1	1	1	1	1
High	F1PG85	Solute carrier family 44 member 2 OS=Canis lupus familiaris OX=9615 GN=SLC44A2 PE=3 SV=3	C_familiaris	3	28	3	0.496	0.933819	1	1	1	1	1	1	1	1	1	1	1	1	1	1	1	1	1	1	1	1	1	1	1	1	1	1	1	1	1	1	1	1	1	1	1	1	1	1	1	1	1
High	E2RHG2	Thioredoxin domain-containing protein OS=Canis lupus familiaris OX=9615 GN=PRDX1 PE=4 SV=2	C_familiaris	6	121	3	0.552	0.935358	1	1	1	1	1	1	Not Found	1	1	1	1	1	1	1	1	1	1	1	1	1	1	1	1	1	1	1	1	1	1	1	1	1	1	1	1	1	1	1	1	1	1
High	F1P624	Cullin associated and neddylation dissociated 1 OS=Canis lupus familiaris OX=9615 GN=CAND1 PE=4 SV=2	C_familiaris	12	41	12	0.731	0.956644	1	1	1	1	1	1	1	1	1	1	1	1	1	1	1	1	1	1	1	1	1	1	1	1	1	Not Found	1	1	1	1	1	1	1	1	1	1	1	1	1	1	1
High	J9P870	Insulin like growth factor binding protein 6 OS=Canis lupus familiaris OX=9615 GN=IGFBP6 PE=4 SV=2	C_familiaris	6	29	6	1.263	0.979433	1	1	1	1	1	1	Not Found	1	1	1	1	1	1	Not Found	Not Found	1	1	1	1	1	1	1	1	1	1	Not Found	1	1	1	1	1	1	1	1	1	1	1	1	1	1	1
High	J9P3H7	UBA domain-containing protein OS=Canis lupus familiaris OX=9615 GN=DDI2 PE=4 SV=2	C_familiaris	4	10	4	1.688	0.940442	1	1	Not Found	Not Found	1	1	Not Found	1	1	1	1	1	1	1	1	1	1	1	1	1	1	1	1	1	1	1	1	1	1	1	1	1	1	1	1	Not Found	1	1	1	1	Not Found
High	A0A5F4DL21	Uncharacterized protein OS=Canis lupus familiaris OX=9615 GN=NCSTN PE=4 SV=1	C_familiaris	4	8	4	0.509	0.933819	1	1	1	1	Not Found	Not Found	Not Found	1	1	Not Found	1	1	Not Found	Not Found	Not Found	1	1	Not Found	1	1	Not Found	1	1	1	1	1	1	1	1	1	1	1	1	1	1	1	1	1	1	1	Not Found
High	E2RNX6	Notchless homolog 1 OS=Canis lupus familiaris OX=9615 GN=NLE1 PE=4 SV=3	C_familiaris	2	5	2	0.398	0.933819	Not Found	1	Not Found	Not Found	Not Found	1	Not Found	1	1	Not Found	Not Found	Not Found	1	1	1	1	1	1	Not Found	Not Found	Not Found	1	1	1	1	1	1	1	1	1	1	1	1	Not Found	Not Found	Not Found	Not Found	Not Found	Not Found	Not Found	Not Found
High	F1P8L7	Rab GDP dissociation inhibitor OS=Canis lupus familiaris OX=9615 GN=GDI2 PE=3 SV=1	C_familiaris	18	189	10	0.259	0.772554	1	1	1	1	1	1	1	1	1	1	1	1	1	1	1	1	1	1	1	1	1	1	1	1	1	1	1	1	1	1	1	1	1	1	1	1	1	1	1	1	1
High	E2RGD3	Twinfilin actin binding protein 2 OS=Canis lupus familiaris OX=9615 GN=TWF2 PE=4 SV=2	C_familiaris	8	40	7	1.416	0.957455	1	1	1	1	1	1	1	1	1	1	1	1	1	1	1	1	1	1	1	1	1	1	1	1	1	1	1	1	1	1	1	1	1	1	1	1	1	1	1	1	1
High	A0A5F4BUM0	Uncharacterized protein OS=Canis lupus familiaris OX=9615 GN=LOC607460 PE=4 SV=1	C_familiaris	8	30	8	1.278	0.972144	1	1	1	1	1	1	1	1	1	1	1	1	1	1	1	1	1	1	1	1	1	1	1	1	1	1	1	1	1	1	1	1	1	1	1	1	1	1	1	1	1
High	F1PBT3	Fructose-bisphosphate aldolase OS=Canis lupus familiaris OX=9615 GN=ALDOA PE=3 SV=3	C_familiaris	22	935	3	0.827	0.982432	1	1	1	1	1	1	1	1	1	1	1	1	1	1	1	1	1	1	1	1	1	1	1	1	1	1	1	1	1	1	1	1	1	1	1	1	1	1	1	1	1
High	J9P9T3	Adenylate kinase isoenzyme 1 OS=Canis lupus familiaris OX=9615 GN=AK1 PE=3 SV=1	C_familiaris	6	25	6	0.56	0.938246	1	1	1	1	Not Found	1	1	1	1	1	1	1	1	1	1	1	1	1	1	1	1	1	1	1	1	1	1	1	1	1	1	1	1	1	1	1	1	1	1	1	1
High	E2QXD1	Annexin OS=Canis lupus familiaris OX=9615 GN=ANXA7 PE=3 SV=2	C_familiaris	12	30	12	1.238	0.978261	Not Found	1	1	1	1	1	1	1	1	1	1	1	1	1	1	1	1	1	1	1	1	1	1	1	1	1	1	1	1	1	1	1	1	1	1	1	1	1	1	1	1
High	F1PH57	NCK associated protein 1 OS=Canis lupus familiaris OX=9615 GN=NCKAP1 PE=4 SV=2	C_familiaris	6	7	6	0.342	0.884543	1	1	1	1	1	1	1	1	1	1	1	1	1	1	Not Found	1	1	1	1	1	1	1	1	1	1	1	1	1	1	Not Found	1	1	1	1	1	1	1	1	1	1	1
High	J9NZ45	RAP2B, member of RAS oncogene family OS=Canis lupus familiaris OX=9615 GN=RAP2B PE=4 SV=2	C_familiaris	3	19	3	0.426	0.905372	1	1	1	1	Not Found	1	Not Found	1	1	1	1	1	1	1	1	1	1	1	1	1	1	1	1	1	1	1	1	1	1	1	1	1	1	1	1	1	1	1	1	1	1
High	E2R8W7	Calcium binding protein 39 OS=Canis lupus familiaris OX=9615 GN=CAB39 PE=4 SV=1	C_familiaris	8	29	7	0.698	0.953219	1	1	1	1	Not Found	1	Not Found	1	1	1	1	1	1	1	1	1	1	1	1	1	1	1	1	1	1	1	1	1	1	1	1	1	1	1	1	1	1	1	1	1	1
High	E2QX78	Solute carrier family 43 member 3 OS=Canis lupus familiaris OX=9615 GN=SLC43A3 PE=4 SV=1	C_familiaris	3	22	3	0.979	0.995619	1	Not Found	1	1	Not Found	1	1	1	1	1	1	1	1	1	1	1	1	1	1	1	1	Not Found	Not Found	Not Found	1	1	1	1	1	1	1	1	1	1	1	1	1	1	1	1	1
High	A0A5F4CST2	Tetraspanin 14 OS=Canis lupus familiaris OX=9615 GN=TSPAN14 PE=4 SV=1	C_familiaris	4	19	4	1.012	0.997778	Not Found	1	1	1	1	1	1	1	1	Not Found	1	1	Not Found	1	Not Found	1	1	1	1	1	Not Found	Not Found	1	Not Found	1	1	1	1	1	1	1	1	1	1	1	1	1	1	Not Found	1	1
High	J9P1D1	Glia maturation factor OS=Canis lupus familiaris OX=9615 GN=GMFG PE=3 SV=2	C_familiaris	2	2	2	1.113	0.995619	Not Found	Not Found	1	Not Found	Not Found	Not Found	Not Found	1	1	1	1	1	1	1	1	1	1	1	1	1	1	1	1	1	1	1	1	1	1	1	1	1	1	1	1	1	1	1	Not Found	Not Found	1
High	F1Q0B6	Src kinase associated phosphoprotein 2 OS=Canis lupus familiaris OX=9615 GN=SKAP2 PE=4 SV=2	C_familiaris	2	10	2	0.752	0.953219	Not Found	1	Not Found	1	Not Found	1	Not Found	1	1	Not Found	Not Found	Not Found	1	Not Found	Not Found	1	1	1	1	1	1	1	1	1	1	1	1	1	1	1	1	1	1	1	1	1	1	1	Not Found	Not Found	1
High	F1Q0H0	N(alpha)-acetyltransferase 10, NatA catalytic subunit OS=Canis lupus familiaris OX=9615 GN=NAA10 PE=4 SV=2	C_familiaris	3	15	3	1.17	0.99482	Not Found	1	1	1	Not Found	Not Found	Not Found	1	1	Not Found	1	Not Found	1	Not Found	Not Found	1	1	1	Not Found	Not Found	Not Found	1	1	1	1	1	1	1	1	1	Not Found	Not Found	1	1	1	1	1	1	1	1	1
High	H9GWB5	SRCR domain-containing protein OS=Canis lupus familiaris OX=9615 PE=4 SV=3	C_familiaris	3	3	3	1.267	0.953219	1	1	Not Found	Not Found	Not Found	Not Found	1	1	Not Found	Not Found	Not Found	1	Not Found	Not Found	Not Found	1	1	1	Not Found	Not Found	1	Not Found	Not Found	Not Found	1	1	Not Found	1	1	1	Not Found	1	1	1	1	Not Found	1	Not Found	1	1	Not Found
High	E2R9D5	Uncharacterized protein OS=Canis lupus familiaris OX=9615 PE=4 SV=2	C_familiaris	2	9	2	0.305	0.77035	1	1	1	1	Not Found	Not Found	Not Found	Not Found	1	Not Found	Not Found	Not Found	1	1	1	Not Found	Not Found	Not Found	Not Found	Not Found	Not Found	Not Found	Not Found	Not Found	1	1	1	Not Found	1	1	Not Found	1	Not Found	Not Found	1	1	1	Not Found	1	1	1
High	F1PTG8	Trifunctional purine biosynthetic protein adenosine-3 OS=Canis lupus familiaris OX=9615 GN=LOC100856570 PE=3 SV=3	C_familiaris	2	3	2	2.537	0.933819	Not Found	Not Found	1	1	Not Found	Not Found	Not Found	1	1	1	1	1	Not Found	Not Found	Not Found	Not Found	1	Not Found	Not Found	Not Found	Not Found	Not Found	1	Not Found	Not Found	Not Found	1	1	1	1	1	1	1	1	Not Found	1	1	1	Not Found	Not Found	Not Found
High	A0A5F4DJ40	Prohibitin 2 OS=Canis lupus familiaris OX=9615 GN=PHB2 PE=4 SV=1	C_familiaris	2	3	2	0.603	0.953219	1	1	1	1	Not Found	1	Not Found	1	1	1	1	1	1	1	Not Found	Not Found	Not Found	Not Found	Not Found	Not Found	Not Found	1	Not Found	Not Found	1	1	1	Not Found	Not Found	Not Found	Not Found	Not Found	Not Found	Not Found	Not Found	Not Found	Not Found	Not Found	1	1	Not Found
High	A0A5F4D0A6	Aspartyl-tRNA synthetase OS=Canis lupus familiaris OX=9615 GN=DARS1 PE=4 SV=1	C_familiaris	2	3	2	0.327	0.826973	Not Found	Not Found	Not Found	Not Found	Not Found	Not Found	Not Found	1	1	1	1	1	1	1	1	1	1	1	Not Found	Not Found	Not Found	Not Found	1	1	Not Found	Not Found	Not Found	Not Found	1	Not Found	Not Found	Not Found	1	1	1	Not Found	Not Found	Not Found	Not Found	Not Found	Not Found
High	E2R002	Prostaglandin reductase 1 OS=Canis lupus familiaris OX=9615 GN=PTGR1 PE=4 SV=2	C_familiaris	11	85	11	0.167	0.485315	1	1	1	1	1	1	1	1	1	1	1	1	1	1	1	1	1	1	1	1	1	1	1	1	1	1	1	1	1	1	1	1	1	1	1	1	1	1	1	1	1
High	J9P920	Ubiquitin like modifier activating enzyme 1 OS=Canis lupus familiaris OX=9615 GN=UBA1 PE=3 SV=2	C_familiaris	10	41	10	0.508	0.933819	1	1	1	1	1	1	1	1	1	1	1	1	1	1	1	1	1	1	1	1	1	1	1	1	1	1	1	1	1	1	1	1	1	1	1	1	1	1	1	1	1
High	F1PE09	6-phosphogluconate dehydrogenase, decarboxylating OS=Canis lupus familiaris OX=9615 GN=PGD PE=3 SV=3	C_familiaris	7	38	7	0.428	0.933819	1	1	1	1	1	1	1	1	1	1	1	1	1	1	1	1	1	1	1	1	1	1	1	1	1	1	1	1	1	1	1	1	1	1	1	1	1	1	1	1	1
High	A0A5F4BSW0	Uncharacterized protein OS=Canis lupus familiaris OX=9615 PE=4 SV=1	C_familiaris	5	27	5	0.519	0.935358	1	1	1	1	1	1	1	1	1	1	1	1	1	1	1	1	1	1	1	1	1	1	1	1	1	1	1	1	1	1	1	1	1	1	1	1	1	1	1	1	1
High	P52784	ATP-dependent 6-phosphofructokinase, muscle type OS=Canis lupus familiaris OX=9615 GN=PFKM PE=2 SV=2	C_familiaris	7	29	7	0.588	0.938246	1	1	1	1	1	1	1	1	1	1	1	1	1	1	1	1	1	1	1	1	1	1	1	1	1	1	1	1	1	1	1	1	1	1	1	1	1	1	1	1	1
High	F1P797	5-aminoimidazole-4-carboxamide ribonucleotide formyltransferase/IMP cyclohydrolase OS=Canis lupus familiaris OX=9615 GN=ATIC PE=3 SV=2	C_familiaris	14	39	14	1.131	0.986298	1	1	1	1	1	1	1	1	1	1	1	1	1	1	1	1	1	1	1	1	1	1	1	1	1	1	1	1	1	1	1	1	1	1	1	1	1	1	1	1	1
High	A0A5F4CKD6	Uncharacterized protein OS=Canis lupus familiaris OX=9615 GN=CSNK2A1 PE=4 SV=1	C_familiaris	5	23	5	0.516	0.933819	1	1	1	1	1	1	Not Found	1	1	1	1	1	1	1	1	1	1	1	1	1	1	1	1	1	1	1	1	1	1	1	1	1	1	1	1	1	1	1	1	1	1
High	A0A5F4CE12	Uncharacterized protein OS=Canis lupus familiaris OX=9615 PE=4 SV=1	C_familiaris	8	2459	3	0.555	0.938246	1	1	1	1	1	1	1	1	1	1	1	Not Found	1	1	1	1	1	1	1	1	1	1	1	1	1	1	1	1	1	1	1	1	1	1	1	1	1	1	1	1	1
High	A0A5F4BSS2	Stress-70 protein, mitochondrial OS=Canis lupus familiaris OX=9615 GN=HSPA9 PE=4 SV=1	C_familiaris	3	6	3	1.14	0.99482	1	1	1	1	1	1	1	1	1	1	1	1	1	1	1	1	1	1	1	1	Not Found	1	1	1	1	1	1	Not Found	1	1	1	1	1	1	1	1	1	1	1	1	1
High	J9P9M0	RAB32, member RAS oncogene family OS=Canis lupus familiaris OX=9615 GN=RAB32 PE=4 SV=2	C_familiaris	4	19	4	1.073	0.995619	1	1	1	1	Not Found	1	1	1	1	1	1	1	1	1	1	1	1	1	1	1	1	1	1	1	1	1	1	1	1	1	1	1	1	1	1	1	1	1	Not Found	1	1
High	F1PEJ5	Tetraspanin OS=Canis lupus familiaris OX=9615 GN=TSPAN33 PE=3 SV=3	C_familiaris	4	43	4	0.182	0.54424	1	1	1	1	Not Found	Not Found	Not Found	1	1	1	1	1	1	1	1	1	1	1	1	1	1	1	1	1	1	1	1	1	1	1	1	1	1	1	1	1	1	1	1	1	1
High	F1Q089	Xg glycoprotein OS=Canis lupus familiaris OX=9615 GN=XG PE=4 SV=3	C_familiaris	2	6	2	0.929	0.995619	1	1	1	Not Found	1	1	1	1	1	Not Found	1	Not Found	1	1	1	1	1	1	1	1	1	1	1	1	1	1	1	1	1	1	1	1	1	1	1	1	1	1	1	1	1
High	A0A5F4BRV8	Uncharacterized protein OS=Canis lupus familiaris OX=9615 GN=VIM PE=4 SV=1	C_familiaris	4	8	4	0.514	0.933819	1	1	1	1	1	1	1	1	1	1	1	1	1	1	1	1	1	1	Not Found	Not Found	1	Not Found	Not Found	1	1	1	1	1	1	1	1	1	1	1	1	1	1	1	1	1	1
High	F1PHZ3	Phosphatidylinositol transfer protein beta OS=Canis lupus familiaris OX=9615 GN=PITPNB PE=4 SV=3	C_familiaris	4	9	4	0.496	0.933819	Not Found	Not Found	1	1	Not Found	Not Found	1	1	1	1	1	1	1	1	1	1	1	1	1	1	1	1	1	1	1	1	1	1	1	1	1	1	1	1	1	1	1	1	1	1	1
High	F1P9Q2	SH3 domain containing kinase binding protein 1 OS=Canis lupus familiaris OX=9615 GN=SH3KBP1 PE=4 SV=2	C_familiaris	4	14	4	0.839	0.979433	1	1	Not Found	1	1	Not Found	Not Found	1	1	1	1	1	1	1	1	1	1	1	1	1	1	Not Found	Not Found	Not Found	1	1	1	1	1	1	1	1	1	1	1	1	1	1	1	1	1
High	F1PEG6	Docking protein 2 OS=Canis lupus familiaris OX=9615 GN=DOK2 PE=4 SV=2	C_familiaris	4	18	4	1.313	0.969805	1	Not Found	1	1	Not Found	Not Found	Not Found	1	1	1	1	1	1	1	1	1	1	1	1	1	1	1	1	1	1	1	1	1	1	1	1	1	1	Not Found	1	1	1	1	1	Not Found	1
High	A0A5F4CC39	Elastin microfibril interfacer 1 OS=Canis lupus familiaris OX=9615 GN=EMILIN1 PE=4 SV=1	C_familiaris	6	36	6	3.627	0.763775	1	1	1	1	1	1	1	1	1	Not Found	1	Not Found	1	1	1	1	1	1	1	1	1	Not Found	Not Found	Not Found	Not Found	Not Found	1	1	1	1	1	1	1	1	Not Found	1	1	1	1	1	1
High	F1PFB7	WAS/WASL interacting protein family member 1 OS=Canis lupus familiaris OX=9615 GN=WIPF1 PE=4 SV=3	C_familiaris	2	7	2	1.691	0.938246	1	1	1	1	Not Found	Not Found	Not Found	1	1	Not Found	1	1	1	1	1	1	1	1	1	1	1	1	1	1	1	Not Found	Not Found	1	1	1	1	1	1	1	1	1	1	1	Not Found	Not Found	1
High	A0A5F4C1F0	STEAP3 metalloreductase OS=Canis lupus familiaris OX=9615 GN=STEAP3 PE=4 SV=1	C_familiaris	9	16	9	0.821	0.972144	Not Found	Not Found	1	1	Not Found	Not Found	Not Found	1	1	1	1	1	1	1	1	1	1	1	1	1	Not Found	1	1	1	1	1	1	1	1	1	1	1	1	1	1	1	1	1	1	1	Not Found
High	J9P6Y7	Solute carrier family 30 member 1 OS=Canis lupus familiaris OX=9615 GN=SLC30A1 PE=4 SV=1	C_familiaris	2	3	2	0.801	0.987033	1	1	1	1	Not Found	Not Found	Not Found	1	1	1	1	1	1	1	Not Found	Not Found	1	Not Found	Not Found	1	1	Not Found	Not Found	Not Found	1	Not Found	1	1	1	1	1	1	Not Found	1	1	1	Not Found	1	Not Found	Not Found	Not Found
High	A0A5F4BZF0	Ubiquinol-cytochrome c reductase core protein 2 OS=Canis lupus familiaris OX=9615 GN=UQCRC2 PE=4 SV=1	C_familiaris	3	5	3	0.72	0.953219	1	1	1	1	1	Not Found	Not Found	1	1	1	1	1	Not Found	Not Found	Not Found	1	1	1	Not Found	Not Found	Not Found	1	1	1	Not Found	Not Found	Not Found	Not Found	Not Found	Not Found	Not Found	Not Found	Not Found	Not Found	Not Found	Not Found	Not Found	Not Found	1	1	1
High	J9NTA1	Methyltransferase like 7A OS=Canis lupus familiaris OX=9615 GN=METTL7A PE=4 SV=2	C_familiaris	2	5	2	3.46	0.841834	Not Found	Not Found	1	1	1	Not Found	Not Found	Not Found	1	Not Found	Not Found	1	Not Found	Not Found	Not Found	1	1	1	1	Not Found	1	Not Found	1	Not Found	Not Found	Not Found	Not Found	Not Found	Not Found	Not Found	1	1	1	Not Found	1	1	Not Found	Not Found	Not Found	1	1
High	F1PRL5	Solute carrier family 25 member 5 OS=Canis lupus familiaris OX=9615 GN=SLC25A5 PE=3 SV=2	C_familiaris	2	2	2	94.196	4.73546e-05	Not Found	1	1	1	Not Found	Not Found	Not Found	1	1	Not Found	Not Found	Not Found	Not Found	Not Found	1	Not Found	Not Found	Not Found	Not Found	Not Found	Not Found	Not Found	Not Found	1	1	Not Found	Not Found	Not Found	1	1	1	Not Found	Not Found	Not Found	Not Found	1	Not Found	Not Found	Not Found	1	1
High	E2RC10	Synaptophysin like 1 OS=Canis lupus familiaris OX=9615 GN=SYPL1 PE=4 SV=3	C_familiaris	4	35	4	0.149	0.435272	1	1	1	1	1	1	1	1	1	1	1	1	1	1	1	1	1	1	1	1	1	1	1	1	1	1	1	1	1	1	1	1	1	1	1	1	1	1	1	1	1
High	F1Q4J0	Glucosidase II alpha subunit OS=Canis lupus familiaris OX=9615 GN=GANAB PE=3 SV=2	C_familiaris	9	48	9	2.626	0.890127	1	1	1	1	1	1	1	1	1	1	1	1	1	1	1	1	1	1	1	1	1	1	1	1	1	1	1	1	1	1	1	1	1	1	1	1	1	1	1	1	1
High	J9NTG7	CD55 molecule OS=Canis lupus familiaris OX=9615 GN=CD55 PE=4 SV=2	C_familiaris	4	36	4	0.371	0.910199	1	1	1	1	1	1	1	1	1	1	1	1	1	1	1	1	1	1	1	1	1	1	1	1	1	1	1	1	1	1	1	1	1	1	1	1	1	1	1	1	1
High	F1Q260	Lysosomal associated membrane protein 1 OS=Canis lupus familiaris OX=9615 GN=LAMP1 PE=3 SV=3	C_familiaris	4	9	4	1.384	0.952848	1	1	1	1	1	1	1	1	1	1	1	1	1	1	1	1	1	1	1	1	1	1	1	1	1	1	1	1	1	1	1	1	1	1	1	1	1	1	1	1	1
High	A0A5F4D061	Solute carrier family 2, facilitated glucose transporter member 3 OS=Canis lupus familiaris OX=9615 GN=SLC2A3 PE=4 SV=1	C_familiaris	4	35	4	1.362	0.968974	1	1	1	1	1	1	1	1	1	1	1	1	1	1	1	1	1	1	1	1	1	1	1	1	1	1	1	1	1	1	1	1	1	1	1	1	1	1	1	1	1
High	F1PB85	Serpin family A member 7 OS=Canis lupus familiaris OX=9615 GN=SERPINA7 PE=3 SV=2	C_familiaris	8	18	8	0.25	0.678049	1	1	1	1	1	1	1	1	1	1	1	1	1	1	1	1	1	1	1	1	1	1	1	1	1	1	1	1	1	1	1	1	Not Found	1	1	1	1	1	1	1	1
High	E2RGP6	Tumor susceptibility 101 OS=Canis lupus familiaris OX=9615 GN=TSG101 PE=4 SV=2	C_familiaris	7	17	7	0.462	0.933819	1	1	1	1	1	1	Not Found	1	1	1	1	1	1	1	1	1	1	1	1	1	1	1	1	1	1	1	1	1	1	1	1	1	1	1	1	1	1	1	1	1	1
High	E2R413	Capping actin protein, gelsolin like OS=Canis lupus familiaris OX=9615 GN=CAPG PE=4 SV=3	C_familiaris	7	37	7	1.187	0.972144	1	1	1	1	Not Found	1	1	1	1	1	1	1	1	1	1	1	1	1	1	1	1	1	1	1	1	1	1	1	1	1	1	1	1	1	1	1	1	1	1	1	1
High	A0A5F4D768	Chaperonin containing TCP1 subunit 5 OS=Canis lupus familiaris OX=9615 GN=CCT5 PE=4 SV=1	C_familiaris	10	37	10	0.795	0.985816	1	Not Found	1	1	1	1	1	1	1	1	1	1	1	1	1	1	1	1	1	1	1	1	1	1	1	1	1	1	1	1	1	1	1	1	1	1	1	1	1	1	1
High	F1P699	Phosphatidylethanolamine-binding protein 1 OS=Canis lupus familiaris OX=9615 GN=PEBP1 PE=4 SV=3	C_familiaris	5	37	5	0.273	0.796929	Not Found	1	1	1	1	1	Not Found	1	1	1	1	1	1	1	1	1	1	1	1	1	1	1	1	1	1	1	1	1	1	1	1	1	1	1	1	1	1	1	1	1	1
High	J9NT73	Brain abundant membrane attached signal protein 1 OS=Canis lupus familiaris OX=9615 GN=BASP1 PE=4 SV=2	C_familiaris	5	58	5	1.563	0.944788	1	1	1	1	1	Not Found	Not Found	1	1	Not Found	1	1	1	1	1	1	1	1	1	1	1	1	1	1	1	1	1	1	1	1	1	1	1	1	1	1	1	1	1	1	1
High	A0A5F4CSM6	Cell division cycle 37 OS=Canis lupus familiaris OX=9615 GN=CDC37 PE=4 SV=1	C_familiaris	6	21	6	4.569	0.611097	Not Found	Not Found	Not Found	Not Found	Not Found	Not Found	Not Found	1	1	1	1	1	1	1	1	1	1	1	1	1	1	1	1	1	1	1	1	1	1	1	1	1	1	1	1	1	1	1	1	1	1
High	E2QYG6	ATPase H+ transporting V1 subunit A OS=Canis lupus familiaris OX=9615 GN=ATP6V1A PE=3 SV=1	C_familiaris	5	18	5	0.657	0.944788	1	1	Not Found	Not Found	Not Found	Not Found	Not Found	1	1	1	1	1	1	1	1	1	1	1	1	1	1	1	1	1	1	1	1	1	1	1	1	1	1	1	1	1	Not Found	Not Found	Not Found	1	Not Found
High	F1PNY6	Transient receptor potential cation channel subfamily C member 6 OS=Canis lupus familiaris OX=9615 GN=TRPC6 PE=3 SV=3	C_familiaris	6	13	6	0.604	0.938246	1	Not Found	1	1	1	Not Found	Not Found	1	1	1	1	1	1	1	1	Not Found	1	1	1	1	1	1	1	1	Not Found	Not Found	1	Not Found	1	1	1	1	Not Found	1	1	1	1	1	Not Found	Not Found	1
High	F1PAY4	TNF alpha induced protein 8 OS=Canis lupus familiaris OX=9615 GN=TNFAIP8 PE=4 SV=2	C_familiaris	2	5	2	1.222	0.952848	1	1	1	1	1	1	Not Found	1	1	1	1	Not Found	Not Found	Not Found	Not Found	1	1	1	1	Not Found	1	Not Found	Not Found	Not Found	1	1	Not Found	1	1	1	1	1	1	1	Not Found	1	1	1	1	1	Not Found
High	A0A5F4BUN7	Fructose-bisphosphatase 1 OS=Canis lupus familiaris OX=9615 GN=FBP1 PE=4 SV=1	C_familiaris	4	8	4	1.02	0.99563	1	Not Found	1	1	Not Found	Not Found	Not Found	Not Found	1	1	1	1	1	1	1	1	1	1	1	1	Not Found	1	1	1	1	1	1	1	1	Not Found	Not Found	Not Found	1	Not Found	1	Not Found	Not Found	Not Found	Not Found	Not Found	1
High	A0A5F4BTP4	Adaptor related protein complex 1 subunit beta 1 OS=Canis lupus familiaris OX=9615 GN=AP1B1 PE=4 SV=1	C_familiaris	4	9	4	0.439	0.933819	1	1	1	1	Not Found	Not Found	1	1	1	1	1	1	1	1	1	1	1	1	Not Found	Not Found	Not Found	Not Found	1	1	Not Found	Not Found	1	1	1	1	1	1	Not Found	Not Found	Not Found	1	Not Found	1	Not Found	Not Found	Not Found
High	F1Q3Y2	Dihydropyrimidinase like 3 OS=Canis lupus familiaris OX=9615 GN=DPYSL3 PE=4 SV=2	C_familiaris	6	40	3	0.718	0.979433	1	Not Found	Not Found	1	1	1	1	1	1	1	Not Found	1	1	Not Found	Not Found	Not Found	Not Found	Not Found	Not Found	Not Found	1	1	1	1	1	1	1	Not Found	1	Not Found	1	1	1	Not Found	Not Found	1	1	Not Found	Not Found	Not Found	1
High	F1PIV8	EF-hand domain family member D2 OS=Canis lupus familiaris OX=9615 GN=EFHD2 PE=4 SV=3	C_familiaris	3	8	3	0.894	0.986298	1	1	Not Found	Not Found	Not Found	Not Found	Not Found	1	1	1	1	1	Not Found	Not Found	Not Found	1	1	Not Found	Not Found	Not Found	Not Found	Not Found	Not Found	Not Found	1	Not Found	1	1	Not Found	1	1	1	1	Not Found	1	Not Found	1	Not Found	1	1	1
High	Q6UR05	Multidrug resistance-associated protein 1 OS=Canis lupus familiaris OX=9615 GN=ABCC1 PE=1 SV=1	C_familiaris	2	2	2	0.881	0.986298	1	Not Found	Not Found	1	Not Found	Not Found	Not Found	1	1	Not Found	Not Found	Not Found	Not Found	Not Found	1	1	1	1	Not Found	Not Found	Not Found	1	1	1	Not Found	Not Found	Not Found	Not Found	Not Found	Not Found	Not Found	Not Found	Not Found	Not Found	Not Found	Not Found	Not Found	Not Found	Not Found	Not Found	Not Found
High	Q6Q7P4	Protein 4.1 OS=Canis lupus familiaris OX=9615 GN=EPB41 PE=2 SV=1	C_familiaris	34	1350	4	0.06	0.0408155	1	1	1	1	1	1	1	1	1	1	1	1	1	1	1	1	1	1	1	1	1	1	1	1	1	1	1	1	1	1	1	1	1	1	1	1	1	1	1	1	1
High	A0A5F4C5K8	Membrane palmitoylated protein 2 OS=Canis lupus familiaris OX=9615 GN=MPP2 PE=4 SV=1	C_familiaris	12	40	12	0.512	0.935358	1	1	1	1	1	1	1	1	1	1	1	1	1	1	1	1	1	1	1	1	1	1	1	1	1	1	1	1	1	1	1	1	1	1	1	1	1	1	1	1	1
High	E2RAI8	Oxidative stress responsive kinase 1 OS=Canis lupus familiaris OX=9615 GN=OXSR1 PE=4 SV=2	C_familiaris	6	31	6	1.716	0.938246	1	1	1	1	1	1	1	1	1	1	1	1	1	1	1	1	1	1	1	1	1	1	1	1	1	1	1	1	1	1	1	1	1	1	1	1	1	1	1	1	1
High	A0A5F4DBI9	Vesicle associated membrane protein 3 OS=Canis lupus familiaris OX=9615 GN=VAMP3 PE=4 SV=1	C_familiaris	4	32	4	1.617	0.938246	1	1	1	1	1	1	1	1	1	1	1	1	1	1	1	1	1	1	1	1	1	1	1	1	1	1	1	1	1	1	1	1	1	1	1	1	1	1	1	1	1
High	E2QV08	Malate dehydrogenase OS=Canis lupus familiaris OX=9615 GN=MDH1 PE=3 SV=3	C_familiaris	7	97	7	0.625	0.944788	1	1	1	1	1	1	1	1	1	1	1	1	1	1	1	1	1	1	1	1	1	1	1	1	1	1	1	1	1	1	1	1	1	1	1	1	1	1	1	1	1
High	F6UY11	Proteasome activator subunit 1 OS=Canis lupus familiaris OX=9615 GN=PSME1 PE=4 SV=2	C_familiaris	9	36	9	1.288	0.979433	1	1	1	1	1	1	1	1	1	1	1	1	1	1	1	1	1	1	1	1	1	1	1	1	1	1	1	1	1	1	1	1	1	1	1	1	1	1	1	1	1
High	F1PAF2	Activating transcription factor 6 OS=Canis lupus familiaris OX=9615 GN=ATF6 PE=4 SV=3	C_familiaris	4	24	4	1.128	0.991543	1	1	1	1	1	1	1	1	1	1	1	1	1	1	1	1	1	1	1	1	1	1	1	1	1	1	1	1	1	1	1	1	1	1	1	1	1	1	1	1	1
High	A0A5F4D721	Tropomyosin 3 OS=Canis lupus familiaris OX=9615 GN=TPM3 PE=4 SV=1	C_familiaris	21	363	7	0.949	0.995619	1	1	1	1	1	1	1	1	1	1	1	1	1	1	1	1	1	1	1	1	1	1	1	1	1	1	1	1	1	1	1	1	1	1	1	1	1	1	1	1	1
High	Q3BCQ6	Rh antigen-like protein OS=Canis lupus familiaris OX=9615 GN=Rh30 PE=2 SV=1	C_familiaris	4	93	4	0.042	0.0133588	1	1	1	1	Not Found	1	1	1	1	1	1	1	1	1	1	1	1	1	1	1	1	1	1	1	1	1	1	1	1	1	1	1	1	1	1	1	1	1	1	1	1
High	F1PVP9	RAB1B, member RAS oncogene family OS=Canis lupus familiaris OX=9615 GN=RAB1B PE=4 SV=3	C_familiaris	11	310	4	0.19	0.513937	1	1	1	1	Not Found	1	1	1	1	1	1	1	1	1	1	1	1	1	1	1	1	1	1	1	1	1	1	1	1	1	1	1	1	1	1	1	1	1	1	1	1
High	F1Q2F6	Fatty acid synthase OS=Canis lupus familiaris OX=9615 GN=FASN PE=4 SV=3	C_familiaris	10	13	10	0.611	0.938246	1	1	1	1	1	1	1	1	1	1	1	1	1	1	1	1	1	1	1	1	1	1	1	1	Not Found	1	1	1	1	1	1	1	1	1	1	1	1	1	1	1	1
High	F1PXG0	Sorbitol dehydrogenase OS=Canis lupus familiaris OX=9615 GN=SORD PE=3 SV=2	C_familiaris	8	37	8	1.069	0.99563	Not Found	1	1	1	1	1	1	1	1	1	1	1	1	1	1	1	1	1	1	1	1	1	1	1	1	1	1	1	1	1	1	1	1	1	1	1	1	1	1	1	1
High	E2RPJ4	Glutamate-cysteine ligase catalytic subunit OS=Canis lupus familiaris OX=9615 GN=GCLC PE=4 SV=3	C_familiaris	12	67	12	0.326	0.852724	1	1	1	1	1	Not Found	Not Found	1	1	1	1	1	1	1	1	1	1	1	1	1	1	1	1	1	1	1	1	1	1	1	1	1	1	1	1	1	1	1	1	1	1
High	J9P6R1	Proteasome 26S subunit, non-ATPase 7 OS=Canis lupus familiaris OX=9615 GN=PSMD7 PE=4 SV=1	C_familiaris	7	36	7	0.514	0.933819	1	1	1	1	Not Found	Not Found	1	1	1	1	1	1	1	1	1	1	1	1	1	1	1	1	1	1	1	1	1	1	1	1	1	1	1	1	1	1	1	1	1	1	1
High	F1PKS1	ATP-dependent 6-phosphofructokinase OS=Canis lupus familiaris OX=9615 GN=PFKP PE=3 SV=3	C_familiaris	5	9	5	1.139	0.96883	1	Not Found	1	1	Not Found	Not Found	Not Found	1	1	1	1	1	1	1	1	1	1	1	1	1	1	1	1	1	1	1	Not Found	1	1	1	1	1	1	1	1	Not Found	1	1	Not Found	Not Found	1
High	A0A5F4CWM0	Diaphanous related formin 1 OS=Canis lupus familiaris OX=9615 GN=DIAPH1 PE=4 SV=1	C_familiaris	2	5	2	0.87	0.995619	1	1	1	1	1	Not Found	Not Found	Not Found	Not Found	Not Found	Not Found	1	1	1	1	1	1	1	1	Not Found	1	1	1	1	1	1	1	1	1	1	1	1	1	Not Found	1	Not Found	Not Found	Not Found	1	1	1
High	A0A5F4BTH2	Neutrophil cytosolic factor 2 OS=Canis lupus familiaris OX=9615 GN=NCF2 PE=4 SV=1	C_familiaris	5	10	5	0.92	0.995619	1	Not Found	1	1	Not Found	Not Found	Not Found	1	1	Not Found	1	Not Found	Not Found	Not Found	Not Found	Not Found	Not Found	1	Not Found	1	1	Not Found	Not Found	Not Found	1	1	1	1	1	1	1	1	Not Found	1	1	1	1	1	1	Not Found	Not Found
High	A0A5F4DAB6	Protein tyrosine phosphatase non-receptor type 12 OS=Canis lupus familiaris OX=9615 GN=PTPN12 PE=4 SV=1	C_familiaris	2	11	2	1.008	0.995619	1	1	1	1	1	Not Found	1	1	1	Not Found	1	1	1	1	1	1	1	1	Not Found	Not Found	Not Found	1	1	1	Not Found	Not Found	Not Found	Not Found	Not Found	Not Found	Not Found	Not Found	Not Found	Not Found	Not Found	Not Found	Not Found	Not Found	Not Found	Not Found	Not Found
High	Q4LAL9	Cathepsin D OS=Canis lupus familiaris OX=9615 GN=CTSD PE=2 SV=1	C_familiaris	2	3	2	0.709	0.979433	1	1	1	Not Found	1	1	1	Not Found	Not Found	1	1	Not Found	1	1	1	1	1	Not Found	Not Found	1	Not Found	1	1	1	Not Found	Not Found	Not Found	Not Found	Not Found	Not Found	Not Found	Not Found	Not Found	Not Found	Not Found	Not Found	Not Found	Not Found	Not Found	Not Found	1
High	J9NZ55	Nicotinate-nucleotide pyrophosphorylase [carboxylating] OS=Canis lupus familiaris OX=9615 GN=QPRT PE=3 SV=1	C_familiaris	2	4	2	3.49	0.70123	Not Found	1	1	1	1	Not Found	Not Found	1	1	Not Found	1	Not Found	Not Found	Not Found	Not Found	Not Found	Not Found	Not Found	Not Found	Not Found	Not Found	Not Found	Not Found	Not Found	Not Found	Not Found	Not Found	Not Found	Not Found	Not Found	1	1	Not Found	Not Found	Not Found	1	1	1	Not Found	Not Found	1
High	E2RKW8	Desmoglein-1 OS=Canis lupus familiaris OX=9615 GN=DSG1 PE=4 SV=3	C_familiaris	2	7	2	0.508	0.935358	Not Found	Not Found	Not Found	Not Found	Not Found	Not Found	Not Found	Not Found	Not Found	Not Found	1	Not Found	Not Found	1	1	Not Found	1	Not Found	1	1	Not Found	Not Found	Not Found	Not Found	1	1	1	1	1	Not Found	Not Found	Not Found	Not Found	Not Found	Not Found	Not Found	Not Found	Not Found	1	Not Found	1
High	F1PMH6	Mannose receptor C-type 1 OS=Canis lupus familiaris OX=9615 GN=MRC1 PE=4 SV=3	C_familiaris	2	4	2	0.82	0.995619	Not Found	Not Found	Not Found	Not Found	1	1	1	Not Found	Not Found	Not Found	Not Found	Not Found	Not Found	Not Found	Not Found	Not Found	Not Found	Not Found	Not Found	1	1	Not Found	Not Found	Not Found	Not Found	Not Found	Not Found	1	1	Not Found	1	Not Found	Not Found	1	1	1	Not Found	Not Found	Not Found	Not Found	1
High	E2QXQ9	Tropomodulin 1 OS=Canis lupus familiaris OX=9615 GN=TMOD1 PE=4 SV=1	C_familiaris	14	147	14	0.081	0.116416	1	1	1	1	1	1	1	1	1	1	1	1	1	1	1	1	1	1	1	1	1	1	1	1	1	1	1	1	1	1	1	1	1	1	1	1	1	1	1	1	1
High	J9P9V8	Tetraspanin OS=Canis lupus familiaris OX=9615 GN=CD82 PE=3 SV=2	C_familiaris	7	135	7	0.088	0.118335	1	1	1	1	1	1	1	1	1	1	1	1	1	1	1	1	1	1	1	1	1	1	1	1	1	1	1	1	1	1	1	1	1	1	1	1	1	1	1	1	1
High	E2RD95	G protein subunit beta 2 OS=Canis lupus familiaris OX=9615 GN=GNB2 PE=4 SV=1	C_familiaris	12	321	5	0.218	0.610941	1	1	1	1	1	1	1	1	1	1	1	1	1	1	1	1	1	1	1	1	1	1	1	1	1	1	1	1	1	1	1	1	1	1	1	1	1	1	1	1	1
High	E2RCP9	26S proteasome non-ATPase regulatory subunit 2 OS=Canis lupus familiaris OX=9615 GN=PSMD2 PE=3 SV=1	C_familiaris	15	62	15	0.237	0.704492	1	1	1	1	1	1	1	1	1	1	1	1	1	1	1	1	1	1	1	1	1	1	1	1	1	1	1	1	1	1	1	1	1	1	1	1	1	1	1	1	1
High	A0A5F4C290	Septin 9 OS=Canis lupus familiaris OX=9615 GN=SEPTIN9 PE=4 SV=1	C_familiaris	7	17	7	3.505	0.796189	1	1	1	1	1	1	1	1	1	1	1	1	1	1	1	1	1	1	1	1	1	1	1	1	1	1	1	1	1	1	1	1	1	1	1	1	1	1	1	1	1
High	E2REF3	Urea transporter OS=Canis lupus familiaris OX=9615 GN=SLC14A1 PE=3 SV=3	C_familiaris	5	69	4	0.288	0.796929	1	1	1	1	1	1	1	1	1	1	1	1	1	1	1	1	1	1	1	1	1	1	1	1	1	1	1	1	1	1	1	1	1	1	1	1	1	1	1	1	1
High	A0A5F4DJ85	Rho GDP dissociation inhibitor alpha OS=Canis lupus familiaris OX=9615 GN=ARHGDIA PE=4 SV=1	C_familiaris	7	99	7	0.32	0.847287	1	1	1	1	1	1	1	1	1	1	1	1	1	1	1	1	1	1	1	1	1	1	1	1	1	1	1	1	1	1	1	1	1	1	1	1	1	1	1	1	1
High	E2RJ26	Proteasome 26S subunit, non-ATPase 11 OS=Canis lupus familiaris OX=9615 GN=PSMD11 PE=4 SV=2	C_familiaris	14	55	14	0.305	0.850672	1	1	1	1	1	1	1	1	1	1	1	1	1	1	1	1	1	1	1	1	1	1	1	1	1	1	1	1	1	1	1	1	1	1	1	1	1	1	1	1	1
High	G1K288	Ras-related protein Rab-2A OS=Canis lupus familiaris OX=9615 GN=RAB2A PE=4 SV=2	C_familiaris	5	23	5	0.328	0.854406	1	1	1	1	1	1	1	1	1	1	1	1	1	1	1	1	1	1	1	1	1	1	1	1	1	1	1	1	1	1	1	1	1	1	1	1	1	1	1	1	1
High	A0A5F4D1L1	Solute carrier family 44 member 1 OS=Canis lupus familiaris OX=9615 GN=SLC44A1 PE=4 SV=1	C_familiaris	13	62	13	0.373	0.897378	1	1	1	1	1	1	1	1	1	1	1	1	1	1	1	1	1	1	1	1	1	1	1	1	1	1	1	1	1	1	1	1	1	1	1	1	1	1	1	1	1
High	E2R9D7	DnaJ heat shock protein family (Hsp40) member B1 OS=Canis lupus familiaris OX=9615 GN=DNAJB1 PE=4 SV=1	C_familiaris	7	34	7	0.366	0.910769	1	1	1	1	1	1	1	1	1	1	1	1	1	1	1	1	1	1	1	1	1	1	1	1	1	1	1	1	1	1	1	1	1	1	1	1	1	1	1	1	1
High	J9NX73	Uncharacterized protein OS=Canis lupus familiaris OX=9615 GN=RPIA PE=3 SV=1	C_familiaris	11	62	11	0.426	0.933819	1	1	1	1	1	1	1	1	1	1	1	1	1	1	1	1	1	1	1	1	1	1	1	1	1	1	1	1	1	1	1	1	1	1	1	1	1	1	1	1	1
High	F1Q1Q0	Coronin OS=Canis lupus familiaris OX=9615 GN=CORO1C PE=3 SV=3	C_familiaris	9	64	9	1.66	0.938246	1	1	1	1	1	1	1	1	1	1	1	1	1	1	1	1	1	1	1	1	1	1	1	1	1	1	1	1	1	1	1	1	1	1	1	1	1	1	1	1	1
High	J9NYN2	Cysteine and glycine rich protein 1 OS=Canis lupus familiaris OX=9615 GN=CSRP1 PE=4 SV=1	C_familiaris	6	66	6	1.705	0.938246	1	1	1	1	1	1	1	1	1	1	1	1	1	1	1	1	1	1	1	1	1	1	1	1	1	1	1	1	1	1	1	1	1	1	1	1	1	1	1	1	1
High	L7N0I1	Uncharacterized protein OS=Canis lupus familiaris OX=9615 GN=MYL12B PE=4 SV=1	C_familiaris	10	168	4	1.674	0.938246	1	1	1	1	1	1	1	1	1	1	1	1	1	1	1	1	1	1	1	1	1	1	1	1	1	1	1	1	1	1	1	1	1	1	1	1	1	1	1	1	1
High	F6V0D8	Chaperonin containing TCP1 subunit 2 OS=Canis lupus familiaris OX=9615 GN=CCT2 PE=3 SV=2	C_familiaris	16	64	16	0.594	0.944788	1	1	1	1	1	1	1	1	1	1	1	1	1	1	1	1	1	1	1	1	1	1	1	1	1	1	1	1	1	1	1	1	1	1	1	1	1	1	1	1	1
High	F1PR87	Pleckstrin homology domain containing O2 OS=Canis lupus familiaris OX=9615 GN=PLEKHO2 PE=4 SV=2	C_familiaris	11	28	11	0.79	0.979433	1	1	1	1	1	1	1	1	1	1	1	1	1	1	1	1	1	1	1	1	1	1	1	1	1	1	1	1	1	1	1	1	1	1	1	1	1	1	1	1	1
High	G1K2D7	Coagulation factor IX OS=Canis lupus familiaris OX=9615 GN=F9 PE=3 SV=1	C_familiaris	5	66	5	1.155	0.979433	1	1	1	1	1	1	1	1	1	1	1	1	1	1	1	1	1	1	1	1	1	1	1	1	1	1	1	1	1	1	1	1	1	1	1	1	1	1	1	1	1
High	E2R516	Synaptosomal-associated protein OS=Canis lupus familiaris OX=9615 GN=SNAP23 PE=3 SV=1	C_familiaris	13	212	13	0.358	0.884543	1	1	1	1	1	1	Not Found	1	1	1	1	1	1	1	1	1	1	1	1	1	1	1	1	1	1	1	1	1	1	1	1	1	1	1	1	1	1	1	1	1	1
High	E2QW69	RAB5B, member RAS oncogene family OS=Canis lupus familiaris OX=9615 GN=RAB5B PE=4 SV=1	C_familiaris	7	105	4	0.395	0.933819	1	1	1	1	1	1	Not Found	1	1	1	1	1	1	1	1	1	1	1	1	1	1	1	1	1	1	1	1	1	1	1	1	1	1	1	1	1	1	1	1	1	1
High	J9P3M1	LIM and SH3 protein 1 OS=Canis lupus familiaris OX=9615 GN=LASP1 PE=4 SV=2	C_familiaris	4	60	4	1.704	0.938246	1	1	1	1	1	1	1	1	1	1	1	1	1	1	1	1	1	1	Not Found	1	1	1	1	1	1	1	1	1	1	1	1	1	1	1	1	1	1	1	1	1	1
High	A0A5F4DBN6	Glutathione-disulfide reductase OS=Canis lupus familiaris OX=9615 GN=GSR PE=4 SV=1	C_familiaris	3	27	3	1.866	0.938246	1	1	1	1	1	Not Found	1	1	1	1	1	1	1	1	1	1	1	1	1	1	1	1	1	1	1	1	1	1	1	1	1	1	1	1	1	1	1	1	1	1	1
High	A0A5F4C8U9	Uncharacterized protein OS=Canis lupus familiaris OX=9615 PE=4 SV=1	C_familiaris	5	109	2	1.014	0.996995	1	1	1	1	Not Found	1	1	1	1	1	1	1	1	1	1	1	1	1	1	1	1	1	1	1	1	1	1	1	1	1	1	1	1	1	1	1	1	1	1	1	1
High	F1PDQ4	Cytoplasmic FMR1-interacting protein OS=Canis lupus familiaris OX=9615 GN=CYFIP1 PE=3 SV=3	C_familiaris	7	14	3	4.004	0.677831	1	1	1	1	1	1	1	1	1	1	1	1	1	1	1	1	1	1	1	1	1	1	1	1	1	Not Found	1	1	1	1	1	1	1	1	1	1	1	1	1	1	Not Found
High	F1PS24	Collagen type II alpha 1 chain OS=Canis lupus familiaris OX=9615 GN=COL2A1 PE=4 SV=2	C_familiaris	2	19	2	0.703	0.953219	1	1	1	1	1	1	1	1	1	1	1	1	1	1	1	1	1	1	1	1	1	1	1	1	1	1	1	1	1	1	1	1	1	1	1	1	1	1	1	1	Not Found
High	A0A5F4CE39	Protein phosphatase, Mg2+/Mn2+ dependent 1B OS=Canis lupus familiaris OX=9615 GN=PPM1B PE=4 SV=1	C_familiaris	3	8	3	0.619	0.944788	Not Found	Not Found	Not Found	1	Not Found	Not Found	Not Found	1	1	1	1	1	1	1	1	1	1	1	1	1	1	1	1	1	1	1	1	1	1	1	1	1	1	1	1	1	1	1	1	1	1
High	J9P0D4	Ig-like domain-containing protein OS=Canis lupus familiaris OX=9615 PE=4 SV=2	C_familiaris	4	267	3	2	0.933819	1	1	1	1	1	1	1	1	1	Not Found	1	1	1	Not Found	Not Found	1	1	1	1	1	1	1	1	1	1	1	Not Found	1	1	1	1	1	1	1	1	1	1	1	Not Found	1	1
High	A0A5F4CNX1	AHNAK nucleoprotein OS=Canis lupus familiaris OX=9615 GN=AHNAK PE=4 SV=1	C_familiaris	6	13	6	1.215	0.979433	1	Not Found	1	Not Found	1	Not Found	1	1	1	1	1	1	1	1	1	1	Not Found	1	1	1	1	1	1	1	1	1	Not Found	1	1	1	1	1	1	1	1	Not Found	Not Found	1	1	1	1
High	A0A5F4BP76	Aldehyde dehydrogenase 9 family member A1 OS=Canis lupus familiaris OX=9615 GN=ALDH9A1 PE=4 SV=1	C_familiaris	2	5	2	1.191	0.987033	1	1	Not Found	1	Not Found	1	1	1	1	1	1	1	1	1	1	1	1	1	Not Found	Not Found	Not Found	1	1	Not Found	1	1	1	1	1	1	1	1	Not Found	Not Found	Not Found	Not Found	Not Found	Not Found	Not Found	Not Found	Not Found
High	Q2A652	G-protein coupled receptor OS=Canis lupus familiaris OX=9615 GN=PTGDR2 PE=2 SV=1	C_familiaris	2	3	2	1.099	0.953219	1	1	1	1	Not Found	Not Found	Not Found	1	1	1	Not Found	Not Found	Not Found	Not Found	Not Found	1	Not Found	Not Found	Not Found	Not Found	Not Found	1	Not Found	1	Not Found	Not Found	Not Found	Not Found	1	Not Found	1	Not Found	Not Found	Not Found	1	Not Found	Not Found	Not Found	1	Not Found	1
High	F1PNH6	Selenium binding protein 1 OS=Canis lupus familiaris OX=9615 GN=SELENBP1 PE=4 SV=3	C_familiaris	19	146	19	0.101	0.159332	1	1	1	1	1	1	1	1	1	1	1	1	1	1	1	1	1	1	1	1	1	1	1	1	1	1	1	1	1	1	1	1	1	1	1	1	1	1	1	1	1
High	F1P9P5	Ubiquitin carboxyl-terminal hydrolase OS=Canis lupus familiaris OX=9615 GN=USP5 PE=3 SV=3	C_familiaris	13	64	13	0.264	0.736041	1	1	1	1	1	1	1	1	1	1	1	1	1	1	1	1	1	1	1	1	1	1	1	1	1	1	1	1	1	1	1	1	1	1	1	1	1	1	1	1	1
High	A0A5F4CJ02	Esterase D OS=Canis lupus familiaris OX=9615 GN=ESD PE=4 SV=1	C_familiaris	8	25	8	0.304	0.847605	1	1	1	1	1	1	1	1	1	1	1	1	1	1	1	1	1	1	1	1	1	1	1	1	1	1	1	1	1	1	1	1	1	1	1	1	1	1	1	1	1
High	F1P933	Angiopoietin-1 OS=Canis lupus familiaris OX=9615 GN=ANGPT1 PE=4 SV=3	C_familiaris	9	18	9	0.385	0.930865	1	1	1	1	1	1	1	1	1	1	1	1	1	1	1	1	1	1	1	1	1	1	1	1	1	1	1	1	1	1	1	1	1	1	1	1	1	1	1	1	1
High	A0A5F4DBF8	ATPase H+ transporting V0 subunit a1 OS=Canis lupus familiaris OX=9615 GN=ATP6V0A1 PE=4 SV=1	C_familiaris	13	91	13	0.443	0.933819	1	1	1	1	1	1	1	1	1	1	1	1	1	1	1	1	1	1	1	1	1	1	1	1	1	1	1	1	1	1	1	1	1	1	1	1	1	1	1	1	1
High	E2RPB8	C-type lectin domain family 3 member B OS=Canis lupus familiaris OX=9615 GN=CLEC3B PE=4 SV=3	C_familiaris	5	238	3	1.884	0.933819	1	1	1	1	1	1	1	1	1	1	1	1	1	1	1	1	1	1	1	1	1	1	1	1	1	1	1	1	1	1	1	1	1	1	1	1	1	1	1	1	1
High	A0A5F4C8R9	Uncharacterized protein OS=Canis lupus familiaris OX=9615 GN=PSMC6 PE=4 SV=1	C_familiaris	11	53	11	0.6	0.938246	1	1	1	1	1	1	1	1	1	1	1	1	1	1	1	1	1	1	1	1	1	1	1	1	1	1	1	1	1	1	1	1	1	1	1	1	1	1	1	1	1
High	E2RFJ3	Solute carrier family 40 protein OS=Canis lupus familiaris OX=9615 GN=SLC40A1 PE=3 SV=2	C_familiaris	2	8	2	0.618	0.944788	1	1	1	1	1	1	1	1	1	1	1	1	1	1	1	1	1	1	1	1	1	1	1	1	1	1	1	1	1	1	1	1	1	1	1	1	1	1	1	1	1
High	A0A5F4BQI1	Actin related protein 2/3 complex subunit 4 OS=Canis lupus familiaris OX=9615 GN=ARPC4 PE=4 SV=1	C_familiaris	6	42	6	1.419	0.952597	1	1	1	1	1	1	1	1	1	1	1	1	1	1	1	1	1	1	1	1	1	1	1	1	1	1	1	1	1	1	1	1	1	1	1	1	1	1	1	1	1
High	E2R574	Uncharacterized protein OS=Canis lupus familiaris OX=9615 GN=EEF1G PE=4 SV=1	C_familiaris	10	41	10	1.363	0.953219	1	1	1	1	1	1	1	1	1	1	1	1	1	1	1	1	1	1	1	1	1	1	1	1	1	1	1	1	1	1	1	1	1	1	1	1	1	1	1	1	1
High	E2R0A0	Peroxiredoxin like 2A OS=Canis lupus familiaris OX=9615 GN=PRXL2A PE=4 SV=3	C_familiaris	4	10	4	0.788	0.961582	1	1	1	1	1	1	1	1	1	1	1	1	1	1	1	1	1	1	1	1	1	1	1	1	1	1	1	1	1	1	1	1	1	1	1	1	1	1	1	1	1
High	Q2TFN9	Heat shock 70 kDa protein 4 OS=Canis lupus familiaris OX=9615 GN=HSPA4 PE=1 SV=1	C_familiaris	16	85	16	0.722	0.963645	1	1	1	1	1	1	1	1	1	1	1	1	1	1	1	1	1	1	1	1	1	1	1	1	1	1	1	1	1	1	1	1	1	1	1	1	1	1	1	1	1
High	F1P914	Uncharacterized protein OS=Canis lupus familiaris OX=9615 GN=MVP PE=4 SV=3	C_familiaris	9	19	9	1.284	0.96883	1	1	1	1	1	1	1	1	1	1	1	1	1	1	1	1	1	1	1	1	1	1	1	1	1	1	1	1	1	1	1	1	1	1	1	1	1	1	1	1	1
High	A0A5F4BSL9	Uncharacterized protein OS=Canis lupus familiaris OX=9615 PE=4 SV=1	C_familiaris	3	86	2	1.27	0.96883	1	1	1	1	1	1	1	1	1	1	1	1	1	1	1	1	1	1	1	1	1	1	1	1	1	1	1	1	1	1	1	1	1	1	1	1	1	1	1	1	1
High	E2R5Q1	Calponin OS=Canis lupus familiaris OX=9615 GN=CNN2 PE=3 SV=2	C_familiaris	10	83	10	1.129	0.987033	1	1	1	1	1	1	1	1	1	1	1	1	1	1	1	1	1	1	1	1	1	1	1	1	1	1	1	1	1	1	1	1	1	1	1	1	1	1	1	1	1
High	E2RB79	T-complex protein 1 subunit gamma OS=Canis lupus familiaris OX=9615 GN=CCT3 PE=3 SV=3	C_familiaris	7	22	7	0.866	0.995619	1	1	1	1	1	1	1	1	1	1	1	1	1	1	1	1	1	1	1	1	1	1	1	1	1	1	1	1	1	1	1	1	1	1	1	1	1	1	1	1	1
High	E2RAK7	Apolipoprotein A-II OS=Canis lupus familiaris OX=9615 GN=APOA2 PE=1 SV=2	C_familiaris	4	28	4	1.035	0.996995	1	1	1	1	1	1	1	1	1	1	1	1	1	1	1	1	1	1	1	1	1	1	1	1	1	1	1	1	1	1	1	1	1	1	1	1	1	1	1	1	1
High	A0A5F4CPQ6	Chaperonin containing TCP1 subunit 8 OS=Canis lupus familiaris OX=9615 GN=CCT8 PE=4 SV=1	C_familiaris	12	47	12	0.944	0.997778	1	1	1	1	1	1	1	1	1	1	1	1	1	1	1	1	1	1	1	1	1	1	1	1	1	1	1	1	1	1	1	1	1	1	1	1	1	1	1	1	1
High	A0A5F4D0L8	Septin 6 OS=Canis lupus familiaris OX=9615 GN=SEPTIN6 PE=4 SV=1	C_familiaris	10	101	6	1.873	0.933819	1	Not Found	1	1	Not Found	1	1	1	1	1	1	1	1	1	1	1	1	1	1	1	1	1	1	1	1	1	1	1	1	1	1	1	1	1	1	1	1	1	1	1	1
High	E2QZQ6	Copine 3 OS=Canis lupus familiaris OX=9615 GN=CPNE3 PE=4 SV=2	C_familiaris	11	28	10	0.928	0.995619	1	Not Found	1	1	1	1	1	1	1	1	1	1	1	1	1	1	1	1	1	1	1	Not Found	1	Not Found	1	1	1	1	1	1	1	1	1	1	1	1	1	1	1	1	1
High	E2RLY5	Leucine aminopeptidase 3 OS=Canis lupus familiaris OX=9615 GN=LAP3 PE=3 SV=2	C_familiaris	8	18	8	1.813	0.938246	Not Found	Not Found	1	1	Not Found	1	1	1	1	1	1	1	1	1	1	1	1	1	1	1	1	1	1	1	1	1	1	1	1	1	1	1	1	1	1	1	1	1	1	Not Found	1
High	A0A5F4D2Z7	Casein kinase 1 gamma 1 OS=Canis lupus familiaris OX=9615 GN=CSNK1G1 PE=4 SV=1	C_familiaris	5	18	5	0.946	0.995619	1	1	1	1	Not Found	Not Found	Not Found	1	1	1	1	1	1	Not Found	1	1	1	1	1	1	1	Not Found	1	1	1	1	1	1	1	1	1	1	1	1	1	1	1	1	1	1	1
High	E2RIU2	Charged multivesicular body protein 2A OS=Canis lupus familiaris OX=9615 GN=CHMP2A PE=4 SV=2	C_familiaris	3	8	3	2.107	0.933819	Not Found	1	1	1	1	1	1	1	1	1	1	1	1	1	1	1	1	1	1	1	1	1	1	1	1	1	1	1	1	1	1	1	1	1	1	1	1	1	1	1	Not Found
High	H9KUV5	Pyruvate kinase OS=Canis lupus familiaris OX=9615 GN=PKLR PE=3 SV=1	C_familiaris	4	42	3	1.34	0.953219	Not Found	Not Found	1	1	Not Found	Not Found	1	1	1	1	1	1	Not Found	1	Not Found	1	1	1	1	1	1	1	1	1	1	1	1	1	1	1	1	1	1	1	1	1	1	1	1	1	1
High	F1PDJ7	Ig-like domain-containing protein OS=Canis lupus familiaris OX=9615 GN=AZGP1 PE=3 SV=2	C_familiaris	3	16	3	0.96	0.995619	1	1	1	1	1	1	1	Not Found	Not Found	1	1	Not Found	1	1	1	1	1	1	1	Not Found	1	1	1	1	1	1	1	1	1	1	1	1	1	1	1	1	1	1	1	1	Not Found
High	J9NXC6	Eukaryotic translation elongation factor 1 beta 2 OS=Canis lupus familiaris OX=9615 GN=EEF1B2 PE=4 SV=2	C_familiaris	2	5	2	0.405	0.910769	1	1	1	1	Not Found	Not Found	Not Found	1	1	1	1	1	1	1	1	1	1	1	1	1	1	Not Found	Not Found	Not Found	1	1	1	1	Not Found	1	1	1	1	Not Found	1	1	1	1	1	1	1
High	A0A5F4CLF7	Calmodulin 1 OS=Canis lupus familiaris OX=9615 GN=CALM1 PE=4 SV=1	C_familiaris	2	7	2	2.049	0.922889	1	1	1	1	1	Not Found	1	1	1	1	1	1	1	Not Found	1	1	Not Found	1	1	1	1	Not Found	1	Not Found	1	1	1	Not Found	1	1	1	1	1	1	Not Found	1	Not Found	Not Found	Not Found	Not Found	1
High	J9NVF6	Uncharacterized protein OS=Canis lupus familiaris OX=9615 GN=CEACAM28 PE=4 SV=1	C_familiaris	4	10	4	3.747	0.762585	1	1	1	Not Found	1	1	Not Found	1	Not Found	1	1	Not Found	Not Found	Not Found	Not Found	Not Found	1	1	Not Found	1	Not Found	Not Found	Not Found	Not Found	1	1	1	Not Found	1	1	Not Found	Not Found	1	Not Found	1	Not Found	Not Found	1	1	1	1
High	A0A5F4DD71	Adhesion regulating molecule 1 OS=Canis lupus familiaris OX=9615 GN=ADRM1 PE=4 SV=1	C_familiaris	2	4	2	0.475	0.933819	Not Found	1	Not Found	Not Found	Not Found	Not Found	Not Found	1	Not Found	Not Found	1	1	1	1	1	1	Not Found	1	Not Found	Not Found	1	Not Found	Not Found	Not Found	Not Found	Not Found	Not Found	Not Found	Not Found	Not Found	1	1	1	1	Not Found	Not Found	1	Not Found	1	1	Not Found
High	F1PU24	Uncharacterized protein OS=Canis lupus familiaris OX=9615 GN=LOC102153864 PE=4 SV=3	C_familiaris	2	6	2	1.892	0.935358	Not Found	Not Found	Not Found	1	Not Found	Not Found	Not Found	1	1	Not Found	1	1	Not Found	1	1	1	1	1	Not Found	Not Found	Not Found	Not Found	Not Found	Not Found	Not Found	Not Found	Not Found	Not Found	Not Found	Not Found	1	Not Found	1	Not Found	1	Not Found	Not Found	Not Found	Not Found	Not Found	Not Found
High	F1PV45	Titin OS=Canis lupus familiaris OX=9615 GN=TTN PE=4 SV=3	C_familiaris	2	2	2			Not Found	Not Found	Not Found	Not Found	Not Found	Not Found	Not Found	Not Found	Not Found	Not Found	Not Found	Not Found	Not Found	Not Found	Not Found	Not Found	Not Found	Not Found	Not Found	Not Found	Not Found	Not Found	Not Found	Not Found	Not Found	Not Found	Not Found	Not Found	Not Found	Not Found	Not Found	Not Found	Not Found	Not Found	Not Found	Not Found	Not Found	Not Found	Not Found	Not Found	Not Found
High	P51147	Ras-related protein Rab-5C OS=Canis lupus familiaris OX=9615 GN=RAB5C PE=2 SV=1	C_familiaris	10	195	7	0.13	0.285959	1	1	1	1	1	1	1	1	1	1	1	1	1	1	1	1	1	1	1	1	1	1	1	1	1	1	1	1	1	1	1	1	1	1	1	1	1	1	1	1	1
High	F1PKV2	Coactivator associated arginine methyltransferase 1 OS=Canis lupus familiaris OX=9615 GN=CARM1 PE=3 SV=3	C_familiaris	11	67	11	0.124	0.304762	1	1	1	1	1	1	1	1	1	1	1	1	1	1	1	1	1	1	1	1	1	1	1	1	1	1	1	1	1	1	1	1	1	1	1	1	1	1	1	1	1
High	A0A5F4CZ37	Solute carrier family 16 member 7 OS=Canis lupus familiaris OX=9615 GN=SLC16A7 PE=4 SV=1	C_familiaris	7	157	7	0.153	0.386173	1	1	1	1	1	1	1	1	1	1	1	1	1	1	1	1	1	1	1	1	1	1	1	1	1	1	1	1	1	1	1	1	1	1	1	1	1	1	1	1	1
High	F1PKR0	Uncharacterized protein OS=Canis lupus familiaris OX=9615 GN=SDCBP PE=4 SV=3	C_familiaris	8	87	8	0.212	0.640752	1	1	1	1	1	1	1	1	1	1	1	1	1	1	1	1	1	1	1	1	1	1	1	1	1	1	1	1	1	1	1	1	1	1	1	1	1	1	1	1	1
High	A0A5F4C9D6	Dehydrogenase/reductase 13 OS=Canis lupus familiaris OX=9615 GN=DHRS13 PE=4 SV=1	C_familiaris	14	67	14	0.227	0.641755	1	1	1	1	1	1	1	1	1	1	1	1	1	1	1	1	1	1	1	1	1	1	1	1	1	1	1	1	1	1	1	1	1	1	1	1	1	1	1	1	1
High	E2QSE3	Flotillin OS=Canis lupus familiaris OX=9615 GN=FLOT1 PE=3 SV=1	C_familiaris	16	97	16	0.25	0.702189	1	1	1	1	1	1	1	1	1	1	1	1	1	1	1	1	1	1	1	1	1	1	1	1	1	1	1	1	1	1	1	1	1	1	1	1	1	1	1	1	1
High	E2RM61	Proteasome 26S subunit, ATPase 5 OS=Canis lupus familiaris OX=9615 GN=PSMC5 PE=4 SV=3	C_familiaris	13	56	12	0.33	0.880036	1	1	1	1	1	1	1	1	1	1	1	1	1	1	1	1	1	1	1	1	1	1	1	1	1	1	1	1	1	1	1	1	1	1	1	1	1	1	1	1	1
High	J9P3W8	Nicotinate phosphoribosyltransferase OS=Canis lupus familiaris OX=9615 GN=NAPRT PE=3 SV=2	C_familiaris	8	52	8	0.443	0.933819	1	1	1	1	1	1	1	1	1	1	1	1	1	1	1	1	1	1	1	1	1	1	1	1	1	1	1	1	1	1	1	1	1	1	1	1	1	1	1	1	1
High	F1PKI4	Chloride intracellular channel protein OS=Canis lupus familiaris OX=9615 GN=CLIC1 PE=3 SV=2	C_familiaris	7	65	7	0.521	0.935358	1	1	1	1	1	1	1	1	1	1	1	1	1	1	1	1	1	1	1	1	1	1	1	1	1	1	1	1	1	1	1	1	1	1	1	1	1	1	1	1	1
High	F1PI01	Kell metallo-endopeptidase OS=Canis lupus familiaris OX=9615 GN=KEL PE=4 SV=3	C_familiaris	17	66	17	0.611	0.952439	1	1	1	1	1	1	1	1	1	1	1	1	1	1	1	1	1	1	1	1	1	1	1	1	1	1	1	1	1	1	1	1	1	1	1	1	1	1	1	1	1
High	E2RCI8	Annexin OS=Canis lupus familiaris OX=9615 GN=ANXA6 PE=3 SV=3	C_familiaris	19	52	19	0.728	0.953219	1	1	1	1	1	1	1	1	1	1	1	1	1	1	1	1	1	1	1	1	1	1	1	1	1	1	1	1	1	1	1	1	1	1	1	1	1	1	1	1	1
High	E2RT65	Phosphoglycerate mutase OS=Canis lupus familiaris OX=9615 GN=PGAM1 PE=3 SV=2	C_familiaris	9	77	9	0.721	0.953219	1	1	1	1	1	1	1	1	1	1	1	1	1	1	1	1	1	1	1	1	1	1	1	1	1	1	1	1	1	1	1	1	1	1	1	1	1	1	1	1	1
High	E2RRA1	Protein kinase cAMP-dependent type II regulatory subunit beta OS=Canis lupus familiaris OX=9615 GN=PRKAR2B PE=4 SV=1	C_familiaris	7	25	7	0.79	0.970978	1	1	1	1	1	1	1	1	1	1	1	1	1	1	1	1	1	1	1	1	1	1	1	1	1	1	1	1	1	1	1	1	1	1	1	1	1	1	1	1	1
High	F1PP71	F11 receptor OS=Canis lupus familiaris OX=9615 GN=F11R PE=4 SV=3	C_familiaris	8	75	8	0.924	0.995619	1	1	1	1	1	1	1	1	1	1	1	1	1	1	1	1	1	1	1	1	1	1	1	1	1	1	1	1	1	1	1	1	1	1	1	1	1	1	1	1	1
High	J9P7X2	Ig-like domain-containing protein OS=Canis lupus familiaris OX=9615 GN=THY1 PE=4 SV=1	C_familiaris	5	35	5	1.027	0.995619	1	1	1	1	1	1	1	1	1	1	1	1	1	1	1	1	1	1	1	1	1	1	1	1	1	1	1	1	1	1	1	1	1	1	1	1	1	1	1	1	1
High	E2R0D2	Scavenger receptor cysteine rich family member with 5 domains OS=Canis lupus familiaris OX=9615 GN=SSC5D PE=4 SV=3	C_familiaris	7	53	7	0.941	0.997778	1	1	1	1	1	1	1	1	1	1	1	1	1	1	1	1	1	1	1	1	1	1	1	1	1	1	1	1	1	1	1	1	1	1	1	1	1	1	1	1	1
High	A0A5F4C080	Caldesmon 1 OS=Canis lupus familiaris OX=9615 GN=CALD1 PE=4 SV=1	C_familiaris	16	214	16	4.519	0.607742	1	1	1	1	Not Found	1	1	1	1	1	1	1	1	1	1	1	1	1	1	1	1	1	1	1	1	1	1	1	1	1	1	1	1	1	1	1	1	1	1	1	1
High	P60952	Cell division control protein 42 homolog OS=Canis lupus familiaris OX=9615 GN=CDC42 PE=2 SV=2	C_familiaris	8	83	7	0.3	0.823214	1	1	1	1	1	1	Not Found	1	1	1	1	1	1	1	1	1	1	1	1	1	1	1	1	1	1	1	1	1	1	1	1	1	1	1	1	1	1	1	1	1	1
High	A0A5F4CUQ1	Tropomyosin 1 OS=Canis lupus familiaris OX=9615 GN=TPM1 PE=4 SV=1	C_familiaris	17	223	7	2.808	0.880036	1	1	1	1	1	1	1	1	1	1	1	1	1	1	1	1	1	1	1	1	1	1	1	1	1	1	1	1	1	1	1	1	1	1	1	Not Found	1	1	1	1	1
High	A0A5F4CPW0	Tyrosine 3-monooxygenase/tryptophan 5-monooxygenase activation protein epsilon OS=Canis lupus familiaris OX=9615 GN=YWHAE PE=4 SV=1	C_familiaris	7	102	5	0.605	0.938246	1	1	1	1	1	Not Found	1	1	1	1	1	1	1	1	1	1	1	1	1	1	1	1	1	1	1	1	1	1	1	1	1	1	1	1	1	1	1	1	1	1	1
High	E2RNG4	Desmoplakin OS=Canis lupus familiaris OX=9615 GN=DSP PE=4 SV=3	C_familiaris	14	35	14	0.659	0.952848	1	1	1	1	1	1	1	1	Not Found	1	1	1	1	1	1	1	1	1	1	1	1	1	1	1	1	1	1	1	1	1	1	1	1	1	1	1	1	1	1	1	1
High	A0A5F4C1B3	Transgelin 2 OS=Canis lupus familiaris OX=9615 GN=TAGLN2 PE=4 SV=1	C_familiaris	6	27	6	1.587	0.952439	1	1	1	1	Not Found	1	Not Found	1	1	1	1	1	1	1	1	1	1	1	1	1	1	1	1	1	1	1	1	1	1	1	1	1	1	1	1	1	1	1	1	1	1
High	A0A5F4C0Q1	Syntaxin 7 OS=Canis lupus familiaris OX=9615 GN=STX7 PE=4 SV=1	C_familiaris	4	22	4	1.074	0.99054	1	1	1	1	1	Not Found	1	1	1	1	1	1	1	1	1	1	1	1	1	1	1	1	1	1	1	1	1	1	1	1	1	1	1	Not Found	1	1	1	1	1	1	1
High	A0A5F4D6P2	Vesicle associated membrane protein 7 OS=Canis lupus familiaris OX=9615 GN=VAMP7 PE=4 SV=1	C_familiaris	5	13	5	0.975	0.995619	1	Not Found	1	1	1	1	1	1	1	1	1	1	1	1	1	1	1	1	1	1	1	1	1	1	1	1	1	1	1	1	1	1	1	1	1	1	1	1	1	1	1
High	J9NX00	Thyroglobulin OS=Canis lupus familiaris OX=9615 GN=TG PE=4 SV=2	C_familiaris	22	43	22	0.986	0.997778	1	1	1	Not Found	Not Found	1	1	1	1	1	1	1	1	1	1	1	1	1	1	1	1	1	1	1	1	1	1	1	1	1	1	1	1	1	1	1	1	1	1	1	1
High	A0A5F4CT58	Thioredoxin reductase 2 OS=Canis lupus familiaris OX=9615 GN=TXNRD2 PE=4 SV=1	C_familiaris	4	16	4	0.514	0.933819	1	1	1	Not Found	Not Found	1	Not Found	1	1	1	1	1	1	1	1	1	1	1	1	1	1	1	1	1	1	1	1	1	1	1	1	1	1	1	1	1	1	1	1	1	1
High	F1Q2J4	Notch receptor 3 OS=Canis lupus familiaris OX=9615 GN=NOTCH3 PE=4 SV=3	C_familiaris	9	63	9	0.582	0.940647	1	1	Not Found	Not Found	Not Found	1	Not Found	1	1	1	1	1	1	1	1	1	1	1	1	1	1	1	1	1	1	1	1	1	1	1	1	1	1	1	1	1	1	1	1	1	Not Found
High	E2R034	Molybdopterin molybdenumtransferase OS=Canis lupus familiaris OX=9615 GN=GPHN PE=3 SV=2	C_familiaris	4	6	4	1.252	0.969805	1	1	Not Found	1	1	1	1	1	1	1	1	1	1	1	1	1	1	1	1	1	1	1	1	1	1	1	1	1	1	1	1	1	Not Found	Not Found	1	1	1	1	1	1	Not Found
High	F6V5M4	Nuclear distribution C, dynein complex regulator OS=Canis lupus familiaris OX=9615 GN=NUDC PE=4 SV=1	C_familiaris	2	10	2	2.916	0.852724	1	1	1	1	1	1	Not Found	1	1	1	1	1	1	1	1	1	1	1	1	1	1	Not Found	1	Not Found	1	Not Found	Not Found	1	1	Not Found	1	1	1	1	1	1	1	1	1	1	Not Found
High	J9P3J4	Uncharacterized protein OS=Canis lupus familiaris OX=9615 GN=SLC29A1 PE=4 SV=2	C_familiaris	2	12	2	2.253	0.933819	1	1	1	1	1	1	Not Found	1	1	1	1	1	1	1	1	1	1	1	Not Found	Not Found	Not Found	Not Found	Not Found	Not Found	1	1	1	1	1	1	1	1	1	1	1	Not Found	1	Not Found	Not Found	1	1
High	A0A5F4D8P8	Isocitrate dehydrogenase (NADP(+)) 2, mitochondrial OS=Canis lupus familiaris OX=9615 GN=IDH2 PE=4 SV=1	C_familiaris	3	19	3	6.194	0.408021	1	1	1	1	Not Found	Not Found	1	1	1	1	1	1	1	1	1	1	1	1	1	1	Not Found	1	1	1	Not Found	1	Not Found	1	1	1	Not Found	Not Found	Not Found	Not Found	Not Found	Not Found	Not Found	Not Found	1	1	1
High	F1PW12	Coproporphyrinogen oxidase OS=Canis lupus familiaris OX=9615 GN=CPOX PE=4 SV=3	C_familiaris	3	8	3	0.634	0.952848	1	1	1	1	Not Found	Not Found	1	1	1	1	Not Found	Not Found	1	1	1	1	1	1	Not Found	1	Not Found	1	1	1	1	Not Found	Not Found	1	1	1	1	1	1	1	1	1	1	1	Not Found	Not Found	1
High	F1Q2F7	Collagen type VI alpha 5 chain OS=Canis lupus familiaris OX=9615 GN=COL6A5 PE=4 SV=3	C_familiaris	2	2	2	1.572	0.938246	1	Not Found	Not Found	1	1	1	1	Not Found	1	Not Found	Not Found	Not Found	1	1	1	1	Not Found	Not Found	Not Found	Not Found	Not Found	Not Found	Not Found	Not Found	1	1	1	1	1	1	1	1	1	1	1	1	Not Found	1	Not Found	1	Not Found
High	E2R9Y4	Guanylate binding protein family member 6 OS=Canis lupus familiaris OX=9615 GN=GBP6 PE=4 SV=3	C_familiaris	3	5	3	0.586	0.938246	1	1	1	1	1	1	1	1	Not Found	Not Found	Not Found	1	Not Found	Not Found	Not Found	Not Found	Not Found	Not Found	Not Found	Not Found	Not Found	Not Found	Not Found	Not Found	1	Not Found	Not Found	1	Not Found	Not Found	Not Found	Not Found	Not Found	Not Found	Not Found	Not Found	Not Found	Not Found	Not Found	Not Found	Not Found
High	A0A5F4DER9	Aquaporin-1 OS=Canis lupus familiaris OX=9615 GN=AQP1 PE=4 SV=1	C_familiaris	4	217	4	0.058	0.0367217	1	1	1	1	1	1	1	1	1	1	1	1	1	1	1	1	1	1	1	1	1	1	1	1	1	1	1	1	1	1	1	1	1	1	1	1	1	1	1	1	1
High	P62825	GTP-binding nuclear protein Ran OS=Canis lupus familiaris OX=9615 GN=RAN PE=1 SV=3	C_familiaris	7	104	7	0.132	0.295664	1	1	1	1	1	1	1	1	1	1	1	1	1	1	1	1	1	1	1	1	1	1	1	1	1	1	1	1	1	1	1	1	1	1	1	1	1	1	1	1	1
High	F2Z4Q7	Serpin family F member 1 OS=Canis lupus familiaris OX=9615 GN=SERPINF1 PE=3 SV=1	C_familiaris	14	200	14	0.179	0.480118	1	1	1	1	1	1	1	1	1	1	1	1	1	1	1	1	1	1	1	1	1	1	1	1	1	1	1	1	1	1	1	1	1	1	1	1	1	1	1	1	1
High	F1P6D7	CD47 molecule OS=Canis lupus familiaris OX=9615 GN=CD47 PE=4 SV=3	C_familiaris	4	48	4	0.18	0.483904	1	1	1	1	1	1	1	1	1	1	1	1	1	1	1	1	1	1	1	1	1	1	1	1	1	1	1	1	1	1	1	1	1	1	1	1	1	1	1	1	1
High	E2R7E8	Acylaminoacyl-peptide hydrolase OS=Canis lupus familiaris OX=9615 GN=APEH PE=4 SV=2	C_familiaris	17	218	17	0.18	0.484717	1	1	1	1	1	1	1	1	1	1	1	1	1	1	1	1	1	1	1	1	1	1	1	1	1	1	1	1	1	1	1	1	1	1	1	1	1	1	1	1	1
High	A0A5F4C9L8	Programmed cell death 6 interacting protein OS=Canis lupus familiaris OX=9615 GN=PDCD6IP PE=4 SV=1	C_familiaris	29	234	29	0.185	0.497368	1	1	1	1	1	1	1	1	1	1	1	1	1	1	1	1	1	1	1	1	1	1	1	1	1	1	1	1	1	1	1	1	1	1	1	1	1	1	1	1	1
High	A0A5F4CVA0	Ubiquitin specific peptidase 14 OS=Canis lupus familiaris OX=9615 GN=USP14 PE=4 SV=1	C_familiaris	18	150	18	0.177	0.513304	1	1	1	1	1	1	1	1	1	1	1	1	1	1	1	1	1	1	1	1	1	1	1	1	1	1	1	1	1	1	1	1	1	1	1	1	1	1	1	1	1
High	F1PRH1	ATP binding cassette subfamily B member 6 OS=Canis lupus familiaris OX=9615 GN=ABCB6 PE=4 SV=2	C_familiaris	18	186	18	0.222	0.61915	1	1	1	1	1	1	1	1	1	1	1	1	1	1	1	1	1	1	1	1	1	1	1	1	1	1	1	1	1	1	1	1	1	1	1	1	1	1	1	1	1
High	J9NX46	Clathrin light chain A OS=Canis lupus familiaris OX=9615 GN=CLTA PE=3 SV=1	C_familiaris	5	147	5	0.262	0.734801	1	1	1	1	1	1	1	1	1	1	1	1	1	1	1	1	1	1	1	1	1	1	1	1	1	1	1	1	1	1	1	1	1	1	1	1	1	1	1	1	1
High	A0A5F4C451	Uncharacterized protein OS=Canis lupus familiaris OX=9615 PE=4 SV=1	C_familiaris	3	312	2	3.475	0.771334	1	1	1	1	1	1	1	1	1	1	1	1	1	1	1	1	1	1	1	1	1	1	1	1	1	1	1	1	1	1	1	1	1	1	1	1	1	1	1	1	1
High	F1PQM7	Tetraspanin OS=Canis lupus familiaris OX=9615 GN=CD9 PE=3 SV=3	C_familiaris	2	51	2	0.3	0.823214	1	1	1	1	1	1	1	1	1	1	1	1	1	1	1	1	1	1	1	1	1	1	1	1	1	1	1	1	1	1	1	1	1	1	1	1	1	1	1	1	1
High	F6XY66	Transforming protein RhoA OS=Canis lupus familiaris OX=9615 GN=RHOA PE=4 SV=1	C_familiaris	8	141	8	0.322	0.847605	1	1	1	1	1	1	1	1	1	1	1	1	1	1	1	1	1	1	1	1	1	1	1	1	1	1	1	1	1	1	1	1	1	1	1	1	1	1	1	1	1
High	F1PB66	Tetraspanin OS=Canis lupus familiaris OX=9615 GN=CD81 PE=3 SV=2	C_familiaris	2	43	2	0.321	0.862107	1	1	1	1	1	1	1	1	1	1	1	1	1	1	1	1	1	1	1	1	1	1	1	1	1	1	1	1	1	1	1	1	1	1	1	1	1	1	1	1	1
High	A0A5F4BRR8	Stomatin OS=Canis lupus familiaris OX=9615 GN=STOM PE=4 SV=1	C_familiaris	10	99	10	0.377	0.899167	1	1	1	1	1	1	1	1	1	1	1	1	1	1	1	1	1	1	1	1	1	1	1	1	1	1	1	1	1	1	1	1	1	1	1	1	1	1	1	1	1
High	F1Q2D2	Glutathione synthetase OS=Canis lupus familiaris OX=9615 GN=GSS PE=3 SV=1	C_familiaris	10	67	10	0.369	0.908124	1	1	1	1	1	1	1	1	1	1	1	1	1	1	1	1	1	1	1	1	1	1	1	1	1	1	1	1	1	1	1	1	1	1	1	1	1	1	1	1	1
High	A0A5F4BUK5	Integrin subunit alpha 2 OS=Canis lupus familiaris OX=9615 GN=ITGA2 PE=4 SV=1	C_familiaris	19	79	19	0.449	0.933819	1	1	1	1	1	1	1	1	1	1	1	1	1	1	1	1	1	1	1	1	1	1	1	1	1	1	1	1	1	1	1	1	1	1	1	1	1	1	1	1	1
High	F6XNH4	Methylenetetrahydrofolate dehydrogenase, cyclohydrolase and formyltetrahydrofolate synthetase 1 OS=Canis lupus familiaris OX=9615 GN=MTHFD1 PE=3 SV=2	C_familiaris	14	87	14	0.522	0.933819	1	1	1	1	1	1	1	1	1	1	1	1	1	1	1	1	1	1	1	1	1	1	1	1	1	1	1	1	1	1	1	1	1	1	1	1	1	1	1	1	1
High	E2QUL2	Vesicle associated membrane protein 8 OS=Canis lupus familiaris OX=9615 GN=VAMP8 PE=4 SV=3	C_familiaris	5	42	5	0.405	0.933819	1	1	1	1	1	1	1	1	1	1	1	1	1	1	1	1	1	1	1	1	1	1	1	1	1	1	1	1	1	1	1	1	1	1	1	1	1	1	1	1	1
High	A0A5F4DFV1	Apolipoprotein C-III OS=Canis lupus familiaris OX=9615 GN=APOC3 PE=4 SV=1	C_familiaris	4	161	4	2.259	0.933819	1	1	1	1	1	1	1	1	1	1	1	1	1	1	1	1	1	1	1	1	1	1	1	1	1	1	1	1	1	1	1	1	1	1	1	1	1	1	1	1	1
High	F1P7V6	Stress induced phosphoprotein 1 OS=Canis lupus familiaris OX=9615 GN=STIP1 PE=4 SV=3	C_familiaris	15	92	15	0.563	0.938246	1	1	1	1	1	1	1	1	1	1	1	1	1	1	1	1	1	1	1	1	1	1	1	1	1	1	1	1	1	1	1	1	1	1	1	1	1	1	1	1	1
High	A0A5F4D0H5	SRC proto-oncogene, non-receptor tyrosine kinase OS=Canis lupus familiaris OX=9615 GN=SRC PE=4 SV=1	C_familiaris	13	112	12	0.561	0.938246	1	1	1	1	1	1	1	1	1	1	1	1	1	1	1	1	1	1	1	1	1	1	1	1	1	1	1	1	1	1	1	1	1	1	1	1	1	1	1	1	1
High	F1P719	EH domain containing 4 OS=Canis lupus familiaris OX=9615 GN=EHD4 PE=3 SV=2	C_familiaris	13	90	8	1.543	0.944788	1	1	1	1	1	1	1	1	1	1	1	1	1	1	1	1	1	1	1	1	1	1	1	1	1	1	1	1	1	1	1	1	1	1	1	1	1	1	1	1	1
High	F1Q3V2	ATP-citrate synthase OS=Canis lupus familiaris OX=9615 GN=ACLY PE=3 SV=3	C_familiaris	11	26	11	0.674	0.952439	1	1	1	1	1	1	1	1	1	1	1	1	1	1	1	1	1	1	1	1	1	1	1	1	1	1	1	1	1	1	1	1	1	1	1	1	1	1	1	1	1
High	F6UYJ9	Calreticulin OS=Canis lupus familiaris OX=9615 GN=CALR PE=3 SV=2	C_familiaris	16	156	16	1.423	0.952731	1	1	1	1	1	1	1	1	1	1	1	1	1	1	1	1	1	1	1	1	1	1	1	1	1	1	1	1	1	1	1	1	1	1	1	1	1	1	1	1	1
High	F6X7V8	Erythroblast membrane associated protein OS=Canis lupus familiaris OX=9615 GN=ERMAP PE=4 SV=2	C_familiaris	11	69	11	0.663	0.952731	1	1	1	1	1	1	1	1	1	1	1	1	1	1	1	1	1	1	1	1	1	1	1	1	1	1	1	1	1	1	1	1	1	1	1	1	1	1	1	1	1
High	A0A5F4C3L7	Milk fat globule-EGF factor 8 protein OS=Canis lupus familiaris OX=9615 GN=MFGE8 PE=4 SV=1	C_familiaris	8	43	8	0.644	0.952731	1	1	1	1	1	1	1	1	1	1	1	1	1	1	1	1	1	1	1	1	1	1	1	1	1	1	1	1	1	1	1	1	1	1	1	1	1	1	1	1	1
High	A0A5F4CW76	ATP synthase subunit beta, mitochondrial OS=Canis lupus familiaris OX=9615 GN=ATP5F1B PE=4 SV=1	C_familiaris	17	109	17	1.364	0.953219	1	1	1	1	1	1	1	1	1	1	1	1	1	1	1	1	1	1	1	1	1	1	1	1	1	1	1	1	1	1	1	1	1	1	1	1	1	1	1	1	1
High	A0A5F4CAZ7	Sodium/potassium-transporting ATPase subunit alpha-1 OS=Canis lupus familiaris OX=9615 GN=ATP1A1 PE=4 SV=1	C_familiaris	16	76	16	0.701	0.953219	1	1	1	1	1	1	1	1	1	1	1	1	1	1	1	1	1	1	1	1	1	1	1	1	1	1	1	1	1	1	1	1	1	1	1	1	1	1	1	1	1
High	F1PHD0	Carboxyl ester lipase OS=Canis lupus familiaris OX=9615 GN=CEL PE=3 SV=2	C_familiaris	14	130	14	1.32	0.953219	1	1	1	1	1	1	1	1	1	1	1	1	1	1	1	1	1	1	1	1	1	1	1	1	1	1	1	1	1	1	1	1	1	1	1	1	1	1	1	1	1
High	E2QX19	Macrophage stimulating 1 OS=Canis lupus familiaris OX=9615 GN=MST1 PE=3 SV=3	C_familiaris	12	68	12	1.332	0.953219	1	1	1	1	1	1	1	1	1	1	1	1	1	1	1	1	1	1	1	1	1	1	1	1	1	1	1	1	1	1	1	1	1	1	1	1	1	1	1	1	1
High	A0A5F4D0B9	EGF containing fibulin extracellular matrix protein 1 OS=Canis lupus familiaris OX=9615 GN=EFEMP1 PE=4 SV=1	C_familiaris	9	61	9	0.715	0.957455	1	1	1	1	1	1	1	1	1	1	1	1	1	1	1	1	1	1	1	1	1	1	1	1	1	1	1	1	1	1	1	1	1	1	1	1	1	1	1	1	1
High	L7N0I7	Tubulin beta chain OS=Canis lupus familiaris OX=9615 GN=TUBB4B PE=3 SV=1	C_familiaris	23	589	5	1.302	0.961582	1	1	1	1	1	1	1	1	1	1	1	1	1	1	1	1	1	1	1	1	1	1	1	1	1	1	1	1	1	1	1	1	1	1	1	1	1	1	1	1	1
High	F1Q313	Homogentisate 1,2-dioxygenase OS=Canis lupus familiaris OX=9615 GN=HGD PE=4 SV=2	C_familiaris	13	47	13	0.81	0.969805	1	1	1	1	1	1	1	1	1	1	1	1	1	1	1	1	1	1	1	1	1	1	1	1	1	1	1	1	1	1	1	1	1	1	1	1	1	1	1	1	1
High	J9NTL5	Glycoprotein Ib platelet subunit beta OS=Canis lupus familiaris OX=9615 GN=GP1BB PE=4 SV=2	C_familiaris	6	93	6	1.25	0.969875	1	1	1	1	1	1	1	1	1	1	1	1	1	1	1	1	1	1	1	1	1	1	1	1	1	1	1	1	1	1	1	1	1	1	1	1	1	1	1	1	1
High	A4GT58	Cdc42 GTPase-activating protein OS=Canis lupus familiaris OX=9615 GN=ARHGAP1 PE=2 SV=1	C_familiaris	15	59	15	1.085	0.991543	1	1	1	1	1	1	1	1	1	1	1	1	1	1	1	1	1	1	1	1	1	1	1	1	1	1	1	1	1	1	1	1	1	1	1	1	1	1	1	1	1
High	F1PKL6	Ig-like domain-containing protein OS=Canis lupus familiaris OX=9615 PE=4 SV=3	C_familiaris	3	66	3	1.094	0.99259	1	1	1	1	1	1	1	1	1	1	1	1	1	1	1	1	1	1	1	1	1	1	1	1	1	1	1	1	1	1	1	1	1	1	1	1	1	1	1	1	1
High	E2QUU5	60 kDa heat shock protein, mitochondrial OS=Canis lupus familiaris OX=9615 GN=HSPD1 PE=3 SV=2	C_familiaris	19	145	19	0.967	0.997778	1	1	1	1	1	1	1	1	1	1	1	1	1	1	1	1	1	1	1	1	1	1	1	1	1	1	1	1	1	1	1	1	1	1	1	1	1	1	1	1	1
High	A0A5F4DGJ6	Parvin beta OS=Canis lupus familiaris OX=9615 GN=PARVB PE=4 SV=1	C_familiaris	10	165	10	0.973	0.997778	1	1	1	1	1	1	1	1	1	1	1	1	1	1	1	1	1	1	1	1	1	1	1	1	1	1	1	1	1	1	1	1	1	1	1	1	1	1	1	1	1
High	A0A5F4CY61	Uncharacterized protein OS=Canis lupus familiaris OX=9615 PE=4 SV=1	C_familiaris	4	42	3	0.968	0.997778	1	1	1	1	1	1	1	1	1	1	1	1	1	1	1	1	1	1	1	1	1	1	1	1	1	1	1	1	1	1	1	1	1	1	1	1	1	1	1	1	1
High	E2R857	Bleomycin hydrolase OS=Canis lupus familiaris OX=9615 GN=BLMH PE=3 SV=1	C_familiaris	6	32	6	0.339	0.884543	1	1	1	1	1	1	Not Found	1	1	1	1	1	1	1	1	1	1	1	1	1	1	1	1	1	1	1	1	1	1	1	1	1	1	1	1	1	1	1	1	1	1
High	F1PEN8	Carboxylic ester hydrolase OS=Canis lupus familiaris OX=9615 GN=BCHE PE=3 SV=1	C_familiaris	8	20	8	0.679	0.952731	1	1	1	1	1	1	1	1	1	1	1	1	1	1	1	1	1	1	1	1	1	1	1	1	1	1	1	1	1	1	1	1	1	1	1	1	1	1	1	1	1
High	A0A5F4CE41	Uncharacterized protein OS=Canis lupus familiaris OX=9615 PE=4 SV=1	C_familiaris	3	18	3	0.784	0.975161	1	1	1	1	1	1	1	1	1	1	1	1	1	1	1	1	1	1	1	1	1	1	1	1	1	1	1	1	1	1	1	1	1	1	1	1	1	1	1	1	1
High	A0A5F4BYG4	Spectrin alpha, non-erythrocytic 1 OS=Canis lupus familiaris OX=9615 GN=SPTAN1 PE=4 SV=1	C_familiaris	13	40	13	2.585	0.910769	1	1	1	1	1	1	Not Found	1	1	1	1	1	1	1	1	1	1	1	1	1	1	1	1	1	1	1	Not Found	1	1	1	1	1	1	1	1	1	1	1	1	1	1
High	E2RMC1	ST13 Hsp70 interacting protein OS=Canis lupus familiaris OX=9615 GN=ST13 PE=4 SV=3	C_familiaris	8	62	6	0.439	0.933819	1	1	1	1	Not Found	Not Found	1	1	1	1	1	1	1	1	1	1	1	1	1	1	1	1	1	1	1	1	1	1	1	1	1	1	1	1	1	1	1	1	1	1	1
High	P62999	Ras-related C3 botulinum toxin substrate 1 OS=Canis lupus familiaris OX=9615 GN=RAC1 PE=2 SV=1	C_familiaris	7	126	4	0.553	0.938246	1	1	1	1	1	Not Found	Not Found	1	1	1	1	1	1	1	1	1	1	1	1	1	1	1	1	1	1	1	1	1	1	1	1	1	1	1	1	1	1	1	1	1	1
High	E2RBB8	Tyrosine-protein kinase OS=Canis lupus familiaris OX=9615 GN=LYN PE=3 SV=3	C_familiaris	12	56	11	0.578	0.942668	1	1	1	1	Not Found	Not Found	1	1	1	1	1	1	1	1	1	1	1	1	1	1	1	1	1	1	1	1	1	1	1	1	1	1	1	1	1	1	1	1	1	1	1
High	A0A5F4DDF5	Mannose-6-phosphate receptor, cation dependent OS=Canis lupus familiaris OX=9615 GN=M6PR PE=4 SV=1	C_familiaris	5	25	5	0.657	0.95312	1	1	1	1	Not Found	1	Not Found	1	1	1	1	1	1	1	1	1	1	1	1	1	1	1	1	1	1	1	1	1	1	1	1	1	1	1	1	1	1	1	1	1	1
High	A0A5F4DJ87	Prolyl 4-hydroxylase subunit beta OS=Canis lupus familiaris OX=9615 GN=P4HB PE=4 SV=1	C_familiaris	6	33	6	1.326	0.953219	1	1	1	1	Not Found	1	Not Found	1	1	1	1	1	1	1	1	1	1	1	1	1	1	1	1	1	1	1	1	1	1	1	1	1	1	1	1	1	1	1	1	1	1
High	F1PEK5	Septin 2 OS=Canis lupus familiaris OX=9615 GN=SEPTIN2 PE=3 SV=3	C_familiaris	8	76	8	1.777	0.935358	1	1	1	1	Not Found	Not Found	Not Found	1	1	1	1	1	1	1	1	1	1	1	1	1	1	1	1	1	1	1	1	1	1	1	1	1	1	1	1	1	1	1	1	1	1
High	E2QY46	Dicarbonyl and L-xylulose reductase OS=Canis lupus familiaris OX=9615 GN=DCXR PE=4 SV=2	C_familiaris	10	39	10	0.976	0.995619	1	Not Found	1	1	1	1	1	1	1	1	1	1	1	1	1	1	1	1	1	1	1	1	1	Not Found	1	1	Not Found	1	1	1	1	1	1	1	1	1	1	1	1	1	1
High	F1PZH8	Bridging integrator 2 OS=Canis lupus familiaris OX=9615 GN=BIN2 PE=4 SV=3	C_familiaris	19	340	3	1.909	0.933819	Not Found	1	1	1	Not Found	Not Found	Not Found	1	1	1	1	1	1	1	1	1	1	1	1	1	1	1	1	1	1	1	1	1	1	1	1	1	1	1	1	1	1	1	1	1	1
High	F1PD34	Secreted phosphoprotein 2 OS=Canis lupus familiaris OX=9615 GN=SPP2 PE=4 SV=2	C_familiaris	5	26	5	0.956	0.995619	1	1	1	1	1	1	1	1	1	1	1	1	1	1	1	1	1	1	1	1	1	1	1	1	1	1	1	1	1	1	1	1	Not Found	Not Found	Not Found	1	1	1	1	1	1
High	A0A5F4BTS3	WASP actin nucleation promoting factor OS=Canis lupus familiaris OX=9615 GN=WAS PE=4 SV=1	C_familiaris	5	16	5	1.544	0.944788	1	1	1	1	Not Found	Not Found	Not Found	1	1	1	1	1	1	1	1	1	1	1	1	1	1	1	1	1	1	1	1	1	1	1	1	1	1	Not Found	Not Found	1	1	1	1	1	1
High	F1PS47	RAN binding protein 3 OS=Canis lupus familiaris OX=9615 GN=RANBP3 PE=4 SV=3	C_familiaris	6	24	6	1.289	0.955635	1	1	1	1	1	1	1	1	1	Not Found	1	Not Found	1	1	1	Not Found	Not Found	1	1	1	1	1	1	1	1	1	1	1	1	1	1	1	1	1	1	1	1	1	1	1	1
High	A0A5F4CKY1	A-kinase anchoring protein 12 OS=Canis lupus familiaris OX=9615 GN=AKAP12 PE=4 SV=1	C_familiaris	14	24	14	0.832	0.975161	1	1	1	1	1	1	1	1	1	1	1	1	1	1	1	1	1	1	1	1	1	Not Found	Not Found	Not Found	1	1	1	1	1	1	1	1	1	Not Found	1	1	1	1	1	1	1
High	A0A5F4DGH8	Eukaryotic translation initiation factor 3 subunit J OS=Canis lupus familiaris OX=9615 GN=EIF3J PE=4 SV=1	C_familiaris	5	20	5	1.505	0.944788	1	Not Found	1	1	1	1	1	1	1	1	1	1	1	1	1	1	1	1	1	1	1	1	1	1	1	1	Not Found	1	1	1	1	1	1	Not Found	Not Found	1	Not Found	1	1	1	1
High	J9PB28	Fibrinogen like 2 OS=Canis lupus familiaris OX=9615 GN=FGL2 PE=4 SV=1	C_familiaris	3	13	3	1.19	0.989534	Not Found	1	1	1	Not Found	Not Found	1	1	1	1	1	1	1	1	1	1	1	1	1	1	1	1	Not Found	Not Found	1	1	1	1	1	1	1	1	1	1	1	1	1	1	1	1	1
High	A0A5F4CC82	ADP ribosylation factor 4 OS=Canis lupus familiaris OX=9615 GN=ARF4 PE=4 SV=1	C_familiaris	5	68	3	0.575	0.940626	Not Found	Not Found	1	1	Not Found	Not Found	1	1	1	1	1	1	1	1	1	1	1	1	1	1	1	1	1	1	1	1	1	1	1	1	1	1	1	1	1	1	1	1	1	1	Not Found
High	F1P6E4	Thromboxane A synthase 1 OS=Canis lupus familiaris OX=9615 GN=TBXAS1 PE=3 SV=3	C_familiaris	7	13	7	0.857	0.979433	1	1	1	1	1	1	1	1	1	1	Not Found	Not Found	1	1	Not Found	1	1	1	1	Not Found	1	1	1	Not Found	1	Not Found	Not Found	Not Found	1	1	1	Not Found	1	1	1	1	1	1	1	1	1
High	F1PE67	AP-2 complex subunit alpha OS=Canis lupus familiaris OX=9615 GN=AP2A1 PE=3 SV=3	C_familiaris	2	4	2	0.996	0.997778	1	1	1	1	1	1	1	1	1	Not Found	1	Not Found	1	1	1	1	1	1	Not Found	Not Found	Not Found	Not Found	Not Found	Not Found	1	1	1	1	1	1	1	1	1	1	Not Found	Not Found	Not Found	1	Not Found	Not Found	Not Found
High	F6V440	Serglycin (Fragment) OS=Canis lupus familiaris OX=9615 GN=SRGN PE=4 SV=2	C_familiaris	2	18	2	1.042	0.997778	Not Found	Not Found	1	1	1	1	1	1	1	Not Found	Not Found	Not Found	1	1	Not Found	1	1	1	Not Found	Not Found	Not Found	Not Found	Not Found	Not Found	1	1	1	Not Found	Not Found	Not Found	1	1	Not Found	Not Found	Not Found	1	1	1	1	1	1
High	F2Z4Q6	Serum albumin OS=Canis lupus familiaris OX=9615 GN=AFP PE=4 SV=2	C_familiaris	61	30291	4	0.017	0.000311562	1	1	1	1	1	1	1	1	1	1	1	1	1	1	1	1	1	1	1	1	1	1	1	1	1	1	1	1	1	1	1	1	1	1	1	1	1	1	1	1	1
High	P60529	Hemoglobin subunit alpha OS=Canis lupus familiaris OX=9615 GN=HBA PE=1 SV=1	C_familiaris	11	2110	2	0.028	0.00277059	1	1	1	1	1	1	1	1	1	1	1	1	1	1	1	1	1	1	1	1	1	1	1	1	1	1	1	1	1	1	1	1	1	1	1	1	1	1	1	1	1
High	F1PBK6	Carbonic anhydrase 1 OS=Canis lupus familiaris OX=9615 GN=CA1 PE=3 SV=2	C_familiaris	13	431	13	0.034	0.0058015	1	1	1	1	1	1	1	1	1	1	1	1	1	1	1	1	1	1	1	1	1	1	1	1	1	1	1	1	1	1	1	1	1	1	1	1	1	1	1	1	1
High	Q2Z1P8	Anion exchange protein OS=Canis lupus familiaris OX=9615 GN=SLC4A1 PE=2 SV=1	C_familiaris	35	5705	35	0.036	0.00789798	1	1	1	1	1	1	1	1	1	1	1	1	1	1	1	1	1	1	1	1	1	1	1	1	1	1	1	1	1	1	1	1	1	1	1	1	1	1	1	1	1
High	P60524	Hemoglobin subunit beta OS=Canis lupus familiaris OX=9615 GN=HBB PE=1 SV=1	C_familiaris	17	4571	3	0.038	0.00912382	1	1	1	1	1	1	1	1	1	1	1	1	1	1	1	1	1	1	1	1	1	1	1	1	1	1	1	1	1	1	1	1	1	1	1	1	1	1	1	1	1
High	E2QVU9	Biliverdin reductase B OS=Canis lupus familiaris OX=9615 GN=BLVRB PE=4 SV=1	C_familiaris	11	490	11	0.038	0.00924257	1	1	1	1	1	1	1	1	1	1	1	1	1	1	1	1	1	1	1	1	1	1	1	1	1	1	1	1	1	1	1	1	1	1	1	1	1	1	1	1	1
High	F1PD51	Erythrocyte membrane protein band 4.2 OS=Canis lupus familiaris OX=9615 GN=EPB42 PE=4 SV=3	C_familiaris	33	934	32	0.055	0.0314313	1	1	1	1	1	1	1	1	1	1	1	1	1	1	1	1	1	1	1	1	1	1	1	1	1	1	1	1	1	1	1	1	1	1	1	1	1	1	1	1	1
High	Q3BCQ5	Ammonium transporter Rh type A OS=Canis lupus familiaris OX=9615 GN=RHAG PE=2 SV=1	C_familiaris	4	123	4	0.058	0.0377797	1	1	1	1	1	1	1	1	1	1	1	1	1	1	1	1	1	1	1	1	1	1	1	1	1	1	1	1	1	1	1	1	1	1	1	1	1	1	1	1	1
High	F1PDY8	Carbonic anhydrase 2 OS=Canis lupus familiaris OX=9615 GN=CA2 PE=3 SV=3	C_familiaris	14	350	14	0.061	0.0437822	1	1	1	1	1	1	1	1	1	1	1	1	1	1	1	1	1	1	1	1	1	1	1	1	1	1	1	1	1	1	1	1	1	1	1	1	1	1	1	1	1
High	E2R1P6	Spectrin alpha, erythrocytic 1 OS=Canis lupus familiaris OX=9615 GN=SPTA1 PE=4 SV=3	C_familiaris	182	8433	182	0.068	0.0621173	1	1	1	1	1	1	1	1	1	1	1	1	1	1	1	1	1	1	1	1	1	1	1	1	1	1	1	1	1	1	1	1	1	1	1	1	1	1	1	1	1
High	F1PCG4	Peroxiredoxin 2 OS=Canis lupus familiaris OX=9615 GN=PRDX2 PE=4 SV=2	C_familiaris	10	258	9	0.073	0.07309	1	1	1	1	1	1	1	1	1	1	1	1	1	1	1	1	1	1	1	1	1	1	1	1	1	1	1	1	1	1	1	1	1	1	1	1	1	1	1	1	1
High	F1Q253	Spectrin beta chain OS=Canis lupus familiaris OX=9615 GN=SPTB PE=3 SV=3	C_familiaris	159	6332	155	0.077	0.0845098	1	1	1	1	1	1	1	1	1	1	1	1	1	1	1	1	1	1	1	1	1	1	1	1	1	1	1	1	1	1	1	1	1	1	1	1	1	1	1	1	1
High	F1Q317	Galectin OS=Canis lupus familiaris OX=9615 GN=LGALS9 PE=4 SV=1	C_familiaris	14	843	14	0.079	0.0934228	1	1	1	1	1	1	1	1	1	1	1	1	1	1	1	1	1	1	1	1	1	1	1	1	1	1	1	1	1	1	1	1	1	1	1	1	1	1	1	1	1
High	J9P7E1	Protein 4.1 OS=Canis lupus familiaris OX=9615 GN=EPB41 PE=4 SV=2	C_familiaris	35	1243	5	0.099	0.159118	1	1	1	1	1	1	1	1	1	1	1	1	1	1	1	1	1	1	1	1	1	1	1	1	1	1	1	1	1	1	1	1	1	1	1	1	1	1	1	1	1
High	A0A5F4CR91	Basigin OS=Canis lupus familiaris OX=9615 GN=BSG PE=4 SV=1	C_familiaris	14	500	14	0.119	0.236041	1	1	1	1	1	1	1	1	1	1	1	1	1	1	1	1	1	1	1	1	1	1	1	1	1	1	1	1	1	1	1	1	1	1	1	1	1	1	1	1	1
High	P49822	Serum albumin OS=Canis lupus familiaris OX=9615 GN=ALB PE=1 SV=3	C_familiaris	63	29887	6	0.121	0.2485	1	1	1	1	1	1	1	1	1	1	1	1	1	1	1	1	1	1	1	1	1	1	1	1	1	1	1	1	1	1	1	1	1	1	1	1	1	1	1	1	1
High	E2QUV3	Alpha 2-HS glycoprotein OS=Canis lupus familiaris OX=9615 GN=AHSG PE=4 SV=2	C_familiaris	10	336	7	0.124	0.260471	1	1	1	1	1	1	1	1	1	1	1	1	1	1	1	1	1	1	1	1	1	1	1	1	1	1	1	1	1	1	1	1	1	1	1	1	1	1	1	1	1
High	F6XYK7	Adducin 2 OS=Canis lupus familiaris OX=9615 GN=ADD2 PE=4 SV=1	C_familiaris	37	584	36	0.128	0.275959	1	1	1	1	1	1	1	1	1	1	1	1	1	1	1	1	1	1	1	1	1	1	1	1	1	1	1	1	1	1	1	1	1	1	1	1	1	1	1	1	1
High	F1PDQ2	Dematin actin binding protein OS=Canis lupus familiaris OX=9615 GN=DMTN PE=4 SV=3	C_familiaris	18	423	18	0.137	0.319597	1	1	1	1	1	1	1	1	1	1	1	1	1	1	1	1	1	1	1	1	1	1	1	1	1	1	1	1	1	1	1	1	1	1	1	1	1	1	1	1	1
High	E2RES2	Serpin family C member 1 OS=Canis lupus familiaris OX=9615 GN=SERPINC1 PE=3 SV=3	C_familiaris	26	1348	17	0.141	0.333553	1	1	1	1	1	1	1	1	1	1	1	1	1	1	1	1	1	1	1	1	1	1	1	1	1	1	1	1	1	1	1	1	1	1	1	1	1	1	1	1	1
High	F1PF90	Ig-like domain-containing protein OS=Canis lupus familiaris OX=9615 PE=4 SV=3	C_familiaris	5	384	3	6.629	0.360435	1	1	1	1	1	1	1	1	1	1	1	1	1	1	1	1	1	1	1	1	1	1	1	1	1	1	1	1	1	1	1	1	1	1	1	1	1	1	1	1	1
High	A0A5F4BSQ8	Karyopherin subunit beta 1 OS=Canis lupus familiaris OX=9615 GN=KPNB1 PE=4 SV=1	C_familiaris	23	221	23	0.159	0.408021	1	1	1	1	1	1	1	1	1	1	1	1	1	1	1	1	1	1	1	1	1	1	1	1	1	1	1	1	1	1	1	1	1	1	1	1	1	1	1	1	1
High	F1PCE5	Serpin family A member 1 OS=Canis lupus familiaris OX=9615 GN=SERPINA1 PE=3 SV=3	C_familiaris	9	878	9	0.178	0.473901	1	1	1	1	1	1	1	1	1	1	1	1	1	1	1	1	1	1	1	1	1	1	1	1	1	1	1	1	1	1	1	1	1	1	1	1	1	1	1	1	1
High	P33703	Beta-2-glycoprotein 1 OS=Canis lupus familiaris OX=9615 GN=APOH PE=2 SV=1	C_familiaris	19	2127	16	0.18	0.482932	1	1	1	1	1	1	1	1	1	1	1	1	1	1	1	1	1	1	1	1	1	1	1	1	1	1	1	1	1	1	1	1	1	1	1	1	1	1	1	1	1
High	F1PQS2	Metalloproteinase inhibitor 1 OS=Canis lupus familiaris OX=9615 GN=TIMP1 PE=4 SV=2	C_familiaris	7	85	7	5.405	0.483904	1	1	1	1	1	1	1	1	1	1	1	1	1	1	1	1	1	1	1	1	1	1	1	1	1	1	1	1	1	1	1	1	1	1	1	1	1	1	1	1	1
High	P02677	Fibrinogen beta chain (Fragment) OS=Canis lupus familiaris OX=9615 GN=FGB PE=1 SV=2	C_familiaris	4	453	3	5.173	0.510679	1	1	1	1	1	1	1	1	1	1	1	1	1	1	1	1	1	1	1	1	1	1	1	1	1	1	1	1	1	1	1	1	1	1	1	1	1	1	1	1	1
High	A0A5F4CED7	Retinol binding protein 4 OS=Canis lupus familiaris OX=9615 GN=RBP4 PE=4 SV=1	C_familiaris	12	412	12	0.19	0.514832	1	1	1	1	1	1	1	1	1	1	1	1	1	1	1	1	1	1	1	1	1	1	1	1	1	1	1	1	1	1	1	1	1	1	1	1	1	1	1	1	1
High	A0A5F4C3T9	Phosphatidylcholine transfer protein OS=Canis lupus familiaris OX=9615 GN=PCTP PE=4 SV=1	C_familiaris	8	159	8	0.193	0.529559	1	1	1	1	1	1	1	1	1	1	1	1	1	1	1	1	1	1	1	1	1	1	1	1	1	1	1	1	1	1	1	1	1	1	1	1	1	1	1	1	1
High	P38400	Guanine nucleotide-binding protein G(i) subunit alpha-2 OS=Canis lupus familiaris OX=9615 GN=GNAI2 PE=2 SV=2	C_familiaris	18	489	12	0.199	0.552379	1	1	1	1	1	1	1	1	1	1	1	1	1	1	1	1	1	1	1	1	1	1	1	1	1	1	1	1	1	1	1	1	1	1	1	1	1	1	1	1	1
High	J9P430	Transferrin OS=Canis lupus familiaris OX=9615 GN=TF PE=3 SV=1	C_familiaris	65	8945	62	0.202	0.561662	1	1	1	1	1	1	1	1	1	1	1	1	1	1	1	1	1	1	1	1	1	1	1	1	1	1	1	1	1	1	1	1	1	1	1	1	1	1	1	1	1
High	E2R761	L-lactate dehydrogenase OS=Canis lupus familiaris OX=9615 GN=LDHB PE=3 SV=1	C_familiaris	12	204	11	0.202	0.563151	1	1	1	1	1	1	1	1	1	1	1	1	1	1	1	1	1	1	1	1	1	1	1	1	1	1	1	1	1	1	1	1	1	1	1	1	1	1	1	1	1
High	E2RLQ9	Valosin containing protein OS=Canis lupus familiaris OX=9615 GN=VCP PE=3 SV=3	C_familiaris	55	1963	55	0.205	0.578363	1	1	1	1	1	1	1	1	1	1	1	1	1	1	1	1	1	1	1	1	1	1	1	1	1	1	1	1	1	1	1	1	1	1	1	1	1	1	1	1	1
High	F1PAB0	Uncharacterized protein OS=Canis lupus familiaris OX=9615 GN=LOC489647 PE=4 SV=3	C_familiaris	13	653	13	4.63	0.597798	1	1	1	1	1	1	1	1	1	1	1	1	1	1	1	1	1	1	1	1	1	1	1	1	1	1	1	1	1	1	1	1	1	1	1	1	1	1	1	1	1
High	P62872	Guanine nucleotide-binding protein G(I)/G(S)/G(T) subunit beta-1 OS=Canis lupus familiaris OX=9615 GN=GNB1 PE=2 SV=3	C_familiaris	13	468	7	0.217	0.609595	1	1	1	1	1	1	1	1	1	1	1	1	1	1	1	1	1	1	1	1	1	1	1	1	1	1	1	1	1	1	1	1	1	1	1	1	1	1	1	1	1
High	A0A5F4CDV8	ATPase phospholipid transporting 8A1 OS=Canis lupus familiaris OX=9615 GN=ATP8A1 PE=4 SV=1	C_familiaris	3	33	3	4.428	0.612633	1	1	1	1	1	1	1	1	1	1	1	1	1	1	1	1	1	1	1	1	1	1	1	1	1	1	1	1	1	1	1	1	1	1	1	1	1	1	1	1	1
High	F1PTI2	Uncharacterized protein OS=Canis lupus familiaris OX=9615 GN=BTNL10 PE=4 SV=3	C_familiaris	14	72	14	0.217	0.61915	1	1	1	1	1	1	1	1	1	1	1	1	1	1	1	1	1	1	1	1	1	1	1	1	1	1	1	1	1	1	1	1	1	1	1	1	1	1	1	1	1
High	J9NX65	Uncharacterized protein OS=Canis lupus familiaris OX=9615 GN=SBSN PE=4 SV=2	C_familiaris	15	176	15	4.146	0.659239	1	1	1	1	1	1	1	1	1	1	1	1	1	1	1	1	1	1	1	1	1	1	1	1	1	1	1	1	1	1	1	1	1	1	1	1	1	1	1	1	1
High	F1P841	GC vitamin D binding protein OS=Canis lupus familiaris OX=9615 GN=GC PE=4 SV=3	C_familiaris	27	1821	20	0.236	0.661854	1	1	1	1	1	1	1	1	1	1	1	1	1	1	1	1	1	1	1	1	1	1	1	1	1	1	1	1	1	1	1	1	1	1	1	1	1	1	1	1	1
High	A0A5F4CLP4	Uncharacterized protein OS=Canis lupus familiaris OX=9615 GN=LOC609365 PE=4 SV=1	C_familiaris	13	408	13	0.242	0.673953	1	1	1	1	1	1	1	1	1	1	1	1	1	1	1	1	1	1	1	1	1	1	1	1	1	1	1	1	1	1	1	1	1	1	1	1	1	1	1	1	1
High	E2R3R2	Proteasome subunit beta OS=Canis lupus familiaris OX=9615 GN=PSMB5 PE=3 SV=1	C_familiaris	13	415	13	0.247	0.695163	1	1	1	1	1	1	1	1	1	1	1	1	1	1	1	1	1	1	1	1	1	1	1	1	1	1	1	1	1	1	1	1	1	1	1	1	1	1	1	1	1
High	E2R5E9	TR_THY domain-containing protein OS=Canis lupus familiaris OX=9615 PE=4 SV=3	C_familiaris	3	74	3	3.868	0.705174	1	1	1	1	1	1	1	1	1	1	1	1	1	1	1	1	1	1	1	1	1	1	1	1	1	1	1	1	1	1	1	1	1	1	1	1	1	1	1	1	1
High	A0A5F4DGD5	Uncharacterized protein OS=Canis lupus familiaris OX=9615 PE=4 SV=1	C_familiaris	6	657	6	3.807	0.71722	1	1	1	1	1	1	1	1	1	1	1	1	1	1	1	1	1	1	1	1	1	1	1	1	1	1	1	1	1	1	1	1	1	1	1	1	1	1	1	1	1
High	Q5QQ50	Xylosyltransferase 2 OS=Canis lupus familiaris OX=9615 GN=XYLT2 PE=2 SV=1	C_familiaris	7	87	7	3.792	0.720551	1	1	1	1	1	1	1	1	1	1	1	1	1	1	1	1	1	1	1	1	1	1	1	1	1	1	1	1	1	1	1	1	1	1	1	1	1	1	1	1	1
High	L7N0E7	Ig-like domain-containing protein OS=Canis lupus familiaris OX=9615 PE=4 SV=2	C_familiaris	2	78	2	3.762	0.726666	1	1	1	1	1	1	1	1	1	1	1	1	1	1	1	1	1	1	1	1	1	1	1	1	1	1	1	1	1	1	1	1	1	1	1	1	1	1	1	1	1
High	E2QZQ1	Transferrin OS=Canis lupus familiaris OX=9615 GN=TF PE=3 SV=2	C_familiaris	34	1074	33	0.262	0.736041	1	1	1	1	1	1	1	1	1	1	1	1	1	1	1	1	1	1	1	1	1	1	1	1	1	1	1	1	1	1	1	1	1	1	1	1	1	1	1	1	1
High	A0A5F4CAX2	Uncharacterized protein OS=Canis lupus familiaris OX=9615 PE=4 SV=1	C_familiaris	7	185	7	3.702	0.737287	1	1	1	1	1	1	1	1	1	1	1	1	1	1	1	1	1	1	1	1	1	1	1	1	1	1	1	1	1	1	1	1	1	1	1	1	1	1	1	1	1
High	E2R2K4	RAP1B, member of RAS oncogene family OS=Canis lupus familiaris OX=9615 GN=RAP1B PE=4 SV=1	C_familiaris	11	654	3	0.275	0.773985	1	1	1	1	1	1	1	1	1	1	1	1	1	1	1	1	1	1	1	1	1	1	1	1	1	1	1	1	1	1	1	1	1	1	1	1	1	1	1	1	1
High	A0A5F4CSF0	Uncharacterized protein OS=Canis lupus familiaris OX=9615 PE=4 SV=1	C_familiaris	9	3964	2	3.543	0.773985	1	1	1	1	1	1	1	1	1	1	1	1	1	1	1	1	1	1	1	1	1	1	1	1	1	1	1	1	1	1	1	1	1	1	1	1	1	1	1	1	1
High	F1P7W0	Uncharacterized protein OS=Canis lupus familiaris OX=9615 GN=SELP PE=4 SV=2	C_familiaris	16	251	16	3.444	0.796189	1	1	1	1	1	1	1	1	1	1	1	1	1	1	1	1	1	1	1	1	1	1	1	1	1	1	1	1	1	1	1	1	1	1	1	1	1	1	1	1	1
High	E2RS75	Uncharacterized protein OS=Canis lupus familiaris OX=9615 GN=CFB PE=3 SV=2	C_familiaris	27	1020	25	0.293	0.811316	1	1	1	1	1	1	1	1	1	1	1	1	1	1	1	1	1	1	1	1	1	1	1	1	1	1	1	1	1	1	1	1	1	1	1	1	1	1	1	1	1
High	F1PEN6	Transferrin receptor protein 1 OS=Canis lupus familiaris OX=9615 GN=TFRC PE=4 SV=2	C_familiaris	31	1063	31	0.294	0.812589	1	1	1	1	1	1	1	1	1	1	1	1	1	1	1	1	1	1	1	1	1	1	1	1	1	1	1	1	1	1	1	1	1	1	1	1	1	1	1	1	1
High	A0A5F4BUJ7	Uncharacterized protein OS=Canis lupus familiaris OX=9615 PE=4 SV=1	C_familiaris	5	290	4	3.304	0.812589	1	1	1	1	1	1	1	1	1	1	1	1	1	1	1	1	1	1	1	1	1	1	1	1	1	1	1	1	1	1	1	1	1	1	1	1	1	1	1	1	1
High	E2R5U8	Transthyretin OS=Canis lupus familiaris OX=9615 GN=TTR PE=3 SV=1	C_familiaris	7	319	7	0.305	0.826973	1	1	1	1	1	1	1	1	1	1	1	1	1	1	1	1	1	1	1	1	1	1	1	1	1	1	1	1	1	1	1	1	1	1	1	1	1	1	1	1	1
High	E2QZ19	Serum albumin OS=Canis lupus familiaris OX=9615 GN=AFP PE=4 SV=2	C_familiaris	25	636	25	0.309	0.831917	1	1	1	1	1	1	1	1	1	1	1	1	1	1	1	1	1	1	1	1	1	1	1	1	1	1	1	1	1	1	1	1	1	1	1	1	1	1	1	1	1
High	F1PH61	Ig-like domain-containing protein OS=Canis lupus familiaris OX=9615 PE=4 SV=3	C_familiaris	4	264	3	3.164	0.831917	1	1	1	1	1	1	1	1	1	1	1	1	1	1	1	1	1	1	1	1	1	1	1	1	1	1	1	1	1	1	1	1	1	1	1	1	1	1	1	1	1
High	A0A5F4C493	Uncharacterized protein OS=Canis lupus familiaris OX=9615 PE=4 SV=1	C_familiaris	5	1533	2	3.149	0.831917	1	1	1	1	1	1	1	1	1	1	1	1	1	1	1	1	1	1	1	1	1	1	1	1	1	1	1	1	1	1	1	1	1	1	1	1	1	1	1	1	1
High	F1PKN5	Ig-like domain-containing protein OS=Canis lupus familiaris OX=9615 PE=4 SV=3	C_familiaris	2	414	2	3.147	0.831917	1	1	1	1	1	1	1	1	1	1	1	1	1	1	1	1	1	1	1	1	1	1	1	1	1	1	1	1	1	1	1	1	1	1	1	1	1	1	1	1	1
High	E2QXS7	Adenosylhomocysteinase OS=Canis lupus familiaris OX=9615 GN=AHCY PE=3 SV=3	C_familiaris	7	38	7	0.313	0.836891	1	1	1	1	1	1	1	1	1	1	1	1	1	1	1	1	1	1	1	1	1	1	1	1	1	1	1	1	1	1	1	1	1	1	1	1	1	1	1	1	1
High	E2RMF9	Serpin family A member 5 OS=Canis lupus familiaris OX=9615 GN=SERPINA5 PE=3 SV=2	C_familiaris	16	186	16	0.315	0.839973	1	1	1	1	1	1	1	1	1	1	1	1	1	1	1	1	1	1	1	1	1	1	1	1	1	1	1	1	1	1	1	1	1	1	1	1	1	1	1	1	1
High	Q28259	Glyceraldehyde-3-phosphate dehydrogenase OS=Canis lupus familiaris OX=9615 GN=GAPDH PE=2 SV=3	C_familiaris	14	715	3	0.316	0.840976	1	1	1	1	1	1	1	1	1	1	1	1	1	1	1	1	1	1	1	1	1	1	1	1	1	1	1	1	1	1	1	1	1	1	1	1	1	1	1	1	1
High	F1PAL5	Angiotensinogen OS=Canis lupus familiaris OX=9615 GN=AGT PE=3 SV=3	C_familiaris	8	84	8	0.304	0.849614	1	1	1	1	1	1	1	1	1	1	1	1	1	1	1	1	1	1	1	1	1	1	1	1	1	1	1	1	1	1	1	1	1	1	1	1	1	1	1	1	1
High	A0A5F4CH63	Uncharacterized protein OS=Canis lupus familiaris OX=9615 PE=4 SV=1	C_familiaris	3	590	3	2.94	0.854406	1	1	1	1	1	1	1	1	1	1	1	1	1	1	1	1	1	1	1	1	1	1	1	1	1	1	1	1	1	1	1	1	1	1	1	1	1	1	1	1	1
High	F1PTZ5	CD44 antigen OS=Canis lupus familiaris OX=9615 GN=CD44 PE=4 SV=3	C_familiaris	7	129	7	0.335	0.859131	1	1	1	1	1	1	1	1	1	1	1	1	1	1	1	1	1	1	1	1	1	1	1	1	1	1	1	1	1	1	1	1	1	1	1	1	1	1	1	1	1
High	F1PBL4	Fibrinogen alpha chain OS=Canis lupus familiaris OX=9615 GN=FGA PE=4 SV=2	C_familiaris	80	21627	74	2.901	0.860325	1	1	1	1	1	1	1	1	1	1	1	1	1	1	1	1	1	1	1	1	1	1	1	1	1	1	1	1	1	1	1	1	1	1	1	1	1	1	1	1	1
High	J9NZL6	Reelin OS=Canis lupus familiaris OX=9615 GN=RELN PE=4 SV=2	C_familiaris	42	617	42	2.885	0.863304	1	1	1	1	1	1	1	1	1	1	1	1	1	1	1	1	1	1	1	1	1	1	1	1	1	1	1	1	1	1	1	1	1	1	1	1	1	1	1	1	1
High	E2R7N4	Hematopoietic cell-specific Lyn substrate 1 OS=Canis lupus familiaris OX=9615 GN=HCLS1 PE=4 SV=2	C_familiaris	8	69	8	2.852	0.873045	1	1	1	1	1	1	1	1	1	1	1	1	1	1	1	1	1	1	1	1	1	1	1	1	1	1	1	1	1	1	1	1	1	1	1	1	1	1	1	1	1
High	A0A5F4DCA5	Uncharacterized protein OS=Canis lupus familiaris OX=9615 PE=4 SV=1	C_familiaris	5	835	2	2.852	0.873045	1	1	1	1	1	1	1	1	1	1	1	1	1	1	1	1	1	1	1	1	1	1	1	1	1	1	1	1	1	1	1	1	1	1	1	1	1	1	1	1	1
High	E2R0T6	Heat shock protein family A (Hsp70) member 8 OS=Canis lupus familiaris OX=9615 GN=HSPA8 PE=3 SV=1	C_familiaris	27	1428	20	0.346	0.87835	1	1	1	1	1	1	1	1	1	1	1	1	1	1	1	1	1	1	1	1	1	1	1	1	1	1	1	1	1	1	1	1	1	1	1	1	1	1	1	1	1
High	F1Q421	Plasminogen OS=Canis lupus familiaris OX=9615 GN=PLG PE=3 SV=2	C_familiaris	43	3311	39	0.348	0.880036	1	1	1	1	1	1	1	1	1	1	1	1	1	1	1	1	1	1	1	1	1	1	1	1	1	1	1	1	1	1	1	1	1	1	1	1	1	1	1	1	1
High	F1PXD6	Proteoglycan 4 OS=Canis lupus familiaris OX=9615 GN=PRG4 PE=4 SV=3	C_familiaris	21	1000	21	2.718	0.884543	1	1	1	1	1	1	1	1	1	1	1	1	1	1	1	1	1	1	1	1	1	1	1	1	1	1	1	1	1	1	1	1	1	1	1	1	1	1	1	1	1
High	A0A5F4CBH6	Uncharacterized protein OS=Canis lupus familiaris OX=9615 PE=4 SV=1	C_familiaris	8	688	6	2.69	0.884543	1	1	1	1	1	1	1	1	1	1	1	1	1	1	1	1	1	1	1	1	1	1	1	1	1	1	1	1	1	1	1	1	1	1	1	1	1	1	1	1	1
High	F1PK62	Peptidyl-prolyl cis-trans isomerase OS=Canis lupus familiaris OX=9615 PE=3 SV=2	C_familiaris	5	195	5	0.356	0.884543	1	1	1	1	1	1	1	1	1	1	1	1	1	1	1	1	1	1	1	1	1	1	1	1	1	1	1	1	1	1	1	1	1	1	1	1	1	1	1	1	1
High	A0A5F4CUH8	Golgi membrane protein 1 OS=Canis lupus familiaris OX=9615 GN=GOLM1 PE=4 SV=1	C_familiaris	13	273	13	2.674	0.889347	1	1	1	1	1	1	1	1	1	1	1	1	1	1	1	1	1	1	1	1	1	1	1	1	1	1	1	1	1	1	1	1	1	1	1	1	1	1	1	1	1
High	E2RJC2	Complement C1q C chain OS=Canis lupus familiaris OX=9615 GN=C1QC PE=4 SV=2	C_familiaris	5	2295	5	2.634	0.890127	1	1	1	1	1	1	1	1	1	1	1	1	1	1	1	1	1	1	1	1	1	1	1	1	1	1	1	1	1	1	1	1	1	1	1	1	1	1	1	1	1
High	A0A5F4CSD5	Uncharacterized protein OS=Canis lupus familiaris OX=9615 PE=4 SV=1	C_familiaris	9	2407	3	2.655	0.890127	1	1	1	1	1	1	1	1	1	1	1	1	1	1	1	1	1	1	1	1	1	1	1	1	1	1	1	1	1	1	1	1	1	1	1	1	1	1	1	1	1
High	F1PZA0	Delta-aminolevulinic acid dehydratase OS=Canis lupus familiaris OX=9615 GN=ALAD PE=3 SV=2	C_familiaris	14	217	14	0.37	0.89224	1	1	1	1	1	1	1	1	1	1	1	1	1	1	1	1	1	1	1	1	1	1	1	1	1	1	1	1	1	1	1	1	1	1	1	1	1	1	1	1	1
High	P01784	Ig heavy chain V region GOM OS=Canis lupus familiaris OX=9615 PE=1 SV=1	C_familiaris	4	385	3	2.621	0.895404	1	1	1	1	1	1	1	1	1	1	1	1	1	1	1	1	1	1	1	1	1	1	1	1	1	1	1	1	1	1	1	1	1	1	1	1	1	1	1	1	1
High	F1PQ40	Proteasome 26S subunit, ATPase 1 OS=Canis lupus familiaris OX=9615 GN=PSMC1 PE=3 SV=2	C_familiaris	11	66	10	0.361	0.897378	1	1	1	1	1	1	1	1	1	1	1	1	1	1	1	1	1	1	1	1	1	1	1	1	1	1	1	1	1	1	1	1	1	1	1	1	1	1	1	1	1
High	J9NYG8	Complement component 4 binding protein beta OS=Canis lupus familiaris OX=9615 GN=C4BPB PE=4 SV=1	C_familiaris	8	707	8	2.591	0.897378	1	1	1	1	1	1	1	1	1	1	1	1	1	1	1	1	1	1	1	1	1	1	1	1	1	1	1	1	1	1	1	1	1	1	1	1	1	1	1	1	1
High	A0A5F4D5I3	Uncharacterized protein OS=Canis lupus familiaris OX=9615 PE=4 SV=1	C_familiaris	5	1394	3	2.606	0.897378	1	1	1	1	1	1	1	1	1	1	1	1	1	1	1	1	1	1	1	1	1	1	1	1	1	1	1	1	1	1	1	1	1	1	1	1	1	1	1	1	1
High	F1P8G0	Fibrinogen gamma chain OS=Canis lupus familiaris OX=9615 GN=FGG PE=4 SV=2	C_familiaris	45	19809	44	2.558	0.905373	1	1	1	1	1	1	1	1	1	1	1	1	1	1	1	1	1	1	1	1	1	1	1	1	1	1	1	1	1	1	1	1	1	1	1	1	1	1	1	1	1
High	A0A5F4CJL8	Sushi, von Willebrand factor type A, EGF and pentraxin domain containing 1 OS=Canis lupus familiaris OX=9615 GN=SVEP1 PE=4 SV=1	C_familiaris	46	386	46	2.548	0.906463	1	1	1	1	1	1	1	1	1	1	1	1	1	1	1	1	1	1	1	1	1	1	1	1	1	1	1	1	1	1	1	1	1	1	1	1	1	1	1	1	1
High	E2RGF3	Na(+)/H(+) exchange regulatory cofactor NHE-RF OS=Canis lupus familiaris OX=9615 GN=SLC9A3R1 PE=2 SV=3	C_familiaris	6	82	6	2.54	0.908241	1	1	1	1	1	1	1	1	1	1	1	1	1	1	1	1	1	1	1	1	1	1	1	1	1	1	1	1	1	1	1	1	1	1	1	1	1	1	1	1	1
High	A0A5F4D0M8	Calpain 5 OS=Canis lupus familiaris OX=9615 GN=CAPN5 PE=4 SV=1	C_familiaris	16	144	16	0.386	0.910199	1	1	1	1	1	1	1	1	1	1	1	1	1	1	1	1	1	1	1	1	1	1	1	1	1	1	1	1	1	1	1	1	1	1	1	1	1	1	1	1	1
High	F1PF02	Proteasome subunit beta OS=Canis lupus familiaris OX=9615 GN=PSMB1 PE=3 SV=3	C_familiaris	13	504	13	0.384	0.910199	1	1	1	1	1	1	1	1	1	1	1	1	1	1	1	1	1	1	1	1	1	1	1	1	1	1	1	1	1	1	1	1	1	1	1	1	1	1	1	1	1
High	A0A5F4BYJ5	Uncharacterized protein OS=Canis lupus familiaris OX=9615 PE=4 SV=1	C_familiaris	36	18318	5	2.523	0.910199	1	1	1	1	1	1	1	1	1	1	1	1	1	1	1	1	1	1	1	1	1	1	1	1	1	1	1	1	1	1	1	1	1	1	1	1	1	1	1	1	1
High	E2RJY0	Potassium channel tetramerization domain containing 12 OS=Canis lupus familiaris OX=9615 GN=KCTD12 PE=4 SV=2	C_familiaris	16	979	16	2.501	0.910769	1	1	1	1	1	1	1	1	1	1	1	1	1	1	1	1	1	1	1	1	1	1	1	1	1	1	1	1	1	1	1	1	1	1	1	1	1	1	1	1	1
High	E2R478	Neuronal pentraxin 1 OS=Canis lupus familiaris OX=9615 GN=NPTX1 PE=4 SV=1	C_familiaris	10	68	10	0.372	0.910769	1	1	1	1	1	1	1	1	1	1	1	1	1	1	1	1	1	1	1	1	1	1	1	1	1	1	1	1	1	1	1	1	1	1	1	1	1	1	1	1	1
High	J9NY02	Ig-like domain-containing protein OS=Canis lupus familiaris OX=9615 PE=4 SV=2	C_familiaris	11	3097	6	2.482	0.910769	1	1	1	1	1	1	1	1	1	1	1	1	1	1	1	1	1	1	1	1	1	1	1	1	1	1	1	1	1	1	1	1	1	1	1	1	1	1	1	1	1
High	E2R886	Kininogen 1 OS=Canis lupus familiaris OX=9615 GN=KNG1 PE=4 SV=3	C_familiaris	24	1832	3	0.391	0.910769	1	1	1	1	1	1	1	1	1	1	1	1	1	1	1	1	1	1	1	1	1	1	1	1	1	1	1	1	1	1	1	1	1	1	1	1	1	1	1	1	1
High	L7N0I0	Ig-like domain-containing protein OS=Canis lupus familiaris OX=9615 PE=4 SV=2	C_familiaris	8	2969	3	2.477	0.911525	1	1	1	1	1	1	1	1	1	1	1	1	1	1	1	1	1	1	1	1	1	1	1	1	1	1	1	1	1	1	1	1	1	1	1	1	1	1	1	1	1
High	F1PKW7	Tyrosine 3-monooxygenase/tryptophan 5-monooxygenase activation protein beta OS=Canis lupus familiaris OX=9615 GN=YWHAB PE=3 SV=3	C_familiaris	13	421	9	0.393	0.911642	1	1	1	1	1	1	1	1	1	1	1	1	1	1	1	1	1	1	1	1	1	1	1	1	1	1	1	1	1	1	1	1	1	1	1	1	1	1	1	1	1
High	F1PXX1	EH domain containing 3 OS=Canis lupus familiaris OX=9615 GN=EHD3 PE=3 SV=2	C_familiaris	31	500	16	0.397	0.917303	1	1	1	1	1	1	1	1	1	1	1	1	1	1	1	1	1	1	1	1	1	1	1	1	1	1	1	1	1	1	1	1	1	1	1	1	1	1	1	1	1
High	F1PGM9	Complement component 4 binding protein alpha OS=Canis lupus familiaris OX=9615 GN=C4BPA PE=4 SV=3	C_familiaris	45	20245	18	2.436	0.919258	1	1	1	1	1	1	1	1	1	1	1	1	1	1	1	1	1	1	1	1	1	1	1	1	1	1	1	1	1	1	1	1	1	1	1	1	1	1	1	1	1
High	F1PH87	Serpin family A member 3 OS=Canis lupus familiaris OX=9615 GN=SERPINA3 PE=3 SV=3	C_familiaris	15	300	15	0.399	0.919258	1	1	1	1	1	1	1	1	1	1	1	1	1	1	1	1	1	1	1	1	1	1	1	1	1	1	1	1	1	1	1	1	1	1	1	1	1	1	1	1	1
High	A0A5F4C0D1	Complement C1q A chain OS=Canis lupus familiaris OX=9615 GN=C1QA PE=4 SV=1	C_familiaris	7	846	7	2.437	0.919258	1	1	1	1	1	1	1	1	1	1	1	1	1	1	1	1	1	1	1	1	1	1	1	1	1	1	1	1	1	1	1	1	1	1	1	1	1	1	1	1	1
High	J9NSQ1	Ig-like domain-containing protein OS=Canis lupus familiaris OX=9615 PE=4 SV=2	C_familiaris	11	10138	3	2.441	0.919258	1	1	1	1	1	1	1	1	1	1	1	1	1	1	1	1	1	1	1	1	1	1	1	1	1	1	1	1	1	1	1	1	1	1	1	1	1	1	1	1	1
High	A0A5F4DH03	Coagulation factor X OS=Canis lupus familiaris OX=9615 GN=F10 PE=4 SV=1	C_familiaris	11	110	11	0.4	0.919706	1	1	1	1	1	1	1	1	1	1	1	1	1	1	1	1	1	1	1	1	1	1	1	1	1	1	1	1	1	1	1	1	1	1	1	1	1	1	1	1	1
High	J9PAL2	Ig-like domain-containing protein OS=Canis lupus familiaris OX=9615 PE=4 SV=2	C_familiaris	10	1814	3	2.424	0.921702	1	1	1	1	1	1	1	1	1	1	1	1	1	1	1	1	1	1	1	1	1	1	1	1	1	1	1	1	1	1	1	1	1	1	1	1	1	1	1	1	1
High	E2RNL3	Peroxiredoxin 4 OS=Canis lupus familiaris OX=9615 GN=PRDX4 PE=4 SV=2	C_familiaris	11	476	3	2.423	0.921702	1	1	1	1	1	1	1	1	1	1	1	1	1	1	1	1	1	1	1	1	1	1	1	1	1	1	1	1	1	1	1	1	1	1	1	1	1	1	1	1	1
High	F1PZR4	Hemopexin OS=Canis lupus familiaris OX=9615 GN=APBB1 PE=3 SV=3	C_familiaris	15	804	15	0.409	0.930865	1	1	1	1	1	1	1	1	1	1	1	1	1	1	1	1	1	1	1	1	1	1	1	1	1	1	1	1	1	1	1	1	1	1	1	1	1	1	1	1	1
High	F1P8Z5	Apolipoprotein B OS=Canis lupus familiaris OX=9615 GN=APOB PE=4 SV=2	C_familiaris	252	17788	247	2.308	0.933819	1	1	1	1	1	1	1	1	1	1	1	1	1	1	1	1	1	1	1	1	1	1	1	1	1	1	1	1	1	1	1	1	1	1	1	1	1	1	1	1	1
High	A0A5F4CWM9	Myosin-9 OS=Canis lupus familiaris OX=9615 GN=MYH9 PE=4 SV=1	C_familiaris	99	1779	99	2.214	0.933819	1	1	1	1	1	1	1	1	1	1	1	1	1	1	1	1	1	1	1	1	1	1	1	1	1	1	1	1	1	1	1	1	1	1	1	1	1	1	1	1	1
High	F1PGS2	Fibrinogen beta chain OS=Canis lupus familiaris OX=9615 GN=FGB PE=4 SV=2	C_familiaris	52	30290	45	2.363	0.933819	1	1	1	1	1	1	1	1	1	1	1	1	1	1	1	1	1	1	1	1	1	1	1	1	1	1	1	1	1	1	1	1	1	1	1	1	1	1	1	1	1
High	F1PDJ5	Apolipoprotein A-I OS=Canis lupus familiaris OX=9615 GN=APOA1 PE=3 SV=1	C_familiaris	37	5821	37	0.421	0.933819	1	1	1	1	1	1	1	1	1	1	1	1	1	1	1	1	1	1	1	1	1	1	1	1	1	1	1	1	1	1	1	1	1	1	1	1	1	1	1	1	1
High	P18649	Apolipoprotein E OS=Canis lupus familiaris OX=9615 GN=APOE PE=1 SV=3	C_familiaris	35	8021	35	2.037	0.933819	1	1	1	1	1	1	1	1	1	1	1	1	1	1	1	1	1	1	1	1	1	1	1	1	1	1	1	1	1	1	1	1	1	1	1	1	1	1	1	1	1
High	J9NVC6	Immunoglobulin heavy constant mu OS=Canis lupus familiaris OX=9615 GN=IGHM PE=4 SV=2	C_familiaris	34	23847	33	1.968	0.933819	1	1	1	1	1	1	1	1	1	1	1	1	1	1	1	1	1	1	1	1	1	1	1	1	1	1	1	1	1	1	1	1	1	1	1	1	1	1	1	1	1
High	F1P903	Complement C1r OS=Canis lupus familiaris OX=9615 GN=C1R PE=3 SV=2	C_familiaris	32	2746	32	1.879	0.933819	1	1	1	1	1	1	1	1	1	1	1	1	1	1	1	1	1	1	1	1	1	1	1	1	1	1	1	1	1	1	1	1	1	1	1	1	1	1	1	1	1
High	A0A5F4BZM5	Ceruloplasmin OS=Canis lupus familiaris OX=9615 GN=CP PE=4 SV=1	C_familiaris	36	1372	31	0.518	0.933819	1	1	1	1	1	1	1	1	1	1	1	1	1	1	1	1	1	1	1	1	1	1	1	1	1	1	1	1	1	1	1	1	1	1	1	1	1	1	1	1	1
High	F1PSS8	Protein S OS=Canis lupus familiaris OX=9615 GN=PROS1 PE=4 SV=3	C_familiaris	34	3153	30	2.156	0.933819	1	1	1	1	1	1	1	1	1	1	1	1	1	1	1	1	1	1	1	1	1	1	1	1	1	1	1	1	1	1	1	1	1	1	1	1	1	1	1	1	1
High	F1PRU9	Integrin subunit alpha 2b OS=Canis lupus familiaris OX=9615 GN=ITGA2B PE=3 SV=2	C_familiaris	29	1120	29	0.481	0.933819	1	1	1	1	1	1	1	1	1	1	1	1	1	1	1	1	1	1	1	1	1	1	1	1	1	1	1	1	1	1	1	1	1	1	1	1	1	1	1	1	1
High	F1PPG5	Integrin beta OS=Canis lupus familiaris OX=9615 GN=ITGB3 PE=3 SV=2	C_familiaris	29	1871	29	0.437	0.933819	1	1	1	1	1	1	1	1	1	1	1	1	1	1	1	1	1	1	1	1	1	1	1	1	1	1	1	1	1	1	1	1	1	1	1	1	1	1	1	1	1
High	J9NSF9	Prothrombin OS=Canis lupus familiaris OX=9615 GN=F2 PE=3 SV=2	C_familiaris	29	1180	29	0.423	0.933819	1	1	1	1	1	1	1	1	1	1	1	1	1	1	1	1	1	1	1	1	1	1	1	1	1	1	1	1	1	1	1	1	1	1	1	1	1	1	1	1	1
High	F1PG16	Uncharacterized protein OS=Canis lupus familiaris OX=9615 GN=CD5L PE=4 SV=2	C_familiaris	29	11292	28	2.301	0.933819	1	1	1	1	1	1	1	1	1	1	1	1	1	1	1	1	1	1	1	1	1	1	1	1	1	1	1	1	1	1	1	1	1	1	1	1	1	1	1	1	1
High	A0A5F4BXN3	Gelsolin OS=Canis lupus familiaris OX=9615 GN=GSN PE=4 SV=1	C_familiaris	28	1552	28	0.466	0.933819	1	1	1	1	1	1	1	1	1	1	1	1	1	1	1	1	1	1	1	1	1	1	1	1	1	1	1	1	1	1	1	1	1	1	1	1	1	1	1	1	1
High	E2RT60	Integrin beta OS=Canis lupus familiaris OX=9615 GN=ITGB1 PE=3 SV=3	C_familiaris	28	701	28	0.462	0.933819	1	1	1	1	1	1	1	1	1	1	1	1	1	1	1	1	1	1	1	1	1	1	1	1	1	1	1	1	1	1	1	1	1	1	1	1	1	1	1	1	1
High	E2RG01	Complement C7 OS=Canis lupus familiaris OX=9615 GN=C7 PE=4 SV=3	C_familiaris	33	656	27	0.433	0.933819	1	1	1	1	1	1	1	1	1	1	1	1	1	1	1	1	1	1	1	1	1	1	1	1	1	1	1	1	1	1	1	1	1	1	1	1	1	1	1	1	1
High	O97492	Catalase OS=Canis lupus familiaris OX=9615 GN=CAT PE=1 SV=3	C_familiaris	25	414	25	0.489	0.933819	1	1	1	1	1	1	1	1	1	1	1	1	1	1	1	1	1	1	1	1	1	1	1	1	1	1	1	1	1	1	1	1	1	1	1	1	1	1	1	1	1
High	F1PCV3	Angiotensin-converting enzyme OS=Canis lupus familiaris OX=9615 GN=ACE PE=3 SV=3	C_familiaris	22	85	22	0.446	0.933819	1	1	1	1	1	1	1	1	1	1	1	1	1	1	1	1	1	1	1	1	1	1	1	1	1	1	1	1	1	1	1	1	1	1	1	1	1	1	1	1	1
High	F1PB77	Alpha-1,4 glucan phosphorylase OS=Canis lupus familiaris OX=9615 GN=PYGL PE=3 SV=2	C_familiaris	23	132	20	1.914	0.933819	1	1	1	1	1	1	1	1	1	1	1	1	1	1	1	1	1	1	1	1	1	1	1	1	1	1	1	1	1	1	1	1	1	1	1	1	1	1	1	1	1
High	E2R109	Complement C8 alpha chain OS=Canis lupus familiaris OX=9615 GN=C8A PE=4 SV=1	C_familiaris	20	472	20	0.526	0.933819	1	1	1	1	1	1	1	1	1	1	1	1	1	1	1	1	1	1	1	1	1	1	1	1	1	1	1	1	1	1	1	1	1	1	1	1	1	1	1	1	1
High	A0A5F4D4F1	Moesin OS=Canis lupus familiaris OX=9615 GN=MSN PE=4 SV=1	C_familiaris	28	574	20	0.495	0.933819	1	1	1	1	1	1	1	1	1	1	1	1	1	1	1	1	1	1	1	1	1	1	1	1	1	1	1	1	1	1	1	1	1	1	1	1	1	1	1	1	1
High	A0A5F4D8A3	Low density lipoprotein receptor OS=Canis lupus familiaris OX=9615 GN=LDLR PE=4 SV=1	C_familiaris	20	127	20	0.488	0.933819	1	1	1	1	1	1	1	1	1	1	1	1	1	1	1	1	1	1	1	1	1	1	1	1	1	1	1	1	1	1	1	1	1	1	1	1	1	1	1	1	1
High	F1PBJ3	Uncharacterized protein OS=Canis lupus familiaris OX=9615 GN=LMNA PE=3 SV=2	C_familiaris	20	103	19	2.001	0.933819	1	1	1	1	1	1	1	1	1	1	1	1	1	1	1	1	1	1	1	1	1	1	1	1	1	1	1	1	1	1	1	1	1	1	1	1	1	1	1	1	1
High	E2R4V3	Serpin family F member 2 OS=Canis lupus familiaris OX=9615 GN=SERPINF2 PE=3 SV=1	C_familiaris	18	614	18	0.441	0.933819	1	1	1	1	1	1	1	1	1	1	1	1	1	1	1	1	1	1	1	1	1	1	1	1	1	1	1	1	1	1	1	1	1	1	1	1	1	1	1	1	1
High	A0A5F4CTD0	Alpha-1-B glycoprotein OS=Canis lupus familiaris OX=9615 GN=A1BG PE=4 SV=1	C_familiaris	18	737	18	0.438	0.933819	1	1	1	1	1	1	1	1	1	1	1	1	1	1	1	1	1	1	1	1	1	1	1	1	1	1	1	1	1	1	1	1	1	1	1	1	1	1	1	1	1
High	A0A5F4C5P0	ADAM metallopeptidase domain 10 OS=Canis lupus familiaris OX=9615 GN=ADAM10 PE=4 SV=1	C_familiaris	18	147	18	0.409	0.933819	1	1	1	1	1	1	1	1	1	1	1	1	1	1	1	1	1	1	1	1	1	1	1	1	1	1	1	1	1	1	1	1	1	1	1	1	1	1	1	1	1
High	A0A5F4DA08	Oncoprotein induced transcript 3 OS=Canis lupus familiaris OX=9615 GN=OIT3 PE=4 SV=1	C_familiaris	17	344	17	2.118	0.933819	1	1	1	1	1	1	1	1	1	1	1	1	1	1	1	1	1	1	1	1	1	1	1	1	1	1	1	1	1	1	1	1	1	1	1	1	1	1	1	1	1
High	E2RLN1	Serpin family D member 1 OS=Canis lupus familiaris OX=9615 GN=SERPIND1 PE=3 SV=2	C_familiaris	17	214	17	0.411	0.933819	1	1	1	1	1	1	1	1	1	1	1	1	1	1	1	1	1	1	1	1	1	1	1	1	1	1	1	1	1	1	1	1	1	1	1	1	1	1	1	1	1
High	A0A5F4CEP4	Fetuin B OS=Canis lupus familiaris OX=9615 GN=FETUB PE=4 SV=1	C_familiaris	17	637	16	0.416	0.933819	1	1	1	1	1	1	1	1	1	1	1	1	1	1	1	1	1	1	1	1	1	1	1	1	1	1	1	1	1	1	1	1	1	1	1	1	1	1	1	1	1
High	A0A5F4CBF2	Tropomyosin 4 OS=Canis lupus familiaris OX=9615 GN=TPM4 PE=4 SV=1	C_familiaris	23	465	15	2.078	0.933819	1	1	1	1	1	1	1	1	1	1	1	1	1	1	1	1	1	1	1	1	1	1	1	1	1	1	1	1	1	1	1	1	1	1	1	1	1	1	1	1	1
High	F1PNS6	Peptidase D OS=Canis lupus familiaris OX=9615 GN=PEPD PE=3 SV=3	C_familiaris	15	143	15	0.499	0.933819	1	1	1	1	1	1	1	1	1	1	1	1	1	1	1	1	1	1	1	1	1	1	1	1	1	1	1	1	1	1	1	1	1	1	1	1	1	1	1	1	1
High	P18067	Ras-related protein Rab-7a OS=Canis lupus familiaris OX=9615 GN=RAB7A PE=1 SV=1	C_familiaris	15	172	15	0.424	0.933819	1	1	1	1	1	1	1	1	1	1	1	1	1	1	1	1	1	1	1	1	1	1	1	1	1	1	1	1	1	1	1	1	1	1	1	1	1	1	1	1	1
High	F1P8B4	Calnexin OS=Canis lupus familiaris OX=9615 GN=CANX PE=3 SV=2	C_familiaris	13	77	13	2.042	0.933819	1	1	1	1	1	1	1	1	1	1	1	1	1	1	1	1	1	1	1	1	1	1	1	1	1	1	1	1	1	1	1	1	1	1	1	1	1	1	1	1	1
High	Q6TEQ7	Annexin A2 OS=Canis lupus familiaris OX=9615 GN=ANXA2 PE=1 SV=1	C_familiaris	13	48	13	0.449	0.933819	1	1	1	1	1	1	1	1	1	1	1	1	1	1	1	1	1	1	1	1	1	1	1	1	1	1	1	1	1	1	1	1	1	1	1	1	1	1	1	1	1
High	E2R8K8	Uncharacterized protein OS=Canis lupus familiaris OX=9615 GN=LOC490399 PE=4 SV=3	C_familiaris	13	570	12	2.004	0.933819	1	1	1	1	1	1	1	1	1	1	1	1	1	1	1	1	1	1	1	1	1	1	1	1	1	1	1	1	1	1	1	1	1	1	1	1	1	1	1	1	1
High	F1P8T1	Angiopoietin like 6 OS=Canis lupus familiaris OX=9615 GN=ANGPTL6 PE=4 SV=3	C_familiaris	12	250	12	1.988	0.933819	1	1	1	1	1	1	1	1	1	1	1	1	1	1	1	1	1	1	1	1	1	1	1	1	1	1	1	1	1	1	1	1	1	1	1	1	1	1	1	1	1
High	A0A5F4CTQ3	LRR binding FLII interacting protein 1 OS=Canis lupus familiaris OX=9615 GN=LRRFIP1 PE=4 SV=1	C_familiaris	13	74	12	1.977	0.933819	1	1	1	1	1	1	1	1	1	1	1	1	1	1	1	1	1	1	1	1	1	1	1	1	1	1	1	1	1	1	1	1	1	1	1	1	1	1	1	1	1
High	F1PZC6	Histidine rich glycoprotein OS=Canis lupus familiaris OX=9615 GN=HRG PE=4 SV=3	C_familiaris	12	727	12	0.516	0.933819	1	1	1	1	1	1	1	1	1	1	1	1	1	1	1	1	1	1	1	1	1	1	1	1	1	1	1	1	1	1	1	1	1	1	1	1	1	1	1	1	1
High	J9JHH5	Joining chain of multimeric IgA and IgM OS=Canis lupus familiaris OX=9615 GN=JCHAIN PE=4 SV=1	C_familiaris	11	1588	11	2.207	0.933819	1	1	1	1	1	1	1	1	1	1	1	1	1	1	1	1	1	1	1	1	1	1	1	1	1	1	1	1	1	1	1	1	1	1	1	1	1	1	1	1	1
High	J9P1G2	Adiponectin A OS=Canis lupus familiaris OX=9615 GN=C1QB PE=4 SV=1	C_familiaris	11	2499	11	1.903	0.933819	1	1	1	1	1	1	1	1	1	1	1	1	1	1	1	1	1	1	1	1	1	1	1	1	1	1	1	1	1	1	1	1	1	1	1	1	1	1	1	1	1
High	F1PP29	Uncharacterized protein OS=Canis lupus familiaris OX=9615 PE=4 SV=2	C_familiaris	11	390	11	0.519	0.933819	1	1	1	1	1	1	1	1	1	1	1	1	1	1	1	1	1	1	1	1	1	1	1	1	1	1	1	1	1	1	1	1	1	1	1	1	1	1	1	1	1
High	E2RPC6	Proteasome subunit beta OS=Canis lupus familiaris OX=9615 GN=PSMB7 PE=2 SV=3	C_familiaris	11	321	11	0.495	0.933819	1	1	1	1	1	1	1	1	1	1	1	1	1	1	1	1	1	1	1	1	1	1	1	1	1	1	1	1	1	1	1	1	1	1	1	1	1	1	1	1	1
High	F1PBK7	AAA domain-containing protein OS=Canis lupus familiaris OX=9615 GN=PSMC3 PE=3 SV=2	C_familiaris	11	68	11	0.48	0.933819	1	1	1	1	1	1	1	1	1	1	1	1	1	1	1	1	1	1	1	1	1	1	1	1	1	1	1	1	1	1	1	1	1	1	1	1	1	1	1	1	1
High	E2RNG3	Carboxypeptidase N subunit 1 OS=Canis lupus familiaris OX=9615 GN=CPN1 PE=4 SV=2	C_familiaris	10	280	10	2.113	0.933819	1	1	1	1	1	1	1	1	1	1	1	1	1	1	1	1	1	1	1	1	1	1	1	1	1	1	1	1	1	1	1	1	1	1	1	1	1	1	1	1	1
High	F1PQN5	Cofilin 1 OS=Canis lupus familiaris OX=9615 GN=CFL1 PE=3 SV=3	C_familiaris	10	420	10	0.491	0.933819	1	1	1	1	1	1	1	1	1	1	1	1	1	1	1	1	1	1	1	1	1	1	1	1	1	1	1	1	1	1	1	1	1	1	1	1	1	1	1	1	1
High	A0A5F4CWA9	Proteasome subunit alpha 2 OS=Canis lupus familiaris OX=9615 GN=PSMA2 PE=4 SV=1	C_familiaris	10	388	10	0.42	0.933819	1	1	1	1	1	1	1	1	1	1	1	1	1	1	1	1	1	1	1	1	1	1	1	1	1	1	1	1	1	1	1	1	1	1	1	1	1	1	1	1	1
High	A0A5F4D6V1	Carboxypeptidase B2 OS=Canis lupus familiaris OX=9615 GN=CPB2 PE=4 SV=1	C_familiaris	10	56	10	0.404	0.933819	1	1	1	1	1	1	1	1	1	1	1	1	1	1	1	1	1	1	1	1	1	1	1	1	1	1	1	1	1	1	1	1	1	1	1	1	1	1	1	1	1
High	Q5W416	Proteasome subunit beta type-8 OS=Canis lupus familiaris OX=9615 GN=PSMB8 PE=1 SV=1	C_familiaris	9	150	9	2.176	0.933819	1	1	1	1	1	1	1	1	1	1	1	1	1	1	1	1	1	1	1	1	1	1	1	1	1	1	1	1	1	1	1	1	1	1	1	1	1	1	1	1	1
High	E2QW82	Matrix metallopeptidase 19 OS=Canis lupus familiaris OX=9615 GN=MMP19 PE=3 SV=3	C_familiaris	9	135	9	1.991	0.933819	1	1	1	1	1	1	1	1	1	1	1	1	1	1	1	1	1	1	1	1	1	1	1	1	1	1	1	1	1	1	1	1	1	1	1	1	1	1	1	1	1
High	E2QX17	Proteasome subunit beta OS=Canis lupus familiaris OX=9615 GN=PSMB3 PE=3 SV=1	C_familiaris	9	272	9	0.427	0.933819	1	1	1	1	1	1	1	1	1	1	1	1	1	1	1	1	1	1	1	1	1	1	1	1	1	1	1	1	1	1	1	1	1	1	1	1	1	1	1	1	1
High	F1PNV5	Coagulation factor XI OS=Canis lupus familiaris OX=9615 GN=KLKB1 PE=3 SV=3	C_familiaris	17	182	8	0.442	0.933819	1	1	1	1	1	1	1	1	1	1	1	1	1	1	1	1	1	1	1	1	1	1	1	1	1	1	1	1	1	1	1	1	1	1	1	1	1	1	1	1	1
High	E2RLK6	Adiponectin F1 OS=Canis lupus familiaris OX=9615 GN=LOC609026 PE=4 SV=1	C_familiaris	6	63	6	0.459	0.933819	1	1	1	1	1	1	1	1	1	1	1	1	1	1	1	1	1	1	1	1	1	1	1	1	1	1	1	1	1	1	1	1	1	1	1	1	1	1	1	1	1
High	F1PHN8	Serpin family A member 4 OS=Canis lupus familiaris OX=9615 GN=SERPINA4 PE=3 SV=3	C_familiaris	6	29	6	0.393	0.933819	1	1	1	1	1	1	1	1	1	1	1	1	1	1	1	1	1	1	1	1	1	1	1	1	1	1	1	1	1	1	1	1	1	1	1	1	1	1	1	1	1
High	A0A5F4D572	Uncharacterized protein OS=Canis lupus familiaris OX=9615 PE=4 SV=1	C_familiaris	5	582	5	2.193	0.933819	1	1	1	1	1	1	1	1	1	1	1	1	1	1	1	1	1	1	1	1	1	1	1	1	1	1	1	1	1	1	1	1	1	1	1	1	1	1	1	1	1
High	E2RTE8	6-pyruvoyltetrahydropterin synthase OS=Canis lupus familiaris OX=9615 GN=PTS PE=4 SV=1	C_familiaris	5	69	5	2.154	0.933819	1	1	1	1	1	1	1	1	1	1	1	1	1	1	1	1	1	1	1	1	1	1	1	1	1	1	1	1	1	1	1	1	1	1	1	1	1	1	1	1	1
High	E2RNL8	Apolipoprotein D OS=Canis lupus familiaris OX=9615 GN=APOD PE=3 SV=3	C_familiaris	5	145	5	1.923	0.933819	1	1	1	1	1	1	1	1	1	1	1	1	1	1	1	1	1	1	1	1	1	1	1	1	1	1	1	1	1	1	1	1	1	1	1	1	1	1	1	1	1
High	E2R0B6	Proteasome subunit beta OS=Canis lupus familiaris OX=9615 GN=PSMB6 PE=3 SV=1	C_familiaris	5	140	5	0.516	0.933819	1	1	1	1	1	1	1	1	1	1	1	1	1	1	1	1	1	1	1	1	1	1	1	1	1	1	1	1	1	1	1	1	1	1	1	1	1	1	1	1	1
High	A0A5F4BYG2	Uncharacterized protein OS=Canis lupus familiaris OX=9615 PE=4 SV=1	C_familiaris	5	1128	4	2.03	0.933819	1	1	1	1	1	1	1	1	1	1	1	1	1	1	1	1	1	1	1	1	1	1	1	1	1	1	1	1	1	1	1	1	1	1	1	1	1	1	1	1	1
High	E2RBC3	Tubulin alpha chain OS=Canis lupus familiaris OX=9615 GN=TUBA4A PE=3 SV=2	C_familiaris	19	547	4	1.986	0.933819	1	1	1	1	1	1	1	1	1	1	1	1	1	1	1	1	1	1	1	1	1	1	1	1	1	1	1	1	1	1	1	1	1	1	1	1	1	1	1	1	1
High	F1PDG4	Uncharacterized protein OS=Canis lupus familiaris OX=9615 GN=UBB PE=4 SV=2	C_familiaris	4	249	4	0.444	0.933819	1	1	1	1	1	1	1	1	1	1	1	1	1	1	1	1	1	1	1	1	1	1	1	1	1	1	1	1	1	1	1	1	1	1	1	1	1	1	1	1	1
High	A0A5F4DJ18	Uncharacterized protein OS=Canis lupus familiaris OX=9615 PE=4 SV=1	C_familiaris	4	1208	3	2.137	0.933819	1	1	1	1	1	1	1	1	1	1	1	1	1	1	1	1	1	1	1	1	1	1	1	1	1	1	1	1	1	1	1	1	1	1	1	1	1	1	1	1	1
High	A0A5F4BR98	Uncharacterized protein OS=Canis lupus familiaris OX=9615 PE=4 SV=1	C_familiaris	10	3535	3	2.127	0.933819	1	1	1	1	1	1	1	1	1	1	1	1	1	1	1	1	1	1	1	1	1	1	1	1	1	1	1	1	1	1	1	1	1	1	1	1	1	1	1	1	1
High	A0A5F4C2R6	Uncharacterized protein OS=Canis lupus familiaris OX=9615 PE=4 SV=1	C_familiaris	8	1839	3	1.96	0.933819	1	1	1	1	1	1	1	1	1	1	1	1	1	1	1	1	1	1	1	1	1	1	1	1	1	1	1	1	1	1	1	1	1	1	1	1	1	1	1	1	1
High	A0A5F4DCX2	Uncharacterized protein OS=Canis lupus familiaris OX=9615 PE=4 SV=1	C_familiaris	4	1166	2	1.974	0.933819	1	1	1	1	1	1	1	1	1	1	1	1	1	1	1	1	1	1	1	1	1	1	1	1	1	1	1	1	1	1	1	1	1	1	1	1	1	1	1	1	1
High	E2RL88	Integrin subunit alpha 6 OS=Canis lupus familiaris OX=9615 GN=ITGA6 PE=3 SV=2	C_familiaris	37	911	37	0.528	0.933889	1	1	1	1	1	1	1	1	1	1	1	1	1	1	1	1	1	1	1	1	1	1	1	1	1	1	1	1	1	1	1	1	1	1	1	1	1	1	1	1	1
High	F1PBI6	Thrombospondin 1 OS=Canis lupus familiaris OX=9615 GN=THBS1 PE=4 SV=3	C_familiaris	51	2559	50	1.81	0.935358	1	1	1	1	1	1	1	1	1	1	1	1	1	1	1	1	1	1	1	1	1	1	1	1	1	1	1	1	1	1	1	1	1	1	1	1	1	1	1	1	1
High	Q95MP7	Ferritin heavy chain OS=Canis lupus familiaris OX=9615 GN=FTH1 PE=2 SV=3	C_familiaris	12	296	12	1.799	0.935358	1	1	1	1	1	1	1	1	1	1	1	1	1	1	1	1	1	1	1	1	1	1	1	1	1	1	1	1	1	1	1	1	1	1	1	1	1	1	1	1	1
High	J9NZT2	Ig-like domain-containing protein OS=Canis lupus familiaris OX=9615 PE=4 SV=2	C_familiaris	9	3072	4	1.836	0.935358	1	1	1	1	1	1	1	1	1	1	1	1	1	1	1	1	1	1	1	1	1	1	1	1	1	1	1	1	1	1	1	1	1	1	1	1	1	1	1	1	1
High	J9P732	EF-hand domain-containing protein OS=Canis lupus familiaris OX=9615 GN=S100A9 PE=3 SV=2	C_familiaris	3	104	3	1.812	0.935358	1	1	1	1	1	1	1	1	1	1	1	1	1	1	1	1	1	1	1	1	1	1	1	1	1	1	1	1	1	1	1	1	1	1	1	1	1	1	1	1	1
High	F2Z4N7	Actin alpha cardiac muscle 1 OS=Canis lupus familiaris OX=9615 GN=ACTC1 PE=3 SV=2	C_familiaris	16	2127	3	0.545	0.935358	1	1	1	1	1	1	1	1	1	1	1	1	1	1	1	1	1	1	1	1	1	1	1	1	1	1	1	1	1	1	1	1	1	1	1	1	1	1	1	1	1
High	A0A5F4CFF9	Fms related tyrosine kinase 4 OS=Canis lupus familiaris OX=9615 GN=FLT4 PE=4 SV=1	C_familiaris	2	19	2	1.797	0.935358	1	1	1	1	1	1	1	1	1	1	1	1	1	1	1	1	1	1	1	1	1	1	1	1	1	1	1	1	1	1	1	1	1	1	1	1	1	1	1	1	1
High	F1PHQ0	Clathrin heavy chain OS=Canis lupus familiaris OX=9615 GN=CLTC PE=3 SV=3	C_familiaris	38	224	38	0.583	0.938246	1	1	1	1	1	1	1	1	1	1	1	1	1	1	1	1	1	1	1	1	1	1	1	1	1	1	1	1	1	1	1	1	1	1	1	1	1	1	1	1	1
High	E2RK64	Fermitin family member 3 OS=Canis lupus familiaris OX=9615 GN=FERMT3 PE=4 SV=2	C_familiaris	25	660	25	0.58	0.938246	1	1	1	1	1	1	1	1	1	1	1	1	1	1	1	1	1	1	1	1	1	1	1	1	1	1	1	1	1	1	1	1	1	1	1	1	1	1	1	1	1
High	E2R7A3	Complement factor I OS=Canis lupus familiaris OX=9615 GN=CFI PE=3 SV=3	C_familiaris	21	1077	20	0.585	0.938246	1	1	1	1	1	1	1	1	1	1	1	1	1	1	1	1	1	1	1	1	1	1	1	1	1	1	1	1	1	1	1	1	1	1	1	1	1	1	1	1	1
High	E2R5H4	Integrin linked kinase OS=Canis lupus familiaris OX=9615 GN=ILK PE=4 SV=1	C_familiaris	18	224	18	1.741	0.938246	1	1	1	1	1	1	1	1	1	1	1	1	1	1	1	1	1	1	1	1	1	1	1	1	1	1	1	1	1	1	1	1	1	1	1	1	1	1	1	1	1
High	A0A5F4CWL0	Uncharacterized protein OS=Canis lupus familiaris OX=9615 GN=CANT1 PE=4 SV=1	C_familiaris	18	980	18	1.653	0.938246	1	1	1	1	1	1	1	1	1	1	1	1	1	1	1	1	1	1	1	1	1	1	1	1	1	1	1	1	1	1	1	1	1	1	1	1	1	1	1	1	1
High	F1Q094	Platelet-activating factor acetylhydrolase OS=Canis lupus familiaris OX=9615 GN=PLA2G7 PE=4 SV=1	C_familiaris	17	194	17	1.665	0.938246	1	1	1	1	1	1	1	1	1	1	1	1	1	1	1	1	1	1	1	1	1	1	1	1	1	1	1	1	1	1	1	1	1	1	1	1	1	1	1	1	1
High	J9P9J6	Uncharacterized protein OS=Canis lupus familiaris OX=9615 PE=4 SV=2	C_familiaris	15	6212	15	1.701	0.938246	1	1	1	1	1	1	1	1	1	1	1	1	1	1	1	1	1	1	1	1	1	1	1	1	1	1	1	1	1	1	1	1	1	1	1	1	1	1	1	1	1
High	J9NUR9	Protein tyrosine phosphatase receptor type J OS=Canis lupus familiaris OX=9615 GN=PTPRJ PE=4 SV=2	C_familiaris	15	61	15	0.557	0.938246	1	1	1	1	1	1	1	1	1	1	1	1	1	1	1	1	1	1	1	1	1	1	1	1	1	1	1	1	1	1	1	1	1	1	1	1	1	1	1	1	1
High	F1PYX9	Serpin family G member 1 OS=Canis lupus familiaris OX=9615 GN=SERPING1 PE=3 SV=3	C_familiaris	14	516	14	0.575	0.938246	1	1	1	1	1	1	1	1	1	1	1	1	1	1	1	1	1	1	1	1	1	1	1	1	1	1	1	1	1	1	1	1	1	1	1	1	1	1	1	1	1
High	Q7YQC6	Heat shock 70 kDa protein 1 OS=Canis lupus familiaris OX=9615 GN=HSPA1 PE=2 SV=1	C_familiaris	22	490	14	0.555	0.938246	1	1	1	1	1	1	1	1	1	1	1	1	1	1	1	1	1	1	1	1	1	1	1	1	1	1	1	1	1	1	1	1	1	1	1	1	1	1	1	1	1
High	A0A5F4DKK2	Attractin OS=Canis lupus familiaris OX=9615 GN=ATRN PE=4 SV=1	C_familiaris	13	176	13	0.564	0.938246	1	1	1	1	1	1	1	1	1	1	1	1	1	1	1	1	1	1	1	1	1	1	1	1	1	1	1	1	1	1	1	1	1	1	1	1	1	1	1	1	1
High	E2RNG2	ATP synthase subunit alpha OS=Canis lupus familiaris OX=9615 GN=ATP5F1A PE=3 SV=2	C_familiaris	11	71	11	1.644	0.938246	1	1	1	1	1	1	1	1	1	1	1	1	1	1	1	1	1	1	1	1	1	1	1	1	1	1	1	1	1	1	1	1	1	1	1	1	1	1	1	1	1
High	A0A5F4CHH4	Pleckstrin OS=Canis lupus familiaris OX=9615 GN=PLEK PE=4 SV=1	C_familiaris	11	208	11	0.551	0.938246	1	1	1	1	1	1	1	1	1	1	1	1	1	1	1	1	1	1	1	1	1	1	1	1	1	1	1	1	1	1	1	1	1	1	1	1	1	1	1	1	1
High	J9P6N4	Tyrosine 3-monooxygenase/tryptophan 5-monooxygenase activation protein eta OS=Canis lupus familiaris OX=9615 GN=YWHAH PE=3 SV=1	C_familiaris	14	294	10	0.587	0.938246	1	1	1	1	1	1	1	1	1	1	1	1	1	1	1	1	1	1	1	1	1	1	1	1	1	1	1	1	1	1	1	1	1	1	1	1	1	1	1	1	1
High	E2RE03	Cadherin 5 OS=Canis lupus familiaris OX=9615 GN=CDH5 PE=4 SV=3	C_familiaris	7	40	7	1.639	0.938246	1	1	1	1	1	1	1	1	1	1	1	1	1	1	1	1	1	1	1	1	1	1	1	1	1	1	1	1	1	1	1	1	1	1	1	1	1	1	1	1	1
High	F1PUB5	Proteasome endopeptidase complex OS=Canis lupus familiaris OX=9615 GN=PSMA7 PE=3 SV=3	C_familiaris	8	429	5	0.558	0.938246	1	1	1	1	1	1	1	1	1	1	1	1	1	1	1	1	1	1	1	1	1	1	1	1	1	1	1	1	1	1	1	1	1	1	1	1	1	1	1	1	1
High	J9PAD1	Uncharacterized protein OS=Canis lupus familiaris OX=9615 PE=4 SV=2	C_familiaris	80	5962	4	0.554	0.938246	1	1	1	1	1	1	1	1	1	1	1	1	1	1	1	1	1	1	1	1	1	1	1	1	1	1	1	1	1	1	1	1	1	1	1	1	1	1	1	1	1
High	A0A5F4CWH9	Tripeptidyl peptidase 2 OS=Canis lupus familiaris OX=9615 GN=TPP2 PE=4 SV=1	C_familiaris	18	59	18	0.594	0.93899	1	1	1	1	1	1	1	1	1	1	1	1	1	1	1	1	1	1	1	1	1	1	1	1	1	1	1	1	1	1	1	1	1	1	1	1	1	1	1	1	1
High	A0A5F4D3V5	Tubulin beta 1 class VI OS=Canis lupus familiaris OX=9615 GN=TUBB1 PE=4 SV=1	C_familiaris	21	543	17	1.64	0.93899	1	1	1	1	1	1	1	1	1	1	1	1	1	1	1	1	1	1	1	1	1	1	1	1	1	1	1	1	1	1	1	1	1	1	1	1	1	1	1	1	1
High	F1PKR3	Vinculin OS=Canis lupus familiaris OX=9615 GN=VCL PE=4 SV=3	C_familiaris	57	948	57	1.626	0.940442	1	1	1	1	1	1	1	1	1	1	1	1	1	1	1	1	1	1	1	1	1	1	1	1	1	1	1	1	1	1	1	1	1	1	1	1	1	1	1	1	1
High	F1PBL1	14_3_3 domain-containing protein OS=Canis lupus familiaris OX=9615 GN=YWHAZ PE=3 SV=3	C_familiaris	13	523	9	0.595	0.940442	1	1	1	1	1	1	1	1	1	1	1	1	1	1	1	1	1	1	1	1	1	1	1	1	1	1	1	1	1	1	1	1	1	1	1	1	1	1	1	1	1
High	A0A5F4C4W3	Uncharacterized protein OS=Canis lupus familiaris OX=9615 PE=4 SV=1	C_familiaris	9	95	3	0.602	0.941685	1	1	1	1	1	1	1	1	1	1	1	1	1	1	1	1	1	1	1	1	1	1	1	1	1	1	1	1	1	1	1	1	1	1	1	1	1	1	1	1	1
High	F6Y713	Alpha-1-acid glycoprotein OS=Canis lupus familiaris OX=9615 GN=LOC100685620 PE=3 SV=1	C_familiaris	6	118	6	0.603	0.942375	1	1	1	1	1	1	1	1	1	1	1	1	1	1	1	1	1	1	1	1	1	1	1	1	1	1	1	1	1	1	1	1	1	1	1	1	1	1	1	1	1
High	A0A5F4CNZ1	Complement C6 OS=Canis lupus familiaris OX=9615 GN=C6 PE=4 SV=1	C_familiaris	36	535	36	1.606	0.944788	1	1	1	1	1	1	1	1	1	1	1	1	1	1	1	1	1	1	1	1	1	1	1	1	1	1	1	1	1	1	1	1	1	1	1	1	1	1	1	1	1
High	A0A5F4BY85	Glycosylphosphatidylinositol specific phospholipase D1 OS=Canis lupus familiaris OX=9615 GN=GPLD1 PE=4 SV=1	C_familiaris	28	843	28	0.621	0.944788	1	1	1	1	1	1	1	1	1	1	1	1	1	1	1	1	1	1	1	1	1	1	1	1	1	1	1	1	1	1	1	1	1	1	1	1	1	1	1	1	1
High	E2R141	Complement C8 beta chain OS=Canis lupus familiaris OX=9615 GN=C8B PE=4 SV=1	C_familiaris	23	410	23	0.619	0.944788	1	1	1	1	1	1	1	1	1	1	1	1	1	1	1	1	1	1	1	1	1	1	1	1	1	1	1	1	1	1	1	1	1	1	1	1	1	1	1	1	1
High	J9P4J8	Complement factor H related 5 OS=Canis lupus familiaris OX=9615 GN=CFHR5 PE=4 SV=2	C_familiaris	19	264	19	1.59	0.944788	1	1	1	1	1	1	1	1	1	1	1	1	1	1	1	1	1	1	1	1	1	1	1	1	1	1	1	1	1	1	1	1	1	1	1	1	1	1	1	1	1
High	E2RH18	Complement factor properdin OS=Canis lupus familiaris OX=9615 GN=CFP PE=4 SV=1	C_familiaris	15	1188	15	1.597	0.944788	1	1	1	1	1	1	1	1	1	1	1	1	1	1	1	1	1	1	1	1	1	1	1	1	1	1	1	1	1	1	1	1	1	1	1	1	1	1	1	1	1
High	E2RSI6	FERM domain-containing protein OS=Canis lupus familiaris OX=9615 GN=EZR PE=4 SV=1	C_familiaris	23	252	15	0.623	0.944788	1	1	1	1	1	1	1	1	1	1	1	1	1	1	1	1	1	1	1	1	1	1	1	1	1	1	1	1	1	1	1	1	1	1	1	1	1	1	1	1	1
High	J9PAA4	Carboxypeptidase N subunit 2 OS=Canis lupus familiaris OX=9615 GN=CPN2 PE=4 SV=1	C_familiaris	14	409	14	1.591	0.944788	1	1	1	1	1	1	1	1	1	1	1	1	1	1	1	1	1	1	1	1	1	1	1	1	1	1	1	1	1	1	1	1	1	1	1	1	1	1	1	1	1
High	E2RPW3	Paraoxonase 3 OS=Canis lupus familiaris OX=9615 GN=PON3 PE=4 SV=3	C_familiaris	13	673	13	0.626	0.944788	1	1	1	1	1	1	1	1	1	1	1	1	1	1	1	1	1	1	1	1	1	1	1	1	1	1	1	1	1	1	1	1	1	1	1	1	1	1	1	1	1
High	E2RAF1	Uncharacterized protein OS=Canis lupus familiaris OX=9615 GN=CKMT1A PE=3 SV=1	C_familiaris	13	72	13	0.607	0.944788	1	1	1	1	1	1	1	1	1	1	1	1	1	1	1	1	1	1	1	1	1	1	1	1	1	1	1	1	1	1	1	1	1	1	1	1	1	1	1	1	1
High	J9P884	Versican OS=Canis lupus familiaris OX=9615 GN=VCAN PE=4 SV=1	C_familiaris	11	83	11	1.571	0.944788	1	1	1	1	1	1	1	1	1	1	1	1	1	1	1	1	1	1	1	1	1	1	1	1	1	1	1	1	1	1	1	1	1	1	1	1	1	1	1	1	1
High	E2QW60	Lectin, mannose binding 1 OS=Canis lupus familiaris OX=9615 GN=LMAN1 PE=4 SV=2	C_familiaris	10	130	10	1.599	0.944788	1	1	1	1	1	1	1	1	1	1	1	1	1	1	1	1	1	1	1	1	1	1	1	1	1	1	1	1	1	1	1	1	1	1	1	1	1	1	1	1	1
High	F1PQ85	Mannan binding lectin serine peptidase 1 OS=Canis lupus familiaris OX=9615 GN=MASP1 PE=3 SV=3	C_familiaris	26	1092	10	1.556	0.944788	1	1	1	1	1	1	1	1	1	1	1	1	1	1	1	1	1	1	1	1	1	1	1	1	1	1	1	1	1	1	1	1	1	1	1	1	1	1	1	1	1
High	F1P7F8	Zyxin OS=Canis lupus familiaris OX=9615 GN=ZYX PE=4 SV=3	C_familiaris	9	203	9	1.578	0.944788	1	1	1	1	1	1	1	1	1	1	1	1	1	1	1	1	1	1	1	1	1	1	1	1	1	1	1	1	1	1	1	1	1	1	1	1	1	1	1	1	1
High	E2R8A7	Collectin subfamily member 11 OS=Canis lupus familiaris OX=9615 GN=COLEC11 PE=4 SV=3	C_familiaris	8	457	8	1.583	0.944788	1	1	1	1	1	1	1	1	1	1	1	1	1	1	1	1	1	1	1	1	1	1	1	1	1	1	1	1	1	1	1	1	1	1	1	1	1	1	1	1	1
High	A0A5F4CS96	Uncharacterized protein OS=Canis lupus familiaris OX=9615 GN=LOC106557476 PE=4 SV=1	C_familiaris	21	607	5	1.544	0.944788	1	1	1	1	1	1	1	1	1	1	1	1	1	1	1	1	1	1	1	1	1	1	1	1	1	1	1	1	1	1	1	1	1	1	1	1	1	1	1	1	1
High	H9GWR8	Ig-like domain-containing protein OS=Canis lupus familiaris OX=9615 PE=4 SV=2	C_familiaris	11	10462	3	1.586	0.944788	1	1	1	1	1	1	1	1	1	1	1	1	1	1	1	1	1	1	1	1	1	1	1	1	1	1	1	1	1	1	1	1	1	1	1	1	1	1	1	1	1
High	J9PBN6	Uncharacterized protein OS=Canis lupus familiaris OX=9615 GN=LOC477699 PE=4 SV=1	C_familiaris	87	16663	3	0.618	0.944788	1	1	1	1	1	1	1	1	1	1	1	1	1	1	1	1	1	1	1	1	1	1	1	1	1	1	1	1	1	1	1	1	1	1	1	1	1	1	1	1	1
High	F6UME0	Uncharacterized protein OS=Canis lupus familiaris OX=9615 GN=LOC477699 PE=4 SV=1	C_familiaris	83	14532	77	1.54	0.946495	1	1	1	1	1	1	1	1	1	1	1	1	1	1	1	1	1	1	1	1	1	1	1	1	1	1	1	1	1	1	1	1	1	1	1	1	1	1	1	1	1
High	F1PW10	Transforming growth factor beta induced OS=Canis lupus familiaris OX=9615 GN=TGFBI PE=4 SV=3	C_familiaris	19	202	19	1.514	0.952439	1	1	1	1	1	1	1	1	1	1	1	1	1	1	1	1	1	1	1	1	1	1	1	1	1	1	1	1	1	1	1	1	1	1	1	1	1	1	1	1	1
High	A0A5F4C175	Platelet and endothelial cell adhesion molecule 1 OS=Canis lupus familiaris OX=9615 GN=PECAM1 PE=4 SV=1	C_familiaris	13	101	13	0.644	0.952439	1	1	1	1	1	1	1	1	1	1	1	1	1	1	1	1	1	1	1	1	1	1	1	1	1	1	1	1	1	1	1	1	1	1	1	1	1	1	1	1	1
High	F1Q1K9	Hyaluronan binding protein 2 OS=Canis lupus familiaris OX=9615 GN=HABP2 PE=3 SV=3	C_familiaris	12	180	12	0.638	0.952439	1	1	1	1	1	1	1	1	1	1	1	1	1	1	1	1	1	1	1	1	1	1	1	1	1	1	1	1	1	1	1	1	1	1	1	1	1	1	1	1	1
High	A0A5F4DDK9	Purine nucleoside phosphorylase OS=Canis lupus familiaris OX=9615 GN=PNP PE=4 SV=1	C_familiaris	9	58	9	1.484	0.952439	1	1	1	1	1	1	1	1	1	1	1	1	1	1	1	1	1	1	1	1	1	1	1	1	1	1	1	1	1	1	1	1	1	1	1	1	1	1	1	1	1
High	J9P983	Exostosin like glycosyltransferase 2 OS=Canis lupus familiaris OX=9615 GN=EXTL2 PE=4 SV=2	C_familiaris	8	182	6	0.628	0.952439	1	1	1	1	1	1	1	1	1	1	1	1	1	1	1	1	1	1	1	1	1	1	1	1	1	1	1	1	1	1	1	1	1	1	1	1	1	1	1	1	1
High	E2QY07	Actinin alpha 1 OS=Canis lupus familiaris OX=9615 GN=ACTN1 PE=4 SV=1	C_familiaris	47	998	29	1.477	0.952461	1	1	1	1	1	1	1	1	1	1	1	1	1	1	1	1	1	1	1	1	1	1	1	1	1	1	1	1	1	1	1	1	1	1	1	1	1	1	1	1	1
High	P54714	Triosephosphate isomerase OS=Canis lupus familiaris OX=9615 GN=TPI1 PE=1 SV=3	C_familiaris	17	255	17	0.657	0.952461	1	1	1	1	1	1	1	1	1	1	1	1	1	1	1	1	1	1	1	1	1	1	1	1	1	1	1	1	1	1	1	1	1	1	1	1	1	1	1	1	1
High	A0A5F4CZY7	Uncharacterized protein OS=Canis lupus familiaris OX=9615 GN=PSMA1 PE=4 SV=1	C_familiaris	15	607	15	0.659	0.952461	1	1	1	1	1	1	1	1	1	1	1	1	1	1	1	1	1	1	1	1	1	1	1	1	1	1	1	1	1	1	1	1	1	1	1	1	1	1	1	1	1
High	E2RRC9	Phosphoglycerate kinase OS=Canis lupus familiaris OX=9615 GN=PGK1 PE=3 SV=1	C_familiaris	19	204	14	0.661	0.952461	1	1	1	1	1	1	1	1	1	1	1	1	1	1	1	1	1	1	1	1	1	1	1	1	1	1	1	1	1	1	1	1	1	1	1	1	1	1	1	1	1
High	A0A5F4D8T6	Uncharacterized protein OS=Canis lupus familiaris OX=9615 GN=PAICS PE=4 SV=1	C_familiaris	10	65	10	0.641	0.952461	1	1	1	1	1	1	1	1	1	1	1	1	1	1	1	1	1	1	1	1	1	1	1	1	1	1	1	1	1	1	1	1	1	1	1	1	1	1	1	1	1
High	J9NWG4	C-type lectin domain-containing protein OS=Canis lupus familiaris OX=9615 GN=MBL2 PE=4 SV=2	C_familiaris	8	589	8	1.471	0.952461	1	1	1	1	1	1	1	1	1	1	1	1	1	1	1	1	1	1	1	1	1	1	1	1	1	1	1	1	1	1	1	1	1	1	1	1	1	1	1	1	1
High	E2RBR6	Proteasome subunit beta OS=Canis lupus familiaris OX=9615 GN=PSMB4 PE=3 SV=1	C_familiaris	8	384	8	0.655	0.952461	1	1	1	1	1	1	1	1	1	1	1	1	1	1	1	1	1	1	1	1	1	1	1	1	1	1	1	1	1	1	1	1	1	1	1	1	1	1	1	1	1
High	F6XKC0	Complement C8 gamma chain OS=Canis lupus familiaris OX=9615 GN=C8G PE=3 SV=2	C_familiaris	5	58	5	0.622	0.952461	1	1	1	1	1	1	1	1	1	1	1	1	1	1	1	1	1	1	1	1	1	1	1	1	1	1	1	1	1	1	1	1	1	1	1	1	1	1	1	1	1
High	P56595	Apolipoprotein C-I OS=Canis lupus familiaris OX=9615 GN=APOC1 PE=1 SV=1	C_familiaris	3	141	3	0.657	0.952461	1	1	1	1	1	1	1	1	1	1	1	1	1	1	1	1	1	1	1	1	1	1	1	1	1	1	1	1	1	1	1	1	1	1	1	1	1	1	1	1	1
High	F1Q418	Inter-alpha-trypsin inhibitor heavy chain 1 OS=Canis lupus familiaris OX=9615 GN=ITIH1 PE=4 SV=2	C_familiaris	27	1628	3	0.652	0.952461	1	1	1	1	1	1	1	1	1	1	1	1	1	1	1	1	1	1	1	1	1	1	1	1	1	1	1	1	1	1	1	1	1	1	1	1	1	1	1	1	1
High	F1P8N6	Endoplasmin OS=Canis lupus familiaris OX=9615 GN=HSP90B1 PE=3 SV=1	C_familiaris	23	298	22	1.462	0.952597	1	1	1	1	1	1	1	1	1	1	1	1	1	1	1	1	1	1	1	1	1	1	1	1	1	1	1	1	1	1	1	1	1	1	1	1	1	1	1	1	1
High	H9GWG4	Inter-alpha-trypsin inhibitor heavy chain 3 OS=Canis lupus familiaris OX=9615 GN=ITIH3 PE=4 SV=3	C_familiaris	20	294	16	1.465	0.952597	1	1	1	1	1	1	1	1	1	1	1	1	1	1	1	1	1	1	1	1	1	1	1	1	1	1	1	1	1	1	1	1	1	1	1	1	1	1	1	1	1
High	A0A5F4DCB6	Nucleosome assembly protein 1 like 1 OS=Canis lupus familiaris OX=9615 GN=NAP1L1 PE=4 SV=1	C_familiaris	6	62	5	0.635	0.952597	1	1	1	1	1	1	1	1	1	1	1	1	1	1	1	1	1	1	1	1	1	1	1	1	1	1	1	1	1	1	1	1	1	1	1	1	1	1	1	1	1
High	E2R4Q1	LDL receptor related protein 1 OS=Canis lupus familiaris OX=9615 GN=LRP1 PE=4 SV=3	C_familiaris	70	298	70	0.67	0.952731	1	1	1	1	1	1	1	1	1	1	1	1	1	1	1	1	1	1	1	1	1	1	1	1	1	1	1	1	1	1	1	1	1	1	1	1	1	1	1	1	1
High	P19006	Haptoglobin OS=Canis lupus familiaris OX=9615 GN=HP PE=1 SV=2	C_familiaris	23	3583	23	1.43	0.952731	1	1	1	1	1	1	1	1	1	1	1	1	1	1	1	1	1	1	1	1	1	1	1	1	1	1	1	1	1	1	1	1	1	1	1	1	1	1	1	1	1
High	E2QZ98	Angiopoietin like 3 OS=Canis lupus familiaris OX=9615 GN=ANGPTL3 PE=4 SV=1	C_familiaris	19	174	19	1.444	0.952731	1	1	1	1	1	1	1	1	1	1	1	1	1	1	1	1	1	1	1	1	1	1	1	1	1	1	1	1	1	1	1	1	1	1	1	1	1	1	1	1	1
High	F1PVW0	L-lactate dehydrogenase OS=Canis lupus familiaris OX=9615 GN=LDHA PE=3 SV=2	C_familiaris	16	304	15	1.444	0.952731	1	1	1	1	1	1	1	1	1	1	1	1	1	1	1	1	1	1	1	1	1	1	1	1	1	1	1	1	1	1	1	1	1	1	1	1	1	1	1	1	1
High	F1PUM6	SMB domain-containing protein OS=Canis lupus familiaris OX=9615 GN=VTN PE=4 SV=2	C_familiaris	14	510	14	1.447	0.952731	1	1	1	1	1	1	1	1	1	1	1	1	1	1	1	1	1	1	1	1	1	1	1	1	1	1	1	1	1	1	1	1	1	1	1	1	1	1	1	1	1
High	E2RGG9	Tryptophanyl-tRNA synthetase OS=Canis lupus familiaris OX=9615 GN=WARS1 PE=3 SV=2	C_familiaris	14	154	14	1.436	0.952731	1	1	1	1	1	1	1	1	1	1	1	1	1	1	1	1	1	1	1	1	1	1	1	1	1	1	1	1	1	1	1	1	1	1	1	1	1	1	1	1	1
High	F1PAG6	Arp2/3 complex 34 kDa subunit OS=Canis lupus familiaris OX=9615 GN=ARPC2 PE=3 SV=3	C_familiaris	14	66	14	0.677	0.952731	1	1	1	1	1	1	1	1	1	1	1	1	1	1	1	1	1	1	1	1	1	1	1	1	1	1	1	1	1	1	1	1	1	1	1	1	1	1	1	1	1
High	E2QYX1	Phosphoglycerate mutase OS=Canis lupus familiaris OX=9615 GN=BPGM PE=3 SV=1	C_familiaris	7	128	7	0.675	0.952731	1	1	1	1	1	1	1	1	1	1	1	1	1	1	1	1	1	1	1	1	1	1	1	1	1	1	1	1	1	1	1	1	1	1	1	1	1	1	1	1	1
High	A0A5F4D2F2	Uncharacterized protein OS=Canis lupus familiaris OX=9615 PE=4 SV=1	C_familiaris	8	3168	3	1.454	0.952731	1	1	1	1	1	1	1	1	1	1	1	1	1	1	1	1	1	1	1	1	1	1	1	1	1	1	1	1	1	1	1	1	1	1	1	1	1	1	1	1	1
High	E2QUY1	RAS p21 protein activator 3 OS=Canis lupus familiaris OX=9615 GN=RASA3 PE=4 SV=2	C_familiaris	21	72	21	1.397	0.952848	1	1	1	1	1	1	1	1	1	1	1	1	1	1	1	1	1	1	1	1	1	1	1	1	1	1	1	1	1	1	1	1	1	1	1	1	1	1	1	1	1
High	A0A5F4CWK7	Uncharacterized protein OS=Canis lupus familiaris OX=9615 PE=4 SV=1	C_familiaris	4	2504	2	1.422	0.952848	1	1	1	1	1	1	1	1	1	1	1	1	1	1	1	1	1	1	1	1	1	1	1	1	1	1	1	1	1	1	1	1	1	1	1	1	1	1	1	1	1
High	J9PBI1	LIM and senescent cell antigen-like-containing domain protein OS=Canis lupus familiaris OX=9615 GN=LIMS1 PE=4 SV=2	C_familiaris	10	171	10	1.413	0.95312	1	1	1	1	1	1	1	1	1	1	1	1	1	1	1	1	1	1	1	1	1	1	1	1	1	1	1	1	1	1	1	1	1	1	1	1	1	1	1	1	1
High	F1PSC2	Talin 1 OS=Canis lupus familiaris OX=9615 GN=TLN1 PE=4 SV=3	C_familiaris	119	2582	119	1.381	0.953219	1	1	1	1	1	1	1	1	1	1	1	1	1	1	1	1	1	1	1	1	1	1	1	1	1	1	1	1	1	1	1	1	1	1	1	1	1	1	1	1	1
High	F1PGM1	Complement C3 OS=Canis lupus familiaris OX=9615 GN=C3 PE=4 SV=2	C_familiaris	103	16449	94	0.712	0.953219	1	1	1	1	1	1	1	1	1	1	1	1	1	1	1	1	1	1	1	1	1	1	1	1	1	1	1	1	1	1	1	1	1	1	1	1	1	1	1	1	1
High	F1PN98	Coagulation factor V OS=Canis lupus familiaris OX=9615 GN=F5 PE=3 SV=2	C_familiaris	56	1738	56	0.71	0.953219	1	1	1	1	1	1	1	1	1	1	1	1	1	1	1	1	1	1	1	1	1	1	1	1	1	1	1	1	1	1	1	1	1	1	1	1	1	1	1	1	1
High	F1PR31	Collagen type VI alpha 3 chain OS=Canis lupus familiaris OX=9615 GN=COL6A3 PE=4 SV=3	C_familiaris	52	314	52	1.342	0.953219	1	1	1	1	1	1	1	1	1	1	1	1	1	1	1	1	1	1	1	1	1	1	1	1	1	1	1	1	1	1	1	1	1	1	1	1	1	1	1	1	1
High	F6UZV8	Calpain 1 OS=Canis lupus familiaris OX=9615 GN=CAPN1 PE=3 SV=2	C_familiaris	22	115	22	0.693	0.953219	1	1	1	1	1	1	1	1	1	1	1	1	1	1	1	1	1	1	1	1	1	1	1	1	1	1	1	1	1	1	1	1	1	1	1	1	1	1	1	1	1
High	F1PRC5	Aamy domain-containing protein OS=Canis lupus familiaris OX=9615 GN=SLC3A2 PE=4 SV=2	C_familiaris	16	79	16	0.71	0.953219	1	1	1	1	1	1	1	1	1	1	1	1	1	1	1	1	1	1	1	1	1	1	1	1	1	1	1	1	1	1	1	1	1	1	1	1	1	1	1	1	1
High	F1P679	Actin related protein 3 OS=Canis lupus familiaris OX=9615 GN=ACTR3 PE=3 SV=2	C_familiaris	15	235	15	1.344	0.953219	1	1	1	1	1	1	1	1	1	1	1	1	1	1	1	1	1	1	1	1	1	1	1	1	1	1	1	1	1	1	1	1	1	1	1	1	1	1	1	1	1
High	A0A5F4BTV9	Aldolase, fructose-bisphosphate B OS=Canis lupus familiaris OX=9615 GN=ALDOB PE=4 SV=1	C_familiaris	13	191	12	1.382	0.953219	1	1	1	1	1	1	1	1	1	1	1	1	1	1	1	1	1	1	1	1	1	1	1	1	1	1	1	1	1	1	1	1	1	1	1	1	1	1	1	1	1
High	A0A5F4D2T1	Actin related protein 2/3 complex subunit 1B OS=Canis lupus familiaris OX=9615 GN=ARPC1B PE=4 SV=1	C_familiaris	12	151	12	1.368	0.953219	1	1	1	1	1	1	1	1	1	1	1	1	1	1	1	1	1	1	1	1	1	1	1	1	1	1	1	1	1	1	1	1	1	1	1	1	1	1	1	1	1
High	Q28260	Vascular cell adhesion protein 1 OS=Canis lupus familiaris OX=9615 GN=VCAM1 PE=2 SV=1	C_familiaris	12	42	12	1.341	0.953219	1	1	1	1	1	1	1	1	1	1	1	1	1	1	1	1	1	1	1	1	1	1	1	1	1	1	1	1	1	1	1	1	1	1	1	1	1	1	1	1	1
High	E2RMN2	Proteasome subunit alpha type OS=Canis lupus familiaris OX=9615 GN=PSMA6 PE=3 SV=1	C_familiaris	12	472	12	0.697	0.953219	1	1	1	1	1	1	1	1	1	1	1	1	1	1	1	1	1	1	1	1	1	1	1	1	1	1	1	1	1	1	1	1	1	1	1	1	1	1	1	1	1
High	E2QXY7	Actin-related protein 2 OS=Canis lupus familiaris OX=9615 GN=ACTR2 PE=3 SV=3	C_familiaris	10	132	10	1.346	0.953219	1	1	1	1	1	1	1	1	1	1	1	1	1	1	1	1	1	1	1	1	1	1	1	1	1	1	1	1	1	1	1	1	1	1	1	1	1	1	1	1	1
High	E2QX53	Glucosamine-6-phosphate isomerase OS=Canis lupus familiaris OX=9615 GN=GNPDA1 PE=3 SV=1	C_familiaris	12	234	8	0.714	0.953219	1	1	1	1	1	1	1	1	1	1	1	1	1	1	1	1	1	1	1	1	1	1	1	1	1	1	1	1	1	1	1	1	1	1	1	1	1	1	1	1	1
High	J9PAX5	Ig-like domain-containing protein OS=Canis lupus familiaris OX=9615 PE=4 SV=2	C_familiaris	9	2926	7	1.39	0.953219	1	1	1	1	1	1	1	1	1	1	1	1	1	1	1	1	1	1	1	1	1	1	1	1	1	1	1	1	1	1	1	1	1	1	1	1	1	1	1	1	1
High	J9P028	Glutathione peroxidase OS=Canis lupus familiaris OX=9615 GN=GPX3 PE=3 SV=2	C_familiaris	7	413	7	0.695	0.953219	1	1	1	1	1	1	1	1	1	1	1	1	1	1	1	1	1	1	1	1	1	1	1	1	1	1	1	1	1	1	1	1	1	1	1	1	1	1	1	1	1
High	A0A5F4DFV6	Fc receptor like 4 OS=Canis lupus familiaris OX=9615 GN=FCRL4 PE=4 SV=1	C_familiaris	2	174	2	1.397	0.953219	1	1	1	1	1	1	1	1	1	1	1	1	1	1	1	1	1	1	1	1	1	1	1	1	1	1	1	1	1	1	1	1	1	1	1	1	1	1	1	1	1
High	F1PNY2	Immunoglobulin kappa constant OS=Canis lupus familiaris OX=9615 GN=IGKC PE=4 SV=3	C_familiaris	8	8604	8	1.332	0.955635	1	1	1	1	1	1	1	1	1	1	1	1	1	1	1	1	1	1	1	1	1	1	1	1	1	1	1	1	1	1	1	1	1	1	1	1	1	1	1	1	1
High	H9GWY3	Inter-alpha-trypsin inhibitor heavy chain 4 OS=Canis lupus familiaris OX=9615 GN=ITIH4 PE=4 SV=3	C_familiaris	43	1496	43	1.329	0.956644	1	1	1	1	1	1	1	1	1	1	1	1	1	1	1	1	1	1	1	1	1	1	1	1	1	1	1	1	1	1	1	1	1	1	1	1	1	1	1	1	1
High	A0A5F4DKI9	Coagulation factor VIII OS=Canis lupus familiaris OX=9615 GN=F8 PE=4 SV=1	C_familiaris	51	251	51	1.321	0.957455	1	1	1	1	1	1	1	1	1	1	1	1	1	1	1	1	1	1	1	1	1	1	1	1	1	1	1	1	1	1	1	1	1	1	1	1	1	1	1	1	1
High	E2QWN7	Lymphocyte cytosolic protein 1 OS=Canis lupus familiaris OX=9615 GN=LCP1 PE=4 SV=2	C_familiaris	31	482	29	1.311	0.957455	1	1	1	1	1	1	1	1	1	1	1	1	1	1	1	1	1	1	1	1	1	1	1	1	1	1	1	1	1	1	1	1	1	1	1	1	1	1	1	1	1
High	A0A5F4CHN8	Thrombospondin 4 OS=Canis lupus familiaris OX=9615 GN=THBS4 PE=4 SV=1	C_familiaris	29	1015	25	1.314	0.957455	1	1	1	1	1	1	1	1	1	1	1	1	1	1	1	1	1	1	1	1	1	1	1	1	1	1	1	1	1	1	1	1	1	1	1	1	1	1	1	1	1
High	A0A5F4CNE2	Cartilage oligomeric matrix protein OS=Canis lupus familiaris OX=9615 GN=COMP PE=4 SV=1	C_familiaris	27	1003	24	1.323	0.957455	1	1	1	1	1	1	1	1	1	1	1	1	1	1	1	1	1	1	1	1	1	1	1	1	1	1	1	1	1	1	1	1	1	1	1	1	1	1	1	1	1
High	E2RD86	Protein disulfide-isomerase OS=Canis lupus familiaris OX=9615 GN=PDIA3 PE=3 SV=1	C_familiaris	21	174	21	1.312	0.957455	1	1	1	1	1	1	1	1	1	1	1	1	1	1	1	1	1	1	1	1	1	1	1	1	1	1	1	1	1	1	1	1	1	1	1	1	1	1	1	1	1
High	E2RQF8	Extracellular matrix protein 1 OS=Canis lupus familiaris OX=9615 GN=ECM1 PE=4 SV=3	C_familiaris	18	277	18	0.739	0.957455	1	1	1	1	1	1	1	1	1	1	1	1	1	1	1	1	1	1	1	1	1	1	1	1	1	1	1	1	1	1	1	1	1	1	1	1	1	1	1	1	1
High	F1P7P3	F-actin-capping protein subunit alpha OS=Canis lupus familiaris OX=9615 GN=CAPZA1 PE=3 SV=2	C_familiaris	11	163	9	0.741	0.957455	1	1	1	1	1	1	1	1	1	1	1	1	1	1	1	1	1	1	1	1	1	1	1	1	1	1	1	1	1	1	1	1	1	1	1	1	1	1	1	1	1
High	F6USM4	Mannan binding lectin serine peptidase 2 OS=Canis lupus familiaris OX=9615 GN=MASP2 PE=3 SV=1	C_familiaris	18	89	18	1.306	0.960428	1	1	1	1	1	1	1	1	1	1	1	1	1	1	1	1	1	1	1	1	1	1	1	1	1	1	1	1	1	1	1	1	1	1	1	1	1	1	1	1	1
High	F1PFM6	Collagen type VI alpha 1 chain OS=Canis lupus familiaris OX=9615 GN=COL6A1 PE=4 SV=2	C_familiaris	17	353	9	0.745	0.960428	1	1	1	1	1	1	1	1	1	1	1	1	1	1	1	1	1	1	1	1	1	1	1	1	1	1	1	1	1	1	1	1	1	1	1	1	1	1	1	1	1
High	E2QZN8	Pentraxin 3 OS=Canis lupus familiaris OX=9615 GN=PTX3 PE=4 SV=2	C_familiaris	17	539	17	1.305	0.96048	1	1	1	1	1	1	1	1	1	1	1	1	1	1	1	1	1	1	1	1	1	1	1	1	1	1	1	1	1	1	1	1	1	1	1	1	1	1	1	1	1
High	A0A5F4D3V6	Integrin subunit beta 2 OS=Canis lupus familiaris OX=9615 GN=ITGB2 PE=4 SV=1	C_familiaris	14	87	14	1.285	0.961582	1	1	1	1	1	1	1	1	1	1	1	1	1	1	1	1	1	1	1	1	1	1	1	1	1	1	1	1	1	1	1	1	1	1	1	1	1	1	1	1	1
High	A0A5F4DAX5	Uncharacterized protein OS=Canis lupus familiaris OX=9615 PE=4 SV=1	C_familiaris	4	604	3	1.297	0.962399	1	1	1	1	1	1	1	1	1	1	1	1	1	1	1	1	1	1	1	1	1	1	1	1	1	1	1	1	1	1	1	1	1	1	1	1	1	1	1	1	1
High	F1PG39	Inter-alpha-trypsin inhibitor heavy chain 2 OS=Canis lupus familiaris OX=9615 GN=ITIH2 PE=4 SV=3	C_familiaris	25	1543	25	0.75	0.962465	1	1	1	1	1	1	1	1	1	1	1	1	1	1	1	1	1	1	1	1	1	1	1	1	1	1	1	1	1	1	1	1	1	1	1	1	1	1	1	1	1
High	A0A5F4C6Q3	Amine oxidase copper containing 3 OS=Canis lupus familiaris OX=9615 GN=AOC3 PE=4 SV=1	C_familiaris	9	133	9	1.295	0.96288	1	1	1	1	1	1	1	1	1	1	1	1	1	1	1	1	1	1	1	1	1	1	1	1	1	1	1	1	1	1	1	1	1	1	1	1	1	1	1	1	1
High	A0A5F4BNS1	Filamin C OS=Canis lupus familiaris OX=9615 GN=FLNC PE=4 SV=1	C_familiaris	29	322	17	1.29	0.964054	1	1	1	1	1	1	1	1	1	1	1	1	1	1	1	1	1	1	1	1	1	1	1	1	1	1	1	1	1	1	1	1	1	1	1	1	1	1	1	1	1
High	Q28294	Guanine nucleotide-binding protein G(q) subunit alpha OS=Canis lupus familiaris OX=9615 GN=GNAQ PE=2 SV=2	C_familiaris	17	63	16	0.729	0.964054	1	1	1	1	1	1	1	1	1	1	1	1	1	1	1	1	1	1	1	1	1	1	1	1	1	1	1	1	1	1	1	1	1	1	1	1	1	1	1	1	1
High	F1PHY1	Collagen alpha-2(I) chain OS=Canis lupus familiaris OX=9615 GN=COL1A2 PE=4 SV=1	C_familiaris	9	28	9	0.773	0.964501	1	1	1	1	1	1	1	1	1	1	1	1	1	1	1	1	1	1	1	1	1	1	1	1	1	1	1	1	1	1	1	1	1	1	1	1	1	1	1	1	1
High	F1PR54	Uncharacterized protein OS=Canis lupus familiaris OX=9615 GN=LTF PE=3 SV=1	C_familiaris	28	387	27	1.275	0.96883	1	1	1	1	1	1	1	1	1	1	1	1	1	1	1	1	1	1	1	1	1	1	1	1	1	1	1	1	1	1	1	1	1	1	1	1	1	1	1	1	1
High	F1PKX3	Coagulation factor XIII A chain OS=Canis lupus familiaris OX=9615 GN=F13A1 PE=4 SV=2	C_familiaris	27	780	26	1.264	0.96883	1	1	1	1	1	1	1	1	1	1	1	1	1	1	1	1	1	1	1	1	1	1	1	1	1	1	1	1	1	1	1	1	1	1	1	1	1	1	1	1	1
High	E2R9R1	Ras suppressor protein 1 OS=Canis lupus familiaris OX=9615 GN=RSU1 PE=4 SV=1	C_familiaris	13	275	13	0.767	0.96883	1	1	1	1	1	1	1	1	1	1	1	1	1	1	1	1	1	1	1	1	1	1	1	1	1	1	1	1	1	1	1	1	1	1	1	1	1	1	1	1	1
High	E2R9D2	Coagulation factor XII OS=Canis lupus familiaris OX=9615 GN=F12 PE=4 SV=3	C_familiaris	12	142	12	0.768	0.96883	1	1	1	1	1	1	1	1	1	1	1	1	1	1	1	1	1	1	1	1	1	1	1	1	1	1	1	1	1	1	1	1	1	1	1	1	1	1	1	1	1
High	E2RKR4	Proteasome subunit alpha type OS=Canis lupus familiaris OX=9615 GN=PSMA3 PE=3 SV=2	C_familiaris	8	265	8	0.763	0.96883	1	1	1	1	1	1	1	1	1	1	1	1	1	1	1	1	1	1	1	1	1	1	1	1	1	1	1	1	1	1	1	1	1	1	1	1	1	1	1	1	1
High	A0A5F4C7L7	Tetraspanin 9 OS=Canis lupus familiaris OX=9615 GN=TSPAN9 PE=4 SV=1	C_familiaris	2	33	2	0.804	0.96883	1	1	1	1	1	1	1	1	1	1	1	1	1	1	1	1	1	1	1	1	1	1	1	1	1	1	1	1	1	1	1	1	1	1	1	1	1	1	1	1	1
High	A0A5F4CZV7	Uncharacterized protein OS=Canis lupus familiaris OX=9615 PE=4 SV=1	C_familiaris	2	807	2	1.256	0.969805	1	1	1	1	1	1	1	1	1	1	1	1	1	1	1	1	1	1	1	1	1	1	1	1	1	1	1	1	1	1	1	1	1	1	1	1	1	1	1	1	1
High	Q28288	Syntaxin-binding protein 2 OS=Canis lupus familiaris OX=9615 GN=STXBP2 PE=2 SV=1	C_familiaris	22	134	22	0.78	0.969891	1	1	1	1	1	1	1	1	1	1	1	1	1	1	1	1	1	1	1	1	1	1	1	1	1	1	1	1	1	1	1	1	1	1	1	1	1	1	1	1	1
High	F1PAQ3	Maltase-glucoamylase OS=Canis lupus familiaris OX=9615 GN=MGAM PE=4 SV=3	C_familiaris	55	792	49	0.781	0.970195	1	1	1	1	1	1	1	1	1	1	1	1	1	1	1	1	1	1	1	1	1	1	1	1	1	1	1	1	1	1	1	1	1	1	1	1	1	1	1	1	1
High	E2RE76	Apolipoprotein A-IV OS=Canis lupus familiaris OX=9615 GN=APOA4 PE=3 SV=2	C_familiaris	30	1830	28	1.239	0.970978	1	1	1	1	1	1	1	1	1	1	1	1	1	1	1	1	1	1	1	1	1	1	1	1	1	1	1	1	1	1	1	1	1	1	1	1	1	1	1	1	1
High	F1PEU6	Hemicentin 2 OS=Canis lupus familiaris OX=9615 GN=HMCN2 PE=4 SV=3	C_familiaris	92	746	92	0.79	0.971475	1	1	1	1	1	1	1	1	1	1	1	1	1	1	1	1	1	1	1	1	1	1	1	1	1	1	1	1	1	1	1	1	1	1	1	1	1	1	1	1	1
High	E2RK21	Uncharacterized protein OS=Canis lupus familiaris OX=9615 GN=CFH PE=4 SV=3	C_familiaris	60	6481	60	1.222	0.972144	1	1	1	1	1	1	1	1	1	1	1	1	1	1	1	1	1	1	1	1	1	1	1	1	1	1	1	1	1	1	1	1	1	1	1	1	1	1	1	1	1
High	F1PKB2	Alpha-mannosidase OS=Canis lupus familiaris OX=9615 GN=MAN2B1 PE=3 SV=2	C_familiaris	19	103	19	1.223	0.972144	1	1	1	1	1	1	1	1	1	1	1	1	1	1	1	1	1	1	1	1	1	1	1	1	1	1	1	1	1	1	1	1	1	1	1	1	1	1	1	1	1
High	A0A5F4DDG2	Myristoylated alanine rich protein kinase C substrate OS=Canis lupus familiaris OX=9615 GN=MARCKS PE=4 SV=1	C_familiaris	13	914	13	1.223	0.972144	1	1	1	1	1	1	1	1	1	1	1	1	1	1	1	1	1	1	1	1	1	1	1	1	1	1	1	1	1	1	1	1	1	1	1	1	1	1	1	1	1
High	A0A5F4DDL4	Uncharacterized protein OS=Canis lupus familiaris OX=9615 PE=4 SV=1	C_familiaris	8	3644	2	1.228	0.972144	1	1	1	1	1	1	1	1	1	1	1	1	1	1	1	1	1	1	1	1	1	1	1	1	1	1	1	1	1	1	1	1	1	1	1	1	1	1	1	1	1
High	F1PYM4	Insulin like growth factor binding protein acid labile subunit OS=Canis lupus familiaris OX=9615 GN=IGFALS PE=4 SV=2	C_familiaris	10	55	10	0.801	0.974329	1	1	1	1	1	1	1	1	1	1	1	1	1	1	1	1	1	1	1	1	1	1	1	1	1	1	1	1	1	1	1	1	1	1	1	1	1	1	1	1	1
High	E2RQ71	Apolipoprotein M OS=Canis lupus familiaris OX=9615 GN=APOM PE=4 SV=2	C_familiaris	7	126	7	0.801	0.974406	1	1	1	1	1	1	1	1	1	1	1	1	1	1	1	1	1	1	1	1	1	1	1	1	1	1	1	1	1	1	1	1	1	1	1	1	1	1	1	1	1
High	A0A0B4J198	Adiponectin D OS=Canis lupus familiaris OX=9615 GN=EIF4A2 PE=4 SV=2	C_familiaris	8	1316	8	1.212	0.975161	1	1	1	1	1	1	1	1	1	1	1	1	1	1	1	1	1	1	1	1	1	1	1	1	1	1	1	1	1	1	1	1	1	1	1	1	1	1	1	1	1
High	E2QXN8	Annexin OS=Canis lupus familiaris OX=9615 GN=ANXA11 PE=3 SV=2	C_familiaris	20	172	20	1.201	0.978261	1	1	1	1	1	1	1	1	1	1	1	1	1	1	1	1	1	1	1	1	1	1	1	1	1	1	1	1	1	1	1	1	1	1	1	1	1	1	1	1	1
High	F1P7J4	Complement C5 OS=Canis lupus familiaris OX=9615 GN=C5 PE=4 SV=3	C_familiaris	55	2057	52	1.191	0.979433	1	1	1	1	1	1	1	1	1	1	1	1	1	1	1	1	1	1	1	1	1	1	1	1	1	1	1	1	1	1	1	1	1	1	1	1	1	1	1	1	1
High	J9P889	Collagen type VI alpha 1 chain OS=Canis lupus familiaris OX=9615 GN=COL6A1 PE=4 SV=2	C_familiaris	18	289	10	1.184	0.979433	1	1	1	1	1	1	1	1	1	1	1	1	1	1	1	1	1	1	1	1	1	1	1	1	1	1	1	1	1	1	1	1	1	1	1	1	1	1	1	1	1
High	E2QW34	Proteasome subunit beta OS=Canis lupus familiaris OX=9615 GN=PSMB2 PE=3 SV=1	C_familiaris	6	48	6	0.822	0.979433	1	1	1	1	1	1	1	1	1	1	1	1	1	1	1	1	1	1	1	1	1	1	1	1	1	1	1	1	1	1	1	1	1	1	1	1	1	1	1	1	1
High	E2QSZ5	Coronin OS=Canis lupus familiaris OX=9615 GN=CORO1A PE=3 SV=1	C_familiaris	14	237	14	1.179	0.980773	1	1	1	1	1	1	1	1	1	1	1	1	1	1	1	1	1	1	1	1	1	1	1	1	1	1	1	1	1	1	1	1	1	1	1	1	1	1	1	1	1
High	A0A5F4CG91	von Willebrand factor OS=Canis lupus familiaris OX=9615 GN=VWF PE=4 SV=1	C_familiaris	125	14361	125	0.844	0.986298	1	1	1	1	1	1	1	1	1	1	1	1	1	1	1	1	1	1	1	1	1	1	1	1	1	1	1	1	1	1	1	1	1	1	1	1	1	1	1	1	1
High	F1PGD4	Neural EGFL like 2 OS=Canis lupus familiaris OX=9615 GN=NELL2 PE=4 SV=3	C_familiaris	22	128	22	1.139	0.986298	1	1	1	1	1	1	1	1	1	1	1	1	1	1	1	1	1	1	1	1	1	1	1	1	1	1	1	1	1	1	1	1	1	1	1	1	1	1	1	1	1
High	A0A5F4BUZ8	Transketolase OS=Canis lupus familiaris OX=9615 GN=TKT PE=4 SV=1	C_familiaris	21	340	21	0.852	0.986298	1	1	1	1	1	1	1	1	1	1	1	1	1	1	1	1	1	1	1	1	1	1	1	1	1	1	1	1	1	1	1	1	1	1	1	1	1	1	1	1	1
High	A0A5F4D8D4	Aspartyl aminopeptidase OS=Canis lupus familiaris OX=9615 GN=DNPEP PE=4 SV=1	C_familiaris	12	128	12	0.849	0.986298	1	1	1	1	1	1	1	1	1	1	1	1	1	1	1	1	1	1	1	1	1	1	1	1	1	1	1	1	1	1	1	1	1	1	1	1	1	1	1	1	1
High	E2QWR0	Surfactant protein D OS=Canis lupus familiaris OX=9615 GN=SFTPD PE=4 SV=1	C_familiaris	10	392	10	0.84	0.986298	1	1	1	1	1	1	1	1	1	1	1	1	1	1	1	1	1	1	1	1	1	1	1	1	1	1	1	1	1	1	1	1	1	1	1	1	1	1	1	1	1
High	E2RMT7	GMP reductase OS=Canis lupus familiaris OX=9615 GN=GMPR PE=3 SV=1	C_familiaris	12	110	10	0.834	0.986298	1	1	1	1	1	1	1	1	1	1	1	1	1	1	1	1	1	1	1	1	1	1	1	1	1	1	1	1	1	1	1	1	1	1	1	1	1	1	1	1	1
High	A0A5F4CKL2	Uncharacterized protein OS=Canis lupus familiaris OX=9615 PE=4 SV=1	C_familiaris	6	1558	4	1.157	0.986298	1	1	1	1	1	1	1	1	1	1	1	1	1	1	1	1	1	1	1	1	1	1	1	1	1	1	1	1	1	1	1	1	1	1	1	1	1	1	1	1	1
High	F6Y6T8	Uncharacterized protein OS=Canis lupus familiaris OX=9615 GN=PIGR PE=4 SV=2	C_familiaris	29	2564	29	1.132	0.986818	1	1	1	1	1	1	1	1	1	1	1	1	1	1	1	1	1	1	1	1	1	1	1	1	1	1	1	1	1	1	1	1	1	1	1	1	1	1	1	1	1
High	F1PIC7	Heat shock protein family A (Hsp70) member 5 OS=Canis lupus familiaris OX=9615 GN=HSPA5 PE=3 SV=2	C_familiaris	26	622	21	1.131	0.986818	1	1	1	1	1	1	1	1	1	1	1	1	1	1	1	1	1	1	1	1	1	1	1	1	1	1	1	1	1	1	1	1	1	1	1	1	1	1	1	1	1
High	J9NUI6	Alpha-1-microglobulin/bikunin precursor OS=Canis lupus familiaris OX=9615 GN=AMBP PE=4 SV=1	C_familiaris	12	642	12	1.132	0.986818	1	1	1	1	1	1	1	1	1	1	1	1	1	1	1	1	1	1	1	1	1	1	1	1	1	1	1	1	1	1	1	1	1	1	1	1	1	1	1	1	1
High	A0A5F4BS96	Complement C1s OS=Canis lupus familiaris OX=9615 GN=C1S PE=4 SV=1	C_familiaris	29	1780	28	1.124	0.987033	1	1	1	1	1	1	1	1	1	1	1	1	1	1	1	1	1	1	1	1	1	1	1	1	1	1	1	1	1	1	1	1	1	1	1	1	1	1	1	1	1
High	A0A5F4DCJ3	WD repeat domain 1 OS=Canis lupus familiaris OX=9615 GN=WDR1 PE=4 SV=1	C_familiaris	21	213	21	1.13	0.987033	1	1	1	1	1	1	1	1	1	1	1	1	1	1	1	1	1	1	1	1	1	1	1	1	1	1	1	1	1	1	1	1	1	1	1	1	1	1	1	1	1
High	F1PPR8	Beta-glucuronidase OS=Canis lupus familiaris OX=9615 GN=GUSB PE=3 SV=2	C_familiaris	15	75	15	0.854	0.987033	1	1	1	1	1	1	1	1	1	1	1	1	1	1	1	1	1	1	1	1	1	1	1	1	1	1	1	1	1	1	1	1	1	1	1	1	1	1	1	1	1
High	J9P064	Collectin subfamily member 10 OS=Canis lupus familiaris OX=9615 GN=COLEC10 PE=4 SV=1	C_familiaris	9	258	9	1.121	0.987033	1	1	1	1	1	1	1	1	1	1	1	1	1	1	1	1	1	1	1	1	1	1	1	1	1	1	1	1	1	1	1	1	1	1	1	1	1	1	1	1	1
High	Q1HE58	Ras-related protein Rab-27A OS=Canis lupus familiaris OX=9615 GN=RAB27A PE=2 SV=1	C_familiaris	9	71	9	0.868	0.987033	1	1	1	1	1	1	1	1	1	1	1	1	1	1	1	1	1	1	1	1	1	1	1	1	1	1	1	1	1	1	1	1	1	1	1	1	1	1	1	1	1
High	F1PGY1	Heat shock protein 90 alpha family class A member 1 OS=Canis lupus familiaris OX=9615 GN=HSP90AA1 PE=4 SV=3	C_familiaris	18	347	11	1.12	0.987353	1	1	1	1	1	1	1	1	1	1	1	1	1	1	1	1	1	1	1	1	1	1	1	1	1	1	1	1	1	1	1	1	1	1	1	1	1	1	1	1	1
High	F1Q3I5	Collagen alpha-1(I) chain OS=Canis lupus familiaris OX=9615 GN=COL1A1 PE=4 SV=3	C_familiaris	11	191	11	0.871	0.988271	1	1	1	1	1	1	1	1	1	1	1	1	1	1	1	1	1	1	1	1	1	1	1	1	1	1	1	1	1	1	1	1	1	1	1	1	1	1	1	1	1
High	A0A5F4CIK5	Coagulation factor XIII B chain OS=Canis lupus familiaris OX=9615 GN=F13B PE=4 SV=1	C_familiaris	25	783	25	1.115	0.989534	1	1	1	1	1	1	1	1	1	1	1	1	1	1	1	1	1	1	1	1	1	1	1	1	1	1	1	1	1	1	1	1	1	1	1	1	1	1	1	1	1
High	E2RS79	Complement C2 OS=Canis lupus familiaris OX=9615 GN=C2 PE=3 SV=2	C_familiaris	17	141	17	0.878	0.99054	1	1	1	1	1	1	1	1	1	1	1	1	1	1	1	1	1	1	1	1	1	1	1	1	1	1	1	1	1	1	1	1	1	1	1	1	1	1	1	1	1
High	L7N0L3	Histone H4 OS=Canis lupus familiaris OX=9615 PE=3 SV=2	C_familiaris	4	40	4	0.856	0.99259	1	1	1	1	1	1	1	1	1	1	1	1	1	1	1	1	1	1	1	1	1	1	1	1	1	1	1	1	1	1	1	1	1	1	1	1	1	1	1	1	1
High	J9NST4	SelP_N domain-containing protein OS=Canis lupus familiaris OX=9615 GN=SELENOP PE=4 SV=2	C_familiaris	3	20	3	0.849	0.99259	1	1	1	1	1	1	1	1	1	1	1	1	1	1	1	1	1	1	1	1	1	1	1	1	1	1	1	1	1	1	1	1	1	1	1	1	1	1	1	1	1
High	A0A5F4D8U5	Actin beta like 2 OS=Canis lupus familiaris OX=9615 GN=ACTBL2 PE=4 SV=1	C_familiaris	11	1603	2	0.895	0.99482	1	1	1	1	1	1	1	1	1	1	1	1	1	1	1	1	1	1	1	1	1	1	1	1	1	1	1	1	1	1	1	1	1	1	1	1	1	1	1	1	1
High	F1PWW0	Filamin A OS=Canis lupus familiaris OX=9615 GN=FLNA PE=4 SV=3	C_familiaris	128	5193	116	1.063	0.995619	1	1	1	1	1	1	1	1	1	1	1	1	1	1	1	1	1	1	1	1	1	1	1	1	1	1	1	1	1	1	1	1	1	1	1	1	1	1	1	1	1
High	A0A5F4BYK6	Tenascin C OS=Canis lupus familiaris OX=9615 GN=TNC PE=4 SV=1	C_familiaris	53	898	53	1.065	0.995619	1	1	1	1	1	1	1	1	1	1	1	1	1	1	1	1	1	1	1	1	1	1	1	1	1	1	1	1	1	1	1	1	1	1	1	1	1	1	1	1	1
High	F1P707	Uncharacterized protein OS=Canis lupus familiaris OX=9615 GN=LOC484960 PE=4 SV=3	C_familiaris	50	872	50	0.932	0.995619	1	1	1	1	1	1	1	1	1	1	1	1	1	1	1	1	1	1	1	1	1	1	1	1	1	1	1	1	1	1	1	1	1	1	1	1	1	1	1	1	1
High	E2RFV9	Complement C9 OS=Canis lupus familiaris OX=9615 GN=C9 PE=4 SV=3	C_familiaris	22	545	22	1.036	0.995619	1	1	1	1	1	1	1	1	1	1	1	1	1	1	1	1	1	1	1	1	1	1	1	1	1	1	1	1	1	1	1	1	1	1	1	1	1	1	1	1	1
High	A0A5F4CZM1	Quiescin sulfhydryl oxidase 1 OS=Canis lupus familiaris OX=9615 GN=QSOX1 PE=4 SV=1	C_familiaris	22	397	22	0.953	0.995619	1	1	1	1	1	1	1	1	1	1	1	1	1	1	1	1	1	1	1	1	1	1	1	1	1	1	1	1	1	1	1	1	1	1	1	1	1	1	1	1	1
High	E2QZ50	Adenylyl cyclase-associated protein OS=Canis lupus familiaris OX=9615 GN=CAP1 PE=3 SV=1	C_familiaris	21	507	21	0.922	0.995619	1	1	1	1	1	1	1	1	1	1	1	1	1	1	1	1	1	1	1	1	1	1	1	1	1	1	1	1	1	1	1	1	1	1	1	1	1	1	1	1	1
High	P25473	Clusterin OS=Canis lupus familiaris OX=9615 GN=CLU PE=2 SV=1	C_familiaris	19	1595	19	0.9	0.995619	1	1	1	1	1	1	1	1	1	1	1	1	1	1	1	1	1	1	1	1	1	1	1	1	1	1	1	1	1	1	1	1	1	1	1	1	1	1	1	1	1
High	F1PNR5	Coagulation factor XI OS=Canis lupus familiaris OX=9615 GN=F11 PE=3 SV=3	C_familiaris	26	326	18	1.072	0.995619	1	1	1	1	1	1	1	1	1	1	1	1	1	1	1	1	1	1	1	1	1	1	1	1	1	1	1	1	1	1	1	1	1	1	1	1	1	1	1	1	1
High	F1PQ46	Anoctamin OS=Canis lupus familiaris OX=9615 GN=ANO6 PE=3 SV=3	C_familiaris	18	60	18	0.901	0.995619	1	1	1	1	1	1	1	1	1	1	1	1	1	1	1	1	1	1	1	1	1	1	1	1	1	1	1	1	1	1	1	1	1	1	1	1	1	1	1	1	1
High	J9P7F7	Ficolin 1 OS=Canis lupus familiaris OX=9615 GN=FCN1 PE=4 SV=1	C_familiaris	17	2075	17	1.032	0.995619	1	1	1	1	1	1	1	1	1	1	1	1	1	1	1	1	1	1	1	1	1	1	1	1	1	1	1	1	1	1	1	1	1	1	1	1	1	1	1	1	1
High	E2R1N7	Prenylcysteine oxidase 1 OS=Canis lupus familiaris OX=9615 GN=PCYOX1 PE=3 SV=1	C_familiaris	15	138	15	0.926	0.995619	1	1	1	1	1	1	1	1	1	1	1	1	1	1	1	1	1	1	1	1	1	1	1	1	1	1	1	1	1	1	1	1	1	1	1	1	1	1	1	1	1
High	F1PQS3	F-actin-capping protein subunit beta OS=Canis lupus familiaris OX=9615 GN=CAPZB PE=3 SV=2	C_familiaris	14	162	14	1.073	0.995619	1	1	1	1	1	1	1	1	1	1	1	1	1	1	1	1	1	1	1	1	1	1	1	1	1	1	1	1	1	1	1	1	1	1	1	1	1	1	1	1	1
High	F1P6A2	Matrix metalloproteinase-9 OS=Canis lupus familiaris OX=9615 GN=MMP9 PE=3 SV=3	C_familiaris	14	53	14	0.892	0.995619	1	1	1	1	1	1	1	1	1	1	1	1	1	1	1	1	1	1	1	1	1	1	1	1	1	1	1	1	1	1	1	1	1	1	1	1	1	1	1	1	1
High	E2R2F7	Sex hormone binding globulin OS=Canis lupus familiaris OX=9615 GN=SHBG PE=4 SV=1	C_familiaris	13	439	13	1.058	0.995619	1	1	1	1	1	1	1	1	1	1	1	1	1	1	1	1	1	1	1	1	1	1	1	1	1	1	1	1	1	1	1	1	1	1	1	1	1	1	1	1	1
High	A0A5F4BQ47	Phospholipid transfer protein OS=Canis lupus familiaris OX=9615 GN=PLTP PE=4 SV=1	C_familiaris	8	124	8	1.037	0.995619	1	1	1	1	1	1	1	1	1	1	1	1	1	1	1	1	1	1	1	1	1	1	1	1	1	1	1	1	1	1	1	1	1	1	1	1	1	1	1	1	1
High	F1PPL9	C1q domain-containing protein OS=Canis lupus familiaris OX=9615 GN=C1QTNF3 PE=4 SV=3	C_familiaris	8	156	8	0.942	0.995619	1	1	1	1	1	1	1	1	1	1	1	1	1	1	1	1	1	1	1	1	1	1	1	1	1	1	1	1	1	1	1	1	1	1	1	1	1	1	1	1	1
High	E2RLS3	Heat shock protein 90 alpha family class B member 1 OS=Canis lupus familiaris OX=9615 GN=HSP90AB1 PE=3 SV=2	C_familiaris	14	335	7	1.073	0.995619	1	1	1	1	1	1	1	1	1	1	1	1	1	1	1	1	1	1	1	1	1	1	1	1	1	1	1	1	1	1	1	1	1	1	1	1	1	1	1	1	1
High	F1PL63	Fructose-bisphosphate aldolase OS=Canis lupus familiaris OX=9615 GN=ALDOC PE=3 SV=1	C_familiaris	9	337	7	0.9	0.995619	1	1	1	1	1	1	1	1	1	1	1	1	1	1	1	1	1	1	1	1	1	1	1	1	1	1	1	1	1	1	1	1	1	1	1	1	1	1	1	1	1
High	E2RPE3	IST1 factor associated with ESCRT-III OS=Canis lupus familiaris OX=9615 GN=IST1 PE=4 SV=1	C_familiaris	5	17	5	1.053	0.995619	1	1	1	1	1	1	1	1	1	1	1	1	1	1	1	1	1	1	1	1	1	1	1	1	1	1	1	1	1	1	1	1	1	1	1	1	1	1	1	1	1
High	A0A5F4D1B8	Uncharacterized protein OS=Canis lupus familiaris OX=9615 PE=4 SV=1	C_familiaris	9	3487	2	1.014	0.995619	1	1	1	1	1	1	1	1	1	1	1	1	1	1	1	1	1	1	1	1	1	1	1	1	1	1	1	1	1	1	1	1	1	1	1	1	1	1	1	1	1
High	J9NYY8	Ig-like domain-containing protein OS=Canis lupus familiaris OX=9615 PE=4 SV=2	C_familiaris	9	3614	2	0.91	0.995619	1	1	1	1	1	1	1	1	1	1	1	1	1	1	1	1	1	1	1	1	1	1	1	1	1	1	1	1	1	1	1	1	1	1	1	1	1	1	1	1	1
High	Q6QNF4	Hepatocyte growth factor activator OS=Canis lupus familiaris OX=9615 GN=HGFAC PE=2 SV=1	C_familiaris	16	394	16	0.957	0.99563	1	1	1	1	1	1	1	1	1	1	1	1	1	1	1	1	1	1	1	1	1	1	1	1	1	1	1	1	1	1	1	1	1	1	1	1	1	1	1	1	1
High	Q28256	Platelet glycoprotein Ib alpha chain OS=Canis lupus familiaris OX=9615 GN=GP1BA PE=2 SV=2	C_familiaris	13	268	13	0.96	0.996995	1	1	1	1	1	1	1	1	1	1	1	1	1	1	1	1	1	1	1	1	1	1	1	1	1	1	1	1	1	1	1	1	1	1	1	1	1	1	1	1	1
High	J9P346	SCY domain-containing protein OS=Canis lupus familiaris OX=9615 GN=PPBP PE=3 SV=1	C_familiaris	5	101	5	1.013	0.99713	1	1	1	1	1	1	1	1	1	1	1	1	1	1	1	1	1	1	1	1	1	1	1	1	1	1	1	1	1	1	1	1	1	1	1	1	1	1	1	1	1
High	E2RSE5	Dihydropyrimidinase OS=Canis lupus familiaris OX=9615 GN=DPYS PE=4 SV=3	C_familiaris	17	114	16	1.004	0.997778	1	1	1	1	1	1	1	1	1	1	1	1	1	1	1	1	1	1	1	1	1	1	1	1	1	1	1	1	1	1	1	1	1	1	1	1	1	1	1	1	1
High	A0A5F4CP88	Protein tyrosine phosphatase receptor type C OS=Canis lupus familiaris OX=9615 GN=PTPRC PE=4 SV=1	C_familiaris	15	66	15	0.995	0.997778	1	1	1	1	1	1	1	1	1	1	1	1	1	1	1	1	1	1	1	1	1	1	1	1	1	1	1	1	1	1	1	1	1	1	1	1	1	1	1	1	1
High	P05124	Creatine kinase B-type OS=Canis lupus familiaris OX=9615 GN=CKB PE=1 SV=1	C_familiaris	15	165	14	1.004	0.997778	1	1	1	1	1	1	1	1	1	1	1	1	1	1	1	1	1	1	1	1	1	1	1	1	1	1	1	1	1	1	1	1	1	1	1	1	1	1	1	1	1
High	E2R4H4	Proteasome endopeptidase complex OS=Canis lupus familiaris OX=9615 GN=PSMA5 PE=3 SV=3	C_familiaris	9	132	9	0.977	0.997778	1	1	1	1	1	1	1	1	1	1	1	1	1	1	1	1	1	1	1	1	1	1	1	1	1	1	1	1	1	1	1	1	1	1	1	1	1	1	1	1	1
High	J9P8M2	Fibronectin OS=Canis lupus familiaris OX=9615 GN=FN1 PE=4 SV=2	C_familiaris	116	25403	5	0.976	0.997778	1	1	1	1	1	1	1	1	1	1	1	1	1	1	1	1	1	1	1	1	1	1	1	1	1	1	1	1	1	1	1	1	1	1	1	1	1	1	1	1	1
High	A0A5F4CSP7	Uncharacterized protein OS=Canis lupus familiaris OX=9615 PE=4 SV=1	C_familiaris	3	966	2	1.006	0.997778	1	1	1	1	1	1	1	1	1	1	1	1	1	1	1	1	1	1	1	1	1	1	1	1	1	1	1	1	1	1	1	1	1	1	1	1	1	1	1	1	1
High	A0A5F4D9M4	Uncharacterized protein OS=Canis lupus familiaris OX=9615 GN=ARF3 PE=4 SV=1	C_familiaris	7	86	5	0.194	0.580016	1	1	1	1	1	Not Found	1	1	1	1	1	1	1	1	1	1	1	1	1	1	1	1	1	1	1	1	1	1	1	1	1	1	1	1	1	1	1	1	1	1	1
High	F1PBN7	ADAMTS like 2 OS=Canis lupus familiaris OX=9615 GN=ADAMTSL2 PE=4 SV=2	C_familiaris	9	91	9	2.348	0.933819	1	1	1	1	1	1	1	1	1	1	1	1	1	1	1	1	1	1	1	1	1	1	Not Found	1	1	1	1	1	1	1	1	1	1	1	1	1	1	1	1	1	1
High	F1PKY3	Adenosine deaminase OS=Canis lupus familiaris OX=9615 GN=ADA PE=3 SV=3	C_familiaris	9	61	9	1.923	0.933819	1	1	1	1	Not Found	1	1	1	1	1	1	1	1	1	1	1	1	1	1	1	1	1	1	1	1	1	1	1	1	1	1	1	1	1	1	1	1	1	1	1	1
High	E2R7L1	Protein disulfide-isomerase A4 OS=Canis lupus familiaris OX=9615 GN=PDIA4 PE=3 SV=2	C_familiaris	7	34	7	1.906	0.933819	1	1	1	1	1	1	Not Found	1	1	1	1	1	1	1	1	1	1	1	1	1	1	1	1	1	1	1	1	1	1	1	1	1	1	1	1	1	1	1	1	1	1
High	F1Q057	Peroxidasin OS=Canis lupus familiaris OX=9615 GN=PXDN PE=4 SV=3	C_familiaris	14	64	14	1.306	0.956644	1	1	1	1	1	1	1	1	1	1	1	1	1	1	1	1	1	1	1	1	1	1	1	1	1	1	1	1	1	1	1	1	1	1	1	1	1	1	Not Found	1	1
High	A0A5F4C819	Leukotriene A4 hydrolase OS=Canis lupus familiaris OX=9615 GN=LTA4H PE=4 SV=1	C_familiaris	19	159	19	1.183	0.979433	1	1	1	1	1	Not Found	1	1	1	1	1	1	1	1	1	1	1	1	1	1	1	1	1	1	1	1	1	1	1	1	1	1	1	1	1	1	1	1	1	1	1
High	O97555	Rab GDP dissociation inhibitor alpha OS=Canis lupus familiaris OX=9615 GN=GDI1 PE=2 SV=1	C_familiaris	19	217	11	0.857	0.986298	1	1	1	1	1	Not Found	1	1	1	1	1	1	1	1	1	1	1	1	1	1	1	1	1	1	1	1	1	1	1	1	1	1	1	1	1	1	1	1	1	1	1
High	F1PCM9	SH3 domain containing GRB2 like, endophilin B1 OS=Canis lupus familiaris OX=9615 GN=SH3GLB1 PE=4 SV=3	C_familiaris	9	44	9	0.829	0.986298	1	Not Found	1	1	1	1	1	1	1	1	1	1	1	1	1	1	1	1	1	1	1	1	1	1	1	1	1	1	1	1	1	1	1	1	1	1	1	1	1	1	1
High	E2R985	Actin-related protein 2/3 complex subunit 3 OS=Canis lupus familiaris OX=9615 GN=ARPC3 PE=3 SV=3	C_familiaris	4	27	4	1.167	0.986818	1	1	1	1	Not Found	1	1	1	1	1	1	1	1	1	1	1	1	1	1	1	1	1	1	1	1	1	1	1	1	1	1	1	1	1	1	1	1	1	1	1	1
High	J9NZX7	Malic enzyme OS=Canis lupus familiaris OX=9615 GN=ME1 PE=3 SV=2	C_familiaris	18	70	18	0.881	0.995619	1	1	1	1	1	1	1	1	1	1	1	1	1	1	1	1	1	1	1	1	1	1	1	1	1	1	1	1	1	1	1	1	1	1	1	1	1	1	1	Not Found	1
High	E2RDX2	Charged multivesicular body protein 4B OS=Canis lupus familiaris OX=9615 GN=CHMP4B PE=4 SV=1	C_familiaris	6	125	6	0.146	0.360435	1	1	1	1	Not Found	1	Not Found	1	1	1	1	1	1	1	1	1	1	1	1	1	1	1	1	1	1	1	1	1	1	1	1	1	1	1	1	1	1	1	1	1	1
High	E2R5J0	Pentaxin OS=Canis lupus familiaris OX=9615 GN=CRP PE=3 SV=2	C_familiaris	5	55	5	3.075	0.841834	1	1	1	1	1	Not Found	Not Found	1	1	1	1	1	1	1	1	1	1	1	1	1	1	1	1	1	1	1	1	1	1	1	1	1	1	1	1	1	1	1	1	1	1
High	J9P2K0	Fibulin 2 OS=Canis lupus familiaris OX=9615 GN=FBLN2 PE=4 SV=1	C_familiaris	12	63	12	3.013	0.852753	1	1	1	1	1	1	1	1	1	1	Not Found	Not Found	1	1	1	1	1	1	1	1	1	1	1	1	1	1	1	1	1	1	1	1	1	1	1	1	1	1	1	1	1
High	Q8HZM5	Glutamine synthetase OS=Canis lupus familiaris OX=9615 GN=GLUL PE=1 SV=3	C_familiaris	6	45	6	0.464	0.933819	1	1	1	1	Not Found	Not Found	1	1	1	1	1	1	1	1	1	1	1	1	1	1	1	1	1	1	1	1	1	1	1	1	1	1	1	1	1	1	1	1	1	1	1
High	A0A5F4BU46	Uncharacterized protein OS=Canis lupus familiaris OX=9615 PE=4 SV=1	C_familiaris	6	43	3	0.576	0.938246	1	1	1	1	1	1	1	1	1	1	1	1	1	1	1	1	1	1	Not Found	Not Found	Not Found	1	1	1	1	1	1	1	1	1	1	1	1	1	1	1	1	1	1	1	1
High	A0A5F4CT62	Uncharacterized protein OS=Canis lupus familiaris OX=9615 GN=YWHAQ PE=4 SV=1	C_familiaris	9	164	5	0.764	0.95714	1	1	1	1	Not Found	1	Not Found	1	1	1	1	1	1	1	1	1	1	1	1	1	1	1	1	1	1	1	1	1	1	1	1	1	1	1	1	1	1	1	Not Found	Not Found	1
High	J9NRH5	Tyrosine 3-monooxygenase/tryptophan 5-monooxygenase activation protein gamma OS=Canis lupus familiaris OX=9615 GN=YWHAG PE=3 SV=2	C_familiaris	7	142	3	0.467	0.933819	1	1	1	Not Found	1	1	1	1	1	1	1	1	1	1	1	1	1	1	1	1	1	1	1	1	1	1	1	1	1	Not Found	1	1	Not Found	1	1	Not Found	Not Found	Not Found	1	1	1
High	E2QYZ2	5'-nucleotidase OS=Canis lupus familiaris OX=9615 GN=NT5C3A PE=3 SV=1	C_familiaris	4	9	4	1.317	0.96883	1	Not Found	Not Found	Not Found	1	1	1	1	1	Not Found	1	1	1	1	1	1	1	1	1	1	1	1	1	1	1	1	1	1	1	1	1	1	1	1	1	1	1	1	Not Found	Not Found	1
High	J9NXJ4	Hexose-6-phosphate dehydrogenase/glucose 1-dehydrogenase OS=Canis lupus familiaris OX=9615 GN=H6PD PE=4 SV=2	C_familiaris	12	30	12	0.964	0.995619	1	Not Found	1	1	1	Not Found	1	Not Found	Not Found	Not Found	Not Found	1	1	1	1	1	1	1	1	1	1	1	1	1	1	1	1	1	Not Found	Not Found	1	1	1	1	1	1	1	1	1	1	1
High	E2RKS4	Eukaryotic translation initiation factor 4B OS=Canis lupus familiaris OX=9615 GN=EIF4B PE=4 SV=2	C_familiaris	4	31	4	0.459	0.933819	1	1	Not Found	1	Not Found	Not Found	Not Found	1	1	1	1	1	1	1	1	1	1	1	1	1	1	1	1	1	1	Not Found	Not Found	Not Found	1	1	1	Not Found	Not Found	Not Found	Not Found	1	1	1	Not Found	Not Found	1
High	E2RI17	Sorcin OS=Canis lupus familiaris OX=9615 GN=SRI PE=4 SV=3	C_familiaris	4	13	4	0.78	0.963354	1	1	1	1	Not Found	Not Found	1	1	1	1	1	1	1	1	1	1	1	1	Not Found	Not Found	Not Found	1	1	1	1	Not Found	Not Found	Not Found	1	Not Found	1	1	Not Found	1	Not Found	Not Found	1	Not Found	1	Not Found	1
High	A0A5F4CKV5	Solute carrier family 12 member 7 OS=Canis lupus familiaris OX=9615 GN=SLC12A7 PE=4 SV=1	C_familiaris	2	4	2	1.005	0.995619	1	1	1	1	1	1	1	1	1	1	1	1	Not Found	Not Found	Not Found	1	1	Not Found	Not Found	1	Not Found	1	Not Found	Not Found	1	1	1	1	1	1	1	1	Not Found	Not Found	Not Found	Not Found	Not Found	1	Not Found	Not Found	Not Found
High	A0A5F4DHM9	Inositol polyphosphate-5-phosphatase D OS=Canis lupus familiaris OX=9615 GN=INPP5D PE=4 SV=1	C_familiaris	2	6	2	11.294	0.124341	1	Not Found	1	Not Found	1	Not Found	1	1	1	Not Found	Not Found	1	Not Found	1	1	1	Not Found	Not Found	Not Found	Not Found	Not Found	Not Found	Not Found	Not Found	Not Found	Not Found	1	1	1	1	1	Not Found	1	1	Not Found	1	1	1	Not Found	Not Found	1
High	A0A5F4BY69	Collagen type XII alpha 1 chain OS=Canis lupus familiaris OX=9615 GN=COL12A1 PE=4 SV=1	C_familiaris	4	6	4	2.022	0.933819	Not Found	Not Found	Not Found	1	1	1	1	1	Not Found	Not Found	Not Found	Not Found	1	1	1	Not Found	Not Found	Not Found	1	1	1	1	Not Found	Not Found	Not Found	Not Found	Not Found	1	1	1	1	1	Not Found	Not Found	Not Found	1	1	1	Not Found	Not Found	Not Found
High	A0A5F4DHX6	Uncharacterized protein OS=Canis lupus familiaris OX=9615 GN=NPM1 PE=4 SV=1	C_familiaris	2	4	2	0.337	0.831917	Not Found	1	Not Found	Not Found	Not Found	Not Found	Not Found	1	1	1	1	1	Not Found	Not Found	Not Found	Not Found	Not Found	Not Found	Not Found	Not Found	Not Found	Not Found	Not Found	Not Found	Not Found	Not Found	Not Found	Not Found	Not Found	Not Found	1	1	1	1	1	Not Found	Not Found	Not Found	Not Found	Not Found	Not Found
High	A0A5F4CXH2	Bactericidal permeability increasing protein OS=Canis lupus familiaris OX=9615 GN=BPI PE=4 SV=1	C_familiaris	2	2	2	1.143	0.986298	Not Found	1	1	1	Not Found	Not Found	Not Found	Not Found	Not Found	Not Found	Not Found	1	Not Found	Not Found	Not Found	Not Found	Not Found	Not Found	Not Found	Not Found	Not Found	Not Found	Not Found	Not Found	Not Found	Not Found	Not Found	Not Found	Not Found	Not Found	Not Found	Not Found	Not Found	Not Found	Not Found	Not Found	Not Found	Not Found	Not Found	Not Found	Not Found
High	F1PXF9	Hemicentin 1 OS=Canis lupus familiaris OX=9615 GN=HMCN1 PE=4 SV=2	C_familiaris	19	130	19	2.947	0.854371	1	1	1	1	1	1	1	1	1	1	1	1	1	1	1	1	1	1	1	1	1	Not Found	1	1	1	1	1	1	1	1	1	1	1	1	1	1	1	1	1	1	1
High	P01785	Ig heavy chain V region MOO OS=Canis lupus familiaris OX=9615 PE=1 SV=1	C_familiaris	2	103	2	2.689	0.884543	1	1	1	1	1	1	Not Found	1	1	1	1	1	1	1	1	1	1	1	1	1	1	1	1	1	1	1	1	1	1	1	1	1	1	1	1	1	1	1	1	1	1
High	E2QSF4	Tubulin beta chain OS=Canis lupus familiaris OX=9615 GN=TUBB PE=3 SV=1	C_familiaris	22	574	4	2.43	0.912827	1	1	1	1	Not Found	1	1	1	1	1	1	1	1	1	1	1	1	1	1	1	1	1	1	1	1	1	1	1	1	1	1	1	1	1	1	1	1	1	1	1	1
High	J9P416	Tenascin N OS=Canis lupus familiaris OX=9615 GN=TNN PE=4 SV=1	C_familiaris	28	123	28	1.938	0.933819	1	1	1	1	1	1	1	1	1	1	1	1	Not Found	1	1	1	1	1	1	1	1	1	1	1	1	1	1	1	1	1	1	1	1	1	1	1	1	1	1	1	1
High	F1PPH7	Proteasome 26S subunit, ATPase 2 OS=Canis lupus familiaris OX=9615 GN=PSMC2 PE=3 SV=2	C_familiaris	15	102	15	0.432	0.933819	1	1	1	1	Not Found	1	1	1	1	1	1	1	1	1	1	1	1	1	1	1	1	1	1	1	1	1	1	1	1	1	1	1	1	1	1	1	1	1	1	1	1
High	F6X4P9	Solute carrier family 38 member 10 OS=Canis lupus familiaris OX=9615 GN=SLC38A10 PE=4 SV=2	C_familiaris	13	38	13	2.276	0.933819	1	1	1	1	1	1	1	1	1	1	1	1	1	1	1	1	1	1	1	1	1	1	1	1	1	1	1	1	1	1	1	1	1	1	1	1	1	1	1	1	Not Found
High	A0A5F4BWC4	Uncharacterized protein OS=Canis lupus familiaris OX=9615 PE=4 SV=1	C_familiaris	10	3454	2	1.866	0.933819	1	1	1	1	1	1	1	1	1	1	1	1	1	1	1	1	1	1	1	1	1	1	1	1	1	Not Found	1	1	1	1	1	1	1	1	1	1	1	1	1	1	1
High	A0A5F4DGY6	FAT atypical cadherin 1 OS=Canis lupus familiaris OX=9615 GN=FAT1 PE=4 SV=1	C_familiaris	26	61	26	1.712	0.938246	1	1	1	1	1	1	1	1	1	1	1	1	1	1	1	1	1	1	1	1	1	1	1	1	1	1	1	1	1	1	1	1	1	1	1	Not Found	1	1	1	1	1
High	E2QUY9	ADAM metallopeptidase with thrombospondin type 1 motif 13 OS=Canis lupus familiaris OX=9615 GN=ADAMTS13 PE=4 SV=2	C_familiaris	18	98	18	1.641	0.938823	1	1	Not Found	1	1	1	1	1	1	1	1	1	1	1	1	1	1	1	1	1	1	1	1	1	1	1	1	1	1	1	1	1	1	1	1	1	1	1	1	1	1
High	Q53VB8	Ferritin light chain OS=Canis lupus familiaris OX=9615 GN=FTL PE=2 SV=3	C_familiaris	7	47	7	0.727	0.953219	1	1	1	1	1	1	1	1	1	1	1	Not Found	1	1	1	1	1	1	1	1	1	1	1	1	1	1	1	1	1	1	1	1	1	1	1	1	1	1	1	1	1
High	G1K265	Lysozyme OS=Canis lupus familiaris OX=9615 GN=LYZ PE=2 SV=1	C_familiaris	5	71	5	0.763	0.972144	1	1	1	1	Not Found	1	1	1	1	1	1	1	1	1	1	1	1	1	1	1	1	1	1	1	1	1	1	1	1	1	1	1	1	1	1	1	1	1	1	1	1
High	F1P9U4	Dihydropyrimidinase like 2 OS=Canis lupus familiaris OX=9615 GN=DPYSL2 PE=4 SV=2	C_familiaris	20	204	16	0.955	0.995619	1	1	1	1	1	1	1	1	1	1	1	1	1	1	1	1	1	1	1	1	1	1	1	1	1	1	1	1	1	1	1	1	1	1	1	1	1	1	1	1	1
High	F1PR80	Serine peptidase inhibitor, Kazal type 5 OS=Canis lupus familiaris OX=9615 GN=SPINK5 PE=4 SV=3	C_familiaris	4	9	4	0.54	0.935358	1	1	1	1	1	1	1	1	1	Not Found	1	Not Found	1	1	1	1	1	1	1	1	1	1	1	1	1	1	1	1	1	1	1	1	1	1	1	1	1	1	1	1	1
High	A0A5F4CKF4	Tetraspanin 2 OS=Canis lupus familiaris OX=9615 GN=TSPAN2 PE=4 SV=1	C_familiaris	2	70	2	0.552	0.938246	1	1	1	1	1	1	1	1	1	1	1	1	1	1	1	1	1	1	1	1	1	1	1	1	1	1	1	1	1	1	1	1	1	1	1	1	1	1	1	1	1
High	F1Q455	PKHD1 like 1 OS=Canis lupus familiaris OX=9615 GN=PKHD1L1 PE=4 SV=3	C_familiaris	25	71	25	0.629	0.952597	1	1	1	1	1	1	1	1	1	1	1	1	1	1	1	1	1	1	1	1	1	1	1	1	1	1	1	1	1	1	1	1	1	1	1	Not Found	Not Found	1	1	1	1
High	A0A5F4D182	Serine hydroxymethyltransferase 1 OS=Canis lupus familiaris OX=9615 GN=SHMT1 PE=4 SV=1	C_familiaris	12	60	12	0.778	0.969875	1	1	1	1	Not Found	Not Found	1	1	1	1	1	1	1	1	1	1	1	1	1	1	1	1	1	1	1	1	1	1	1	1	1	1	1	1	1	1	1	1	1	1	1
High	Q6TN20	Cathelicidin OS=Canis lupus familiaris OX=9615 GN=CAMP PE=2 SV=1	C_familiaris	4	39	4	2.604	0.899167	1	1	1	1	1	1	1	1	1	Not Found	1	1	1	1	1	1	1	1	1	1	1	1	1	1	1	1	1	1	1	1	1	1	1	1	1	1	1	1	1	1	Not Found
High	A0A5F4CWQ9	Uncharacterized protein OS=Canis lupus familiaris OX=9615 PE=4 SV=1	C_familiaris	2	54	2	2.421	0.913508	1	1	1	1	1	1	1	1	1	1	1	Not Found	1	1	1	1	1	1	1	1	1	1	1	1	1	1	1	1	1	1	1	1	1	1	1	1	1	1	1	1	1
High	E2R7N5	Coronin OS=Canis lupus familiaris OX=9615 GN=CORO1B PE=3 SV=1	C_familiaris	11	69	11	2.208	0.933819	1	1	1	1	Not Found	Not Found	Not Found	1	1	1	1	1	1	1	1	1	1	1	1	1	1	1	1	1	1	1	1	1	1	1	1	1	1	1	1	1	1	1	1	1	1
High	F1PEM7	Insulin like growth factor binding protein 2 OS=Canis lupus familiaris OX=9615 GN=IGFBP2 PE=4 SV=2	C_familiaris	4	45	4	1.711	0.940442	1	1	1	1	1	1	1	Not Found	1	Not Found	1	1	Not Found	1	1	1	1	1	1	1	1	1	1	1	1	1	1	1	1	1	1	1	1	1	1	1	1	1	1	1	1
High	E2RII4	EMAP like 2 OS=Canis lupus familiaris OX=9615 GN=EML2 PE=4 SV=3	C_familiaris	5	12	5	1.603	0.944788	1	1	1	1	1	1	1	1	1	1	1	1	1	1	1	1	1	1	1	1	1	1	1	1	1	1	1	1	1	1	1	1	1	1	1	1	1	1	Not Found	Not Found	1
High	A0A5F4BQS4	Drebrin like OS=Canis lupus familiaris OX=9615 GN=DBNL PE=4 SV=1	C_familiaris	4	81	2	1.923	0.933819	1	1	Not Found	1	Not Found	1	Not Found	1	1	1	1	1	1	1	1	1	1	1	1	1	1	1	1	1	1	1	1	1	1	1	1	1	1	1	1	1	1	1	1	1	1
High	E2QYG1	Periostin OS=Canis lupus familiaris OX=9615 GN=POSTN PE=4 SV=3	C_familiaris	6	21	6	0.847	0.986298	1	1	1	1	1	1	1	1	1	1	1	1	1	1	1	1	1	1	1	1	1	1	1	1	1	1	1	1	1	1	1	1	1	1	1	Not Found	Not Found	Not Found	1	1	1
High	E2RM35	Pyrroline-5-carboxylate reductase OS=Canis lupus familiaris OX=9615 GN=PYCR3 PE=3 SV=2	C_familiaris	3	14	3	0.9	0.995619	1	1	1	1	1	1	1	1	1	1	1	1	1	1	1	1	1	1	Not Found	Not Found	Not Found	1	1	1	1	1	1	1	1	1	1	1	1	1	1	1	1	1	1	1	Not Found
High	F1PIT4	Tetraspanin OS=Canis lupus familiaris OX=9615 GN=CD63 PE=3 SV=2	C_familiaris	3	19	3	1.119	0.986298	Not Found	Not Found	1	1	1	1	1	1	1	Not Found	1	1	Not Found	Not Found	Not Found	1	1	1	1	1	1	1	Not Found	Not Found	1	1	1	1	1	1	1	1	1	1	1	1	1	1	1	1	1
High	A0A5F4CVK3	Uncharacterized protein OS=Canis lupus familiaris OX=9615 PE=4 SV=1	C_familiaris	5	26	5	3.208	0.847605	Not Found	1	1	1	1	1	Not Found	1	1	1	1	1	1	Not Found	1	1	1	1	1	1	1	1	1	1	Not Found	Not Found	Not Found	1	Not Found	Not Found	1	1	1	1	1	1	Not Found	Not Found	1	1	1
High	E2R691	Peptidyl arginine deiminase 3 OS=Canis lupus familiaris OX=9615 GN=PADI3 PE=4 SV=2	C_familiaris	4	7	4	0.921	0.99482	1	1	1	1	1	Not Found	Not Found	1	1	1	1	1	1	1	1	1	1	1	1	1	1	1	1	1	Not Found	Not Found	Not Found	1	Not Found	Not Found	1	1	Not Found	Not Found	Not Found	Not Found	Not Found	1	Not Found	Not Found	1
High	F1P703	Niban apoptosis regulator 1 OS=Canis lupus familiaris OX=9615 GN=NIBAN1 PE=4 SV=3	C_familiaris	4	6	4	1.068	0.995619	Not Found	Not Found	1	1	1	1	1	Not Found	1	1	1	1	Not Found	Not Found	Not Found	1	1	1	Not Found	Not Found	Not Found	Not Found	1	Not Found	Not Found	1	1	Not Found	1	1	Not Found	Not Found	1	1	1	1	Not Found	Not Found	Not Found	1	1
High	E2RRR2	Hydroxysteroid 17-beta dehydrogenase 14 OS=Canis lupus familiaris OX=9615 GN=HSD17B14 PE=4 SV=1	C_familiaris	5	18	5	1.401	0.938246	Not Found	1	Not Found	Not Found	Not Found	1	Not Found	1	Not Found	Not Found	Not Found	1	1	1	1	Not Found	Not Found	Not Found	Not Found	Not Found	Not Found	Not Found	Not Found	Not Found	1	1	1	1	1	1	Not Found	1	1	1	1	1	1	1	1	Not Found	1
High	E2RGB0	Apolipoprotein C4 OS=Canis lupus familiaris OX=9615 GN=APOC4 PE=4 SV=3	C_familiaris	2	66	2	2.86	0.871393	1	1	1	1	1	1	1	1	1	1	1	1	1	1	1	1	1	1	1	1	Not Found	1	1	1	1	1	1	1	1	1	1	1	1	1	1	1	1	1	1	1	1
High	F1PQ52	Myeloperoxidase OS=Canis lupus familiaris OX=9615 GN=MPO PE=4 SV=3	C_familiaris	16	44	16	2.415	0.91948	1	1	1	1	1	1	1	1	1	1	1	1	1	1	1	1	1	1	1	1	1	1	1	1	1	1	1	1	1	1	1	1	1	1	1	1	1	1	Not Found	1	1
High	E2QYM7	Thrombospondin 3 OS=Canis lupus familiaris OX=9615 GN=THBS3 PE=4 SV=1	C_familiaris	16	189	14	1.984	0.933819	1	1	1	1	1	1	1	1	1	1	1	1	1	1	1	1	1	1	1	Not Found	Not Found	1	1	1	1	1	1	1	1	1	1	1	1	1	1	1	1	1	1	1	1
High	A0A5F4D5V1	Fibulin 1 OS=Canis lupus familiaris OX=9615 GN=FBLN1 PE=4 SV=1	C_familiaris	19	665	4	1.875	0.933819	1	1	1	1	1	1	1	1	1	1	1	1	1	1	1	1	1	1	1	1	1	1	1	1	1	1	1	1	1	1	1	1	1	1	1	1	1	1	1	1	1
High	F1Q432	Tenascin XB OS=Canis lupus familiaris OX=9615 GN=TNXB PE=4 SV=3	C_familiaris	22	114	22	1.596	0.944788	1	1	1	1	1	1	1	1	1	1	1	1	1	1	1	1	1	1	1	1	1	1	1	1	1	1	1	1	1	1	1	1	1	1	1	1	1	1	1	1	1
High	F1PQ99	Mannan binding lectin serine peptidase 1 OS=Canis lupus familiaris OX=9615 GN=MASP1 PE=3 SV=2	C_familiaris	20	943	4	1.213	0.970978	1	1	1	1	1	1	1	1	Not Found	1	1	1	1	1	1	1	1	1	1	1	1	1	1	1	1	1	1	1	1	1	1	1	1	1	1	1	1	1	1	1	Not Found
High	E2QXA6	Calpastatin OS=Canis lupus familiaris OX=9615 GN=CAST PE=4 SV=3	C_familiaris	6	75	6	1.112	0.986298	1	1	Not Found	Not Found	1	1	1	1	1	1	1	1	1	1	1	1	1	1	1	1	1	1	1	1	1	1	1	1	1	1	1	1	1	1	1	1	1	1	1	1	1
High	E2RT39	Maltase-glucoamylase 2 (putative) OS=Canis lupus familiaris OX=9615 GN=MGAM2 PE=4 SV=3	C_familiaris	16	89	10	0.923	0.995619	1	1	1	1	1	1	1	1	1	1	1	Not Found	1	1	1	1	1	1	1	1	1	1	1	1	1	1	1	1	1	1	1	1	1	1	1	1	1	1	1	1	1
High	F1Q185	Ig-like domain-containing protein OS=Canis lupus familiaris OX=9615 PE=4 SV=3	C_familiaris	2	37	2	1.446	0.952461	1	1	1	1	1	1	1	1	Not Found	1	1	1	1	1	1	1	1	1	1	1	1	1	1	1	1	1	1	1	Not Found	1	1	1	1	1	1	1	1	Not Found	1	1	1
High	E2RD65	Actin-related protein 2/3 complex subunit 5 OS=Canis lupus familiaris OX=9615 GN=ARPC5 PE=3 SV=3	C_familiaris	6	56	6	1.983	0.933819	1	1	1	1	Not Found	Not Found	1	1	1	Not Found	1	Not Found	1	1	1	1	1	1	1	1	1	1	1	1	1	1	1	1	1	1	1	1	1	1	1	1	1	1	1	1	1
High	L7N0E8	Ig-like domain-containing protein OS=Canis lupus familiaris OX=9615 PE=4 SV=2	C_familiaris	6	292	2	2.354	0.933819	1	1	1	1	1	1	1	1	1	Not Found	1	1	1	1	1	Not Found	Not Found	Not Found	1	1	1	1	1	1	1	1	1	1	1	1	1	1	1	1	1	1	1	1	1	1	1
High	F1PKF1	Cell cycle control protein OS=Canis lupus familiaris OX=9615 GN=TMEM30A PE=3 SV=3	C_familiaris	4	9	4	1.391	0.95312	1	1	1	1	1	1	1	1	1	1	1	1	Not Found	Not Found	Not Found	1	1	1	1	1	1	1	1	Not Found	1	1	1	1	1	1	1	1	1	1	1	1	1	1	1	1	1
High	J9P5M2	Lymphocyte specific protein 1 OS=Canis lupus familiaris OX=9615 GN=LSP1 PE=4 SV=2	C_familiaris	6	33	6	2.743	0.89224	1	1	1	1	1	1	1	1	1	Not Found	1	1	1	1	1	1	1	1	1	1	1	1	1	1	1	1	1	1	1	1	1	1	1	Not Found	1	1	Not Found	1	1	1	Not Found
High	E2R5R9	UTP--glucose-1-phosphate uridylyltransferase OS=Canis lupus familiaris OX=9615 GN=UGP2 PE=3 SV=3	C_familiaris	25	361	2	1.859	0.933819	1	1	1	1	Not Found	Not Found	Not Found	1	1	1	1	1	Not Found	Not Found	Not Found	Not Found	1	Not Found	1	1	1	1	Not Found	Not Found	Not Found	Not Found	Not Found	1	1	1	1	1	1	1	1	1	1	1	Not Found	1	1
High	E2RKR9	Proteasome subunit beta OS=Canis lupus familiaris OX=9615 GN=PSMB10 PE=3 SV=3	C_familiaris	3	13	3	16.001	0.0717287	1	1	1	1	Not Found	Not Found	Not Found	Not Found	1	Not Found	1	1	Not Found	Not Found	Not Found	Not Found	1	1	1	1	1	Not Found	Not Found	Not Found	Not Found	Not Found	Not Found	Not Found	Not Found	Not Found	1	1	1	1	1	1	1	1	1	1	1
High	J9NYJ8	RAB6A, member RAS oncogene family OS=Canis lupus familiaris OX=9615 GN=RAB6A PE=4 SV=1	C_familiaris	4	106	2	0.169	0.513543	1	1	1	1	1	Not Found	1	1	1	1	1	1	1	1	1	1	1	Not Found	Not Found	Not Found	Not Found	1	1	1	Not Found	Not Found	Not Found	Not Found	Not Found	Not Found	Not Found	Not Found	Not Found	1	Not Found	1	Not Found	Not Found	Not Found	Not Found	Not Found
High	A0A5F4D491	Dihydrolipoamide S-succinyltransferase OS=Canis lupus familiaris OX=9615 GN=DLST PE=4 SV=1	C_familiaris	3	15	3	1.364	0.96883	Not Found	1	1	Not Found	Not Found	Not Found	Not Found	1	1	1	1	1	1	Not Found	Not Found	1	1	1	Not Found	Not Found	Not Found	Not Found	Not Found	Not Found	Not Found	Not Found	Not Found	Not Found	Not Found	Not Found	Not Found	Not Found	Not Found	Not Found	Not Found	Not Found	Not Found	Not Found	1	1	1
High	F6X6A0	C-type lectin domain containing 11A OS=Canis lupus familiaris OX=9615 GN=CLEC11A PE=4 SV=2	C_familiaris	2	2	2	2.958	0.884543	Not Found	Not Found	1	1	Not Found	Not Found	Not Found	Not Found	Not Found	Not Found	1	Not Found	Not Found	Not Found	Not Found	1	Not Found	Not Found	Not Found	Not Found	Not Found	Not Found	Not Found	Not Found	Not Found	Not Found	Not Found	1	1	1	Not Found	Not Found	Not Found	1	Not Found	Not Found	Not Found	Not Found	1	Not Found	1
High	J9P3G1	Lamin B1 OS=Canis lupus familiaris OX=9615 GN=LMNB1 PE=3 SV=2	C_familiaris	3	5	2	1.498	0.933819	Not Found	Not Found	Not Found	1	Not Found	Not Found	Not Found	Not Found	Not Found	Not Found	Not Found	1	Not Found	Not Found	Not Found	Not Found	Not Found	Not Found	1	1	1	Not Found	Not Found	Not Found	Not Found	Not Found	Not Found	Not Found	Not Found	Not Found	Not Found	Not Found	Not Found	Not Found	Not Found	Not Found	Not Found	Not Found	Not Found	Not Found	1
High	J9NT12	Fibrinogen like 1 OS=Canis lupus familiaris OX=9615 GN=FGL1 PE=4 SV=2	C_familiaris	10	69	10	3.019	0.847605	1	1	1	Not Found	1	1	1	1	1	1	1	1	1	1	Not Found	1	1	1	1	1	1	1	1	1	1	1	1	Not Found	1	1	1	1	1	1	1	1	1	1	1	1	1
High	A0A5F4CR47	Nidogen 1 OS=Canis lupus familiaris OX=9615 GN=NID1 PE=4 SV=1	C_familiaris	8	61	8	2.503	0.910769	1	1	1	1	1	1	1	1	1	1	1	1	Not Found	Not Found	Not Found	1	1	1	1	1	1	1	1	1	1	1	1	1	1	1	1	1	1	1	1	1	1	1	1	1	1
High	E2R3B0	Secretogranin III OS=Canis lupus familiaris OX=9615 GN=SCG3 PE=4 SV=2	C_familiaris	12	55	12	2.473	0.912827	1	1	1	1	1	1	Not Found	1	1	1	1	Not Found	1	1	1	1	1	1	1	1	1	1	1	1	1	1	1	1	1	1	1	1	1	1	1	1	1	1	Not Found	1	1
High	F1Q067	Septin 7 OS=Canis lupus familiaris OX=9615 GN=SEPTIN7 PE=3 SV=3	C_familiaris	8	85	7	1.866	0.933819	1	1	1	1	1	1	Not Found	1	1	1	1	1	1	1	1	1	1	1	1	1	1	1	1	1	1	1	1	1	1	1	1	1	1	1	1	1	1	1	Not Found	Not Found	1
High	A0A5F4BNP2	Uncharacterized protein OS=Canis lupus familiaris OX=9615 PE=4 SV=1	C_familiaris	30	11589	3	1.828	0.933819	1	1	1	1	1	1	1	1	1	1	1	1	1	1	1	1	1	1	1	1	1	1	1	1	1	1	1	1	1	1	1	1	1	1	1	1	1	1	1	1	Not Found
High	J9P5P9	Apolipoprotein B receptor OS=Canis lupus familiaris OX=9615 GN=APOBR PE=4 SV=1	C_familiaris	17	100	17	1.62	0.940478	1	1	1	1	1	1	1	1	1	1	1	1	1	1	1	1	1	1	1	1	1	1	1	1	1	1	1	1	1	1	1	1	1	1	1	1	1	1	Not Found	Not Found	1
High	J9NSQ6	Heparan sulfate proteoglycan 2 OS=Canis lupus familiaris OX=9615 GN=HSPG2 PE=4 SV=2	C_familiaris	15	54	15	1.042	0.995619	1	1	1	1	1	1	1	1	1	Not Found	1	1	1	1	1	Not Found	1	1	1	1	1	1	1	1	1	1	1	1	1	1	1	1	1	1	1	1	1	1	1	1	1
High	E2R7T5	Arachidonate 15-lipoxygenase OS=Canis lupus familiaris OX=9615 GN=ALOX15 PE=3 SV=3	C_familiaris	10	21	10	0.831	0.987033	1	1	1	1	1	1	1	1	1	1	1	1	1	1	1	1	1	1	1	1	1	1	1	1	1	1	1	1	1	1	Not Found	Not Found	1	1	Not Found	1	1	1	1	1	1
High	E2R0P3	Isochorismatase domain containing 1 OS=Canis lupus familiaris OX=9615 GN=ISOC1 PE=4 SV=2	C_familiaris	5	34	5	1.007	0.995619	1	1	1	1	1	1	1	1	1	1	1	1	1	1	1	1	1	1	1	Not Found	1	1	1	1	1	1	1	1	1	1	1	1	1	1	1	1	1	1	Not Found	Not Found	1
High	A0A5F4C4S7	Uncharacterized protein OS=Canis lupus familiaris OX=9615 PE=4 SV=1	C_familiaris	7	255	2	2.738	0.910199	1	1	1	1	1	1	1	Not Found	Not Found	1	Not Found	Not Found	1	1	1	1	1	1	1	1	1	1	Not Found	1	1	1	1	Not Found	1	1	1	1	1	1	1	1	1	1	1	1	1
High	E2QW61	Lipopolysaccharide binding protein OS=Canis lupus familiaris OX=9615 GN=LBP PE=4 SV=3	C_familiaris	3	11	3	1.71	0.938246	1	1	1	1	1	1	Not Found	1	1	1	1	1	1	1	1	Not Found	Not Found	Not Found	1	1	1	1	1	1	1	1	1	1	1	1	1	1	1	1	1	1	1	1	Not Found	Not Found	Not Found
High	A0A5F4DCD2	Uncharacterized protein OS=Canis lupus familiaris OX=9615 GN=DLA-64 PE=4 SV=1	C_familiaris	9	285	2	3.922	0.704492	1	1	1	1	1	1	1	Not Found	1	1	1	1	1	1	1	1	Not Found	1	Not Found	Not Found	Not Found	Not Found	Not Found	Not Found	Not Found	1	1	Not Found	1	1	Not Found	1	Not Found	Not Found	1	1	1	1	1	1	1
High	P12278	Apolipoprotein C-II OS=Canis lupus familiaris OX=9615 GN=APOC2 PE=1 SV=1	C_familiaris	3	14	3	0.905	0.986298	1	1	1	1	1	1	1	Not Found	Not Found	1	Not Found	1	1	1	1	1	Not Found	Not Found	1	1	1	1	1	1	1	1	1	Not Found	Not Found	Not Found	Not Found	Not Found	Not Found	Not Found	1	Not Found	Not Found	Not Found	1	1	Not Found
High	F1P634	Myosin light chain 9 OS=Canis lupus familiaris OX=9615 GN=MYL9 PE=4 SV=2	C_familiaris	9	141	3	1.476	0.952439	1	1	1	1	Not Found	Not Found	Not Found	1	1	Not Found	1	1	1	1	1	1	1	1	Not Found	Not Found	Not Found	Not Found	Not Found	Not Found	1	1	1	Not Found	Not Found	1	Not Found	Not Found	1	1	1	Not Found	Not Found	Not Found	1	1	1
High	A0A5F4DIK8	Four and a half LIM domains 1 OS=Canis lupus familiaris OX=9615 GN=FHL1 PE=4 SV=1	C_familiaris	5	35	5	1.249	0.964501	Not Found	Not Found	1	1	Not Found	Not Found	Not Found	1	1	1	Not Found	1	1	1	1	1	1	1	1	1	1	Not Found	Not Found	Not Found	Not Found	Not Found	Not Found	Not Found	Not Found	Not Found	Not Found	Not Found	Not Found	1	1	Not Found	Not Found	Not Found	1	Not Found	1
High	E2RQC9	RuvB-like helicase OS=Canis lupus familiaris OX=9615 GN=RUVBL1 PE=3 SV=2	C_familiaris	2	5	2	2.072	0.933819	Not Found	Not Found	1	Not Found	Not Found	1	1	1	1	1	1	Not Found	1	1	1	1	1	1	Not Found	Not Found	Not Found	Not Found	Not Found	1	1	1	Not Found	1	Not Found	1	Not Found	1	1	1	1	Not Found	Not Found	1	Not Found	Not Found	Not Found
High	E2RKJ1	Cell cycle and apoptosis regulator 2 OS=Canis lupus familiaris OX=9615 GN=CCAR2 PE=4 SV=2	C_familiaris	2	2	2	0.786	0.96883	1	Not Found	Not Found	Not Found	Not Found	Not Found	Not Found	1	1	Not Found	Not Found	Not Found	Not Found	Not Found	Not Found	Not Found	Not Found	Not Found	Not Found	Not Found	Not Found	Not Found	Not Found	Not Found	1	1	1	1	1	1	1	1	1	1	1	Not Found	1	1	Not Found	Not Found	Not Found
High	F1Q4F1	Oxysterol-binding protein OS=Canis lupus familiaris OX=9615 GN=OSBP PE=3 SV=3	C_familiaris	2	4	2	1.501	0.952731	Not Found	1	Not Found	Not Found	Not Found	Not Found	Not Found	Not Found	1	1	1	1	Not Found	Not Found	Not Found	1	Not Found	Not Found	Not Found	Not Found	Not Found	1	1	1	Not Found	Not Found	Not Found	Not Found	Not Found	Not Found	Not Found	Not Found	Not Found	Not Found	Not Found	Not Found	Not Found	Not Found	Not Found	Not Found	Not Found
High	A0A5F4CSJ2	Protein tyrosine phosphatase receptor type F OS=Canis lupus familiaris OX=9615 GN=PTPRF PE=4 SV=1	C_familiaris	8	26	8	2.392	0.930865	1	1	1	1	1	1	1	1	1	1	1	1	Not Found	1	1	1	1	1	1	1	1	Not Found	Not Found	Not Found	1	1	1	1	1	1	1	1	1	1	1	1	1	1	1	1	1
High	A0A5F4C477	Fibulin 1 OS=Canis lupus familiaris OX=9615 GN=FBLN1 PE=4 SV=1	C_familiaris	18	614	3	0.721	0.953219	1	1	1	1	1	1	1	1	1	Not Found	Not Found	Not Found	1	1	1	1	1	1	1	1	1	1	1	1	1	1	1	1	1	1	1	1	1	1	1	1	1	1	1	1	1
High	A0A5F4C5A8	Uncharacterized protein OS=Canis lupus familiaris OX=9615 PE=4 SV=1	C_familiaris	8	965	2	0.926	0.995619	1	1	1	1	1	1	1	1	1	Not Found	Not Found	1	1	1	1	1	1	1	1	1	1	1	1	1	1	1	1	1	1	1	1	1	1	1	1	1	1	1	1	1	1
High	F1PD77	Proteasome activator subunit 2 OS=Canis lupus familiaris OX=9615 GN=PSME2 PE=4 SV=2	C_familiaris	7	29	7	1.019	0.997778	1	1	1	1	1	1	1	1	1	1	1	1	1	1	1	1	1	1	1	1	1	1	1	1	1	1	1	1	1	1	1	1	1	1	1	1	1	1	1	1	Not Found
High	A0A5F4CYD3	Coenzyme Q10B OS=Canis lupus familiaris OX=9615 GN=COQ10B PE=4 SV=1	C_familiaris	3	13	3	1.427	0.953219	1	1	1	1	1	1	Not Found	1	1	1	1	1	1	1	1	1	1	1	1	1	1	1	1	1	1	Not Found	Not Found	Not Found	1	1	1	1	1	Not Found	Not Found	1	Not Found	1	Not Found	1	1
High	F1PDC7	Notch receptor 1 OS=Canis lupus familiaris OX=9615 GN=NOTCH1 PE=4 SV=3	C_familiaris	13	62	13	2.226	0.933819	Not Found	1	1	1	Not Found	Not Found	1	1	1	1	1	1	1	1	1	1	1	Not Found	1	1	1	Not Found	Not Found	Not Found	1	1	1	1	1	1	1	1	1	1	1	1	1	1	Not Found	Not Found	1
High	A0A5F4CI63	Latent transforming growth factor beta binding protein 1 OS=Canis lupus familiaris OX=9615 GN=LTBP1 PE=4 SV=1	C_familiaris	7	23	7	1.041	0.995619	Not Found	1	Not Found	Not Found	1	Not Found	Not Found	Not Found	1	1	Not Found	1	Not Found	1	Not Found	1	1	1	Not Found	1	Not Found	Not Found	1	1	1	1	1	1	1	1	1	1	1	1	1	1	1	1	1	1	Not Found
High	F1PRR4	Vasodilator-stimulated phosphoprotein OS=Canis lupus familiaris OX=9615 GN=VASP PE=3 SV=1	C_familiaris	15	561	2	1.762	0.938246	1	1	1	1	Not Found	1	1	Not Found	1	1	1	1	Not Found	1	Not Found	1	1	1	Not Found	1	Not Found	1	Not Found	Not Found	1	Not Found	Not Found	1	Not Found	1	1	1	Not Found	1	1	1	1	1	Not Found	Not Found	1
High	E2RQ54	Ig-like domain-containing protein OS=Canis lupus familiaris OX=9615 GN=LY6G6F PE=4 SV=1	C_familiaris	3	7	3	1.861	0.933819	Not Found	1	1	1	Not Found	Not Found	Not Found	1	1	1	1	1	Not Found	Not Found	Not Found	1	1	Not Found	Not Found	Not Found	Not Found	Not Found	Not Found	Not Found	1	1	1	1	1	1	Not Found	Not Found	1	1	1	1	1	1	1	1	1
High	F1Q1H3	Programmed cell death 6 OS=Canis lupus familiaris OX=9615 GN=PDCD6 PE=4 SV=3	C_familiaris	2	3	2	0.839	0.999304	Not Found	Not Found	1	1	1	Not Found	Not Found	1	Not Found	1	1	Not Found	1	1	Not Found	Not Found	1	Not Found	Not Found	Not Found	1	1	Not Found	Not Found	1	Not Found	1	1	1	1	Not Found	Not Found	Not Found	Not Found	Not Found	Not Found	Not Found	Not Found	1	Not Found	1
High	A0A5F4DFK8	Aconitase 2 OS=Canis lupus familiaris OX=9615 GN=ACO2 PE=4 SV=1	C_familiaris	2	8	2	3.2	0.855235	1	Not Found	Not Found	Not Found	Not Found	Not Found	Not Found	Not Found	Not Found	Not Found	Not Found	1	1	1	1	1	1	1	Not Found	Not Found	Not Found	Not Found	Not Found	Not Found	1	Not Found	Not Found	1	1	1	Not Found	1	Not Found	Not Found	1	Not Found	1	Not Found	Not Found	Not Found	Not Found
High	F1PJM1	Fibulin 5 OS=Canis lupus familiaris OX=9615 GN=FBLN5 PE=4 SV=2	C_familiaris	3	7	3	0.751	0.995619	Not Found	Not Found	Not Found	Not Found	Not Found	Not Found	Not Found	Not Found	Not Found	Not Found	Not Found	Not Found	Not Found	1	Not Found	1	1	Not Found	Not Found	Not Found	Not Found	Not Found	Not Found	1	1	1	1	1	1	1	1	1	Not Found	Not Found	Not Found	Not Found	Not Found	Not Found	Not Found	Not Found	1
High	A0A5F4C7B8	Two pore segment channel 2 OS=Canis lupus familiaris OX=9615 GN=TPCN2 PE=4 SV=1	C_familiaris	2	3	2	1.983	0.933819	Not Found	Not Found	Not Found	Not Found	Not Found	Not Found	Not Found	1	1	Not Found	1	1	Not Found	Not Found	Not Found	Not Found	Not Found	Not Found	Not Found	Not Found	Not Found	1	1	1	Not Found	Not Found	Not Found	Not Found	Not Found	Not Found	Not Found	Not Found	1	1	1	Not Found	Not Found	Not Found	Not Found	Not Found	Not Found
High	F1PVR5	Uncharacterized protein OS=Canis lupus familiaris OX=9615 PE=4 SV=3	C_familiaris	5	10	5	1.505	0.952439	Not Found	Not Found	Not Found	1	Not Found	Not Found	Not Found	Not Found	1	1	1	1	Not Found	Not Found	Not Found	Not Found	Not Found	1	Not Found	Not Found	Not Found	Not Found	Not Found	Not Found	Not Found	1	Not Found	Not Found	1	Not Found	Not Found	Not Found	Not Found	Not Found	Not Found	Not Found	Not Found	1	Not Found	Not Found	Not Found
High	A0A5F4DLE0	Uncharacterized protein OS=Canis lupus familiaris OX=9615 PE=4 SV=1	C_familiaris	3	201	2	2.165	0.933819	1	1	1	1	1	1	1	1	1	1	1	1	1	1	1	1	1	1	1	1	1	1	1	1	1	1	1	1	1	1	1	1	1	1	1	1	1	1	Not Found	Not Found	1
High	J9NYC0	Microfibril associated protein 4 OS=Canis lupus familiaris OX=9615 GN=MFAP4 PE=4 SV=2	C_familiaris	2	50	2	0.521	0.935358	1	1	Not Found	Not Found	1	1	1	1	1	1	1	1	1	1	1	1	1	1	1	1	1	1	1	1	1	1	1	1	1	1	1	1	1	1	1	1	1	1	1	1	Not Found
High	F1PHK9	Laminin subunit gamma 1 OS=Canis lupus familiaris OX=9615 GN=LAMC1 PE=4 SV=2	C_familiaris	15	56	15	1.394	0.952731	1	1	1	1	1	1	1	1	1	1	1	1	1	1	1	1	1	1	1	1	1	1	1	1	1	1	1	1	1	1	1	1	1	1	1	Not Found	Not Found	Not Found	1	Not Found	1
High	F1PQ91	Insulin like growth factor binding protein 3 OS=Canis lupus familiaris OX=9615 GN=IGFBP3 PE=4 SV=2	C_familiaris	3	27	3	0.731	0.956644	1	1	1	1	1	1	1	1	1	1	1	1	Not Found	Not Found	1	1	1	1	Not Found	Not Found	Not Found	1	1	1	1	1	1	1	1	1	1	1	1	1	1	1	1	1	1	1	1
High	A0A5F4CQG9	Uncharacterized protein OS=Canis lupus familiaris OX=9615 PE=4 SV=1	C_familiaris	7	2812	2	1.009	0.99563	1	1	1	1	1	1	1	1	1	Not Found	Not Found	Not Found	1	1	1	1	1	1	1	1	1	1	1	1	1	1	1	1	1	1	1	Not Found	1	1	1	Not Found	1	1	1	1	Not Found
High	J9NY79	Malate dehydrogenase OS=Canis lupus familiaris OX=9615 PE=3 SV=2	C_familiaris	7	38	7	1.991	0.933819	1	1	1	1	Not Found	Not Found	Not Found	1	1	1	1	1	1	1	1	1	1	1	Not Found	1	Not Found	1	1	1	1	1	Not Found	1	Not Found	1	Not Found	1	Not Found	Not Found	Not Found	1	Not Found	1	1	1	1
High	F1PHP1	Thioredoxin domain containing 5 OS=Canis lupus familiaris OX=9615 GN=TXNDC5 PE=3 SV=2	C_familiaris	2	11	2	2.333	0.933819	1	1	1	1	1	1	1	Not Found	Not Found	Not Found	1	1	1	1	1	Not Found	1	1	1	Not Found	1	Not Found	Not Found	Not Found	1	1	Not Found	1	Not Found	1	1	Not Found	1	1	1	Not Found	1	1	1	Not Found	1
High	J9NYK7	Uncharacterized protein OS=Canis lupus familiaris OX=9615 GN=MYADM PE=4 SV=1	C_familiaris	3	12	3	0.834	0.979433	1	1	1	1	1	1	1	1	1	1	1	1	1	1	1	1	1	1	1	1	1	Not Found	Not Found	Not Found	Not Found	Not Found	Not Found	1	1	Not Found	Not Found	1	Not Found	Not Found	Not Found	1	Not Found	1	Not Found	Not Found	1
High	A0A5F4C634	Sarcoplasmic/endoplasmic reticulum calcium ATPase 2 OS=Canis lupus familiaris OX=9615 GN=ATP2A2 PE=4 SV=1	C_familiaris	5	17	2	5.805	0.438559	Not Found	Not Found	1	1	Not Found	Not Found	1	1	1	Not Found	Not Found	Not Found	Not Found	Not Found	1	1	1	1	Not Found	Not Found	Not Found	1	Not Found	Not Found	Not Found	1	1	1	1	1	1	1	1	Not Found	1	1	1	1	Not Found	Not Found	1
High	F1PXU1	Spectrin beta chain OS=Canis lupus familiaris OX=9615 GN=SPTBN1 PE=3 SV=3	C_familiaris	12	223	8	1.886	0.935358	1	1	1	1	Not Found	1	Not Found	1	1	Not Found	1	1	1	1	1	Not Found	1	Not Found	Not Found	Not Found	Not Found	Not Found	Not Found	Not Found	Not Found	Not Found	1	1	1	Not Found	1	1	Not Found	1	1	1	1	Not Found	1	1	Not Found
High	F1PAA9	Cadherin-1 OS=Canis lupus familiaris OX=9615 GN=CDH1 PE=1 SV=2	C_familiaris	6	16	6	2.925	0.876803	1	Not Found	Not Found	Not Found	Not Found	Not Found	Not Found	1	1	1	1	1	1	1	1	1	1	1	Not Found	Not Found	1	1	1	1	Not Found	Not Found	Not Found	1	1	1	1	1	Not Found	Not Found	Not Found	1	1	1	Not Found	1	Not Found
High	P01874	Ig mu chain C region OS=Canis lupus familiaris OX=9615 PE=1 SV=1	C_familiaris	3	722	2	2.38	0.933819	1	1	1	1	1	1	Not Found	1	1	1	1	Not Found	1	1	1	1	1	1	1	1	1	1	1	1	1	Not Found	1	Not Found	1	1	1	1	1	1	1	1	1	1	1	1	1
High	A0A5F4CWH4	cGMP-specific 3',5'-cyclic phosphodiesterase OS=Canis lupus familiaris OX=9615 GN=PDE5A PE=4 SV=1	C_familiaris	2	3	2	1.515	0.944788	1	1	1	1	1	1	1	1	1	1	1	Not Found	1	1	1	1	1	1	1	1	1	Not Found	Not Found	Not Found	1	Not Found	Not Found	1	1	Not Found	1	1	1	Not Found	Not Found	1	1	1	Not Found	Not Found	1
High	A0A5F4BRN0	Hepatocyte growth factor-regulated tyrosine kinase substrate OS=Canis lupus familiaris OX=9615 GN=HGS PE=4 SV=1	C_familiaris	2	2	2	1.293	0.96883	1	Not Found	Not Found	Not Found	1	1	1	1	1	Not Found	1	1	1	1	1	Not Found	Not Found	Not Found	1	Not Found	Not Found	Not Found	1	1	1	1	1	1	1	1	1	1	Not Found	Not Found	Not Found	1	1	Not Found	Not Found	Not Found	Not Found
High	E2QTA2	Papilin, proteoglycan like sulfated glycoprotein OS=Canis lupus familiaris OX=9615 GN=PAPLN PE=4 SV=2	C_familiaris	5	19	5	1.44	0.952461	1	1	1	1	1	1	1	1	1	1	1	1	1	1	Not Found	Not Found	1	Not Found	1	1	1	1	1	1	Not Found	Not Found	Not Found	1	Not Found	Not Found	Not Found	Not Found	Not Found	Not Found	Not Found	1	1	1	Not Found	Not Found	Not Found
High	J9P749	Tight junction protein ZO-2 OS=Canis lupus familiaris OX=9615 GN=TJP2 PE=3 SV=2	C_familiaris	2	6	2	1.935	0.938246	Not Found	Not Found	Not Found	Not Found	1	Not Found	1	Not Found	1	1	1	Not Found	Not Found	Not Found	Not Found	Not Found	Not Found	1	1	Not Found	1	1	Not Found	Not Found	Not Found	Not Found	Not Found	Not Found	Not Found	Not Found	Not Found	Not Found	Not Found	Not Found	Not Found	Not Found	Not Found	Not Found	Not Found	Not Found	Not Found
High	F1PS94	Notch receptor 2 OS=Canis lupus familiaris OX=9615 GN=NOTCH2 PE=4 SV=3	C_familiaris	14	68	14	2.592	0.89771	1	Not Found	Not Found	Not Found	1	Not Found	1	1	Not Found	1	Not Found	1	1	1	1	1	1	1	1	1	1	1	1	1	1	1	1	1	1	1	1	1	1	1	1	1	1	1	1	Not Found	1
High	A0A5F4DJC7	Uncharacterized protein OS=Canis lupus familiaris OX=9615 PE=4 SV=1	C_familiaris	9	631	2	1.549	0.952731	1	1	1	Not Found	1	1	1	Not Found	Not Found	Not Found	1	1	1	1	1	1	1	1	1	1	1	1	1	1	1	1	1	1	1	1	1	1	1	1	1	1	1	1	Not Found	Not Found	1
High	J9P153	Latent transforming growth factor beta binding protein 2 OS=Canis lupus familiaris OX=9615 GN=LTBP2 PE=4 SV=1	C_familiaris	6	18	6	4.051	0.654372	1	1	1	1	1	1	1	1	1	Not Found	1	1	Not Found	Not Found	Not Found	Not Found	Not Found	Not Found	Not Found	Not Found	Not Found	Not Found	Not Found	Not Found	1	1	1	1	1	1	1	1	1	1	1	1	1	1	1	1	1
High	A0A5F4CIT2	Plexin domain containing 2 OS=Canis lupus familiaris OX=9615 GN=PLXDC2 PE=4 SV=1	C_familiaris	3	5	3	1.85	0.933819	1	1	1	1	1	1	1	1	1	Not Found	1	1	Not Found	Not Found	Not Found	1	1	Not Found	Not Found	Not Found	Not Found	1	1	1	Not Found	Not Found	1	1	Not Found	1	1	1	Not Found	Not Found	1	1	Not Found	1	Not Found	Not Found	Not Found
High	J9P6K8	tRNA(His) guanylyltransferase OS=Canis lupus familiaris OX=9615 GN=THG1L PE=3 SV=1	C_familiaris	2	5	2	1.591	0.944788	1	Not Found	1	1	1	1	1	1	1	1	1	1	Not Found	Not Found	Not Found	Not Found	Not Found	Not Found	Not Found	1	1	Not Found	Not Found	Not Found	Not Found	1	Not Found	1	1	Not Found	1	Not Found	1	1	1	1	Not Found	Not Found	Not Found	Not Found	Not Found
High	F1PAK0	Cathepsin S OS=Canis lupus familiaris OX=9615 GN=CTSS PE=3 SV=2	C_familiaris	2	12	2	1.705	0.938246	Not Found	Not Found	Not Found	1	Not Found	Not Found	Not Found	Not Found	1	1	Not Found	Not Found	1	1	1	1	1	1	Not Found	1	1	1	1	1	Not Found	1	1	Not Found	Not Found	Not Found	Not Found	Not Found	1	1	1	Not Found	1	1	Not Found	Not Found	1
High	A0A5F4CGF8	Abl interactor 2 OS=Canis lupus familiaris OX=9615 GN=ABI2 PE=4 SV=1	C_familiaris	2	2	2	2.757	0.847605	1	Not Found	1	Not Found	1	Not Found	1	1	Not Found	Not Found	1	Not Found	Not Found	Not Found	Not Found	Not Found	Not Found	Not Found	Not Found	Not Found	Not Found	Not Found	Not Found	Not Found	1	1	Not Found	Not Found	Not Found	Not Found	Not Found	Not Found	Not Found	Not Found	1	Not Found	1	1	Not Found	Not Found	Not Found
High	E2RMA7	Dynein cytoplasmic 1 intermediate chain 2 OS=Canis lupus familiaris OX=9615 GN=DYNC1I2 PE=4 SV=3	C_familiaris	2	5	2	1.848	0.933819	Not Found	Not Found	Not Found	Not Found	Not Found	Not Found	Not Found	1	Not Found	Not Found	1	1	Not Found	Not Found	Not Found	1	1	1	Not Found	1	Not Found	Not Found	Not Found	Not Found	Not Found	Not Found	Not Found	Not Found	Not Found	Not Found	Not Found	Not Found	Not Found	Not Found	Not Found	Not Found	Not Found	Not Found	Not Found	Not Found	1
High	F1Q3Z2	Murine retrovirus integration site 1 homolog OS=Canis lupus familiaris OX=9615 GN=MRVI1 PE=4 SV=3	C_familiaris	2	7	2	2.045	0.933819	Not Found	Not Found	Not Found	1	Not Found	Not Found	Not Found	Not Found	Not Found	Not Found	Not Found	Not Found	Not Found	1	Not Found	1	Not Found	1	Not Found	Not Found	Not Found	Not Found	Not Found	Not Found	Not Found	Not Found	Not Found	Not Found	Not Found	Not Found	1	1	Not Found	Not Found	Not Found	1	1	Not Found	Not Found	Not Found	1
High	A0A5F4D8H7	MIA SH3 domain ER export factor 3 OS=Canis lupus familiaris OX=9615 GN=MIA3 PE=4 SV=1	C_familiaris	3	10	3	2.889	0.890127	1	Not Found	Not Found	Not Found	1	Not Found	Not Found	Not Found	Not Found	Not Found	Not Found	Not Found	Not Found	Not Found	Not Found	1	1	1	Not Found	Not Found	Not Found	Not Found	Not Found	Not Found	Not Found	Not Found	Not Found	Not Found	Not Found	Not Found	Not Found	Not Found	Not Found	Not Found	Not Found	Not Found	Not Found	Not Found	Not Found	Not Found	Not Found
High	E2RH46	Uncharacterized protein OS=Canis lupus familiaris OX=9615 PE=4 SV=3	C_familiaris	6	19	6	1.988	0.933819	1	Not Found	1	1	1	1	1	1	Not Found	Not Found	Not Found	Not Found	1	1	1	1	1	1	1	1	1	1	1	1	1	1	1	1	1	1	1	1	1	1	1	1	1	1	1	1	Not Found
High	A0A5F4CKE9	Uncharacterized protein OS=Canis lupus familiaris OX=9615 GN=MAP4 PE=4 SV=1	C_familiaris	12	56	12	1.441	0.952461	1	1	1	1	1	1	1	1	1	1	1	1	1	1	1	1	1	1	1	1	1	1	1	Not Found	Not Found	Not Found	Not Found	1	1	1	1	1	Not Found	Not Found	Not Found	1	1	1	1	1	1
High	E2RA67	C-C motif chemokine OS=Canis lupus familiaris OX=9615 GN=CCL14 PE=3 SV=2	C_familiaris	4	67	4	3.253	0.825142	1	Not Found	1	1	1	1	1	1	1	1	1	1	Not Found	Not Found	1	1	1	1	Not Found	Not Found	Not Found	1	1	1	Not Found	Not Found	1	1	1	1	1	1	1	1	1	1	1	1	1	1	1
High	A0A5F4D071	Uncharacterized protein OS=Canis lupus familiaris OX=9615 PE=4 SV=1	C_familiaris	3	867	2	2.231	0.933819	1	1	1	1	1	1	1	1	Not Found	Not Found	1	Not Found	1	Not Found	Not Found	1	1	1	1	1	1	1	Not Found	Not Found	1	1	1	1	1	1	1	1	1	1	1	1	1	1	1	1	1
High	J9NXY7	PDZ and LIM domain 1 OS=Canis lupus familiaris OX=9615 GN=PDLIM1 PE=4 SV=2	C_familiaris	7	28	7	2.922	0.854371	1	Not Found	1	1	Not Found	Not Found	Not Found	1	1	1	1	Not Found	1	1	1	1	1	1	Not Found	Not Found	Not Found	Not Found	1	1	1	1	1	1	1	1	1	1	1	1	1	1	1	Not Found	1	1	1
High	Q2PT31	Myocilin OS=Canis lupus familiaris OX=9615 GN=MYOC PE=1 SV=2	C_familiaris	8	27	8	2.363	0.933819	1	1	1	1	1	1	1	Not Found	1	1	1	1	Not Found	1	1	1	1	1	1	1	Not Found	1	1	1	Not Found	Not Found	Not Found	1	1	1	1	1	1	1	Not Found	1	1	1	Not Found	Not Found	1
High	A0A5F4C8H0	Glucosamine-6-phosphate deaminase 2 OS=Canis lupus familiaris OX=9615 GN=GNPDA2 PE=4 SV=1	C_familiaris	8	146	4	0.537	0.935358	1	1	1	1	1	1	1	1	1	1	1	1	1	1	1	1	1	1	1	1	1	1	1	1	Not Found	Not Found	Not Found	Not Found	Not Found	1	1	1	1	1	1	1	1	1	Not Found	Not Found	Not Found
High	E2RR68	Niban apoptosis regulator 2 OS=Canis lupus familiaris OX=9615 GN=NIBAN2 PE=4 SV=1	C_familiaris	3	4	3	1.494	0.944788	Not Found	1	1	1	1	Not Found	1	1	1	Not Found	1	1	1	Not Found	Not Found	Not Found	Not Found	Not Found	1	Not Found	1	Not Found	Not Found	1	1	1	1	1	Not Found	1	1	1	1	Not Found	1	1	1	1	Not Found	Not Found	1
High	E2RQY6	Calcium-transporting ATPase OS=Canis lupus familiaris OX=9615 GN=ATP2A3 PE=3 SV=2	C_familiaris	11	48	8	3.06	0.845252	1	Not Found	1	1	1	1	Not Found	Not Found	1	1	Not Found	1	1	1	1	1	1	1	1	Not Found	Not Found	1	Not Found	Not Found	Not Found	1	Not Found	Not Found	1	Not Found	Not Found	Not Found	Not Found	1	Not Found	1	1	1	1	Not Found	Not Found
High	E2RKK6	Protein kinase C substrate 80K-H OS=Canis lupus familiaris OX=9615 GN=PRKCSH PE=4 SV=2	C_familiaris	3	27	3	2.97	0.884543	Not Found	1	1	Not Found	1	1	Not Found	Not Found	1	1	1	1	Not Found	Not Found	1	1	1	Not Found	1	1	1	1	Not Found	Not Found	Not Found	Not Found	Not Found	1	Not Found	Not Found	1	1	Not Found	Not Found	1	Not Found	1	1	Not Found	Not Found	1
High	F1PMK7	Matrix metallopeptidase 2 OS=Canis lupus familiaris OX=9615 GN=MMP2 PE=3 SV=3	C_familiaris	3	13	3	0.876	0.980905	1	1	Not Found	Not Found	Not Found	1	Not Found	1	1	1	1	Not Found	1	1	1	1	1	1	1	1	1	1	1	1	Not Found	1	Not Found	1	1	Not Found	Not Found	Not Found	Not Found	Not Found	Not Found	1	1	1	Not Found	Not Found	Not Found
High	A0A5F4C3J1	Uncharacterized protein OS=Canis lupus familiaris OX=9615 PE=4 SV=1	C_familiaris	5	84	2	1.015	0.995619	1	1	1	1	1	1	1	Not Found	Not Found	1	1	1	1	1	1	1	Not Found	Not Found	1	1	1	1	Not Found	Not Found	Not Found	Not Found	Not Found	Not Found	Not Found	Not Found	1	Not Found	Not Found	Not Found	Not Found	Not Found	1	Not Found	Not Found	Not Found	1
High	F1PWR1	Insulin like growth factor 2 receptor OS=Canis lupus familiaris OX=9615 GN=IGF2R PE=4 SV=3	C_familiaris	2	2	2	1.436	0.953219	1	1	1	1	1	1	1	Not Found	1	1	1	Not Found	Not Found	Not Found	Not Found	1	Not Found	1	1	Not Found	1	Not Found	Not Found	Not Found	Not Found	Not Found	Not Found	Not Found	Not Found	Not Found	Not Found	Not Found	Not Found	Not Found	Not Found	Not Found	Not Found	Not Found	Not Found	Not Found	1
High	E2QX82	Protocadherin 12 OS=Canis lupus familiaris OX=9615 GN=PCDH12 PE=4 SV=2	C_familiaris	3	6	3	1.715	0.935358	Not Found	Not Found	Not Found	Not Found	Not Found	Not Found	1	Not Found	1	1	Not Found	Not Found	1	Not Found	Not Found	Not Found	1	1	Not Found	Not Found	1	1	Not Found	1	Not Found	Not Found	Not Found	1	1	1	1	1	Not Found	Not Found	Not Found	Not Found	Not Found	Not Found	Not Found	Not Found	Not Found
High	E2R9U8	Eukaryotic translation elongation factor 1 delta OS=Canis lupus familiaris OX=9615 GN=EEF1D PE=3 SV=3	C_familiaris	3	29	3	4.223	0.650726	Not Found	Not Found	Not Found	1	Not Found	Not Found	Not Found	1	1	Not Found	1	Not Found	1	1	1	1	1	1	1	1	1	1	1	1	1	1	1	1	1	1	1	1	1	1	1	1	1	1	1	1	1
High	F1PIF2	Cathepsin Z OS=Canis lupus familiaris OX=9615 GN=CTSZ PE=3 SV=3	C_familiaris	7	55	7	2.568	0.905373	1	1	1	1	1	1	1	1	1	1	1	1	1	1	1	Not Found	Not Found	1	1	1	1	Not Found	1	Not Found	1	Not Found	1	1	1	Not Found	1	1	1	1	Not Found	Not Found	1	1	Not Found	1	1
High	J9NYN4	Uncharacterized protein OS=Canis lupus familiaris OX=9615 GN=TGOLN2 PE=4 SV=1	C_familiaris	4	42	4	1.816	0.935358	1	1	1	1	1	1	1	Not Found	1	Not Found	Not Found	Not Found	1	1	1	Not Found	Not Found	1	1	1	1	1	Not Found	1	1	Not Found	1	1	1	1	1	1	1	1	1	1	1	1	1	1	1
High	L7N0E5	Ig-like domain-containing protein OS=Canis lupus familiaris OX=9615 PE=4 SV=2	C_familiaris	3	65	3	5.216	0.504983	1	1	1	1	1	1	1	1	1	1	1	Not Found	Not Found	Not Found	Not Found	Not Found	Not Found	Not Found	1	1	1	Not Found	Not Found	Not Found	1	1	1	1	1	1	1	1	1	1	1	1	1	1	1	1	1
High	A0A5F4D168	Serum amyloid A protein OS=Canis lupus familiaris OX=9615 GN=SAA1 PE=4 SV=1	C_familiaris	3	8	3	2.077	0.933819	1	Not Found	1	1	Not Found	1	1	1	1	1	Not Found	Not Found	Not Found	1	Not Found	1	1	1	1	Not Found	Not Found	Not Found	Not Found	1	1	1	1	1	Not Found	1	1	1	1	1	Not Found	1	Not Found	1	Not Found	1	Not Found
High	E2RQ04	Proline rich coiled-coil 1 OS=Canis lupus familiaris OX=9615 GN=PRRC1 PE=4 SV=2	C_familiaris	2	3	2	2.545	0.884543	1	1	1	Not Found	1	Not Found	1	1	1	1	1	1	1	1	1	Not Found	Not Found	1	1	1	1	1	1	1	Not Found	Not Found	Not Found	Not Found	Not Found	1	Not Found	1	Not Found	Not Found	Not Found	Not Found	1	1	Not Found	Not Found	1
High	F1P9L1	S-methyl-5'-thioadenosine phosphorylase OS=Canis lupus familiaris OX=9615 GN=MTAP PE=3 SV=3	C_familiaris	5	11	5	0.734	0.953219	Not Found	Not Found	1	Not Found	Not Found	1	1	1	1	1	Not Found	1	1	1	1	1	1	1	1	1	1	Not Found	Not Found	Not Found	Not Found	Not Found	1	1	1	1	Not Found	Not Found	Not Found	Not Found	Not Found	Not Found	Not Found	Not Found	Not Found	Not Found	1
High	A0A5F4CA83	LRR binding FLII interacting protein 2 OS=Canis lupus familiaris OX=9615 GN=LRRFIP2 PE=4 SV=1	C_familiaris	4	14	3	2.023	0.933819	1	Not Found	1	1	1	1	Not Found	1	1	1	Not Found	1	Not Found	1	1	Not Found	1	1	Not Found	1	Not Found	Not Found	Not Found	1	Not Found	Not Found	Not Found	Not Found	Not Found	Not Found	Not Found	Not Found	Not Found	Not Found	Not Found	Not Found	Not Found	1	Not Found	Not Found	1
High	E2R125	Perilipin OS=Canis lupus familiaris OX=9615 GN=PLIN3 PE=3 SV=2	C_familiaris	2	5	2	0.492	0.933819	Not Found	1	Not Found	1	Not Found	Not Found	Not Found	Not Found	Not Found	Not Found	Not Found	Not Found	1	Not Found	Not Found	Not Found	Not Found	Not Found	Not Found	Not Found	Not Found	Not Found	Not Found	Not Found	Not Found	Not Found	Not Found	1	1	1	1	Not Found	Not Found	Not Found	Not Found	Not Found	1	Not Found	Not Found	Not Found	1
High	E2RKG6	Dermokine OS=Canis lupus familiaris OX=9615 GN=DMKN PE=4 SV=3	C_familiaris	5	38	5	2.486	0.922889	1	1	1	1	1	1	1	1	Not Found	1	1	1	Not Found	1	Not Found	1	1	1	1	1	1	1	1	1	1	1	1	1	1	1	1	Not Found	Not Found	1	Not Found	1	Not Found	Not Found	1	1	Not Found
High	A0A5F4CXZ9	Uncharacterized protein OS=Canis lupus familiaris OX=9615 GN=MYL6 PE=4 SV=1	C_familiaris	6	36	6	2.02	0.933819	1	1	1	1	Not Found	1	1	1	1	1	1	1	1	1	1	1	1	1	Not Found	Not Found	Not Found	Not Found	Not Found	Not Found	1	1	1	1	1	1	1	1	Not Found	Not Found	Not Found	1	1	Not Found	1	1	1
High	F1PLR6	Bridging integrator 1 OS=Canis lupus familiaris OX=9615 GN=BIN1 PE=3 SV=3	C_familiaris	18	232	2	0.916	0.995619	Not Found	1	Not Found	Not Found	Not Found	Not Found	Not Found	1	1	1	1	1	1	1	1	1	1	1	1	1	1	1	1	1	Not Found	Not Found	Not Found	1	1	1	1	1	1	1	1	1	1	1	Not Found	Not Found	1
High	J9PA20	Uncharacterized protein OS=Canis lupus familiaris OX=9615 PE=4 SV=2	C_familiaris	7	27	6	1.281	0.961582	1	1	1	1	1	1	1	1	1	1	1	1	Not Found	Not Found	Not Found	Not Found	Not Found	1	1	1	1	1	1	Not Found	1	Not Found	Not Found	1	1	1	Not Found	Not Found	1	1	Not Found	1	1	1	1	1	1
High	A0A5F4CE33	Triggering receptor expressed on myeloid cells 2 OS=Canis lupus familiaris OX=9615 GN=TREM2 PE=4 SV=1	C_familiaris	5	44	5	1.928	0.933819	1	1	1	1	1	1	1	1	1	1	1	Not Found	Not Found	Not Found	Not Found	1	1	1	Not Found	1	1	1	1	1	1	Not Found	Not Found	Not Found	1	1	1	1	Not Found	Not Found	Not Found	1	1	1	Not Found	Not Found	1
High	A0A5F4CJR2	Hypoxia up-regulated 1 OS=Canis lupus familiaris OX=9615 GN=HYOU1 PE=4 SV=1	C_familiaris	2	5	2	4.832	0.586622	1	1	1	1	1	1	1	1	1	1	Not Found	1	Not Found	Not Found	Not Found	Not Found	1	Not Found	1	1	1	1	1	1	Not Found	1	Not Found	1	1	1	1	Not Found	1	1	Not Found	1	1	1	1	Not Found	1
High	F1PGZ1	Beta-1,4-galactosyltransferase 1 OS=Canis lupus familiaris OX=9615 GN=B4GALT1 PE=4 SV=3	C_familiaris	3	9	3	4.712	0.513937	1	1	1	1	Not Found	Not Found	Not Found	1	1	1	Not Found	1	1	1	Not Found	1	1	1	Not Found	Not Found	Not Found	1	1	1	Not Found	Not Found	Not Found	Not Found	Not Found	Not Found	Not Found	Not Found	1	Not Found	1	Not Found	1	1	1	1	Not Found
High	F6XYD3	FYN binding protein 1 OS=Canis lupus familiaris OX=9615 GN=FYB1 PE=4 SV=2	C_familiaris	2	20	2	1.752	0.938246	Not Found	Not Found	Not Found	Not Found	1	Not Found	Not Found	1	1	Not Found	1	Not Found	1	1	1	1	1	1	1	1	1	Not Found	Not Found	Not Found	Not Found	Not Found	Not Found	Not Found	Not Found	Not Found	Not Found	1	1	Not Found	Not Found	Not Found	Not Found	Not Found	Not Found	Not Found	1
High	J9NVT2	Hypoxanthine phosphoribosyltransferase OS=Canis lupus familiaris OX=9615 GN=HPRT1 PE=3 SV=1	C_familiaris	2	19	2	6.531	0.443159	Not Found	Not Found	Not Found	Not Found	Not Found	Not Found	Not Found	1	1	1	1	Not Found	1	1	Not Found	Not Found	1	Not Found	1	1	1	Not Found	Not Found	Not Found	Not Found	Not Found	Not Found	1	1	1	Not Found	Not Found	1	1	1	Not Found	Not Found	Not Found	Not Found	Not Found	1
High	F1PM26	CD109 molecule OS=Canis lupus familiaris OX=9615 GN=CD109 PE=4 SV=3	C_familiaris	2	3	2	0.55	0.940442	Not Found	Not Found	1	1	1	1	1	1	1	Not Found	1	Not Found	1	1	1	Not Found	Not Found	1	Not Found	Not Found	Not Found	Not Found	Not Found	Not Found	Not Found	Not Found	Not Found	Not Found	Not Found	Not Found	Not Found	Not Found	Not Found	1	Not Found	Not Found	Not Found	Not Found	1	1	1
High	A0A5F4D6J0	Protocadherin 1 OS=Canis lupus familiaris OX=9615 GN=PCDH1 PE=4 SV=1	C_familiaris	5	27	5	1.508	0.953219	1	1	1	1	1	1	1	1	1	Not Found	1	1	Not Found	Not Found	Not Found	1	1	1	1	1	1	1	1	1	1	Not Found	Not Found	Not Found	Not Found	Not Found	Not Found	Not Found	Not Found	Not Found	Not Found	1	1	1	Not Found	Not Found	1
High	A0A5F4CYB6	Uncharacterized protein OS=Canis lupus familiaris OX=9615 GN=PKM PE=4 SV=1	C_familiaris	20	339	2	1.001	0.997778	Not Found	1	1	1	1	1	1	1	1	1	1	1	Not Found	Not Found	1	Not Found	Not Found	Not Found	1	1	1	Not Found	Not Found	Not Found	Not Found	Not Found	Not Found	Not Found	Not Found	Not Found	Not Found	Not Found	Not Found	Not Found	Not Found	Not Found	Not Found	1	Not Found	Not Found	Not Found
High	A0A5F4CA42	Uncharacterized protein OS=Canis lupus familiaris OX=9615 PE=4 SV=1	C_familiaris	10	2989	2	1.913	0.933819	1	1	1	1	1	1	Not Found	1	1	Not Found	Not Found	Not Found	Not Found	1	Not Found	Not Found	Not Found	Not Found	1	1	1	Not Found	Not Found	1	1	1	1	1	1	1	1	1	1	1	1	1	Not Found	Not Found	1	1	1
High	E2RBA8	PDZ and LIM domain 5 OS=Canis lupus familiaris OX=9615 GN=PDLIM5 PE=4 SV=1	C_familiaris	7	30	7	6.032	0.43692	1	Not Found	1	1	Not Found	Not Found	Not Found	1	1	1	1	1	Not Found	Not Found	Not Found	Not Found	1	Not Found	Not Found	1	Not Found	Not Found	Not Found	Not Found	Not Found	Not Found	Not Found	1	1	1	1	1	Not Found	Not Found	1	Not Found	Not Found	Not Found	Not Found	Not Found	1
High	J9NYQ3	Acid sphingomyelinase-like phosphodiesterase OS=Canis lupus familiaris OX=9615 GN=SMPDL3A PE=3 SV=2	C_familiaris	4	17	4	2.995	0.854371	Not Found	Not Found	Not Found	Not Found	Not Found	Not Found	Not Found	Not Found	Not Found	1	Not Found	Not Found	1	1	1	1	1	1	Not Found	Not Found	Not Found	Not Found	1	1	Not Found	Not Found	Not Found	Not Found	1	1	Not Found	Not Found	Not Found	Not Found	Not Found	Not Found	Not Found	Not Found	Not Found	Not Found	1
High	A0A5F4CB57	Tissue alpha-L-fucosidase OS=Canis lupus familiaris OX=9615 GN=FUCA1 PE=4 SV=1	C_familiaris	6	26	6	2.588	0.884543	Not Found	1	Not Found	Not Found	Not Found	Not Found	1	Not Found	1	1	Not Found	1	1	1	1	1	Not Found	1	1	1	1	1	1	1	Not Found	Not Found	Not Found	1	1	1	1	1	1	1	1	1	1	1	Not Found	Not Found	Not Found
High	E2RQ08	Dolichyl-diphosphooligosaccharide--protein glycosyltransferase subunit 1 OS=Canis lupus familiaris OX=9615 GN=RPN1 PE=1 SV=1	C_familiaris	2	5	2	2.561	0.910769	1	Not Found	1	1	Not Found	Not Found	Not Found	Not Found	Not Found	Not Found	Not Found	Not Found	Not Found	Not Found	Not Found	1	1	1	1	1	1	Not Found	Not Found	Not Found	Not Found	Not Found	Not Found	Not Found	Not Found	Not Found	Not Found	Not Found	Not Found	Not Found	Not Found	Not Found	Not Found	Not Found	Not Found	Not Found	Not Found
High	A0A5F4DI49	Glycyl-tRNA synthetase OS=Canis lupus familiaris OX=9615 GN=GARS1 PE=4 SV=1	C_familiaris	5	10	5	1.353	0.953219	Not Found	Not Found	Not Found	Not Found	Not Found	Not Found	Not Found	1	1	Not Found	Not Found	Not Found	1	1	1	1	1	1	1	1	1	1	1	1	Not Found	Not Found	1	1	1	Not Found	1	Not Found	Not Found	Not Found	Not Found	Not Found	Not Found	1	1	1	1
High	F1PCD8	Laminin subunit beta 1 OS=Canis lupus familiaris OX=9615 GN=LAMB1 PE=4 SV=3	C_familiaris	4	7	4	1.127	0.988271	Not Found	Not Found	Not Found	Not Found	1	1	1	Not Found	1	Not Found	Not Found	Not Found	1	1	1	1	1	1	1	1	1	1	1	1	Not Found	Not Found	Not Found	1	1	1	1	1	Not Found	Not Found	Not Found	Not Found	Not Found	Not Found	Not Found	Not Found	Not Found
High	J9NRT0	Alpha-mannosidase OS=Canis lupus familiaris OX=9615 GN=MAN2A1 PE=3 SV=2	C_familiaris	2	6	2	2.709	0.884543	1	1	1	1	1	1	1	1	1	1	1	Not Found	Not Found	Not Found	1	1	1	1	Not Found	1	Not Found	Not Found	Not Found	Not Found	Not Found	Not Found	Not Found	1	Not Found	Not Found	Not Found	Not Found	Not Found	Not Found	Not Found	Not Found	Not Found	Not Found	Not Found	Not Found	Not Found
High	E2QT84	Beta-ureidopropionase 1 OS=Canis lupus familiaris OX=9615 GN=UPB1 PE=4 SV=1	C_familiaris	3	9	3	3.003	0.841834	1	1	Not Found	Not Found	Not Found	Not Found	Not Found	Not Found	1	1	1	1	Not Found	Not Found	1	Not Found	Not Found	Not Found	1	1	1	Not Found	Not Found	Not Found	Not Found	Not Found	Not Found	Not Found	Not Found	Not Found	1	1	Not Found	Not Found	Not Found	Not Found	Not Found	Not Found	Not Found	Not Found	1
High	Q5W412	Proteasome subunit beta OS=Canis lupus familiaris OX=9615 GN=PSMB9 PE=3 SV=1	C_familiaris	3	30	3	5.157	0.526871	1	1	1	1	1	Not Found	1	1	1	Not Found	Not Found	1	1	1	1	Not Found	1	1	Not Found	Not Found	Not Found	Not Found	Not Found	Not Found	1	1	1	1	1	1	1	1	1	1	1	1	1	1	Not Found	1	Not Found
High	F1PIP7	Collagen type VII alpha 1 chain OS=Canis lupus familiaris OX=9615 GN=COL7A1 PE=4 SV=2	C_familiaris	4	12	4	1.825	0.938246	Not Found	Not Found	1	1	1	1	1	Not Found	1	Not Found	Not Found	1	1	1	1	1	1	1	1	1	1	Not Found	Not Found	Not Found	Not Found	Not Found	Not Found	Not Found	Not Found	Not Found	Not Found	Not Found	1	1	1	1	1	Not Found	1	1	1
High	A0A5F4DF90	P21 (RAC1) activated kinase 2 OS=Canis lupus familiaris OX=9615 GN=PAK2 PE=4 SV=1	C_familiaris	5	11	5	1.263	0.972144	Not Found	Not Found	Not Found	1	Not Found	Not Found	Not Found	1	1	1	1	1	Not Found	Not Found	Not Found	Not Found	Not Found	Not Found	Not Found	Not Found	Not Found	Not Found	Not Found	Not Found	1	1	Not Found	1	1	1	1	1	1	1	1	Not Found	Not Found	1	Not Found	Not Found	Not Found
High	F1P6U6	Cadherin 11 OS=Canis lupus familiaris OX=9615 GN=CDH11 PE=4 SV=2	C_familiaris	4	26	4	4.356	0.709943	Not Found	Not Found	Not Found	Not Found	Not Found	Not Found	Not Found	Not Found	Not Found	Not Found	Not Found	1	Not Found	Not Found	Not Found	Not Found	1	1	Not Found	1	1	Not Found	Not Found	Not Found	Not Found	1	1	Not Found	Not Found	Not Found	Not Found	Not Found	Not Found	1	Not Found	1	1	1	Not Found	Not Found	1
High	E2REP3	Matrix Gla protein OS=Canis lupus familiaris OX=9615 GN=MGP PE=4 SV=3	C_familiaris	2	7	2	3.341	0.748463	Not Found	Not Found	Not Found	Not Found	Not Found	Not Found	Not Found	Not Found	Not Found	Not Found	Not Found	Not Found	Not Found	Not Found	Not Found	Not Found	1	1	Not Found	Not Found	Not Found	1	1	1	Not Found	Not Found	Not Found	Not Found	Not Found	Not Found	1	Not Found	Not Found	Not Found	Not Found	1	Not Found	Not Found	Not Found	Not Found	Not Found
High	A0A5F4CZM2	Stromal interaction molecule 1 OS=Canis lupus familiaris OX=9615 GN=STIM1 PE=4 SV=1	C_familiaris	3	7	3	4.238	0.710779	Not Found	Not Found	Not Found	Not Found	Not Found	Not Found	1	1	1	1	1	1	1	1	1	Not Found	Not Found	Not Found	Not Found	Not Found	Not Found	Not Found	Not Found	Not Found	Not Found	1	1	Not Found	Not Found	1	1	1	Not Found	Not Found	Not Found	Not Found	1	1	Not Found	Not Found	Not Found
High	A0A5F4CXK5	Ectonucleotide pyrophosphatase/phosphodiesterase 2 OS=Canis lupus familiaris OX=9615 GN=ENPP2 PE=4 SV=1	C_familiaris	6	16	6	1.787	0.938246	Not Found	1	1	Not Found	Not Found	Not Found	Not Found	Not Found	1	Not Found	Not Found	1	Not Found	Not Found	Not Found	Not Found	Not Found	Not Found	Not Found	Not Found	Not Found	Not Found	Not Found	Not Found	Not Found	Not Found	Not Found	1	1	1	Not Found	1	Not Found	1	Not Found	1	Not Found	1	1	1	Not Found
High	H9GW54	Drebrin like OS=Canis lupus familiaris OX=9615 GN=DBNL PE=4 SV=3	C_familiaris	4	39	2	0.714	0.952731	1	Not Found	1	Not Found	Not Found	Not Found	1	1	1	Not Found	Not Found	Not Found	Not Found	Not Found	Not Found	Not Found	Not Found	Not Found	1	1	1	Not Found	Not Found	Not Found	Not Found	Not Found	Not Found	Not Found	Not Found	Not Found	Not Found	Not Found	Not Found	Not Found	Not Found	1	Not Found	Not Found	Not Found	Not Found	Not Found
High	A0A5F4DLF5	Titin OS=Canis lupus familiaris OX=9615 GN=TTN PE=4 SV=1	C_familiaris	2	4	2	3.314	0.854371	1	Not Found	1	Not Found	1	1	Not Found	Not Found	Not Found	Not Found	Not Found	1	Not Found	Not Found	Not Found	Not Found	1	1	1	1	1	Not Found	Not Found	Not Found	1	1	1	Not Found	Not Found	Not Found	Not Found	Not Found	Not Found	1	1	Not Found	Not Found	Not Found	1	1	Not Found
High	A0A5F4DIQ4	Superoxide dismutase 3 OS=Canis lupus familiaris OX=9615 GN=SOD3 PE=4 SV=1	C_familiaris	3	9	3	1.057	0.995619	Not Found	Not Found	Not Found	Not Found	1	1	1	1	1	Not Found	1	1	Not Found	Not Found	Not Found	Not Found	Not Found	1	Not Found	Not Found	Not Found	Not Found	Not Found	Not Found	Not Found	Not Found	Not Found	Not Found	Not Found	Not Found	Not Found	Not Found	Not Found	Not Found	Not Found	1	1	1	Not Found	Not Found	Not Found
High	J9PAQ5	Protein S100 OS=Canis lupus familiaris OX=9615 GN=S100A12 PE=3 SV=1	C_familiaris	3	5	3	3.303	0.823214	1	Not Found	1	1	1	Not Found	1	1	1	1	1	Not Found	Not Found	Not Found	Not Found	Not Found	1	Not Found	Not Found	Not Found	Not Found	1	Not Found	Not Found	Not Found	Not Found	Not Found	Not Found	Not Found	Not Found	Not Found	1	Not Found	Not Found	Not Found	Not Found	Not Found	Not Found	Not Found	Not Found	Not Found
High	A0A5F4CI22	Uncharacterized protein OS=Canis lupus familiaris OX=9615 PE=4 SV=1	C_familiaris	7	2812	2	0.753	0.976102	1	1	Not Found	1	Not Found	Not Found	Not Found	Not Found	Not Found	1	Not Found	Not Found	Not Found	1	Not Found	1	Not Found	Not Found	Not Found	1	1	1	Not Found	1	Not Found	Not Found	1	Not Found	Not Found	Not Found	Not Found	Not Found	Not Found	Not Found	Not Found	Not Found	Not Found	Not Found	Not Found	Not Found	Not Found
High	J9PBE6	Glutamic--pyruvic transaminase OS=Canis lupus familiaris OX=9615 GN=GPT PE=4 SV=2	C_familiaris	2	6	2	1.827	0.933819	Not Found	Not Found	Not Found	Not Found	Not Found	Not Found	Not Found	Not Found	Not Found	1	Not Found	Not Found	1	Not Found	Not Found	Not Found	Not Found	Not Found	Not Found	Not Found	Not Found	Not Found	Not Found	1	Not Found	Not Found	Not Found	1	1	Not Found	Not Found	Not Found	Not Found	1	1	Not Found	Not Found	Not Found	1	1	Not Found
High	A0A5F4CYV2	Succinate dehydrogenase complex flavoprotein subunit A OS=Canis lupus familiaris OX=9615 GN=SDHA PE=4 SV=1	C_familiaris	2	2	2	100	1.65492e-16	Not Found	Not Found	Not Found	Not Found	Not Found	Not Found	Not Found	Not Found	1	Not Found	Not Found	Not Found	Not Found	Not Found	Not Found	Not Found	Not Found	Not Found	Not Found	Not Found	Not Found	Not Found	Not Found	Not Found	Not Found	Not Found	Not Found	Not Found	Not Found	Not Found	Not Found	Not Found	Not Found	Not Found	Not Found	Not Found	Not Found	Not Found	Not Found	Not Found	Not Found
High	F1PI70	Transforming growth factor beta OS=Canis lupus familiaris OX=9615 GN=TGFB1 PE=3 SV=2	C_familiaris	4	31	4	1.342	0.953219	Not Found	Not Found	1	1	1	1	1	1	1	Not Found	Not Found	Not Found	Not Found	Not Found	Not Found	1	1	1	Not Found	Not Found	Not Found	Not Found	1	Not Found	Not Found	Not Found	Not Found	Not Found	Not Found	Not Found	Not Found	Not Found	1	1	Not Found	1	Not Found	1	Not Found	1	Not Found
High	F1Q3C4	Uncharacterized protein OS=Canis lupus familiaris OX=9615 GN=LOC479912 PE=3 SV=3	C_familiaris	2	8	2	0.213	0.538987	1	1	1	1	1	1	1	Not Found	Not Found	Not Found	1	Not Found	Not Found	Not Found	Not Found	Not Found	Not Found	Not Found	Not Found	Not Found	Not Found	1	1	1	1	Not Found	Not Found	Not Found	Not Found	Not Found	Not Found	Not Found	Not Found	Not Found	Not Found	Not Found	Not Found	Not Found	Not Found	Not Found	1
High	A0A5F4DIU8	Uncharacterized protein OS=Canis lupus familiaris OX=9615 GN=FUBP1 PE=4 SV=1	C_familiaris	5	15	5	2.052	0.933819	1	Not Found	1	Not Found	Not Found	Not Found	Not Found	Not Found	1	Not Found	1	1	Not Found	1	Not Found	Not Found	Not Found	Not Found	1	1	1	Not Found	Not Found	Not Found	Not Found	Not Found	Not Found	Not Found	Not Found	Not Found	Not Found	Not Found	Not Found	Not Found	Not Found	Not Found	Not Found	Not Found	1	Not Found	Not Found
High	E2QZQ9	Activating transcription factor 6 beta OS=Canis lupus familiaris OX=9615 GN=ATF6B PE=4 SV=3	C_familiaris	2	11	2	12.171	0.0969352	Not Found	Not Found	Not Found	Not Found	Not Found	1	Not Found	Not Found	1	Not Found	Not Found	Not Found	Not Found	Not Found	Not Found	Not Found	Not Found	Not Found	Not Found	Not Found	Not Found	Not Found	Not Found	Not Found	Not Found	Not Found	Not Found	Not Found	Not Found	Not Found	Not Found	1	Not Found	Not Found	1	Not Found	Not Found	1	Not Found	Not Found	Not Found
High	E2RIF3	Transgelin OS=Canis lupus familiaris OX=9615 GN=TAGLN PE=3 SV=2	C_familiaris	2	4	2	1.419	0.95312	Not Found	Not Found	Not Found	Not Found	1	Not Found	1	Not Found	Not Found	Not Found	Not Found	Not Found	Not Found	Not Found	Not Found	Not Found	Not Found	Not Found	Not Found	Not Found	Not Found	Not Found	Not Found	Not Found	Not Found	Not Found	Not Found	Not Found	Not Found	Not Found	Not Found	Not Found	Not Found	Not Found	Not Found	Not Found	Not Found	Not Found	Not Found	Not Found	Not Found
High	J9P7R7	Shootin 1 OS=Canis lupus familiaris OX=9615 GN=SHTN1 PE=4 SV=1	C_familiaris	3	16	3	1.79	0.938246	Not Found	Not Found	1	1	1	1	Not Found	Not Found	Not Found	Not Found	Not Found	1	1	1	1	Not Found	Not Found	Not Found	1	1	1	Not Found	Not Found	Not Found	Not Found	Not Found	Not Found	Not Found	Not Found	Not Found	Not Found	Not Found	Not Found	Not Found	Not Found	Not Found	Not Found	Not Found	Not Found	Not Found	1
High	A0A5F4C6X4	Dihydrolipoyl dehydrogenase, mitochondrial OS=Canis lupus familiaris OX=9615 GN=DLD PE=4 SV=1	C_familiaris	2	2	2	0.656	0.952439	Not Found	Not Found	Not Found	Not Found	Not Found	Not Found	Not Found	Not Found	Not Found	Not Found	Not Found	Not Found	Not Found	Not Found	Not Found	Not Found	Not Found	Not Found	Not Found	Not Found	Not Found	Not Found	Not Found	Not Found	Not Found	Not Found	Not Found	Not Found	Not Found	Not Found	Not Found	Not Found	1	1	1	Not Found	Not Found	Not Found	Not Found	Not Found	Not Found
High	A0A5F4D2W4	Uncharacterized protein OS=Canis lupus familiaris OX=9615 GN=DLA-79 PE=4 SV=1	C_familiaris	3	5	3	2.315	0.933819	Not Found	1	Not Found	Not Found	Not Found	Not Found	Not Found	Not Found	Not Found	Not Found	Not Found	Not Found	Not Found	Not Found	Not Found	Not Found	Not Found	Not Found	Not Found	Not Found	Not Found	Not Found	Not Found	Not Found	Not Found	Not Found	Not Found	Not Found	Not Found	Not Found	Not Found	Not Found	Not Found	Not Found	Not Found	Not Found	Not Found	Not Found	Not Found	Not Found	Not Found
High	E2RSJ3	LIM domain containing preferred translocation partner in lipoma OS=Canis lupus familiaris OX=9615 GN=LPP PE=4 SV=3	C_familiaris	2	10	2	100	1.65492e-16	Not Found	Not Found	Not Found	Not Found	Not Found	Not Found	Not Found	Not Found	Not Found	Not Found	Not Found	Not Found	Not Found	Not Found	Not Found	Not Found	Not Found	Not Found	Not Found	Not Found	Not Found	Not Found	Not Found	Not Found	Not Found	Not Found	Not Found	Not Found	Not Found	Not Found	Not Found	Not Found	Not Found	Not Found	Not Found	Not Found	Not Found	Not Found	Not Found	Not Found	Not Found
High	E2RJK1	SH3 domain binding protein 1 OS=Canis lupus familiaris OX=9615 GN=SH3BP1 PE=4 SV=3	C_familiaris	5	11	5	3.014	0.854406	1	1	1	Not Found	1	1	1	Not Found	1	Not Found	Not Found	Not Found	1	1	1	Not Found	Not Found	Not Found	Not Found	Not Found	Not Found	1	Not Found	Not Found	Not Found	Not Found	Not Found	Not Found	Not Found	Not Found	1	1	Not Found	Not Found	Not Found	Not Found	Not Found	1	Not Found	Not Found	Not Found
High	A0A5F4C7I2	Family with sequence similarity 71 member F1 OS=Canis lupus familiaris OX=9615 GN=FAM71F1 PE=4 SV=1	C_familiaris	4	17	4	6.307	0.403923	Not Found	Not Found	1	Not Found	Not Found	Not Found	Not Found	Not Found	1	1	1	1	Not Found	Not Found	Not Found	Not Found	Not Found	Not Found	Not Found	Not Found	Not Found	Not Found	Not Found	Not Found	1	1	1	Not Found	Not Found	Not Found	Not Found	Not Found	Not Found	Not Found	Not Found	Not Found	Not Found	Not Found	Not Found	Not Found	Not Found
High	J9NWI6	Dynactin subunit 1 OS=Canis lupus familiaris OX=9615 GN=DCTN1 PE=4 SV=2	C_familiaris	3	8	3	4.552	0.604538	Not Found	Not Found	Not Found	Not Found	Not Found	Not Found	Not Found	Not Found	Not Found	Not Found	1	1	Not Found	Not Found	Not Found	Not Found	Not Found	Not Found	Not Found	Not Found	Not Found	Not Found	Not Found	Not Found	Not Found	Not Found	Not Found	Not Found	Not Found	Not Found	1	Not Found	Not Found	Not Found	Not Found	Not Found	Not Found	Not Found	Not Found	Not Found	Not Found
High	E2R0M4	N-acetylglucosamine-1-phosphate transferase subunit gamma OS=Canis lupus familiaris OX=9615 GN=GNPTG PE=4 SV=3	C_familiaris	5	23	5	0.581	0.940442	Not Found	1	1	Not Found	Not Found	1	Not Found	Not Found	Not Found	1	1	1	1	1	1	Not Found	1	1	1	1	1	Not Found	1	Not Found	Not Found	1	Not Found	1	Not Found	Not Found	Not Found	Not Found	Not Found	Not Found	Not Found	1	1	1	1	Not Found	Not Found
High	A0A5F4CZB6	Acyl-CoA synthetase short chain family member 1 OS=Canis lupus familiaris OX=9615 GN=ACSS1 PE=4 SV=1	C_familiaris	3	6	3	1.611	0.938246	Not Found	Not Found	1	1	Not Found	Not Found	Not Found	Not Found	1	Not Found	Not Found	Not Found	Not Found	Not Found	Not Found	Not Found	Not Found	Not Found	Not Found	Not Found	Not Found	Not Found	Not Found	Not Found	Not Found	Not Found	Not Found	Not Found	Not Found	Not Found	Not Found	Not Found	Not Found	Not Found	Not Found	Not Found	Not Found	Not Found	Not Found	Not Found	Not Found
High	F1PPE5	Biorientation of chromosomes in cell division 1 like 1 OS=Canis lupus familiaris OX=9615 GN=BOD1L1 PE=4 SV=3	C_familiaris	2	2	2	100	1.65492e-16	Not Found	Not Found	Not Found	Not Found	Not Found	Not Found	Not Found	Not Found	Not Found	Not Found	Not Found	Not Found	Not Found	Not Found	Not Found	Not Found	Not Found	Not Found	Not Found	Not Found	Not Found	Not Found	Not Found	Not Found	Not Found	Not Found	Not Found	Not Found	Not Found	Not Found	Not Found	Not Found	Not Found	Not Found	Not Found	Not Found	Not Found	Not Found	Not Found	Not Found	Not Found
High	E2REK5	Transportin 3 OS=Canis lupus familiaris OX=9615 GN=TNPO3 PE=4 SV=3	C_familiaris	2	2	2	3.048	0.847605	Not Found	Not Found	Not Found	Not Found	Not Found	Not Found	Not Found	1	1	1	1	1	Not Found	Not Found	Not Found	Not Found	Not Found	Not Found	1	Not Found	Not Found	Not Found	Not Found	Not Found	Not Found	1	Not Found	1	1	1	Not Found	Not Found	Not Found	Not Found	Not Found	Not Found	Not Found	Not Found	Not Found	Not Found	1
High	F1P9P7	Stromal cell derived factor 4 OS=Canis lupus familiaris OX=9615 GN=SDF4 PE=4 SV=3	C_familiaris	2	6	2	100	1.65492e-16	Not Found	Not Found	Not Found	Not Found	Not Found	Not Found	Not Found	Not Found	Not Found	Not Found	Not Found	Not Found	Not Found	Not Found	Not Found	Not Found	Not Found	Not Found	Not Found	Not Found	Not Found	Not Found	Not Found	Not Found	Not Found	Not Found	Not Found	Not Found	Not Found	Not Found	Not Found	Not Found	Not Found	Not Found	Not Found	Not Found	Not Found	Not Found	Not Found	Not Found	Not Found
High	F1PNI8	Pro-interleukin-16 OS=Canis lupus familiaris OX=9615 GN=IL16 PE=4 SV=3	C_familiaris	5	9	5	3.441	0.849176	1	Not Found	Not Found	Not Found	1	Not Found	1	Not Found	1	Not Found	Not Found	1	Not Found	Not Found	Not Found	Not Found	Not Found	Not Found	Not Found	Not Found	Not Found	Not Found	Not Found	1	Not Found	Not Found	Not Found	Not Found	Not Found	1	Not Found	Not Found	Not Found	Not Found	Not Found	1	1	1	Not Found	Not Found	Not Found
High	E2R231	Dickkopf WNT signaling pathway inhibitor 3 OS=Canis lupus familiaris OX=9615 GN=DKK3 PE=4 SV=3	C_familiaris	4	7	4	0.621	0.944788	Not Found	Not Found	Not Found	Not Found	Not Found	Not Found	Not Found	Not Found	Not Found	Not Found	Not Found	Not Found	Not Found	Not Found	Not Found	Not Found	Not Found	Not Found	Not Found	Not Found	Not Found	Not Found	Not Found	1	Not Found	Not Found	Not Found	Not Found	Not Found	Not Found	Not Found	Not Found	Not Found	Not Found	Not Found	Not Found	Not Found	Not Found	Not Found	Not Found	Not Found
High	G1K299	Beta-glucuronidase OS=Canis lupus familiaris OX=9615 GN=GUSB PE=3 SV=2	C_familiaris	3	9	3	0.309	0.850672	1	1	Not Found	Not Found	Not Found	Not Found	Not Found	Not Found	Not Found	1	1	1	Not Found	Not Found	Not Found	1	Not Found	Not Found	Not Found	Not Found	Not Found	Not Found	Not Found	Not Found	Not Found	Not Found	Not Found	Not Found	Not Found	Not Found	Not Found	Not Found	Not Found	Not Found	Not Found	Not Found	Not Found	Not Found	Not Found	Not Found	Not Found
High	A0A5F4BXK6	Carboxylesterase 5A OS=Canis lupus familiaris OX=9615 GN=CES5A PE=4 SV=1	C_familiaris	5	25	5	1.612	0.944788	Not Found	1	Not Found	Not Found	Not Found	Not Found	Not Found	Not Found	Not Found	Not Found	1	Not Found	Not Found	Not Found	Not Found	Not Found	Not Found	Not Found	Not Found	Not Found	Not Found	Not Found	Not Found	Not Found	Not Found	Not Found	Not Found	Not Found	Not Found	1	Not Found	Not Found	Not Found	Not Found	Not Found	Not Found	Not Found	1	Not Found	Not Found	Not Found
[truncated: 63 more columns]
