# Supplementary material for: Characterization and Proteomic Analysis of Plasma EVs Recovered from Healthy and Diseased Dogs with Canine Leishmaniosis
Source: Int J Mol Sci. 2023 Mar 13;24(6):5490. doi: 10.3390/ijms24065490 (PMC10056832; doi:10.3390/ijms24065490)
Supplement: Supplementary file 1 [file ijms-24-05490-s001.zip › ijms-2208855-supplementary/Table S6.xlsx]

## Sheet: Table S6
TriTryp DB Acession Number	Accession	Acession number NCBI (L. infantum / L. donovani)	Description	Peptides	Blast (100% match with Leishmania spp / Match with other species)	Peptides	PSMs	Unique Peptides	Total number of dogs
LINF_340037500	A0A381MTN1	XP_001468654.1/ TPP46809.1	Phosphatidylinositol-4-phosphate-5-kinase-likep ro tein OS=Leishmania infantum	[R].CFTADQGGMMSNKVPGLR.[Q]	100% match with Leishmania spp	1	1	1	1
LINF_030011900	A4HRV7	XP_001462799.1 / XP_003858032.1	Uncharacterized protein OS=Leishmania infantum	[K].ELAMVQWMARIAEMR.[R]	100% match with Leishmania spp	1	1	1	1
LINF_040013050	A4HS77	XP_001462919.1 / XP_003858142.1	Uncharacterized protein OS=Leishmania infantum	[R].DLLAIQEAQLQQQHK.[Q]	100% match with Leishmania spp	1	1	1	1
LINF_040014400	A4HS91	XP_001462933.1 / XP_003861705.1	Putative chaperone protein DNAj OS=Leishmania infantum	[K].ALHPDVNPSPTAAEDFAEAK.[Q]	Match with other species	1	1	1	1
LINF_050014800	A4HSL8	XP_001463059.1 / XP_003858283.1	Dipeptidyl peptidase 3 OS=Leishmania infantum	[R].APNPIVQITENAK.[E]	100% match with Leishmania spp	1	4	1	1
LINF_060012300	A4HSV8	XP_001463149.2 / XP_003858375.1	Uncharacterized protein OS=Leishmania infantum	[R].SAAANAVRSDPR.[S]	100% match with Leishmania spp	1	1	1	1
LINF_060016900	A4HT03	XP_001463194.2 / XP_003858421.1	Uncharacterized protein OS=Leishmania infantum	[R].LRMMSVMPLPR.[G]	100% match with Leishmania spp	1	1	1	1
LINF_070014200	A4HTA8	XP_001463299.1 / XP_003858529.1	Phosphoacetylglucosamine mutase OS=Leishmania infantum	[K].WCTRAANASSGSDLERVMMDCLAHDPR.[V]	100% match with Leishmania spp	1	1	1	1
LINF_080006200	A4HTG3	XP_001463354.1 / XP_003858578.1	Uncharacterized protein OS=Leishmania infantum	[R].RTSGLSEFTPTRVLDMSSAR.[V]	100% match with Leishmania spp	1	8	1	1
LINF_090010000	A4HTV5	XP_001463496.1 / AYU76486.1	Uncharacterized protein OS=Leishmania infantum	[R].YFQNDSGHMCIVMPK.[Y]	Match with other species	1	1	1	1
LINF_100013400	A4HUH8	XP_001463719.2 / XP_003858907.1	Uncharacterized protein OS=Leishmania infantum	[R].LQQQLQR.[T]	Match with other species	1	1	1	1
LINF_100015100	A4HUJ6	XP_001463737.1 / XP_003858925.1	Uncharacterized protein OS=Leishmania infantum	[K].ELLLASQHPAIRQLCNR.[L]	100% match with Leishmania spp	1	1	1	1
LINF_110007900	A4HUU1	XP_001463832.1/ XP_003859007.1	Uncharacterized protein OS=Leishmania infantum	[R].SLLHTRSMLSMELK.[K]	100% match with Leishmania spp	1	11	1	1
LINF_110012300	A4HUX6	XP_001463867.1 / XP_003859043.1	Uncharacterized protein OS=Leishmania infantum	[K].IEGSVVR.[L]	100% match with Leishmania spp	1	1	1	1
LINF_130012400	A4HVK3	XP_001464094.1 / TPP50105.1	Uncharacterized protein OS=Leishmania infantum	[R].YSVDFGGLFMMPQLNLGEMMVK.[E]	100% match with Leishmania spp	1	1	1	1
LINF_140007000	A4HVW3	XP_001464204.1 / XP_003859393.1	Uncharacterized protein OS=Leishmania infantum	[K].AVIYNYR.[T]	100% match with Leishmania spp	1	2	1	1
LINF_140017150	A4HW52	XP_001464293.1 / XP_003859484.1	Uncharacterized protein OS=Leishmania infantum	[R].RAEEMHGYAREGSAQLS.[-]	100% match with Leishmania spp	1	1	1	1
LINF_140020200	A4HW84	XP_001464325.1 / XP_003859513.1	Uncharacterized protein OS=Leishmania infantum	[R].SLLVDDPLDIEVGAQWEHLEAELQR.[L]	100% match with Leishmania spp	1	1	1	1
LINF_140020900	A4HW91	XP_001464332.1 / XP_003859520.1	Uncharacterized protein OS=Leishmania infantum	[K].EESSSEEEELLVIGAVPLEFER.[L]	100% match with Leishmania spp	1	1	1	4
						1	1	1
						1	1	1
						1	1	1
LINF_160013300	A4HWX5	XP_001464566.1/ XP_003859765.1	Uncharacterized protein OS=Leishmania infantum	[K].YYGIYTDR.[L]	100% match with Leishmania spp	1	3	1	1
LINF_160020100	A4HX38	XP_001464629.1 / XP_003859835.1	Uncharacterized protein OS=Leishmania infantum	[K].TLVSLQPK.[L]	100% match with Leishmania spp	1	1	1	3
						1	1	1
						1	3	1
LINF_170017100	A4HXH7	XP_001464768.1 / XP_003859964.1	Uncharacterized protein OS=Leishmania infantum	[R].DAALMEDAFCFLQFVR.[G]	Match with other species	1	1	1	1
LINF_180010700	A4HXT2	XP_001464873.1 / XP_003860071.1	Uncharacterized protein OS=Leishmania infantum	[K].APSTLPTKQQKPTESDAR.[R]	100% match with Leishmania spp	1	3	1	1
LINF_190010100	A4HY74	XP_001465015.1 / XP_003860230.1	Uncharacterized protein OS=Leishmania infantum	[R].YTADRVENTKNIIFWQHCR.[Y]	100% match with Leishmania spp	1	6	1	2
						1	2	1
LINF_190011400	A4HY86	XP_001465027.2 / XP_003860243.1	Uncharacterized protein OS=Leishmania infantum	[K].NDRIIDDPER.[E]	100% match with Leishmania spp	1	1	1	1
LINF_190012100	A4HY92	XP_001465033.1 / XP_003860250.1	Uncharacterized protein OS=Leishmania infantum	[R].AVDGLVSNVQDAK.[V]	100% match with Leishmania spp	1	1	1	1
LINF_200017000	A4HYW2		Putative calpain-like cysteine peptidase OS=Leishmania infantum	[K].LPFTLGLLCPYEIGK.[E]	Match with other species	1	1	1	1
	A4HZ02		Mitochondrial RNA ligase 2 OS=Leishmania infantum GN=REL2	[K].DAGLFNDEWIATEK.[V]	100% match with Leishmania spp	1	1	1	1
LINF_200021900	A4HZ03	XP_001465294.1 / TPP45416.1	Uncharacterized protein OS=Leishmania infantum	[R].ALLQQAGK.[M]	100% match with Leishmania spp	1	1	1	1
LINF_210019400	A4HZ90	XP_001465402.1 / XP_003860655.1	Uncharacterized protein OS=Leishmania infantum	[R].YCEASVNLEDLGR.[C]	100% match with Leishmania spp	1	1	1	1
LINF_210023600	A4HZE7	XP_001465438.1 / XP_003860691.1	Uncharacterized protein OS=Leishmania infantum	[K].AGDYHLVPK.[K]	100% match with Leishmania spp	1	1	1	1
LINF_220006400	A4HZP2	XP_001465533.1 / XP_003860752.1	Uncharacterized protein OS=Leishmania infantum	[K].ITLLEIQEDIAVIER.[A]	100% match with Leishmania spp	1	1	1	1
LINF_220009900	A4HZS2	XP_001465563.2 / XP_003860782.1	Uncharacterized protein OS=Leishmania infantum	[R].MNTCEKTEDQFR.[D]	100% match with Leishmania spp	1	1	1	1
	A4I0F6		Hydrophilic acylated surface protein a OS=Leishmania infantum GN=HASPA2	[R].TSGMRRR.[R]	100% match with Leishmania spp	1	1	1	1
LINF_250017900	A4I1G0	XP_001466152.1 / TPP40735.1	ATPase beta subunit, putative (Fragment) OS=Leishmania infantum	[K].IGLFGGAGVGK.[T]	Match with other species	1	1	1	1
LINF_250018450	A4I1G6	XP_001466157.1 / XP_003861456.1	Uncharacterized protein OS=Leishmania infantum	[R].QWANWGVVPESPR.[S]	100% match with Leishmania spp	1	1	1	1
LINF_250023600	A4I1L7	XP_001466208.1 / XP_003861507.1	Uncharacterized protein OS=Leishmania infantum	[R].LLPVEGLAPDR.[L]	100% match with Leishmania spp	1	1	1	1
LINF_250027400	A4I1Q3	XP_001466244.1 / XP_003861543.1	Putative helicase-like protein OS=Leishmania infantum	[R].EAAVGISSSPAPSQSAMDAPAAK.[R]	100% match with Leishmania spp	1	1	1	1
LINF_260022200	A4I2A3		Putative cytochrome c oxidase subunit V OS=Leishmania infantum	[R].TQYASTMDPR.[D]	Match with other species	1	1	1	1
LINF_260030100	A4I2H2	XP_001470583.2 / XP_003861832.1	Uncharacterized protein OS=Leishmania infantum	[R].SMNSVSNALTFHGMSFVDLTR.[K]	100% match with Leishmania spp	1	1	1	1
LINF_270008900	A4I2M5	XP_001466308.1 / XP_003861896.1	Putative nucleoporin OS=Leishmania infantum	[R].YLTQLR.[H]	100% match with Leishmania spp	1	1	1	1
LINF_270017000	A4I2Q8		Putative cysteine desulfurase OS=Leishmania infantum	[R].LLNGLQSR.[L]	Match with other species	1	2	1	1
LINF_280005700	A4I381	XP_001470043.1 / XP_003862109.1	Uncharacterized protein OS=Leishmania infantum	[R].FDKEASMWTSLMEK.[E]	100% match with Leishmania spp	1	1	1	1
LINF_280019600	A4I3L7	XP_001470179.1 / XP_003862248.1	Haloacid dehalogenase-like hydrolase-like protein OS=Leishmania infantum	[-].MTSPDSMVAASVYAR.[R]	100% match with Leishmania spp	1	1	1	1
LINF_280021800	A4I3N6	XP_001470198.1 / XP_003862269.1	Putative hydrolase, alpha/beta fold family OS=Leishmania infantum	[-].MSATLPLSSEVAETSEPPTR.[K]	100% match with Leishmania spp	1	1	1	1
LINF_280023600	A4I3Q0	XP_001470212.1 / XP_003859283.1	Putative proteasome regulatory non-ATP-ase subunit 2 OS=Leishmania infantum	[K].NVAYEENQK.[E]	100% match with Leishmania spp	1	1	1	1
LINF_280025100	A4I3R4	XP_001470226.1 / XP_003862299.1	Uncharacterized protein OS=Leishmania infantum	[R].RSGIDLEPNR.[G]	100% match with Leishmania spp	1	1	1	1
LINF_280028700	A4I3U9	XP_001470261.1 / XP_003862334.1	Uncharacterized protein OS=Leishmania infantum	[R].TIALAQR.[E]	Match with other species	1	1	1	2
						1	1	1
LINF_290018400	A4I4I2		Uncharacterized protein OS=Leishmania infantum	[K].LEAEEVGHGEATAAAAEAPEHSRPSPLVLSHAAVTSMGR.[S]	100% match with Leishmania spp	1	2	1	1
LINF_290020200	A4I4J8	XP_001466667.1 / XP_003862568.1	Uncharacterized protein OS=Leishmania infantum	[R].VVAAVVGEEGGLSR.[T]	100% match with Leishmania spp	1	3	1	1
LINF_300015800	A4I5D3	XP_001466952.1 / XP_003862821.1	Uncharacterized protein OS=Leishmania infantum	[R].FTSFDLGR.[W]	100% match with Leishmania spp	1	1	1	1
LINF_300029900	A4I5S3	XP_001467092.1 / TPP43281.1	DnaJ domain protein-like protein OS=Leishmania infantum	[K].MEEVNHAYK.[L]	Match with other species	1	1	1	1
LINF_310012000	A4I6F7	XP_001467326.1 / TPP41558.1	Uncharacterized protein OS=Leishmania infantum	[R].LISQDDTPVPTQLDR.[V]	100% match with Leishmania spp	1	1	1	1
LINF_310020300	A4I6R2	XP_001467431.1 / XP_003863229.1	Uncharacterized protein OS=Leishmania infantum	[-].MLGNLDAAAGDALR.[S]	100% match with Leishmania spp	1	2	1	1
LINF_320008600	A4I7J9	XP_001467718.1 / XP_003863455.1	Uncharacterized protein OS=Leishmania infantum	[R].EKSFNAGASMWATMEALDRPGMSKDELYMK.[S]	100% match with Leishmania spp	1	2	1	1
LINF_320013600	A4I7P7		Putative serine/threonine protein kinase OS=Leishmania infantum	[R].FVYEGGLYTNAGYTDPKPTDANQTR.[K]	100% match with Leishmania spp	1	1	1	1
LINF_320035700	A4I8A7		Uncharacterized protein OS=Leishmania infantum	[R].LDELLCESSALLHTLEVMDHQAYR.[E]	100% match with Leishmania spp	1	3	1	1
LINF_320036400	A4I8B3	XP_001467982.1 / XP_003864195.1	Uncharacterized protein OS=Leishmania infantum	[R].VVHMETDDGGNLGDK.[L]	100% match with Leishmania spp	1	1	1	1
LINF_320040000	A4I8F0	XP_001468019.1 / XP_003863756.1	Putative mitogen-activated protein kinase OS=Leishmania infantum	[K].YTDYVATR.[W]	Match with other species	1	1	1	1
LINF_320042300	A4I8H2	XP_001468041.1 / XP_003863779.1	Uncharacterized protein OS=Leishmania infantum	[R].LPAAESAVR.[L]	Match with other species	1	1	1	2
						1	1	1
LINF_320043000	A4I8H8	XP_001468047.1 / XP_003863785.1	Uncharacterized protein OS=Leishmania infantum	[-].MLTLTR.[R]	Match with other species	1	2	1	1
LINF_330027700	A4I953	XP_001468272.1 / XP_003864027.1	Uncharacterized protein OS=Leishmania infantum	[R].TEYPCLSFDVVK.[D]	100% match with Leishmania spp	1	1	1	1
LINF_330029800	A4I980	XP_001468299.1 / XP_003864046.1	Putative copper-transporting ATPase-like protein OS=Leishmania infantum	[R].IVQEAQNTKPSIQR.[A]	100% match with Leishmania spp	1	1	1	3
						1	3	1
						1	2	1
LINF_340007500	A4I9J4	XP_001468413.1 / XP_003864191.1	Uncharacterized protein OS=Leishmania infantum	[R].EQVVVQLQREK.[G]	100% match with Leishmania spp	1	2	1	2
						1	1	1
LINF_340019300	A4I9T5	XP_001468504.1 / TPP50399.1	Uncharacterized protein OS=Leishmania infantum OX=5671	[R].SLIQLEADSK.[A]	100% match with Leishmania spp	1	1	1	2
						1	2	1
LINF_340021000	A4I9V2	XP_001468521.2 / XP_003864312.1	Uncharacterized protein OS=Leishmania infantum	[R].QHATLAAAVSLPQR.[V]	100% match with Leishmania spp	1	1	1	1
LINF_340035900	A4IA68	XP_001468637.1 / XP_003864434.1	Uncharacterized protein OS=Leishmania infantum	[K].IQLVLIPICVVFMVWMYPTPTEEDER.[R]	100% match with Leishmania spp	1	1	1	1
	A4IAL5	XP_001468784.1 / TPP46690.1	Quinonoid dihydropteridine reductase OS=Leishmania infantum OX=5671 GN=QDPR-7 PE=4 SV=1	[K].NVLLIGACGALGR.[A]	100% match with Leishmania spp	1	1	1	1
LINF_350008000	A4IAT0	XP_001468849.1 / XP_003864622.1	Uncharacterized protein OS=Leishmania infantum	[R].LQQQLGR.[RL]	Não dá 100% match com nada	1	1	1	1
LINF_350022800	A4IB79	XP_001468998.1 / XP_003864762.1	Putative DNA polymerase epsilon subunit b OS=Leishmania infantum	[R].MQGLSESELR.[D]	100% match with Leishmania spp	1	4	1	6
						1	1	1
						1	6	1
						1	1	1
						1	2	1
						1	1	1
LINF_350025300	A4IBA1	XP_001469020.1 / XP_003864783.1	Uncharacterized protein OS=Leishmania infantum	[R].DHPCYAMLQDTR.[L]	100% match with Leishmania spp	1	1	1	1
LINF_350026200	A4IBA9	XP_001469028.1 / TPP44482.1	Uncharacterized protein OS=Leishmania infantum	[R].LLSSAASAR.[A]	100% match with Leishmania spp	1	1	1	1
LINF_350034700	A4IBI2	XP_001469101.1 / XP_003864878.1	Uncharacterized protein OS=Leishmania infantum	[K].DILAVTR.[I]	100% match with Leishmania spp	1	3	1	2
						1	2	1
LINF_350036500	A4IBK3	XP_001469122.1 / XP_003864896.1	Uncharacterized protein OS=Leishmania infantum	[K].SLFFASTRSCPFMLYSK.[N]	100% match with Leishmania spp	1	1	1	1
LINF_350043100	A4IBR6		Uncharacterized protein OS=Leishmania infantum	[R].LPAACVGVK.[I]	100% match with Leishmania spp	1	1	1	1
LINF_360034500	A4ICH3	XP_001469442.1 / AYU83630.1	Uncharacterized protein OS=Leishmania infantum	[K].AIAAMSTEDVRR.[L]	100% match with Leishmania spp	1	1	1	1
	A4ICS8		Elongation factor G, mitochondrial OS=Leishmania infantum OX=5671 GN=MEFG	[K].SGPQSGSQLFSCEDMYVPPR.[V]	100% match with Leishmania spp	1	1	1	1
LINF_360006600	A4ICX1	XP_001469590.1 / XP_003865135.1	Uncharacterized protein OS=Leishmania infantum	[R].LECQTVWFSPSMLR.[S]	100% match with Leishmania spp	1	3	1	1
LINF_360047400	A4ID11	XP_001469630.1 / XP_003865168.1	Uncharacterized protein OS=Leishmania infantum	[K].QNLETLK.[F]	Match with other species	1	1	1	1
LINF_360045700	A4ID28	XP_001469647.1 / XP_003865501.1	Mitogen activated kinase-like protein OS=Leishmania infantum	[K].RGDALLK.[K]	Match with other species	1	2	1	2
						1	1	1
LINF_360072400	A4IE35	XP_001470004.1 / XP_003865762.1	Uncharacterized protein OS=Leishmania infantum	[K].RPPVEHHFDAATAQLPTLNR.[T]	100% match with Leishmania spp	1	1	1	1
LINF_120005400	E9AGA3	XP_003392255.1 / XP_003863957.1	Uncharacterized protein OS=Leishmania infantum	[R].DQIVLEAMR.[T]	100% match with Leishmania spp	1	1	1	1
LINF_120011000	E9AGE5	XP_003392297.1 / XP_003859170.1	Uncharacterized protein OS=Leishmania infantum	[K].KKMGYLGYELTAEEAAALR.[A]	100% match with Leishmania spp	1	8	1	2
						1	4	1
LINF_210019000	E9AGX8	XP_003392479.1 / XP_003860651.1	Uncharacterized protein OS=Leishmania infantum	[K].DEELEDDEDEDDSAMFSVSAGDLSEAADDDE.[-]	100% match with Leishmania spp	1	2	1	1
LINF_250014300	E9AH96	XP_003392597.1 / XP_003861418.1	Uncharacterized protein OS=Leishmania infantum	[R].ASPVPKQGSSK.[A]	100% match with Leishmania spp	1	1	1	1
LINF_360041500	E9AHX5	XP_003392826.1 / XP_003865461.1	Uncharacterized protein OS=Leishmania infantum	[R].AGRDILK.[Q]	Match with other species	1	1	1	1
LINF_360077800	E9AHZ3	XP_003392844.1 / TPP49479.1	Uncharacterized protein OS=Leishmania infantum	[-].MSSSNEDASDSALQPSPR.[D]	100% match with Leishmania spp	1	1	1	1
LINF_360079100	E9AI05	XP_003392856.1 / XP_003865815.1	Uncharacterized protein OS=Leishmania infantum	[R].LLFGTAATCSFEEVCASPMGR.[K]	100% match with Leishmania spp	1	1	1	1
